# Supplementary material for: Super-enhancer acquisition drives oncogene expression in triple negative breast cancer
Source: PLoS One. 2020 Jun 25;15(6):e0235343. doi: 10.1371/journal.pone.0235343 (PMC7316302; doi:10.1371/journal.pone.0235343)
Supplement: S1 Table — (XLSX) [file pone.0235343.s006.xlsx]

## Sheet: Table_S1
Table S1: ChIP-Seq QC statistics and Rose output statistics
Sample Name	Total sequencing reads	High Quality reads	uniquely mapped reads	total MACs peaks called	Total enhancers called	Total Superenhancers Called	Average Superenhancer Size (rpkm)	Largest Superenhancer Size (rpkm)	Smallest Superenhancer Size (rpkm)
010BTB_Primary_TNBC	45333752	43759356	38434458	68530	31727	1027	32169.9	163910	2794
021VBT_Primary_TNBC	41367851	39822139	32875748	58110	28232	971	32690.7	166977	1766
038BT_Primary_TNBC	39202438	37749408	32343515	60015	26959	1268	39455.4	291507	3248
051BTB_Primary_TNBC	46231855	44620563	38125431	56847	25824	887	39361.5	181878	2767
058BT_Primary_TNBC	44431373	42763512	35949832	55434	25456	767	50539	267030	3122
071BTB_Primary_TNBC	43953255	42401670	37148030	57797	23579	978	53968.8	429489	3318
072BT_Primary_TNBC	44821511	43212232	36926902	53928	22300	779	49253.7	393746	2894
079BTB_Primary_TNBC	47548864	45842560	39795941	59949	25558	1136	47520.2	340957	1993
080BTB_Primary_TNBC	41060767	39498036	33230106	50785	25105	1151	31209.3	143864	3067
081BT_Primary_TNBC	45746943	44087918	37908708	60288	27060	1146	44612	289766	2791
BT20	36068076	35103111	26873324	35998	22251	1057	31749.7	184498	1528
BT549	33416672	32526582	23729363	28942	19241	836	36558.3	225675	3169
CAL120	34677127	33709724	25787031	31376	19142	585	40940	272074	1730
CAL148	28877956	27952382	23646251	32346	19411	724	44520.5	332859	1793
CAL51	31760610	30785346	25185130	37318	19220	560	80314.6	789094	3525
HCC1187	34837859	33875670	24764039	30576	19721	636	36998.1	330559	2583
HCC1395	31613571	30725407	24349989	35835	22812	782	37387.3	213671	2871
HCC1806	36474921	35120839	29351273	34195	20412	464	48723	641071	2165
HCC1954	31728702	22201987	17689691	52439	26985	408	21360.6	96378	2073
HCC2688	33937258	33054292	26488203	42698	27277	1043	33711	240199	2048
HCC38	37029510	35914264	27645568	44568	27399	1205	40394.9	352722	3675
HMEC_1	39803830	38415530	31773140	43863	27696	1273	29212	215843	3144
HMEC_2	37415606	36368231	31282845	86873	33375	1838	29971.3	208433	9416
Hs578T	36099768	35029219	26962553	38649	25450	884	29447.4	165949	2454
hTERT-HME	39628066	38090395	28698597	36654	19406	687	35715.8	185909	2187
MCF10	23401403	23288351	18461851	36284	22262	794	17964.2	138470	2117
MCF7	31940071	30962606	22682297	29040	19538	581	38410.2	252729	2003
MDAMB157	32926126	31982430	24982553	41794	24899	861	42019.9	230506	2600
MDAMB231	29486540	28651598	23871451	32918	22791	1276	30301.9	193625	3674
MDAMB436	36068983	34657936	27453249	23349	18659	601	33776	200702	3230
MDAMB468	28848351	27743072	23318845	33901	20116	474	97557.8	425377	2233
MFM223	36131626	35117312	29693401	35046	22113	459	69940.5	344008	2915
MX1	31594950	30693548	24302766	33578	23541	1013	20386.5	99221	2918
SUM149PT	37070667	35957790	29701017	43118	28402	1152	29168.2	175196	3119
SUM159PT	38932361	37844378	31163932	43565	24015	353	78701.4	322607	17445
T47D	40465747	35803750	29687552	48370	23709	828	36416.1	267801	5493
vHMEC	37345506	36291946	31827118	85936	36085	1412	28773.6	240166	9571
VP303	37157041	36085424	29406597	33299	20941	630	57009.6	410336	6085
ZR75	47358300	41794910	34031788	49112	24674	754	30247.7	158312	4243
