# Supplementary material for: Super-enhancer acquisition drives oncogene expression in triple negative breast cancer
Source: PLoS One. 2020 Jun 25;15(6):e0235343. doi: 10.1371/journal.pone.0235343 (PMC7316302; doi:10.1371/journal.pone.0235343)
Supplement: S2 Table — (XLSX) [file pone.0235343.s007.xlsx]

## Sheet: All enhancer co-ordinates
Table S2: Consensus enhancer and superenhancer coordinates
chromosome	start	end	name
1	605241	606815	Enh_2
1	841396	848084	Enh_4
1	851356	852465	Enh_5
1	858309	858907	Enh_6
1	869812	870300	Enh_7
1	951635	952013	Enh_9
1	953542	953885	Enh_10
1	1079103	1093058	Enh_11
1	1103722	1107867	Enh_12
1	1109428	1109884	Enh_13
1	1140640	1152371	Enh_14
1	1153595	1154661	Enh_15
1	1380311	1384752	Enh_16
1	1387680	1388000	Enh_18
1	1393132	1394213	Enh_19
1	1444034	1444371	Enh_20
1	1451691	1452685	Enh_21
1	1454222	1457228	Enh_22
1	1459383	1466252	Enh_23
1	1487683	1487885	Enh_24
1	1494028	1496494	Enh_26
1	1553808	1557097	Enh_27
1	1558483	1560489	Enh_28
1	1561290	1570132	Enh_29
1	1593526	1595042	Enh_31
1	1639670	1640808	Enh_35
1	1669604	1672267	Enh_37
1	1672637	1672945	Enh_38
1	1696658	1698077	Enh_39
1	1703897	1704999	Enh_40
1	1706753	1708428	Enh_41
1	1748722	1750955	Enh_44
1	1787746	1791091	Enh_45
1	1793329	1794268	Enh_46
1	1797786	1798151	Enh_47
1	1799805	1800253	Enh_48
1	1806312	1807422	Enh_49
1	1817292	1818245	Enh_52
1	1822473	1822855	Enh_53
1	1826211	1827660	Enh_54
1	1833336	1834043	Enh_55
1	1835071	1835325	Enh_56
1	1835472	1835778	Enh_57
1	1839568	1843605	Enh_58
1	1846332	1848066	Enh_59
1	1852236	1864771	Enh_61
1	1871580	1875604	Enh_62
1	1878285	1879165	Enh_63
1	1881266	1883806	Enh_64
1	1886613	1886830	Enh_65
1	1899530	1902029	Enh_66
1	1905454	1912724	Enh_67
1	1928276	1929839	Enh_68
1	1942609	1944531	Enh_69
1	1947336	1947851	Enh_71
1	1955308	1955781	Enh_72
1	1956090	1958343	Enh_73
1	1959720	1960524	Enh_74
1	1968224	1970973	Enh_75
1	1974406	1974740	Enh_76
1	1977347	1978515	Enh_77
1	1979941	1981364	Enh_78
1	1983371	1987480	Enh_79
1	2014255	2015851	Enh_82
1	2024224	2026347	Enh_83
1	2028060	2033709	Enh_84
1	2059371	2062128	Enh_86
1	2079595	2087672	Enh_87
1	2087837	2090432	Enh_88
1	2092074	2092439	Enh_89
1	2093800	2096324	Enh_90
1	2125562	2130057	Enh_93
1	2130271	2141594	Enh_94
1	2142539	2142725	Enh_95
1	2143800	2144819	Enh_96
1	2145974	2146425	Enh_97
1	2153532	2154353	Enh_99
1	2160639	2161765	Enh_100
1	2162654	2163421	Enh_101
1	2164995	2167314	Enh_102
1	2168670	2170773	Enh_103
1	2172005	2176248	Enh_104
1	2177475	2183150	Enh_105
1	2220586	2220849	Enh_106
1	2266230	2280648	Enh_107
1	2282432	2337340	Enh_108
1	2339894	2349158	Enh_109
1	2489489	2512150	Enh_110
1	2603366	2607726	Enh_111
1	2609092	2609719	Enh_112
1	2620389	2622002	Enh_113
1	2631802	2632095	Enh_114
1	2639323	2645316	Enh_116
1	2789428	2789877	Enh_118
1	2820828	2823070	Enh_119
1	2875864	2876307	Enh_121
1	2887631	2891353	Enh_123
1	2905576	2906992	Enh_124
1	2909830	2935975	Enh_125
1	2941856	2944293	Enh_126
1	2945529	2950938	Enh_127
1	2966477	2967727	Enh_128
1	2973893	2976518	Enh_129
1	2979121	2979940	Enh_130
1	3017025	3017321	Enh_131
1	3062692	3064310	Enh_132
1	3074376	3075094	Enh_133
1	3082486	3083300	Enh_134
1	3085515	3086117	Enh_135
1	3095312	3096210	Enh_136
1	3100829	3101765	Enh_137
1	3121655	3122149	Enh_138
1	3132998	3135964	Enh_139
1	3164672	3167192	Enh_140
1	3168898	3175701	Enh_141
1	3180483	3180766	Enh_142
1	3185122	3188599	Enh_143
1	3192914	3198029	Enh_144
1	3207105	3208051	Enh_145
1	3212113	3212384	Enh_146
1	3215529	3215778	Enh_147
1	3219623	3220240	Enh_148
1	3234598	3239010	Enh_149
1	3245496	3247878	Enh_151
1	3259140	3259767	Enh_152
1	3275127	3279722	Enh_154
1	3287437	3288569	Enh_155
1	3289724	3290956	Enh_156
1	3303798	3342210	Enh_157
1	3346117	3379026	Enh_158
1	3380459	3380905	Enh_159
1	3393434	3394601	Enh_160
1	3402582	3405552	Enh_161
1	3406998	3407280	Enh_162
1	3414688	3415880	Enh_163
1	3422382	3424177	Enh_164
1	3424422	3425910	Enh_165
1	3429121	3433044	Enh_167
1	3584660	3604426	Enh_168
1	3627909	3628578	Enh_169
1	3630883	3634119	Enh_170
1	3636224	3636660	Enh_171
1	3642014	3643267	Enh_173
1	3657690	3658248	Enh_175
1	3662456	3665125	Enh_176
1	3727100	3737008	Enh_177
1	3780925	3792172	Enh_179
1	3802842	3806271	Enh_180
1	3816349	3816881	Enh_181
1	3836080	3836471	Enh_182
1	3862801	3864063	Enh_183
1	3868147	3871287	Enh_184
1	3871762	3872198	Enh_185
1	3880905	3881168	Enh_186
1	3890051	3893160	Enh_187
1	3894691	3895656	Enh_188
1	3896108	3896524	Enh_189
1	3910665	3911274	Enh_191
1	3976230	3978742	Enh_192
1	4127451	4128856	Enh_193
1	4359959	4360276	Enh_194
1	4396427	4399567	Enh_195
1	4421046	4423801	Enh_196
1	4602444	4604286	Enh_197
1	4644054	4646502	Enh_198
1	4665448	4672033	Enh_199
1	4677030	4678551	Enh_200
1	4687556	4695417	Enh_201
1	4697744	4704068	Enh_202
1	4705590	4709796	Enh_203
1	4710479	4713176	Enh_204
1	4726172	4729035	Enh_205
1	4754643	4756320	Enh_206
1	4836620	4839428	Enh_207
1	5400083	5401714	Enh_212
1	5402756	5405908	Enh_213
1	5422552	5433657	Enh_214
1	5503495	5505449	Enh_215
1	5510814	5515785	Enh_216
1	5571068	5572322	Enh_220
1	5593369	5600857	Enh_221
1	5658611	5664025	Enh_222
1	5667440	5668243	Enh_223
1	5687677	5689223	Enh_224
1	5716614	5719659	Enh_226
1	5724049	5730186	Enh_227
1	5857917	5859111	Enh_233
1	5877000	5877268	Enh_234
1	5887198	5888587	Enh_236
1	5891930	5892895	Enh_237
1	5900415	5902492	Enh_238
1	5910943	5911976	Enh_239
1	5914781	5916032	Enh_240
1	5927303	5929861	Enh_242
1	5934026	5940263	Enh_243
1	5949610	5951978	Enh_245
1	5965576	5966174	Enh_248
1	5977281	5979111	Enh_251
1	5980309	5980557	Enh_252
1	5985764	5986492	Enh_253
1	5999637	5999839	Enh_254
1	6000715	6003740	Enh_255
1	6005648	6005856	Enh_256
1	6006862	6008281	Enh_257
1	6013128	6013884	Enh_259
1	6016054	6018322	Enh_261
1	6048418	6049873	Enh_262
1	6055362	6061690	Enh_263
1	6071352	6072290	Enh_265
1	6073493	6074501	Enh_266
1	6095204	6095406	Enh_268
1	6096340	6096773	Enh_269
1	6101286	6102575	Enh_272
1	6103929	6104326	Enh_273
1	6109126	6109397	Enh_274
1	6109392	6109798	Enh_275
1	6123746	6130127	Enh_277
1	6142044	6143584	Enh_278
1	6148501	6149136	Enh_279
1	6151782	6163229	Enh_280
1	6164665	6167099	Enh_281
1	6169730	6171998	Enh_282
1	6182852	6184503	Enh_283
1	6185486	6186166	Enh_284
1	6187195	6191192	Enh_285
1	6192391	6192896	Enh_286
1	6216368	6227171	Enh_287
1	6241777	6242184	Enh_288
1	6284696	6304454	Enh_289
1	6313357	6322833	Enh_290
1	6323274	6323461	Enh_291
1	6323874	6328595	Enh_292
1	6329690	6338488	Enh_293
1	6339247	6339727	Enh_294
1	6372121	6375865	Enh_295
1	6378434	6379369	Enh_296
1	6410226	6411576	Enh_297
1	6443228	6451898	Enh_298
1	6454058	6457095	Enh_299
1	6478095	6478292	Enh_300
1	6525274	6528936	Enh_301
1	6534416	6535534	Enh_302
1	6542535	6548494	Enh_304
1	6575863	6577209	Enh_305
1	6591170	6594089	Enh_306
1	6649187	6650521	Enh_307
1	6735301	6736043	Enh_309
1	6742837	6746558	Enh_310
1	6769398	6773418	Enh_312
1	6796162	6796785	Enh_313
1	6798067	6804334	Enh_314
1	6820303	6821963	Enh_315
1	6853880	6854183	Enh_316
1	6859145	6865587	Enh_318
1	6867006	6871371	Enh_319
1	6872874	6873794	Enh_320
1	6879072	6882955	Enh_321
1	6890254	6890514	Enh_322
1	6899212	6899901	Enh_323
1	6905819	6907983	Enh_325
1	6918492	6920261	Enh_326
1	6922222	6925412	Enh_327
1	6925848	6928413	Enh_328
1	6958436	6965550	Enh_329
1	6966888	6969037	Enh_330
1	7042287	7044841	Enh_331
1	7046491	7047539	Enh_332
1	7109664	7110865	Enh_334
1	7115892	7123828	Enh_335
1	7149491	7150241	Enh_336
1	7151097	7151605	Enh_337
1	7198579	7199543	Enh_338
1	7218561	7233670	Enh_339
1	7252631	7256601	Enh_341
1	7261347	7269380	Enh_342
1	7277283	7280708	Enh_343
1	7282036	7283446	Enh_344
1	7283728	7286554	Enh_345
1	7289904	7304005	Enh_346
1	7312224	7313486	Enh_347
1	7326001	7326887	Enh_348
1	7334260	7337249	Enh_349
1	7346800	7347768	Enh_350
1	7367626	7367909	Enh_351
1	7376924	7381068	Enh_352
1	7399105	7410461	Enh_353
1	7418565	7420405	Enh_354
1	7420567	7420942	Enh_355
1	7421752	7422097	Enh_356
1	7427938	7428463	Enh_357
1	7431540	7433893	Enh_358
1	7434747	7441589	Enh_359
1	7444463	7460595	Enh_360
1	7461627	7479729	Enh_361
1	7482783	7484277	Enh_362
1	7485190	7485788	Enh_363
1	7489531	7489824	Enh_364
1	7490354	7492520	Enh_365
1	7505638	7506030	Enh_366
1	7510331	7511103	Enh_367
1	7518939	7520621	Enh_368
1	7524727	7541607	Enh_369
1	7547399	7561147	Enh_370
1	7561622	7561992	Enh_371
1	7569637	7577201	Enh_372
1	7581631	7583991	Enh_373
1	7585466	7586151	Enh_374
1	7587556	7588512	Enh_375
1	7640364	7650247	Enh_376
1	7745660	7746601	Enh_380
1	7752745	7753008	Enh_381
1	7827160	7827499	Enh_382
1	7846202	7848745	Enh_383
1	7885373	7887001	Enh_384
1	7888215	7897816	Enh_385
1	7901909	7903088	Enh_386
1	7912538	7914192	Enh_387
1	7920802	7923677	Enh_388
1	7950946	7958723	Enh_393
1	7973217	7975504	Enh_395
1	7980417	7984573	Enh_396
1	7985687	7986224	Enh_397
1	7987121	7989229	Enh_398
1	7990951	7991762	Enh_399
1	7993685	7994880	Enh_400
1	8086810	8162879	Enh_401
1	8163656	8177502	Enh_402
1	8256507	8261101	Enh_403
1	8269290	8271385	Enh_404
1	8275805	8277643	Enh_406
1	8302162	8303887	Enh_408
1	8323790	8324380	Enh_409
1	8329607	8330686	Enh_410
1	8341703	8354294	Enh_411
1	8355190	8376485	Enh_412
1	8376990	8383498	Enh_413
1	8384053	8385781	Enh_414
1	8389331	8399081	Enh_415
1	8438552	8440782	Enh_417
1	8446861	8451384	Enh_418
1	8454726	8459187	Enh_419
1	8460792	8468678	Enh_420
1	8469841	8471997	Enh_422
1	8480515	8484830	Enh_424
1	8487600	8493327	Enh_425
1	8500827	8501567	Enh_427
1	8507048	8507577	Enh_428
1	8509508	8511859	Enh_429
1	8519867	8521135	Enh_431
1	8521737	8522534	Enh_432
1	8522803	8527954	Enh_433
1	8539438	8541502	Enh_434
1	8548590	8548920	Enh_435
1	8554541	8555586	Enh_436
1	8558836	8559099	Enh_437
1	8571035	8571858	Enh_439
1	8597451	8599505	Enh_441
1	8607825	8610159	Enh_443
1	8623122	8623587	Enh_444
1	8625081	8628123	Enh_445
1	8629278	8629945	Enh_446
1	8632674	8633522	Enh_447
1	8642852	8645114	Enh_448
1	8657677	8666507	Enh_450
1	8669133	8671251	Enh_451
1	8677973	8683405	Enh_453
1	8699707	8716072	Enh_454
1	8720534	8722028	Enh_455
1	8724613	8729496	Enh_456
1	8730333	8730717	Enh_457
1	8731899	8735521	Enh_458
1	8739392	8740358	Enh_459
1	8742359	8742953	Enh_461
1	8764550	8764926	Enh_464
1	8781771	8782500	Enh_465
1	8785481	8799220	Enh_467
1	8801934	8802666	Enh_468
1	8821701	8829770	Enh_469
1	8843730	8849835	Enh_470
1	8966572	8978892	Enh_475
1	8981769	8992531	Enh_477
1	9000335	9006588	Enh_478
1	9036334	9041393	Enh_481
1	9098911	9102170	Enh_483
1	9104537	9106687	Enh_484
1	9142275	9147079	Enh_485
1	9156103	9172803	Enh_486
1	9195401	9202716	Enh_488
1	9203696	9203950	Enh_489
1	9206935	9208464	Enh_490
1	9210760	9211421	Enh_491
1	9262134	9262441	Enh_492
1	9263571	9264865	Enh_493
1	9266111	9267649	Enh_494
1	9268316	9273576	Enh_495
1	9274763	9284047	Enh_496
1	9307814	9335893	Enh_497
1	9336310	9355020	Enh_498
1	9355449	9356419	Enh_499
1	9357669	9379418	Enh_500
1	9380407	9389901	Enh_501
1	9391420	9392818	Enh_502
1	9395848	9408499	Enh_504
1	9457452	9462348	Enh_505
1	9463684	9483470	Enh_506
1	9488610	9491260	Enh_508
1	9493436	9495990	Enh_509
1	9504594	9505974	Enh_510
1	9526447	9527918	Enh_513
1	9528473	9535583	Enh_514
1	9545959	9549226	Enh_515
1	9550765	9563254	Enh_516
1	9565517	9565796	Enh_517
1	9569488	9572100	Enh_518
1	9601398	9603982	Enh_519
1	9605684	9607733	Enh_520
1	9610549	9610813	Enh_521
1	9612169	9612452	Enh_523
1	9612739	9614055	Enh_524
1	9623203	9623980	Enh_525
1	9625814	9633131	Enh_526
1	9642161	9645321	Enh_528
1	9670722	9675109	Enh_530
1	9698986	9704157	Enh_531
1	9704645	9706461	Enh_532
1	9714433	9734081	Enh_534
1	9737182	9738445	Enh_536
1	9744337	9744684	Enh_537
1	9753119	9754522	Enh_539
1	9754538	9755270	Enh_540
1	9755552	9756356	Enh_541
1	9756686	9760249	Enh_542
1	9763475	9770745	Enh_543
1	9775893	9777181	Enh_544
1	9781696	9783963	Enh_545
1	9784244	9784658	Enh_546
1	9784960	9789178	Enh_547
1	9791997	9793655	Enh_548
1	9795692	9800523	Enh_549
1	9804045	9805733	Enh_550
1	9807150	9813161	Enh_551
1	9814695	9817145	Enh_552
1	9832528	9853678	Enh_553
1	9857373	9879369	Enh_554
1	9939806	9940017	Enh_555
1	9948790	9955265	Enh_556
1	10009648	10019149	Enh_562
1	10042935	10043279	Enh_563
1	10043557	10048076	Enh_564
1	10050135	10050617	Enh_565
1	10054877	10070968	Enh_566
1	10070992	10072123	Enh_567
1	10073231	10076556	Enh_568
1	10081570	10085048	Enh_569
1	10105636	10110049	Enh_570
1	10121535	10124396	Enh_571
1	10146680	10147041	Enh_572
1	10169619	10171808	Enh_574
1	10195271	10196069	Enh_575
1	10196075	10197702	Enh_576
1	10213646	10213867	Enh_577
1	10216713	10217562	Enh_579
1	10218049	10218677	Enh_580
1	10250676	10255513	Enh_581
1	10373762	10375297	Enh_585
1	10376532	10382531	Enh_586
1	10383450	10390920	Enh_587
1	10410178	10410535	Enh_588
1	10412606	10424256	Enh_589
1	10424856	10427678	Enh_590
1	10455438	10462193	Enh_591
1	10469627	10470062	Enh_592
1	10482131	10482796	Enh_594
1	10490151	10498191	Enh_596
1	10498510	10498818	Enh_597
1	10503961	10524293	Enh_598
1	10524573	10532443	Enh_599
1	10535196	10538777	Enh_600
1	10550135	10558025	Enh_601
1	10560989	10562196	Enh_602
1	10574626	10575779	Enh_603
1	10576719	10578362	Enh_604
1	10585501	10587418	Enh_605
1	10589215	10601946	Enh_606
1	10605147	10605444	Enh_607
1	10616539	10619670	Enh_609
1	10620494	10621683	Enh_610
1	10810452	10810651	Enh_611
1	10812913	10813488	Enh_612
1	10813796	10833764	Enh_613
1	10834830	10839009	Enh_614
1	10856082	10859107	Enh_615
1	10860871	10861939	Enh_616
1	10863037	10863479	Enh_617
1	10863859	10869761	Enh_618
1	10872979	10873526	Enh_619
1	10887191	10893921	Enh_620
1	10895360	10912615	Enh_621
1	10919420	10920630	Enh_622
1	10933954	10935427	Enh_623
1	10936639	10950546	Enh_624
1	11106798	11107199	Enh_626
1	11108427	11111272	Enh_627
1	11118319	11119459	Enh_628
1	11167530	11182178	Enh_629
1	11196238	11197825	Enh_630
1	11255903	11257277	Enh_632
1	11280815	11283404	Enh_633
1	11304050	11304338	Enh_634
1	11316302	11317614	Enh_635
1	11317685	11347378	Enh_636
1	11350037	11354122	Enh_637
1	11355479	11356301	Enh_638
1	11362218	11362494	Enh_639
1	11374468	11376011	Enh_641
1	11387387	11387695	Enh_642
1	11417715	11418497	Enh_643
1	11420644	11422603	Enh_644
1	11455285	11456428	Enh_645
1	11483040	11489104	Enh_646
1	11522112	11523895	Enh_648
1	11535112	11536460	Enh_649
1	11558733	11560600	Enh_650
1	11563153	11563911	Enh_651
1	11657990	11659316	Enh_652
1	11674751	11676914	Enh_655
1	11676917	11677819	Enh_656
1	11704412	11709467	Enh_657
1	11718558	11723389	Enh_659
1	11745588	11746265	Enh_661
1	11746861	11750301	Enh_662
1	11751014	11752442	Enh_663
1	11766468	11766780	Enh_664
1	11783577	11796787	Enh_666
1	11820474	11823834	Enh_669
1	11838649	11838898	Enh_670
1	11878181	11880507	Enh_671
1	11948645	11950363	Enh_676
1	11952781	11953292	Enh_677
1	11954660	11955426	Enh_678
1	11959801	11975348	Enh_679
1	11987439	11993629	Enh_681
1	11999309	12002715	Enh_682
1	12005561	12005920	Enh_683
1	12007149	12007406	Enh_684
1	12008445	12010460	Enh_685
1	12011644	12013433	Enh_686
1	12033761	12037859	Enh_687
1	12045853	12055421	Enh_689
1	12056392	12057282	Enh_690
1	12066557	12086145	Enh_691
1	12095421	12101079	Enh_693
1	12111459	12114377	Enh_695
1	12124576	12136765	Enh_698
1	12220141	12222912	Enh_699
1	12241970	12247271	Enh_702
1	12271953	12273220	Enh_704
1	12293474	12294446	Enh_707
1	12296105	12297495	Enh_708
1	12308702	12321710	Enh_710
1	12327623	12327883	Enh_711
1	12329326	12330426	Enh_712
1	12341675	12343078	Enh_713
1	12353247	12358866	Enh_716
1	12368311	12369812	Enh_717
1	12375169	12377420	Enh_719
1	12379204	12383867	Enh_720
1	12384125	12387124	Enh_721
1	12397962	12401499	Enh_722
1	12401683	12402656	Enh_723
1	12402799	12403152	Enh_724
1	12404258	12410530	Enh_725
1	12413169	12415378	Enh_726
1	12415885	12416339	Enh_727
1	12422935	12425474	Enh_728
1	12427673	12429567	Enh_729
1	12430607	12442750	Enh_730
1	12443935	12492311	Enh_731
1	12494158	12497786	Enh_732
1	12518864	12519800	Enh_734
1	12524525	12533137	Enh_735
1	12534689	12535051	Enh_736
1	12536948	12561812	Enh_737
1	12563343	12569187	Enh_738
1	12626279	12631820	Enh_739
1	12634546	12638040	Enh_740
1	12650632	12651012	Enh_742
1	12654292	12654621	Enh_743
1	12658093	12658694	Enh_744
1	12676635	12677704	Enh_746
1	12688345	12693636	Enh_747
1	12696275	12698297	Enh_748
1	12705068	12714036	Enh_749
1	12721500	12721757	Enh_750
1	12756234	12759402	Enh_751
1	12807301	12813103	Enh_752
1	13543697	13544039	Enh_755
1	13553761	13554134	Enh_756
1	13555167	13557216	Enh_757
1	13562979	13563992	Enh_758
1	13617440	13621084	Enh_759
1	13658120	13658415	Enh_762
1	13661710	13663413	Enh_763
1	13684099	13684960	Enh_765
1	13722268	13725836	Enh_767
1	13729116	13733687	Enh_768
1	13764684	13769637	Enh_769
1	13798064	13805434	Enh_773
1	13827237	13833698	Enh_775
1	13892724	13893735	Enh_776
1	13946991	13950009	Enh_778
1	14017040	14018780	Enh_779
1	14040400	14040618	Enh_780
1	14054929	14056386	Enh_781
1	14112964	14114376	Enh_782
1	14116335	14116707	Enh_783
1	14135188	14139900	Enh_784
1	14140474	14144242	Enh_785
1	14164652	14166175	Enh_786
1	14180873	14181457	Enh_787
1	14189999	14190717	Enh_788
1	14282463	14283524	Enh_789
1	14290862	14292970	Enh_790
1	14303210	14305670	Enh_791
1	14320990	14321478	Enh_792
1	14332186	14335553	Enh_793
1	14344897	14347521	Enh_794
1	14360576	14363414	Enh_795
1	14390112	14391341	Enh_796
1	14392832	14396676	Enh_797
1	14463987	14466909	Enh_799
1	14476171	14480150	Enh_800
1	14484575	14488988	Enh_801
1	14492141	14492985	Enh_802
1	14497087	14500584	Enh_803
1	14515371	14524441	Enh_804
1	14542838	14543932	Enh_805
1	14552272	14554333	Enh_807
1	14613519	14614793	Enh_808
1	14627337	14629178	Enh_809
1	14650288	14654613	Enh_810
1	14698270	14698565	Enh_811
1	14729189	14745254	Enh_813
1	14753806	14760516	Enh_814
1	14763085	14767936	Enh_815
1	14787782	14792702	Enh_816
1	14793588	14794943	Enh_817
1	14800513	14801620	Enh_818
1	14809031	14816493	Enh_819
1	14821908	14827952	Enh_820
1	14833212	14834335	Enh_821
1	14835442	14837408	Enh_822
1	14848620	14848991	Enh_823
1	14850349	14851185	Enh_824
1	14870249	14872155	Enh_825
1	14875989	14882890	Enh_826
1	14884934	14885236	Enh_827
1	14888059	14902005	Enh_828
1	14903351	14903538	Enh_829
1	14904273	14915547	Enh_830
1	14915580	14915786	Enh_831
1	14934571	14935787	Enh_832
1	14936261	14938445	Enh_833
1	14962474	14972939	Enh_834
1	14974880	14979401	Enh_835
1	14987163	14988780	Enh_837
1	14990381	15004427	Enh_838
1	15007338	15009565	Enh_839
1	15012462	15018900	Enh_840
1	15019150	15032524	Enh_841
1	15033709	15037644	Enh_842
1	15042098	15043252	Enh_843
1	15043972	15044357	Enh_844
1	15045656	15046644	Enh_845
1	15060067	15060548	Enh_846
1	15064489	15066249	Enh_847
1	15072556	15103207	Enh_848
1	15128655	15129787	Enh_849
1	15138790	15143308	Enh_851
1	15145009	15148774	Enh_852
1	15185609	15194117	Enh_853
1	15194396	15211423	Enh_854
1	15212365	15216046	Enh_855
1	15217586	15227732	Enh_856
1	15229414	15232267	Enh_857
1	15256802	15263946	Enh_860
1	15272097	15273046	Enh_862
1	15279316	15287188	Enh_866
1	15288766	15291072	Enh_867
1	15294820	15297631	Enh_868
1	15301015	15301944	Enh_870
1	15302048	15304187	Enh_871
1	15304910	15306826	Enh_872
1	15315746	15316830	Enh_873
1	15322534	15330989	Enh_874
1	15332569	15332881	Enh_875
1	15364698	15365150	Enh_876
1	15366244	15368850	Enh_877
1	15382102	15384152	Enh_879
1	15384373	15385000	Enh_880
1	15486337	15487607	Enh_883
1	15514250	15514460	Enh_884
1	15535422	15535687	Enh_885
1	15537322	15540843	Enh_886
1	15551064	15552198	Enh_887
1	15553344	15554201	Enh_888
1	15556160	15563595	Enh_889
1	15574855	15575330	Enh_890
1	15577707	15580860	Enh_891
1	15598573	15607320	Enh_892
1	15609128	15611049	Enh_893
1	15640985	15644231	Enh_894
1	15645744	15646161	Enh_895
1	15654189	15655870	Enh_896
1	15674108	15676141	Enh_897
1	15688287	15689060	Enh_898
1	15695304	15708014	Enh_900
1	15753392	15754494	Enh_901
1	15779931	15805273	Enh_905
1	15816060	15840911	Enh_906
1	15855116	15855704	Enh_907
1	15857198	15861795	Enh_908
1	15879222	15880946	Enh_913
1	15881449	15889375	Enh_914
1	15891371	15895177	Enh_915
1	15896684	15906667	Enh_916
1	15908494	15908686	Enh_918
1	15914811	15921731	Enh_920
1	15922499	15927089	Enh_921
1	15928358	15930438	Enh_922
1	15932051	15970888	Enh_923
1	15985133	15986983	Enh_924
1	15989213	15995138	Enh_925
1	16038471	16039551	Enh_926
1	16052053	16052290	Enh_927
1	16057208	16063759	Enh_929
1	16064015	16067421	Enh_930
1	16068114	16069308	Enh_931
1	16097820	16098187	Enh_932
1	16100956	16101210	Enh_933
1	16102130	16102600	Enh_934
1	16104372	16105501	Enh_935
1	16195408	16195799	Enh_936
1	16198442	16199893	Enh_937
1	16201144	16202825	Enh_938
1	16215058	16220855	Enh_939
1	16223308	16234692	Enh_940
1	16242638	16243064	Enh_941
1	16243133	16243359	Enh_942
1	16244057	16244506	Enh_943
1	16247014	16251983	Enh_944
1	16254650	16254859	Enh_946
1	16260152	16264922	Enh_948
1	16287533	16288861	Enh_950
1	16291552	16291847	Enh_951
1	16298905	16299993	Enh_953
1	16300968	16301576	Enh_954
1	16315198	16317470	Enh_955
1	16319752	16325382	Enh_957
1	16332558	16336602	Enh_958
1	16400583	16400961	Enh_959
1	16402613	16403286	Enh_960
1	16426754	16427441	Enh_963
1	16451488	16453468	Enh_964
1	16455173	16457090	Enh_965
1	16473738	16474759	Enh_966
1	16478374	16478690	Enh_967
1	16483285	16485516	Enh_968
1	16490557	16490961	Enh_969
1	16497234	16501349	Enh_970
1	16567595	16567789	Enh_971
1	16607450	16609419	Enh_972
1	16618884	16626474	Enh_973
1	16696432	16696849	Enh_974
1	16696869	16703181	Enh_975
1	16703530	16710995	Enh_976
1	16713049	16713384	Enh_977
1	16724827	16725431	Enh_978
1	16748812	16749092	Enh_979
1	16772540	16772850	Enh_980
1	16779691	16782631	Enh_981
1	16796739	16796975	Enh_982
1	16899165	16899578	Enh_983
1	16900828	16908856	Enh_984
1	16910080	16910329	Enh_985
1	16911817	16916867	Enh_986
1	16936415	16940821	Enh_987
1	16946294	16957157	Enh_988
1	16989705	16990008	Enh_989
1	16991304	16993853	Enh_990
1	17020358	17022327	Enh_992
1	17026085	17030912	Enh_993
1	17040359	17042090	Enh_995
1	17043988	17048589	Enh_996
1	17140036	17142571	Enh_998
1	17147179	17150337	Enh_1000
1	17155825	17156833	Enh_1001
1	17160879	17174585	Enh_1002
1	17176405	17176829	Enh_1003
1	17265357	17268035	Enh_1004
1	17312354	17317534	Enh_1005
1	17337987	17342943	Enh_1006
1	17344556	17351847	Enh_1007
1	17355209	17356263	Enh_1008
1	17396739	17420210	Enh_1010
1	17448786	17449380	Enh_1011
1	17451539	17452198	Enh_1013
1	17456640	17456933	Enh_1015
1	17458963	17463303	Enh_1016
1	17464605	17465876	Enh_1017
1	17468164	17470125	Enh_1018
1	17472443	17477447	Enh_1019
1	17477629	17478395	Enh_1020
1	17486555	17494602	Enh_1022
1	17497835	17498707	Enh_1023
1	17600753	17611196	Enh_1024
1	17644718	17649212	Enh_1026
1	17651321	17655020	Enh_1027
1	17660899	17672094	Enh_1030
1	17676565	17690757	Enh_1032
1	17696127	17697737	Enh_1035
1	17719647	17720943	Enh_1036
1	17757767	17781275	Enh_1037
1	17791108	17791368	Enh_1038
1	17797660	17798168	Enh_1039
1	17818302	17820301	Enh_1040
1	17825138	17826930	Enh_1041
1	17838867	17839708	Enh_1042
1	17842800	17843182	Enh_1043
1	17856349	17856786	Enh_1044
1	17858370	17860149	Enh_1045
1	17864345	17870736	Enh_1046
1	17872478	17881215	Enh_1047
1	17890545	17894179	Enh_1048
1	17902547	17905798	Enh_1049
1	18091281	18091975	Enh_1052
1	18128901	18135250	Enh_1054
1	18138436	18146702	Enh_1055
1	18149059	18151099	Enh_1056
1	18155006	18171966	Enh_1057
1	18174882	18175809	Enh_1058
1	18182562	18183218	Enh_1059
1	18188668	18191711	Enh_1060
1	18198611	18203839	Enh_1061
1	18283658	18284155	Enh_1062
1	18295620	18302524	Enh_1063
1	18320196	18320525	Enh_1064
1	18325235	18326839	Enh_1065
1	18343971	18345307	Enh_1066
1	18360912	18369884	Enh_1067
1	18384065	18384580	Enh_1068
1	18406913	18410995	Enh_1069
1	18440152	18441395	Enh_1070
1	18461657	18467418	Enh_1071
1	18470607	18470794	Enh_1072
1	18509547	18512000	Enh_1073
1	18512906	18513978	Enh_1074
1	18531756	18533363	Enh_1075
1	18534618	18541435	Enh_1076
1	18547346	18548849	Enh_1078
1	18550304	18561942	Enh_1079
1	18569782	18570192	Enh_1080
1	18574526	18575582	Enh_1081
1	18577200	18578592	Enh_1083
1	18582009	18583020	Enh_1084
1	18597074	18610661	Enh_1085
1	18612129	18613503	Enh_1086
1	18618866	18619314	Enh_1087
1	18636257	18637037	Enh_1088
1	18637082	18638011	Enh_1089
1	18640423	18652348	Enh_1090
1	18654050	18654620	Enh_1091
1	18655306	18687831	Enh_1092
1	18687890	18691819	Enh_1093
1	18693219	18693789	Enh_1094
1	18698443	18699504	Enh_1095
1	18701563	18705729	Enh_1096
1	18716188	18724571	Enh_1097
1	18726437	18726749	Enh_1098
1	18787379	18791624	Enh_1099
1	18793133	18800615	Enh_1100
1	18800785	18800982	Enh_1101
1	18805342	18806432	Enh_1102
1	18818442	18821940	Enh_1103
1	18867899	18870932	Enh_1104
1	18874607	18875135	Enh_1105
1	18961347	18966833	Enh_1107
1	18971148	18971538	Enh_1108
1	18988478	18990286	Enh_1109
1	18994599	19001260	Enh_1110
1	19003627	19015072	Enh_1111
1	19016803	19017317	Enh_1112
1	19028117	19030579	Enh_1114
1	19031396	19037905	Enh_1115
1	19042548	19047797	Enh_1117
1	19050687	19055272	Enh_1118
1	19056552	19059729	Enh_1119
1	19061432	19077713	Enh_1120
1	19078642	19089464	Enh_1121
1	19090275	19093272	Enh_1122
1	19094795	19096725	Enh_1123
1	19121974	19123383	Enh_1124
1	19147911	19149607	Enh_1126
1	19155912	19158660	Enh_1127
1	19162386	19167130	Enh_1128
1	19198756	19205001	Enh_1130
1	19213685	19214069	Enh_1131
1	19217603	19223597	Enh_1132
1	19227055	19236179	Enh_1133
1	19239896	19241619	Enh_1134
1	19244195	19244618	Enh_1135
1	19268502	19271252	Enh_1136
1	19308045	19308281	Enh_1137
1	19308453	19309286	Enh_1138
1	19326097	19327195	Enh_1139
1	19328507	19331374	Enh_1140
1	19331718	19332249	Enh_1141
1	19332816	19412065	Enh_1142
1	19501206	19516905	Enh_1145
1	19528671	19530535	Enh_1148
1	19547300	19553303	Enh_1149
1	19557400	19566993	Enh_1150
1	19580833	19582354	Enh_1154
1	19615175	19615559	Enh_1158
1	19615814	19620684	Enh_1159
1	19621265	19621668	Enh_1160
1	19625292	19626436	Enh_1162
1	19628122	19630369	Enh_1163
1	19702521	19705225	Enh_1165
1	19710542	19712273	Enh_1166
1	19714903	19716076	Enh_1168
1	19716424	19717824	Enh_1169
1	19723674	19724121	Enh_1170
1	19732320	19740818	Enh_1171
1	19746540	19747237	Enh_1172
1	19750325	19750783	Enh_1173
1	19752113	19778038	Enh_1174
1	19782775	19789294	Enh_1175
1	19792885	19793071	Enh_1176
1	19831147	19832120	Enh_1178
1	19847633	19847839	Enh_1179
1	19859818	19870569	Enh_1180
1	19871954	19873137	Enh_1181
1	19877347	19880368	Enh_1182
1	19891466	19893426	Enh_1184
1	19903494	19904348	Enh_1186
1	19948287	19949601	Enh_1187
1	19967805	19970604	Enh_1188
1	20008545	20011067	Enh_1189
1	20028165	20035639	Enh_1190
1	20036690	20039267	Enh_1191
1	20043795	20044323	Enh_1192
1	20053694	20061474	Enh_1193
1	20062410	20064746	Enh_1194
1	20095286	20114196	Enh_1196
1	20163640	20175099	Enh_1197
1	20191320	20191635	Enh_1198
1	20192508	20195591	Enh_1199
1	20202130	20204134	Enh_1200
1	20206497	20215520	Enh_1201
1	20220900	20222524	Enh_1202
1	20228333	20239227	Enh_1203
1	20248829	20253131	Enh_1204
1	20264781	20267464	Enh_1205
1	20268816	20270366	Enh_1206
1	20278579	20281178	Enh_1207
1	20282596	20284276	Enh_1208
1	20319367	20323426	Enh_1209
1	20325278	20325925	Enh_1210
1	20342211	20344028	Enh_1212
1	20353495	20362291	Enh_1214
1	20365713	20367299	Enh_1215
1	20375087	20375999	Enh_1216
1	20379649	20381361	Enh_1217
1	20397745	20407092	Enh_1218
1	20408788	20414351	Enh_1219
1	20433198	20434435	Enh_1220
1	20435133	20438660	Enh_1221
1	20440771	20441904	Enh_1222
1	20442583	20445892	Enh_1223
1	20457139	20459821	Enh_1224
1	20464265	20468349	Enh_1225
1	20531381	20531843	Enh_1226
1	20575117	20580395	Enh_1228
1	20626584	20627541	Enh_1229
1	20636913	20638250	Enh_1230
1	20654515	20654946	Enh_1232
1	20665799	20666581	Enh_1233
1	20694577	20701619	Enh_1237
1	20743334	20744034	Enh_1238
1	20813432	20814182	Enh_1239
1	20846094	20850189	Enh_1240
1	20881544	20886252	Enh_1241
1	20893373	20893804	Enh_1242
1	20895355	20897875	Enh_1243
1	20941125	20941963	Enh_1244
1	21012312	21013794	Enh_1246
1	21019971	21025909	Enh_1247
1	21034699	21035958	Enh_1248
1	21042185	21043751	Enh_1249
1	21076531	21077924	Enh_1251
1	21081852	21084484	Enh_1252
1	21088776	21089338	Enh_1253
1	21090007	21091622	Enh_1254
1	21097451	21099146	Enh_1255
1	21117205	21118730	Enh_1256
1	21124395	21125505	Enh_1257
1	21148147	21154351	Enh_1258
1	21162580	21167009	Enh_1259
1	21217350	21218611	Enh_1262
1	21225099	21226642	Enh_1263
1	21227990	21229385	Enh_1264
1	21355549	21355916	Enh_1266
1	21361184	21361697	Enh_1267
1	21367726	21369044	Enh_1268
1	21378190	21382011	Enh_1269
1	21384553	21385066	Enh_1270
1	21388051	21388342	Enh_1271
1	21404390	21405546	Enh_1272
1	21450594	21450897	Enh_1273
1	21452843	21454178	Enh_1274
1	21489528	21496501	Enh_1276
1	21499162	21500758	Enh_1277
1	21502607	21502886	Enh_1278
1	21502900	21504190	Enh_1279
1	21534741	21535060	Enh_1282
1	21536723	21538747	Enh_1283
1	21539954	21545572	Enh_1284
1	21546413	21548323	Enh_1285
1	21558855	21559252	Enh_1286
1	21563070	21579133	Enh_1287
1	21659284	21659500	Enh_1288
1	21703429	21706739	Enh_1289
1	21729739	21731589	Enh_1290
1	21761956	21762173	Enh_1291
1	21762468	21768376	Enh_1292
1	21770917	21771180	Enh_1293
1	21771635	21773074	Enh_1294
1	21773872	21777264	Enh_1295
1	21791759	21792437	Enh_1296
1	21799676	21807228	Enh_1297
1	21820966	21824772	Enh_1298
1	21828721	21831942	Enh_1299
1	21833069	21834916	Enh_1300
1	21838485	21839880	Enh_1301
1	21841583	21844605	Enh_1302
1	21845887	21848530	Enh_1303
1	21851500	21876712	Enh_1304
1	21878039	21879313	Enh_1305
1	21880354	21881482	Enh_1306
1	21884510	21888663	Enh_1307
1	21961252	21962311	Enh_1308
1	21963215	21964282	Enh_1309
1	21965221	21967277	Enh_1310
1	21980335	21984305	Enh_1311
1	22005405	22006023	Enh_1312
1	22006324	22008010	Enh_1313
1	22016625	22021289	Enh_1314
1	22056500	22058884	Enh_1315
1	22062864	22063227	Enh_1316
1	22066152	22071528	Enh_1317
1	22072601	22072793	Enh_1318
1	22074059	22074729	Enh_1319
1	22075626	22077423	Enh_1320
1	22089638	22090247	Enh_1322
1	22106322	22109734	Enh_1324
1	22110906	22115577	Enh_1325
1	22116617	22126955	Enh_1326
1	22128311	22129714	Enh_1327
1	22162658	22164488	Enh_1328
1	22177622	22178343	Enh_1329
1	22194273	22197563	Enh_1331
1	22198291	22198748	Enh_1332
1	22204098	22205728	Enh_1333
1	22207703	22211105	Enh_1334
1	22216318	22219623	Enh_1335
1	22221605	22223954	Enh_1336
1	22272458	22278360	Enh_1337
1	22281627	22292107	Enh_1338
1	22295898	22298749	Enh_1339
1	22315412	22315760	Enh_1340
1	22328935	22333571	Enh_1342
1	22342052	22342833	Enh_1343
1	22348165	22351885	Enh_1344
1	22380338	22380972	Enh_1347
1	22387648	22391826	Enh_1348
1	22402755	22404044	Enh_1349
1	22408381	22409032	Enh_1350
1	22410277	22416749	Enh_1351
1	22417243	22417726	Enh_1352
1	22420728	22421261	Enh_1354
1	22428754	22435831	Enh_1355
1	22463300	22476804	Enh_1356
1	22480363	22481191	Enh_1358
1	22486048	22487430	Enh_1359
1	22495477	22505256	Enh_1361
1	22506215	22513141	Enh_1362
1	22543388	22544131	Enh_1363
1	22551107	22560350	Enh_1364
1	22560495	22560793	Enh_1365
1	22584379	22584993	Enh_1366
1	22593390	22593905	Enh_1367
1	22676807	22677489	Enh_1371
1	22679563	22680129	Enh_1372
1	22689292	22691128	Enh_1373
1	22715865	22718192	Enh_1374
1	22730122	22744257	Enh_1375
1	22745161	22757608	Enh_1376
1	22761634	22763747	Enh_1377
1	22768081	22769355	Enh_1378
1	22772000	22780825	Enh_1379
1	22783225	22796887	Enh_1380
1	22800675	22819590	Enh_1381
1	22821353	22837755	Enh_1382
1	22840496	22841763	Enh_1383
1	22869272	22873154	Enh_1384
1	22875251	22880991	Enh_1385
1	22886948	22887637	Enh_1387
1	22916231	22920983	Enh_1388
1	22953142	22953940	Enh_1389
1	22975602	22980671	Enh_1390
1	23002657	23007098	Enh_1391
1	23008518	23014174	Enh_1392
1	23079194	23080238	Enh_1393
1	23085167	23086985	Enh_1394
1	23088577	23088845	Enh_1395
1	23090721	23092754	Enh_1396
1	23096814	23097244	Enh_1397
1	23098266	23107172	Enh_1398
1	23108486	23108769	Enh_1399
1	23108774	23111457	Enh_1400
1	23111865	23132417	Enh_1401
1	23209801	23211172	Enh_1402
1	23211953	23219973	Enh_1403
1	23224612	23226442	Enh_1404
1	23231511	23231780	Enh_1405
1	23240429	23241243	Enh_1406
1	23245030	23245608	Enh_1407
1	23246235	23246995	Enh_1408
1	23256594	23257044	Enh_1409
1	23257538	23257854	Enh_1410
1	23272069	23275430	Enh_1411
1	23276636	23276904	Enh_1412
1	23277243	23279722	Enh_1413
1	23310619	23310905	Enh_1415
1	23328014	23330528	Enh_1416
1	23331971	23332903	Enh_1417
1	23337386	23337810	Enh_1418
1	23391413	23392170	Enh_1421
1	23392868	23397676	Enh_1422
1	23398534	23399482	Enh_1423
1	23399717	23408236	Enh_1424
1	23411753	23412073	Enh_1426
1	23413586	23415687	Enh_1427
1	23430829	23431068	Enh_1428
1	23433088	23439201	Enh_1429
1	23441093	23460192	Enh_1430
1	23462216	23464112	Enh_1431
1	23464922	23466981	Enh_1432
1	23496468	23511019	Enh_1433
1	23512492	23512935	Enh_1434
1	23650466	23652770	Enh_1435
1	23656899	23658598	Enh_1436
1	23661583	23661960	Enh_1437
1	23667102	23667462	Enh_1438
1	23696797	23701514	Enh_1440
1	23704538	23705337	Enh_1441
1	23706180	23708911	Enh_1442
1	23709815	23710032	Enh_1443
1	23718534	23723890	Enh_1444
1	23725006	23730005	Enh_1445
1	23732216	23732773	Enh_1446
1	23751035	23751496	Enh_1447
1	23759015	23759702	Enh_1448
1	23806396	23807931	Enh_1449
1	23809720	23812872	Enh_1450
1	23818185	23820048	Enh_1451
1	23833720	23835505	Enh_1452
1	23837970	23840061	Enh_1453
1	23897363	23897846	Enh_1456
1	23901932	23903346	Enh_1457
1	23915368	23924804	Enh_1458
1	23963173	23968235	Enh_1459
1	23969089	23970151	Enh_1460
1	23995158	23999268	Enh_1461
1	24000440	24005964	Enh_1462
1	24006420	24038188	Enh_1463
1	24043063	24050065	Enh_1464
1	24050166	24051054	Enh_1465
1	24051246	24051652	Enh_1466
1	24052462	24053743	Enh_1467
1	24060215	24061307	Enh_1468
1	24063294	24063774	Enh_1469
1	24064331	24064594	Enh_1470
1	24066857	24069555	Enh_1471
1	24071071	24072870	Enh_1472
1	24081907	24082509	Enh_1473
1	24089292	24103725	Enh_1474
1	24118412	24123118	Enh_1475
1	24128924	24129230	Enh_1476
1	24148725	24153922	Enh_1477
1	24208777	24210947	Enh_1479
1	24213811	24220393	Enh_1480
1	24235947	24237589	Enh_1481
1	24252605	24253531	Enh_1482
1	24264744	24265007	Enh_1484
1	24265589	24267926	Enh_1485
1	24274173	24279365	Enh_1486
1	24281900	24304010	Enh_1487
1	24306180	24313911	Enh_1488
1	24327462	24331008	Enh_1489
1	24336636	24339894	Enh_1490
1	24340485	24348193	Enh_1491
1	24349426	24352970	Enh_1492
1	24353999	24355711	Enh_1493
1	24357442	24358316	Enh_1494
1	24361053	24370315	Enh_1495
1	24370762	24394589	Enh_1496
1	24395503	24395971	Enh_1497
1	24423360	24428841	Enh_1498
1	24434591	24439026	Enh_1499
1	24440340	24444690	Enh_1500
1	24461894	24468395	Enh_1502
1	24471949	24474836	Enh_1503
1	24475635	24477653	Enh_1504
1	24479362	24485965	Enh_1505
1	24533200	24546629	Enh_1506
1	24585148	24585585	Enh_1507
1	24588803	24590049	Enh_1509
1	24591121	24601065	Enh_1510
1	24608297	24610975	Enh_1511
1	24617421	24623434	Enh_1512
1	24631501	24632166	Enh_1513
1	24632547	24634872	Enh_1514
1	24661786	24662054	Enh_1516
1	24672712	24675219	Enh_1517
1	24676197	24686925	Enh_1518
1	24687823	24690411	Enh_1519
1	24692553	24698535	Enh_1520
1	24699658	24733396	Enh_1521
1	24734575	24737189	Enh_1522
1	24751400	24755514	Enh_1523
1	24760564	24772592	Enh_1524
1	24773671	24775012	Enh_1525
1	24776971	24777283	Enh_1526
1	24780909	24781966	Enh_1527
1	24786719	24788061	Enh_1528
1	24792857	24795706	Enh_1530
1	24799273	24804896	Enh_1532
1	24805837	24806874	Enh_1533
1	24809880	24810232	Enh_1534
1	24821796	24824600	Enh_1535
1	24831706	24831934	Enh_1537
1	24847528	24850111	Enh_1538
1	24860765	24878142	Enh_1540
1	24879139	24879739	Enh_1541
1	24889357	24890850	Enh_1543
1	24892175	24907538	Enh_1544
1	24942763	24943249	Enh_1546
1	24946074	24952562	Enh_1547
1	24980634	25001462	Enh_1549
1	25004024	25004800	Enh_1551
1	25037101	25038313	Enh_1553
1	25045441	25046298	Enh_1554
1	25054774	25055457	Enh_1555
1	25056556	25056925	Enh_1556
1	25062898	25063310	Enh_1557
1	25064992	25067247	Enh_1558
1	25080160	25083939	Enh_1559
1	25089494	25091714	Enh_1560
1	25102305	25103785	Enh_1562
1	25106657	25108193	Enh_1563
1	25111892	25112749	Enh_1565
1	25118747	25119874	Enh_1566
1	25121013	25123045	Enh_1567
1	25134825	25136773	Enh_1568
1	25141922	25142933	Enh_1569
1	25145853	25146153	Enh_1570
1	25146173	25147627	Enh_1571
1	25161031	25161327	Enh_1572
1	25165807	25169903	Enh_1574
1	25173567	25175855	Enh_1575
1	25179246	25179486	Enh_1576
1	25180812	25185760	Enh_1577
1	25192995	25203197	Enh_1578
1	25204061	25205019	Enh_1579
1	25218058	25218354	Enh_1580
1	25220621	25221230	Enh_1581
1	25253136	25258448	Enh_1582
1	25259503	25261733	Enh_1583
1	25318293	25322548	Enh_1586
1	25329176	25333506	Enh_1587
1	25334470	25334947	Enh_1588
1	25343511	25345650	Enh_1589
1	25346936	25347516	Enh_1590
1	25348990	25352467	Enh_1591
1	25355876	25362353	Enh_1592
1	25368980	25373025	Enh_1593
1	25435217	25435965	Enh_1595
1	25437221	25441480	Enh_1596
1	25450209	25451927	Enh_1597
1	25458529	25460749	Enh_1598
1	25462241	25462595	Enh_1599
1	25474141	25486633	Enh_1601
1	25493318	25507088	Enh_1602
1	25516990	25519442	Enh_1603
1	25520744	25523564	Enh_1604
1	25529770	25530667	Enh_1605
1	25530946	25531308	Enh_1606
1	25534648	25535383	Enh_1607
1	25537245	25539157	Enh_1608
1	25579469	25582189	Enh_1609
1	25584058	25593195	Enh_1610
1	25601243	25604385	Enh_1611
1	25610532	25611550	Enh_1612
1	25656880	25662948	Enh_1615
1	25669392	25671195	Enh_1616
1	25683397	25684324	Enh_1618
1	25687000	25690390	Enh_1619
1	25693585	25704566	Enh_1620
1	25706167	25713737	Enh_1621
1	25739765	25751639	Enh_1623
1	25752980	25760461	Enh_1624
1	25762958	25767242	Enh_1625
1	25768965	25787543	Enh_1626
1	25803794	25812038	Enh_1627
1	25831980	25833641	Enh_1628
1	25834474	25835814	Enh_1629
1	25836987	25838020	Enh_1630
1	25838914	25839536	Enh_1631
1	25853624	25854055	Enh_1632
1	25909632	25913108	Enh_1633
1	25921635	25924045	Enh_1634
1	25952992	25953252	Enh_1637
1	25958100	25959485	Enh_1638
1	25984473	25986820	Enh_1639
1	26003869	26007836	Enh_1641
1	26031024	26031610	Enh_1642
1	26032171	26032605	Enh_1643
1	26056611	26057590	Enh_1644
1	26059719	26061755	Enh_1645
1	26074496	26088098	Enh_1646
1	26089762	26090993	Enh_1647
1	26092594	26099803	Enh_1648
1	26101650	26103641	Enh_1649
1	26104206	26105343	Enh_1650
1	26137245	26142844	Enh_1651
1	26220388	26223682	Enh_1655
1	26244567	26245494	Enh_1656
1	26253758	26258457	Enh_1657
1	26324507	26326136	Enh_1659
1	26327740	26329570	Enh_1660
1	26330915	26332073	Enh_1661
1	26335474	26340067	Enh_1662
1	26367311	26368804	Enh_1663
1	26383437	26394992	Enh_1664
1	26400912	26402578	Enh_1665
1	26403587	26406114	Enh_1666
1	26452031	26452405	Enh_1668
1	26475949	26477785	Enh_1669
1	26486577	26487237	Enh_1670
1	26487361	26487935	Enh_1671
1	26490732	26503609	Enh_1672
1	26507501	26512271	Enh_1673
1	26521548	26525763	Enh_1674
1	26560532	26561626	Enh_1675
1	26567362	26567744	Enh_1676
1	26580888	26583637	Enh_1677
1	26596399	26596929	Enh_1678
1	26598439	26600795	Enh_1679
1	26602679	26604932	Enh_1680
1	26617378	26629146	Enh_1682
1	26636400	26638326	Enh_1684
1	26660862	26664499	Enh_1686
1	26676576	26678707	Enh_1687
1	26715864	26727080	Enh_1688
1	26727622	26751384	Enh_1689
1	26751943	26758460	Enh_1690
1	26758964	26759477	Enh_1691
1	26766731	26776104	Enh_1692
1	26797691	26802699	Enh_1693
1	26803320	26805761	Enh_1694
1	26808894	26817390	Enh_1695
1	26837501	26843036	Enh_1696
1	26844444	26845773	Enh_1697
1	26876262	26878705	Enh_1698
1	26906010	26908379	Enh_1699
1	26937180	26943111	Enh_1700
1	26943127	26943635	Enh_1701
1	26944331	26952979	Enh_1702
1	26955617	26956091	Enh_1703
1	26986478	26987349	Enh_1704
1	27017746	27018308	Enh_1705
1	27020638	27022500	Enh_1706
1	27025422	27035211	Enh_1707
1	27035806	27036074	Enh_1708
1	27036696	27040156	Enh_1709
1	27041947	27049884	Enh_1710
1	27056033	27067811	Enh_1711
1	27068725	27071532	Enh_1712
1	27190686	27193301	Enh_1713
1	27245631	27249978	Enh_1714
1	27252592	27253301	Enh_1715
1	27270569	27271401	Enh_1716
1	27272226	27273070	Enh_1717
1	27287352	27287980	Enh_1719
1	27288939	27289449	Enh_1720
1	27292131	27293337	Enh_1721
1	27296931	27303007	Enh_1722
1	27306017	27308481	Enh_1723
1	27316618	27319721	Enh_1724
1	27331028	27332700	Enh_1726
1	27333929	27336956	Enh_1727
1	27412423	27423091	Enh_1730
1	27424304	27425267	Enh_1731
1	27426169	27440978	Enh_1732
1	27441080	27441530	Enh_1733
1	27443901	27444724	Enh_1735
1	27445432	27445690	Enh_1737
1	27454488	27456175	Enh_1739
1	27460122	27460856	Enh_1740
1	27467452	27471866	Enh_1742
1	27474795	27475118	Enh_1743
1	27477058	27477665	Enh_1744
1	27480745	27484139	Enh_1745
1	27495473	27510223	Enh_1746
1	27512880	27514445	Enh_1747
1	27515335	27580508	Enh_1748
1	27581505	27583579	Enh_1749
1	27621374	27622112	Enh_1751
1	27645042	27645638	Enh_1753
1	27682248	27687818	Enh_1754
1	27689506	27690291	Enh_1755
1	27695382	27698030	Enh_1756
1	27777708	27778580	Enh_1759
1	27779845	27780547	Enh_1760
1	27783307	27784425	Enh_1761
1	27784496	27791335	Enh_1762
1	27815979	27817871	Enh_1763
1	27854289	27857180	Enh_1767
1	27857515	27870231	Enh_1768
1	27896383	27896886	Enh_1769
1	27903089	27906474	Enh_1770
1	27919441	27920095	Enh_1772
1	27949089	27949385	Enh_1775
1	27964647	27973403	Enh_1776
1	27973755	27975520	Enh_1777
1	27978661	27979602	Enh_1779
1	28028919	28030007	Enh_1782
1	28058785	28060031	Enh_1783
1	28062695	28071275	Enh_1784
1	28078330	28080226	Enh_1786
1	28085196	28085388	Enh_1787
1	28103887	28105455	Enh_1789
1	28106203	28106904	Enh_1790
1	28109573	28116523	Enh_1792
1	28121061	28126737	Enh_1793
1	28127502	28130731	Enh_1794
1	28133425	28137556	Enh_1795
1	28138904	28140547	Enh_1796
1	28142570	28146231	Enh_1797
1	28147266	28165279	Enh_1798
1	28208011	28210859	Enh_1800
1	28213770	28214339	Enh_1801
1	28267185	28268944	Enh_1803
1	28272283	28273742	Enh_1804
1	28280667	28282970	Enh_1805
1	28283720	28289357	Enh_1806
1	28290152	28291059	Enh_1807
1	28295502	28301457	Enh_1808
1	28301529	28301977	Enh_1809
1	28305996	28308845	Enh_1810
1	28312413	28317646	Enh_1811
1	28337232	28337425	Enh_1812
1	28338690	28357306	Enh_1813
1	28390041	28392805	Enh_1814
1	28394215	28395946	Enh_1815
1	28409927	28410385	Enh_1816
1	28416495	28419158	Enh_1817
1	28422109	28423138	Enh_1818
1	28429324	28429546	Enh_1820
1	28433003	28433283	Enh_1821
1	28441719	28443582	Enh_1822
1	28445621	28452596	Enh_1823
1	28455793	28456586	Enh_1824
1	28458272	28459334	Enh_1825
1	28463693	28464078	Enh_1826
1	28470141	28473223	Enh_1827
1	28478555	28483708	Enh_1828
1	28499468	28502967	Enh_1829
1	28535066	28542308	Enh_1830
1	28543451	28545290	Enh_1831
1	28556686	28557021	Enh_1832
1	28557710	28557897	Enh_1833
1	28566506	28567012	Enh_1835
1	28630278	28630826	Enh_1836
1	28653061	28653296	Enh_1838
1	28672898	28676987	Enh_1839
1	28718721	28719424	Enh_1841
1	28719633	28723437	Enh_1842
1	28744514	28745074	Enh_1843
1	28745401	28746676	Enh_1844
1	28750836	28751982	Enh_1845
1	28754487	28754939	Enh_1846
1	28773746	28777117	Enh_1848
1	28782254	28782879	Enh_1849
1	28784904	28785870	Enh_1850
1	28801551	28801752	Enh_1851
1	28803494	28804523	Enh_1852
1	28825581	28826120	Enh_1853
1	28862725	28863430	Enh_1854
1	28893093	28895400	Enh_1855
1	28896254	28896451	Enh_1856
1	28896775	28898818	Enh_1857
1	28921352	28922636	Enh_1858
1	28924249	28930685	Enh_1859
1	28949877	28950468	Enh_1860
1	28964805	28967356	Enh_1862
1	28968809	28976834	Enh_1863
1	28983807	28985270	Enh_1864
1	29002904	29003314	Enh_1865
1	29035615	29036412	Enh_1866
1	29065343	29065958	Enh_1867
1	29067804	29068345	Enh_1868
1	29115303	29115941	Enh_1869
1	29118018	29119143	Enh_1870
1	29141479	29142251	Enh_1871
1	29143793	29150948	Enh_1872
1	29153210	29153711	Enh_1873
1	29156008	29158059	Enh_1874
1	29189326	29194619	Enh_1876
1	29197283	29197708	Enh_1878
1	29200329	29205789	Enh_1879
1	29216197	29219664	Enh_1880
1	29269352	29275813	Enh_1881
1	29278018	29291806	Enh_1882
1	29303883	29304749	Enh_1883
1	29306069	29307505	Enh_1884
1	29310704	29313080	Enh_1885
1	29319051	29322545	Enh_1887
1	29354098	29355767	Enh_1889
1	29413203	29414814	Enh_1890
1	29550339	29550727	Enh_1892
1	29568022	29578232	Enh_1893
1	29579493	29588307	Enh_1894
1	29590155	29595520	Enh_1895
1	29620719	29627557	Enh_1896
1	29637582	29643102	Enh_1897
1	29649294	29652074	Enh_1898
1	29653060	29653364	Enh_1899
1	29672913	29674722	Enh_1900
1	29679961	29680249	Enh_1901
1	29681759	29684340	Enh_1902
1	29684374	29684792	Enh_1903
1	29685443	29690999	Enh_1904
1	29696868	29699462	Enh_1905
1	29701653	29702104	Enh_1906
1	29705274	29714691	Enh_1907
1	29717647	29719845	Enh_1908
1	29731368	29732065	Enh_1910
1	29789091	29791212	Enh_1911
1	29793169	29794259	Enh_1912
1	29799993	29802577	Enh_1913
1	29849783	29853549	Enh_1914
1	29931963	29934607	Enh_1918
1	29944185	29945092	Enh_1919
1	29962555	29963580	Enh_1920
1	29965080	29965512	Enh_1921
1	29973169	29975096	Enh_1922
1	29983865	29986581	Enh_1923
1	30005877	30006340	Enh_1924
1	30009810	30012013	Enh_1925
1	30058501	30060054	Enh_1927
1	30081963	30086846	Enh_1928
1	30189382	30192195	Enh_1930
1	30258466	30260580	Enh_1934
1	30302457	30303237	Enh_1935
1	30335789	30336975	Enh_1936
1	30344661	30347522	Enh_1937
1	30372346	30382239	Enh_1938
1	30405864	30410862	Enh_1939
1	30411561	30424033	Enh_1940
1	30512436	30512699	Enh_1942
1	30521845	30528272	Enh_1943
1	30571045	30572919	Enh_1944
1	30612383	30619987	Enh_1945
1	30646035	30655061	Enh_1947
1	30667808	30670802	Enh_1949
1	30670820	30671188	Enh_1950
1	30677212	30678378	Enh_1952
1	30684709	30686517	Enh_1953
1	30694780	30696036	Enh_1954
1	30697067	30702526	Enh_1955
1	30703669	30705478	Enh_1956
1	30713577	30715439	Enh_1957
1	30727408	30735537	Enh_1958
1	30768112	30770481	Enh_1959
1	30772024	30790801	Enh_1960
1	30792938	30793696	Enh_1961
1	30794783	30802766	Enh_1962
1	30803359	30803638	Enh_1963
1	30805068	30811280	Enh_1964
1	30846125	30848531	Enh_1966
1	30851485	30853849	Enh_1968
1	30855383	30857477	Enh_1969
1	30858119	30859512	Enh_1970
1	30869766	30870869	Enh_1971
1	30875699	30882625	Enh_1973
1	30885540	30890180	Enh_1974
1	30890901	30897076	Enh_1975
1	30898138	30898401	Enh_1976
1	30927967	30931419	Enh_1977
1	30944857	30945262	Enh_1978
1	30955781	30957720	Enh_1980
1	30970804	30972983	Enh_1982
1	30975308	30978881	Enh_1983
1	30981522	30986250	Enh_1985
1	31004564	31009240	Enh_1986
1	31010146	31010939	Enh_1987
1	31012991	31014360	Enh_1988
1	31017959	31018456	Enh_1989
1	31022819	31031138	Enh_1990
1	31031846	31043768	Enh_1991
1	31044819	31050576	Enh_1992
1	31050571	31051020	Enh_1993
1	31051445	31057503	Enh_1994
1	31070532	31072541	Enh_1995
1	31094795	31115839	Enh_1996
1	31119126	31121317	Enh_1997
1	31122836	31123505	Enh_1998
1	31130929	31131659	Enh_1999
1	31134842	31136174	Enh_2000
1	31144709	31145534	Enh_2001
1	31145801	31148058	Enh_2002
1	31150203	31157632	Enh_2003
1	31160973	31164270	Enh_2004
1	31166549	31167318	Enh_2005
1	31169044	31176885	Enh_2006
1	31181555	31183348	Enh_2007
1	31184989	31191108	Enh_2008
1	31195373	31200228	Enh_2009
1	31201577	31205134	Enh_2010
1	31214785	31219604	Enh_2011
1	31226561	31232152	Enh_2012
1	31256868	31266431	Enh_2013
1	31273196	31274511	Enh_2014
1	31276532	31278226	Enh_2015
1	31279226	31279544	Enh_2016
1	31304492	31307903	Enh_2017
1	31325171	31328400	Enh_2018
1	31357292	31359479	Enh_2019
1	31387935	31391597	Enh_2020
1	31393877	31402784	Enh_2021
1	31405616	31408037	Enh_2022
1	31441936	31442599	Enh_2023
1	31444802	31446245	Enh_2024
1	31467829	31485526	Enh_2025
1	31486227	31488771	Enh_2026
1	31502897	31515737	Enh_2027
1	31530540	31531499	Enh_2029
1	31547661	31550887	Enh_2030
1	31561623	31565390	Enh_2031
1	31614710	31614995	Enh_2034
1	31624562	31629272	Enh_2035
1	31630541	31630743	Enh_2036
1	31677238	31678294	Enh_2038
1	31725929	31728191	Enh_2039
1	31730939	31731264	Enh_2040
1	31779163	31780161	Enh_2041
1	31781373	31803424	Enh_2042
1	31829286	31831059	Enh_2044
1	31837351	31839530	Enh_2045
1	31840363	31840603	Enh_2046
1	31841561	31844631	Enh_2047
1	31848318	31849081	Enh_2048
1	31854153	31856692	Enh_2049
1	31871898	31872421	Enh_2050
1	31873693	31879574	Enh_2051
1	31880430	31882312	Enh_2052
1	31888928	31890683	Enh_2054
1	31890896	31891291	Enh_2055
1	31896256	31906374	Enh_2056
1	31950826	31964479	Enh_2057
1	31975894	31979341	Enh_2058
1	31983931	31988545	Enh_2060
1	31990891	31991778	Enh_2061
1	32008632	32010291	Enh_2062
1	32025397	32025752	Enh_2063
1	32027996	32028313	Enh_2064
1	32029770	32033801	Enh_2065
1	32034903	32035584	Enh_2066
1	32089969	32090229	Enh_2068
1	32097983	32103683	Enh_2069
1	32103902	32104911	Enh_2070
1	32113542	32116967	Enh_2071
1	32118537	32125057	Enh_2072
1	32127282	32143469	Enh_2073
1	32144507	32145659	Enh_2074
1	32158740	32160378	Enh_2075
1	32163074	32163490	Enh_2076
1	32171784	32173815	Enh_2078
1	32175209	32175473	Enh_2079
1	32212360	32212994	Enh_2080
1	32214560	32217883	Enh_2081
1	32227734	32229385	Enh_2082
1	32264424	32268880	Enh_2085
1	32297313	32299819	Enh_2086
1	32300611	32301761	Enh_2087
1	32306478	32312184	Enh_2088
1	32400319	32401603	Enh_2092
1	32406247	32407784	Enh_2093
1	32426659	32429699	Enh_2095
1	32441456	32441711	Enh_2096
1	32447127	32449317	Enh_2097
1	32485099	32488159	Enh_2098
1	32492372	32493489	Enh_2099
1	32493899	32495211	Enh_2100
1	32495371	32503495	Enh_2101
1	32520188	32521763	Enh_2102
1	32589607	32591029	Enh_2103
1	32605937	32606628	Enh_2104
1	32611386	32613955	Enh_2106
1	32635601	32638109	Enh_2108
1	32639030	32640599	Enh_2109
1	32656408	32656657	Enh_2110
1	32680731	32685301	Enh_2113
1	32687430	32689149	Enh_2114
1	32786299	32807772	Enh_2115
1	32809841	32811497	Enh_2116
1	32830351	32830795	Enh_2117
1	32857045	32858342	Enh_2118
1	32861891	32862616	Enh_2119
1	32864538	32865535	Enh_2120
1	32875404	32876987	Enh_2121
1	32881538	32882449	Enh_2123
1	32919892	32921263	Enh_2124
1	32924580	32926389	Enh_2125
1	32933003	32944223	Enh_2126
1	32945828	32947006	Enh_2127
1	32947360	32956514	Enh_2128
1	33046980	33064456	Enh_2133
1	33067317	33070982	Enh_2134
1	33072304	33076073	Enh_2135
1	33091212	33103595	Enh_2138
1	33117979	33118250	Enh_2139
1	33119832	33122859	Enh_2140
1	33125142	33130185	Enh_2141
1	33136512	33138123	Enh_2142
1	33140085	33156801	Enh_2143
1	33217246	33224038	Enh_2144
1	33228211	33229466	Enh_2145
1	33232463	33236376	Enh_2146
1	33238527	33246822	Enh_2147
1	33272133	33273589	Enh_2148
1	33275992	33276518	Enh_2149
1	33280090	33281540	Enh_2150
1	33292925	33305200	Enh_2151
1	33305300	33313042	Enh_2152
1	33381845	33391395	Enh_2155
1	33408461	33408789	Enh_2156
1	33408786	33412553	Enh_2157
1	33412653	33413584	Enh_2158
1	33414905	33415395	Enh_2159
1	33420446	33441991	Enh_2160
1	33454137	33464406	Enh_2162
1	33466996	33469592	Enh_2163
1	33500840	33503622	Enh_2164
1	33510681	33513826	Enh_2165
1	33519366	33520379	Enh_2166
1	33564022	33564469	Enh_2167
1	33660083	33660379	Enh_2169
1	33892930	33894535	Enh_2173
1	33965862	33967939	Enh_2174
1	33970211	33973987	Enh_2175
1	33985049	33986901	Enh_2176
1	34111117	34114625	Enh_2178
1	34199611	34199911	Enh_2179
1	34405130	34408393	Enh_2180
1	34687870	34692353	Enh_2182
1	34738913	34742200	Enh_2185
1	34751916	34752195	Enh_2187
1	34771001	34771465	Enh_2188
1	34788983	34789466	Enh_2189
1	34806373	34809656	Enh_2190
1	34824955	34826257	Enh_2191
1	34830876	34833550	Enh_2192
1	34834319	34840842	Enh_2193
1	34842124	34848613	Enh_2194
1	34850685	34856315	Enh_2195
1	34862627	34868514	Enh_2196
1	34885264	34886264	Enh_2197
1	34945760	34947448	Enh_2198
1	34947786	34947983	Enh_2199
1	34969591	34970229	Enh_2200
1	34976478	34977595	Enh_2201
1	35046435	35049673	Enh_2202
1	35062494	35062738	Enh_2203
1	35062795	35063565	Enh_2204
1	35076497	35076919	Enh_2205
1	35083794	35087980	Enh_2206
1	35120769	35122188	Enh_2207
1	35146142	35146517	Enh_2208
1	35161283	35162501	Enh_2209
1	35162662	35162859	Enh_2210
1	35178390	35178664	Enh_2212
1	35185774	35185966	Enh_2213
1	35198170	35199340	Enh_2215
1	35199644	35200276	Enh_2216
1	35201205	35201523	Enh_2217
1	35208682	35209500	Enh_2218
1	35286036	35292714	Enh_2219
1	35297841	35298590	Enh_2220
1	35316285	35324339	Enh_2221
1	35345433	35347139	Enh_2222
1	35408020	35408207	Enh_2223
1	35432850	35433141	Enh_2224
1	35434524	35437336	Enh_2225
1	35438836	35443207	Enh_2226
1	35446699	35458412	Enh_2229
1	35467608	35468673	Enh_2230
1	35469965	35470272	Enh_2231
1	35475442	35477627	Enh_2232
1	35487789	35488976	Enh_2233
1	35495949	35510554	Enh_2235
1	35522665	35524997	Enh_2236
1	35530854	35534508	Enh_2237
1	35535696	35544266	Enh_2238
1	35544631	35545137	Enh_2239
1	35590678	35591092	Enh_2241
1	35593201	35593867	Enh_2242
1	35599822	35607080	Enh_2243
1	35621950	35622262	Enh_2245
1	35650177	35650419	Enh_2246
1	35666366	35667425	Enh_2247
1	35706963	35709389	Enh_2248
1	35726607	35728625	Enh_2249
1	35746926	35749546	Enh_2250
1	35776594	35777350	Enh_2251
1	35835158	35835653	Enh_2253
1	35855060	35856435	Enh_2256
1	35886734	35887085	Enh_2257
1	35887575	35887960	Enh_2258
1	35892760	35894794	Enh_2259
1	35918473	35919298	Enh_2261
1	35921999	35924221	Enh_2262
1	35936021	35936684	Enh_2263
1	35944684	35944947	Enh_2264
1	36007512	36010668	Enh_2266
1	36022252	36025519	Enh_2267
1	36027526	36028126	Enh_2268
1	36033369	36035627	Enh_2269
1	36181116	36190351	Enh_2271
1	36196263	36211152	Enh_2273
1	36211573	36212300	Enh_2274
1	36216643	36218975	Enh_2275
1	36229050	36235016	Enh_2276
1	36236261	36237305	Enh_2277
1	36238720	36252873	Enh_2278
1	36254576	36261640	Enh_2279
1	36262995	36278547	Enh_2280
1	36279370	36282833	Enh_2281
1	36283295	36287883	Enh_2282
1	36289731	36291282	Enh_2283
1	36337487	36363692	Enh_2284
1	36406723	36410651	Enh_2285
1	36457656	36458956	Enh_2286
1	36458963	36459167	Enh_2287
1	36491588	36497192	Enh_2289
1	36511576	36516061	Enh_2290
1	36516713	36517136	Enh_2291
1	36517765	36521736	Enh_2292
1	36527299	36530628	Enh_2293
1	36704037	36706607	Enh_2295
1	36730534	36731026	Enh_2296
1	36736468	36740223	Enh_2297
1	36750948	36757999	Enh_2298
1	36759908	36774375	Enh_2299
1	36832253	36837405	Enh_2300
1	36894497	36894931	Enh_2301
1	36989452	36990452	Enh_2302
1	37071569	37071915	Enh_2303
1	37118843	37122400	Enh_2305
1	37240331	37242406	Enh_2308
1	37447538	37457118	Enh_2310
1	37457917	37459466	Enh_2311
1	37507005	37508439	Enh_2312
1	37508997	37509624	Enh_2313
1	37531154	37539632	Enh_2316
1	37540833	37541205	Enh_2317
1	37549520	37550497	Enh_2318
1	37573911	37580825	Enh_2319
1	37603526	37608991	Enh_2320
1	37612669	37616793	Enh_2321
1	37650459	37651387	Enh_2323
1	37655537	37666457	Enh_2324
1	37697230	37697972	Enh_2329
1	37717780	37726477	Enh_2331
1	37739362	37742209	Enh_2332
1	37744924	37745399	Enh_2333
1	37752214	37754600	Enh_2334
1	37780173	37780740	Enh_2335
1	37797830	37798605	Enh_2336
1	37817752	37818123	Enh_2337
1	37825298	37826371	Enh_2340
1	37844995	37847608	Enh_2341
1	37848958	37855308	Enh_2342
1	37890808	37891014	Enh_2343
1	37894670	37896318	Enh_2344
1	37896722	37896994	Enh_2345
1	37900156	37902537	Enh_2346
1	37905262	37911202	Enh_2347
1	37919667	37920676	Enh_2348
1	37957793	37961612	Enh_2349
1	37974979	37976500	Enh_2350
1	38024513	38032805	Enh_2351
1	38039557	38039845	Enh_2352
1	38053359	38053561	Enh_2354
1	38064094	38065117	Enh_2355
1	38070913	38074650	Enh_2356
1	38113354	38114503	Enh_2357
1	38117197	38118548	Enh_2358
1	38122580	38127720	Enh_2359
1	38132503	38141278	Enh_2360
1	38242939	38244141	Enh_2362
1	38289404	38290006	Enh_2363
1	38419341	38421043	Enh_2364
1	38527541	38527813	Enh_2367
1	38588689	38588992	Enh_2369
1	38736072	38736420	Enh_2370
1	38744711	38747286	Enh_2371
1	38812356	38814500	Enh_2372
1	38815998	38818918	Enh_2373
1	38910162	38912424	Enh_2374
1	38949298	38954371	Enh_2375
1	38955807	38963675	Enh_2376
1	38973319	38975206	Enh_2377
1	38996995	38997464	Enh_2378
1	39000386	39005580	Enh_2379
1	39043685	39045166	Enh_2382
1	39046591	39049412	Enh_2383
1	39059022	39059703	Enh_2384
1	39076383	39077243	Enh_2386
1	39080143	39082744	Enh_2387
1	39089581	39091685	Enh_2389
1	39098143	39098640	Enh_2390
1	39099521	39113989	Enh_2391
1	39114855	39119089	Enh_2392
1	39123410	39139032	Enh_2393
1	39140077	39146248	Enh_2394
1	39146427	39147356	Enh_2395
1	39149973	39208967	Enh_2396
1	39211498	39218126	Enh_2397
1	39219850	39220666	Enh_2398
1	39229585	39239403	Enh_2399
1	39247725	39249129	Enh_2400
1	39253839	39254197	Enh_2402
1	39255898	39260353	Enh_2404
1	39265784	39272448	Enh_2405
1	39274978	39279668	Enh_2406
1	39329995	39331817	Enh_2407
1	39344520	39344774	Enh_2408
1	39345331	39347455	Enh_2409
1	39376989	39379629	Enh_2413
1	39418143	39418812	Enh_2414
1	39433719	39439646	Enh_2418
1	39449681	39453035	Enh_2419
1	39473415	39474295	Enh_2421
1	39477627	39478426	Enh_2422
1	39496682	39502129	Enh_2424
1	39506959	39511132	Enh_2425
1	39523071	39531636	Enh_2426
1	39536853	39544307	Enh_2427
1	39580085	39583023	Enh_2428
1	39584400	39592483	Enh_2429
1	39605714	39607700	Enh_2432
1	39609155	39610900	Enh_2433
1	39643229	39648814	Enh_2435
1	39651018	39653217	Enh_2436
1	39653445	39654794	Enh_2437
1	39662350	39662956	Enh_2438
1	39674543	39677446	Enh_2439
1	39683748	39684150	Enh_2441
1	39728555	39729722	Enh_2443
1	39775291	39775631	Enh_2446
1	39776241	39779366	Enh_2447
1	39786037	39786426	Enh_2448
1	39798491	39802100	Enh_2449
1	39816040	39820638	Enh_2450
1	39826333	39828605	Enh_2451
1	39830168	39834415	Enh_2452
1	39839980	39840373	Enh_2453
1	39842428	39843890	Enh_2454
1	39844283	39846815	Enh_2455
1	39850089	39850523	Enh_2456
1	39851607	39854335	Enh_2457
1	39866789	39871049	Enh_2458
1	39876612	39877097	Enh_2461
1	39877321	39878070	Enh_2462
[truncated: 111,811 more rows]

## Sheet: All superenhancer co-ordinates
Table S2: Consensus Superenhancer Coordinates in 20 kb bins
chromosome	start	end	name
1	895298	915298	Breast_SE_1_1
1	915298	935298	Breast_SE_1_2
1	935298	955298	Breast_SE_1_3
1	955298	975298	Breast_SE_1_4
1	975298	995298	Breast_SE_1_5
1	995298	1015298	Breast_SE_1_6
1	1015298	1035298	Breast_SE_1_7
1	1035298	1055298	Breast_SE_1_8
1	1055298	1075298	Breast_SE_1_9
1	1075298	1095298	Breast_SE_1_10
1	1095298	1115298	Breast_SE_1_11
1	1115298	1135298	Breast_SE_1_12
1	1135298	1155298	Breast_SE_1_13
1	1155298	1175298	Breast_SE_1_14
1	1175298	1195298	Breast_SE_1_15
1	1195298	1215298	Breast_SE_1_16
1	1215298	1235298	Breast_SE_1_17
1	1235298	1255298	Breast_SE_1_18
1	1255298	1275298	Breast_SE_1_19
1	1275298	1295298	Breast_SE_1_20
1	1295298	1315298	Breast_SE_1_21
1	1315298	1335298	Breast_SE_1_22
1	1335298	1355298	Breast_SE_1_23
1	1355298	1375298	Breast_SE_1_24
1	1375298	1395298	Breast_SE_1_25
1	1395298	1415298	Breast_SE_1_26
1	1415298	1435298	Breast_SE_1_27
1	1435298	1455298	Breast_SE_1_28
1	1455298	1475298	Breast_SE_1_29
1	1475298	1495298	Breast_SE_1_30
1	1495298	1515298	Breast_SE_1_31
1	1515298	1535298	Breast_SE_1_32
1	1535298	1555298	Breast_SE_1_33
1	1555298	1575298	Breast_SE_1_34
1	1575298	1595298	Breast_SE_1_35
1	1595298	1615298	Breast_SE_1_36
1	1615298	1635298	Breast_SE_1_37
1	1635298	1655298	Breast_SE_1_38
1	1655298	1675298	Breast_SE_1_39
1	1675298	1695298	Breast_SE_1_40
1	1695298	1715298	Breast_SE_1_41
1	1713986	1733986	Breast_SE_2_1
1	1733986	1753986	Breast_SE_2_2
1	1753986	1773986	Breast_SE_2_3
1	1773986	1793986	Breast_SE_2_4
1	1793986	1813986	Breast_SE_2_5
1	1813986	1833986	Breast_SE_2_6
1	1833986	1853986	Breast_SE_2_7
1	1853986	1873986	Breast_SE_2_8
1	1873986	1893986	Breast_SE_2_9
1	1893986	1913986	Breast_SE_2_10
1	1913986	1933986	Breast_SE_2_11
1	1933986	1953986	Breast_SE_2_12
1	1953986	1973986	Breast_SE_2_13
1	1973986	1993986	Breast_SE_2_14
1	1993986	2013986	Breast_SE_2_15
1	2119037	2139037	Breast_SE_3_1
1	2139037	2159037	Breast_SE_3_2
1	2159037	2179037	Breast_SE_3_3
1	2179037	2199037	Breast_SE_3_4
1	2199037	2219037	Breast_SE_3_5
1	2219037	2239037	Breast_SE_3_6
1	2239037	2259037	Breast_SE_3_7
1	2259037	2279037	Breast_SE_3_8
1	2279037	2299037	Breast_SE_3_9
1	2299037	2319037	Breast_SE_3_10
1	2319037	2339037	Breast_SE_3_11
1	2339037	2359037	Breast_SE_3_12
1	2359037	2379037	Breast_SE_3_13
1	2379037	2399037	Breast_SE_3_14
1	2399037	2419037	Breast_SE_3_15
1	2419037	2439037	Breast_SE_3_16
1	2439037	2459037	Breast_SE_3_17
1	2459037	2479037	Breast_SE_3_18
1	2479037	2499037	Breast_SE_3_19
1	2499037	2519037	Breast_SE_3_20
1	2519037	2539037	Breast_SE_3_21
1	2539037	2559037	Breast_SE_3_22
1	2559037	2579037	Breast_SE_3_23
1	2579037	2599037	Breast_SE_3_24
1	2599037	2619037	Breast_SE_3_25
1	3052991	3072991	Breast_SE_4_1
1	3072991	3092991	Breast_SE_4_2
1	3092991	3112991	Breast_SE_4_3
1	3112991	3132991	Breast_SE_4_4
1	3132991	3152991	Breast_SE_4_5
1	3152991	3172991	Breast_SE_4_6
1	3172991	3192991	Breast_SE_4_7
1	3192991	3212991	Breast_SE_4_8
1	3212991	3232991	Breast_SE_4_9
1	3232991	3252991	Breast_SE_4_10
1	3252991	3272991	Breast_SE_4_11
1	3272991	3292991	Breast_SE_4_12
1	3292991	3312991	Breast_SE_4_13
1	3312991	3332991	Breast_SE_4_14
1	3332991	3352991	Breast_SE_4_15
1	3352991	3372991	Breast_SE_4_16
1	3372991	3392991	Breast_SE_4_17
1	3392991	3412991	Breast_SE_4_18
1	3449793	3469793	Breast_SE_5_1
1	3469793	3489793	Breast_SE_5_2
1	3489793	3509793	Breast_SE_5_3
1	3509793	3529793	Breast_SE_5_4
1	3529793	3549793	Breast_SE_5_5
1	3549793	3569793	Breast_SE_5_6
1	3569793	3589793	Breast_SE_5_7
1	3589793	3609793	Breast_SE_5_8
1	3609793	3629793	Breast_SE_5_9
1	3629793	3649793	Breast_SE_5_10
1	3649793	3669793	Breast_SE_5_11
1	3669793	3689793	Breast_SE_5_12
1	3689793	3709793	Breast_SE_5_13
1	3709793	3729793	Breast_SE_5_14
1	3729793	3749793	Breast_SE_5_15
1	6172309	6192309	Breast_SE_6_1
1	6192309	6212309	Breast_SE_6_2
1	6212309	6232309	Breast_SE_6_3
1	6232309	6252309	Breast_SE_6_4
1	6252309	6272309	Breast_SE_6_5
1	6272309	6292309	Breast_SE_6_6
1	6292309	6312309	Breast_SE_6_7
1	6312309	6332309	Breast_SE_6_8
1	6332309	6352309	Breast_SE_6_9
1	6352309	6372309	Breast_SE_6_10
1	6372309	6392309	Breast_SE_6_11
1	6392309	6412309	Breast_SE_6_12
1	6412309	6432309	Breast_SE_6_13
1	6432309	6452309	Breast_SE_6_14
1	6452309	6472309	Breast_SE_6_15
1	6472309	6492309	Breast_SE_6_16
1	6492309	6512309	Breast_SE_6_17
1	6512309	6532309	Breast_SE_6_18
1	6573178	6593178	Breast_SE_7_1
1	6593178	6613178	Breast_SE_7_2
1	6613178	6633178	Breast_SE_7_3
1	6633178	6653178	Breast_SE_7_4
1	7240099	7260099	Breast_SE_8_1
1	7260099	7280099	Breast_SE_8_2
1	7280099	7300099	Breast_SE_8_3
1	7300099	7320099	Breast_SE_8_4
1	7364340	7384340	Breast_SE_9_1
1	7384340	7404340	Breast_SE_9_2
1	7404340	7424340	Breast_SE_9_3
1	7424340	7444340	Breast_SE_9_4
1	7444340	7464340	Breast_SE_9_5
1	7464340	7484340	Breast_SE_9_6
1	7484340	7504340	Breast_SE_9_7
1	7504340	7524340	Breast_SE_9_8
1	7524340	7544340	Breast_SE_9_9
1	7544340	7564340	Breast_SE_9_10
1	7939281	7959281	Breast_SE_10_1
1	7959281	7979281	Breast_SE_10_2
1	7979281	7999281	Breast_SE_10_3
1	7999281	8019281	Breast_SE_10_4
1	8019281	8039281	Breast_SE_10_5
1	8039281	8059281	Breast_SE_10_6
1	8059281	8079281	Breast_SE_10_7
1	8079281	8099281	Breast_SE_10_8
1	8099281	8119281	Breast_SE_10_9
1	8119281	8139281	Breast_SE_10_10
1	8139281	8159281	Breast_SE_10_11
1	8159281	8179281	Breast_SE_10_12
1	8179281	8199281	Breast_SE_10_13
1	8199281	8219281	Breast_SE_10_14
1	8219281	8239281	Breast_SE_10_15
1	8239281	8259281	Breast_SE_10_16
1	8259281	8279281	Breast_SE_10_17
1	8337266	8357266	Breast_SE_11_1
1	8357266	8377266	Breast_SE_11_2
1	8377266	8397266	Breast_SE_11_3
1	8397266	8417266	Breast_SE_11_4
1	8417266	8437266	Breast_SE_11_5
1	8437266	8457266	Breast_SE_11_6
1	8457266	8477266	Breast_SE_11_7
1	8477266	8497266	Breast_SE_11_8
1	8497266	8517266	Breast_SE_11_9
1	8517266	8537266	Breast_SE_11_10
1	8537266	8557266	Breast_SE_11_11
1	8557266	8577266	Breast_SE_11_12
1	8836971	8856971	Breast_SE_12_1
1	8856971	8876971	Breast_SE_12_2
1	8876971	8896971	Breast_SE_12_3
1	8896971	8916971	Breast_SE_12_4
1	8916971	8936971	Breast_SE_12_5
1	8936971	8956971	Breast_SE_12_6
1	8956971	8976971	Breast_SE_12_7
1	8976971	8996971	Breast_SE_12_8
1	9031476	9051476	Breast_SE_13_1
1	9051476	9071476	Breast_SE_13_2
1	9071476	9091476	Breast_SE_13_3
1	9091476	9111476	Breast_SE_13_4
1	9111476	9131476	Breast_SE_13_5
1	9131476	9151476	Breast_SE_13_6
1	9151476	9171476	Breast_SE_13_7
1	9171476	9191476	Breast_SE_13_8
1	9191476	9211476	Breast_SE_13_9
1	9230702	9250702	Breast_SE_14_1
1	9250702	9270702	Breast_SE_14_2
1	9270702	9290702	Breast_SE_14_3
1	9290702	9310702	Breast_SE_14_4
1	9310702	9330702	Breast_SE_14_5
1	9330702	9350702	Breast_SE_14_6
1	9350702	9370702	Breast_SE_14_7
1	9370702	9390702	Breast_SE_14_8
1	9390702	9410702	Breast_SE_14_9
1	9410702	9430702	Breast_SE_14_10
1	9430702	9450702	Breast_SE_14_11
1	9450702	9470702	Breast_SE_14_12
1	9470702	9490702	Breast_SE_14_13
1	9490702	9510702	Breast_SE_14_14
1	9510702	9530702	Breast_SE_14_15
1	9530702	9550702	Breast_SE_14_16
1	9550702	9570702	Breast_SE_14_17
1	9676872	9696872	Breast_SE_15_1
1	9696872	9716872	Breast_SE_15_2
1	9716872	9736872	Breast_SE_15_3
1	9736872	9756872	Breast_SE_15_4
1	9756872	9776872	Breast_SE_15_5
1	9776872	9796872	Breast_SE_15_6
1	9796872	9816872	Breast_SE_15_7
1	9816872	9836872	Breast_SE_15_8
1	9836872	9856872	Breast_SE_15_9
1	9856872	9876872	Breast_SE_15_10
1	9876872	9896872	Breast_SE_15_11
1	9896872	9916872	Breast_SE_15_12
1	9992695	10012695	Breast_SE_16_1
1	10012695	10032695	Breast_SE_16_2
1	10032695	10052695	Breast_SE_16_3
1	10052695	10072695	Breast_SE_16_4
1	10072695	10092695	Breast_SE_16_5
1	10092695	10112695	Breast_SE_16_6
1	10375556	10395556	Breast_SE_17_1
1	10395556	10415556	Breast_SE_17_2
1	10415556	10435556	Breast_SE_17_3
1	10443212	10463212	Breast_SE_18_1
1	10463212	10483212	Breast_SE_18_2
1	10483212	10503212	Breast_SE_18_3
1	10503212	10523212	Breast_SE_18_4
1	10523212	10543212	Breast_SE_18_5
1	10587142	10607142	Breast_SE_19_1
1	10607142	10627142	Breast_SE_19_2
1	10627142	10647142	Breast_SE_19_3
1	10647142	10667142	Breast_SE_19_4
1	10667142	10687142	Breast_SE_19_5
1	10687142	10707142	Breast_SE_19_6
1	10707142	10727142	Breast_SE_19_7
1	10727142	10747142	Breast_SE_19_8
1	10747142	10767142	Breast_SE_19_9
1	10767142	10787142	Breast_SE_19_10
1	10787142	10807142	Breast_SE_19_11
1	10807142	10827142	Breast_SE_19_12
1	10827142	10847142	Breast_SE_19_13
1	10884569	10904569	Breast_SE_20_1
1	10904569	10924569	Breast_SE_20_2
1	10924569	10944569	Breast_SE_20_3
1	10944569	10964569	Breast_SE_20_4
1	10964569	10984569	Breast_SE_20_5
1	11044385	11064385	Breast_SE_21_1
1	11064385	11084385	Breast_SE_21_2
1	11118022	11138022	Breast_SE_22_1
1	11138022	11158022	Breast_SE_22_2
1	11158022	11178022	Breast_SE_22_3
1	11178022	11198022	Breast_SE_22_4
1	11640631	11660631	Breast_SE_23_1
1	11660631	11680631	Breast_SE_23_2
1	11680631	11700631	Breast_SE_23_3
1	11700631	11720631	Breast_SE_23_4
1	11720631	11740631	Breast_SE_23_5
1	11740631	11760631	Breast_SE_23_6
1	11777403	11797403	Breast_SE_24_1
1	11797403	11817403	Breast_SE_24_2
1	11817403	11837403	Breast_SE_24_3
1	11884764	11904764	Breast_SE_25_1
1	11904764	11924764	Breast_SE_25_2
1	11924764	11944764	Breast_SE_25_3
1	11944764	11964764	Breast_SE_25_4
1	11964764	11984764	Breast_SE_25_5
1	11984764	12004764	Breast_SE_25_6
1	12101090	12121090	Breast_SE_26_1
1	12121090	12141090	Breast_SE_26_2
1	12141090	12161090	Breast_SE_26_3
1	12161090	12181090	Breast_SE_26_4
1	12181090	12201090	Breast_SE_26_5
1	12201090	12221090	Breast_SE_26_6
1	12221090	12241090	Breast_SE_26_7
1	12241090	12261090	Breast_SE_26_8
1	12336773	12356773	Breast_SE_27_1
1	12356773	12376773	Breast_SE_27_2
1	12376773	12396773	Breast_SE_27_3
1	12396773	12416773	Breast_SE_27_4
1	12416773	12436773	Breast_SE_27_5
1	12436773	12456773	Breast_SE_27_6
1	12456773	12476773	Breast_SE_27_7
1	12476773	12496773	Breast_SE_27_8
1	12496773	12516773	Breast_SE_27_9
1	12516773	12536773	Breast_SE_27_10
1	12536773	12556773	Breast_SE_27_11
1	12556773	12576773	Breast_SE_27_12
1	12576773	12596773	Breast_SE_27_13
1	12596773	12616773	Breast_SE_27_14
1	12616773	12636773	Breast_SE_27_15
1	12636773	12656773	Breast_SE_27_16
1	13573647	13593647	Breast_SE_28_1
1	13593647	13613647	Breast_SE_28_2
1	13613647	13633647	Breast_SE_28_3
1	13740826	13760826	Breast_SE_29_1
1	13760826	13780826	Breast_SE_29_2
1	13780826	13800826	Breast_SE_29_3
1	13800826	13820826	Breast_SE_29_4
1	14869445	14889445	Breast_SE_30_1
1	14889445	14909445	Breast_SE_30_2
1	14909445	14929445	Breast_SE_30_3
1	14929445	14949445	Breast_SE_30_4
1	14949445	14969445	Breast_SE_30_5
1	14969445	14989445	Breast_SE_30_6
1	14989445	15009445	Breast_SE_30_7
1	15009445	15029445	Breast_SE_30_8
1	15029445	15049445	Breast_SE_30_9
1	15070371	15090371	Breast_SE_31_1
1	15090371	15110371	Breast_SE_31_2
1	15122919	15142919	Breast_SE_32_1
1	15142919	15162919	Breast_SE_32_2
1	15162919	15182919	Breast_SE_32_3
1	15182919	15202919	Breast_SE_32_4
1	15202919	15222919	Breast_SE_32_5
1	15222919	15242919	Breast_SE_32_6
1	15242919	15262919	Breast_SE_32_7
1	15262919	15282919	Breast_SE_32_8
1	15315639	15335639	Breast_SE_33_1
1	15335639	15355639	Breast_SE_33_2
1	15355639	15375639	Breast_SE_33_3
1	15400095	15420095	Breast_SE_34_1
1	15420095	15440095	Breast_SE_34_2
1	15591530	15611530	Breast_SE_35_1
1	15611530	15631530	Breast_SE_35_2
1	15631530	15651530	Breast_SE_35_3
1	15666394	15686394	Breast_SE_36_1
1	15686394	15706394	Breast_SE_36_2
1	15706394	15726394	Breast_SE_36_3
1	15726394	15746394	Breast_SE_36_4
1	15746394	15766394	Breast_SE_36_5
1	15766394	15786394	Breast_SE_36_6
1	15786394	15806394	Breast_SE_36_7
1	15806394	15826394	Breast_SE_36_8
1	15826394	15846394	Breast_SE_36_9
1	15846394	15866394	Breast_SE_36_10
1	15866394	15886394	Breast_SE_36_11
1	15886394	15906394	Breast_SE_36_12
1	15906394	15926394	Breast_SE_36_13
1	15926394	15946394	Breast_SE_36_14
1	15946394	15966394	Breast_SE_36_15
1	15966394	15986394	Breast_SE_36_16
1	15985388	16005388	Breast_SE_37_1
1	16005388	16025388	Breast_SE_37_2
1	16025388	16045388	Breast_SE_37_3
1	16045388	16065388	Breast_SE_37_4
1	16065388	16085388	Breast_SE_37_5
1	16085388	16105388	Breast_SE_37_6
1	16105388	16125388	Breast_SE_37_7
1	16125388	16145388	Breast_SE_37_8
1	16145388	16165388	Breast_SE_37_9
1	16165388	16185388	Breast_SE_37_10
1	16185388	16205388	Breast_SE_37_11
1	16205388	16225388	Breast_SE_37_12
1	16225388	16245388	Breast_SE_37_13
1	16245388	16265388	Breast_SE_37_14
1	16265388	16285388	Breast_SE_37_15
1	16285388	16305388	Breast_SE_37_16
1	16305388	16325388	Breast_SE_37_17
1	16325388	16345388	Breast_SE_37_18
1	16345388	16365388	Breast_SE_37_19
1	16365388	16385388	Breast_SE_37_20
1	16385388	16405388	Breast_SE_37_21
1	16607085	16627085	Breast_SE_38_1
1	16627085	16647085	Breast_SE_38_2
1	16880414	16900414	Breast_SE_39_1
1	16900414	16920414	Breast_SE_39_2
1	16920414	16940414	Breast_SE_39_3
1	16940414	16960414	Breast_SE_39_4
1	16960414	16980414	Breast_SE_39_5
1	16980414	17000414	Breast_SE_39_6
1	17000414	17020414	Breast_SE_39_7
1	17020414	17040414	Breast_SE_39_8
1	17045073	17065073	Breast_SE_40_1
1	17065073	17085073	Breast_SE_40_2
1	17085073	17105073	Breast_SE_40_3
1	17105073	17125073	Breast_SE_40_4
1	17125073	17145073	Breast_SE_40_5
1	17145073	17165073	Breast_SE_40_6
1	17165073	17185073	Breast_SE_40_7
1	17185073	17205073	Breast_SE_40_8
1	17205073	17225073	Breast_SE_40_9
1	17225073	17245073	Breast_SE_40_10
1	17245073	17265073	Breast_SE_40_11
1	17265073	17285073	Breast_SE_40_12
1	17285073	17305073	Breast_SE_40_13
1	17305073	17325073	Breast_SE_40_14
1	17368699	17388699	Breast_SE_41_1
1	17388699	17408699	Breast_SE_41_2
1	17408699	17428699	Breast_SE_41_3
1	17428699	17448699	Breast_SE_41_4
1	17448699	17468699	Breast_SE_41_5
1	17482473	17502473	Breast_SE_42_1
1	17502473	17522473	Breast_SE_42_2
1	17522473	17542473	Breast_SE_42_3
1	17542473	17562473	Breast_SE_42_4
1	17562473	17582473	Breast_SE_42_5
1	17582473	17602473	Breast_SE_42_6
1	17602473	17622473	Breast_SE_42_7
1	17622473	17642473	Breast_SE_42_8
1	17642473	17662473	Breast_SE_42_9
1	17662473	17682473	Breast_SE_42_10
1	17682473	17702473	Breast_SE_42_11
1	17737324	17757324	Breast_SE_43_1
1	17757324	17777324	Breast_SE_43_2
1	17777324	17797324	Breast_SE_43_3
1	17840198	17860198	Breast_SE_44_1
1	17860198	17880198	Breast_SE_44_2
1	18456803	18476803	Breast_SE_45_1
1	18476803	18496803	Breast_SE_45_2
1	18866154	18886154	Breast_SE_46_1
1	18886154	18906154	Breast_SE_46_2
1	18906154	18926154	Breast_SE_46_3
1	18926154	18946154	Breast_SE_46_4
1	18946154	18966154	Breast_SE_46_5
1	18966154	18986154	Breast_SE_46_6
1	18986154	19006154	Breast_SE_46_7
1	19006154	19026154	Breast_SE_46_8
1	19022375	19042375	Breast_SE_47_1
1	19042375	19062375	Breast_SE_47_2
1	19062375	19082375	Breast_SE_47_3
1	19082375	19102375	Breast_SE_47_4
1	19196182	19216182	Breast_SE_48_1
1	19216182	19236182	Breast_SE_48_2
1	19236182	19256182	Breast_SE_48_3
1	19299290	19319290	Breast_SE_49_1
1	19319290	19339290	Breast_SE_49_2
1	19339290	19359290	Breast_SE_49_3
1	19359290	19379290	Breast_SE_49_4
1	19379290	19399290	Breast_SE_49_5
1	19399290	19419290	Breast_SE_49_6
1	19419290	19439290	Breast_SE_49_7
1	19439290	19459290	Breast_SE_49_8
1	19459290	19479290	Breast_SE_49_9
1	19479290	19499290	Breast_SE_49_10
1	19499290	19519290	Breast_SE_49_11
1	19519290	19539290	Breast_SE_49_12
1	19609594	19629594	Breast_SE_50_1
1	19629594	19649594	Breast_SE_50_2
1	19649594	19669594	Breast_SE_50_3
1	19744660	19764660	Breast_SE_51_1
1	19764660	19784660	Breast_SE_51_2
1	19784660	19804660	Breast_SE_51_3
1	19804660	19824660	Breast_SE_51_4
1	20140135	20160135	Breast_SE_52_1
1	20160135	20180135	Breast_SE_52_2
1	20180135	20200135	Breast_SE_52_3
1	20200135	20220135	Breast_SE_52_4
1	20220135	20240135	Breast_SE_52_5
1	20466593	20486593	Breast_SE_53_1
1	20486593	20506593	Breast_SE_53_2
1	20506593	20526593	Breast_SE_53_3
1	20567838	20587838	Breast_SE_54_1
1	20587838	20607838	Breast_SE_54_2
1	20607838	20627838	Breast_SE_54_3
1	20627838	20647838	Breast_SE_54_4
1	20708802	20728802	Breast_SE_55_1
1	20728802	20748802	Breast_SE_55_2
1	21212925	21232925	Breast_SE_56_1
1	21232925	21252925	Breast_SE_56_2
1	21252925	21272925	Breast_SE_56_3
1	21272925	21292925	Breast_SE_56_4
1	21292925	21312925	Breast_SE_56_5
1	21312925	21332925	Breast_SE_56_6
1	21332925	21352925	Breast_SE_56_7
1	21352925	21372925	Breast_SE_56_8
1	21485034	21505034	Breast_SE_57_1
1	21505034	21525034	Breast_SE_57_2
1	21525034	21545034	Breast_SE_57_3
1	21539664	21559664	Breast_SE_58_1
1	21559664	21579664	Breast_SE_58_2
1	21579664	21599664	Breast_SE_58_3
1	21599664	21619664	Breast_SE_58_4
1	21619664	21639664	Breast_SE_58_5
1	21639664	21659664	Breast_SE_58_6
1	21659664	21679664	Breast_SE_58_7
1	21757196	21777196	Breast_SE_59_1
1	21777196	21797196	Breast_SE_59_2
1	21805396	21825396	Breast_SE_60_1
1	21825396	21845396	Breast_SE_60_2
1	21845396	21865396	Breast_SE_60_3
1	21865396	21885396	Breast_SE_60_4
1	21885396	21905396	Breast_SE_60_5
1	21905396	21925396	Breast_SE_60_6
1	21925396	21945396	Breast_SE_60_7
1	21945396	21965396	Breast_SE_60_8
1	21965396	21985396	Breast_SE_60_9
1	21985396	22005396	Breast_SE_60_10
1	22005396	22025396	Breast_SE_60_11
1	22025396	22045396	Breast_SE_60_12
1	22045396	22065396	Breast_SE_60_13
1	22065396	22085396	Breast_SE_60_14
1	22410330	22430330	Breast_SE_61_1
1	22430330	22450330	Breast_SE_61_2
1	22450330	22470330	Breast_SE_61_3
1	22470330	22490330	Breast_SE_61_4
1	22490330	22510330	Breast_SE_61_5
1	22726274	22746274	Breast_SE_62_1
1	22746274	22766274	Breast_SE_62_2
1	22766274	22786274	Breast_SE_62_3
1	22786274	22806274	Breast_SE_62_4
1	22806274	22826274	Breast_SE_62_5
1	22826274	22846274	Breast_SE_62_6
1	22846274	22866274	Breast_SE_62_7
1	22866274	22886274	Breast_SE_62_8
1	23096017	23116017	Breast_SE_63_1
1	23116017	23136017	Breast_SE_63_2
1	23154670	23174670	Breast_SE_64_1
1	23174670	23194670	Breast_SE_64_2
1	23194670	23214670	Breast_SE_64_3
1	23214670	23234670	Breast_SE_64_4
1	23323551	23343551	Breast_SE_65_1
1	23343551	23363551	Breast_SE_65_2
1	23363551	23383551	Breast_SE_65_3
1	23383551	23403551	Breast_SE_65_4
1	23403551	23423551	Breast_SE_65_5
1	23423551	23443551	Breast_SE_65_6
1	23443551	23463551	Breast_SE_65_7
1	23463551	23483551	Breast_SE_65_8
1	23483551	23503551	Breast_SE_65_9
1	23503551	23523551	Breast_SE_65_10
1	23523551	23543551	Breast_SE_65_11
1	23543551	23563551	Breast_SE_65_12
1	23563551	23583551	Breast_SE_65_13
1	23583551	23603551	Breast_SE_65_14
1	23603551	23623551	Breast_SE_65_15
1	23623551	23643551	Breast_SE_65_16
1	23772988	23792988	Breast_SE_66_1
1	23792988	23812988	Breast_SE_66_2
1	23939876	23959876	Breast_SE_67_1
1	23959876	23979876	Breast_SE_67_2
1	23979876	23999876	Breast_SE_67_3
1	23999876	24019876	Breast_SE_67_4
1	24019876	24039876	Breast_SE_67_5
1	24039876	24059876	Breast_SE_67_6
1	24064526	24084526	Breast_SE_68_1
1	24084526	24104526	Breast_SE_68_2
1	24104526	24124526	Breast_SE_68_3
1	24258440	24278440	Breast_SE_69_1
1	24278440	24298440	Breast_SE_69_2
1	24298440	24318440	Breast_SE_69_3
1	24318440	24338440	Breast_SE_69_4
1	24361195	24381195	Breast_SE_70_1
1	24381195	24401195	Breast_SE_70_2
1	24401195	24421195	Breast_SE_70_3
1	24527731	24547731	Breast_SE_71_1
1	24547731	24567731	Breast_SE_71_2
1	24567731	24587731	Breast_SE_71_3
1	24587731	24607731	Breast_SE_71_4
1	24607731	24627731	Breast_SE_71_5
1	24634959	24654959	Breast_SE_72_1
1	24654959	24674959	Breast_SE_72_2
1	24674959	24694959	Breast_SE_72_3
1	24694959	24714959	Breast_SE_72_4
1	24714959	24734959	Breast_SE_72_5
1	24734959	24754959	Breast_SE_72_6
1	24754959	24774959	Breast_SE_72_7
1	24774959	24794959	Breast_SE_72_8
1	24794959	24814959	Breast_SE_72_9
1	24814959	24834959	Breast_SE_72_10
1	24845007	24865007	Breast_SE_73_1
1	24865007	24885007	Breast_SE_73_2
1	24885007	24905007	Breast_SE_73_3
1	24905007	24925007	Breast_SE_73_4
1	24925007	24945007	Breast_SE_73_5
1	24945007	24965007	Breast_SE_73_6
1	24965007	24985007	Breast_SE_73_7
1	24985007	25005007	Breast_SE_73_8
1	25005007	25025007	Breast_SE_73_9
1	25025007	25045007	Breast_SE_73_10
1	25045007	25065007	Breast_SE_73_11
1	25065007	25085007	Breast_SE_73_12
1	25085007	25105007	Breast_SE_73_13
1	25105007	25125007	Breast_SE_73_14
1	25133714	25153714	Breast_SE_74_1
1	25153714	25173714	Breast_SE_74_2
1	25173714	25193714	Breast_SE_74_3
1	25193714	25213714	Breast_SE_74_4
1	25229104	25249104	Breast_SE_75_1
1	25249104	25269104	Breast_SE_75_2
1	25468341	25488341	Breast_SE_76_1
1	25488341	25508341	Breast_SE_76_2
1	25508341	25528341	Breast_SE_76_3
1	25528341	25548341	Breast_SE_76_4
1	25548341	25568341	Breast_SE_76_5
1	25568341	25588341	Breast_SE_76_6
1	25588341	25608341	Breast_SE_76_7
1	25608341	25628341	Breast_SE_76_8
1	25722648	25742648	Breast_SE_77_1
1	25742648	25762648	Breast_SE_77_2
1	25762648	25782648	Breast_SE_77_3
1	25782648	25802648	Breast_SE_77_4
1	25802648	25822648	Breast_SE_77_5
1	25822648	25842648	Breast_SE_77_6
1	25848603	25868603	Breast_SE_78_1
1	25868603	25888603	Breast_SE_78_2
1	25888603	25908603	Breast_SE_78_3
1	25908603	25928603	Breast_SE_78_4
1	25987852	26007852	Breast_SE_79_1
1	26007852	26027852	Breast_SE_79_2
1	26027852	26047852	Breast_SE_79_3
1	26047852	26067852	Breast_SE_79_4
1	26067852	26087852	Breast_SE_79_5
1	26087852	26107852	Breast_SE_79_6
1	26107852	26127852	Breast_SE_79_7
1	26127852	26147852	Breast_SE_79_8
1	26262078	26282078	Breast_SE_80_1
1	26282078	26302078	Breast_SE_80_2
1	26302078	26322078	Breast_SE_80_3
1	26322078	26342078	Breast_SE_80_4
1	26342078	26362078	Breast_SE_80_5
1	26362078	26382078	Breast_SE_80_6
1	26382078	26402078	Breast_SE_80_7
1	26402078	26422078	Breast_SE_80_8
1	26422078	26442078	Breast_SE_80_9
1	26461785	26481785	Breast_SE_81_1
1	26481785	26501785	Breast_SE_81_2
1	26501785	26521785	Breast_SE_81_3
1	26521785	26541785	Breast_SE_81_4
1	26541785	26561785	Breast_SE_81_5
1	26561785	26581785	Breast_SE_81_6
1	26613183	26633183	Breast_SE_82_1
1	26633183	26653183	Breast_SE_82_2
1	26670668	26690668	Breast_SE_83_1
1	26690668	26710668	Breast_SE_83_2
1	26710668	26730668	Breast_SE_83_3
1	26730668	26750668	Breast_SE_83_4
1	26750668	26770668	Breast_SE_83_5
1	26770668	26790668	Breast_SE_83_6
1	26790668	26810668	Breast_SE_83_7
1	26810668	26830668	Breast_SE_83_8
1	26830668	26850668	Breast_SE_83_9
1	26850668	26870668	Breast_SE_83_10
1	26870668	26890668	Breast_SE_83_11
1	26890668	26910668	Breast_SE_83_12
1	26910668	26930668	Breast_SE_83_13
1	26941486	26961486	Breast_SE_84_1
1	26961486	26981486	Breast_SE_84_2
1	26981486	27001486	Breast_SE_84_3
1	27001486	27021486	Breast_SE_84_4
1	27021486	27041486	Breast_SE_84_5
1	27041486	27061486	Breast_SE_84_6
1	27061486	27081486	Breast_SE_84_7
1	27080585	27100585	Breast_SE_85_1
1	27100585	27120585	Breast_SE_85_2
1	27120585	27140585	Breast_SE_85_3
1	27140585	27160585	Breast_SE_85_4
1	27160585	27180585	Breast_SE_85_5
1	27293977	27313977	Breast_SE_86_1
1	27313977	27333977	Breast_SE_86_2
1	27333977	27353977	Breast_SE_86_3
1	27353977	27373977	Breast_SE_86_4
1	27373977	27393977	Breast_SE_86_5
1	27393977	27413977	Breast_SE_86_6
1	27413977	27433977	Breast_SE_86_7
1	27433977	27453977	Breast_SE_86_8
1	27453977	27473977	Breast_SE_86_9
1	27473977	27493977	Breast_SE_86_10
1	27493977	27513977	Breast_SE_86_11
1	27513977	27533977	Breast_SE_86_12
1	27533977	27553977	Breast_SE_86_13
1	27553977	27573977	Breast_SE_86_14
1	27573977	27593977	Breast_SE_86_15
1	27593977	27613977	Breast_SE_86_16
1	27613977	27633977	Breast_SE_86_17
1	27633977	27653977	Breast_SE_86_18
1	27653977	27673977	Breast_SE_86_19
1	27673977	27693977	Breast_SE_86_20
1	27842740	27862740	Breast_SE_87_1
1	27862740	27882740	Breast_SE_87_2
1	27882740	27902740	Breast_SE_87_3
1	27902740	27922740	Breast_SE_87_4
1	27955260	27975260	Breast_SE_88_1
1	28074331	28094331	Breast_SE_89_1
1	28094331	28114331	Breast_SE_89_2
1	28114331	28134331	Breast_SE_89_3
1	28134331	28154331	Breast_SE_89_4
1	28154331	28174331	Breast_SE_89_5
1	28174331	28194331	Breast_SE_89_6
1	28194331	28214331	Breast_SE_89_7
1	28226621	28246621	Breast_SE_90_1
1	28246621	28266621	Breast_SE_90_2
1	28266621	28286621	Breast_SE_90_3
1	28276571	28296571	Breast_SE_91_1
1	28296571	28316571	Breast_SE_91_2
1	28316571	28336571	Breast_SE_91_3
1	28336571	28356571	Breast_SE_91_4
1	28356571	28376571	Breast_SE_91_5
1	28376571	28396571	Breast_SE_91_6
1	28396571	28416571	Breast_SE_91_7
1	28471348	28491348	Breast_SE_92_1
1	28491348	28511348	Breast_SE_92_2
1	28511348	28531348	Breast_SE_92_3
1	28531348	28551348	Breast_SE_92_4
1	28551348	28571348	Breast_SE_92_5
1	28571348	28591348	Breast_SE_92_6
1	28591348	28611348	Breast_SE_92_7
1	29106187	29126187	Breast_SE_93_1
1	29126187	29146187	Breast_SE_93_2
1	29146187	29166187	Breast_SE_93_3
1	29172107	29192107	Breast_SE_94_1
1	29192107	29212107	Breast_SE_94_2
1	29212107	29232107	Breast_SE_94_3
1	29232107	29252107	Breast_SE_94_4
1	29252107	29272107	Breast_SE_94_5
1	29272107	29292107	Breast_SE_94_6
1	29664657	29684657	Breast_SE_95_1
1	29684657	29704657	Breast_SE_95_2
1	29704657	29724657	Breast_SE_95_3
1	30691677	30711677	Breast_SE_96_1
1	30711677	30731677	Breast_SE_96_2
1	30731677	30751677	Breast_SE_96_3
1	30751677	30771677	Breast_SE_96_4
1	30771677	30791677	Breast_SE_96_5
1	30791677	30811677	Breast_SE_96_6
1	30811677	30831677	Breast_SE_96_7
1	30868597	30888597	Breast_SE_97_1
1	30888597	30908597	Breast_SE_97_2
1	30908597	30928597	Breast_SE_97_3
1	30928597	30948597	Breast_SE_97_4
1	30959841	30979841	Breast_SE_98_1
1	30979841	30999841	Breast_SE_98_2
1	30999841	31019841	Breast_SE_98_3
1	31019841	31039841	Breast_SE_98_4
1	31039841	31059841	Breast_SE_98_5
1	31059841	31079841	Breast_SE_98_6
1	31364821	31384821	Breast_SE_99_1
1	31384821	31404821	Breast_SE_99_2
1	31404821	31424821	Breast_SE_99_3
1	31424821	31444821	Breast_SE_99_4
1	31456638	31476638	Breast_SE_100_1
1	31476638	31496638	Breast_SE_100_2
1	31541877	31561877	Breast_SE_101_1
1	31561877	31581877	Breast_SE_101_2
1	31581877	31601877	Breast_SE_101_3
1	31605062	31625062	Breast_SE_102_1
1	31625062	31645062	Breast_SE_102_2
1	31645062	31665062	Breast_SE_102_3
1	31665062	31685062	Breast_SE_102_4
1	31685062	31705062	Breast_SE_102_5
1	31705062	31725062	Breast_SE_102_6
1	31725062	31745062	Breast_SE_102_7
1	31745062	31765062	Breast_SE_102_8
1	31765062	31785062	Breast_SE_102_9
1	31785062	31805062	Breast_SE_102_10
1	31805062	31825062	Breast_SE_102_11
1	31871891	31891891	Breast_SE_103_1
1	31891891	31911891	Breast_SE_103_2
1	31911891	31931891	Breast_SE_103_3
1	31931891	31951891	Breast_SE_103_4
1	31951891	31971891	Breast_SE_103_5
1	31971891	31991891	Breast_SE_103_6
1	32008440	32028440	Breast_SE_104_1
1	32166027	32186027	Breast_SE_105_1
1	32186027	32206027	Breast_SE_105_2
1	32206027	32226027	Breast_SE_105_3
1	32226027	32246027	Breast_SE_105_4
1	32246027	32266027	Breast_SE_105_5
1	32266027	32286027	Breast_SE_105_6
1	32302234	32322234	Breast_SE_106_1
1	32322234	32342234	Breast_SE_106_2
1	32342234	32362234	Breast_SE_106_3
1	32362234	32382234	Breast_SE_106_4
1	32382234	32402234	Breast_SE_106_5
1	32671008	32691008	Breast_SE_107_1
1	32691008	32711008	Breast_SE_107_2
1	32711008	32731008	Breast_SE_107_3
1	32731008	32751008	Breast_SE_107_4
1	32751008	32771008	Breast_SE_107_5
1	32771008	32791008	Breast_SE_107_6
1	32791008	32811008	Breast_SE_107_7
1	32811008	32831008	Breast_SE_107_8
1	32912245	32932245	Breast_SE_108_1
1	32932245	32952245	Breast_SE_108_2
1	32952245	32972245	Breast_SE_108_3
1	32972245	32992245	Breast_SE_108_4
1	32992245	33012245	Breast_SE_108_5
1	33012245	33032245	Breast_SE_108_6
1	33032245	33052245	Breast_SE_108_7
1	33052245	33072245	Breast_SE_108_8
1	33072245	33092245	Breast_SE_108_9
1	33092245	33112245	Breast_SE_108_10
1	33125042	33145042	Breast_SE_109_1
1	33145042	33165042	Breast_SE_109_2
1	33165042	33185042	Breast_SE_109_3
1	33214303	33234303	Breast_SE_110_1
1	33234303	33254303	Breast_SE_110_2
1	33254303	33274303	Breast_SE_110_3
1	33274303	33294303	Breast_SE_110_4
1	33294303	33314303	Breast_SE_110_5
1	33314303	33334303	Breast_SE_110_6
1	33334303	33354303	Breast_SE_110_7
1	33354303	33374303	Breast_SE_110_8
1	33374303	33394303	Breast_SE_110_9
1	34732915	34752915	Breast_SE_111_1
1	34752915	34772915	Breast_SE_111_2
1	34772915	34792915	Breast_SE_111_3
1	34792915	34812915	Breast_SE_111_4
1	34812915	34832915	Breast_SE_111_5
1	34832915	34852915	Breast_SE_111_6
1	34852915	34872915	Breast_SE_111_7
1	35501279	35521279	Breast_SE_112_1
1	35521279	35541279	Breast_SE_112_2
1	35541279	35561279	Breast_SE_112_3
1	36080028	36100028	Breast_SE_113_1
1	36100028	36120028	Breast_SE_113_2
1	36120028	36140028	Breast_SE_113_3
1	36140028	36160028	Breast_SE_113_4
1	36160028	36180028	Breast_SE_113_5
1	36180028	36200028	Breast_SE_113_6
1	36200028	36220028	Breast_SE_113_7
1	36220028	36240028	Breast_SE_113_8
1	36240028	36260028	Breast_SE_113_9
1	36260028	36280028	Breast_SE_113_10
1	36280028	36300028	Breast_SE_113_11
1	36300028	36320028	Breast_SE_113_12
1	36320028	36340028	Breast_SE_113_13
1	36340028	36360028	Breast_SE_113_14
1	36360028	36380028	Breast_SE_113_15
1	36380028	36400028	Breast_SE_113_16
1	36400028	36420028	Breast_SE_113_17
1	36420028	36440028	Breast_SE_113_18
1	36474152	36494152	Breast_SE_114_1
1	37443305	37463305	Breast_SE_115_1
1	37463305	37483305	Breast_SE_115_2
1	37483305	37503305	Breast_SE_115_3
1	37503305	37523305	Breast_SE_115_4
1	37523305	37543305	Breast_SE_115_5
1	37960278	37980278	Breast_SE_116_1
1	37980278	38000278	Breast_SE_116_2
1	38000278	38020278	Breast_SE_116_3
1	38020278	38040278	Breast_SE_116_4
1	39061175	39081175	Breast_SE_117_1
1	39081175	39101175	Breast_SE_117_2
1	39101175	39121175	Breast_SE_117_3
1	39121175	39141175	Breast_SE_117_4
1	39141175	39161175	Breast_SE_117_5
1	39161175	39181175	Breast_SE_117_6
1	39181175	39201175	Breast_SE_117_7
1	39201175	39221175	Breast_SE_117_8
1	39221175	39241175	Breast_SE_117_9
1	39373001	39393001	Breast_SE_118_1
1	39393001	39413001	Breast_SE_118_2
1	39413001	39433001	Breast_SE_118_3
1	39872643	39892643	Breast_SE_119_1
1	39892643	39912643	Breast_SE_119_2
1	39895213	39915213	Breast_SE_120_1
1	39915213	39935213	Breast_SE_120_2
1	39935213	39955213	Breast_SE_120_3
1	39955213	39975213	Breast_SE_120_4
1	39975213	39995213	Breast_SE_120_5
1	39995213	40015213	Breast_SE_120_6
1	40015213	40035213	Breast_SE_120_7
1	40035213	40055213	Breast_SE_120_8
1	40055213	40075213	Breast_SE_120_9
1	40075213	40095213	Breast_SE_120_10
1	40095213	40115213	Breast_SE_120_11
1	40300809	40320809	Breast_SE_121_1
1	40369331	40389331	Breast_SE_122_1
1	40389331	40409331	Breast_SE_122_2
1	40689935	40709935	Breast_SE_123_1
1	40709935	40729935	Breast_SE_123_2
1	40769592	40789592	Breast_SE_124_1
1	40789592	40809592	Breast_SE_124_2
1	40809592	40829592	Breast_SE_124_3
1	40829592	40849592	Breast_SE_124_4
1	40849592	40869592	Breast_SE_124_5
1	40869592	40889592	Breast_SE_124_6
1	40889592	40909592	Breast_SE_124_7
1	40909592	40929592	Breast_SE_124_8
1	40929592	40949592	Breast_SE_124_9
1	40949592	40969592	Breast_SE_124_10
1	40969592	40989592	Breast_SE_124_11
1	40989592	41009592	Breast_SE_124_12
1	41009592	41029592	Breast_SE_124_13
1	41311840	41331840	Breast_SE_125_1
1	41331840	41351840	Breast_SE_125_2
1	41351840	41371840	Breast_SE_125_3
1	41371840	41391840	Breast_SE_125_4
1	41391840	41411840	Breast_SE_125_5
1	41411840	41431840	Breast_SE_125_6
1	41431840	41451840	Breast_SE_125_7
1	41451840	41471840	Breast_SE_125_8
1	41471840	41491840	Breast_SE_125_9
1	41491840	41511840	Breast_SE_125_10
1	41511840	41531840	Breast_SE_125_11
1	41531840	41551840	Breast_SE_125_12
1	41605383	41625383	Breast_SE_126_1
1	41625383	41645383	Breast_SE_126_2
1	41645383	41665383	Breast_SE_126_3
1	41665383	41685383	Breast_SE_126_4
1	41685383	41705383	Breast_SE_126_5
1	41794884	41814884	Breast_SE_127_1
1	41814884	41834884	Breast_SE_127_2
1	41834884	41854884	Breast_SE_127_3
1	41854884	41874884	Breast_SE_127_4
1	41874884	41894884	Breast_SE_127_5
1	41894884	41914884	Breast_SE_127_6
1	41914884	41934884	Breast_SE_127_7
1	42731676	42751676	Breast_SE_128_1
1	42751676	42771676	Breast_SE_128_2
1	42911993	42931993	Breast_SE_129_1
1	42931993	42951993	Breast_SE_129_2
1	42951993	42971993	Breast_SE_129_3
1	42971993	42991993	Breast_SE_129_4
1	42991993	43011993	Breast_SE_129_5
1	42999309	43019309	Breast_SE_130_1
1	43019309	43039309	Breast_SE_130_2
1	43039309	43059309	Breast_SE_130_3
1	43059309	43079309	Breast_SE_130_4
1	43256479	43276479	Breast_SE_131_1
1	43276479	43296479	Breast_SE_131_2
1	43296479	43316479	Breast_SE_131_3
1	43326697	43346697	Breast_SE_132_1
1	43346697	43366697	Breast_SE_132_2
1	43366697	43386697	Breast_SE_132_3
1	43386697	43406697	Breast_SE_132_4
1	43408450	43428450	Breast_SE_133_1
1	43428450	43448450	Breast_SE_133_2
1	43448450	43468450	Breast_SE_133_3
1	43468450	43488450	Breast_SE_133_4
1	43488450	43508450	Breast_SE_133_5
1	43508450	43528450	Breast_SE_133_6
1	43528450	43548450	Breast_SE_133_7
1	43548450	43568450	Breast_SE_133_8
1	43568450	43588450	Breast_SE_133_9
1	43588450	43608450	Breast_SE_133_10
1	43608450	43628450	Breast_SE_133_11
1	43810593	43830593	Breast_SE_134_1
1	43830593	43850593	Breast_SE_134_2
1	43850593	43870593	Breast_SE_134_3
1	43870593	43890593	Breast_SE_134_4
1	43890593	43910593	Breast_SE_134_5
1	43910593	43930593	Breast_SE_134_6
1	43930593	43950593	Breast_SE_134_7
1	43950593	43970593	Breast_SE_134_8
1	43970593	43990593	Breast_SE_134_9
1	43990593	44010593	Breast_SE_134_10
1	44010593	44030593	Breast_SE_134_11
1	44030593	44050593	Breast_SE_134_12
1	44050593	44070593	Breast_SE_134_13
1	44070593	44090593	Breast_SE_134_14
1	44546529	44566529	Breast_SE_135_1
1	44711726	44731726	Breast_SE_136_1
1	44731726	44751726	Breast_SE_136_2
1	44751726	44771726	Breast_SE_136_3
1	44771726	44791726	Breast_SE_136_4
1	44791726	44811726	Breast_SE_136_5
1	44811726	44831726	Breast_SE_136_6
1	44831726	44851726	Breast_SE_136_7
1	44851726	44871726	Breast_SE_136_8
1	45301982	45321982	Breast_SE_137_1
1	45321982	45341982	Breast_SE_137_2
1	45341982	45361982	Breast_SE_137_3
1	45477489	45497489	Breast_SE_138_1
1	45497489	45517489	Breast_SE_138_2
1	45517489	45537489	Breast_SE_138_3
1	45537489	45557489	Breast_SE_138_4
1	45557489	45577489	Breast_SE_138_5
1	45577489	45597489	Breast_SE_138_6
1	45676852	45696852	Breast_SE_139_1
1	45677781	45697781	Breast_SE_140_1
1	46123185	46143185	Breast_SE_141_1
1	46151839	46171839	Breast_SE_142_1
1	46171839	46191839	Breast_SE_142_2
1	46191839	46211839	Breast_SE_142_3
1	46211839	46231839	Breast_SE_142_4
1	46231839	46251839	Breast_SE_142_5
1	46265148	46285148	Breast_SE_143_1
1	46285148	46305148	Breast_SE_143_2
1	46305148	46325148	Breast_SE_143_3
1	46325148	46345148	Breast_SE_143_4
1	46345148	46365148	Breast_SE_143_5
1	46738584	46758584	Breast_SE_144_1
1	46758584	46778584	Breast_SE_144_2
1	46779284	46799284	Breast_SE_145_1
1	46799284	46819284	Breast_SE_145_2
1	47176472	47196472	Breast_SE_146_1
1	47208355	47228355	Breast_SE_147_1
1	47228355	47248355	Breast_SE_147_2
1	47248355	47268355	Breast_SE_147_3
1	47312073	47332073	Breast_SE_148_1
1	47332073	47352073	Breast_SE_148_2
1	47352073	47372073	Breast_SE_148_3
1	47372073	47392073	Breast_SE_148_4
1	47540593	47560593	Breast_SE_149_1
1	47560593	47580593	Breast_SE_149_2
1	47580593	47600593	Breast_SE_149_3
1	47670767	47690767	Breast_SE_150_1
1	47690767	47710767	Breast_SE_150_2
1	47710767	47730767	Breast_SE_150_3
1	47981889	48001889	Breast_SE_151_1
1	48001889	48021889	Breast_SE_151_2
1	48021889	48041889	Breast_SE_151_3
1	48041889	48061889	Breast_SE_151_4
1	50950671	50970671	Breast_SE_152_1
1	50970671	50990671	Breast_SE_152_2
1	51250716	51270716	Breast_SE_153_1
1	51270716	51290716	Breast_SE_153_2
1	51290716	51310716	Breast_SE_153_3
1	51310716	51330716	Breast_SE_153_4
1	51330716	51350716	Breast_SE_153_5
1	51531749	51551749	Breast_SE_154_1
1	51551749	51571749	Breast_SE_154_2
1	51571749	51591749	Breast_SE_154_3
1	51591749	51611749	Breast_SE_154_4
1	51611749	51631749	Breast_SE_154_5
1	51631749	51651749	Breast_SE_154_6
1	51651749	51671749	Breast_SE_154_7
1	51886929	51906929	Breast_SE_155_1
1	51906929	51926929	Breast_SE_155_2
1	51926929	51946929	Breast_SE_155_3
1	52125298	52145298	Breast_SE_156_1
1	52653010	52673010	Breast_SE_157_1
1	52673010	52693010	Breast_SE_157_2
1	52693010	52713010	Breast_SE_157_3
1	52897479	52917479	Breast_SE_158_1
1	52917479	52937479	Breast_SE_158_2
1	52937479	52957479	Breast_SE_158_3
1	52957479	52977479	Breast_SE_158_4
1	53036391	53056391	Breast_SE_159_1
1	53056391	53076391	Breast_SE_159_2
1	53076391	53096391	Breast_SE_159_3
1	53096391	53116391	Breast_SE_159_4
1	53116391	53136391	Breast_SE_159_5
1	53136391	53156391	Breast_SE_159_6
1	53261821	53281821	Breast_SE_160_1
1	53281821	53301821	Breast_SE_160_2
1	53301821	53321821	Breast_SE_160_3
1	53321821	53341821	Breast_SE_160_4
1	53588432	53608432	Breast_SE_161_1
1	53608432	53628432	Breast_SE_161_2
1	53628432	53648432	Breast_SE_161_3
1	53648432	53668432	Breast_SE_161_4
1	53668432	53688432	Breast_SE_161_5
1	53688432	53708432	Breast_SE_161_6
1	53723802	53743802	Breast_SE_162_1
1	54210399	54230399	Breast_SE_163_1
1	54230399	54250399	Breast_SE_163_2
1	54250399	54270399	Breast_SE_163_3
1	54270399	54290399	Breast_SE_163_4
1	54290399	54310399	Breast_SE_163_5
1	54310399	54330399	Breast_SE_163_6
1	54330399	54350399	Breast_SE_163_7
1	54350399	54370399	Breast_SE_163_8
1	54370399	54390399	Breast_SE_163_9
1	54390399	54410399	Breast_SE_163_10
1	54410399	54430399	Breast_SE_163_11
1	54448575	54468575	Breast_SE_164_1
1	54468575	54488575	Breast_SE_164_2
1	54488575	54508575	Breast_SE_164_3
1	54839484	54859484	Breast_SE_165_1
1	54859484	54879484	Breast_SE_165_2
1	54879484	54899484	Breast_SE_165_3
1	55183757	55203757	Breast_SE_166_1
1	55203757	55223757	Breast_SE_166_2
1	55223757	55243757	Breast_SE_166_3
1	55243757	55263757	Breast_SE_166_4
1	55263757	55283757	Breast_SE_166_5
1	55413211	55433211	Breast_SE_167_1
1	55433211	55453211	Breast_SE_167_2
1	55681486	55701486	Breast_SE_168_1
1	55701486	55721486	Breast_SE_168_2
1	55721486	55741486	Breast_SE_168_3
1	56187095	56207095	Breast_SE_169_1
1	56357110	56377110	Breast_SE_170_1
1	56377110	56397110	Breast_SE_170_2
1	56481190	56501190	Breast_SE_171_1
1	56501190	56521190	Breast_SE_171_2
1	56521190	56541190	Breast_SE_171_3
1	56541190	56561190	Breast_SE_171_4
1	56561190	56581190	Breast_SE_171_5
1	56581190	56601190	Breast_SE_171_6
1	57822526	57842526	Breast_SE_172_1
1	57842526	57862526	Breast_SE_172_2
1	58565473	58585473	Breast_SE_173_1
1	58585473	58605473	Breast_SE_173_2
1	58670485	58690485	Breast_SE_174_1
1	58690485	58710485	Breast_SE_174_2
1	58710485	58730485	Breast_SE_174_3
1	58730485	58750485	Breast_SE_174_4
1	58750485	58770485	Breast_SE_174_5
1	58770485	58790485	Breast_SE_174_6
1	58790485	58810485	Breast_SE_174_7
1	58810485	58830485	Breast_SE_174_8
1	58830485	58850485	Breast_SE_174_9
1	58850485	58870485	Breast_SE_174_10
1	58870485	58890485	Breast_SE_174_11
1	58890485	58910485	Breast_SE_174_12
1	58910485	58930485	Breast_SE_174_13
1	58930485	58950485	Breast_SE_174_14
1	58990005	59010005	Breast_SE_175_1
1	59010005	59030005	Breast_SE_175_2
1	59030005	59050005	Breast_SE_175_3
1	59050005	59070005	Breast_SE_175_4
1	59070005	59090005	Breast_SE_175_5
1	59096718	59116718	Breast_SE_176_1
1	59116718	59136718	Breast_SE_176_2
1	59136718	59156718	Breast_SE_176_3
1	59156718	59176718	Breast_SE_176_4
1	59664054	59684054	Breast_SE_177_1
1	59684054	59704054	Breast_SE_177_2
1	59704054	59724054	Breast_SE_177_3
1	59724054	59744054	Breast_SE_177_4
1	59744054	59764054	Breast_SE_177_5
1	61035589	61055589	Breast_SE_178_1
1	61055589	61075589	Breast_SE_178_2
1	61075589	61095589	Breast_SE_178_3
1	61095589	61115589	Breast_SE_178_4
1	61115589	61135589	Breast_SE_178_5
1	61135589	61155589	Breast_SE_178_6
1	61155589	61175589	Breast_SE_178_7
1	61175589	61195589	Breast_SE_178_8
1	61195589	61215589	Breast_SE_178_9
1	61215589	61235589	Breast_SE_178_10
1	61416853	61436853	Breast_SE_179_1
1	61436853	61456853	Breast_SE_179_2
1	61456853	61476853	Breast_SE_179_3
1	61722745	61742745	Breast_SE_180_1
1	61742745	61762745	Breast_SE_180_2
1	62266869	62286869	Breast_SE_181_1
1	62286869	62306869	Breast_SE_181_2
1	62306869	62326869	Breast_SE_181_3
1	62326869	62346869	Breast_SE_181_4
1	62418257	62438257	Breast_SE_182_1
1	62438257	62458257	Breast_SE_182_2
1	63640104	63660104	Breast_SE_183_1
1	63660104	63680104	Breast_SE_183_2
1	64031221	64051221	Breast_SE_184_1
1	64467382	64487382	Breast_SE_185_1
1	64487382	64507382	Breast_SE_185_2
1	64507382	64527382	Breast_SE_185_3
1	64527382	64547382	Breast_SE_185_4
1	64547382	64567382	Breast_SE_185_5
1	64818870	64838870	Breast_SE_186_1
1	64838870	64858870	Breast_SE_186_2
1	64858870	64878870	Breast_SE_186_3
1	64878870	64898870	Breast_SE_186_4
1	64898870	64918870	Breast_SE_186_5
1	64918870	64938870	Breast_SE_186_6
1	64938870	64958870	Breast_SE_186_7
1	64958870	64978870	Breast_SE_186_8
1	64978870	64998870	Breast_SE_186_9
1	64998870	65018870	Breast_SE_186_10
1	65018870	65038870	Breast_SE_186_11
1	65038870	65058870	Breast_SE_186_12
1	65058870	65078870	Breast_SE_186_13
1	65404170	65424170	Breast_SE_187_1
1	65424170	65444170	Breast_SE_187_2
1	66226373	66246373	Breast_SE_188_1
1	66246373	66266373	Breast_SE_188_2
1	66266373	66286373	Breast_SE_188_3
1	66286373	66306373	Breast_SE_188_4
1	66306373	66326373	Breast_SE_188_5
1	66326373	66346373	Breast_SE_188_6
1	66346373	66366373	Breast_SE_188_7
1	66366373	66386373	Breast_SE_188_8
1	66386373	66406373	Breast_SE_188_9
1	66529011	66549011	Breast_SE_189_1
1	66549011	66569011	Breast_SE_189_2
1	66569011	66589011	Breast_SE_189_3
1	66908330	66928330	Breast_SE_190_1
1	66928330	66948330	Breast_SE_190_2
1	66948330	66968330	Breast_SE_190_3
1	66968330	66988330	Breast_SE_190_4
1	67602473	67622473	Breast_SE_191_1
1	67622473	67642473	Breast_SE_191_2
1	67642473	67662473	Breast_SE_191_3
1	67662473	67682473	Breast_SE_191_4
1	67682473	67702473	Breast_SE_191_5
1	67702473	67722473	Breast_SE_191_6
1	67722473	67742473	Breast_SE_191_7
1	67742473	67762473	Breast_SE_191_8
1	67762473	67782473	Breast_SE_191_9
1	67782473	67802473	Breast_SE_191_10
1	67802473	67822473	Breast_SE_191_11
1	67822473	67842473	Breast_SE_191_12
1	67842473	67862473	Breast_SE_191_13
1	68173081	68193081	Breast_SE_192_1
1	68193081	68213081	Breast_SE_192_2
1	68213081	68233081	Breast_SE_192_3
1	68365622	68385622	Breast_SE_193_1
1	68385622	68405622	Breast_SE_193_2
1	72271654	72291654	Breast_SE_194_1
1	75127680	75147680	Breast_SE_195_1
1	76855634	76875634	Breast_SE_196_1
1	76875634	76895634	Breast_SE_196_2
1	76895634	76915634	Breast_SE_196_3
1	76985142	77005142	Breast_SE_197_1
1	77005142	77025142	Breast_SE_197_2
1	77025142	77045142	Breast_SE_197_3
1	77488019	77508019	Breast_SE_198_1
1	77508019	77528019	Breast_SE_198_2
1	77528019	77548019	Breast_SE_198_3
1	77672942	77692942	Breast_SE_199_1
1	77854766	77874766	Breast_SE_200_1
1	77874766	77894766	Breast_SE_200_2
1	77966173	77986173	Breast_SE_201_1
1	80361497	80381497	Breast_SE_202_1
1	80381497	80401497	Breast_SE_202_2
1	80401497	80421497	Breast_SE_202_3
1	80433508	80453508	Breast_SE_203_1
1	80453508	80473508	Breast_SE_203_2
1	80473508	80493508	Breast_SE_203_3
1	80493508	80513508	Breast_SE_203_4
1	80513508	80533508	Breast_SE_203_5
1	80533508	80553508	Breast_SE_203_6
1	80553508	80573508	Breast_SE_203_7
1	80573508	80593508	Breast_SE_203_8
1	80593508	80613508	Breast_SE_203_9
1	80613508	80633508	Breast_SE_203_10
1	80633508	80653508	Breast_SE_203_11
1	80653508	80673508	Breast_SE_203_12
1	80673508	80693508	Breast_SE_203_13
1	81783444	81803444	Breast_SE_204_1
1	81803444	81823444	Breast_SE_204_2
1	81823444	81843444	Breast_SE_204_3
1	85184903	85204903	Breast_SE_205_1
1	85204903	85224903	Breast_SE_205_2
1	85224903	85244903	Breast_SE_205_3
1	85244903	85264903	Breast_SE_205_4
1	85256782	85276782	Breast_SE_206_1
1	85276782	85296782	Breast_SE_206_2
1	85296782	85316782	Breast_SE_206_3
1	85316782	85336782	Breast_SE_206_4
1	85336782	85356782	Breast_SE_206_5
1	85356782	85376782	Breast_SE_206_6
1	85416647	85436647	Breast_SE_207_1
1	85436647	85456647	Breast_SE_207_2
1	85456647	85476647	Breast_SE_207_3
1	85513890	85533890	Breast_SE_208_1
1	85533890	85553890	Breast_SE_208_2
1	85553890	85573890	Breast_SE_208_3
1	85573890	85593890	Breast_SE_208_4
1	85593890	85613890	Breast_SE_208_5
1	85613890	85633890	Breast_SE_208_6
1	85633890	85653890	Breast_SE_208_7
1	85653890	85673890	Breast_SE_208_8
1	85673890	85693890	Breast_SE_208_9
1	85693890	85713890	Breast_SE_208_10
1	86698848	86718848	Breast_SE_209_1
1	87317491	87337491	Breast_SE_210_1
1	87337491	87357491	Breast_SE_210_2
1	87773116	87793116	Breast_SE_211_1
1	87793116	87813116	Breast_SE_211_2
1	87813116	87833116	Breast_SE_211_3
1	87833116	87853116	Breast_SE_211_4
1	87853116	87873116	Breast_SE_211_5
1	89013380	89033380	Breast_SE_212_1
1	89033380	89053380	Breast_SE_212_2
1	89053380	89073380	Breast_SE_212_3
1	89620665	89640665	Breast_SE_213_1
1	89640665	89660665	Breast_SE_213_2
1	89660665	89680665	Breast_SE_213_3
1	89686455	89706455	Breast_SE_214_1
1	89706455	89726455	Breast_SE_214_2
1	89726455	89746455	Breast_SE_214_3
1	89746455	89766455	Breast_SE_214_4
1	89806595	89826595	Breast_SE_215_1
1	89826595	89846595	Breast_SE_215_2
1	89879583	89899583	Breast_SE_216_1
1	89899583	89919583	Breast_SE_216_2
1	89919583	89939583	Breast_SE_216_3
1	89939583	89959583	Breast_SE_216_4
1	91009754	91029754	Breast_SE_217_1
1	91520436	91540436	Breast_SE_218_1
1	91540436	91560436	Breast_SE_218_2
1	91560436	91580436	Breast_SE_218_3
1	91575128	91595128	Breast_SE_219_1
1	91595128	91615128	Breast_SE_219_2
1	91615128	91635128	Breast_SE_219_3
1	91635128	91655128	Breast_SE_219_4
1	91666552	91686552	Breast_SE_220_1
1	91686552	91706552	Breast_SE_220_2
1	91706552	91726552	Breast_SE_220_3
1	91726552	91746552	Breast_SE_220_4
1	91746552	91766552	Breast_SE_220_5
1	91766552	91786552	Breast_SE_220_6
1	91786552	91806552	Breast_SE_220_7
1	91806552	91826552	Breast_SE_220_8
1	91826552	91846552	Breast_SE_220_9
1	91846552	91866552	Breast_SE_220_10
1	91866552	91886552	Breast_SE_220_11
1	91886552	91906552	Breast_SE_220_12
1	92767075	92787075	Breast_SE_221_1
1	92787075	92807075	Breast_SE_221_2
1	92807075	92827075	Breast_SE_221_3
1	92827075	92847075	Breast_SE_221_4
1	93550646	93570646	Breast_SE_222_1
1	93570646	93590646	Breast_SE_222_2
1	93590646	93610646	Breast_SE_222_3
1	93610646	93630646	Breast_SE_222_4
1	93630646	93650646	Breast_SE_222_5
1	93650646	93670646	Breast_SE_222_6
1	93670646	93690646	Breast_SE_222_7
1	93690646	93710646	Breast_SE_222_8
1	93710646	93730646	Breast_SE_222_9
1	93730646	93750646	Breast_SE_222_10
1	93750646	93770646	Breast_SE_222_11
1	93770646	93790646	Breast_SE_222_12
1	93790646	93810646	Breast_SE_222_13
1	93810646	93830646	Breast_SE_222_14
1	93830646	93850646	Breast_SE_222_15
1	93956331	93976331	Breast_SE_223_1
1	93976331	93996331	Breast_SE_223_2
1	93996331	94016331	Breast_SE_223_3
1	94016331	94036331	Breast_SE_223_4
1	94036331	94056331	Breast_SE_223_5
1	94056331	94076331	Breast_SE_223_6
1	94076331	94096331	Breast_SE_223_7
1	94096331	94116331	Breast_SE_223_8
1	94116331	94136331	Breast_SE_223_9
1	94136331	94156331	Breast_SE_223_10
1	94162758	94182758	Breast_SE_224_1
1	94182758	94202758	Breast_SE_224_2
1	94202758	94222758	Breast_SE_224_3
1	94222758	94242758	Breast_SE_224_4
1	94242758	94262758	Breast_SE_224_5
1	94262758	94282758	Breast_SE_224_6
1	94282758	94302758	Breast_SE_224_7
1	94302758	94322758	Breast_SE_224_8
1	94322758	94342758	Breast_SE_224_9
1	94504704	94524704	Breast_SE_225_1
1	94524704	94544704	Breast_SE_225_2
1	94544704	94564704	Breast_SE_225_3
1	94564704	94584704	Breast_SE_225_4
1	94584704	94604704	Breast_SE_225_5
1	94604704	94624704	Breast_SE_225_6
1	94624704	94644704	Breast_SE_225_7
1	94644704	94664704	Breast_SE_225_8
1	94664704	94684704	Breast_SE_225_9
1	94684704	94704704	Breast_SE_225_10
1	94704704	94724704	Breast_SE_225_11
1	94724704	94744704	Breast_SE_225_12
1	94744704	94764704	Breast_SE_225_13
1	94811697	94831697	Breast_SE_226_1
1	94831697	94851697	Breast_SE_226_2
1	94851697	94871697	Breast_SE_226_3
1	94871697	94891697	Breast_SE_226_4
1	94891697	94911697	Breast_SE_226_5
1	94911697	94931697	Breast_SE_226_6
1	94931697	94951697	Breast_SE_226_7
1	94951697	94971697	Breast_SE_226_8
1	94971697	94991697	Breast_SE_226_9
1	94991697	95011697	Breast_SE_226_10
1	95011697	95031697	Breast_SE_226_11
1	95031697	95051697	Breast_SE_226_12
1	96353365	96373365	Breast_SE_227_1
1	96373365	96393365	Breast_SE_227_2
1	97883130	97903130	Breast_SE_228_1
1	97903130	97923130	Breast_SE_228_2
1	97994595	98014595	Breast_SE_229_1
1	98014595	98034595	Breast_SE_229_2
1	98034595	98054595	Breast_SE_229_3
1	98054595	98074595	Breast_SE_229_4
1	98074595	98094595	Breast_SE_229_5
1	98094595	98114595	Breast_SE_229_6
1	98154081	98174081	Breast_SE_230_1
1	98174081	98194081	Breast_SE_230_2
1	98194081	98214081	Breast_SE_230_3
1	98214081	98234081	Breast_SE_230_4
1	98230859	98250859	Breast_SE_231_1
1	98250859	98270859	Breast_SE_231_2
1	98270859	98290859	Breast_SE_231_3
1	98290859	98310859	Breast_SE_231_4
1	98310859	98330859	Breast_SE_231_5
1	98330859	98350859	Breast_SE_231_6
1	98350859	98370859	Breast_SE_231_7
1	98370859	98390859	Breast_SE_231_8
1	98390859	98410859	Breast_SE_231_9
1	98410859	98430859	Breast_SE_231_10
1	98430859	98450859	Breast_SE_231_11
1	98450859	98470859	Breast_SE_231_12
1	98470859	98490859	Breast_SE_231_13
1	99630532	99650532	Breast_SE_232_1
1	99650532	99670532	Breast_SE_232_2
1	99670532	99690532	Breast_SE_232_3
1	99690532	99710532	Breast_SE_232_4
1	100034027	100054027	Breast_SE_233_1
1	100589401	100609401	Breast_SE_234_1
1	100609401	100629401	Breast_SE_234_2
1	100629401	100649401	Breast_SE_234_3
1	107047114	107067114	Breast_SE_235_1
1	107047128	107067128	Breast_SE_236_1
1	107520476	107540476	Breast_SE_237_1
1	107540476	107560476	Breast_SE_237_2
1	107560476	107580476	Breast_SE_237_3
1	107588222	107608222	Breast_SE_238_1
1	107608222	107628222	Breast_SE_238_2
1	107628222	107648222	Breast_SE_238_3
1	107648222	107668222	Breast_SE_238_4
1	107668222	107688222	Breast_SE_238_5
1	107688222	107708222	Breast_SE_238_6
1	108185926	108205926	Breast_SE_239_1
1	108510874	108530874	Breast_SE_240_1
1	108530874	108550874	Breast_SE_240_2
1	108550874	108570874	Breast_SE_240_3
1	108658006	108678006	Breast_SE_241_1
1	108678006	108698006	Breast_SE_241_2
1	108810872	108830872	Breast_SE_242_1
1	108830872	108850872	Breast_SE_242_2
1	108952849	108972849	Breast_SE_243_1
1	109034494	109054494	Breast_SE_244_1
1	109054494	109074494	Breast_SE_244_2
1	109074494	109094494	Breast_SE_244_3
1	109094494	109114494	Breast_SE_244_4
1	109114494	109134494	Breast_SE_244_5
1	109134494	109154494	Breast_SE_244_6
1	109154494	109174494	Breast_SE_244_7
1	109174494	109194494	Breast_SE_244_8
1	109194494	109214494	Breast_SE_244_9
1	109214494	109234494	Breast_SE_244_10
1	109234494	109254494	Breast_SE_244_11
1	109254494	109274494	Breast_SE_244_12
1	109274494	109294494	Breast_SE_244_13
1	109294494	109314494	Breast_SE_244_14
1	109611252	109631252	Breast_SE_245_1
1	109631252	109651252	Breast_SE_245_2
1	109651252	109671252	Breast_SE_245_3
1	109675526	109695526	Breast_SE_246_1
1	109695526	109715526	Breast_SE_246_2
1	109715526	109735526	Breast_SE_246_3
1	109735526	109755526	Breast_SE_246_4
1	109755526	109775526	Breast_SE_246_5
1	109775526	109795526	Breast_SE_246_6
1	109795526	109815526	Breast_SE_246_7
1	109815526	109835526	Breast_SE_246_8
1	109835526	109855526	Breast_SE_246_9
1	109855526	109875526	Breast_SE_246_10
1	109875526	109895526	Breast_SE_246_11
1	109895526	109915526	Breast_SE_246_12
1	109915526	109935526	Breast_SE_246_13
1	109935526	109955526	Breast_SE_246_14
1	109955526	109975526	Breast_SE_246_15
1	109975526	109995526	Breast_SE_246_16
1	109995526	110015526	Breast_SE_246_17
1	110015526	110035526	Breast_SE_246_18
1	110035526	110055526	Breast_SE_246_19
1	110055526	110075526	Breast_SE_246_20
1	110075526	110095526	Breast_SE_246_21
1	110095526	110115526	Breast_SE_246_22
1	110115526	110135526	Breast_SE_246_23
1	110145481	110165481	Breast_SE_247_1
1	110165481	110185481	Breast_SE_247_2
1	110185481	110205481	Breast_SE_247_3
1	110205481	110225481	Breast_SE_247_4
1	110225481	110245481	Breast_SE_247_5
1	110245481	110265481	Breast_SE_247_6
1	110318441	110338441	Breast_SE_248_1
1	110338441	110358441	Breast_SE_248_2
1	110358441	110378441	Breast_SE_248_3
1	110378441	110398441	Breast_SE_248_4
1	110398441	110418441	Breast_SE_248_5
1	111175849	111195849	Breast_SE_249_1
1	111195849	111215849	Breast_SE_249_2
1	111215849	111235849	Breast_SE_249_3
1	111235849	111255849	Breast_SE_249_4
1	111255849	111275849	Breast_SE_249_5
1	111701149	111721149	Breast_SE_250_1
1	111721149	111741149	Breast_SE_250_2
1	111741149	111761149	Breast_SE_250_3
1	112386432	112406432	Breast_SE_251_1
1	112593220	112613220	Breast_SE_252_1
1	112613220	112633220	Breast_SE_252_2
1	112633220	112653220	Breast_SE_252_3
1	112653788	112673788	Breast_SE_253_1
1	112673788	112693788	Breast_SE_253_2
1	112693788	112713788	Breast_SE_253_3
1	112713788	112733788	Breast_SE_253_4
1	112733788	112753788	Breast_SE_253_5
1	112831720	112851720	Breast_SE_254_1
1	112851720	112871720	Breast_SE_254_2
1	112871720	112891720	Breast_SE_254_3
1	113185483	113205483	Breast_SE_255_1
1	113205483	113225483	Breast_SE_255_2
1	113379789	113399789	Breast_SE_256_1
1	113802126	113822126	Breast_SE_257_1
1	113919610	113939610	Breast_SE_258_1
1	113923828	113943828	Breast_SE_259_1
1	114106787	114126787	Breast_SE_260_1
1	114466881	114486881	Breast_SE_261_1
1	114486881	114506881	Breast_SE_261_2
1	114506881	114526881	Breast_SE_261_3
1	114745381	114765381	Breast_SE_262_1
1	114747183	114767183	Breast_SE_263_1
1	114747222	114767222	Breast_SE_264_1
1	114747349	114767349	Breast_SE_265_1
1	115060257	115080257	Breast_SE_266_1
1	115080257	115100257	Breast_SE_266_2
1	115100257	115120257	Breast_SE_266_3
1	115120257	115140257	Breast_SE_266_4
1	115265875	115285875	Breast_SE_267_1
1	115285875	115305875	Breast_SE_267_2
1	115305875	115325875	Breast_SE_267_3
1	115325875	115345875	Breast_SE_267_4
1	115345875	115365875	Breast_SE_267_5
1	115418232	115438232	Breast_SE_268_1
1	115654842	115674842	Breast_SE_269_1
1	115674842	115694842	Breast_SE_269_2
1	115766017	115786017	Breast_SE_270_1
1	115786017	115806017	Breast_SE_270_2
1	115806017	115826017	Breast_SE_270_3
1	115826017	115846017	Breast_SE_270_4
1	116089987	116109987	Breast_SE_271_1
1	116109987	116129987	Breast_SE_271_2
1	116129987	116149987	Breast_SE_271_3
1	116149987	116169987	Breast_SE_271_4
1	116169987	116189987	Breast_SE_271_5
1	116189987	116209987	Breast_SE_271_6
1	116301213	116321213	Breast_SE_272_1
1	116304484	116324484	Breast_SE_273_1
1	116324484	116344484	Breast_SE_273_2
1	116344484	116364484	Breast_SE_273_3
1	116364484	116384484	Breast_SE_273_4
1	116384484	116404484	Breast_SE_273_5
1	116404484	116424484	Breast_SE_273_6
1	116441249	116461249	Breast_SE_274_1
1	116461249	116481249	Breast_SE_274_2
1	116481249	116501249	Breast_SE_274_3
1	116501249	116521249	Breast_SE_274_4
1	116521249	116541249	Breast_SE_274_5
1	116541249	116561249	Breast_SE_274_6
1	116561249	116581249	Breast_SE_274_7
1	116581249	116601249	Breast_SE_274_8
1	116601249	116621249	Breast_SE_274_9
1	116621249	116641249	Breast_SE_274_10
1	116655540	116675540	Breast_SE_275_1
1	116675540	116695540	Breast_SE_275_2
1	116863435	116883435	Breast_SE_276_1
1	116883435	116903435	Breast_SE_276_2
1	116903435	116923435	Breast_SE_276_3
1	116923435	116943435	Breast_SE_276_4
1	117145176	117165176	Breast_SE_277_1
1	117165176	117185176	Breast_SE_277_2
1	117185176	117205176	Breast_SE_277_3
1	117205176	117225176	Breast_SE_277_4
1	117225176	117245176	Breast_SE_277_5
1	117245176	117265176	Breast_SE_277_6
1	117265176	117285176	Breast_SE_277_7
1	117335977	117355977	Breast_SE_278_1
1	117355977	117375977	Breast_SE_278_2
1	117527015	117547015	Breast_SE_279_1
1	117547015	117567015	Breast_SE_279_2
1	117567015	117587015	Breast_SE_279_3
1	117587015	117607015	Breast_SE_279_4
1	117607015	117627015	Breast_SE_279_5
1	117627015	117647015	Breast_SE_279_6
1	117647015	117667015	Breast_SE_279_7
1	117667015	117687015	Breast_SE_279_8
1	117687015	117707015	Breast_SE_279_9
1	118918976	118938976	Breast_SE_280_1
1	118938976	118958976	Breast_SE_280_2
1	118958976	118978976	Breast_SE_280_3
1	118978976	118998976	Breast_SE_280_4
1	118998976	119018976	Breast_SE_280_5
1	119628979	119648979	Breast_SE_281_1
1	119648979	119668979	Breast_SE_281_2
1	119668979	119688979	Breast_SE_281_3
1	119709549	119729549	Breast_SE_282_1
1	119729549	119749549	Breast_SE_282_2
1	119758821	119778821	Breast_SE_283_1
1	119778821	119798821	Breast_SE_283_2
1	145682843	145702843	Breast_SE_284_1
1	145702843	145722843	Breast_SE_284_2
1	145806405	145826405	Breast_SE_285_1
1	145826405	145846405	Breast_SE_285_2
1	145846405	145866405	Breast_SE_285_3
1	145866405	145886405	Breast_SE_285_4
1	145886405	145906405	Breast_SE_285_5
1	145906405	145926405	Breast_SE_285_6
1	145926405	145946405	Breast_SE_285_7
1	145946405	145966405	Breast_SE_285_8
1	145966405	145986405	Breast_SE_285_9
1	145986405	146006405	Breast_SE_285_10
1	146006405	146026405	Breast_SE_285_11
1	146022636	146042636	Breast_SE_286_1
1	146042636	146062636	Breast_SE_286_2
1	147157653	147177653	Breast_SE_287_1
1	147493421	147513421	Breast_SE_288_1
1	147513421	147533421	Breast_SE_288_2
1	147533421	147553421	Breast_SE_288_3
1	147623042	147643042	Breast_SE_289_1
1	147643042	147663042	Breast_SE_289_2
1	147663042	147683042	Breast_SE_289_3
1	147741896	147761896	Breast_SE_290_1
1	147761896	147781896	Breast_SE_290_2
1	148365859	148385859	Breast_SE_291_1
1	148385859	148405859	Breast_SE_291_2
1	148405859	148425859	Breast_SE_291_3
1	148425859	148445859	Breast_SE_291_4
1	149871259	149891259	Breast_SE_292_1
1	149891259	149911259	Breast_SE_292_2
1	149911259	149931259	Breast_SE_292_3
1	149931259	149951259	Breast_SE_292_4
1	149975965	149995965	Breast_SE_293_1
1	149995965	150015965	Breast_SE_293_2
1	150133003	150153003	Breast_SE_294_1
1	150153003	150173003	Breast_SE_294_2
1	150173003	150193003	Breast_SE_294_3
1	150207966	150227966	Breast_SE_295_1
1	150227966	150247966	Breast_SE_295_2
1	150247966	150267966	Breast_SE_295_3
1	150267966	150287966	Breast_SE_295_4
1	150287966	150307966	Breast_SE_295_5
1	150346567	150366567	Breast_SE_296_1
1	150366567	150386567	Breast_SE_296_2
1	150386567	150406567	Breast_SE_296_3
1	150406567	150426567	Breast_SE_296_4
1	150500581	150520581	Breast_SE_297_1
1	150520581	150540581	Breast_SE_297_2
1	150540581	150560581	Breast_SE_297_3
1	150560581	150580581	Breast_SE_297_4
1	150580581	150600581	Breast_SE_297_5
1	150600581	150620581	Breast_SE_297_6
1	150620581	150640581	Breast_SE_297_7
1	150640581	150660581	Breast_SE_297_8
1	150937601	150957601	Breast_SE_298_1
1	150957601	150977601	Breast_SE_298_2
1	150977601	150997601	Breast_SE_298_3
1	150997601	151017601	Breast_SE_298_4
1	151015670	151035670	Breast_SE_299_1
1	151035670	151055670	Breast_SE_299_2
1	151055670	151075670	Breast_SE_299_3
1	151075670	151095670	Breast_SE_299_4
1	151178958	151198958	Breast_SE_300_1
1	151198958	151218958	Breast_SE_300_2
1	151218958	151238958	Breast_SE_300_3
1	151241199	151261199	Breast_SE_301_1
1	151261199	151281199	Breast_SE_301_2
1	151281199	151301199	Breast_SE_301_3
1	151301199	151321199	Breast_SE_301_4
1	151321199	151341199	Breast_SE_301_5
1	151341199	151361199	Breast_SE_301_6
1	151361199	151381199	Breast_SE_301_7
1	151391753	151411753	Breast_SE_302_1
1	151488978	151508978	Breast_SE_303_1
1	151508978	151528978	Breast_SE_303_2
1	151528978	151548978	Breast_SE_303_3
1	151548978	151568978	Breast_SE_303_4
1	151568978	151588978	Breast_SE_303_5
1	151588978	151608978	Breast_SE_303_6
1	151608978	151628978	Breast_SE_303_7
1	151702583	151722583	Breast_SE_304_1
1	151722583	151742583	Breast_SE_304_2
1	151751760	151771760	Breast_SE_305_1
1	151771760	151791760	Breast_SE_305_2
1	151791760	151811760	Breast_SE_305_3
1	151811760	151831760	Breast_SE_305_4
1	151831760	151851760	Breast_SE_305_5
1	151851760	151871760	Breast_SE_305_6
1	151871760	151891760	Breast_SE_305_7
1	151891760	151911760	Breast_SE_305_8
1	151911760	151931760	Breast_SE_305_9
1	151935014	151955014	Breast_SE_306_1
1	151955014	151975014	Breast_SE_306_2
1	151975014	151995014	Breast_SE_306_3
1	151995014	152015014	Breast_SE_306_4
1	152015014	152035014	Breast_SE_306_5
1	152035014	152055014	Breast_SE_306_6
1	152139443	152159443	Breast_SE_307_1
1	152159443	152179443	Breast_SE_307_2
1	152179443	152199443	Breast_SE_307_3
1	152859674	152879674	Breast_SE_308_1
1	152879674	152899674	Breast_SE_308_2
1	152899674	152919674	Breast_SE_308_3
1	152919674	152939674	Breast_SE_308_4
1	152939674	152959674	Breast_SE_308_5
1	152959674	152979674	Breast_SE_308_6
1	153342223	153362223	Breast_SE_309_1
1	153362223	153382223	Breast_SE_309_2
1	153382223	153402223	Breast_SE_309_3
1	153402223	153422223	Breast_SE_309_4
1	153422223	153442223	Breast_SE_309_5
1	153454265	153474265	Breast_SE_310_1
1	153474265	153494265	Breast_SE_310_2
1	153494265	153514265	Breast_SE_310_3
1	153514265	153534265	Breast_SE_310_4
1	153534265	153554265	Breast_SE_310_5
1	153554265	153574265	Breast_SE_310_6
1	153574265	153594265	Breast_SE_310_7
1	153594265	153614265	Breast_SE_310_8
1	153614265	153634265	Breast_SE_310_9
1	153634265	153654265	Breast_SE_310_10
1	153654265	153674265	Breast_SE_310_11
1	153674265	153694265	Breast_SE_310_12
1	153694265	153714265	Breast_SE_310_13
1	153723704	153743704	Breast_SE_311_1
1	153743704	153763704	Breast_SE_311_2
1	153763704	153783704	Breast_SE_311_3
1	153783704	153803704	Breast_SE_311_4
1	153803704	153823704	Breast_SE_311_5
1	153897651	153917651	Breast_SE_312_1
1	153917651	153937651	Breast_SE_312_2
1	153937651	153957651	Breast_SE_312_3
1	153957651	153977651	Breast_SE_312_4
1	153977651	153997651	Breast_SE_312_5
1	153997651	154017651	Breast_SE_312_6
1	154156503	154176503	Breast_SE_313_1
1	154176503	154196503	Breast_SE_313_2
1	154196503	154216503	Breast_SE_313_3
1	154216503	154236503	Breast_SE_313_4
1	154236503	154256503	Breast_SE_313_5
1	154256503	154276503	Breast_SE_313_6
1	154383936	154403936	Breast_SE_314_1
1	154403936	154423936	Breast_SE_314_2
1	154423936	154443936	Breast_SE_314_3
1	154443936	154463936	Breast_SE_314_4
1	154463936	154483936	Breast_SE_314_5
1	154483936	154503936	Breast_SE_314_6
1	154594175	154614175	Breast_SE_315_1
1	154614175	154634175	Breast_SE_315_2
1	154896696	154916696	Breast_SE_316_1
1	154916696	154936696	Breast_SE_316_2
1	154936696	154956696	Breast_SE_316_3
1	154956696	154976696	Breast_SE_316_4
1	154976696	154996696	Breast_SE_316_5
1	154996696	155016696	Breast_SE_316_6
1	155016696	155036696	Breast_SE_316_7
1	155036696	155056696	Breast_SE_316_8
1	155056696	155076696	Breast_SE_316_9
1	155076696	155096696	Breast_SE_316_10
1	155096696	155116696	Breast_SE_316_11
1	155116696	155136696	Breast_SE_316_12
1	155136696	155156696	Breast_SE_316_13
1	155151140	155171140	Breast_SE_317_1
1	155171140	155191140	Breast_SE_317_2
1	155191140	155211140	Breast_SE_317_3
1	155211140	155231140	Breast_SE_317_4
1	155231140	155251140	Breast_SE_317_5
1	155251140	155271140	Breast_SE_317_6
1	155271140	155291140	Breast_SE_317_7
1	155291140	155311140	Breast_SE_317_8
1	155311140	155331140	Breast_SE_317_9
1	155331140	155351140	Breast_SE_317_10
1	155552816	155572816	Breast_SE_318_1
1	155555128	155575128	Breast_SE_319_1
1	155634170	155654170	Breast_SE_320_1
1	155654170	155674170	Breast_SE_320_2
1	155674847	155694847	Breast_SE_321_1
1	155694847	155714847	Breast_SE_321_2
1	155881803	155901803	Breast_SE_322_1
1	155901803	155921803	Breast_SE_322_2
1	155921803	155941803	Breast_SE_322_3
1	155941803	155961803	Breast_SE_322_4
1	155961803	155981803	Breast_SE_322_5
1	155981803	156001803	Breast_SE_322_6
1	156001803	156021803	Breast_SE_322_7
1	156021803	156041803	Breast_SE_322_8
1	156041803	156061803	Breast_SE_322_9
1	156061803	156081803	Breast_SE_322_10
1	156081803	156101803	Breast_SE_322_11
1	156101803	156121803	Breast_SE_322_12
1	156121803	156141803	Breast_SE_322_13
1	156141803	156161803	Breast_SE_322_14
1	156161803	156181803	Breast_SE_322_15
1	156181803	156201803	Breast_SE_322_16
1	156201803	156221803	Breast_SE_322_17
1	156221803	156241803	Breast_SE_322_18
1	156241803	156261803	Breast_SE_322_19
1	156261803	156281803	Breast_SE_322_20
1	156281803	156301803	Breast_SE_322_21
1	156301803	156321803	Breast_SE_322_22
1	156321803	156341803	Breast_SE_322_23
1	156440801	156460801	Breast_SE_323_1
1	156460801	156480801	Breast_SE_323_2
1	156480801	156500801	Breast_SE_323_3
1	156500801	156520801	Breast_SE_323_4
1	156520801	156540801	Breast_SE_323_5
1	156637984	156657984	Breast_SE_324_1
1	156657984	156677984	Breast_SE_324_2
1	156677984	156697984	Breast_SE_324_3
1	156697984	156717984	Breast_SE_324_4
1	156717984	156737984	Breast_SE_324_5
1	156737984	156757984	Breast_SE_324_6
1	156757984	156777984	Breast_SE_324_7
1	156777984	156797984	Breast_SE_324_8
1	156797984	156817984	Breast_SE_324_9
1	156849968	156869968	Breast_SE_325_1
1	156869968	156889968	Breast_SE_325_2
1	156889968	156909968	Breast_SE_325_3
1	156909968	156929968	Breast_SE_325_4
1	157069049	157089049	Breast_SE_326_1
1	157089049	157109049	Breast_SE_326_2
1	157109049	157129049	Breast_SE_326_3
1	157129049	157149049	Breast_SE_326_4
1	157149049	157169049	Breast_SE_326_5
1	157169049	157189049	Breast_SE_326_6
1	157985626	158005626	Breast_SE_327_1
1	158005626	158025626	Breast_SE_327_2
1	158025626	158045626	Breast_SE_327_3
1	158045626	158065626	Breast_SE_327_4
1	158065626	158085626	Breast_SE_327_5
1	158085626	158105626	Breast_SE_327_6
1	159589046	159609046	Breast_SE_328_1
1	159793897	159813897	Breast_SE_329_1
1	159813897	159833897	Breast_SE_329_2
1	159833897	159853897	Breast_SE_329_3
1	159853897	159873897	Breast_SE_329_4
1	159873897	159893897	Breast_SE_329_5
1	159893897	159913897	Breast_SE_329_6
1	159913897	159933897	Breast_SE_329_7
1	159933897	159953897	Breast_SE_329_8
1	159953897	159973897	Breast_SE_329_9
1	160043922	160063922	Breast_SE_330_1
1	160063922	160083922	Breast_SE_330_2
1	160083922	160103922	Breast_SE_330_3
1	160103922	160123922	Breast_SE_330_4
1	160123922	160143922	Breast_SE_330_5
1	160143922	160163922	Breast_SE_330_6
1	160163922	160183922	Breast_SE_330_7
1	160183922	160203922	Breast_SE_330_8
1	160203922	160223922	Breast_SE_330_9
1	160252398	160272398	Breast_SE_331_1
1	160339426	160359426	Breast_SE_332_1
1	160359426	160379426	Breast_SE_332_2
1	160397697	160417697	Breast_SE_333_1
1	160978509	160998509	Breast_SE_334_1
1	160998509	161018509	Breast_SE_334_2
1	161018509	161038509	Breast_SE_334_3
1	161038509	161058509	Breast_SE_334_4
1	161058084	161078084	Breast_SE_335_1
1	161078084	161098084	Breast_SE_335_2
1	161098084	161118084	Breast_SE_335_3
1	161118084	161138084	Breast_SE_335_4
1	161138084	161158084	Breast_SE_335_5
1	161158084	161178084	Breast_SE_335_6
1	161178084	161198084	Breast_SE_335_7
1	161198084	161218084	Breast_SE_335_8
1	161218084	161238084	Breast_SE_335_9
1	161350889	161370889	Breast_SE_336_1
1	161370889	161390889	Breast_SE_336_2
1	161390889	161410889	Breast_SE_336_3
1	161410889	161430889	Breast_SE_336_4
1	161479526	161499526	Breast_SE_337_1
1	161499526	161519526	Breast_SE_337_2
1	161519526	161539526	Breast_SE_337_3
1	161539526	161559526	Breast_SE_337_4
1	161559526	161579526	Breast_SE_337_5
1	161716183	161736183	Breast_SE_338_1
1	161736183	161756183	Breast_SE_338_2
1	161922901	161942901	Breast_SE_339_1
1	161942901	161962901	Breast_SE_339_2
1	161962901	161982901	Breast_SE_339_3
1	161982901	162002901	Breast_SE_339_4
1	162002901	162022901	Breast_SE_339_5
1	162022901	162042901	Breast_SE_339_6
1	162131121	162151121	Breast_SE_340_1
1	162151121	162171121	Breast_SE_340_2
1	162171121	162191121	Breast_SE_340_3
1	162191121	162211121	Breast_SE_340_4
1	162211121	162231121	Breast_SE_340_5
1	162519138	162539138	Breast_SE_341_1
1	162539138	162559138	Breast_SE_341_2
1	162559138	162579138	Breast_SE_341_3
1	162579138	162599138	Breast_SE_341_4
1	162599138	162619138	Breast_SE_341_5
1	162619138	162639138	Breast_SE_341_6
1	162844306	162864306	Breast_SE_342_1
1	162864306	162884306	Breast_SE_342_2
1	162884306	162904306	Breast_SE_342_3
1	162904306	162924306	Breast_SE_342_4
1	164548104	164568104	Breast_SE_343_1
1	164568104	164588104	Breast_SE_343_2
1	164588104	164608104	Breast_SE_343_3
1	164608104	164628104	Breast_SE_343_4
1	164628104	164648104	Breast_SE_343_5
1	164648104	164668104	Breast_SE_343_6
1	164668104	164688104	Breast_SE_343_7
1	164688104	164708104	Breast_SE_343_8
1	164708104	164728104	Breast_SE_343_9
1	164728104	164748104	Breast_SE_343_10
1	164748104	164768104	Breast_SE_343_11
1	164768104	164788104	Breast_SE_343_12
1	164788104	164808104	Breast_SE_343_13
1	164808104	164828104	Breast_SE_343_14
1	165687150	165707150	Breast_SE_344_1
1	165821619	165841619	Breast_SE_345_1
1	165841619	165861619	Breast_SE_345_2
1	165861619	165881619	Breast_SE_345_3
1	165881619	165901619	Breast_SE_345_4
1	165901619	165921619	Breast_SE_345_5
1	166157184	166177184	Breast_SE_346_1
1	166177184	166197184	Breast_SE_346_2
1	167198303	167218303	Breast_SE_347_1
1	167218303	167238303	Breast_SE_347_2
1	167537762	167557762	Breast_SE_348_1
1	167557762	167577762	Breast_SE_348_2
1	167595015	167615015	Breast_SE_349_1
1	167615015	167635015	Breast_SE_349_2
1	167635015	167655015	Breast_SE_349_3
1	167655015	167675015	Breast_SE_349_4
1	167675015	167695015	Breast_SE_349_5
1	167709293	167729293	Breast_SE_350_1
1	167729293	167749293	Breast_SE_350_2
1	167749293	167769293	Breast_SE_350_3
1	167769293	167789293	Breast_SE_350_4
1	167789293	167809293	Breast_SE_350_5
1	167900561	167920561	Breast_SE_351_1
1	167920561	167940561	Breast_SE_351_2
1	167940561	167960561	Breast_SE_351_3
1	168194954	168214954	Breast_SE_352_1
1	168214954	168234954	Breast_SE_352_2
1	168234954	168254954	Breast_SE_352_3
1	169092407	169112407	Breast_SE_353_1
1	169112407	169132407	Breast_SE_353_2
1	169132407	169152407	Breast_SE_353_3
1	169152407	169172407	Breast_SE_353_4
1	169496822	169516822	Breast_SE_354_1
1	169516822	169536822	Breast_SE_354_2
1	169536822	169556822	Breast_SE_354_3
1	169861738	169881738	Breast_SE_355_1
1	169881738	169901738	Breast_SE_355_2
1	170246053	170266053	Breast_SE_356_1
1	170266053	170286053	Breast_SE_356_2
1	170286053	170306053	Breast_SE_356_3
1	170306053	170326053	Breast_SE_356_4
1	170546282	170566282	Breast_SE_357_1
1	170566282	170586282	Breast_SE_357_2
1	170586282	170606282	Breast_SE_357_3
1	170658199	170678199	Breast_SE_358_1
1	170678199	170698199	Breast_SE_358_2
1	170698199	170718199	Breast_SE_358_3
1	170718199	170738199	Breast_SE_358_4
1	171122842	171142842	Breast_SE_359_1
1	171142842	171162842	Breast_SE_359_2
1	171174405	171194405	Breast_SE_360_1
1	171194405	171214405	Breast_SE_360_2
1	171214405	171234405	Breast_SE_360_3
1	171413902	171433902	Breast_SE_361_1
1	171433902	171453902	Breast_SE_361_2
1	171573059	171593059	Breast_SE_362_1
1	171593059	171613059	Breast_SE_362_2
1	171613059	171633059	Breast_SE_362_3
1	172114319	172134319	Breast_SE_363_1
1	172134319	172154319	Breast_SE_363_2
1	172154319	172174319	Breast_SE_363_3
1	172174319	172194319	Breast_SE_363_4
1	172194319	172214319	Breast_SE_363_5
1	172214319	172234319	Breast_SE_363_6
1	172234319	172254319	Breast_SE_363_7
1	172254319	172274319	Breast_SE_363_8
1	172274319	172294319	Breast_SE_363_9
1	172294319	172314319	Breast_SE_363_10
1	172314319	172334319	Breast_SE_363_11
1	172334319	172354319	Breast_SE_363_12
1	172354319	172374319	Breast_SE_363_13
1	172374319	172394319	Breast_SE_363_14
1	172394319	172414319	Breast_SE_363_15
1	172414319	172434319	Breast_SE_363_16
1	172434319	172454319	Breast_SE_363_17
1	172523630	172543630	Breast_SE_364_1
1	172853319	172873319	Breast_SE_365_1
1	172873319	172893319	Breast_SE_365_2
1	172893319	172913319	Breast_SE_365_3
1	172913319	172933319	Breast_SE_365_4
1	172933319	172953319	Breast_SE_365_5
1	172953319	172973319	Breast_SE_365_6
1	172973319	172993319	Breast_SE_365_7
1	172993319	173013319	Breast_SE_365_8
1	173846814	173866814	Breast_SE_366_1
1	173866814	173886814	Breast_SE_366_2
1	174963245	174983245	Breast_SE_367_1
1	174983245	175003245	Breast_SE_367_2
1	175003245	175023245	Breast_SE_367_3
1	175023245	175043245	Breast_SE_367_4
1	175136629	175156629	Breast_SE_368_1
1	175156629	175176629	Breast_SE_368_2
1	175176629	175196629	Breast_SE_368_3
1	175196629	175216629	Breast_SE_368_4
1	175216629	175236629	Breast_SE_368_5
1	178022558	178042558	Breast_SE_369_1
1	178042558	178062558	Breast_SE_369_2
1	178115696	178135696	Breast_SE_370_1
1	178135696	178155696	Breast_SE_370_2
1	178155696	178175696	Breast_SE_370_3
1	178213726	178233726	Breast_SE_371_1
1	178233726	178253726	Breast_SE_371_2
1	178253726	178273726	Breast_SE_371_3
1	178273726	178293726	Breast_SE_371_4
1	178293726	178313726	Breast_SE_371_5
1	178527258	178547258	Breast_SE_372_1
1	179011970	179031970	Breast_SE_373_1
1	179072823	179092823	Breast_SE_374_1
1	179092823	179112823	Breast_SE_374_2
1	179112823	179132823	Breast_SE_374_3
1	179132823	179152823	Breast_SE_374_4
1	179251612	179271612	Breast_SE_375_1
1	179271612	179291612	Breast_SE_375_2
[truncated: 26,053 more rows]

## Sheet: Top 10% most variable SE
Top 10% most variable SE co-ordinates and size (Log2 rpkm)
chromosome	start	end	SE	010BTB	021VBT	038BT	051BTB	058BT	071BTB	072BT	079BTB	080BTB	081BT	BT20	BT549	CAL120	CAL148	CAL51	HCC1187	HCC1395	HCC1806	HCC1954	HCC2688	HCC38	HMEC_2	HMEC_1	Hs578T	hTERT_HMEC	MCF10	MCF7	MDAMB157	MDAMB231	MDAMB436	MDAMB468	MFM223	MX1	SUM149PT	SUM159PT	T47D	vHMEC	VP303	Normal_Basal	Normal_Lum_mat	Normal_Lum_Prog	Stromal	ZR75
1	915298	935298	Breast_SE_1_2	0	0	1.26857	0	2.90595	5.114	3.39158	2.80477	0	0.700579	3.95849	5.74507	0	6.63548	5.69568	4.8916	2.74133	3.72536	0	4.70831	4.86752	1.68165	0	4.34976	0	0	6.71548	5.12929	0	0	1.87503	5.72069	0	1.01049	5.19503	4.44894	1.53503	5.39369	0	1.73067	0	2.84848	5.60628
1	935298	955298	Breast_SE_1_3	0	0.706161	0	0	3.04911	4.82262	3.74225	3.8052	2.15912	2.59776	4.30481	6.9459	0	5.65897	6.73993	3.85889	1.97429	4.97651	0.253568	4.41115	5.86312	1.63804	0	6.01266	0	0	6.73591	5.90055	0	0	3.16609	3.86462	0	3.64043	5.06814	2.83586	1.78901	4.40198	0	0	0	0	5.64916
1	1055298	1075298	Breast_SE_1_9	3.32157	2.94477	3.8909	3.17836	3.45046	6.08526	5.32727	5.66036	3.42753	4.64815	6.01936	0	3.57057	6.39148	5.44211	5.57456	5.18515	7.84468	2.78951	5.95429	5.06923	2.96552	2.22907	4.61428	5.11756	2.91537	7.59701	4.78588	5.21786	6.4674	7.88686	5.53601	2.48134	5.90383	6.59221	4.96863	3.02507	5.76996	0	6.13069	4.81244	3.83089	3.97026
1	1135298	1155298	Breast_SE_1_13	3.41818	2.76167	2.64626	2.91855	4.30892	5.35904	4.53111	3.29118	2.9833	2.51439	0	0	0	3.866	5.38717	2.12786	0	5.64298	0	0.410535	0	1.18992	0	0	0	0	3.95929	1.36174	0	1.26066	6.71275	2.53829	5.49733	0	0	0.0767232	1.13811	0	0	4.86744	3.6162	3.07655	3.71516
1	1155298	1175298	Breast_SE_1_14	5.36156	4.921	5.16441	5.19242	6.12066	6.71473	6.70865	7.12565	5.31022	6.37759	5.49326	3.49966	4.62138	7.77386	7.08831	7.9979	5.69166	7.79277	1.87052	7.44095	6.09937	3.32445	5.22374	4.49328	2.69832	3.42233	7.10856	2.0702	5.09291	5.90534	8.68166	3.81966	6.58331	6.79108	2.94335	4.75313	3.07608	0.133138	0	5.50601	4.84743	3.68309	4.89299
1	1195298	1215298	Breast_SE_1_16	3.80399	4.29052	3.69159	3.86879	5.32984	6.38901	6.47964	5.0865	3.71744	4.17725	1.72483	0	2.36161	3.86214	4.46543	5.7369	3.40803	6.25797	0	3.03201	3.80541	3.00636	0	3.33518	0	0	3.50191	4.43768	0	5.59992	5.75212	1.66721	0	2.49102	5.05417	0.883366	2.58723	0	0	4.72253	2.41591	4.5961	1.27875
1	1415298	1435298	Breast_SE_1_27	5.76292	4.54569	5.53956	4.72296	6.31765	6.94021	6.01247	7.43251	5.11016	6.88256	6.95291	1.11379	1.47272	7.87458	4.95208	7.68616	3.20099	7.58958	5.32052	7.53955	6.52752	4.20111	5.36157	2.72867	3.07159	1.32505	5.31366	5.77633	5.37626	4.87143	7.4086	6.49614	6.98867	4.58967	1.98618	4.81608	3.25679	7.00291	3.94821	5.04729	4.77844	4.19612	4.14562
1	1435298	1455298	Breast_SE_1_28	2.75914	1.52677	3.22151	2.36675	4.23523	4.57728	3.61728	4.84911	2.60404	4.44885	4.32249	0	0	5.40965	4.65047	5.49414	1.9553	4.90471	0	4.99799	3.60889	2.31218	0	0.229621	0	0	3.27761	3.87486	0	0	5.13351	3.71104	3.78756	0	0	2.71743	1.76826	4.08968	0	1.39975	0	0	2.44217
1	2279037	2299037	Breast_SE_3_9	4.56307	4.17605	4.98117	2.7164	4.37747	5.09582	4.91406	5.51003	4.16948	4.36637	0.857067	1.77842	1.42519	1.99742	4.65599	2.42111	5.26763	4.04085	0	0	4.02408	3.51402	4.98438	4.75838	5.20371	1.32539	3.01752	5.4101	5.473	4.63604	3.40408	0.648782	0	4.57084	6.47914	0	2.55177	0	3.62891	3.12248	2.26453	5.17801	1.42195
1	2419037	2439037	Breast_SE_3_16	0	0	0	0	0	2.15983	0	0	0	0	0	0	0	5.38171	0	0	0	4.34111	0	3.69968	0	3.65257	6.54267	0	6.02095	5.77216	0	0	0	0	0	0	0	0	3.6849	0	3.6209	0	0.573059	2.67699	0	0.328839	1.34649
1	2439037	2459037	Breast_SE_3_17	0	0	0	0	0.0896624	2.62407	2.23276	1.72602	0	0	0	0	4.91688	5.20472	0	0	0	4.80913	0	0	0	2.84883	6.04777	6.75858	7.21351	0.864872	1.19979	2.99143	6.95088	0	0.884147	0	0	0	6.16481	0	3.17722	0.234853	0	0	0	1.30574	2.3145
1	2479037	2499037	Breast_SE_3_19	0	0	1.31306	0	2.71899	5.38853	5.54596	3.50648	0	0	0	0	0	7.70227	1.99345	3.00088	0	4.16712	0	6.21482	0	1.66745	1.5093	0	4.1968	0	0.847542	3.01333	0	0	3.28574	1.51308	0	1.00719	1.45076	0	1.53119	6.55667	0	0	0	0	4.16411
1	3449793	3469793	Breast_SE_5_1	2.03697	3.06309	3.55717	1.6224	2.98266	4.67024	5.11657	3.81161	2.68736	3.39257	4.80308	0	0	5.83826	4.74989	6.69262	4.85084	5.67203	0.191163	5.42228	4.08265	3.46895	5.43759	1.5336	0	4.66065	5.29896	3.03428	0	5.81724	6.01788	6.07566	0	4.08254	5.01134	3.01073	2.34691	4.37419	0	5.27562	0.804439	3.04726	4.35047
1	3489793	3509793	Breast_SE_5_3	2.98229	2.22332	3.38978	1.41266	2.92615	3.88816	3.72419	4.40307	2.28895	3.46162	0	8.1958	4.8837	3.65355	1.8765	3.83191	3.81869	5.05738	0	1.8721	3.41054	0.874548	0	6.62818	4.54568	1.55616	3.27196	4.75094	4.81288	6.69688	4.83151	4.91139	0	0	6.0115	0	0.266874	1.31148	0	0	0	1.77081	2.28256
1	3509793	3529793	Breast_SE_5_4	0.391173	0	2.44821	0	2.04653	3.4358	3.77173	4.47352	0	3.30964	0	7.83566	3.70822	4.84284	2.70854	3.50021	2.79305	2.74928	0	3.30593	3.53484	1.83206	0	4.37135	0	0	1.43972	4.90111	0	3.82683	4.16194	1.75177	0	0	4.0091	0	0.203578	2.29687	0	0	0	3.00236	1.00136
1	3649793	3669793	Breast_SE_5_11	0	0.64699	0	2.92302	2.50343	3.80902	4.4357	1.14918	3.44674	0.756179	2.38608	0	4.50963	5.55193	4.50671	0.254105	0	5.76853	0	3.20529	0	2.15567	0	0	0	2.36231	4.11212	3.24206	1.54281	3.77218	5.05862	3.98535	0	0	5.25241	2.46548	1.39656	2.73877	0	0	0	0	2.08256
1	3689793	3709793	Breast_SE_5_13	0	0	0	0	0	3.5027	1.65119	1.23386	0	0	4.14134	0	0	1.77225	2.26915	0	0	6.45388	2.77345	0	0.176426	4.05333	6.04427	0	4.72967	6.75688	2.60908	1.57802	0	0	6.01056	3.25648	0	0	5.56241	2.20074	3.7904	0.499656	0	0	0	2.28093	0.883604
1	3709793	3729793	Breast_SE_5_14	0	0	0	0	0	2.1169	1.87424	0	0	0	0	0	0	1.07363	0	0	0	5.56882	2.81036	0	0	3.58111	5.60581	0	5.37933	6.65224	1.15971	1.27529	0	0	4.71694	3.21819	0	0	5.98952	0	2.98267	0	0	1.27955	0	2.03349	0.211812
1	6412309	6432309	Breast_SE_6_13	0	0	2.44631	0	5.05461	4.13791	5.07158	4.01172	3.44916	3.93902	3.60052	0	0	4.70826	1.75018	7.70491	0	5.33294	5.36868	3.80552	0	3.74828	6.00376	0	4.99258	6.11952	4.81963	2.80972	3.65569	0	5.8842	6.15178	0	4.61016	0	3.51333	3.46803	4.59425	0	5.62926	3.65356	2.02759	4.49622
1	7464340	7484340	Breast_SE_9_6	3.95694	2.46349	4.83664	0	2.34747	2.8445	2.51573	2.8474	3.76335	2.26852	2.81053	5.80318	6.12429	2.00567	0	0	6.55988	0	1.62876	0	4.20468	3.19471	3.58921	6.59414	0	0	1.39553	6.52473	0	2.76927	0	2.35262	0	6.7913	5.2822	0	1.42491	0	3.35087	4.7613	2.47436	4.05707	0.12777
1	7544340	7564340	Breast_SE_9_10	0	0	0	0	0	0	0.235586	0	0	0	3.71492	1.78783	5.27184	3.81609	0	0	5.07747	0.451328	4.12803	1.11023	3.34373	1.84527	3.87615	0	0	0	0	3.01058	0	4.60343	0	1.07497	0	6.4638	4.49868	0	0	2.89641	2.6843	0	1.10584	3.74444	0
1	8079281	8099281	Breast_SE_10_8	4.92339	2.52196	4.60204	2.47148	2.36306	3.12291	0	3.99367	2.95495	3.59703	2.69713	6.78667	4.14088	0	4.34885	0	5.33633	0	6.91125	0	3.6338	3.69619	5.3369	5.60589	3.58987	2.95232	1.65417	2.28779	6.77873	3.07896	4.07358	0	3.44699	6.30802	5.51553	0	3.88102	0.107988	2.19874	3.10826	2.73102	2.31285	0
1	8099281	8119281	Breast_SE_10_9	4.09685	3.16532	3.93421	3.40289	4.2194	4.07873	3.15393	3.79232	2.11472	4.33241	2.7901	5.70679	0	0	5.82879	5.90049	4.3221	0	6.01408	0	2.76202	2.42048	0	4.01328	0	0	2.31255	4.76586	4.42776	0	4.64767	0	4.82823	4.67209	3.30093	0	1.98911	0	0	2.68556	2.44575	2.71289	0
1	8119281	8139281	Breast_SE_10_10	5.5598	3.94305	5.31615	4.37286	5.11225	4.84265	3.14726	4.40097	3.87672	5.40021	5.17087	6.56308	0	0	6.29762	6.43374	6.27038	0	7.85712	1.66705	4.84701	4.15792	4.04815	4.93358	2.14267	0	2.2336	5.1034	6.57612	0	5.69621	0	5.48976	7.40057	5.44848	0	3.65742	0	3.23415	2.81968	4.37486	3.15265	0
1	8139281	8159281	Breast_SE_10_11	5.01528	4.00069	4.06051	4.82816	4.99886	4.10013	3.12602	1.18374	4.66617	5.46428	2.39886	5.30122	0	0	5.17429	6.18353	4.28183	2.05	5.10379	0	3.59756	3.23444	2.06039	0	0	0	1.73009	4.53484	4.83159	0	4.64383	0	5.54376	6.40154	3.32709	0	2.61307	0	2.85482	3.54778	4.04556	2.30109	0.151621
1	9151476	9171476	Breast_SE_13_7	4.46131	4.4009	4.49974	3.37267	4.45819	5.61435	4.93873	5.68952	4.10391	4.94188	4.0771	5.38994	3.07063	4.58964	3.43093	0	4.19927	0	5.23618	6.06002	4.02985	1.10742	0	3.43697	0	0	4.80703	2.67523	4.11764	0	4.68173	5.6258	0.69377	4.34763	5.13191	3.79234	1.1184	5.69527	3.29191	6.17608	4.79105	4.35897	3.63603
1	9171476	9191476	Breast_SE_13_8	4.49457	5.07979	4.85067	4.72841	4.74033	5.58193	5.60017	4.31687	4.32325	5.04411	3.09284	0	0	4.95124	5.30715	0	0	4.56818	2.07095	4.75255	2.07222	2.70112	5.43851	0	4.5686	5.49961	5.3334	1.5195	0.842106	0	4.50268	5.97451	1.4282	1.22308	3.8266	3.92686	3.18109	4.56241	0	3.92106	1.91717	0.27694	4.53801
1	9430702	9450702	Breast_SE_14_11	5.01647	3.45187	5.22736	4.22325	4.71031	5.13422	3.85708	6.28848	4.95156	4.40781	3.42446	0	0	0.741444	0	4.98181	0	0	4.74169	2.72649	2.15802	4.02258	3.42817	0	0	4.71917	4.40542	5.37134	1.4215	0	1.40636	0	3.9773	0	0	0	2.39719	2.79005	4.86828	4.95694	4.82062	3.09384	2.89066
1	9836872	9856872	Breast_SE_15_9	3.80142	3.38263	2.08214	5.35204	3.23134	5.51495	4.62977	4.80259	3.99739	4.86731	4.7407	0	0	5.74116	0	4.68738	0	0	4.29193	5.88272	2.7429	3.59661	5.56575	0	0	3.29549	2.78287	2.44974	0	0	5.26345	6.56659	5.37876	3.52663	0	0	2.78539	4.59757	4.42944	4.32213	4.08158	1.50801	2.91401
1	10503212	10523212	Breast_SE_18_4	1.50556	2.89735	1.8475	2.27133	2.84164	4.58612	3.45696	4.68011	2.41988	2.46728	2.02703	5.96735	5.02371	0	0	0.271156	2.75674	0	5.39364	3.877	4.23928	1.98069	3.74105	3.93166	1.21801	0	4.78677	4.38289	4.51982	2.32169	2.43676	6.4267	2.64337	3.71125	4.8783	4.70586	2.33291	6.46909	3.11042	4.75056	3.25921	0	4.64157
1	10627142	10647142	Breast_SE_19_3	0	0	2.77277	0.562308	3.36771	6.32215	5.68298	6.927	2.69555	4.23865	0	1.42312	3.39878	4.46825	4.09547	5.26732	0	5.73983	4.47931	6.63054	2.39457	4.1423	6.19006	4.93565	5.63266	5.86671	3.43878	6.94904	0	0	6.1791	6.96846	0	6.44476	3.28693	3.96253	3.90237	7.62196	3.98516	6.1745	4.17344	2.91562	5.03692
1	10667142	10687142	Breast_SE_19_5	0	0	1.77956	0	3.34973	6.19871	4.81113	5.94433	1.00431	3.37633	3.37952	0	1.5921	8.04745	3.57149	4.46049	0	3.99339	0	8.07017	3.25905	2.54346	0	0	0	0	4.06295	4.56063	3.20136	3.11359	6.21625	6.91654	0	2.64403	1.71199	3.64941	1.57562	8.21994	0	6.11937	4.64631	1.26587	5.22132
1	10687142	10707142	Breast_SE_19_6	3.49605	1.74781	4.27118	5.84881	6.13829	5.78428	5.8529	6.30512	5.22104	5.48237	5.67278	0	2.49797	7.69365	4.18282	6.56325	0	5.35264	5.02908	7.86381	5.14227	3.2343	0	0	0	0.0867354	5.54202	3.80271	0.231947	1.32437	6.6491	5.77718	7.14343	5.0471	0	3.65858	2.1974	7.75249	0	6.14013	4.83057	0.555831	4.93857
1	10707142	10727142	Breast_SE_19_7	0	1.06483	2.2107	2.92878	5.02556	5.38783	4.47637	5.13423	2.27328	4.0094	4.74551	0	0	6.43829	1.69666	6.84018	0	0	1.2725	7.1058	3.43444	2.97758	0	0	0	0	2.68735	3.75658	0	0	5.93542	4.62291	4.80145	3.64396	0	2.56769	1.52202	7.57108	2.28718	5.93576	3.70787	3.522	3.47907
1	10727142	10747142	Breast_SE_19_8	2.12872	0	1.06106	3.12757	4.28026	5.13742	2.85179	3.44429	2.50615	3.16311	2.88327	0	0	5.24112	0.785615	5.38924	0	0	0	6.04738	3.05769	2.89319	3.64614	0	0	3.50962	2.99034	1.2554	0	0	5.7729	5.02729	5.82309	1.92389	0	0.348305	1.71962	6.19422	2.03267	6.07991	3.67992	2.61253	2.53775
1	10767142	10787142	Breast_SE_19_10	0.155312	0	2.68289	4.4759	6.68647	4.14793	4.4374	1.37894	4.67958	4.74735	0	0	0	5.71011	0	5.4391	0	0	3.51705	6.21216	3.80134	2.80354	0	0	0	0.790051	4.07864	0	0	0	5.35324	2.79813	7.67656	4.57075	0	2.94106	1.00451	5.86682	2.82886	5.7199	4.07707	0	2.3808
1	10787142	10807142	Breast_SE_19_11	1.81282	0	2.47444	4.43094	5.40161	5.27324	5.56049	4.5389	3.79696	2.97653	4.55174	0	1.64588	7.15237	0	6.84191	0	3.47555	0	6.72233	2.77118	3.31064	3.27013	0	0	5.37834	5.4185	0	0	1.37107	5.93174	6.06802	5.56818	4.04732	0	4.0245	2.65031	6.98676	2.39835	5.36535	4.14004	1.59975	4.48635
1	10884569	10904569	Breast_SE_20_1	2.68667	4.81795	3.11213	3.10013	5.74586	3.87582	4.06763	5.45725	3.13394	4.55138	6.08801	1.38462	0.753697	6.84376	0	7.25131	4.21923	5.30595	5.69985	5.05015	5.38213	3.64889	5.88821	2.20279	3.64168	6.19076	5.7991	4.69482	0	3.41591	5.71627	5.87053	6.87821	6.48394	0	2.62737	2.91836	6.20829	3.79456	4.51904	4.56017	0.85453	3.39301
1	12436773	12456773	Breast_SE_27_6	3.47734	1.99222	3.09473	1.67265	3.6447	3.61791	0.235745	3.07787	3.2676	3.48969	5.61595	6.16905	3.45083	0	3.65423	0	3.2394	0	7.82167	5.43088	5.92957	2.44607	1.24964	4.29902	0	1.9612	0	0	1.86439	0	4.90471	0	6.20549	3.99151	2.07974	0	3.29869	0	3.14397	1.73672	2.4324	2.03626	0
1	12456773	12476773	Breast_SE_27_7	3.29184	2.61478	3.19426	1.49386	2.1788	3.51172	0	3.5716	2.91487	2.91983	4.8487	5.6875	1.68774	0	3.58923	0	0	0	6.46011	5.77434	4.94392	1.73963	0	3.01508	0	0	0	0	1.93893	0	4.03873	2.28321	3.97039	4.19796	0	0	2.88027	0	3.02207	3.05876	1.94506	2.60634	0
1	12476773	12496773	Breast_SE_27_8	3.33254	0.155284	3.36887	2.99337	3.60809	4.50805	2.52706	4.26721	3.13985	3.98191	6.22891	5.83527	3.94858	0	5.69822	0	1.1736	2.07828	7.16476	6.34888	6.24395	2.97799	1.76728	3.45845	0	1.20531	2.51845	0	4.07907	3.61794	5.28424	3.83242	5.69101	6.77633	2.54188	0	3.31974	1.58897	3.41247	4.41329	3.99595	3.72813	0
1	12536773	12556773	Breast_SE_27_11	3.93164	3.07586	3.82161	2.15487	4.28032	4.06978	3.16202	5.01207	3.89628	4.55733	6.14188	6.55786	2.85183	0	6.5839	1.56707	5.19246	5.12943	2.88354	5.09789	6.26144	2.47073	0	5.14726	0	0	2.76025	5.23268	3.8694	3.95482	6.16003	1.67021	0	5.41509	0	0	0.879337	2.18959	4.31145	4.37701	2.70748	4.57785	0
1	12556773	12576773	Breast_SE_27_12	2.01888	3.09645	1.79704	0	2.60224	0	0	1.27869	0.828137	3.1273	4.75239	5.67638	0	0	3.68217	0	4.50035	0	4.976	4.95159	5.0967	1.71067	0	2.88741	0	0	0	4.05457	1.03886	0	4.38478	0	2.22566	5.42735	2.37025	0	0	0	3.34525	2.78519	0	3.31644	0
1	12576773	12596773	Breast_SE_27_13	4.68054	4.11859	3.86611	3.94734	4.16026	4.53207	4.26043	5.47151	4.26174	4.56385	5.65446	5.722	0	0.815794	4.92347	3.51055	6.07837	4.60411	4.98472	6.49883	6.13538	3.73457	0	5.0397	0	4.71619	3.16056	3.90912	3.63537	5.47847	5.8046	0	0.714394	6.65433	4.86728	0	3.32867	4.02583	4.23881	3.46937	3.70019	3.95709	1.53506
1	12596773	12616773	Breast_SE_27_14	4.2858	4.21899	4.26608	4.63537	4.61593	5.2346	4.77467	5.42869	4.45888	4.51044	5.76481	6.04318	0	0	4.84337	4.02329	5.92753	3.09968	5.70518	6.46439	6.2282	3.58904	0.0910214	4.58821	0	2.16749	1.50525	2.85075	4.46869	4.44847	4.8651	1.35919	4.88199	6.92304	5.44368	0.503768	3.43174	4.55881	3.83113	4.33249	3.3053	3.74145	2.38536
1	14909445	14929445	Breast_SE_30_3	3.56789	2.28757	3.45213	5.32004	0	3.89776	3.50652	4.16402	3.88792	3.78599	5.07571	0.865413	1.70527	5.30496	3.27749	1.8067	3.21088	0	5.63168	5.50308	3.70246	3.85744	5.46387	0	0	2.9083	2.54359	0	0	2.98967	4.67143	2.83909	5.84634	0	0	1.87173	3.0719	5.31137	3.84799	4.49247	4.11815	3.25226	3.53267
1	14929445	14949445	Breast_SE_30_4	4.18438	3.57208	4.84173	5.22851	2.60163	3.91241	3.61058	4.33872	3.90613	4.07748	5.15755	2.63574	4.23157	4.578	4.14994	1.86208	0.797408	1.71936	5.11625	6.12894	4.37427	2.99515	1.80801	5.03469	0	0	0	3.85851	4.04854	4.42862	4.82758	0	4.4358	0	0	0	1.14141	2.90859	5.05155	4.95002	4.5128	3.88907	0
1	15335639	15355639	Breast_SE_33_2	1.9323	1.62552	2.55701	0	1.3265	4.35637	3.4275	2.15734	1.18183	1.2741	2.884	0	4.44424	0	4.62716	0	5.62183	1.87743	3.61114	4.30912	2.46784	2.2941	4.36096	4.60207	0.781408	1.92124	0	4.28266	6.04117	2.94199	3.53693	4.50935	0	6.77375	6.09664	0	2.52444	1.3593	2.46188	0	0.575487	0	1.11515
1	15746394	15766394	Breast_SE_36_5	4.11968	3.91281	4.65387	5.81368	4.17332	4.96899	4.45862	4.65717	4.42824	4.78123	3.91502	3.3563	1.8891	5.33481	4.38684	3.70937	4.59169	5.35762	0	4.92438	5.2795	4.50723	6.65216	6.70296	6.30255	5.93855	2.74135	5.5324	3.88359	5.07815	4.97439	0	0	4.77276	5.87959	0	3.68954	0	0	3.61068	3.51431	3.83372	0.319797
1	15946394	15966394	Breast_SE_36_15	5.80904	5.24517	5.10241	4.44242	5.18717	5.66152	5.43469	5.50069	4.70693	4.98418	2.97899	2.5514	6.51208	0	1.60387	4.96254	6.35087	2.03835	0	3.87409	5.61531	3.79236	6.01597	6.6863	5.607	5.44208	0.294437	4.54256	5.73572	4.79248	3.17639	1.42441	0	6.01682	7.0064	1.23757	3.41064	1.9696	3.2189	3.73684	2.52445	4.39111	0.993489
1	16125388	16145388	Breast_SE_37_8	2.71841	1.48017	3.07663	0.952898	2.94896	3.78688	3.95948	4.18863	2.42602	3.62859	5.74818	6.90069	6.77288	1.4355	4.56353	1.9975	5.94903	3.78894	4.16154	5.68894	6.21574	3.54601	5.91414	6.00349	5.93268	4.37713	4.04655	5.51624	7.05747	5.08751	5.24508	3.23029	0	6.86071	6.62196	0	2.4563	2.14041	0	3.0665	0.964612	3.63095	0.578201
1	16960414	16980414	Breast_SE_39_5	3.75334	5.28695	4.74024	4.35136	5.16675	3.58092	3.97521	4.37669	4.03733	5.08188	0.52533	5.23892	0	3.66771	4.90847	4.93124	6.17689	3.98026	0	3.55825	3.2619	3.70305	0	4.74745	1.88651	0	2.06141	5.25747	1.90374	0	4.6113	1.84143	0	4.23969	3.76386	0	2.30998	2.07434	0	0	0	3.39261	0.691667
1	17085073	17105073	Breast_SE_40_3	5.09051	1.97848	2.8073	6.33999	2.58154	3.9635	3.96999	5.23492	3.99606	5.51333	5.41275	0	0	5.49096	0	4.65516	0	0	5.45784	4.54104	3.18431	1.69669	0	0	0	0	0	0	0	0	4.82152	5.27454	6.58967	4.74726	0	1.522	0	4.0177	4.69463	0	4.46528	0	4.24518
1	17105073	17125073	Breast_SE_40_4	4.86227	4.03039	3.56407	7.05628	4.0944	5.05239	5.26412	2.75818	4.76888	5.71071	2.76939	0	0	5.73895	0.824666	3.9849	2.09701	0	4.81281	5.77159	3.18776	0.925624	0	0	0	0	0	1.6854	0	0	5.85856	6.47492	5.76793	0	0	0	0.716076	4.67727	3.8545	0	4.46403	0	4.88147
1	17165073	17185073	Breast_SE_40_7	1.41528	0	1.74086	0	0	0	0	0	0	0	2.45134	4.53746	5.68619	0	0	0	5.48502	0	5.57108	0	4.60807	2.29423	1.67597	5.00245	2.14628	0	0	1.26041	4.2093	0	3.52682	1.03602	0	2.16007	3.76586	0	2.25074	0	2.70976	0	2.93923	0	0
1	17185073	17205073	Breast_SE_40_8	3.34394	0	3.77733	3.66674	0	1.12751	0	2.65665	0	0	2.75872	6.10207	6.68103	0	4.36734	0	6.53044	3.29871	7.0041	3.8085	4.63792	3.60048	5.4346	5.26887	4.64049	3.18818	0	2.48086	6.01289	0	5.58867	5.25048	0	3.88718	5.00015	0	3.00779	0.876226	0.865999	0	2.25026	0	0
1	17205073	17225073	Breast_SE_40_9	0	0	2.20474	0.737055	0.300668	2.43309	0	2.59055	0	2.23974	5.19672	4.44857	6.27609	0	3.52217	0	5.90896	3.53863	6.0925	2.7847	4.65882	3.65265	5.09146	1.65951	3.30445	0	0	1.75819	4.81174	0	5.82253	3.57303	0	5.24026	5.4716	0	2.61933	0	0	0	1.00071	0	0
1	17225073	17245073	Breast_SE_40_10	3.43352	2.16234	3.11137	2.47366	3.43198	4.52973	2.70313	5.11152	0.383495	3.32723	5.71922	6.26103	6.0982	3.45257	4.53148	0.963452	6.57183	2.14842	6.62489	4.40491	5.65039	3.81219	5.33218	4.66145	4.47329	1.94242	3.36222	3.59245	4.19299	0	5.87568	5.26465	0	5.59756	5.77646	0	3.46526	4.27565	1.94502	3.70778	0.336697	0	0.888221
1	17388699	17408699	Breast_SE_41_2	0	0	0.337433	0	1.56157	3.84471	3.11526	2.94556	0	1.09079	2.7315	0	0	6.03287	0	0	0	0	2.11133	4.86734	1.3449	1.8192	2.72191	0	0	0	3.6475	0	0	0	3.64402	5.43259	0	0	0	3.43063	1.03305	5.92684	0	2.42762	0	0	5.0887
1	17408699	17428699	Breast_SE_41_3	1.42099	1.9809	0	1.73669	4.0845	4.01221	3.81498	3.13543	2.27416	4.4254	4.08851	2.41683	0	5.60532	1.62814	4.05337	0	0	1.95352	5.78473	4.06411	1.28844	0	0	0	0	4.87518	0	0	0	4.24616	3.70971	2.54642	0	0	4.40278	0.204326	6.17675	0	1.61938	1.79158	0	4.82654
1	17522473	17542473	Breast_SE_42_3	4.69465	6.29685	4.85258	7.44175	4.94075	4.0764	4.48347	3.17557	6.61153	6.29419	3.44925	0.532301	0.259345	5.92956	0	6.6258	5.71153	4.60289	4.69548	4.7896	4.08635	1.66769	0	4.45177	0	0	6.16902	4.24332	1.97809	5.27776	5.81331	4.07228	6.42841	1.86753	4.9234	2.8531	0.59206	4.01354	4.23021	5.561	5.52389	3.97062	1.85922
1	17542473	17562473	Breast_SE_42_4	4.28251	4.69564	4.0485	6.00405	3.91997	4.11484	3.58604	1.45155	5.80729	5.46309	4.58768	0	0	1.34693	0	5.02779	5.99511	4.35599	5.74941	4.49003	4.79489	0.599164	0	4.95335	0	0	5.81161	0.455727	3.87608	4.31821	5.25903	0.413227	3.75275	3.80396	5.55358	1.32933	0.325559	3.00072	3.56446	5.27617	4.63982	4.26071	1.50086
1	17562473	17582473	Breast_SE_42_5	5.01106	5.56027	5.14099	5.84561	4.56006	4.85439	4.36123	4.17447	6.49477	6.40156	3.89423	0	3.26112	4.3435	0	5.39167	6.11916	3.40418	5.80321	5.35162	4.57803	1.77993	0	4.68288	0	0	4.50842	3.65909	4.1482	4.0278	5.60397	3.93945	5.28678	3.16417	5.68387	1.76773	0	3.35217	4.61278	5.55332	5.37764	5.19384	1.44604
1	17622473	17642473	Breast_SE_42_8	4.8013	6.2809	4.41304	4.88986	4.89002	5.45212	5.97155	3.60941	5.60221	5.51223	2.38302	0.741912	0	0	0	5.50741	7.35881	0	0	0	2.97524	0.973259	0	4.16203	4.45941	1.20702	0	0	0	3.23395	2.18804	0	0	3.5769	4.80244	0	1.19413	0	0	2.96086	3.49871	0	0
1	18476803	18496803	Breast_SE_45_2	0	0	0	0	0	0	3.58191	3.44793	0	0	4.3186	0	0	6.6155	4.31906	0	0	0	3.92678	5.66489	2.23174	0	0	0	0	0	3.13698	0	0	2.04621	0	5.93372	0	0	0	3.21009	0	5.52258	2.04998	4.733	1.76707	0	3.96276
1	18926154	18946154	Breast_SE_46_4	5.53979	4.47242	5.01305	5.10691	6.47274	5.69964	4.7381	5.17375	5.53986	5.33799	2.96806	4.85584	6.59324	6.16566	0	4.10294	7.51851	0	5.07818	2.86362	5.55704	4.70943	7.12498	5.46066	5.61337	4.19708	2.04827	3.99902	5.80753	3.62046	4.7038	4.29209	5.18602	5.57856	5.52376	0	3.67505	1.57192	4.97999	4.83436	3.72293	4.69943	3.83929
1	19062375	19082375	Breast_SE_47_3	4.85424	5.08464	4.50512	4.58387	5.11898	4.14231	4.05119	6.43792	4.78022	4.59776	1.96584	0	4.53975	5.34669	0.735574	3.3458	2.76561	0	4.1851	5.32404	4.30771	4.11599	5.30302	0	0	5.79677	0	0.464821	4.72785	0	3.68058	0.805434	5.81473	0	4.29796	0	2.64588	0	4.23544	3.81415	4.12959	2.14785	0.990828
1	19629594	19649594	Breast_SE_50_2	4.16736	3.86139	4.94662	5.3632	4.34881	4.93967	4.17133	4.99308	4.09562	3.98928	0	2.08469	3.6967	0	0.869087	4.09524	0	4.80791	0	0	2.34005	3.43109	5.29968	3.45539	5.09839	6.27659	2.48961	3.48688	3.53635	5.23134	4.03245	0	4.81738	5.04047	3.26782	1.21147	2.90736	0	3.45741	4.21574	3.77169	3.86369	1.39751
1	20200135	20220135	Breast_SE_52_4	0	0	0	0	0	1.6615	0	2.50859	0	2.4604	5.15145	0	0	1.55203	0	0	0	0	6.81444	1.89351	4.47682	2.63595	4.49759	0	0	0	0	0	0	0	3.15673	0.842751	0	5.79793	0	0	2.68142	1.98058	4.35243	0	3.24945	2.05953	2.43531
1	20466593	20486593	Breast_SE_53_1	0.653032	0	2.3389	0	0	5.57141	4.70086	4.36818	0	1.37386	6.0101	0	0	5.84823	3.56513	6.36105	0	4.99951	4.13519	3.43269	4.29812	3.46907	5.39735	3.65542	5.03827	0	4.68305	2.55737	2.62832	4.40524	4.18713	6.71488	0	5.4742	4.05201	3.37488	3.38177	6.3653	2.86329	4.18633	2.30559	3.95138	4.16435
1	20587838	20607838	Breast_SE_54_2	1.85929	0	0	2.3605	0	0.77996	0	0	0	0	2.15189	0	5.05445	0	0	0	2.75373	0	2.4611	0	0	2.92391	4.39184	4.71626	0.138435	0	0	0	4.85365	2.39135	2.50497	1.21876	0	6.24979	6.14701	0	3.12578	0	0.900533	0	0.508615	1.61577	0
1	20728802	20748802	Breast_SE_55_2	2.68701	3.4544	2.58001	0	2.69737	2.36127	2.8609	2.59012	2.27349	2.29256	0.672333	4.17655	5.92069	0	1.89503	0	5.58458	3.05278	1.49207	0	2.541	2.98375	5.73466	3.39262	5.58158	4.27689	2.31802	1.62904	5.52695	5.02207	0.529582	0	0.153427	2.59846	4.87395	0	2.86703	0	3.31811	3.32749	2.65227	3.78754	0
1	21252925	21272925	Breast_SE_56_3	4.2363	3.24319	4.99073	2.49145	5.14244	4.62054	4.32674	5.82357	4.14456	4.10812	5.18673	0	6.10407	1.41492	1.87637	3.8852	5.62639	0	2.28283	5.63229	3.99899	3.25863	3.43423	5.69203	3.72914	0	3.32461	3.27161	5.89677	2.42904	4.87973	1.81334	0	3.98872	6.12289	0	1.96409	5.26706	4.4478	5.4079	3.71474	5.07164	1.36306
1	21619664	21639664	Breast_SE_58_5	3.07665	0	1.93688	2.29849	3.74732	4.74621	3.98679	7.13544	1.64099	3.53477	6.14249	0	2.72046	7.21717	0	0	4.64381	3.84673	5.80243	6.48646	4.93975	1.24952	0	0	0	0	4.84039	1.22628	0	1.80151	4.90227	7.90265	2.60987	4.71358	0	2.75302	0.224685	7.91592	0	5.49604	4.74672	2.89402	3.82394
1	22826274	22846274	Breast_SE_62_6	2.98058	0	1.24444	1.33365	3.21613	2.68002	3.44937	4.53375	0	4.02198	5.05664	0	3.67044	5.0684	0	1.45627	0	2.65635	6.40705	3.67729	4.99478	3.58133	4.95115	0	0	4.56922	4.6894	0	3.42499	0	5.85465	2.86364	0	4.84391	3.54816	2.00468	2.70609	4.35631	3.88133	3.57715	3.82656	1.74478	1.282
1	23194670	23214670	Breast_SE_64_3	3.48533	0	4.47977	2.86053	0	0	0	0	4.48021	0.847739	3.84837	4.15832	4.02636	0	0	0	5.87014	0	5.14873	0	4.37295	3.05741	3.93562	5.801	1.45334	0	0	4.18375	5.0478	1.3967	2.80797	0	0	6.1271	5.68699	0	2.85934	0	2.1031	0	0	0.165811	0
1	23423551	23443551	Breast_SE_65_6	1.23676	0	2.30052	4.1385	3.46806	2.84931	4.44404	1.99992	3.69231	3.26085	1.63261	0	0	6.00594	3.83133	0	2.4016	2.29999	0	5.5302	2.73723	1.57776	0	0	0	0	0	4.7667	1.83628	0	5.01926	5.41098	0	0	0	2.58253	1.25179	5.0774	0	0.920258	1.17874	2.45416	4.746
1	23443551	23463551	Breast_SE_65_7	2.16147	0	3.01987	3.34837	3.19803	2.94543	2.0188	2.77751	3.81616	3.86357	3.4566	3.11357	0	5.25281	0	3.15122	5.1668	0	2.98194	5.33148	4.17995	0.688919	0	0	0	0	3.46453	4.20331	0.476203	0	2.52233	5.42992	4.64682	3.30441	4.00572	3.09742	0	5.4086	2.8175	1.40147	2.92424	3.59387	4.58816
1	23563551	23583551	Breast_SE_65_13	4.37859	3.37271	5.20496	2.39318	3.43654	4.35492	3.21872	4.36664	3.65523	4.17121	4.83268	6.11426	4.49433	3.02124	5.78165	0	5.07332	4.69847	1.66878	0	5.59518	2.51974	1.63982	5.55576	0	0	3.87757	4.05448	2.65116	0	4.48757	4.78849	0	5.77251	4.81247	1.27053	2.41898	2.52114	3.5721	3.0007	1.7805	4.16935	2.11626
1	23583551	23603551	Breast_SE_65_14	3.96235	2.6492	3.54115	3.52961	3.64005	5.52593	3.9296	4.51951	3.43072	4.25946	6.1473	3.83253	1.34182	5.41591	3.95334	0	4.53675	1.0486	6.69413	5.12384	4.94101	3.78576	5.98871	3.09008	3.12155	5.25625	5.82273	2.85182	0	0	6.09012	5.86106	1.91516	6.84794	5.077	1.52897	3.51255	3.8894	3.67397	3.8069	3.04684	3.18332	3.73631
1	23999876	24019876	Breast_SE_67_4	3.95341	2.51317	3.7737	3.53355	4.81939	3.10367	1.67392	2.68938	3.12363	3.64119	0	5.42761	4.05988	3.66999	5.77955	0	4.72891	0	4.00039	2.99031	3.50752	1.44952	0	0.070425	0	0	5.28341	3.70539	2.91933	0	5.11195	5.38297	5.67644	4.14266	3.45546	3.91596	0.755182	4.59163	3.72077	2.71224	2.85075	2.88555	3.21512
1	24278440	24298440	Breast_SE_69_2	0	1.96907	1.42582	3.38653	4.04666	2.16588	2.92664	0	1.88942	3.05038	3.64068	5.70518	0	4.87253	3.75836	5.21797	5.49557	0.536741	5.9191	4.66039	3.8289	3.23946	5.80788	0	3.5402	6.32062	1.41956	2.07379	3.24926	0.7349	5.5798	4.48529	0	5.54547	5.53829	0	3.06008	5.30406	4.37444	4.59224	4.18053	3.12864	2.04406
1	24714959	24734959	Breast_SE_72_5	5.21596	3.49685	4.86658	4.8613	3.94713	4.43888	3.45434	5.46009	4.25293	3.46254	2.42459	0	4.28835	0.256212	4.10521	0	5.60255	2.801	0	3.85211	2.82848	3.62678	4.74119	5.49717	4.37526	0	2.19043	3.89752	6.65101	3.95597	5.19406	5.49926	2.83631	4.95486	3.88191	0	2.49332	4.04777	4.02809	3.32738	3.72824	3.13967	3.62388
1	24925007	24945007	Breast_SE_73_5	4.61678	4.89162	4.93641	5.52734	4.54942	5.82656	5.87143	4.07876	5.42401	4.39087	1.86921	0	0	0	0	4.18778	5.92343	5.22805	0	4.27279	3.00689	2.48731	0	0	0	0	0	5.6862	0	0	5.34821	2.63997	3.22888	4.94177	0	0	1.55088	0	0	0	0	1.75667	0.501649
1	25005007	25025007	Breast_SE_73_9	5.01442	5.03927	5.24991	5.72409	4.13064	5.61471	4.92243	3.63231	6.15642	5.24873	0	0.900038	0	0	0	0	6.5166	0	0	0	2.59261	1.73859	0	4.29159	0	0	0	6.33264	3.23288	4.0242	6.02581	3.04798	3.92459	6.44314	4.15991	0	0.709293	0	0	0	0	2.94236	0.437426
1	25548341	25568341	Breast_SE_76_5	3.44399	3.43046	3.6814	3.94685	3.91603	5.71323	4.8905	3.80052	3.89249	2.57378	0	0	0.392123	5.94106	1.52793	0	0	1.44457	3.35609	4.30869	1.59896	3.38341	5.23151	4.23563	0	0	0.178691	0.685351	2.20897	2.33028	5.3339	6.1019	2.04571	6.03552	4.05341	0	2.35759	5.15603	4.95295	4.15788	0	3.00846	1.94352
1	26007852	26027852	Breast_SE_79_2	4.54556	2.2186	4.45612	2.86266	0.553868	2.86582	0	0.208458	5.10836	0.895207	4.54163	0	3.20382	2.30192	3.06965	0	4.61195	0	0	3.18762	0	4.34877	1.88139	2.35172	0	0	1.67135	0	0	0	3.36553	2.99093	7.27487	5.23575	0	0	2.31703	4.0014	4.11684	3.51908	1.43876	2.97899	3.93601
1	26282078	26302078	Breast_SE_80_2	4.06692	4.95667	4.38688	4.84879	5.14195	6.48952	6.30017	4.88424	4.59562	4.6322	0.420956	0	2.64186	2.47544	4.651	3.36289	4.94269	0	0.897335	1.78185	0.0208124	2.96568	3.33026	4.99479	3.91678	0	0	3.00482	4.68066	3.59928	4.83864	3.07016	0	5.93589	5.41582	0	2.22853	0	0	3.55126	0.627497	3.51205	0
1	26941486	26961486	Breast_SE_84_1	1.4359	3.16088	0.859636	3.70148	4.44181	3.78267	4.17068	5.71044	2.49636	2.59779	4.65038	0	0	6.12476	0	4.8467	0	4.31848	0	5.08641	3.0324	2.74983	5.13667	0	4.71933	5.05231	4.88996	0	0.0317453	0	4.87809	4.8408	4.42214	4.48412	0.157435	3.49764	2.58937	5.29518	1.97083	4.1247	2.55847	0	3.46491
1	29106187	29126187	Breast_SE_93_1	4.3887	3.10968	4.48564	2.19654	4.24857	4.62363	4.33075	5.59536	3.4426	3.14321	5.43296	5.80891	4.25602	0	6.81147	0	6.3497	6.26905	0	0	3.89787	2.2461	2.94712	6.33525	5.07702	0	0.67628	4.11625	4.95811	6.12985	0	0	0	4.92188	3.7589	0	2.22675	0	0	2.18954	0	4.35187	0
1	29232107	29252107	Breast_SE_94_4	5.10747	1.4637	4.88699	6.43013	1.8411	3.15065	2.1329	3.7752	5.13122	2.64522	3.3676	0	0	0	2.92308	0	7.21936	5.35508	5.55199	4.31027	4.34643	3.63786	5.27932	0	1.5132	4.47401	5.51644	4.11272	0	0	5.3794	6.44396	6.67304	7.98362	5.11719	0	3.18293	4.37637	1.72306	3.12132	3.7518	3.16166	2.63979
1	29704657	29724657	Breast_SE_95_3	4.89392	2.57245	4.3654	1.37405	1.53917	3.41033	0.252632	3.11663	0	3.54531	0	0	0	0	0	0	6.58491	2.55828	2.90197	0	2.91509	3.159	5.45284	4.5939	4.55172	0.789604	0	3.59137	5.94895	2.28492	0	0	0	3.5377	6.09226	0	3.18287	0	3.4635	0	2.56188	2.67134	0
1	30771677	30791677	Breast_SE_96_5	2.11385	2.78957	3.44251	3.33142	0.4205	3.84838	3.00894	2.39129	3.34702	2.30632	0	0	0	0	0	0	3.36986	0	0	0	0	2.34911	1.94201	0	4.58068	6.38343	0	3.48248	2.6804	0	0	0	0	0	5.50962	0	1.44935	0	0	0	0	0	0.399498
1	31404821	31424821	Breast_SE_99_3	3.29116	2.88132	2.36815	3.36267	3.83044	4.7085	5.08977	5.06488	3.00232	4.23858	5.71499	0	0	6.00551	2.95385	5.15349	0.417449	5.33096	5.59005	6.1389	1.79986	4.5093	6.76041	0.0696188	5.95377	5.26102	3.92679	3.19313	4.22026	3.29815	5.25122	5.02549	2.2974	6.64037	4.25181	3.67845	3.9496	5.79353	3.98231	5.08052	4.63997	1.12425	4.00938
1	31561877	31581877	Breast_SE_101_2	4.57432	2.76131	4.1073	4.21407	5.77808	4.51219	4.18019	4.46233	3.96303	4.8292	6.40306	0	6.34393	3.42858	0	6.74476	5.46223	4.00788	6.69132	5.80815	5.72879	4.51946	6.30351	3.31543	3.49212	5.45815	2.59261	3.91643	4.72783	5.08198	5.87868	4.65384	4.68072	7.36342	5.28517	0	3.92401	0.946724	4.41383	4.2402	4.84238	2.94564	0
1	31685062	31705062	Breast_SE_102_5	5.92475	4.06634	5.3949	4.1479	5.08125	4.98288	4.33167	5.24391	3.47386	5.84114	4.03155	7.32832	5.98372	4.29965	0	6.28917	7.39515	3.27268	5.03002	2.90978	5.93502	4.74942	6.76511	6.8116	5.79784	4.87292	3.37189	5.5816	4.24337	6.91662	6.83875	4.38589	4.02029	6.74025	7.52566	0	3.62404	3.19784	4.03337	4.83209	4.48272	3.67295	1.34585
1	32691008	32711008	Breast_SE_107_2	2.45078	3.53908	3.11107	2.52234	2.84498	3.81189	1.27329	4.22269	2.52195	2.95706	1.03264	6.88747	3.29336	4.89974	3.03632	3.29091	2.2175	0	0.380699	4.51726	5.84368	2.88085	3.40274	6.82536	0	2.84433	0	5.18524	1.43774	2.91181	2.28484	2.94766	0	4.80076	0.886475	0	2.50502	4.79146	2.77711	3.16773	1.23589	3.32213	4.06258
1	33092245	33112245	Breast_SE_108_10	3.38516	0	3.23049	1.48382	1.36202	1.69362	0	2.55689	1.53049	0	0	5.95858	4.93892	0	0	0	5.68829	0	3.60462	4.28554	5.00949	1.43285	4.51852	3.28368	2.52767	0	0	4.59822	5.45527	0	2.44406	0	0	5.20496	4.60581	0	1.71761	3.1457	3.25128	0.746219	0	2.48661	0
1	33145042	33165042	Breast_SE_109_2	0.431758	0	0	0	2.58639	4.06547	0	5.48673	0	3.56563	5.11875	0	0	5.426	3.40407	0	1.43029	0	3.3834	5.22373	2.45715	1.4661	0	4.95974	0	0	4.29079	4.6819	0	0	5.08656	3.76677	0	0	0	2.61359	0.683031	5.50278	3.51323	3.54326	0	3.78449	3.70552
1	33214303	33234303	Breast_SE_110_1	0.381576	0	0	0.216567	1.48561	0	0	0	0.932659	2.88722	5.16528	0	0	0	0	0	0	0	5.74485	1.5064	3.41937	2.1768	4.71107	0	1.81302	3.95118	3.19668	0	0	0	4.67638	1.97595	0	6.00349	0	0	1.47049	2.59767	2.70451	2.23503	1.30298	1.84808	1.63475
1	34752915	34772915	Breast_SE_111_2	0	0	2.5983	4.97405	0	0	0	0	1.76136	0	0	0	4.22762	0	0	0	0	3.13171	4.97572	0	0.211905	4.21378	6.07667	0	4.67857	5.30051	0	0	0	0	4.22639	0	4.88265	6.29123	0	0	3.49473	0	2.98927	4.28955	2.69454	0	0
1	34772915	34792915	Breast_SE_111_3	2.48988	0	3.83858	5.45046	0	0	1.57587	2.45763	3.64844	0	4.84702	0	3.73628	0	3.74923	0	0	4.62318	4.21082	0	4.06896	4.1397	6.29473	0	5.44145	6.42313	2.99032	0	0	0	5.39524	0	5.63673	6.40164	0	0	3.78487	0	0	3.98571	1.28641	2.51935	0
1	36340028	36360028	Breast_SE_113_14	4.68362	3.10137	4.44531	4.87755	3.78974	4.2107	3.50354	3.40217	3.42831	5.1742	4.16037	2.7255	7.61944	0	3.15051	6.89213	6.36687	0	0	0.896174	5.19681	3.47319	5.35078	6.71492	5.62052	4.1582	0.154363	5.73152	7.08124	6.13455	3.26116	1.84037	0	5.54812	6.95408	0	2.82647	0.554675	0.270618	4.4472	5.02993	0	1.67999
1	39975213	39995213	Breast_SE_120_5	1.25637	0	2.02753	2.44024	0	4.34714	0	3.43025	0.127994	0	3.88662	0	0	5.19495	0	0	0	0	6.26845	5.42672	0	2.77702	3.83204	0	0	1.17022	0	0	0	0	3.94892	5.56489	2.63209	4.51361	0	1.8922	2.48664	4.42178	3.64188	3.68173	2.30465	0	3.43986
1	40095213	40115213	Breast_SE_120_11	1.48777	0.768862	1.30255	2.00878	0	1.35127	2.68257	1.32382	0.765026	2.20169	3.35007	0.85144	0	1.90446	0	0	0	0	4.94033	5.08073	4.20754	0	0	0	0	0	3.30086	0	0	0	4.89708	5.44318	1.17158	3.66326	0.827711	1.89345	0	5.36251	0.433398	2.57186	0.725385	0	6.20743
1	40300809	40320809	Breast_SE_121_1	2.41145	3.64952	2.42446	4.77794	4.38492	4.53798	4.65552	3.53152	3.98378	3.24742	2.95945	1.71616	2.80286	5.13194	4.31976	0.579046	0.855827	3.759	1.83442	4.81101	0	2.74285	0	1.95347	0	0	4.64215	3.66325	3.84374	0	6.3794	5.67227	0	0	0.559981	2.83723	1.41888	6.11441	0	4.65213	0	0	4.27846
1	40869592	40889592	Breast_SE_124_6	4.44757	2.21477	3.11636	3.84807	2.26383	2.08329	0	0	2.4648	4.69168	0	4.50267	2.72866	0	0	5.30647	5.05857	3.92084	3.95917	3.27611	2.83763	4.08382	6.37353	0.718798	4.8711	0	0.557813	1.6067	5.20375	0	5.89226	0.969951	4.34253	4.08632	5.26076	0	4.12148	2.8634	3.50198	3.47496	3.53669	0.925426	0.349666
1	40889592	40909592	Breast_SE_124_7	5.12479	0	4.7399	5.16383	3.95617	3.90294	2.43825	3.3293	4.22275	6.28084	5.25313	0	3.23571	1.37942	0	4.3117	4.53107	2.24259	6.59551	6.49882	4.70874	3.76215	5.32017	2.911	3.46045	0	5.64221	0.172448	3.62127	0	6.8304	4.85319	7.39305	6.11505	4.28463	4.10143	3.38332	5.62212	4.16605	4.405	4.34021	0	3.99186
1	40909592	40929592	Breast_SE_124_8	5.19574	3.32536	4.77793	5.25215	3.90494	3.86348	0	3.37548	4.73712	5.47966	2.25276	0	0	4.26811	0	0	0	0	3.40478	5.56468	0	2.34958	0	0	0	0	4.12624	0	0	0	6.38938	4.08575	7.52036	0	0.190514	4.04833	0.76421	5.9123	4.83574	3.61479	5.09239	1.79027	4.44767
1	41351840	41371840	Breast_SE_125_3	3.83909	2.4551	3.68925	5.24151	6.1459	4.89718	4.93364	3.77045	4.27332	5.69052	6.74779	0	0	6.92213	3.90408	6.19742	5.43978	3.4783	5.82028	6.35783	5.79952	2.18677	0	0	0	0	5.4772	3.33633	1.17338	5.32604	7.44163	6.31576	4.57658	4.03404	2.55096	4.0233	1.93318	5.95237	3.43315	5.4477	4.5669	4.51316	4.51927
1	41371840	41391840	Breast_SE_125_4	3.14438	0	2.19643	4.49287	3.64279	4.22676	3.63937	2.69492	2.54689	4.38316	4.11245	0	1.9793	4.34487	2.76029	1.48911	0	4.82437	1.83681	4.44962	5.8509	1.68247	0	3.58863	0	0	3.02979	4.52756	3.66591	5.13346	6.45453	4.75762	0.487394	5.38592	0	1.1551	0	3.63924	3.15853	4.08753	2.37524	3.94497	3.07832
1	41411840	41431840	Breast_SE_125_6	3.37012	1.45038	3.26773	2.21203	4.35094	4.59054	4.20708	4.4251	0	4.90951	6.18554	0	3.21507	5.78745	0	3.48611	3.80524	0	5.00559	5.39191	4.51211	3.15371	3.48545	1.42686	0.0261529	2.82646	3.85764	2.93753	0	0	5.9734	5.56269	0	2.26301	3.59973	3.06146	2.5082	5.7553	2.33502	4.80969	2.82638	2.71259	1.97085
1	41431840	41451840	Breast_SE_125_7	3.63499	0	2.63171	1.77822	4.3874	5.31916	4.64737	5.57829	0	5.07095	6.2946	0	0	6.63661	0	3.98867	4.57849	0	7.55658	6.45755	4.9757	2.71542	1.55416	6.28267	0	0	3.61003	5.55574	0	0	5.78303	7.20016	2.16076	4.0845	4.03985	3.60359	0.513811	6.56317	3.12196	4.38268	3.72518	2.32077	4.11061
1	41451840	41471840	Breast_SE_125_8	2.78924	0	0.401316	0	2.3158	3.01442	2.50481	4.14807	0	3.16606	3.07353	0	0	6.08943	0	0	4.13165	0	3.39178	5.37245	2.45057	3.26369	2.62614	1.93054	0	1.28368	0	3.63519	0	0	5.2544	5.00979	0	0	0	0	2.47678	4.8123	2.03898	2.25001	2.43248	2.094	1.08961
1	41471840	41491840	Breast_SE_125_9	3.73347	4.36081	3.6557	3.82398	4.8581	4.6731	4.62749	4.59124	2.77368	5.20281	5.24926	0	4.08775	6.88817	5.38863	6.27655	4.98647	0	6.57291	6.43213	5.56547	3.14342	3.43146	4.85887	0	5.31503	2.88478	4.86168	2.98898	1.27876	5.67734	6.12507	4.19959	1.53639	5.36879	0.112949	2.05149	4.71189	2.60537	4.76164	3.78587	4.02352	2.99883
1	41854884	41874884	Breast_SE_127_4	2.47047	1.55327	0	2.08842	2.5224	2.78463	0	3.60797	0	1.55478	0	0	3.55185	4.72347	2.84458	4.062	4.80878	0	6.35834	1.35498	3.32405	2.96615	0.139082	2.60159	0	0	5.54046	0.81713	2.59179	0	0	6.26841	0	5.10419	4.51616	4.8557	2.80722	5.57983	3.51924	4.33255	3.77141	2.26633	1.5043
1	43548450	43568450	Breast_SE_133_8	5.03476	6.01518	6.19738	5.55498	4.93224	4.82094	5.49654	5.6442	4.93302	6.99876	5.56339	0	3.33486	6.38221	4.45266	7.70704	0	3.29826	5.22137	6.18334	5.84323	3.8023	4.40757	0	0	3.81934	6.08652	2.35205	0	4.03827	6.4935	5.94577	5.54195	6.24016	2.54196	3.52999	2.27265	6.09395	3.10877	4.79262	4.46994	3.4034	3.41083
1	43830593	43850593	Breast_SE_134_2	4.96824	2.23109	4.64927	4.98611	4.59138	1.111	0.896183	2.02224	4.82218	4.55902	0	4.67637	0	0	0	0	5.26184	0	6.95956	0	5.4931	2.01524	3.94025	3.19674	0	0	0.996267	4.43932	5.07322	1.98992	6.08421	3.33609	6.13753	5.87914	3.47436	2.80056	1.89647	2.51577	2.55248	2.65592	2.56809	2.33239	0.111289
1	43850593	43870593	Breast_SE_134_3	2.60862	0	1.74272	1.31529	2.5363	0.255283	0	0	2.2273	4.7792	0	2.96878	0	0	0	0	5.11777	0	5.56252	0	3.07343	2.42025	2.4521	0	0	0	2.40807	3.83415	1.37002	0	5.90997	4.65275	5.34539	4.5825	2.18342	1.9722	2.00291	3.24135	3.03589	3.61783	3.07963	2.96253	0.536621
1	46151839	46171839	Breast_SE_142_1	3.60525	1.08083	2.68492	3.72947	3.21668	3.22836	2.6084	4.2686	3.14572	5.22289	3.82602	0	0	4.32706	0	6.21013	2.20547	0	3.6337	4.43766	2.42334	0	0	0	0	0	4.0504	0	0	0	4.72303	3.77389	1.01001	3.82436	0	0	0	4.66894	3.18782	4.62688	3.48863	2.52096	2.71988
1	46738584	46758584	Breast_SE_144_1	0	0	0.87835	2.73416	0	1.7363	1.42092	2.16223	0	4.25792	5.28831	0	0	4.12892	3.81731	4.79707	0	0	7.39775	5.33968	2.69164	0	2.04303	0	0	3.94275	4.84799	0	0	0	5.47741	5.95331	0.860161	4.38573	0	3.87413	0.726914	5.47685	2.82156	4.27849	4.07872	1.69356	4.21916
1	46799284	46819284	Breast_SE_145_2	0	0	0.295321	1.45132	0	0	0	1.80566	0	0	5.9255	0	0	4.40056	0	6.43491	0	0	6.86688	4.61454	0.143735	0	0	0	0	0	3.10141	0	0	0	6.05395	4.13722	0	0	0	0	0	3.58526	2.48454	3.72383	3.25328	3.23344	3.3631
1	47176472	47196472	Breast_SE_146_1	5.00361	1.75634	4.05483	6.66352	3.53762	2.83409	5.0922	5.03274	4.84175	6.66718	3.40102	0	0	4.39872	6.05627	6.20216	2.98942	0	3.14532	5.01094	1.77039	2.2939	0	0.72648	0	5.78403	0	0.853951	2.62393	6.18535	7.01805	2.46576	3.7588	5.41561	5.06653	0	1.40793	0	3.00895	5.01531	4.87617	3.01055	0
1	50970671	50990671	Breast_SE_152_2	4.36829	5.67531	4.19115	4.07129	3.61261	3.93505	3.40191	3.8995	3.89333	4.56135	2.83141	6.97737	4.73503	2.39792	5.04989	0	5.97732	1.66418	0	2.21004	5.80941	0	0	5.90282	4.55606	3.79827	0	5.22229	5.24065	5.67774	1.18343	0	6.61733	0.483223	5.43651	0	0	0	1.71477	0.203922	0.657165	2.97414	0
1	51310716	51330716	Breast_SE_153_4	3.34673	5.39432	4.20905	3.25043	5.69915	4.07182	3.82886	5.84961	4.11485	6.3137	4.83841	0	0	6.30813	0	0	1.85436	0	6.58802	6.09018	3.66166	1.75236	0	0	0	0	5.99503	0	3.2659	1.83147	6.25547	5.63357	3.1029	4.17882	3.81783	5.22223	0	6.54591	0.735308	5.79502	3.10867	3.0156	3.93588
1	51551749	51571749	Breast_SE_154_2	1.37464	0.987306	0.970931	0	3.63729	3.64096	1.87066	3.61416	1.95195	5.17129	5.62147	4.61977	5.56381	1.28706	2.17179	0	4.6418	0	7.10288	4.31066	5.00714	0.570702	2.24203	0.620986	0	0	6.23469	0	5.24657	3.47601	5.57888	4.8223	4.20554	6.34896	1.2925	3.92696	2.8863	5.17733	2.36105	3.02291	2.19014	1.42359	0.712818
1	53301821	53321821	Breast_SE_160_3	2.15997	3.06114	1.12434	1.11289	3.25294	3.4247	2.77903	0	0	5.64449	2.87708	0.165039	0	3.04345	3.69676	7.96622	3.01113	0	0	4.20486	2.58262	2.86811	0	0	0	0	1.1637	0.77219	0	2.82503	5.10726	3.40432	3.43142	0	3.76288	0	0.204326	1.82195	1.69568	0	2.59696	0	2.12205
1	53723802	53743802	Breast_SE_162_1	0	2.34928	3.43343	0	0	2.03233	0	1.97367	0	0	0	5.95396	0	0	0	0	3.50957	0	0	0	0	0	0	6.70672	5.15215	0	0	4.86948	0	0	0	0	0	0	5.36359	0	0	0	0	0	1.04591	3.02477	0
1	55701486	55721486	Breast_SE_168_2	2.0442	3.34695	1.78185	0	0	0	0	2.73878	0	0	3.12181	6.01549	4.40952	0	0	0	0	0	6.12501	0	3.62181	0	0	4.51484	0	0	0	0.538749	3.38226	0	2.84639	0	0	4.17272	3.52385	0	0	0	3.11966	0.8526	2.82823	3.11866	0
1	58565473	58585473	Breast_SE_173_1	5.8715	2.49768	4.21281	5.99557	2.21842	4.63249	5.30777	6.01577	5.48952	6.2868	5.53026	1.74163	3.36834	0	0	4.62294	2.5039	5.13694	7.12448	6.47382	4.73103	3.7758	5.72471	0	4.85347	5.97206	6.06998	0	6.47258	1.82326	6.53278	5.2876	7.71005	5.69574	3.2052	4.27854	3.89927	5.59479	3.79074	4.92297	4.82013	1.6986	3.76243
1	58750485	58770485	Breast_SE_174_5	3.60729	1.61498	2.89722	1.42711	2.45416	0	0	1.8876	1.14234	1.40212	0	5.20312	3.94064	0	0	0	4.54134	0	3.93975	0	2.4911	2.85588	4.6043	5.16342	2.15362	3.16761	0	3.2577	5.87046	1.00729	0.795841	0	0	2.27448	4.75384	0	3.36173	0	2.02762	1.69621	1.29795	1.83246	0
1	59136718	59156718	Breast_SE_176_3	3.71549	2.96972	3.71776	3.15054	2.24383	3.10984	0.767139	3.06125	2.92622	2.14798	2.36018	6.23328	5.3282	0	5.39876	0	4.34507	1.37726	1.96659	0	3.79639	1.8713	3.78043	4.99231	2.50893	2.40684	0	3.53675	6.06868	5.25076	2.30997	0	0	2.98698	5.10876	0	2.44349	0	3.60467	3.74648	3.30782	3.60604	0
1	62306869	62326869	Breast_SE_181_3	2.99677	4.93965	4.95184	4.34679	4.63032	1.84361	0	2.7421	5.39814	3.98737	4.12404	0	0.280319	0	2.15437	3.64167	2.64068	0	5.13336	0	3.46319	3.71383	4.30037	2.25267	0	3.72571	0	3.2411	0	0	1.61319	0	7.15202	4.89022	0	0	3.28106	0	4.27365	0	1.88236	1.09825	0
1	63660104	63680104	Breast_SE_183_2	4.95618	1.93192	4.3267	2.97641	2.93967	2.07484	0	1.72801	2.30672	5.50606	4.04964	4.72192	5.28788	0	4.13059	7.23487	4.07505	0	5.60063	4.31124	2.53583	3.36125	4.92693	4.96211	2.28108	3.47471	0	2.65464	5.35369	0	5.56016	0	5.18611	5.20394	4.14023	0	3.19937	0	4.54722	0.526215	4.35744	3.15727	0
1	66266373	66286373	Breast_SE_188_3	5.31873	4.3033	3.28629	5.49902	2.83597	4.10068	2.68391	1.65767	4.067	5.4375	0	5.02022	3.87034	0	2.30921	0	3.38893	0	5.94902	4.12967	3.29891	0.371184	0	0	0	3.3368	1.61615	3.82466	2.41863	3.62815	2.36525	0	7.14732	6.58358	2.64061	0	0.388589	0	2.67048	0.421411	3.31764	2.15243	2.70507
1	72271654	72291654	Breast_SE_194_1	3.73461	4.13303	3.20953	0	2.88573	2.40041	1.45514	3.47285	3.94444	4.10401	0	4.06918	5.66886	0	0	0	0	0.942552	0	2.73045	3.7191	1.73989	4.15403	5.64501	3.98585	1.77509	0	1.77873	4.49852	5.11864	0	2.17458	6.67032	5.57254	4.40579	0	1.89372	0	2.48817	1.29493	2.50257	2.44724	0.361368
1	76855634	76875634	Breast_SE_196_1	3.86019	3.46632	3.41916	5.68058	0	0	3.931	0	4.46537	6.71188	0	0	6.03297	0	0	4.44605	0	0	0	0	5.44261	0	0	4.30217	0	0	0	0	0	0	4.79528	0	5.83642	0	0	0	0	0	1.99728	0	2.57761	0.78252	0
1	76985142	77005142	Breast_SE_197_1	3.93328	3.82503	2.93426	5.18582	0	0	0	0	4.5665	6.4622	0	4.01104	3.63734	0	0	0	0	0	5.36447	0	4.13776	0.825004	2.53299	2.89702	0	0	0	0	2.32801	0	5.3693	0	7.48473	5.43227	0	0	1.44661	0	0	0.0567505	2.2312	0	0
1	77528019	77548019	Breast_SE_198_3	1.40351	1.57901	1.72704	0	0	0	0	0	0	2.20009	2.72744	6.69907	5.95386	1.05319	0.171415	0	4.77568	0	3.67432	1.98099	6.21003	2.56802	3.75457	5.94014	3.17447	0	0	3.71938	5.23273	3.95215	4.81568	0	0	5.11289	5.10376	0	2.79981	1.0487	2.89927	3.77326	0.24633	1.82531	0.26424
1	77874766	77894766	Breast_SE_200_2	2.85155	2.87705	2.91855	0.513722	2.15271	0	0.3688	2.73848	0.0146722	0	0	3.84278	5.9593	0	4.65399	0	4.45532	0	0	0	4.53589	2.82346	4.20031	5.81863	4.72148	1.08609	0	4.44416	5.10057	4.84186	0	0	0	3.47793	4.33031	0	2.55756	0	2.04891	0	0	1.06036	0
1	81783444	81803444	Breast_SE_204_1	4.16295	4.54532	2.92686	4.74045	5.24772	4.09524	3.57988	4.09992	4.35523	6.26913	0	5.97204	4.92574	5.58573	6.70984	6.35366	4.0572	0	0	4.94981	4.12326	2.72288	5.19113	5.63033	0	4.60575	2.08521	5.90288	3.97437	4.38395	4.6893	1.42217	3.41958	4.58222	5.28236	0.722641	2.93221	2.30891	2.76289	2.18758	1.93588	2.915	0.490629
1	85316782	85336782	Breast_SE_206_4	3.52506	0.302188	2.74272	0	0.566794	1.195	0	1.71246	1.57836	1.06028	0	5.01649	4.91055	0	1.98661	0	4.82633	0	1.0762	0	6.009	1.56388	1.38045	5.79968	2.52064	0	0	2.44354	6.6192	0.651072	2.65082	0	0	0	0	0	1.3811	0	2.31328	1.82228	1.75728	2.68557	0
1	85593890	85613890	Breast_SE_208_5	3.19874	0	1.41896	2.43129	0	0.901881	0	3.97251	1.13964	4.7781	3.32538	6.03615	5.39215	0	4.37802	0	3.87629	0	5.00745	5.16493	7.55105	0.902403	3.31143	5.47766	0	0	0	4.42787	6.42044	0.196773	4.78692	1.6922	3.53639	4.82861	4.17789	1.49122	2.37667	5.03806	2.09445	4.23769	3.78673	3.03481	2.14523
1	85613890	85633890	Breast_SE_208_6	1.09701	0	0	0	0	0	0	3.16993	0	1.72621	0	4.23107	2.61592	0.620195	0.777134	0	4.35819	0	1.12355	3.09868	5.27361	0	0	4.7096	0	0	0	4.14113	6.08692	0	4.54297	3.55766	0	0	1.95963	0	0	3.92211	2.24213	3.79674	2.37215	1.37452	0
1	93570646	93590646	Breast_SE_222_2	4.37721	5.32029	4.47936	4.7554	4.92755	4.74118	3.87665	5.05581	3.93564	6.27921	5.80315	3.97971	3.27168	5.54803	2.59494	2.99607	3.96606	0	5.87554	6.46292	6.06501	3.38338	4.61342	1.56273	0	0	3.78504	3.3306	3.33134	0	5.44942	6.52481	5.66786	5.53165	1.88721	4.03723	1.75484	6.11537	4.6188	4.41128	4.57609	3.93498	4.63933
1	93690646	93710646	Breast_SE_222_8	4.7363	3.42485	5.46638	5.72323	2.29103	3.8801	1.95567	3.95092	4.11677	4.09718	5.1131	7.18573	7.09144	0	2.52191	0	6.72177	0	6.35608	5.77136	6.86647	4.28883	6.36474	6.41121	5.41999	5.14285	1.17593	4.30588	7.18812	0	5.41062	4.04474	4.77526	6.86342	6.12293	0	3.96942	1.90157	3.95334	4.59892	4.07999	3.30425	0
1	93730646	93750646	Breast_SE_222_10	3.11058	3.63108	4.55927	5.2453	0	0.873445	0	0	2.00886	0	0	5.4123	5.07046	0	0	0	3.60416	0	0.860062	0	5.14736	3.03526	4.00824	5.11585	1.1822	0	0	0.369396	5.34283	0	1.9276	3.03808	4.59759	5.85283	3.32646	0	2.97803	0	3.64307	1.71677	1.92879	3.02983	0
1	93750646	93770646	Breast_SE_222_11	0	0	1.97108	2.93498	0	2.04529	0	0	0.23955	0	0	3.04119	2.25582	0	0	0	5.81255	0	1.0814	0.511472	5.50253	2.38543	3.72999	0	2.22805	0	0	0	5.44118	1.81507	0.0396738	3.34674	0	7.08255	4.87691	0	2.11328	0	4.11824	3.17618	1.81359	3.7566	0
1	93770646	93790646	Breast_SE_222_12	2.24035	1.89966	1.35425	2.91418	0	0	0	0	0	0	1.2881	4.27102	3.54089	0	0	0	4.86911	0	5.57033	3.70477	5.39307	2.54432	5.37604	0	3.29141	3.09918	1.11435	0	5.50227	0	3.33561	5.5858	3.97207	6.62347	3.36167	0	3.71996	3.26345	2.39869	3.28748	2.8213	1.91884	0
1	93976331	93996331	Breast_SE_223_2	3.94004	0.979972	3.91424	3.84639	2.08872	0.349238	0	0	0.78682	5.29639	4.78839	0	0	0	0	0.694276	6.2758	0	5.51327	3.65844	5.5468	4.31919	5.78907	3.00361	0	0	0	0	0	0	4.63299	2.15795	4.49984	5.93798	0.681524	0	3.89821	0	4.71217	1.55643	3.86049	3.28202	0
1	94056331	94076331	Breast_SE_223_6	2.62646	0	3.17245	0	2.79842	3.88468	1.44981	2.6261	2.13457	3.09743	3.62336	0	0	0	5.19984	1.83192	0	0	5.79882	4.34176	1.54401	0	0	2.58876	0	0	1.17995	2.18068	4.81607	0	4.53588	5.28712	5.43955	0	0	0	0.0208323	3.84695	3.56656	5.09175	3.38103	2.81803	0
1	94076331	94096331	Breast_SE_223_7	1.69036	0.642988	3.11985	3.60073	4.07995	3.32733	2.47442	0	2.7286	4.03132	0	0	0	0	4.47349	5.88329	0	0	5.05603	2.41381	0	0	0	1.48466	0	0	0	0	0	0	5.45465	0.94196	7.02992	0	0	0	0	0	4.13164	3.13531	3.48923	3.84581	0
1	94096331	94116331	Breast_SE_223_8	0	0	2.74388	4.67555	4.50402	3.23175	3.47919	0	3.92267	6.30143	5.66381	0	0	0	5.24696	6.8945	0	0	6.22517	0	3.06425	2.47093	2.53087	0	0	0	3.84886	0	0	0	7.09047	3.0636	7.08944	0	0	0	1.0632	2.01059	4.30128	3.00199	3.74231	3.80677	0
1	94116331	94136331	Breast_SE_223_9	0	0	1.34808	0	1.30875	1.94164	1.88222	0	0	3.52893	4.5603	0	0	0	5.80476	4.16079	0	0	4.88836	0	0	0	0	0	0	0	1.71082	0	0	0	4.89891	4.5525	4.61686	0	0	2.68698	0	3.55493	3.1028	3.04357	2.09713	3.19949	0.216438
1	94322758	94342758	Breast_SE_224_9	2.86155	2.54363	2.36867	2.98914	1.23245	2.92091	0	0	2.3669	3.88592	3.96847	5.43717	4.46856	2.66681	3.65331	0	4.91469	0	6.16058	4.74127	5.93874	3.18488	4.06307	5.05955	0	0	0.847768	3.58572	6.30239	0.905362	4.24388	5.30033	4.85551	5.76185	0	0	3.42976	4.77053	3.82268	2.9161	2.9656	2.42614	0
1	94604704	94624704	Breast_SE_225_6	0.350775	0	0	0	0	0	0	0	0	0	0.680752	0	6.12982	0	5.51114	0	2.7138	2.1729	7.31693	4.25411	6.74991	3.8286	5.82677	4.97844	4.13176	3.10271	0	2.53977	6.59705	0	4.54857	3.92328	0	6.92568	4.6947	0	3.75297	5.20341	3.48836	3.68529	2.38446	2.11697	2.31537
1	94644704	94664704	Breast_SE_225_8	1.20065	0	2.66149	0	0	0	0	1.92072	0	0.781093	2.63583	0	5.41889	0	4.0544	0	3.05837	2.38164	6.45102	2.02208	6.28761	3.56599	5.14007	5.68627	3.56802	1.43392	0	2.11239	6.07931	0	3.96379	0	0	6.2196	4.6511	0	3.9844	1.67579	2.75417	1.0119	1.08342	1.65799	0
1	94724704	94744704	Breast_SE_225_12	3.89505	0.406194	3.42479	3.14017	0.347942	3.46702	0	4.62054	0.779892	1.61118	0	0	4.11887	0	0	0	4.58026	0	6.22814	1.44508	4.17329	3.73473	4.95169	4.51379	2.52648	0	0	4.30811	5.24003	0	4.2321	0.431953	0.497015	6.55651	3.67051	0	4.08801	3.12482	2.83198	2.71295	2.92863	3.08453	1.39194
1	94851697	94871697	Breast_SE_226_3	5.17473	4.48997	4.72112	4.36026	3.56907	3.00245	1.47202	4.97627	4.34855	5.99416	4.85	5.74026	3.35689	0	0	0	4.59454	0	6.46192	4.72716	5.54886	2.27584	3.83352	3.86258	0	1.58926	0	1.9679	3.41447	0	5.41722	2.58371	6.02907	5.53098	2.40992	1.88377	2.72754	5.01437	4.00189	3.69677	3.75904	3.59264	1.57491
1	98034595	98054595	Breast_SE_229_3	0	0	0	0	0	0	1.70183	0	0	0.689972	0	6.26097	6.79217	0	5.2281	0	3.93098	3.73146	0	0	4.96724	2.14676	3.43075	4.27889	0	0	0	5.07421	4.22302	2.50956	0	0	0	0.772759	3.15066	0	3.11975	0	0	0.351174	0	0.55807	0
1	98310859	98330859	Breast_SE_231_5	0.392168	0	0.217403	0	0	0	0	0	0	0	0.549285	5.90264	2.78277	0	4.27416	0	3.39388	0	5.85482	0	4.16798	3.28314	4.67883	3.795	0	3.32882	0	3.7991	5.65467	0.562963	3.06554	0	0	5.07324	4.05432	0	4.23913	0	0.778051	0	1.38416	1.52065	0
1	107668222	107688222	Breast_SE_238_5	2.15439	2.28316	0	0	5.61787	3.27859	2.27292	1.55836	0	1.52923	0	3.59776	0	2.55899	1.79217	0	0	0	6.04819	6.02291	4.39308	3.11248	3.06602	0	0	4.12218	3.20457	0.843212	0	0	4.02164	4.02262	2.31909	3.55284	0	5.73942	3.57052	4.05574	0.496677	2.00274	1.46786	0	3.94044
1	109134494	109154494	Breast_SE_244_6	0.850368	0	0.181961	2.22436	3.87731	4.12088	3.14333	4.96462	0	3.84244	0	0	0	4.75052	0	1.69762	0	0	3.12477	4.91295	0	0	0	0	0	0	4.34052	0	0	0	3.58472	5.70468	0	0	0	4.88222	0	5.85939	1.88228	5.21809	4.28813	0.996493	4.74174
1	109234494	109254494	Breast_SE_244_11	4.46557	3.26664	4.78027	5.62097	4.89089	3.20753	3.74564	2.83315	4.97775	5.54047	0	0	0	4.63179	3.96267	4.45625	0	2.99459	4.45618	4.39621	2.14915	4.03389	4.68379	1.92037	1.49648	4.87998	7.47484	3.35924	0	0	5.75648	2.351	6.13979	5.80853	2.93746	1.69943	2.6349	5.083	3.71424	5.09528	2.68974	3.72981	2.25146
1	109715526	109735526	Breast_SE_246_3	0	0	0	0	3.33341	2.58848	1.31582	5.24276	0	0	6.59582	0	0	3.89877	3.9259	0	0	0	6.92192	6.16667	1.0096	0	0	0.503812	0	0	3.71269	0	0	0	0	5.78573	0	0	0	5.21569	0	5.64832	3.13795	3.45999	1.01726	2.52251	4.06983
1	109775526	109795526	Breast_SE_246_6	4.66026	3.65424	3.58914	3.81238	3.31089	4.46821	4.17228	3.34645	3.15958	4.97652	6.36152	4.65729	2.39364	1.8061	6.36083	4.65655	4.71474	1.72052	5.49134	5.28566	7.54731	3.35665	0	5.24283	0	0	2.2121	5.37731	5.26689	0.722149	6.01696	4.55369	3.79187	5.48504	5.24021	0	2.17431	3.27779	4.52855	4.19129	4.11647	3.81251	1.95947
1	109815526	109835526	Breast_SE_246_8	5.1943	3.36281	2.96548	3.93539	0	3.34139	2.14207	2.42952	2.00525	4.27641	4.27546	5.22074	5.221	0	4.00769	3.40394	5.25403	0	2.44867	5.15325	5.67145	1.93318	2.6445	6.26566	0	0	0	4.83714	6.46601	3.1661	4.95953	2.92451	5.51645	2.40942	6.33204	0	2.03827	0	3.42535	4.25523	3.93914	3.58505	0
1	109875526	109895526	Breast_SE_246_11	4.39498	3.51787	3.17956	5.00106	3.08317	3.85351	3.38875	3.27252	1.89144	4.79195	0	4.02818	2.84631	0	5.24498	5.47699	4.33864	0	2.81468	0	5.52994	2.06001	3.01623	4.92922	0	2.15595	0	5.07882	5.26705	3.44556	4.12772	4.57441	4.01557	5.24841	4.85994	0	0	0	4.91389	4.72858	3.80101	4.36885	0.111438
1	109895526	109915526	Breast_SE_246_12	5.30873	4.96175	3.92645	5.22691	3.85615	5.33061	5.54189	4.3622	3.44266	4.58921	0	4.50689	4.23626	0	5.00251	5.07084	5.54328	2.84389	2.26085	0.985837	6.0504	2.88109	3.76926	5.13689	2.08592	2.83004	0	4.90623	5.83433	5.14586	4.623	1.907	4.75529	3.14007	5.75662	0	2.38431	0	4.50829	4.60457	3.70602	4.31152	0
1	109915526	109935526	Breast_SE_246_13	5.58512	3.56087	3.56617	1.4063	2.31749	3.86159	3.24204	3.78118	2.19285	3.88536	0	3.72298	2.7242	0	5.08779	3.5352	5.67672	0	6.57323	1.65621	6.39459	3.89515	4.5825	4.9442	3.56695	2.24668	0	5.57323	4.79556	0	4.10101	3.96125	0	4.19519	5.6902	0	2.66292	0.975454	4.33534	2.91734	1.87764	4.55592	0.791502
1	110205481	110225481	Breast_SE_247_4	3.7349	2.26142	3.56351	5.2673	2.73647	4.65696	4.24524	2.40199	3.19513	4.91809	1.50895	0	0	4.36412	5.06676	5.83945	0.666588	3.83033	0	2.50622	0	3.10638	0	0	0	0	0	2.77763	0.0168368	1.88221	6.03181	1.47589	3.58209	4.74964	0	0	2.65283	0	3.60229	4.57894	4.57092	2.79571	0.402329
1	110225481	110245481	Breast_SE_247_5	4.72002	0	4.10692	4.65304	2.14943	4.3522	3.00089	0	3.17643	6.45936	5.14919	0	0	5.52134	4.33651	6.22435	0	0	3.30971	3.82485	1.9633	3.71015	3.91176	0	0	0	0	0	0	0	6.57915	3.27945	3.26115	6.68579	2.83633	0	2.3993	0	3.9009	5.13202	4.83035	2.55151	1.79069
1	111195849	111215849	Breast_SE_249_2	5.6166	5.21714	5.67843	6.33656	5.10522	6.21451	5.89797	5.20034	5.61667	6.26279	4.1873	0	0	4.06371	0.0233681	4.7783	0	3.55077	3.69181	5.32434	4.5701	2.70819	4.71693	0	0	0.578817	5.06411	0	0.536384	0	6.20738	6.05923	1.66108	0	0	3.68679	2.97173	6.50393	3.32642	4.34314	4.00592	1.87486	4.38494
1	113185483	113205483	Breast_SE_255_1	2.53182	0	2.83073	4.21087	3.4905	1.33323	0.0596891	5.58336	2.20184	4.35675	3.62186	0	0	5.15191	0	0	0	0	6.00494	5.24809	0	0	0	0	0	0	0	0	1.8355	0	5.78034	3.27788	2.76028	0	0	0.557275	0	4.7907	0	2.58992	0.977536	0	4.98072
1	115100257	115120257	Breast_SE_266_3	4.28644	0	4.09416	3.32855	1.75425	0.834103	0	1.62186	1.25935	2.56516	6.71572	0	0	0	0	4.35592	0	0	5.4281	3.51277	3.37506	0	0	2.24037	0	0	0	0	0	0	4.80719	0	0.840614	5.0898	0	0	0.403773	2.08059	2.54891	0	2.24893	0.887063	0
1	115325875	115345875	Breast_SE_267_4	0	0	2.14548	0	2.90017	0	0	0	1.05565	0	0	4.94453	3.74272	0	0	4.26379	5.16368	0	0	0	1.47125	0	0	5.78712	0	0	0	5.04702	5.68041	1.0448	0	0	0	0	4.91418	0	0.546166	0	3.59808	0	2.72017	3.29696	0
1	115654842	115674842	Breast_SE_269_1	3.3343	0	2.90441	1.73466	4.41881	0.959387	0	3.36478	3.17618	3.44431	3.68375	4.69763	0	5.45462	0	6.73533	3.48008	0	5.38849	4.96608	4.51126	0	0	0.194907	0	0	4.05585	4.28521	4.4309	0	3.87617	2.05005	0	5.60366	4.2791	0	0	4.78081	2.85284	3.11401	3.21795	2.78302	0.466145
1	116301213	116321213	Breast_SE_272_1	3.62339	2.5196	2.1821	3.476	1.29545	1.15582	0	3.35137	1.54957	4.27616	6.21066	0	0	3.31061	0	0	0	0	6.04047	4.55326	4.0508	0	0	0	0	0	4.16421	0	0	0	4.88075	4.41347	4.73107	4.04986	0	0.281366	0	4.78944	2.19183	3.6173	2.87177	0.855981	4.84317
1	116304484	116324484	Breast_SE_273_1	3.59951	2.51438	2.17718	3.54728	1.20747	1.55478	0	3.65484	1.14117	4.24543	6.21583	0	0	3.37619	0	0	0	0	6.04312	4.61024	4.08945	0	0	0	0	0	4.19231	0	0	0	4.87623	4.47108	4.73795	4.08398	0	0	0	4.86639	2.2063	3.71813	3.16991	0.824165	4.91962
1	117205176	117225176	Breast_SE_277_4	5.22134	2.36387	3.70494	5.7892	2.272	4.16188	2.45389	2.04991	4.87487	5.23211	4.69822	0	0	3.94886	0	5.33674	0	0	4.56047	5.37953	2.91474	0.43798	0	0	0	0	1.98536	0	0	0	5.86632	1.84082	6.91971	2.13164	0	0.146522	0	4.38813	2.97364	5.3168	4.29245	0	4.5906
1	117225176	117245176	Breast_SE_277_5	3.76548	2.05724	1.47195	4.2212	0	0.966455	0	0	1.8159	3.0886	0	0	0	3.54865	2.8072	0	0	0	5.53217	4.2141	0	0	0	0	0	0	0	0	0	0	5.02122	0	7.24529	0	0	0	0	1.37464	2.28475	2.45729	1.04915	1.25364	2.35644
1	117265176	117285176	Breast_SE_277_7	3.0074	0	1.7773	5.13752	4.10081	3.03162	0	1.49006	3.43145	4.62467	5.07961	0	0	3.61807	0.109514	0	0	0	6.38786	4.41906	4.46108	0	0	0	0	0	4.44141	0	0	0	5.24049	2.84179	6.49599	2.91708	0	3.34981	0	4.11014	2.10407	3.19825	3.42011	0.882836	4.41229
1	147741896	147761896	Breast_SE_290_1	4.83995	4.90756	2.18727	4.97862	4.88677	2.7421	0	0	1.46303	5.81013	5.31499	0	0	0	0	2.94782	0	0	5.52119	4.87226	3.42755	2.93039	4.51213	0	0	0	0	0	0	0	4.6813	0	5.08409	4.49022	0	0	2.29664	0	4.3059	0	4.0277	3.02389	0
1	150977601	150997601	Breast_SE_298_3	2.73516	1.23872	1.78067	3.98847	0.768197	4.72838	3.76942	1.80211	3.4319	2.93861	5.33701	0	3.85342	3.21679	2.53111	2.76493	2.71188	0	2.52906	4.06239	4.38803	2.07059	2.58225	0	0	0	6.75134	1.97058	4.39628	0	4.1697	6.41405	0	4.15981	4.04955	4.99013	0.683568	7.48321	2.32153	3.10609	1.77959	1.03585	4.43658
1	151361199	151381199	Breast_SE_301_7	1.26535	0	0.748389	1.68996	4.94823	3.64253	4.29993	3.29184	1.4642	0.260841	2.18833	0	0	6.23731	2.53238	0	3.55579	0	0.265642	5.45131	2.99861	0	0	0	0	0	2.94612	0	0	0	2.87199	4.68036	4.44852	0	0	0	0	4.26768	0.353759	3.75177	3.39126	3.3189	5.11662
1	151508978	151528978	Breast_SE_303_2	5.6896	3.69542	5.11934	5.77543	6.72821	5.2298	4.95782	5.24426	5.29741	6.11808	6.16414	0	3.74906	5.57488	2.78694	5.59563	0	0	5.75716	5.44477	5.81382	1.71089	2.64344	0	0	0	6.75807	0.871777	0	0	5.51277	6.80367	6.43547	5.34794	0	4.98012	0.802654	5.17254	2.11485	5.12789	5.00569	0	4.68655
1	151811760	151831760	Breast_SE_305_4	2.11235	2.9826	3.65747	4.12788	5.23679	4.49888	5.04686	4.76119	4.88362	4.36316	5.17601	0	0	6.66271	0	3.00096	0	0	4.71144	4.33467	2.00504	1.26955	0	0	0	0	0	0	0	0.482365	5.98518	5.31648	5.07998	3.63137	0	0.354588	0.0942642	3.7846	2.36366	3.88692	4.16894	0.59439	2.29904
1	151831760	151851760	Breast_SE_305_5	5.21861	5.53105	5.07616	6.16069	6.17455	5.30165	5.87537	5.32373	6.47988	5.74772	5.13191	0	0	6.82825	1.56715	5.48914	4.7809	2.92192	4.36378	5.164	4.76074	3.33834	4.2431	0	1.4796	3.3428	6.00028	0	4.19621	0	5.65198	5.67117	6.76871	5.68269	0	3.51803	2.80471	5.12329	4.29298	5.32534	4.84302	2.22317	5.22858
1	153342223	153362223	Breast_SE_309_1	2.88059	2.54343	3.69888	5.39271	0	1.60718	2.82241	2.81197	2.58798	5.00198	5.53357	0	0	4.15729	0	6.25235	0	0	6.42926	5.00648	3.27776	2.05966	1.99771	0	0	1.85243	0	0	0	0	5.95709	0	2.11477	4.20312	0	0	1.88227	0	1.34361	0.572076	4.0077	0	1.47948
1	153362223	153382223	Breast_SE_309_2	1.61777	0	0.893888	4.00477	0	1.75666	0.741541	2.65072	0	4.80221	6.00652	0	0	4.10963	0	6.18813	0	0	7.3762	5.45463	4.37385	0.631472	0.776538	0	0	3.41287	1.14735	0	0	0	5.7241	0	3.37862	4.85471	0	0	2.18908	5.5087	0.231457	3.09955	4.04727	0	3.61456
1	154403936	154423936	Breast_SE_314_2	5.22096	5.93401	5.00158	5.42705	7.035	6.34047	5.60435	4.89359	5.28781	5.15395	4.30386	1.61041	0.565761	6.75424	0	6.07345	5.0773	1.28526	3.145	4.64809	4.52578	3.80565	5.55062	0	5.52768	7.03948	4.20224	5.1844	3.69726	5.51466	0	6.8669	6.42387	0.0196783	5.76244	1.43004	3.22369	1.80159	4.94675	5.70353	5.17223	4.25774	5.0843
1	155981803	156001803	Breast_SE_322_6	4.23559	3.01463	4.28726	4.73902	4.33229	3.91032	2.35121	2.24198	4.66423	3.09696	0	5.17736	1.2835	3.57255	3.96256	1.92566	4.63932	0	0	3.29211	0	2.25566	2.1813	4.65756	3.51763	0	0	2.23305	5.7359	0	3.74302	5.18545	7.07308	4.41242	4.81024	0	0.722508	5.52609	3.88616	2.85658	2.79004	3.46512	2.95319
1	156460801	156480801	Breast_SE_323_2	4.47289	2.81324	4.65167	3.42635	2.83116	5.46092	5.32135	5.79517	4.14624	4.87323	4.25522	0	0	7.48869	1.02331	3.47863	2.44553	0	5.2968	5.75563	2.28751	1.49895	0	0.950375	0	5.14303	3.55077	0.475087	0	0	6.77901	7.57334	0	0	2.46979	1.40002	1.04118	7.05746	2.47941	5.08317	3.29064	4.1552	5.54122
1	156677984	156697984	Breast_SE_324_3	4.97812	0	4.24831	5.39161	5.31561	6.12453	5.25053	2.6491	2.47128	5.94274	6.47317	0	0.680959	7.49193	2.41399	6.69915	2.58942	0.456185	6.74396	6.46473	5.79973	3.40073	3.82229	0	0	0	7.20243	2.99179	0	0	6.54193	7.53061	6.46023	5.02895	1.87362	5.3749	2.39571	7.07333	1.62941	5.04344	4.11423	2.20562	5.18811
1	156697984	156717984	Breast_SE_324_4	5.44271	4.30449	5.84943	6.05718	6.12864	5.84291	5.67216	4.63116	4.3413	6.24141	5.59378	0	2.51401	7.60633	3.53417	7.79877	5.41094	2.16727	5.95172	6.02426	5.5587	3.39211	3.82103	0.847311	0.960276	1.6099	5.98473	4.48082	1.42825	0	7.3789	7.08413	5.77313	3.46038	3.66225	4.44523	2.30717	6.89264	0	4.52287	4.19687	4.193	4.67823
1	156889968	156909968	Breast_SE_325_3	2.46027	1.02682	3.46619	2.79984	3.3135	3.96384	3.6845	4.22157	3.47663	2.07517	0	0	5.24687	0	0.960799	0	0	4.19087	0	0	4.93325	3.56569	4.84568	3.77205	6.24556	3.4987	0	3.67448	6.84624	5.14165	3.55173	0	0	1.75298	5.51237	0	2.66366	0	2.10329	0	0	4.76007	0
1	157985626	158005626	Breast_SE_327_1	4.64522	2.68414	4.81727	4.25722	0	3.30109	0	3.70205	4.78494	4.2207	0	7.23187	5.57613	0	6.51003	5.99051	5.99876	4.09164	4.75341	0	5.83273	3.297	5.45933	5.62235	5.38611	4.64517	0	6.61309	4.93049	6.4011	5.79089	0	4.96916	5.69493	5.63499	0	3.32174	0	4.54783	1.4623	2.41775	4.33229	0
1	158005626	158025626	Breast_SE_327_2	6.15692	4.28589	5.93904	4.39505	2.16696	4.46709	1.84732	4.85797	4.93485	5.51626	0	7.65782	6.47081	0	6.6167	3.72529	6.87134	0.956981	5.21003	0	6.79782	4.39562	6.72057	6.19084	5.16383	5.13184	0	7.33	7.14391	5.95182	5.78558	0	6.04842	6.40376	6.46421	0	4.11469	0	5.51765	0	2.83201	4.90979	0
1	158025626	158045626	Breast_SE_327_3	0.668289	0	2.44461	0	0	0.324319	0	0	0	0.496287	0	5.47514	3.85574	0	5.04378	0	3.34609	0	0	0	4.44518	2.18713	4.29609	1.4746	2.69147	0.492255	0	4.45436	3.14594	4.54437	4.35252	0	0	4.28853	3.94005	0	2.33556	0	4.54196	0	0.31895	3.99692	0
1	159853897	159873897	Breast_SE_329_4	3.20703	2.00512	4.3787	4.57224	3.8254	3.01711	3.75467	2.62643	4.42364	0	0	2.00269	1.46944	4.77632	0	0	6.10141	2.97282	0	4.86464	4.13344	1.95661	0.77716	4.29967	3.98146	4.25581	0	4.51433	4.59395	5.06583	2.89929	2.53483	0.358237	3.89047	5.32718	0	1.80734	0	3.71708	4.6731	4.23257	3.78155	2.15359
1	159893897	159913897	Breast_SE_329_6	3.62011	2.12095	3.76821	3.39298	4.35788	4.2131	3.43692	4.5577	2.8081	3.12933	4.82437	0	1.36669	6.23237	0	2.7423	3.6265	2.17128	5.34538	5.12738	4.6391	0	2.54669	3.30857	0	0	4.23881	4.25018	3.25342	0	4.83419	5.54462	3.09034	3.45998	4.34966	4.32183	1.54213	7.48892	3.68359	4.44055	4.07	2.90628	4.84
1	159933897	159953897	Breast_SE_329_8	2.94241	0	2.71519	4.50206	4.77811	3.57979	4.4208	3.66882	2.95899	4.43935	4.15391	0	0	6.67492	0	5.08959	0	0	3.61111	5.7572	3.6511	2.34929	3.91697	0	0	0	4.89912	0	0	0	4.83894	7.20543	5.35228	3.62189	0	3.40464	2.02617	7.78247	4.16994	4.22272	3.55088	2.95198	3.9854
1	159953897	159973897	Breast_SE_329_9	0	0	0	1.78296	0	0	0	0	0	0	2.3999	0	0	1.66234	0	2.46326	0	0	5.4307	5.29786	0	0	0	1.51359	0	2.12019	0	0	0	0	4.27736	5.46107	5.81307	2.54877	0	0	0	6.56439	0	3.54323	1.44478	0	2.68152
1	160397697	160417697	Breast_SE_333_1	3.84266	3.19519	4.42659	5.73073	3.4795	0	1.96729	0	5.26532	3.3782	0	0	0	4.62902	0.40101	6.85741	0	3.17805	4.20711	0	5.8511	3.50214	4.32522	0	0	4.58797	0	0.766852	0	4.21956	4.3022	1.88342	5.74684	5.04837	0	0	3.2563	0	3.89536	4.61328	4.10635	3.77805	0
1	161018509	161038509	Breast_SE_334_3	4.16944	3.94198	3.85473	5.39848	5.77542	4.64484	5.1237	4.862	5.45603	4.28793	5.38025	0.826	1.37262	5.64707	2.63032	4.4853	0	0.447749	5.69364	5.19962	5.24506	2.62077	4.50566	0	1.45795	4.81016	5.14954	0	2.86916	0	4.86053	5.07317	5.56921	4.93313	0	4.23976	2.20894	6.60796	0.73571	4.23027	3.82737	0	4.7449
1	161078084	161098084	Breast_SE_335_2	6.87593	2.65794	6.97241	7.12548	7.68046	6.21871	5.00419	6.15126	7.01408	6.77502	5.72979	0	0	7.22481	0	7.43927	3.97045	3.06539	6.16644	6.94133	5.69331	3.608	3.03365	2.39361	0	2.96343	6.53079	2.61785	3.47982	3.26908	6.99522	7.45106	8.07262	6.45333	4.93137	4.85683	2.93562	8.31905	3.95425	5.94021	5.58655	1.76421	4.90564
1	164588104	164608104	Breast_SE_343_3	4.77345	4.58445	4.00496	5.82724	6.61092	4.06784	4.75219	5.30705	5.94274	5.31523	4.6871	2.76928	0.0356774	6.22588	5.67047	1.37096	0.370738	0	6.52095	5.18526	5.47643	0.474303	0	0	0	0	5.98675	4.95934	0	0	5.75328	6.99948	6.09723	2.77044	0	5.58454	0	6.51972	3.89379	4.71102	3.84283	3.61405	6.08432
1	164608104	164628104	Breast_SE_343_4	3.83884	3.4115	3.32725	4.78576	5.82451	2.07324	0	2.5346	4.5572	4.51514	3.36813	3.55318	1.39418	0	4.99837	0.669488	3.29894	0	4.88387	2.85377	4.30334	1.34483	0	0	0	0	4.32565	4.99645	0	0	4.28219	4.78132	5.66694	3.25254	0	0.125498	0	3.66402	4.11791	3.87518	3.9599	3.65071	2.6297
1	164648104	164668104	Breast_SE_343_6	0.872987	0	1.71709	2.93037	4.28398	0.802584	0	1.68187	2.22613	3.71634	5.05082	0	0	0	1.14078	0	0	0.774723	6.56025	4.27783	2.10028	0	0	0	0	0	3.59057	0	0	0	4.84436	2.95767	4.99063	3.32967	0	3.80846	0	3.8189	3.87091	3.54857	3.05284	2.96893	3.27854
1	167655015	167675015	Breast_SE_349_4	2.0367	0	1.37916	0	0	3.71015	0	0	0.264997	0	3.55558	0	0	3.81551	0	0	0	0	7.79365	3.57395	2.48454	2.92423	5.73728	2.08477	2.20914	4.17555	0	0.287388	0	0	4.95103	0	0	1.47579	4.25343	0	3.32912	0	4.13921	0	3.14508	2.32582	0
1	167789293	167809293	Breast_SE_350_5	3.66723	1.47579	2.68166	1.8672	1.14769	3.0236	1.12562	4.05952	0	3.80288	4.26906	3.78287	0	3.11428	2.15587	0	3.77697	0	5.67878	4.10216	3.80385	2.95431	4.73883	0	0	5.4805	0	1.36063	0	0	4.60736	0	0.743659	4.3524	3.80316	0	3.08824	0	3.70665	2.83154	3.53824	2.47214	1.65238
1	171214405	171234405	Breast_SE_360_3	4.20132	1.38362	4.51847	1.93476	3.32433	5.34425	1.14138	4.96724	3.05523	5.72782	0	4.74041	0	0	0	2.71507	0	0	7.21743	3.57768	0	3.3923	3.67565	1.77989	0.974695	0	0	4.15579	0	0	5.26297	0	5.68368	4.07182	0	0	2.60167	2.96315	3.15925	2.75232	3.13209	2.5944	0
1	175176629	175196629	Breast_SE_368_3	4.01856	3.82713	3.4693	3.88101	4.94579	4.71362	4.42118	4.27622	3.96084	4.90812	3.83113	0	0	5.67999	0	2.18691	0	1.5067	5.09388	3.29668	0	2.83688	4.79783	0	0	0	2.38734	0	0	0	3.58988	4.21046	3.10862	3.16786	0	4.13613	3.3097	5.70881	4.0711	5.07486	4.17404	3.18264	5.10957
1	180951950	180971950	Breast_SE_380_1	4.16876	2.59332	1.86523	4.93296	4.83744	3.87391	4.10115	0	3.14676	4.61168	0	3.65131	2.83854	5.70953	3.59731	0	0	0	2.53633	5.52837	2.77418	1.01935	2.75001	0	0	0.990123	3.59427	0	1.49876	2.64965	5.63488	0	5.07371	4.75489	0	0	1.53993	0	2.58664	2.474	3.18859	3.12495	3.98364
1	181114192	181134192	Breast_SE_382_4	4.57951	2.1806	3.96267	5.10728	3.83709	4.74559	4.27017	4.96545	4.09889	6.1939	5.65078	0	1.29397	6.92868	4.93136	4.24028	1.906	1.10567	6.31131	5.65525	4.51635	2.59051	3.5052	1.99525	1.06911	3.00286	6.51407	4.30952	3.94563	0	7.09579	6.92246	0	6.40925	4.12054	4.93525	2.73945	5.32849	3.50282	5.68441	4.61132	3.60586	4.85426
1	181134192	181154192	Breast_SE_382_5	3.74759	3.66249	3.48344	3.74784	1.49144	3.97551	3.07556	2.37661	3.68724	3.77993	0.880629	0	4.2113	4.82278	3.68108	0	0	0	3.91844	2.04049	0	2.72242	5.25157	0	3.62488	3.17994	4.2189	3.92555	5.09204	0	5.45031	5.23175	0	5.48843	5.06904	3.84474	2.77954	1.40038	3.55116	4.61937	3.92373	4.23599	3.67742
1	182136749	182156749	Breast_SE_384_4	4.3704	4.3617	4.32566	4.44298	3.97823	4.72395	3.69599	4.56608	3.61717	2.30359	3.0697	0	0	0	4.19413	0	0	0	5.66512	5.35643	0.579194	1.53195	4.47496	0	2.99994	5.23631	2.22778	0	0	0	3.28149	3.39175	0	0	2.13781	1.79753	1.79016	4.71226	3.02936	2.5878	1.96347	3.43782	3.34045
1	183230812	183250812	Breast_SE_388_12	1.65517	0.0195694	2.30373	0	0	0	0	0	2.0245	2.48475	0.883531	4.86674	3.55221	0	4.78396	0	5.10286	0	5.03412	0	0	1.65436	3.45529	2.79093	0	3.7705	0	4.4961	4.48872	0	0	0	0	2.97971	3.70361	0	2.90116	0	3.50909	0.554469	1.88537	3.61006	0
1	183270812	183290812	Breast_SE_388_14	3.85813	1.85493	3.94472	4.35664	0	3.20602	1.73225	1.05956	2.91214	3.77056	6.09435	7.06186	4.35933	0	7.07638	0	6.80777	1.92331	6.16752	2.1576	2.21195	3.42269	5.99847	6.10394	4.67301	5.63848	0	6.54548	6.06308	0	3.6378	0	2.1128	6.84752	5.65169	0	3.46798	0	4.62836	0	3.1611	3.45701	0
1	198480256	198500256	Breast_SE_406_1	4.06498	1.48557	3.50255	0	0	1.30904	0	3.03743	0	3.11001	0	6.70713	0	0	0	0	4.28848	0	4.13792	0	3.98509	0	0	4.44597	1.86383	0	0	4.8677	2.24824	0	0	0	0	4.42378	3.72911	0	0	0	1.44074	0	1.68323	0	0
1	200881981	200901981	Breast_SE_412_2	5.97416	1.7081	4.7796	5.91003	6.72465	4.18986	3.95653	5.5573	3.33687	3.91017	5.08847	0	0	5.84384	7.56272	7.83322	1.60825	4.45789	6.33414	5.94717	5.39204	3.92274	5.08462	3.72342	0	6.03997	4.47282	1.31801	3.74793	4.60036	5.73284	6.90368	2.32716	7.32686	2.06761	3.97018	3.17833	5.21375	2.68018	0	3.70714	0	5.2257
1	200901981	200921981	Breast_SE_412_3	2.6416	0	2.81067	2.67189	5.18049	0	0	5.03582	0	0	4.31442	0	0	2.52229	4.24087	5.14182	0	0	6.6901	5.74083	0.148798	1.34375	2.23968	0	0	5.0557	0	0	0	0	4.828	2.60563	0	5.27066	0	2.92987	0.851405	5.13063	3.01679	0	0	0	5.26631
1	201242985	201262985	Breast_SE_415_1	2.33283	0.783092	2.79052	4.69434	0	0	0	0	3.33131	0.293738	0	3.17317	0	0	0	0	0	0	0	0	0	2.93024	4.66806	0	4.23954	6.8022	0	0	0	2.13596	2.91483	1.63729	0.953164	4.58296	0	0	1.90874	0	1.84329	3.14717	2.81917	2.61803	0
1	201262985	201282985	Breast_SE_415_2	2.71935	0	4.10867	4.90674	0	0	1.44185	0	3.59047	2.8699	2.24431	4.64651	0	2.43362	0	0	3.5538	0	1.51744	0	0.241958	3.34308	4.24339	3.38125	3.59753	6.5915	3.36479	1.83514	4.54605	0.97165	3.76999	5.25473	5.21867	4.62812	3.36462	0	2.67072	0	2.31815	4.74677	4.76812	0	0
1	201282985	201302985	Breast_SE_415_3	4.59366	0.271895	5.24026	6.65335	0	0	2.77775	1.17493	5.39597	3.62021	0	0	0	5.08017	0	6.78163	2.09907	1.21102	5.78951	0	0	4.23602	6.884	0	5.93667	7.62223	5.40974	0	0	0	4.73849	7.12227	6.21676	6.0578	3.08166	0	3.93167	0	4.60588	3.97457	4.14677	0.713494	0.724232
1	201302985	201322985	Breast_SE_415_4	5.38496	0.910829	5.09923	6.57052	0	0.589021	4.45843	2.70036	5.28006	6.1196	0	0	0	5.57206	0	6.88186	4.18504	0	4.46856	0	0	3.38334	5.09269	0	3.03211	7.42764	5.93599	0	0	3.04182	5.61632	6.67156	7.29398	6.58962	0	0	2.57096	0	4.57979	5.29992	5.67218	0	1.37424
1	201382985	201402985	Breast_SE_415_8	3.67869	1.38217	4.21726	5.46918	2.53715	2.49195	5.33619	1.87007	4.67148	5.97938	4.21372	1.30825	3.51206	6.21409	5.04032	6.60038	0	5.08912	3.13552	3.62622	3.66407	4.02543	6.06407	0	4.53538	6.48331	5.50486	0	0	0	6.07483	6.67191	4.93712	5.30032	0	2.46423	3.31697	3.581	3.97379	3.5506	4.31879	1.44664	4.52165
1	201534922	201554922	Breast_SE_416_7	4.76028	4.02868	5.23062	2.79634	3.97573	4.62162	3.4904	4.47252	3.81811	3.55909	5.27076	0	0	0	0	0	6.74193	0	0	0	0	2.89968	0	5.98608	3.39082	0	0	5.69146	6.32741	1.38732	3.17287	0	0	3.50327	5.728	0	2.28692	0	3.83552	2.45534	3.2837	4.1864	0
1	201694922	201714922	Breast_SE_416_15	5.06206	3.7027	5.01735	1.6486	3.4628	4.15559	2.34559	4.20224	4.07029	3.53209	3.57395	6.94614	5.53116	2.59375	0	0	6.89916	0	0	0.429799	3.96335	3.52621	3.91352	6.41472	5.01507	3.38404	3.95982	6.77509	4.81597	3.73596	2.37019	3.49779	2.63848	5.28262	6.22176	0	2.68748	0	3.49519	3.91376	3.03726	4.64435	0
1	201714922	201734922	Breast_SE_416_16	3.50872	3.11262	4.65756	0	0.727389	3.59292	0	3.34823	3.63858	0.947304	0	5.37363	4.38847	0	0	0	5.38427	0	0	0	0	1.63897	0.429585	5.39834	2.64473	0	1.95745	5.74654	3.32213	0	0	0	0	1.23813	5.11715	0	1.61539	0	2.7759	1.07637	1.39403	4.57208	0
1	201734922	201754922	Breast_SE_416_17	4.18664	3.28419	5.1055	2.82261	3.08304	3.32939	1.14519	4.36507	4.63448	1.7567	4.15391	6.55277	5.73368	5.38765	0	4.93966	4.90898	0	4.63188	4.94593	0.726872	3.91679	5.58168	5.59088	5.30695	4.64745	6.15148	5.71164	2.34685	2.10365	5.08682	0	5.2674	6.0766	6.20412	0	4.23128	0	3.72551	2.68087	3.46959	4.19134	3.65165
1	201998467	202018467	Breast_SE_418_2	5.96713	4.89067	5.04606	6.40339	5.96136	5.44177	6.24406	7.00424	5.24204	6.98882	7.81115	1.92362	0	7.64209	5.49789	7.45743	3.48677	3.17381	6.77632	7.5342	5.61376	3.10645	1.55829	0	0	0	6.68233	2.04959	3.16821	4.11885	6.80862	7.72517	7.28444	6.56523	4.53282	5.01261	1.86245	7.44407	1.50491	5.34714	5.24327	0	6.37208
1	202018467	202038467	Breast_SE_418_3	4.76622	2.71281	3.94097	5.34965	4.82049	4.17761	3.95403	5.67538	3.62898	5.75129	6.46313	4.10663	0	6.16332	4.73517	4.96253	2.4263	2.24491	6.77615	5.86347	4.83788	2.4371	0	0	0	3.82329	6.81937	2.42696	4.02381	2.55465	6.54914	6.6885	6.59915	6.52415	4.64873	3.04042	0.122928	6.30648	2.5822	5.54934	4.92214	0	5.1768
1	202038467	202058467	Breast_SE_418_4	4.03354	1.824	3.63253	5.82259	5.5093	4.47522	4.10069	6.10746	2.89094	5.54594	6.94171	0	0	7.0974	2.65645	5.78833	0.863906	2.70545	7.08112	6.42742	4.35131	2.41118	3.80441	0	0	2.05446	7.09174	0	4.34251	0	6.82365	7.13625	6.77827	5.94985	4.64028	3.71677	1.28082	6.74075	3.92491	5.59729	4.83694	0	5.82153
1	202058467	202078467	Breast_SE_418_5	1.55204	0	0	2.36494	0.0988713	1.32338	0	3.82641	0	2.47271	3.62641	0	0	4.6259	1.20535	0	0	0	4.68864	2.27409	1.61895	1.01923	0	0.851234	0	0	5.68132	0	4.01404	0	5.27054	5.93233	2.86345	2.87496	3.74902	0	0.716922	4.20983	1.64479	4.00007	1.7356	0	3.78158
1	202078467	202098467	Breast_SE_418_6	4.12762	0	3.09396	5.12034	4.91705	3.33047	3.59352	4.07709	2.87746	5.28484	3.92177	0	0	6.46671	2.278	6.30334	0	0	5.98054	5.31746	2.20014	2.03705	0	0	0	0	6.61699	0	0	0	6.19492	6.76356	6.79387	4.96437	0	2.44308	0	6.32135	3.79163	4.00272	3.96588	0.589225	5.00925
1	202098467	202118467	Breast_SE_418_7	5.48368	3.72484	4.84862	6.27313	5.17032	4.75301	4.66355	5.75534	4.2095	6.43	7.26493	0	2.67501	7.57031	3.9925	6.61279	0	1.75113	6.14296	6.58454	4.40688	2.87456	0	0	0	0	6.70323	0	3.04425	3.25476	6.75366	6.21791	7.09726	6.54886	3.03637	1.95503	0.883862	6.67584	4.36597	5.7429	5.33218	0.757229	5.14834
1	202118467	202138467	Breast_SE_418_8	3.70216	1.02459	3.11697	5.32082	4.24984	2.89082	3.94084	3.09953	3.90118	4.98946	5.09083	0	0	4.44466	1.75469	6.35135	0	1.38703	1.76005	5.6713	2.40665	2.30335	0	0	0	0	6.06685	0.415326	0	0	6.16077	4.38963	4.61565	0	0.15879	4.08466	0.659805	6.29209	3.94521	3.2106	3.1569	2.03946	4.40222
1	202581226	202601226	Breast_SE_419_5	3.46051	2.06361	2.81477	0	1.86556	3.46299	2.26858	3.00456	1.70952	4.68485	0	4.89184	4.81065	0	2.40021	0	4.66135	4.17234	5.83235	3.61887	4.83425	3.80902	5.76695	4.73164	4.02794	0	0	0	5.04534	3.13817	4.09684	4.66633	0	5.75757	5.9198	0	3.26992	2.74204	4.81143	5.40115	4.50835	4.48411	1.14951
1	203302888	203322888	Breast_SE_423_3	4.94006	5.43381	5.23135	5.8713	5.8244	6.24016	6.10386	5.64144	5.58403	3.04391	4.36519	0	0	6.46996	4.45369	3.12464	3.37475	3.19048	4.23288	5.18989	2.51338	2.9118	5.2702	2.00582	4.18084	5.63224	5.01661	4.95139	0	1.17358	0	6.9279	4.25625	0	4.75176	3.20698	2.96359	8.3316	3.7688	4.7648	3.97783	3.64351	6.11237
1	203322888	203342888	Breast_SE_423_4	4.96871	4.72454	4.52458	5.67265	5.17458	5.52357	5.28657	4.98755	5.01993	1.8608	3.54527	0	0	6.32356	3.20083	2.44276	3.93002	0.189334	0	4.96059	2.8981	2.15626	2.957	0	0	2.76364	5.206	4.48429	0	0	0	6.65744	4.2933	0	0	2.63189	1.83247	7.63084	2.77848	3.69336	3.85382	1.79506	5.22135
1	203498414	203518414	Breast_SE_425_1	1.59425	0	3.46133	2.93271	0	1.90457	0	0.647174	2.22328	0	1.29693	5.16473	6.26698	0	0	0	3.84188	0	0	0	0	1.7251	2.07123	5.4844	1.97826	0.911591	0	3.55077	4.76399	0	0	0	0	3.77747	6.09521	0	1.46484	0	3.71582	4.34951	3.84706	4.65211	0
1	203658414	203678414	Breast_SE_425_9	4.43128	3.44524	4.7638	3.94012	2.89737	4.14652	2.54783	3.92515	4.77212	0	0.784172	4.42519	4.9651	0	0	0	6.25232	0	0	0	3.55407	3.01813	4.85826	4.23914	3.15343	0	0	2.74626	5.0437	0	0.84525	0	0	4.42645	4.73386	0	2.73035	0	4.69946	4.5368	3.61044	4.93761	0
1	204077402	204097402	Breast_SE_427_4	4.46041	0	2.85322	5.63067	2.24131	5.60235	4.94655	5.45983	4.15607	5.04532	4.35487	0.478677	4.67211	6.84339	2.99464	0	2.71159	2.70972	5.41704	6.20719	4.19052	3.07952	3.36024	0	3.51248	0	5.5273	2.74495	4.73864	0	5.88622	7.56461	2.6437	3.57856	4.54703	4.76953	2.12639	8.38218	4.94808	5.2279	4.31055	4.62931	4.71536
1	204097402	204117402	Breast_SE_427_5	2.54771	0	1.17816	2.70147	1.22118	4.25477	3.75307	2.20411	1.51089	3.92897	4.47259	0	5.55668	4.3777	0.695558	0	2.60809	0	4.75968	1.16813	3.47446	2.58282	2.6274	0	0	0	4.28471	3.30066	5.79045	0	5.15754	7.08247	0	5.3092	4.70609	1.6299	1.66025	6.52088	4.0667	4.51478	3.64119	3.4717	3.61424
1	204117402	204137402	Breast_SE_427_6	2.63394	0	1.85402	3.12681	3.26514	5.02775	4.25392	5.7508	1.57679	5.03058	5.63033	4.92978	5.30025	7.2811	1.2077	0	4.39351	0	5.4426	4.35711	5.01014	2.96581	3.12178	3.82527	2.46105	3.89372	4.64721	3.61141	3.81826	1.40385	5.15285	5.00635	0	5.24084	4.8905	3.5599	1.88867	7.87581	0.375118	4.4287	2.69946	3.64403	5.85159
1	204137402	204157402	Breast_SE_427_7	0	0	0.836276	3.60808	2.76265	5.08254	3.54026	6.04158	0	3.68732	0.468315	2.36725	2.05649	6.75362	2.73571	0	2.69804	1.7182	0	1.3229	2.23921	2.08149	0	1.44595	0	6.12865	3.85193	4.2624	1.13153	0.228932	3.33679	3.97341	0	0	0	0.849521	1.42076	7.40367	2.98204	4.0499	2.84355	2.8224	3.36257
1	204297402	204317402	Breast_SE_427_15	0	1.09434	0	3.4841	4.84286	2.77494	0	4.62818	0	4.14578	2.73232	0	1.48191	2.41503	0	4.44583	0	0	5.91032	4.95239	2.16947	1.21139	0	0	0	0	2.59101	0	0.0540213	0	5.49458	1.91611	0	2.28266	0	0	0.138943	6.10936	3.84364	4.20994	3.46811	2.96677	0
1	204437402	204457402	Breast_SE_427_22	4.35285	0	3.38941	4.80136	4.62964	4.7317	4.845	4.45664	3.92827	5.56355	4.83202	0	1.96851	4.84937	0.857	4.96237	0.531489	0	4.75813	5.90526	3.57705	2.24628	2.05586	0	0	2.92016	4.10629	0	0	0	5.26734	4.92784	3.31558	5.85619	1.42772	1.7758	1.79698	6.74425	4.36911	5.6414	4.49131	1.45893	4.83727
1	204557402	204577402	Breast_SE_427_28	3.83584	0	1.55733	3.54653	1.20865	3.71334	3.10864	0	3.12927	2.23612	2.74238	0	0	6.04852	0	0	0	0	3.58544	4.90706	3.47009	0	0	0	0	0	0	0	0	0	3.9701	0.506476	0.361544	0	0	3.80433	0	7.15215	2.46102	4.34867	3.43101	0.535078	4.47608
1	205281834	205301834	Breast_SE_428_4	4.65897	4.49462	4.25574	4.6188	4.37287	5.1936	4.19932	3.68344	4.4826	5.40373	5.59817	5.37429	7.01414	0	6.42374	5.36982	7.10917	2.8362	5.37708	0	6.73351	3.72074	5.80525	6.01726	5.12513	5.42239	4.25409	6.64206	5.7508	6.30271	5.56196	3.84771	0	6.54839	6.35848	0	3.31808	0	3.63802	3.69425	2.5439	3.55838	0
1	205428485	205448485	Breast_SE_429_1	5.26873	2.21457	3.9924	5.82767	1.40232	3.49337	2.5579	0	3.66438	5.38325	4.56303	5.50824	0	0	6.21501	0	2.87792	0	3.38083	2.36656	4.84629	3.77898	4.53528	0	0	0	0	0	0	0	5.7175	0	5.80323	5.82127	0	0	2.42174	0	3.50549	2.22258	5.08865	2.49503	0
1	205448485	205468485	Breast_SE_429_2	5.1302	2.57057	3.84955	6.79097	0	0	0	0	4.38003	4.97489	4.22969	6.00571	0	0	5.83696	0	4.14251	0	3.47364	0	5.43556	3.68519	4.95426	0	3.01259	3.3765	0	0	0	0	5.62172	0	6.75008	6.01787	0	0	1.9806	0	2.69144	0	4.13914	1.89217	0
1	205945606	205965606	Breast_SE_432_3	2.70709	0	2.23626	3.20241	0.962038	1.6392	1.44151	0	0	0	0	0	0	6.20728	0	4.30098	3.85381	0	0	0	0	1.41533	0	0	0	0	0	0	0	0	0	3.48151	4.49442	6.70814	5.08924	0	0.544262	0	4.51027	3.32264	3.97987	3.52775	0
1	206492999	206512999	Breast_SE_433_5	3.85467	1.05296	3.25557	4.75418	1.43631	3.51581	3.82883	3.26219	2.60711	4.01756	4.84534	0	0	4.78039	0	5.64069	4.60572	3.18612	1.85447	3.81524	0	2.27518	2.82491	3.25441	0	2.59348	0	2.997	4.16111	0	4.97804	0	0	4.35153	4.78047	0	2.12988	0	3.71274	4.76499	3.22167	3.87314	1.04202
1	206512999	206532999	Breast_SE_433_6	2.09876	0	1.25603	1.55735	0	0	0	0	0	4.13486	5.02788	0	0	4.14799	0	5.15571	0	0	4.97297	4.6889	0	2.25627	3.90372	0	0	4.79078	0	0	0	0	4.94308	0	2.66241	4.25735	3.27763	0	0	0	3.39236	1.82903	2.64937	1.51133	0.115109
1	206532999	206552999	Breast_SE_433_7	1.59918	0	1.20116	2.42308	0	2.16521	2.19247	0	0	1.9681	2.29551	0	0	6.06036	0	5.72478	0	0	3.51374	5.80194	0	1.4662	0	0	0	0	0	0	0	0	4.19968	0	3.53206	0	0	0	0	0	4.38345	1.84971	2.9617	2.02395	2.10401
1	206702573	206722573	Breast_SE_434_5	4.3878	3.15126	3.47709	4.47537	3.61487	4.88053	3.31555	3.64423	3.94745	3.74631	1.85816	4.29258	0	3.43299	0	0	4.09745	0	4.80035	4.82609	3.94355	0	0	3.23488	0	0	3.58901	0	0	0	4.44527	5.90871	3.54464	4.57093	2.87627	0	0.415281	4.26551	3.52989	4.09784	3.92768	4.08763	2.04844
1	206893478	206913478	Breast_SE_436_3	3.44864	1.83349	2.07219	3.4529	1.49952	4.45012	3.27555	3.92773	2.24644	4.49608	3.68226	0	5.62673	6.0526	0	0	5.93132	0.102933	5.83026	4.47722	4.56918	3.81235	5.43583	1.81948	1.38434	5.14309	5.79271	0	4.89792	1.83825	4.95229	5.19682	4.44004	6.18954	5.43801	0	3.30292	3.94434	4.00348	4.95125	4.47357	2.34182	0
1	206953478	206973478	Breast_SE_436_6	2.84858	0	1.36852	3.68283	0	0.151397	0	0.295218	0	3.88788	2.49915	0	0	6.29417	0	0	0	0	6.92926	5.47304	0	0.296872	0	0	0	0	0	0	0	0	4.21888	0	0.0955743	0	0	0	0	2.4874	3.11005	0	3.86605	1.73043	0
1	206993478	207013478	Breast_SE_436_8	3.84668	3.86109	4.74186	5.96839	0	0	0	3.9294	4.9016	5.1749	3.89982	0	3.3948	3.90718	2.31546	0	1.65645	0	6.07827	5.32864	4.87093	3.37462	4.794	0	1.33495	0	0	0.964348	4.51567	0	5.59243	3.44644	6.03525	6.46067	1.73435	0	3.12179	0.906675	3.89562	2.21624	4.52732	0.174291	0
1	206999320	207019320	Breast_SE_437_1	3.98985	4.04268	4.95878	6.11377	0	0	0	4.06999	5.10962	5.23307	3.87314	0	3.46013	3.74947	2.38314	0	1.32701	0.0288128	6.11244	5.38155	4.90059	3.70671	5.11357	0	2.10239	1.49445	0	0.905122	4.92318	0	5.7209	3.48781	6.02428	6.6612	2.23397	0	3.44148	1.08756	4.37131	2.00416	4.68265	0.524093	0
1	207019320	207039320	Breast_SE_437_2	5.27282	5.05084	5.5122	6.66984	3.77808	3.24531	3.55585	5.58955	6.24086	5.64889	4.04916	0	4.14649	6.52665	0	2.95455	0	4.21341	7.42246	5.56827	3.80167	4.16582	6.32322	0	4.83667	6.75787	0	0	6.5631	0.815903	6.13155	5.64433	5.88291	6.82115	4.96712	0	4.11768	3.33451	4.0095	3.40269	4.40515	1.90352	0
1	207798037	207818037	Breast_SE_440_2	2.04309	2.67813	2.6063	2.86304	4.64883	3.66775	1.11703	3.57679	3.86601	0	0	0	0	0	0	0	3.15049	0	0.914705	5.5428	1.88074	2.47925	4.46587	2.97689	3.76029	5.39165	1.19589	1.44944	5.23885	0	4.60436	2.95738	0	5.34452	5.54659	1.96328	2.21063	3.80028	4.46755	4.52562	3.35436	4.17159	3.07929
1	207818037	207838037	Breast_SE_440_3	4.9061	5.09705	4.74313	5.46594	5.31101	6.41464	5.82581	5.92492	5.00513	4.58931	2.78117	0	0	5.33996	1.82605	0	0	0	5.57125	6.07791	3.78953	1.57887	2.62955	0	1.97913	4.90218	4.34947	0	6.03237	0	5.00982	5.87767	0	3.32637	5.59264	4.36969	2.12129	5.65183	4.72915	5.90808	4.41388	4.56251	5.23453
1	208192639	208212639	Breast_SE_441_3	3.08942	1.47025	2.94689	0.691139	0.401409	0	0	0	1.83633	4.04359	2.81588	0	0	0	0	3.04189	1.74318	0	6.91842	4.5916	0.811132	2.34971	4.87632	0.778351	3.25404	3.77862	0	0	5.6491	0	3.94056	5.80655	4.19534	0	3.94513	0	3.02726	3.97664	3.8174	0	2.62443	2.03805	0
1	208212639	208232639	Breast_SE_441_4	3.74566	2.79443	4.06513	2.17148	1.45428	0.302272	0.899895	1.18473	3.24143	4.59103	1.85669	0	0	0	0	0	4.80326	0	6.05817	0	2.64472	3.43546	5.57357	1.76874	3.84776	3.28851	0	0	5.16004	0	5.26971	5.47777	4.58805	5.03543	4.66187	0	3.69936	0	4.69527	2.54186	2.75379	2.55171	0
1	208232639	208252639	Breast_SE_441_5	2.68236	2.78809	2.80485	3.3923	2.13516	2.31595	3.98307	2.62229	2.03819	3.60265	0.108821	0	0	0	0	6.29213	3.49661	3.26643	2.19784	1.3651	0	2.83652	5.26505	0	4.50355	4.86604	0	4.1843	4.95489	0	3.24861	5.99355	3.07153	3.16022	4.91141	0	3.33555	0	3.5976	2.56864	2.7696	2.14457	0
1	209352909	209372909	Breast_SE_442_2	4.72904	1.34362	3.46003	4.79294	3.83744	0	0	1.35661	2.56332	5.51262	5.45552	2.23599	0	0	0	0	0	4.02281	8.71431	4.27114	4.66459	4.01719	6.30405	1.69457	2.05493	6.97487	0	2.48361	0	0	6.10453	2.697	5.78482	5.58133	5.53423	0	4.61911	5.54941	3.24695	1.9897	3.25123	0.939062	2.80698
1	209372909	209392909	Breast_SE_442_3	2.51424	0	0	2.46329	0.61953	0	0	2.08091	0	2.3457	5.64317	0	0	0.450517	0	0	0	3.36694	8.24294	3.65512	3.48357	4.02565	6.09625	2.41924	1.06834	5.8783	0	0	3.75401	0	4.72805	0.853491	0.634678	5.18876	5.478	0	4.67598	5.28264	3.2288	2.42493	2.63872	1.06091	2.73836
1	209392909	209412909	Breast_SE_442_4	4.47562	1.51568	3.40944	3.68136	0	0	0	1.95115	0	4.44781	4.77139	3.01891	0	0	0	0	4.28042	3.68285	8.73192	1.07088	5.70802	4.34448	6.31507	2.74672	2.26288	5.63058	0	0	3.13387	0	4.98043	0	4.87992	6.47925	5.84109	0	4.65703	2.44384	3.75023	3.1345	3.60522	2.36753	0
1	209412909	209432909	Breast_SE_442_5	5.88744	1.56402	4.0427	6.28732	5.98205	0.748612	5.76281	2.36867	1.35592	5.58616	6.0841	0	0	5.79335	0	2.32127	0	5.06837	8.4746	5.4159	5.72502	4.36917	6.39817	0	3.89798	7.17617	3.34534	0	0	0	5.81714	5.68154	2.65478	6.05325	5.90381	4.70536	4.33342	6.36892	4.3462	3.5499	4.40347	2.49393	3.28736
1	209640032	209660032	Breast_SE_444_3	5.7454	4.49264	3.95668	5.13634	0	2.29622	1.53007	3.50092	2.51241	3.17575	4.52378	0	5.05967	0	0	0	6.83723	2.59536	6.66186	3.42765	5.1793	4.40225	6.76209	5.03404	4.53543	6.70247	1.65993	3.91314	6.30488	0	0	5.68639	5.09874	7.05676	6.05297	0	4.44992	4.27262	5.0058	5.69869	5.27543	3.70706	0
1	209788938	209808938	Breast_SE_445_4	5.2925	3.6992	3.83492	5.81251	3.26405	3.15423	3.85299	5.43506	5.36142	4.71248	2.24431	0	0	2.68814	0	0	0	0	4.09844	2.67667	2.67236	3.24923	4.89472	0	0.749833	5.65929	2.56219	0	0	0	1.04163	5.7848	5.01859	4.65344	0	1.64634	3.07349	4.18358	3.43659	4.43807	3.78158	2.57526	3.25903
1	209808938	209828938	Breast_SE_445_5	5.44255	2.41729	3.84116	6.00393	1.6798	2.85755	2.72537	2.72132	4.86739	4.71475	0	2.68751	0	2.90514	0.268217	0	2.53419	3.203	6.75061	0.109143	2.77591	3.61569	5.7258	0.887067	3.13072	5.9817	1.54632	2.17206	3.24802	0	0.935418	5.43756	6.06353	4.31451	4.30108	0	4.13718	1.62198	3.87987	3.56972	3.54149	1.897	2.21971
1	210219272	210239272	Breast_SE_446_1	3.96032	4.02041	3.61732	3.92697	5.17594	4.14905	4.47437	3.5443	2.68255	4.81409	2.94348	0	3.50649	5.47518	0	5.04385	6.24851	4.26587	0	4.56102	4.61451	2.19711	3.49591	5.23529	3.68444	0	4.35171	5.57005	5.20094	5.05402	4.04501	0	5.43882	4.59288	3.18074	3.3005	1.65745	4.92998	3.06986	4.15361	3.34418	1.97562	4.89822
1	211587604	211607604	Breast_SE_452_2	4.02377	3.31107	4.2626	4.11314	4.4032	3.85937	1.54257	4.69708	3.2705	4.64127	4.93257	0	0	0	0	0	5.35138	0	6.0677	4.68254	1.72808	1.30764	0	0.813658	0	0	3.35957	1.46344	2.33616	0	3.97082	0	3.43431	4.57825	3.17707	0	0.628902	0	1.49002	0	1.39234	0	4.59493
1	211627604	211647604	Breast_SE_452_4	4.77464	5.57729	3.71166	5.03024	5.09831	4.2211	3.34482	4.29649	3.54293	5.91225	3.2138	2.58809	0	4.2274	1.98336	4.74109	6.02782	0	5.76221	5.7294	4.29506	1.57844	1.41283	3.55651	0	2.7978	2.73045	3.96532	5.18137	0	5.00519	3.59526	6.70567	5.11461	4.78271	0	0.28165	5.03711	3.94514	3.34984	4.03223	0	2.91355
1	212454625	212474625	Breast_SE_456_1	5.0112	4.0858	3.4046	5.66839	4.87558	4.3906	4.94488	4.9003	3.90505	5.88531	5.95314	2.21184	0	3.32756	0	5.94752	0	3.00862	5.5873	6.35508	3.4335	1.30737	0	0	0	0	3.99106	0	0	0	6.81584	0	5.89263	0	0	4.46189	0.0798737	6.79413	0	4.44272	4.42305	1.49957	4.30449
1	212474625	212494625	Breast_SE_456_2	4.90823	4.40248	3.78125	3.92878	3.05492	5.12727	4.42227	5.44815	3.54438	4.08317	4.1802	0	3.41598	0	0	0	4.77262	0	3.62708	3.32442	2.65634	0.369729	0	0	0	0	1.96232	0	2.88486	0	4.48398	5.76112	6.29375	2.87164	2.27936	0	0	3.92527	4.50581	5.81037	5.37071	3.57558	0
1	214428912	214448912	Breast_SE_461_6	4.38541	1.19771	3.29447	3.40236	0	0	0	0	2.25935	2.77523	1.84477	4.64079	1.7899	0	0.872749	0	3.60669	0	5.69665	3.42895	5.02194	3.25912	4.68616	3.80098	0	4.81659	0	4.86824	4.06145	0	2.08051	0	4.96249	4.12074	4.31176	0	3.70422	0	2.65555	0	2.56419	1.09553	0.192188
1	214568912	214588912	Breast_SE_461_13	4.24978	1.73101	2.68636	3.78782	2.18893	1.63563	0	1.23851	2.15331	4.0748	2.54125	0	0	0	0	0	2.93996	0	6.77059	4.31435	3.76742	3.58138	4.32434	0	0	5.36514	0	0	3.25604	0	4.21924	0	5.10918	4.41294	3.53909	0	3.43417	3.34922	2.61501	1.81166	3.49426	0	2.66426
1	215470419	215490419	Breast_SE_463_2	0	0	0	0	0	0	0	0	0	0	3.75125	2.23126	0	0	0	0	1.58518	0	5.44584	0	5.78483	0	0	0	0	0	6.0245	1.94886	0	0	1.99282	0.251632	0	4.48283	0	6.6066	0	1.48603	0	1.48187	0.957028	0	4.595
1	218329964	218349964	Breast_SE_466_2	4.73964	5.71546	4.18704	4.53293	3.79764	4.84457	5.34663	4.84619	3.74052	5.07256	0	4.50435	4.73509	1.85761	1.62936	2.23484	6.38677	3.14982	5.72047	6.16846	6.8991	3.25895	4.58029	5.68499	4.09617	0	5.09872	5.94009	6.04338	5.1814	5.73777	0	5.33567	7.06396	4.76236	0	2.98047	4.16954	2.20673	3.24274	3.33136	2.89231	0
1	218369964	218389964	Breast_SE_466_4	2.83888	2.8588	2.66314	0	0	1.91747	1.64606	0.290783	1.39084	3.39332	0.0188939	2.90674	0	0	2.85524	0	5.03485	0	6.12516	5.587	6.62919	2.52831	2.37051	3.18	0	0	5.14259	3.52315	4.62539	2.40723	4.92154	0	2.1802	7.91822	3.13362	0	1.68201	4.21789	3.05645	1.98896	2.64889	1.88171	0
1	218449964	218469964	Breast_SE_466_8	4.58546	5.16259	3.96444	3.21374	0.794865	3.12776	0	2.8363	3.07265	4.05658	0	3.69127	0	0	0	0	5.20191	0	3.80065	4.13173	5.92927	1.38147	0	3.74238	0	0	1.79681	4.40775	4.45018	1.85988	4.05069	0	4.26581	5.75061	3.5281	0	1.21948	3.40109	2.22477	2.41353	2.73086	2.47815	0
1	218469964	218489964	Breast_SE_466_9	4.03026	0.835549	3.52118	1.26336	0	3.64691	1.21908	3.13253	1.10608	3.70434	3.74225	0	1.90866	0	0	0	3.93207	0	6.66316	5.04614	7.03119	3.87662	2.99292	4.54027	0	0	6.27478	4.3709	5.20294	2.88627	5.60368	0	3.24051	7.08428	2.59121	0	3.83521	3.51681	0	2.58713	2.49187	0	0
1	218489964	218509964	Breast_SE_466_10	3.12308	0	2.27826	3.17621	0	1.28206	0	1.86447	0.601262	0	2.65685	2.86754	3.44584	0	0	0	3.87445	0	5.39562	3.5122	6.52068	3.33415	2.09217	4.13701	0	0	2.97532	4.36636	5.44469	0	5.28612	0	0	6.96682	2.96007	0	3.22961	0	1.18247	1.27399	2.00828	0	0
1	218569906	218589906	Breast_SE_467_2	0.208426	0	0	0	0	0	0	0	0	2.64571	0.97919	1.75414	1.42911	0	0	0	4.38233	0	4.67886	0	5.46476	0.774008	0.846601	0.421112	0	0	0	3.52291	4.71664	0.878508	3.92343	0	0	7.07684	2.12169	0	1.80067	0	1.75008	1.02485	1.81209	1.05315	0
1	218657910	218677910	Breast_SE_468_3	0	0	0	0	0	0	0	0	0	0	0	0	1.76331	0	0	0	3.85167	0	4.23311	3.46455	6.28477	2.34105	3.27403	4.03813	0	0	0	4.49128	5.11857	0	4.40386	0	0	4.96528	3.3682	0	3.25913	0	0	0.375911	0	0.536153	0
1	218697910	218717910	Breast_SE_468_5	0.421941	0	0	0	0	0	0	0	0	0	0	0	0	0	0	0	3.81417	0	6.12052	3.03295	4.94145	2.86866	4.13638	2.99749	0	0	0	2.59689	5.38663	0	4.1011	0	0	6.87855	3.75321	0	3.60724	0	0.934987	1.38945	0	1.67609	0
1	220516265	220536265	Breast_SE_475_1	2.00418	4.2558	3.14068	4.57021	1.54825	1.35133	4.12184	2.66752	2.11532	4.05129	0	4.15781	2.00631	5.88518	0.0930614	5.75485	0	4.41459	4.69971	4.68621	3.87936	2.70161	4.61906	0	2.74973	5.05851	0	0	1.20895	3.8864	1.2495	3.05988	4.68553	0	4.10922	0	2.66487	3.92573	3.75324	3.45359	3.6439	3.73982	5.28296
1	220869781	220889781	Breast_SE_476_1	3.99026	3.45616	3.20183	3.01616	3.67191	4.65261	4.59534	4.59383	3.73065	3.10444	0	5.05016	5.03264	3.18604	0	0	4.29529	0	0	0	0.143551	0.996464	0	5.08584	2.68829	0	0	5.82735	3.26199	5.10914	0	0	0	0	3.81698	0	1.16492	0	1.40859	0	0	2.09984	0
1	221825821	221845821	Breast_SE_479_3	3.81695	1.67414	3.54532	2.80955	3.8148	4.24757	0	4.56604	2.59169	4.36233	0	0	0	0	0	0	3.75379	0	6.77037	0	0	2.79758	4.55092	0.236778	0	4.42273	0	0	5.10647	0	2.58777	0	0	6.06391	3.8736	0	3.65312	2.53479	3.4029	4.03712	2.7457	0.791748	4.09046
1	221957862	221977862	Breast_SE_480_2	2.60092	0	3.12558	0	0	0	0	0.203328	0.748542	2.54772	3.38825	0	0	0	0	0	3.79509	0	7.11511	0	5.46428	0.949201	2.36214	1.7603	0	0	0	5.08383	3.53071	0	0	0	0	7.43649	0.317795	0	2.48161	0	0.457571	1.06473	0.709682	1.03352	0
1	223120659	223140659	Breast_SE_483_1	4.61369	0	3.37697	5.2318	3.85264	2.26418	1.9088	1.93827	3.0816	5.27446	2.43408	0	0	2.85146	4.9606	4.06951	0	0	5.84641	4.55281	2.5828	1.59364	0	0	0	0	2.8749	0	0	0	4.50926	2.17127	5.97205	4.53795	0	1.73291	1.42212	4.4834	2.01325	2.80351	3.06909	0.362391	5.2084
1	223716355	223736355	Breast_SE_487_3	5.32558	4.22337	5.11885	4.45439	4.30448	5.47669	5.64661	5.82198	4.31228	5.44142	4.61105	5.43709	5.56878	5.91644	3.70155	0	5.21171	1.59153	4.94047	7.31725	6.54907	2.8364	3.90616	3.48638	3.69223	2.11676	3.40229	2.16268	6.52845	4.59854	6.39379	4.30749	7.41433	6.58335	5.21462	1.61751	2.14638	5.06295	4.2017	4.87348	3.66836	4.99807	4.33203
1	223736355	223756355	Breast_SE_487_4	4.21393	1.68039	3.63654	3.50725	3.86777	4.00109	4.26458	5.12108	3.61743	4.78861	3.7186	4.32711	4.50419	5.16657	3.88664	0	3.84365	2.27577	6.03577	6.37838	4.98995	2.74287	2.46319	0	0.450814	0	0	0	4.73256	0	5.41309	1.87671	6.39746	0	2.89291	0	1.82793	3.00307	2.01677	2.33705	1.86531	2.62582	3.23444
1	225735061	225755061	Breast_SE_493_6	4.96138	3.11274	3.46751	3.88643	2.37107	4.4984	3.87874	5.26621	2.51453	4.3568	0	5.53537	0	3.23873	0	0	5.7182	0	5.65518	3.86212	5.31818	3.03498	2.57261	3.69863	0.819489	5.23447	0	5.54024	1.80859	3.24802	3.37348	2.20732	4.16762	5.93949	5.41854	0	2.38654	3.44873	3.42752	3.659	4.39683	3.27428	2.77855
1	225755061	225775061	Breast_SE_493_7	5.97019	2.67635	4.94368	4.30339	4.201	5.41414	4.55004	6.17281	4.0668	5.67868	4.82825	5.51668	0	5.59648	2.32546	3.95572	6.30065	0	6.93085	6.79109	6.13064	2.89974	3.0113	4.1592	0	0	2.54824	5.69452	0	0	5.35594	5.69754	5.03969	4.5859	5.34622	3.08701	2.02536	6.70092	4.66258	3.75972	4.05709	4.36338	5.23329
1	225815061	225835061	Breast_SE_493_10	3.92206	4.96466	3.09457	0	4.20021	2.97413	3.31448	2.93017	2.06123	3.51798	5.40384	3.48642	0	4.11762	4.12141	3.63891	5.97673	0	5.47562	6.80363	5.96678	2.10354	0.914535	4.20176	0	4.34063	0	5.52795	2.8062	0	4.64238	2.07264	0	4.79034	4.82741	0	1.1531	3.44603	3.59935	2.56307	0	4.31314	2.98205
1	226642689	226662689	Breast_SE_498_2	5.67069	6.45082	5.24113	6.35624	6.24946	5.50194	5.16283	4.28419	5.12069	6.14844	0.21673	2.06882	0	4.50301	3.66483	5.98881	0	0	0	5.8696	3.89553	2.52792	3.3181	0	0	0	2.10848	5.58747	0	0	4.90437	2.54206	6.93651	0	1.6574	0	2.35687	3.03249	4.02617	4.13531	4.12062	4.81564	2.61407
1	226662689	226682689	Breast_SE_498_3	5.16026	6.58407	5.23051	5.37261	5.83504	5.46548	4.45018	4.56698	5.1216	4.90043	0	1.51247	0	5.92916	1.70903	2.2537	0	0	0	6.1956	4.46071	1.0202	0	0	0	0	0	3.34987	0	0	4.2674	3.98629	6.15195	0	0	1.91684	0	5.08311	4.5269	5.21301	4.2996	4.46399	2.78711
1	226974375	226994375	Breast_SE_499_3	1.55679	3.87233	2.08182	4.73456	5.2121	4.60279	4.10157	3.42925	3.21673	5.31901	4.19581	0	0	7.27065	4.27337	2.56618	0	0	2.34011	5.68643	4.26757	1.66757	0	1.22495	0	3.38157	3.86389	5.54394	0	0.974148	5.16612	5.24689	3.89485	0	3.36078	3.17016	0.257163	4.55255	2.57694	4.34805	3.74553	4.48623	5.04805
1	227878339	227898339	Breast_SE_503_1	4.13243	1.52789	2.4417	5.66786	2.04983	4.79375	3.46744	3.16984	1.89987	5.44318	4.89048	0	0	3.10826	5.90746	0	2.38998	5.87455	1.83863	4.68918	0.409708	3.9136	5.13409	0	2.51371	4.49183	4.1402	0	0	0	7.42072	5.39197	0	0	0	1.25799	2.59113	5.46746	0	3.50251	2.65707	2.74573	0
1	228196365	228216365	Breast_SE_505_1	2.16492	2.43275	1.76765	0	4.39191	2.83806	2.88602	0	1.90767	4.07821	5.10891	0	3.23897	4.7311	3.79223	3.78343	5.76259	5.24061	0	5.77682	6.47076	2.13496	2.12604	0	0	0	3.07037	5.67095	0	5.44148	5.16727	1.3536	0	2.83279	0	0	1.64423	2.26526	0	0	0	2.2879	0
1	228361129	228381129	Breast_SE_506_4	3.54328	4.68399	1.86699	0	5.3053	3.20926	4.49779	2.72895	4.10901	5.92872	0	0	0	4.39636	2.65072	6.08846	3.76603	5.27508	0	6.90559	4.68394	1.80589	0	0	0	3.35412	4.38511	1.7699	0	4.08641	5.86732	3.6907	0	5.12919	0	1.79013	2.38115	3.90044	0	3.45088	2.49121	3.07354	2.66926
1	228541129	228561129	Breast_SE_506_13	0.264166	0	0.137393	0	0	0	2.76356	2.2572	2.29747	0	0.808811	0	0	0	0	0	0	0	5.03871	6.76516	3.51126	0	0	0	0	0	0	0	0	0	7.6351	0	1.13454	0	0	0	0.55637	0	2.40192	0	1.93489	1.41779	0
1	230071245	230091245	Breast_SE_512_2	4.1473	2.03315	3.97807	4.50496	2.03729	1.90674	0	3.41337	3.5432	3.30398	4.32678	5.86348	4.66902	0	2.33371	0	5.06633	0	5.97854	2.90613	6.31661	3.37911	5.34294	5.37199	2.83432	5.40282	4.18186	5.39832	5.36534	3.71751	3.96307	0	4.26612	6.00569	6.0528	0	3.00669	1.84114	4.30357	5.30502	4.01348	3.66413	0
1	230091245	230111245	Breast_SE_512_3	3.80316	1.25526	2.04923	3.35174	3.54638	3.70881	1.15773	1.96314	3.6315	3.6978	4.40982	4.38662	4.04335	0	0.701917	0	4.36889	0	4.51171	4.13831	6.05621	2.30366	2.71974	4.09131	0	0	0.0440999	3.81945	4.75102	3.98024	3.10314	0	0	5.63771	4.83342	0	1.15247	0	2.74036	4.95423	3.99553	1.98138	0
1	230743169	230763169	Breast_SE_513_2	0	0	0	3.95021	0	3.67466	5.83857	6.62777	0	0	1.18095	0	0	7.58673	1.3174	0	0	0	5.77575	6.68041	0	0.257262	0	0	0	0	6.16028	0	0.705241	0	4.56066	7.36418	0	0	0	4.72355	0	7.47452	0	5.37754	0	2.05343	6.79582
1	230843169	230863169	Breast_SE_513_7	7.14503	3.96548	4.65881	2.65254	5.35804	4.02193	3.52471	5.1295	4.59873	6.21388	1.89904	1.84569	0	0	5.30969	0	4.46531	0	3.63205	5.36736	4.97828	0.506342	0	5.1719	0	0	0	4.96775	4.31517	0	5.76551	0	3.31412	0	3.91557	0	0	0.296572	1.93131	3.30409	4.27998	3.22133	3.05736
1	233107849	233127849	Breast_SE_524_3	5.07727	2.66902	2.55545	3.2843	1.67842	0	0	2.57097	2.43698	5.11633	4.99955	0	0.384669	0	1.51525	0	5.23258	0	6.36154	3.80837	5.17441	2.2563	3.98318	0	0	3.94801	0	2.35861	4.8202	3.27359	3.91266	1.89476	3.42651	6.30526	4.72039	4.2472	2.86226	2.754	1.89677	3.21804	4.00955	0	2.37274
1	233603244	233623244	Breast_SE_526_1	4.81998	0	0.616934	2.55383	0	4.70391	5.11771	5.13783	3.89744	5.08365	5.76679	0	4.1746	0	3.36504	4.69316	0	5.06364	3.83892	5.2553	4.39279	2.44618	3.86343	0	3.53839	5.05784	5.22921	0	1.31636	5.35529	4.19817	3.81696	5.7932	5.50238	1.97766	0	2.43163	5.22924	2.17347	2.16987	3.2688	1.96313	4.51761
1	234491791	234511791	Breast_SE_530_3	5.6767	5.13493	4.67282	4.74729	5.11015	3.12588	2.91581	2.81617	4.22707	6.15586	5.50359	6.09692	0	0	5.25713	4.52979	5.60033	0	6.72291	4.01018	6.14281	3.60051	3.61701	5.12582	0.31513	3.04156	1.07597	4.32935	3.90094	0.581633	5.87201	0.857029	7.48521	6.92491	5.05448	0	3.42098	2.24337	3.11797	3.89553	4.00299	2.91278	1.52822
1	234651791	234671791	Breast_SE_530_11	5.62277	4.118	5.27754	4.50493	4.03409	5.12739	3.16369	3.72588	3.62856	5.36801	3.45661	5.69014	0	0	1.17785	3.39858	4.97059	0	7.09931	4.74782	3.27212	3.14371	5.44534	4.71886	3.41034	4.46118	1.73822	3.03404	5.88675	0	4.63198	1.10275	5.24253	6.45244	5.6341	3.01497	2.78766	3.48641	3.63561	3.54166	3.80023	1.58662	3.12877
1	234711791	234731791	Breast_SE_530_14	6.98203	5.56674	6.4182	6.14085	6.04706	6.24162	4.83805	6.42785	5.30144	7.02889	6.2528	6.5796	0	6.62528	6.30556	6.16736	5.99794	0	7.17458	5.8451	5.50982	3.6782	4.93853	5.79122	1.99985	0.671035	6.11236	6.5707	5.90767	1.28393	6.21243	5.7963	7.69976	6.90366	6.04419	4.07509	3.02453	6.40522	5.3145	5.34239	5.27984	4.55111	3.42551
1	234859178	234879178	Breast_SE_531_4	4.30027	2.48911	3.58979	3.33366	4.33512	5.07965	2.85013	6.06472	2.61129	4.06017	2.95151	2.80695	0	4.06487	5.10945	0	5.82719	0	7.19848	4.75686	1.75885	2.59812	0	3.8938	0	0	4.2768	4.8886	4.49656	0	4.13126	3.8561	0	3.08493	5.58855	2.51593	1.97319	5.3875	3.96062	4.42215	2.66162	2.30269	4.31747
1	234919178	234939178	Breast_SE_531_7	4.78255	3.73973	4.25526	3.59143	3.14162	5.04383	3.87847	5.83639	3.87897	5.30325	3.86156	4.39744	0	0	5.39499	0	5.48688	0	5.10237	3.4705	2.84658	2.22707	0	5.05342	0	0	0.54532	3.78228	4.32449	0	4.4736	2.11644	1.75747	3.97208	5.5985	0	1.05009	3.59352	3.87311	4.47115	3.80958	3.10809	0
1	234939178	234959178	Breast_SE_531_8	3.73762	2.99059	3.27495	2.97621	2.73795	5.06029	3.60086	5.22771	1.99271	2.9343	3.99296	5.407	0	5.57	5.7276	0	5.65304	0	5.31426	5.2769	4.50646	1.73905	0	3.3402	0	0	4.64179	4.37705	4.50009	0	3.62855	5.33855	0	5.09807	5.05708	0.852633	0.841838	5.97922	1.68155	4.19297	2.67305	2.52666	4.26962
1	234959178	234979178	Breast_SE_531_9	6.92368	5.51239	5.99314	6.34302	5.586	6.84264	5.66778	7.2436	5.29599	6.29401	6.80124	6.86114	0	6.54547	6.94074	2.76335	7.82436	3.31747	8.75981	6.79219	5.93331	3.39667	1.64372	5.96161	0	0	5.62831	6.88499	6.5423	2.75211	6.55332	6.12846	6.03771	8.29804	6.64069	5.47175	2.97962	6.79033	4.67895	5.62028	5.32585	4.30908	6.09862
1	234979178	234999178	Breast_SE_531_10	7.40488	5.54889	6.37825	6.50165	5.29518	6.1141	5.18845	6.74172	5.89533	6.88424	6.22759	6.95728	0	3.55743	6.39031	3.07916	7.58301	2.90182	7.61031	6.02341	6.12938	4.0674	4.56581	6.30779	3.13547	3.61197	4.61088	6.66763	6.41609	2.73079	5.96581	4.28763	7.77995	7.71157	6.60546	2.92358	3.52304	5.25758	5.40483	5.2451	5.85276	4.53298	4.19944
1	234999178	235019178	Breast_SE_531_11	5.49749	3.75699	4.98797	4.55548	3.63217	4.80996	2.171	4.74563	4.00955	5.37305	2.6163	6.25943	0	0	3.63841	0	6.22662	0	5.25574	1.65734	3.3038	3.39653	2.85767	4.86206	0	0	0	4.23467	3.30957	0	3.71573	0	0	6.13145	4.89626	0	2.79027	3.34885	3.37721	3.00868	3.59682	1.64206	0
1	235059178	235079178	Breast_SE_531_14	7.44259	6.10016	6.47601	6.51313	6.64103	6.96725	5.61174	7.25354	6.13301	7.58647	7.33469	5.9349	0	5.6064	4.2882	6.8808	7.76981	2.7106	8.53386	7.20696	6.43737	3.9288	3.27173	5.81952	0	4.38629	6.77086	5.77479	6.10081	0	6.96709	6.50611	7.60719	8.12783	6.79124	5.09782	2.63535	7.01835	5.38554	6.69035	6.36595	4.56522	6.35566
1	235079178	235099178	Breast_SE_531_15	6.12104	4.3931	5.55516	5.65057	4.50773	4.67193	3.61056	4.49601	5.15091	5.45847	5.48813	5.26382	0	2.8344	6.042	4.38898	5.97704	0	5.84729	4.907	4.55933	2.47083	0	4.36249	0	0	3.70017	5.19482	3.81348	0	5.40046	3.73029	5.34823	5.0521	4.68234	1.88468	1.07907	5.04939	3.62887	4.6393	4.27313	1.89198	2.15792
1	235895655	235915655	Breast_SE_538_3	4.05961	0	3.79446	3.74834	0	0	0	0	1.69547	0	4.27143	6.19641	6.4359	0	0	0	5.45521	0	6.27096	2.98078	4.5269	2.73629	3.97988	4.2948	3.13587	3.6821	0	5.46893	5.79559	2.93934	3.72389	0	4.44607	5.86269	4.52238	0	2.96601	6.02775	2.34337	3.15477	0.675024	1.90783	3.37961
1	235915655	235935655	Breast_SE_538_4	3.02487	2.16034	3.64023	3.63805	2.75703	3.02539	1.41112	1.57598	1.86301	0	3.48206	5.71129	4.97689	0	0	0	5.59978	0	6.68541	5.06824	3.28941	3.19984	4.88039	4.21027	2.50209	5.13409	0	5.44549	4.38538	0.613558	2.0482	0	0	5.13938	3.2996	0	2.97545	6.44417	3.84265	3.96124	1.90057	2.99863	3.5146
1	236138861	236158861	Breast_SE_539_1	4.14622	4.52431	4.70179	5.1586	4.72251	5.1857	5.23085	5.18366	4.462	3.26731	3.68436	0	0	7.07478	0	2.86619	0	3.06794	0	6.31084	0	2.2167	0	0	0	0	4.32881	3.9674	0	3.63054	2.35374	0	0	0	2.27003	3.056	2.51566	4.38217	2.02446	3.08707	0.364176	2.301	4.53966
1	241590938	241610938	Breast_SE_545_2	5.51596	1.40447	3.45298	2.89817	0	2.42267	0	3.88503	2.47162	5.69701	0.633142	5.96417	0	0	0	0	1.49373	0	6.48074	3.95782	5.4736	3.16453	4.29514	0.442526	0	3.05953	0	0.878598	0	0	4.65752	0	0	6.16227	1.98775	0	3.24345	0.246137	1.78405	3.34188	2.95638	1.76959	2.23473
2	25758	45758	Breast_SE_564_2	2.08778	0	0	0	0	0.425383	0	4.57533	0	0	4.80827	0	0	0	0	0	0	2.84413	5.27119	4.82277	0	3.40106	5.01025	0	0	3.29786	4.64215	0	0	0	3.47462	7.10747	0	4.15386	0	2.83437	3.70056	4.83606	3.0091	3.77957	2.97969	0	4.01011
2	45758	65758	Breast_SE_564_3	2.12424	0	0	0	0	0	0	4.25698	0.442385	0	4.8386	0	0	1.27109	2.65152	0	0	5.39858	2.71319	5.31024	0	2.40288	4.54803	0	0.849925	4.88863	4.25555	0	0	4.58394	4.44967	5.11225	0	3.68711	0	2.65991	2.80881	4.31887	2.0097	4.20157	3.26433	0	3.22657
2	1600934	1620934	Breast_SE_566_2	0	1.26034	2.0994	1.27274	0	4.78543	3.12493	3.76222	2.27523	0	0	0	0	5.47084	0	0	0	0	0	4.80752	2.64495	0	0	0	0	0	3.32188	2.39119	2.63594	0	2.83998	6.57382	0	0	0	1.24229	0	5.77982	1.61838	3.53338	0	3.18333	1.74358
2	1620934	1640934	Breast_SE_566_3	3.1426	4.0016	2.24238	3.61687	2.58073	5.94122	4.62716	5.54505	3.14589	3.15653	3.39901	0.611745	0	5.95409	0	0	0	0	5.96549	6.8961	5.09022	0.660634	0.916289	3.15744	2.05889	0	5.53203	2.11751	5.27762	0	4.51338	7.5718	3.4809	0	0	5.02468	0	7.40582	0	4.7167	0	0	5.04489
2	1720934	1740934	Breast_SE_566_8	4.57476	4.77513	4.38173	3.55468	1.69964	1.96722	0	3.94775	3.81389	3.55776	0	5.57017	0	0	0	0	5.55292	1.7354	3.30774	0.471281	4.85946	1.54714	0	6.2888	3.90856	0.507235	0	5.23437	6.72431	4.8635	5.11002	2.35564	5.11546	6.54414	0	0	0	0	3.71843	3.12524	4.30156	4.68948	0
2	1740934	1760934	Breast_SE_566_9	4.42128	5.10416	4.29864	5.26649	2.46226	4.23953	4.67979	4.61309	4.84818	3.74542	4.84161	5.35779	0	4.5898	0	0	5.02501	4.64974	0	5.19738	5.1482	2.43697	2.49576	6.35789	5.43543	4.11819	3.53988	6.75657	5.17904	4.58753	4.76088	5.83656	4.53594	5.31687	0	1.64243	0.694239	3.76742	0	2.88461	3.86891	3.0909	0
2	5688001	5708001	Breast_SE_569_1	3.13211	5.22334	3.21165	5.63747	5.92672	5.578	6.31557	0	4.87577	6.04161	0	5.74241	0	7.3167	0.0132547	7.23828	0	0	0	6.1626	0	0	0	1.32277	0	0	3.12454	4.30877	0	0	5.38747	0	5.70251	0	0	0	0	6.46	0	0	0	1.11774	4.01776
2	7760632	7780632	Breast_SE_572_1	2.32032	1.05611	2.84541	4.13121	0	0	0	3.60687	3.51297	5.70687	0	0	0	0	0	0.0366661	0	0	4.87002	0	0	1.90884	0	0	0	0	0	0	0	0	4.70371	0	7.69757	5.84078	0	0	2.30246	2.40775	3.34604	3.6513	4.34372	0	0
2	8529910	8549910	Breast_SE_573_5	5.50906	5.51969	5.12702	4.94247	5.79744	6.24462	6.07794	5.4057	5.14575	6.67149	2.61934	0	0	7.03267	3.60138	4.81428	3.43737	0	0	4.83671	2.38292	0	0	1.35	0	0	5.0532	3.9714	0	0	5.01529	4.66144	0	3.87474	5.26479	0.250374	0	6.07255	0	4.82833	2.01038	4.39685	3.52086
2	8569910	8589910	Breast_SE_573_7	4.51325	4.34479	3.75116	4.25054	5.13596	5.82853	5.19048	5.87559	4.1421	6.34739	5.49932	0	0	6.46119	4.31875	6.64224	0	0	0	6.36042	0	0	0	0	0	0	5.84582	0	0	0	4.36337	5.91398	0	0	0	3.66149	0	6.91564	0	5.64954	2.52091	1.97476	5.15369
2	9215206	9235206	Breast_SE_577_5	2.62423	0	2.8172	0	0	0.858763	0	0.404529	1.77669	0	0	1.89122	2.91806	0	2.59353	0	5.7168	0	2.92186	0	2.39473	3.1066	5.5319	4.55169	4.09954	2.44089	0	3.13354	6.14028	3.27758	3.81006	3.10582	0	4.47719	5.51102	0	3.06118	0	3.83962	1.53476	2.53654	4.42897	0
2	9235206	9255206	Breast_SE_577_6	3.37116	0.354869	3.06791	0.817617	1.59543	2.04651	0	2.06757	2.646	3.30389	3.69351	4.38577	4.77965	0	2.18872	0	5.84097	2.72589	6.14739	3.05647	4.13042	4.19886	6.45467	5.87302	5.28519	5.26503	0.264352	4.82366	6.70943	5.01437	5.15322	1.53843	1.16736	6.32156	6.42219	0	4.21102	0	4.23779	3.49332	3.17891	4.47352	0
2	9275206	9295206	Breast_SE_577_8	2.16817	0	1.40665	0	0	0	0	0	0	0	0	5.24614	4.24403	0	0	0	4.82862	0	4.49823	0	4.27812	2.93021	4.81402	4.76088	2.68997	3.07497	0	3.3086	5.65866	0	0.825939	2.89957	0	5.19733	4.57676	0	3.03614	0	3.58582	1.588	1.25007	3.08824	0
2	9367820	9387820	Breast_SE_578_1	3.40414	0	4.12003	1.98744	3.17766	2.04222	0	2.8302	3.51526	3.87629	3.20917	2.54954	3.93903	0	0	0	5.4337	0	4.39432	3.333	4.60543	1.37999	2.19224	3.45731	2.4473	0	0	3.00226	5.94266	4.8302	3.45598	0	0	5.44424	5.4022	0	1.70238	0	0	2.63305	0	3.77804	0
2	9928261	9948261	Breast_SE_581_1	3.37999	0	1.06675	4.33609	1.51911	0	2.18147	3.90544	2.62588	4.90682	4.71005	0	0	2.23061	1.10693	4.58277	0	0	5.97239	3.73321	0	1.59362	0	0	0	0	0	0	1.70393	0	5.00575	0	5.52826	5.61915	0	0	0	1.56051	0	2.83172	3.45921	0	3.56471
2	10265801	10285801	Breast_SE_583_2	4.30922	3.56315	3.59978	2.25961	1.57732	4.44068	3.46314	5.43355	2.24567	4.16349	4.35501	0	5.55321	2.55595	3.33816	3.04217	5.91311	0	1.51772	3.72446	4.21126	3.52626	4.63345	6.18025	4.4855	0	2.76821	5.13861	6.56187	5.69576	4.37988	3.37253	0	5.28392	6.48338	0	2.64973	3.48397	0	4.32561	2.78396	3.34385	1.79236
2	10753675	10773675	Breast_SE_586_3	2.79582	3.08197	3.495	2.03188	3.83597	5.33137	2.74664	4.94668	3.29253	5.44265	5.00667	0	0	6.58653	0	1.99631	0	0	1.95928	4.27942	0	0.505357	0	0	0	0	2.99601	0	0	0	4.45409	3.58132	2.14436	0	0	0	0	5.36718	0	0	1.78855	0	4.11322
2	11535398	11555398	Breast_SE_588_5	0	0	0	0	2.22858	0	0	2.8598	0	0	0	0	0	0	0	0	0	0	0	0	0	0	0	0	0	0	7.64133	0.700129	0	0	0	0	0	0	0	6.75019	0	6.3078	2.85377	4.79587	3.7443	2.06735	0.680639
2	17522718	17542718	Breast_SE_595_3	3.93711	4.15125	3.13413	4.57551	3.98528	0	0	3.92876	4.101	4.65266	0	0	0	1.06143	0	5.46332	0	0	5.74308	4.02314	0	2.59117	4.93311	3.81985	2.10547	4.83387	0	0	2.37282	0	1.366	0	5.81073	3.28575	4.12734	0	2.14162	0	1.75154	0	3.37852	0.622977	2.49191
2	20062033	20082033	Breast_SE_602_3	4.08856	5.80744	4.58415	6.58403	2.90778	3.62194	0	3.09413	5.32924	4.91037	2.48962	4.48776	2.17718	0	0	5.79755	4.94998	0	4.35415	0	4.46652	2.19701	2.95415	4.79878	0	4.47856	5.50187	5.84443	2.45836	0	3.42684	3.73538	6.01076	4.70471	2.69703	1.79227	1.79257	0	2.17139	2.72334	2.37195	4.49998	0
2	20102033	20122033	Breast_SE_602_5	3.80306	0	3.59295	6.47216	2.53782	4.95063	1.92902	5.84437	5.50637	5.67544	5.39264	0	0	5.64675	0	5.40696	0	0	5.19658	4.99697	0	1.51539	0	0	0	0	4.14586	0	0	0	5.99016	0.0793217	3.93734	1.60769	0	0	0.722188	4.84339	0	2.98456	3.63412	0	2.51084
2	20162033	20182033	Breast_SE_602_8	3.21945	0	3.56595	0.839375	2.62623	5.51889	0	5.28676	0	1.26056	0	0	0	7.00427	0.796135	5.92629	0	3.33542	4.29799	2.29598	0	4.44939	6.14197	0	5.14872	5.77929	1.97385	0	3.96511	0	4.97243	4.57492	0	0	5.72552	0	3.89256	4.81761	4.12964	3.00045	3.08693	2.07082	2.59795
2	20182033	20202033	Breast_SE_602_9	4.43983	3.28639	4.88202	4.83413	4.95713	6.28333	4.66133	7.56399	5.12691	6.03297	6.05855	0	0	7.42674	1.80176	7.47889	0	1.24329	6.09292	6.23171	0	3.36995	4.53991	2.71048	4.80205	4.06014	4.1163	0	6.29858	0	6.35613	5.00379	0	0	5.83739	0.639012	2.4143	6.31071	2.11898	5.38095	4.1575	2.21069	3.56968
2	20202033	20222033	Breast_SE_602_10	5.87694	3.94137	5.05086	6.32314	5.80006	6.85565	6.26785	7.33871	6.85874	6.41388	6.37682	0	0	6.77086	3.64275	7.54761	0.767445	3.896	6.03443	7.46599	3.98524	4.97295	7.37012	0.18379	6.38526	7.01085	4.68939	1.58505	0.718834	0	6.80676	4.06808	4.4365	0.376706	6.6073	0	4.06037	5.92933	5.30659	4.8146	4.942	3.35976	3.37095
2	20449588	20469588	Breast_SE_604_4	3.90075	2.0062	2.60287	4.29207	3.02987	4.96954	4.12322	5.14306	3.19564	4.9872	5.30015	0	0	6.49775	0	2.84303	0	0	5.29581	5.95783	3.76559	0.296676	0	0	0	0	6.16092	0	0	0	2.2045	6.6522	5.52949	3.21689	1.40927	4.88699	0	7.45684	3.913	4.68232	3.05358	2.98642	5.24647
2	20469588	20489588	Breast_SE_604_5	0	0	1.56134	2.60399	0.437638	4.2859	3.42964	5.02598	1.09604	2.16426	3.5291	0	0	6.35801	0.876058	0	0	0	1.43612	5.53959	2.28797	1.51497	0	0	0	0	4.67595	0	0	0	1.28293	6.10261	0.17617	0	1.46254	4.47301	0	7.22662	4.02562	4.15927	2.64108	3.34795	4.11328
2	20489588	20509588	Breast_SE_604_6	2.38336	1.14623	1.63246	2.72136	1.0783	3.06341	0.831791	3.63576	0.890984	4.0256	4.53424	0	0	5.28575	0	0	3.68349	0	4.10284	3.99971	4.24455	3.23449	1.68047	0.344375	0	2.34136	4.68869	0.660546	0	0	1.44318	4.17204	0	5.18239	4.70689	2.57818	1.67757	6.08988	4.05394	4.62446	3.11304	3.0612	3.03189
2	20569588	20589588	Breast_SE_604_10	4.88048	3.29257	4.57905	4.14547	4.03682	5.46412	4.07717	5.62868	4.05802	5.04283	3.7746	4.81487	6.66661	4.482	6.11388	1.11204	5.95594	0	3.30437	3.56686	5.48083	3.91972	5.60531	6.0992	4.7705	0	4.60827	5.61673	5.46597	2.84385	4.43737	2.99324	0.604047	5.28307	6.06316	0	2.69535	5.10194	5.24007	5.46498	3.87826	4.80463	0
2	20589588	20609588	Breast_SE_604_11	4.11263	3.05441	4.17227	2.87161	3.22082	4.16631	1.58799	4.27155	3.45615	2.45708	0	0.561359	4.30252	3.79549	4.64156	0	5.5552	0	0	0	4.47238	2.34048	4.79001	5.46958	4.49108	0	2.47494	4.31164	4.95141	0	0.742095	1.60656	3.87348	3.83539	5.85304	0	0.0125906	4.33747	4.01486	4.13246	1.98929	4.90624	0
2	20609588	20629588	Breast_SE_604_12	4.15869	3.83076	4.60381	4.59865	4.15425	5.32272	4.11424	5.08452	4.43241	5.15651	3.6131	3.45453	2.33304	6.43033	3.97431	1.99557	3.57943	0	1.19467	5.13226	4.90652	2.2166	0	4.94749	0.60364	0	4.51795	5.36967	4.21553	3.88148	4.64294	4.85287	2.34031	5.173	5.40779	0	0.386613	4.90575	4.10092	6.52185	3.76973	5.59271	2.83716
2	25249417	25269417	Breast_SE_610_4	3.27268	4.09987	3.99199	5.60318	4.56441	4.59653	5.20412	4.60257	4.34163	5.03585	3.60296	4.20308	3.71953	4.05307	4.17059	4.71085	0	0	0	3.63639	3.98267	1.80622	0	0	0	0	5.03586	0	2.67681	4.8835	5.13469	2.83005	0	0	0	0	0.201912	0	3.50092	2.72762	1.9155	3.73109	1.95878
2	26707307	26727307	Breast_SE_613_3	2.68383	0	0	0	3.72611	1.58475	1.44089	3.31932	0.242939	4.90444	6.96532	6.26365	3.21848	7.18996	0	1.98412	6.85205	0	6.074	3.4054	5.72509	2.32204	0.818569	4.71778	0	0	1.28419	3.39134	2.95068	3.52105	5.46361	1.12125	0.346711	6.40488	5.76225	0	1.46786	0.983953	3.95238	3.82496	3.23966	4.48258	1.16466
2	27795453	27815453	Breast_SE_618_7	4.72133	1.65985	3.50255	4.77246	1.11703	0.278446	0	0.683655	3.65313	4.31158	0.983297	6.22038	5.78171	0	3.22815	1.25439	5.43757	0	3.81109	0	6.07977	3.51427	4.06366	6.05885	3.32137	2.00113	0	4.9031	5.9379	3.66479	4.30207	0	2.87228	6.47744	5.84984	0	3.0902	0	3.87193	3.84694	1.91861	3.01582	0
2	27952888	27972888	Breast_SE_619_3	3.48556	3.16601	3.80106	0	1.00661	2.41837	0	2.42732	1.80915	0.849439	0	5.41336	0.916439	0	0	0	4.29063	0	4.29519	0	5.17	2.66558	4.03355	4.56219	0	1.63946	0	3.91263	5.27801	2.36956	0	0	0.780443	4.19145	4.25628	0	3.3753	0	1.46607	1.11153	0.53142	2.15423	0
2	28258557	28278557	Breast_SE_622_1	2.91774	2.0108	2.64752	1.14236	1.38429	2.17058	0	0	0	0	2.02969	5.14145	4.32439	0	1.57576	0	4.67721	0	5.14325	0	5.28274	2.19713	3.86768	4.78286	0	4.34256	2.33249	4.41607	4.86999	2.15992	0	0	0	4.39353	4.50787	0	2.79421	0	2.15239	2.45737	0	2.35317	0.870084
2	28338557	28358557	Breast_SE_622_5	3.8551	3.62021	4.20664	2.83645	3.82383	4.90749	3.94076	5.25393	2.98831	3.87925	0	3.10506	2.38507	0	3.87293	0	5.09147	0	0	0	4.78864	2.04851	0	6.23285	0	4.13013	4.23927	6.83752	3.81447	0.517253	2.44322	0	0	1.74246	5.79687	0	0.730068	0	1.68142	4.63251	0	4.69066	1.90695
2	28358557	28378557	Breast_SE_622_6	0.0578683	3.45222	2.58809	3.6899	3.09855	4.06537	3.94517	3.87972	2.56671	1.8633	0	0.996386	2.73336	0	2.49092	0	5.09974	2.78091	3.4547	0	2.80006	2.56736	4.50585	3.45692	0	5.65297	5.37821	4.19561	5.48398	0	1.63991	0	0	0	5.59721	0	2.15233	0	0.793763	5.15345	0	3.81424	2.72747
2	28418557	28438557	Breast_SE_622_9	4.3817	3.02776	3.56928	5.27449	4.21908	4.34543	3.83237	4.04213	3.04174	5.01028	5.55085	2.42427	0	5.31892	4.88398	4.33478	0	4.51183	4.57228	5.32682	4.21474	2.8102	4.41554	0	2.34656	4.99137	2.27354	0	0	0	5.22636	4.30606	5.12263	4.87449	2.82898	0	2.07834	5.03216	2.7733	4.02733	3.60191	2.73854	4.42489
2	28581649	28601649	Breast_SE_623_3	4.33319	3.10595	4.04818	4.21606	2.19072	3.13059	2.43952	3.06973	2.89481	3.94374	2.31507	4.26142	6.11473	0	1.36265	0	4.72755	0	3.78479	0	4.33796	3.22456	4.75848	4.78794	3.77133	2.54302	0	3.6907	5.56321	3.41681	3.03404	0	0	3.90248	5.22287	0	2.5042	0	3.40908	3.91978	3.42684	3.41421	0
2	28681649	28701649	Breast_SE_623_8	4.01761	3.51942	4.04819	5.36002	4.48553	3.31713	1.07736	3.47361	3.63549	5.62083	3.72835	0	0	0	3.17293	5.69078	0.993202	0	5.10686	4.48382	5.40105	1.71133	0	2.94641	0	0	3.05297	4.04235	3.10469	3.82154	4.91397	0	4.22856	5.73743	3.60894	1.65684	0	4.91056	4.31505	3.67581	4.5625	2.02204	2.50016
2	31366900	31386900	Breast_SE_630_2	4.39161	0	2.27231	3.94727	0	0	0	0	1.47828	4.66989	2.0946	3.49125	4.4722	0	0	2.94479	5.23094	0	3.6422	0	0	3.89207	5.62006	0	4.64655	2.04598	0	0	4.42825	0.033946	4.12074	0	4.55439	4.89734	5.19343	0	3.53861	0	4.44759	0.291934	4.42638	0	0
2	31386900	31406900	Breast_SE_630_3	2.48876	0	0	1.29526	0	0	0	0	0	3.71428	0	4.2138	4.44889	0	0	0	4.65028	0	3.75014	0	1.89966	4.13723	5.35568	0.492853	4.10479	0	0	1.99519	2.19036	0	3.85524	0	0.182719	2.84639	5.17141	0	3.90474	0	3.68601	0	2.5787	0	0
2	37764737	37784737	Breast_SE_637_3	3.86379	2.75413	3.02987	3.14843	0	2.15727	2.11307	3.77967	1.78265	2.29526	3.85656	4.29831	4.42867	0	0	0	4.63055	0	4.53474	4.97965	4.60145	3.16947	4.13032	6.23189	3.29699	0	0	5.29756	6.27056	0	3.28077	0	0	4.84852	4.44592	0	2.80324	2.58295	3.67205	3.0713	2.77889	3.03582	0
2	37784737	37804737	Breast_SE_637_4	0.495756	0	1.08418	0	0	2.58965	1.29912	1.10934	0	0	4.28029	5.16494	3.10984	0	0	0	3.1404	0	6.34682	4.73723	3.85249	2.58331	3.25304	4.91054	0	0	0	3.9057	3.6287	0	3.45886	2.931	0	5.09743	1.73681	0.717282	3.12709	3.18075	2.45283	1.99692	0.237797	0	0.695284
2	38169289	38189289	Breast_SE_638_11	4.62476	2.75816	4.9197	2.48695	3.18411	3.07846	0	3.2643	3.54513	4.13135	0	2.75185	0	0	3.39946	5.99856	2.82208	0	5.89174	0	3.54207	1.36377	0	4.87142	0	1.66476	0	4.73379	0	2.6527	3.55461	0	1.29697	5.32024	3.34627	0	1.67	0	2.09424	0.385059	1.61766	2.36916	0
2	38423779	38443779	Breast_SE_639_10	6.18692	0	3.9943	6.0989	2.67338	0	3.23691	0	3.87892	5.72876	0	0	0	0	6.15001	5.54224	0	0	5.61702	1.45713	0	1.48331	0	0	0	0	0	0	0	0	3.74044	1.98544	6.28853	4.83582	0	0	2.11937	0	4.54168	4.18339	5.33572	0	0
2	39540410	39560410	Breast_SE_643_8	0	0	0	0.73237	0	0	0	0	0	0	2.99523	0	3.9101	0	2.20441	0	0	0	6.84791	5.52217	0	0	3.09236	0	0	0	0	2.99482	3.66273	0	1.87159	0	0	5.19746	0	0	0.870426	0	1.05758	0	0	0	0
2	41917842	41937842	Breast_SE_644_6	1.38962	3.01797	1.73731	0	0.876315	2.22378	0	3.96018	1.28993	3.21045	3.59986	5.02647	0	0	0	0.910895	5.1743	0	5.50756	0.585641	4.96476	0	0	2.92042	0	0	0	3.16772	0	0	3.51568	0	0	5.4549	1.92437	0	0	0	2.19512	0	2.36817	3.5349	0
2	42543923	42563923	Breast_SE_647_3	0	0	0	0.488212	3.33175	2.5755	1.28516	4.22625	0	0.657366	4.24066	0	0	5.82895	2.68961	0.301619	0	0	3.43486	3.64116	1.51469	0	0	0	0	0	5.13409	0	0	0	4.24967	7.53597	0	2.71367	0	3.6513	0	6.10793	0	3.46927	0	0	5.4988
2	42924894	42944894	Breast_SE_649_6	5.09427	3.74333	4.89256	4.982	4.50143	4.5545	3.01059	4.7229	4.18003	5.4181	0.0555968	0	0	5.15858	7.89194	5.98494	4.46627	0	1.84113	3.74342	1.98999	4.07004	3.15735	4.68244	2.55212	2.0465	3.44461	5.55327	0	0	4.56647	3.60001	0	1.14934	4.08661	0	2.86931	3.27299	5.22017	3.15963	2.98355	4.66273	1.82561
2	42944894	42964894	Breast_SE_649_7	5.11032	3.64654	5.46587	3.3492	4.23072	4.72049	2.88799	5.1056	3.88318	4.45074	0	4.11099	0	0	6.81205	4.35643	6.48426	0	4.23489	0	3.29342	3.71726	2.98957	5.32783	4.61549	0	0	5.69475	3.02578	0	3.78801	0	0	6.5559	4.06365	0	2.82019	0	5.2054	0.862144	3.14632	4.72272	0
2	42964894	42984894	Breast_SE_649_8	4.59013	3.42819	4.35152	4.72159	3.42383	4.30639	3.14506	3.63461	2.74783	4.17793	0	4.39018	0	0	6.14818	4.90263	6.31085	0	2.65381	0	2.77579	4.02826	4.36704	5.8522	3.84056	0	2.23546	5.22694	1.113	0	4.43726	0.675259	0	5.66508	4.72089	0	3.18272	0	4.61122	3.35532	3.52303	4.34787	0
2	43024894	43044894	Breast_SE_649_11	5.64528	2.17631	4.72995	4.93348	3.9931	3.96605	3.02097	3.18092	2.60108	4.55898	4.83945	4.56865	4.95403	2.06137	6.49079	0	4.55978	3.95771	6.33568	0	5.32651	3.97061	6.03708	5.17755	6.52702	3.68394	2.0979	5.69905	2.85396	1.93302	6.28006	0.985891	4.72557	6.93234	5.97965	0	2.54741	0	5.01882	3.10115	4.54722	4.45543	0
2	43044894	43064894	Breast_SE_649_12	2.80051	1.54033	2.41541	3.61337	0.646828	2.62567	0.195337	0	1.72533	2.98648	0	2.36895	0	0	4.41053	0	3.24308	0	1.00766	0	3.44711	2.8427	5.11088	2.81781	5.4706	3.12981	0	5.12652	2.83169	0	4.30173	0	2.35262	5.39051	5.49471	0	3.12943	0	3.97375	0.387051	2.76034	3.26085	0
2	43064894	43084894	Breast_SE_649_13	5.74268	3.50348	4.99485	5.52929	4.18338	4.98948	3.58036	4.81105	4.34548	4.85094	5.576	5.9845	4.70098	0	4.06459	0	6.10273	4.61848	6.70788	0	5.71271	4.5881	6.60814	6.30764	6.26675	5.30914	4.05312	6.9021	5.19659	4.60524	6.8365	0.896253	2.72121	7.72867	7.10469	0	3.83298	0	5.50507	3.73583	4.61639	5.06268	0
2	43084894	43104894	Breast_SE_649_14	5.25009	3.49165	4.99822	5.47274	3.53819	4.24979	3.49354	4.0197	4.42959	4.53284	4.81781	5.01898	4.56664	0	4.11238	0	4.37388	2.98832	4.75856	0	4.90143	4.26508	5.89974	4.86781	5.13676	3.89293	0	5.15934	4.73052	4.26884	5.55564	0	2.38721	5.36925	5.5837	0	3.57521	0	4.74546	1.46164	4.58542	4.33187	0
2	43444894	43464894	Breast_SE_649_32	3.97478	2.23253	2.36207	0	0	4.08231	0	1.26007	1.75093	3.26361	0	0	0	0	2.88409	0	0.210617	0	4.92604	2.88536	2.95256	1.76743	0	0	0	0	6.46278	0	0	0	2.15697	5.37194	1.75653	4.56759	1.77363	3.30874	2.45702	5.52465	1.58462	2.75959	2.35809	2.22028	0
2	44926222	44946222	Breast_SE_652_3	4.99743	0	0	6.87008	0	5.29058	5.658	0	2.52269	0	3.42871	0	0	6.00507	6.31946	0	0	5.41136	0	0	1.96644	1.37914	0	0	0	0	0	2.00003	3.94829	0	5.27101	0	0.438646	0	0	3.45396	0.128506	0	0	0	0	2.7686	0
2	44995939	45015939	Breast_SE_653_1	0	4.574	1.91061	1.68866	3.19938	4.67379	4.02542	1.05559	2.79288	3.24668	1.44128	5.2509	3.93419	6.13023	3.74583	4.26618	5.71289	5.94664	0	4.33042	4.9994	1.44895	0	3.76331	1.68506	0	3.13281	6.45323	3.76382	4.35924	3.38778	0	0	3.88045	0	0	2.11352	0	0	0	0	2.28768	0
2	45159518	45179518	Breast_SE_654_1	0	4.27954	0	0.548922	3.63195	3.35522	2.44739	0	0	3.21392	0	4.19885	4.81317	5.40536	0	5.62506	7.2397	4.78191	0.428785	2.42312	2.37137	0	4.62733	4.28779	5.21657	4.26606	0	4.77407	4.41532	6.13317	3.69727	0	0	5.84594	5.68617	0	3.33627	4.80364	0	0	0	2.13019	2.63204
2	46070130	46090130	Breast_SE_656_4	3.47447	2.07078	3.25749	0	1.26116	1.96008	0	0	1.4746	0	0	5.58833	0	0	0.297747	0	6.34539	0	0	0	4.51814	0	0	1.79553	0	0	0	3.29354	5.6271	0	0	0	0	4.35326	4.65763	0	0	0	2.35445	0.948595	0.914925	2.05382	0
2	46321205	46341205	Breast_SE_657_4	5.26728	2.99583	4.98262	3.43062	4.58013	4.17887	3.72236	4.27922	3.8109	4.40401	0	3.8974	0	0	0	0	5.81802	0	2.44539	3.95955	5.53308	3.09609	4.85761	4.76738	2.27814	5.34411	0	2.63279	4.86999	0	4.21085	5.59597	3.84023	5.5548	5.13429	0	3.1826	2.69792	4.64538	3.78582	3.64187	4.41076	0.977417
2	46795836	46815836	Breast_SE_660_2	6.09931	4.0324	5.78857	5.3417	2.99535	4.24863	0	4.42477	4.56838	6.02292	3.30571	5.72889	4.40893	0	0	0	5.38061	0	5.75178	0	5.87321	4.23842	0	5.62635	0.779071	0	0	5.22619	4.39043	0	4.16879	0	5.82767	5.2437	4.63402	0	3.0655	0	4.59419	0.146161	4.5332	3.88754	0
2	46835836	46855836	Breast_SE_660_4	6.62101	4.68586	5.89527	5.61264	4.49718	5.42685	3.82174	5.97696	4.94855	6.71237	5.9758	6.19591	5.80564	2.58864	0	5.7435	7.28166	0	7.19263	3.95319	6.68872	4.37357	4.60306	6.48201	3.71381	4.05216	0	6.71871	4.70899	4.54168	5.50481	0	6.61425	7.09399	5.84162	0	3.35073	1.81517	4.72178	5.07848	5.16146	4.29546	0
2	46855836	46875836	Breast_SE_660_5	5.94491	4.37836	6.11693	5.08128	4.22346	5.13382	2.56698	5.66932	4.42843	5.82804	4.87912	6.11705	6.03128	0	0	2.63877	5.75572	0	4.72085	0	5.95413	3.45252	3.7793	6.12267	3.74835	1.51074	0	6.0243	4.71479	2.92376	4.49865	0	2.24598	6.44539	4.35358	0	2.65222	0	4.68331	4.1204	4.20903	4.40343	0
2	46875836	46895836	Breast_SE_660_6	4.59909	3.61324	4.74446	1.86877	2.81754	3.72909	0	3.35666	2.73282	3.5537	0	5.0876	4.37351	0	0	0	6.01535	0	0	0	3.96477	1.62444	0	5.39916	0	0	0	4.3303	2.02731	0	0	0	0	5.85508	4.24692	0	0.939887	0	3.29906	2.26368	2.17535	3.40052	0
2	47015836	47035836	Breast_SE_660_13	5.08949	4.52198	4.68358	4.55707	4.08632	4.42441	4.41036	4.97831	4.38096	5.50726	5.37211	3.92976	5.13043	1.74956	5.18743	3.09719	5.33923	0	5.11268	4.87258	6.16753	2.3941	3.8574	4.75252	3.80183	0	4.62605	5.77782	5.67586	2.71162	4.61356	5.83687	0	6.27584	5.98891	0	1.95888	4.09443	4.03668	5.38051	5.15716	4.92209	1.49729
2	47035836	47055836	Breast_SE_660_14	4.68543	3.90285	4.68959	5.06869	3.95446	4.33242	4.14107	4.42248	4.30259	4.69485	1.77043	4.7254	5.73301	0	4.07382	4.26826	5.95934	0	4.41183	3.66298	5.64658	2.80371	5.02913	4.86091	5.02096	0	1.53054	5.7306	6.40974	3.44892	3.36774	6.4155	0	5.16533	6.4458	0	2.23659	3.51851	1.88822	4.41808	3.57582	4.95966	1.16201
2	47055836	47075836	Breast_SE_660_15	5.98576	6.23724	6.1535	6.34643	5.36127	5.83545	5.62434	5.97311	6.05057	6.30275	4.71466	2.41306	6.42088	4.13137	5.8316	2.6369	5.89344	1.03368	3.03052	3.99776	6.17697	3.45652	3.72271	7.2875	4.61889	0	4.16726	7.12752	6.98782	4.9678	5.77295	7.4957	4.23146	6.00624	6.83057	2.44168	2.17627	5.5613	3.88127	3.67826	3.83568	5.56638	2.9031
2	47075836	47095836	Breast_SE_660_16	4.76916	3.16705	4.86748	5.1629	2.51571	3.17281	2.10035	3.54318	4.79029	3.93084	3.64734	0	6.20146	0	5.23406	0	3.49513	1.14715	3.92896	2.46403	4.83175	3.51426	1.54203	5.34825	3.92	0	2.4318	4.7271	5.71824	4.48757	5.0852	5.13266	4.85454	4.55515	5.51651	0	2.39482	0	3.78216	3.72384	3.94195	4.65309	0.698098
2	47332070	47352070	Breast_SE_662_5	4.57363	3.47936	2.42815	4.9947	3.34566	3.40644	2.83066	4.40091	3.40348	4.68943	4.06384	0	0	5.06527	5.8527	1.01595	2.08925	0	4.88807	4.25868	4.26984	1.3976	1.01002	0	0	0	5.20305	3.08354	2.51767	0	4.35151	5.94446	4.8157	4.44937	0	2.25929	0.654182	5.93671	2.86367	3.19966	3.74328	0.828104	4.03101
2	47352070	47372070	Breast_SE_662_6	3.98339	4.77294	1.6832	5.30025	4.57608	4.17822	4.32762	3.78181	4.57408	4.06862	4.53528	0	0	5.7776	6.55256	4.41706	3.03066	4.37328	0.675262	4.8619	4.43131	1.49867	2.6139	0	0	0.678493	5.8293	3.0298	3.60897	0	5.02157	6.02844	4.1089	4.45944	2.54955	3.17733	0.294171	5.30665	0	2.82289	2.57912	0	4.25561
2	54453658	54473658	Breast_SE_674_1	3.47014	2.11779	2.56414	5.04347	3.07356	3.55041	1.94391	1.59483	2.8185	0	0	3.50399	3.94587	0	0	0	4.23129	0	0	2.42779	4.72978	2.28501	0	4.81085	2.1217	2.29383	0	4.84219	4.53934	5.06179	0	0	5.04593	2.27903	3.96642	0	2.72132	0	2.87038	1.94522	2.27014	3.2345	0
2	55100880	55120880	Breast_SE_676_2	2.91543	2.85049	3.96763	0.634363	1.70359	2.55348	0.920584	3.44393	2.7196	1.91896	0	3.31533	5.39643	0	2.11806	0	4.1739	0	0	0	3.16755	0	0	5.21884	2.61708	0	0	4.71908	6.13641	3.87058	0	4.15028	0	1.22686	3.90367	0	0.981638	0.0147581	2.98724	2.28682	1.70154	2.7079	0
2	60539159	60559159	Breast_SE_679_5	5.39421	5.37735	3.59557	6.81214	5.56147	3.87575	4.87136	2.13995	5.65909	5.5299	1.54701	0	0	4.45421	5.50227	7.80285	0	5.70999	0	6.00614	0	3.69613	5.1518	0	3.68239	5.60393	0	0.322378	0	3.23599	4.99845	0	3.46723	1.39748	0	0	3.44186	0	1.80549	2.90748	4.20146	1.37422	0
2	62292041	62312041	Breast_SE_692_2	5.53518	4.08323	4.0388	6.36951	4.83616	6.08966	5.42534	6.13112	4.64165	6.54124	5.31937	0	0	6.2722	4.05029	5.70075	0.438754	0	5.86257	7.36037	5.08873	1.12933	0	2.6719	0	1.31405	5.76475	3.1615	3.71556	0	5.61985	5.5562	5.1372	5.64841	0	4.02847	0	6.62852	4.56682	5.70915	4.86071	2.78878	4.54853
2	65305769	65325769	Breast_SE_702_3	1.27522	0	1.43507	0	0	4.92281	3.77351	6.23146	0.684575	2.0595	0	1.52788	4.1638	5.8219	0	0	0	0	5.63661	5.17058	1.85262	2.72217	4.89408	2.17437	3.19632	2.80369	4.10896	0	4.16468	0	3.15727	5.9568	0	2.72373	3.31382	4.79034	2.50851	7.0781	3.32384	4.80608	0.0962168	3.60796	4.76564
2	70889992	70909992	Breast_SE_719_2	3.09594	2.84681	4.47624	6.22579	1.12565	0	1.79085	2.80747	3.27217	0	3.73824	3.51792	4.48329	3.21101	6.03243	4.22467	4.96039	2.331	0	0	4.32302	1.8195	0	4.50744	0	0	4.31198	4.33659	0.694962	4.58974	4.87397	4.77579	6.67096	4.39395	5.05688	2.24826	0.859852	4.78342	0	0	0.199619	0	1.32949
2	71730996	71750996	Breast_SE_722_3	3.18577	0.130646	2.14697	0	3.50825	4.27594	0	5.33057	1.84198	3.70694	5.94584	2.63666	2.57548	4.68603	0	2.62345	4.37476	0	6.28711	5.16951	3.96142	0	0	0	0	0	2.31065	4.39505	0	0	3.95081	5.60715	0.254746	5.10329	2.10088	0	0	6.07415	3.58857	3.09023	1.44601	3.50653	2.0913
2	71935207	71955207	Breast_SE_723_2	0	0	0	0	0	2.10424	0	0	0	0	4.48355	0	0	4.1437	0	0	0	0	7.21687	3.08168	3.40231	0	0	5.06272	0	0	0	1.94598	0	0	3.76206	5.82525	0	0	4.66937	1.33061	0	4.96028	0.94585	3.58747	0.767422	3.96133	3.37465
2	74202471	74222471	Breast_SE_728_3	0.5937	2.40061	0.169193	2.52847	2.74124	4.28588	2.7811	4.1454	1.8004	2.25765	5.15763	0	0	4.67613	0	0	0	0	5.62737	5.34599	4.97786	0	1.00288	0	0	0	2.95795	0	0	0.563243	4.19816	4.17152	2.93732	3.75263	1.63855	4.88436	0	6.37262	2.02999	3.91425	0	0.738703	5.46834
2	74484957	74504957	Breast_SE_729_7	4.71018	3.42128	4.29817	4.86974	3.35731	5.0863	4.55205	5.14607	4.94527	5.88949	3.72145	4.75403	6.25146	0	5.29761	0	0	3.99337	0	4.46912	5.30567	1.9797	0.123874	0	3.24243	0	4.24934	4.16508	5.59793	5.48291	4.34984	0	0	5.34016	2.82098	0	1.33097	0	0	3.42384	0	2.68513	3.20264
2	74847238	74867238	Breast_SE_731_3	4.34362	3.3286	3.15694	5.30005	3.56714	5.72897	4.34796	5.4347	4.73094	4.17893	4.42152	3.42666	5.05774	3.78746	1.78668	2.36195	0.929771	0	5.57658	5.51788	2.89531	3.43124	4.43456	0	0	0	3.08115	0	5.29589	0	5.64049	6.44142	6.33235	5.22694	3.79146	0	3.08116	6.38191	3.80179	5.19223	4.34081	0	3.84917
2	75592971	75612971	Breast_SE_732_3	3.90263	3.67501	2.56634	3.48039	1.9218	3.61471	0	2.69048	0.18439	4.11228	4.9836	6.25401	5.43422	5.10948	5.6815	0	4.4256	0	5.34836	4.95638	4.24655	3.7758	5.56816	5.39504	3.06404	1.84302	0	5.84844	0.100112	1.93585	5.26976	1.89142	3.85978	4.37364	4.90345	0	3.84915	5.61426	3.76665	2.75024	3.61255	3.23529	2.93574
2	85250720	85270720	Breast_SE_735_7	4.19282	0	3.58138	4.43335	2.81682	4.8328	2.90377	2.41586	2.82026	5.59825	0.77949	0	0	3.86565	6.85142	4.44081	0	0	5.34836	1.15562	5.66636	2.91205	0.435342	1.45926	0	0	3.87136	4.49628	0	0	5.68263	2.2122	4.61372	3.65767	0	3.48114	1.59621	0	4.9166	3.14848	4.4361	4.37124	0.78481
2	85270720	85290720	Breast_SE_735_8	4.07793	0.421559	2.87628	3.17102	1.20765	2.53355	1.25069	0	3.20036	5.867	1.5869	0	0	0	4.39477	0	3.85388	0	5.01476	0	4.85143	3.35207	4.18394	2.21646	0	2.66289	0	1.93888	0	0	5.0922	0	5.86301	4.52324	0.352596	0	2.5872	0	3.77827	0	3.24383	3.77268	0
2	85495779	85515779	Breast_SE_736_10	3.44284	3.41649	3.19526	1.58198	3.69238	3.24304	1.86256	5.10683	2.30811	2.44722	1.85964	6.28732	3.18334	5.19267	1.35411	0	3.83933	0	6.07223	4.80638	3.83441	1.98039	4.63546	3.62988	0.700796	1.36552	0	3.51454	4.3284	0	3.31271	3.73366	0	4.61755	5.04261	0	1.95373	4.59495	3.02222	2.83268	1.63905	3.46153	3.41845
2	85741731	85761731	Breast_SE_737_6	1.62943	1.07607	1.85292	0.272869	2.19313	3.18536	2.85677	4.54156	2.95358	0	2.75794	5.94567	3.01684	3.25986	0.958612	0	4.30068	1.44525	4.91206	6.09287	5.71599	0.925548	0	6.30252	0	0	3.15543	6.36706	2.51052	0	1.05939	4.79901	0	1.70366	7.14541	0	0.755494	4.43874	4.41353	3.08761	2.07151	4.00795	0.96576
2	85761731	85781731	Breast_SE_737_7	0	0	0.658996	0	2.3615	2.27968	2.01552	1.89987	2.03129	0	3.46806	5.79988	4.8894	2.40387	2.66771	1.75022	5.54801	1.59533	2.87871	5.71683	6.35695	0.179101	0	5.29751	0	1.58272	2.47	6.13678	0	0	4.47258	3.63617	0	2.57382	6.6389	0	0	1.9181	1.96972	1.69544	0	2.38096	0.541324
2	85781731	85801731	Breast_SE_737_8	0	0	0.160896	0	0	0	0	3.80889	0	0	0	3.96816	3.37154	0	0	0	5.12689	0	0	1.86862	5.04096	0.179356	0	4.15927	0	0	0	5.32131	0	0	0	3.81215	0	0	5.42809	0	0	0	2.40088	0	0	1.11692	0
2	85905521	85925521	Breast_SE_738_4	1.89812	1.23112	2.48033	0	0	2.87122	0	4.8149	0	0	2.73473	0	0	5.12975	0	0	5.27424	0	6.37051	4.21727	0	2.45431	4.09329	2.98686	0	0	0	3.76375	0	0.957235	3.07997	4.48129	0	0	2.75499	0	2.3497	5.95626	3.86119	1.56241	2.27318	3.41661	4.3484
2	85945521	85965521	Breast_SE_738_6	0	0	0	0	0	4.10632	0	4.8676	0	0	0	0	0	5.809	0	0	0	0	6.41947	5.45219	0	0	1.49606	0	0	0	5.28061	1.56375	2.45825	0	0	5.46669	0	0	0	0	0	5.42622	0	3.74101	1.45889	0.616695	5.47052
2	95255953	95275953	Breast_SE_742_1	4.31941	0	3.19725	4.29872	3.0116	2.52002	3.87371	2.62312	0	4.26948	5.81926	0	0	5.87796	0	4.49254	0	2.29553	5.44012	5.63432	4.48672	3.33386	5.72958	0	2.10395	4.19692	5.24343	0	0	0	4.79907	5.48941	3.20266	5.45092	0	3.12904	2.79448	5.94139	4.19814	3.1876	1.98129	0	3.98527
2	95315953	95335953	Breast_SE_742_4	0	0	1.37149	3.2021	2.44615	1.26965	0.109229	0	1.46279	4.20696	2.33703	0	6.00373	4.14806	0	0	4.97581	0	0	0	4.57917	2.56712	0.075269	0	5.04389	3.52808	0	4.25324	4.87049	0	5.81165	1.45531	0	6.22678	3.95058	0	0.975389	2.06579	0	2.20542	2.25985	2.15342	0.781692
2	96128585	96148585	Breast_SE_744_1	4.38936	4.74971	4.00796	5.55345	4.68939	6.10581	5.96259	5.0982	4.14672	3.37845	0	0	3.28369	4.8417	0	5.30563	4.23451	0.725557	0	3.29816	4.10338	2.91164	3.27391	2.97732	0	0	4.86679	0	0	0	4.25869	6.56508	0	3.45173	4.83174	0.940548	1.84505	3.53633	0	0	0	2.64539	2.72231
2	96767234	96787234	Breast_SE_748_3	2.07161	0.894405	1.52621	4.09493	0.516202	3.4716	3.3742	0.383133	0.608504	4.13497	5.27507	0	0	4.98593	1.13523	3.84625	0	0.621299	2.98361	4.87531	3.47803	0.900725	0	0	0	0	4.86118	0	0	0	5.49051	3.59416	0	4.16806	1.56135	3.04221	0.0811879	5.58627	0	3.92169	3.22025	0	3.6557
2	96887234	96907234	Breast_SE_748_9	5.42548	2.83559	5.20896	4.48745	5.54383	5.36539	3.58619	4.26225	2.72948	5.56296	5.86498	0	0	7.22104	1.74128	2.46854	4.79232	0	5.22207	5.92759	4.35594	3.20463	1.70138	0	0	0	7.15387	3.27875	0	0	5.27587	5.99152	3.48888	5.19745	0	2.78348	1.0052	6.24814	0	4.35483	2.31043	3.15706	4.64111
2	98757840	98777840	Breast_SE_751_5	4.67247	4.62673	4.97618	3.7192	4.38335	5.81915	4.72875	4.9744	3.62884	4.36323	3.04812	1.29158	0	0	0	6.34488	4.56011	0	6.32705	5.52482	2.86495	1.72535	0	0	0	0	0	5.28662	0	0	5.18166	0	0	6.25911	0	0	0.676629	2.38333	3.97281	4.58935	4.18251	1.57804	0
2	98797840	98817840	Breast_SE_751_7	2.75606	2.80306	2.12066	1.36255	2.92544	3.61079	2.59522	3.67384	0	4.10925	3.69807	4.9594	0	0	0	4.59152	4.02354	0	5.41616	4.02081	4.09514	2.00332	1.30087	0	0	0	1.59515	5.00853	0	0	3.88255	0	1.39674	4.64393	0	0	1.05586	1.68847	3.19583	3.46755	3.01155	0	0.274968
2	100779823	100799823	Breast_SE_757_4	2.63601	1.37206	3.88373	4.75357	0	0	0	0	3.12859	5.3958	0	0	0	0	0	0	3.88073	0	5.07313	0	0	4.03116	4.47357	0	1.30611	0	0	1.33864	5.28275	0	4.35588	0	5.79312	4.6356	0	0	3.63807	0	3.95359	3.26523	4.30129	0.180623	0
2	101458780	101478780	Breast_SE_760_5	3.18728	2.65358	3.93575	1.79583	2.56332	1.1742	0.510565	3.20345	0	0	0	4.46865	0	0	0	0	6.60938	0	0	0	0	0.950474	0	5.47708	1.06696	0	0	4.1287	4.38857	0	0	0	0	3.44891	5.17383	0	2.19091	0	3.28431	0	1.24051	3.80567	0
2	102048010	102068010	Breast_SE_763_6	4.67216	4.26482	4.10105	2.74018	3.48183	4.84898	2.53366	5.06332	3.93309	4.38375	5.15266	6.4014	0	0	2.73672	2.69061	5.66802	0	5.16944	4.58493	3.96846	1.39839	3.09105	4.94256	1.19821	2.93895	0	3.49633	1.35597	0	0	1.86882	0	3.42752	5.6616	0	0.719659	0	4.12393	3.98834	3.57974	4.25992	4.29176
2	105370900	105390900	Breast_SE_765_6	2.30712	2.62511	3.35739	0	1.41735	0.845672	0	3.36246	2.76574	3.81981	5.81455	3.0325	4.00967	0	0	0	0	0	4.68821	4.4475	4.82329	2.55208	4.18382	4.1114	0	0	0	0	4.59061	0	5.02931	4.39289	0	2.07512	0	3.38137	2.27904	1.41261	3.40349	1.26379	1.61116	3.00867	0.346659
2	109691333	109711333	Breast_SE_771_6	2.90637	2.13031	3.2867	2.91401	2.90021	2.83574	0	4.00664	2.00448	4.62812	3.85766	0	0	3.85084	0	0	0	0	5.76075	5.05639	0.274761	3.59272	4.22722	0	0	3.82823	1.84578	0	0	0	5.13892	0	0.839269	5.39498	0	0	2.88555	5.63501	3.62613	4.74042	4.3366	0.963251	3.59707
2	110086457	110106457	Breast_SE_772_1	5.32068	3.87897	4.39645	5.48241	2.42701	4.55638	3.72879	4.2724	3.95692	6.32969	6.52437	6.39825	6.56433	3.72773	3.98452	0.861675	4.79352	3.47229	6.80655	6.75458	5.57266	3.67432	6.17375	6.03319	5.58147	4.1476	2.66462	5.54404	6.77769	4.73154	6.31213	3.93873	7.06019	6.06948	6.43313	0	3.11894	0	4.15894	4.70293	5.10721	3.62917	0
2	110106457	110126457	Breast_SE_772_2	4.19707	1.76027	2.45758	4.87758	0.91567	1.61911	0.225549	2.40449	2.2929	4.36199	3.8819	4.39553	5.10687	1.69969	0	0	0	2.61736	5.65106	5.69452	3.46863	2.52805	4.18808	2.10619	0	0	0.959303	1.86474	4.68229	0	4.71631	3.80428	5.8526	3.669	4.03215	0	2.44026	0	0.953825	2.56522	3.52281	1.38987	0
2	111695899	111715899	Breast_SE_775_5	4.87637	4.26704	4.16109	5.33769	4.22946	4.16826	2.87976	5.26111	5.34455	5.87547	4.55574	3.97319	0	2.18631	3.43064	0	3.6287	0	5.46363	4.5517	4.19667	1.92076	1.49488	0	0	0.562357	5.27028	3.90445	5.58467	2.05175	5.58032	2.25973	5.85878	4.84691	3.4752	0	1.37475	3.40334	3.57277	4.32729	4.84279	2.76145	2.09599
2	112610496	112630496	Breast_SE_780_2	3.57341	2.20022	3.67957	0.542146	1.87869	2.92675	1.77815	2.36263	2.19016	1.45448	1.15223	5.56185	3.05527	0	0	0	3.88367	0.337042	4.01842	0	2.87178	3.44394	5.68391	4.904	3.82368	4.12106	0	2.48701	5.94115	1.12852	2.11478	0	0	5.69859	5.68965	0	3.16766	0	2.88527	0.968202	0	2.11496	0
2	112790496	112810496	Breast_SE_780_11	0	0.132387	0	0	0	0	0	0	0	0	0	0	0	0	0	0	0	1.79996	3.70555	0	0	2.5596	5.30456	0	2.92693	4.79134	0	0	5.12037	3.54711	0	0	0	4.34002	4.9547	0	3.80509	0	2.9213	0	0.937887	0	0
2	112810496	112830496	Breast_SE_780_12	0	0	0	0	0	0	0	0	0	0	0	0	0	0	0.0125513	0	0	2.14785	3.78877	0	0	1.78052	4.75828	3.28139	2.65765	4.74934	0	0	5.29517	4.9577	0	0	0	4.68167	5.0226	1.78688	3.23744	0	3.8034	0	0	2.80418	0
2	112864379	112884379	Breast_SE_781_1	0	0.230005	0	0	0	0	0	0	0	0	0	4.28007	0	0	0	0	4.2355	0	1.93279	0	0	3.41412	6.3321	5.03955	4.14506	4.22629	0	0	5.83206	4.38644	0	0	0	4.9621	5.10053	0	4.06327	0	2.68511	0	1.25192	1.12141	0
2	113155712	113175712	Breast_SE_782_9	3.90869	4.14001	2.65295	4.52688	4.36206	5.84061	5.19164	5.34408	3.87695	3.79594	4.39293	0	1.3997	4.7522	0	3.41468	0	3.64318	4.46199	5.04211	3.55089	2.18672	4.21666	0	0	0.596398	4.59028	0	0	0	4.41379	5.06948	2.5162	2.9264	0	2.98475	2.33219	6.07512	0.887445	5.38858	3.23543	0	4.45929
2	113235712	113255712	Breast_SE_782_13	5.07746	4.02545	3.89285	3.37554	3.69693	3.98035	4.84359	4.81391	3.17352	4.85657	4.7527	6.64122	6.91567	0	4.38261	0	3.89567	4.5012	2.11072	3.60785	4.19486	3.40972	5.85509	4.10401	4.77752	4.50637	4.20174	0.323076	5.84992	6.54442	3.23552	0	0	5.92332	5.7298	0	3.59272	2.06714	3.25779	4.40527	3.16316	3.36225	0
2	113275712	113295712	Breast_SE_782_15	4.89794	2.76667	2.46806	3.73054	3.58906	3.64	1.98944	1.79239	2.38998	5.56604	4.85965	4.66364	5.69637	3.8992	6.74523	0	3.27008	1.8536	6.68085	4.32569	4.33533	2.9834	4.90347	4.84442	3.43242	3.21056	0	1.44706	4.19333	0	5.99063	0.456004	4.46701	6.25954	4.98483	0	2.94461	3.20193	3.47095	3.43613	4.07297	0.466011	1.12245
2	118824410	118844410	Breast_SE_786_8	7.02676	7.41385	6.08507	7.43899	7.71524	0	3.42111	2.19254	7.03207	0	0	6.27701	0	0	0	0	7.39867	3.97856	0	0	7.58915	0	0	3.65101	0	0	0	4.73639	0	4.6035	5.34397	0	8.59761	7.34998	2.25195	0	0	0	0	0	0	2.23546	0
2	118844410	118864410	Breast_SE_786_9	5.72309	7.11604	5.93608	7.70209	7.37545	1.47507	4.03165	3.91743	6.64755	0.106215	2.07816	6.49922	0	0	0	0	6.25167	4.83903	0	3.96884	7.44765	0	0	5.70781	0	0	0	5.81577	0	3.08563	3.82857	0	7.75357	6.52784	6.08831	0	1.14833	0	0	0	0	1.7994	0
2	120334347	120354347	Breast_SE_792_1	1.65531	0	2.59049	3.11816	1.51785	2.72572	5.63956	6.10769	0	4.73862	6.62274	0	0	4.89363	0	0	0	3.32235	2.43365	6.20102	0	1.34348	0	3.19307	0	0	5.48289	1.44685	3.12299	0	5.90806	6.07669	0.297579	0	0	4.35024	0.602165	6.48375	0	5.24382	3.10209	0	5.10932
2	120394347	120414347	Breast_SE_792_4	0	0	2.04448	0	0	1.92067	3.7561	4.86644	0	5.19837	7.07555	0	0	3.87519	0	0	0	2.25977	5.62115	6.00836	0	0	0	4.51281	0	0	4.82123	0	4.49045	0	6.14223	6.54844	4.24175	5.46658	0	3.50208	0	6.48365	0	5.24595	3.64157	0.647589	3.2487
2	120456444	120476444	Breast_SE_793_1	2.5488	0	2.48408	0	0	2.81672	2.30833	5.97827	0	3.64063	4.30997	0	0	4.84467	0	0	0	0	5.58169	5.45429	0.77058	2.85555	4.10884	3.4114	0	4.19835	1.68832	1.00772	0	0	4.47247	4.58809	2.94778	3.98008	2.18391	1.37329	2.24928	5.66384	3.23574	5.61624	4.9436	3.50933	1.60983
2	120925419	120945419	Breast_SE_795_2	3.74814	2.27092	4.05971	0	2.46494	3.87977	0.559332	4.53995	1.94328	3.23284	0	0	0	0	3.72865	0	0	0	0	0	2.70014	2.5674	3.85702	5.35443	2.81942	0	0	4.74373	5.63322	0	0	6.12079	0	0	4.88177	0	1.64512	0	0	0	0	4.09467	0
2	121167519	121187519	Breast_SE_796_3	3.87644	3.62636	3.34027	3.65081	4.49359	0	0	0	3.11727	4.4189	0	0	0	0	0	0	0	0	3.25882	1.02733	0	4.33985	5.82697	0	0	3.97297	0	0	0	0	3.67324	0	7.26705	3.53199	0	0	3.2979	0	3.1539	2.61594	3.73793	0	0
2	121187519	121207519	Breast_SE_796_4	4.13272	3.56944	3.97874	4.26863	5.00588	0	0	1.94721	3.26951	5.69067	0	0	0	0	3.0846	0	0	0	0.157648	3.37005	0	4.23594	5.02025	0	3.37223	5.75828	0	0	1.28278	0	5.19811	0	6.65283	4.48254	3.01192	0	2.74966	0	1.75856	4.03518	4.57281	0	1.00476
2	127061284	127081284	Breast_SE_799_2	3.78783	3.93887	3.71135	3.61918	4.72003	5.97787	4.69432	5.85697	3.52445	4.29029	5.35883	5.64724	5.30633	4.1178	5.61726	0.610581	6.76103	2.99948	0.433761	5.53132	6.19677	2.25574	4.14541	4.63551	4.59821	3.37066	2.93432	4.68899	5.04701	5.9318	3.76765	2.04444	0	3.46379	6.55384	0	1.86245	0	0	3.69011	0.850901	5.46904	1.12387
2	127081284	127101284	Breast_SE_799_3	3.49707	3.70671	3.69037	3.14065	4.65658	6.07935	4.83708	5.32716	3.54138	4.6271	6.25065	2.69631	0	3.80669	5.45804	2.79307	4.8444	1.16893	3.42052	6.27343	5.78481	2.15568	0	2.55672	0	3.29303	2.44019	3.42534	3.56028	6.25506	1.6748	0	3.68487	0.0326496	5.30235	0	0.688215	0	0	1.91418	2.23742	5.32184	0.288359
2	127101284	127121284	Breast_SE_799_4	2.08214	2.34057	3.09181	4.01469	3.06888	5.64634	3.99625	4.57041	2.35992	3.21763	5.07849	4.83351	2.73093	3.25017	5.97579	0	4.54088	4.1831	0	4.99164	4.84558	2.35831	3.81711	4.69122	4.31656	3.67356	0.0353383	4.93846	4.43244	6.13982	1.28765	0	1.51384	4.19916	5.28521	0	2.54298	0	0	3.46009	0	4.26793	0
2	127205035	127225035	Breast_SE_800_1	3.71706	3.86442	3.97891	5.20541	0	2.33712	2.61064	3.47757	2.80222	2.81344	3.8621	5.99635	2.59689	0	0	0.536816	5.30807	5.11489	3.43117	0.424978	2.01567	1.98018	5.9144	2.98741	5.27699	4.73375	0	5.04849	0	0	3.4315	0	5.55616	5.23188	0	0	3.0379	0	0	2.79765	2.9794	2.41686	0
2	127629337	127649337	Breast_SE_802_4	3.35133	2.79607	4.7393	4.13953	3.63905	5.05089	4.50215	3.83908	3.83958	3.53515	2.69884	4.2033	4.67974	0	4.30142	1.54008	3.8443	4.67124	1.91434	0	4.24684	2.33093	1.53131	5.98913	4.91214	0	2.10631	5.91353	6.11366	4.42116	5.2211	2.20154	0	5.77372	5.46705	0	1.74373	0	3.74008	0	0	4.347	0.140743
2	128357091	128377091	Breast_SE_803_6	1.93264	0.998736	3.80472	3.10959	0.464862	1.34112	0	3.00374	4.09769	2.4763	0	1.14064	2.796	2.63686	7.90322	2.35886	0	3.53289	1.59778	3.65291	3.58119	3.9227	2.73494	4.86159	0	0	0	6.57716	0	0	4.63549	0	0	0	0	0	2.4907	0	3.87401	0	0	3.33418	0.414714
2	129040527	129060527	Breast_SE_804_1	2.58056	0	2.00648	0.913828	3.18021	3.81239	2.56742	4.64555	2.66279	4.53359	0	0	0	4.42254	0	2.79531	0	0	6.1599	5.22198	0	2.74978	3.58304	0	0	4.39291	1.71355	0	0	0	2.92597	4.7664	0	0	0	2.0353	2.22289	6.09013	1.89507	1.73613	1.95651	0	4.28137
2	130798193	130818193	Breast_SE_805_2	0.530997	0	1.41406	0	0	0	0	0	1.32672	3.89164	0	0	0	0	0	2.23568	3.9741	0	6.36172	0	0	2.9659	4.78664	0	1.97027	4.90006	0	3.0791	2.51293	0	4.44768	0	0	5.22127	3.92086	0	2.06889	0	0	2.53651	0	0	0.816621
2	130818193	130838193	Breast_SE_805_3	2.59142	1.42187	3.18259	0	3.36273	3.24505	2.98246	0	0.626657	5.3667	0	0	3.25423	0.0793496	0	3.03984	6.27344	4.57375	1.90666	0	3.14998	3.69948	6.04418	0	4.31098	5.72322	1.52738	5.30586	6.15453	6.06995	6.09311	0	0	7.34052	6.34313	0	3.27917	0	0	3.95332	2.63843	2.94554	1.73202
2	142849402	142869402	Breast_SE_814_1	2.33581	2.9569	2.79735	2.57517	0	2.08425	2.00503	5.21252	0.407058	2.11561	0	3.69739	0	0	0	0	4.38259	1.72091	5.63333	4.52635	2.27884	2.5044	3.74072	0	0	3.81512	5.41019	3.26355	4.28708	0	5.19854	3.26684	0	5.95978	3.8766	4.79214	2.57527	5.31015	2.68583	2.18611	2.92463	0.443293	3.67638
2	142869402	142889402	Breast_SE_814_2	2.84731	3.73609	2.28044	1.6509	0	2.82757	0.621526	4.39469	0	3.04388	1.96722	4.87076	0	0	0	0	4.5715	0	6.15857	4.26105	2.71151	2.7014	3.39435	0	0	4.1606	5.9051	1.84769	4.90275	2.35224	4.34474	2.65935	1.35103	6.62134	3.18936	5.18957	3.08812	4.85198	0	0	0	0	3.98816
2	144500511	144520511	Breast_SE_816_7	5.2904	5.67344	5.69557	4.54309	4.85132	5.27223	5.13792	4.99715	5.06399	4.36087	0	5.00126	4.39799	0	0	0	5.00986	0	0	0	0	0	0	5.11366	3.652	4.09518	0	5.21664	2.52589	5.44688	0	0	0	3.28688	5.13284	0	0	0	1.00843	1.02911	1.75156	4.42375	0
2	150461918	150481918	Breast_SE_823_2	3.24286	5.21694	3.17609	2.67849	0.70325	2.76925	1.65902	0	3.49361	4.30947	3.43269	5.01312	1.94487	0	0	0	2.1563	0	6.5456	3.92504	4.41856	2.03841	3.09379	0	0	3.66912	0	0	4.991	0	4.57858	0.0862391	3.41739	5.58644	2.10078	0	2.89594	0	1.60179	2.042	2.63862	1.87756	0
2	158709675	158729675	Breast_SE_831_1	4.84789	0	3.16326	4.93133	3.10625	5.51333	3.71879	5.377	2.75266	6.03342	4.18921	0	0	5.27651	0	2.32369	0	0	5.59389	6.4066	0	1.80651	0	0	0	0	5.19539	0	4.79633	0	4.89336	6.23547	4.60964	0	0	1.75331	0	6.75946	4.34871	5.487	4.87168	1.89887	5.07509
2	159084044	159104044	Breast_SE_834_4	4.42589	2.68506	4.19609	1.49171	2.18406	3.14991	2.13132	4.95628	3.71882	3.73898	2.39429	0	0	0	3.9961	0	2.88777	0	5.54123	4.59491	3.68407	2.0711	3.35624	3.53292	0	0.772781	0	0	4.59631	0	3.98115	5.56917	3.29354	4.45964	0.529462	0	2.15833	5.624	4.08557	3.80725	3.57707	3.73491	0
2	160202315	160222315	Breast_SE_837_5	5.09333	3.90006	3.82255	3.13361	3.24191	6.48117	4.05806	5.95764	2.4867	5.1541	5.6131	5.8912	4.78393	0	6.30836	1.7385	6.81701	1.68285	7.63161	5.56048	5.6528	4.64647	6.46187	5.17685	4.30027	5.26907	5.73059	0.0566223	6.44408	3.78795	5.30242	5.76278	3.08682	6.97379	5.79195	0	4.53709	5.92053	4.00492	4.82203	4.46922	3.0883	3.37563
2	160222315	160242315	Breast_SE_837_6	5.24767	3.88261	3.71436	2.7979	3.58673	6.88477	4.35931	6.37533	2.76989	5.78236	6.57159	5.04619	3.59404	1.87927	5.88886	3.64675	6.41273	0	8.85535	6.29161	5.33505	4.51356	6.27564	4.97592	2.62478	5.405	6.40936	0	4.75396	3.50793	5.90748	6.33624	4.91037	7.16566	5.31401	0	4.77336	6.46531	4.05548	4.51066	4.30187	2.47223	5.24736
2	160242315	160262315	Breast_SE_837_7	2.77305	1.74779	0.172659	0.832472	2.07792	3.87128	0	3.73601	0	2.23849	5.15462	2.58161	0	0	5.70471	0	2.7804	0	6.7933	5.09074	4.36844	1.27153	2.02001	0	0	0	3.76511	0	0	0	4.32854	3.05595	0	5.2494	1.54378	0	2.82691	4.64225	2.32499	2.49471	2.24641	1.94445	4.81225
2	160262315	160282315	Breast_SE_837_8	3.82888	3.66788	3.31215	3.37283	4.12314	4.08631	3.5825	3.1266	3.54826	3.75756	0	4.6875	5.11906	0	5.98898	3.01916	0	0	2.89244	3.65204	4.98462	1.21303	2.30164	2.69526	0	0	3.98131	0	5.76669	1.76562	3.69355	0	0	5.35626	0.353912	0	2.48531	2.57213	3.4828	3.40578	3.24319	2.8512	0
2	161120733	161140733	Breast_SE_839_1	4.5719	3.19121	3.79096	3.76578	2.55607	3.27036	0.490481	2.3638	3.23561	4.64094	3.17539	3.22765	0	0	0	3.5982	2.08056	0	7.18112	4.98331	5.16444	2.18723	2.3012	0	0	0	4.9994	3.34453	2.83977	0	4.98752	3.64498	4.20639	5.36443	1.93922	3.42844	2.07974	3.74563	2.8716	1.71191	3.24748	1.3995	5.09089
2	164512186	164532186	Breast_SE_844_2	3.01828	4.52499	1.7754	3.43152	4.47984	3.36628	0	1.98149	3.50911	4.53755	0	0	0	3.51271	0	3.77268	0	0	4.78829	4.46983	2.06452	0	0	0	0	0	5.11482	0	0	0	3.83738	3.87462	3.87385	4.39269	0	4.58968	0	5.51202	0	2.45584	2.26935	0	4.17956
2	165789660	165809660	Breast_SE_846_1	4.83717	4.50159	3.3107	5.03065	5.11966	4.96454	5.01205	5.02456	4.5451	5.23359	5.38488	0	2.90878	5.81267	0	5.12681	1.47419	3.7155	5.20753	5.70939	4.02592	3.05773	5.379	4.24566	3.77431	4.85291	5.28714	0	5.34584	0	4.89351	4.99755	6.35617	5.99749	0	2.22566	3.09988	5.44774	2.98219	4.24934	3.82626	2.32768	3.91497
2	172213250	172233250	Breast_SE_852_2	1.16264	0	0	0	3.14152	0	0	0	0	0	3.07099	0	2.36508	0	0	0	0	2.70953	5.81492	1.40128	1.08984	2.69438	5.03829	0	1.71654	5.83734	0	0	0	0	0	0	0	0.924699	4.56508	0	3.33536	2.56362	4.13777	2.17441	3.36193	0	0
2	172233250	172253250	Breast_SE_852_3	0	0	0	0	0	0	0	0	0	0	0	3.91247	5.99277	0	0	0	4.42112	3.11321	4.11586	0	0	3.32945	5.83781	2.2266	4.71716	4.50857	0	3.15653	5.78956	0	1.2923	3.43881	0	3.9346	5.7262	0	3.7641	3.81918	4.18881	2.59649	3.85709	1.18368	0
2	172437826	172457826	Breast_SE_853_6	2.34487	1.01384	0	0	0	2.45832	0	3.20259	0	0.636598	0	2.10934	3.63665	0	0	0	2.43368	0.429464	4.73796	2.08671	1.62046	2.843	5.56248	0	2.49258	4.42368	0	0	6.24403	0	3.30877	5.47088	3.39715	5.30167	3.99721	0	3.47398	4.79178	4.11989	3.01409	4.44863	0	3.1856
2	173147119	173167119	Breast_SE_856_7	0	2.11203	0	0	0	0	0	0	0	2.04719	0	5.98566	3.229	0	0	0	4.49321	0	4.73962	0	4.69793	2.71567	4.63987	0	0.460472	3.76042	0	0	4.84924	3.52916	2.28523	0	0	5.34929	3.59413	0	3.64267	0	2.09614	2.35575	1.97728	2.27996	0
2	187537117	187557117	Breast_SE_873_4	1.28883	0.417672	2.88858	0	0	0	0	3.51491	1.08424	1.23773	0	4.2445	5.06649	0	5.17732	0	5.12415	0.905431	6.46372	0	4.95048	0	0	3.39538	0.270907	4.18794	4.82413	3.4906	6.5306	2.99364	4.2401	1.0873	0	4.28174	3.87894	0	1.38163	0	0	1.363	0	1.7212	1.88377
2	199450183	199470183	Breast_SE_890_1	2.52349	4.63097	3.07868	3.65591	2.33661	3.28336	3.7119	4.1385	4.39845	2.22955	4.25169	6.27731	6.50667	0	5.52936	3.47651	6.37856	5.43114	0	4.65338	0	3.01823	5.59931	6.43653	5.96191	6.08727	6.25541	6.14212	6.46881	6.25293	0	0	5.4693	5.46007	6.41283	2.69986	4.01417	0	0	1.37723	0	2.82946	0.840492
2	200404280	200424280	Breast_SE_891_8	4.38991	2.14575	2.57122	3.18294	0.879481	3.34961	1.23426	0.509119	2.37072	3.75003	4.54658	3.29176	4.0163	0	0	0.974157	5.53758	0	5.846	3.80711	2.58631	2.59094	3.58027	3.44121	0	0	0	1.82763	6.09414	3.5766	3.38883	3.89775	4.27519	4.92777	4.05654	0	2.82527	0	1.97333	2.64543	3.36714	1.89498	0
2	200726293	200746293	Breast_SE_893_1	0	0	1.57419	0	0	3.42561	2.00349	4.73348	0	0	2.13124	0	0	5.91961	0	0	0	0	1.75566	5.47322	0	0	0	0	0	0	1.74906	0	4.15091	0	0	5.50124	0	0	0	0	0	6.44125	2.44024	4.7099	0	3.75904	4.32209
2	200746293	200766293	Breast_SE_893_2	2.94526	0.830711	3.49711	0	0	2.93347	0	4.81924	0	0	4.93626	0.0757943	4.80441	4.06373	0	0	4.23645	0	4.77862	3.14302	3.27255	2.27567	4.56694	4.03852	1.24743	1.31395	2.04388	1.43542	6.05857	0	0	5.54365	0	4.33292	3.25763	0	2.92797	5.57522	2.93602	4.82248	2.02002	2.73756	3.50308
2	203676929	203696929	Breast_SE_903_4	4.75859	2.81682	4.45552	3.28743	2.36033	2.25295	0	0	3.78411	1.49798	0	3.80423	1.16958	0	0	0	5.70611	0	0	0	0	3.15405	4.05716	0	0	3.95947	0	0	3.38126	0	0	0	5.06316	5.19595	5.07242	0	3.55543	0	3.12712	0.471797	2.96802	3.03885	0
2	205683091	205703091	Breast_SE_905_3	5.84397	5.37895	5.90675	6.11292	4.44744	5.29381	4.77378	5.20257	5.2191	5.07692	0	3.2648	5.40779	0	1.72664	0	5.26712	3.756	0	0	0.577057	3.34765	5.6336	5.47917	3.43696	0	0	4.80144	4.5588	0	1.55107	0	6.11005	4.32941	5.06326	0	3.45858	0	3.66639	0	1.22766	2.1113	0
2	207230648	207250648	Breast_SE_909_2	2.573	1.51243	2.99475	0	0	0.928542	0	0	0.305108	0	0	4.78031	1.21592	0	0	0	3.77788	0	5.28686	0	2.77928	3.62331	5.70249	4.87641	2.86821	4.96236	0	2.99343	2.5289	0	0	0	0	5.20579	4.69528	0	4.4208	0	3.38296	0.583198	1.987	2.32435	0
2	207320113	207340113	Breast_SE_910_2	3.54403	2.92276	3.26639	2.59244	2.16029	1.69681	0	0	2.49174	1.99714	0	4.61031	3.39361	0	0	1.54531	4.00659	0	5.14138	0	3.92448	3.57372	5.0475	4.09469	0	4.27277	0	2.719	4.98634	2.44383	0	0	0	4.68691	4.17309	0	4.13405	0	2.94653	2.18654	2.93251	2.99777	0
2	215427362	215447362	Breast_SE_922_3	4.23007	3.59063	4.06114	0	2.05125	3.63385	4.60068	2.94715	2.55917	4.17167	0	3.48051	2.56619	0	3.79448	0	5.55139	0	0	0	3.77823	3.67111	3.56332	5.67555	3.76707	0	0	5.28986	4.15597	2.94489	1.15071	0	0	5.14401	4.72041	0	3.69099	0	0.745395	1.63939	0	2.35648	0
2	216681710	216701710	Breast_SE_926_5	4.92912	3.36573	4.3828	3.21196	4.4006	4.48406	4.84394	4.84864	3.35539	3.43145	5.75729	0	4.10215	0	0	4.32677	2.57726	0	3.17711	5.44546	3.25568	2.47093	0.283476	2.19112	0	3.01519	2.96959	0	0	0	2.78349	0	4.61292	0	0.449994	3.79453	1.58485	6.41194	4.05817	3.5978	3.44169	3.81492	1.92857
2	217320930	217340930	Breast_SE_927_4	3.78648	2.20999	2.55233	1.4394	1.12326	3.65138	1.36665	4.581	0.861481	3.31823	5.33886	0	3.58086	0	0	0	2.66412	0	5.93263	5.59187	5.23021	0.746841	0	0	0	0	5.37909	0	2.10007	0	4.44672	0.173299	4.54026	0.112473	0	4.09216	0	5.87632	1.7837	2.73571	3.22712	1.24699	2.80059
2	217360930	217380930	Breast_SE_927_6	3.21812	0	1.93142	0	0	3.50979	0	4.11553	0	1.38439	5.15725	0	4.53656	0	0	0	0	0	5.88105	4.87418	3.46763	1.7531	0	0	0	0	4.63193	0	0	0	3.77331	0	3.3181	0	0	2.96254	0	6.01303	3.71854	1.94293	2.88912	1.73089	1.65618
2	217380930	217400930	Breast_SE_927_7	3.41078	2.19979	4.2087	0	1.17913	3.93722	0.452052	4.84243	0.844905	2.56952	4.70522	0	0	0	0	0	0	0	5.58028	4.83414	0.548928	1.84622	1.49687	2.43768	0	0	5.10165	0	0	0	3.4099	2.91982	1.05707	0	0	3.16804	1.77212	6.33269	3.2771	2.34952	2.1912	2.71058	3.57523
2	217702923	217722923	Breast_SE_928_4	4.67318	2.06723	4.15131	3.62899	2.4886	3.9764	0.334373	3.3885	3.20554	3.03361	3.95589	0	0	2.04278	0	0.589532	0	0	5.21207	3.23497	0	1.44959	0	0.181963	0	0	5.79861	0	0	0	4.87427	2.96489	5.49012	0	0	0	0	5.87772	3.02479	2.97108	3.98885	2.37371	2.85317
2	217975977	217995977	Breast_SE_929_11	4.25654	3.58949	4.11171	1.34217	3.55773	4.40599	4.15023	4.58037	3.18966	4.53305	3.62923	0	0	4.13268	0	1.35748	1.30107	0	2.70242	3.95322	5.31673	1.89572	0	4.44748	0	0	0	0	0	0	5.71567	3.24433	0	4.94801	2.53417	0	0	4.71632	4.26131	4.45679	3.10685	4.65662	2.59753
2	218730658	218750658	Breast_SE_931_3	5.82536	5.21522	4.79207	5.79683	5.84636	4.29757	2.46165	0	4.34792	5.33324	3.08843	4.21834	2.27501	0.933198	0	5.77298	4.15522	0	6.14584	4.30786	4.70627	2.53611	4.1562	0	0	0	0	0	3.99303	1.86649	5.36653	3.7339	5.68136	4.13589	4.13265	0	2.8719	0.193751	4.7936	4.25053	4.8114	1.8592	0
2	218875215	218895215	Breast_SE_932_6	3.61311	3.76101	3.82938	5.99271	4.36831	5.5319	5.13084	3.50762	3.49947	4.64644	0	0	0	0	3.79421	0	1.33839	6.52594	3.79834	0	5.0652	3.28253	4.44675	0	0	6.38219	0	3.48568	0	0	6.84764	0	3.21466	6.78096	3.61046	0	3.19904	0	0	0.416834	0	2.26932	0
2	218992214	219012214	Breast_SE_933_1	2.69573	0	0	0	2.06251	4.52393	3.48371	4.65948	0.612826	2.03272	0.351059	0	0	6.97578	1.52116	3.47453	0	0	0	5.33792	0	2.037	0	0	0	0	3.37187	0.935039	0	0	3.38186	6.24266	0	1.57545	0	0	1.89241	6.15435	0	3.50449	0	2.26245	3.69888
2	219449095	219469095	Breast_SE_938_6	5.10171	5.08104	4.38556	5.54937	4.34356	2.55479	2.32414	1.72591	3.8479	4.52947	3.23704	6.06013	5.31932	1.9537	0.670825	4.38414	6.80389	3.00726	4.08466	2.35994	6.37053	4.48684	6.19412	6.83076	4.5988	1.79233	0	6.07459	3.47383	5.23376	5.43073	2.62053	7.45257	4.88887	6.08787	0	3.26388	2.34557	1.4992	0	3.90488	1.84068	1.04152
2	226108142	226128142	Breast_SE_950_1	0.895787	0.203998	1.37669	0	0	0	0	0	0	0	0	2.86425	0	0	0	0	4.96175	0	5.07278	0	3.93654	3.34773	4.51189	0.581206	0	3.51116	6.42563	3.26849	4.11423	2.19735	0	3.48314	0	3.94525	2.91869	3.51003	4.37822	4.28541	1.04475	2.06338	0.794024	0.48503	3.57011
2	226795489	226815489	Breast_SE_953_5	4.80917	4.03881	4.60925	4.48322	4.25506	5.10287	4.04807	5.43168	4.7505	4.78469	0	5.48801	6.50477	0	5.27317	1.69484	7.46111	5.75094	0	2.54679	6.50703	3.9014	6.26236	6.46927	6.59566	2.53801	7.86258	6.3489	6.69432	6.13066	5.47369	4.19994	6.00936	5.02082	5.39365	4.01799	3.95019	6.07444	0	4.18439	2.85716	4.02017	0
2	227409862	227429862	Breast_SE_954_4	4.52679	3.00127	2.10094	3.41496	0.9517	1.34413	0	3.28975	2.4667	4.08624	4.34486	5.30538	0	0	0	4.46606	3.79374	0	5.52697	4.7071	4.29608	1.15067	1.87448	0	0	1.30262	0	0	0	1.12745	4.64758	0	3.02706	5.90928	1.73457	0	2.29533	2.31378	2.997	0	3.69613	1.47422	0.141327
2	230665229	230685229	Breast_SE_957_2	2.85919	4.23122	3.08115	2.85137	5.22264	4.19202	3.03921	5.16787	2.62365	4.69448	0.299729	0	0	0	0	0	3.76401	0	3.57482	0	1.07372	1.41496	5.34229	2.51767	4.39326	5.30115	0	0	3.55893	0	3.37036	0	5.11455	1.50174	5.07547	0	1.87092	0	0	2.64627	1.23205	1.48529	0
2	231664707	231684707	Breast_SE_964_5	6.6279	5.94131	6.33603	7.1296	6.05268	6.91053	6.22317	6.0223	6.372	6.78545	5.86567	5.85972	7.0615	7.08692	7.82155	4.96462	6.54647	5.54802	0	5.03054	4.93275	3.01211	4.4994	5.4879	0.618682	4.32864	6.46319	6.36757	7.14163	5.71212	6.7384	6.00118	7.17019	6.75568	6.76471	4.96157	2.22181	4.20588	2.32615	5.25482	4.62299	4.38212	4.25077
2	232386381	232406381	Breast_SE_965_7	0	0	0	0	0	0	0	0	0	0	4.94857	0	0	0	0	0	0	4.51188	0	0.0340769	2.80219	0	0	5.58228	0	0	0	6.15351	0	0	5.42097	0	0	0.307043	0	0	0	0	0	0	0	0	0
2	232625152	232645152	Breast_SE_967_4	5.58587	5.86751	3.80519	5.0168	5.52342	6.51769	6.01298	6.26094	3.69836	5.4601	0	0	0	5.43898	5.42972	4.63462	1.00421	0	0	6.07253	0	1.4318	0	0	0	0	3.64387	3.54416	3.38465	0	5.92565	5.15089	0.96729	0	0	4.15725	0.399312	6.43377	1.96242	5.48251	4.03626	3.75113	4.12284
2	232645152	232665152	Breast_SE_967_5	5.61825	6.19328	3.763	5.50352	5.26123	5.71914	5.2638	6.28153	4.01414	5.86753	3.03049	0	0	5.10384	3.15217	0	0	0	4.04596	6.66884	0	0	0	0	0	0	4.67738	0	0	0	6.30572	5.26809	0	0	0	4.40586	0	6.77826	0	6.34117	3.7265	1.03594	5.05747
2	233416945	233436945	Breast_SE_970_3	3.51031	2.94227	1.62651	3.08349	2.5505	2.99103	2.30614	3.42392	2.65129	1.42114	0	2.9209	2.6703	0	1.14598	0	5.58476	0	4.30281	4.21267	3.98617	1.59378	0	3.02352	0	3.65719	0	5.03486	6.03313	3.13811	3.65097	2.95419	0	6.25697	5.23494	0	0	0	2.52338	4.09236	2.55487	1.38948	1.15472
2	233679053	233699053	Breast_SE_971_1	0	0	0	0	0	0	0	0	0	1.64433	6.11013	2.2869	0	0	3.94917	0	5.63143	0.838174	7.37139	3.33036	5.45805	0	2.77774	3.05461	0	4.00561	2.06143	0	0	0	0	4.45903	0	4.13564	3.13213	0	0.413842	2.03138	1.35252	1.39319	0.512721	0	0
2	233699053	233719053	Breast_SE_971_2	0	0	0	0	0	0	0	0	0	0.663481	5.4954	3.7999	0	0	5.10138	2.32709	6.51006	0.499179	7.00721	3.52794	6.08177	0	0	4.95178	0	3.28165	3.38936	3.95443	0	0	0	4.78888	0	4.15449	4.49234	0	1.56685	3.2587	0.0220935	1.05233	0	0	0
2	234130148	234150148	Breast_SE_973_1	4.08449	2.23656	4.31218	2.82273	1.30486	2.42179	0	2.10595	2.8411	4.37743	0	3.24131	3.03275	0	5.41119	0	4.60357	0	2.43689	0	1.00542	3.92597	5.38224	4.17218	0	0	0	5.24853	3.90001	0	2.76811	0	2.99862	2.79164	0	0	3.6488	0	3.86538	0	3.33799	2.33398	0
2	234233203	234253203	Breast_SE_974_1	5.06972	3.42293	4.73084	3.64834	1.10163	3.3658	0	3.13281	3.6987	5.95049	3.8819	4.97317	5.71663	0	4.61378	0	5.99181	3.34023	5.36237	2.82455	4.57035	3.99699	6.25167	5.23044	4.29856	3.06864	0	5.31063	5.79089	4.45062	5.0938	0	1.87048	5.83182	2.67264	0	4.33743	0	3.56283	0.755315	4.48862	1.45661	0
2	234355908	234375908	Breast_SE_975_1	4.28017	0	3.30553	3.41074	1.92809	4.20603	0	3.74792	1.79965	4.74132	4.70131	0	0	4.93752	4.68391	0	0	0	6.89035	5.02521	3.03512	1.54773	0.238209	1.44178	0	0	4.01318	2.59966	0	0	4.61176	5.38158	5.70584	0	0	3.15671	1.21695	2.8828	4.06459	0	4.05206	0.674091	5.70031
2	234958771	234978771	Breast_SE_976_2	3.3542	3.52884	2.6896	1.42407	3.13696	3.13904	3.77095	4.43627	3.4182	3.98941	0	4.17793	2.57595	6.16404	4.72845	0	4.83418	0	3.63193	5.51507	5.97123	2.64326	3.19291	5.22597	0	0	1.90037	5.50236	4.65293	3.47283	5.75124	4.54084	4.65001	5.06482	4.85025	1.34222	1.38915	5.92328	3.24607	5.07794	4.40619	2.28617	4.20212
2	234978771	234998771	Breast_SE_976_3	4.43961	4.15736	3.60227	1.62316	2.32418	4.36013	4.3852	5.32295	3.70495	4.75348	1.58602	4.68689	3.91361	5.82179	6.63526	0	6.20317	0	5.62821	6.02176	6.65388	3.22454	3.57125	6.42526	1.06091	1.12547	4.20865	6.84082	6.48506	2.9907	6.02584	5.24263	5.80327	5.07396	5.85185	2.73796	2.19729	6.08491	3.71833	6.01223	4.43885	1.98318	4.34717
2	234998771	235018771	Breast_SE_976_4	0	0	0	0	2.64087	3.5089	3.87409	5.98753	0	3.96185	5.22233	0.259821	0	6.69693	4.63552	1.87213	2.46387	0	4.48305	5.36384	5.43266	2.51992	2.80159	3.56825	0	0	2.78418	4.26978	3.4782	0	5.92833	3.60386	3.28184	3.87791	4.09151	0	1.2831	5.13104	3.64236	5.32084	3.3553	1.84078	4.09805
2	235038771	235058771	Breast_SE_976_6	3.10228	2.39985	2.16638	0.15578	2.83566	3.99066	3.86018	6.0244	3.29072	4.81485	0	0	1.7679	4.69483	3.33061	2.64205	3.45547	0	3.13786	4.71529	5.32596	0.56989	0	4.15462	0	0	1.85084	3.88356	3.1909	0	5.43651	2.596	7.5255	4.16129	4.72788	0	0.364527	4.73681	0	4.72438	4.79675	0	3.71197
2	235543219	235563219	Breast_SE_977_4	3.104	0	0.294201	3.55566	3.09742	3.98128	2.78964	3.46713	2.88715	5.0434	4.47717	0	0	4.675	0	4.35321	0	0	4.25271	4.47039	2.49597	0	0	0	0	0	6.05037	0	0	0	4.19731	5.77698	2.96604	0	0	4.0918	0	6.08962	0	4.79253	4.58404	3.45101	3.44112
2	236755389	236775389	Breast_SE_979_7	2.43492	0	1.26041	0	0	0	0	0	0	0	2.66914	4.63254	3.35325	0	0	0	4.8299	0	3.95889	0	0	4.03686	5.12935	3.67396	0	3.31896	4.80573	5.62711	0.310764	0	0	0	0	2.57864	4.27607	0	3.36713	0	4.36195	0	0	1.34224	0.496118
2	237195610	237215610	Breast_SE_981_5	4.80383	3.57046	5.43275	1.01995	3.62406	4.03437	0	5.10445	2.53491	4.76408	1.65243	3.10811	3.38465	0	0	0	6.23882	0	3.26618	0	4.10314	0	0	5.91619	0	0	2.84614	6.20173	3.82881	0	0.11529	0	0	3.18811	4.99658	0	0	0	2.26805	3.91351	3.10336	4.72277	0
2	237215610	237235610	Breast_SE_981_6	3.86607	3.02029	4.15514	0	2.09112	2.78862	0	3.7082	2.36361	4.14609	0	6.55283	0	0	0	0.514535	6.32515	0	2.9643	0	4.16662	0	0	5.35419	0	0	0	5.05648	4.05239	0	0	0	0	2.72374	4.64014	0	0	0	2.35403	4.11297	2.88527	3.46453	0
2	237275610	237295610	Breast_SE_981_9	4.60859	3.86983	5.21205	1.04861	3.13629	3.21701	0	4.11086	3.08905	3.02731	0	6.88393	0	0	0	0	6.17966	0	3.99928	0	3.42015	0	0	5.87112	0	0	0	5.39226	3.23132	0.287568	0	0	0	2.61838	4.9747	0	0	0	1.68314	0.809421	1.80448	3.68966	0
2	237415610	237435610	Breast_SE_981_16	4.00182	1.81807	4.52697	1.31224	1.63331	3.80606	2.60687	3.42212	1.74402	0.73382	0	3.76426	2.69208	0	0	0	6.4677	0	0	0	0	3.7312	3.93945	5.3846	4.44165	0	0	5.64329	5.28646	0	0	0	0	5.09343	4.95647	0	3.22265	4.58092	2.40383	0	2.14835	3.99027	0
2	237475610	237495610	Breast_SE_981_19	3.92367	3.14388	4.6498	2.56048	2.67194	6.1986	5.61503	6.83557	2.18281	5.86917	5.97635	6.24235	6.19512	6.62266	0	0.816113	5.0446	0.960745	4.92909	5.75146	5.54489	2.6286	0	4.5261	5.55006	0	7.79468	5.99645	6.94296	0	5.19467	7.28098	0	5.64382	3.88026	5.05727	2.34352	7.54159	2.26146	6.29702	4.93754	3.56876	6.88304
2	237495610	237515610	Breast_SE_981_20	1.11354	0.443406	3.0768	0	0	5.06901	4.26378	5.8675	0	4.05255	4.42714	6.20572	6.42285	5.77607	0	0	4.44424	0	4.69524	5.24264	5.27593	1.21118	0	5.04308	3.65629	0	7.2044	5.30228	6.44523	0	5.32409	7.00353	0	4.10556	4.49888	5.09601	0.72923	7.25493	0.732644	6.12824	4.13524	3.84567	6.37889
2	237575610	237595610	Breast_SE_981_24	4.58042	2.4848	2.70818	2.29283	2.86764	3.76408	2.5851	5.43488	2.51688	4.171	4.85428	0	0	4.36279	3.88259	3.91633	0	0	4.73136	3.65802	4.44064	2.93622	4.09452	0	0	0.509408	5.40698	3.26281	0	0	4.2282	4.80532	4.51753	3.66309	0	4.35945	1.8567	5.50426	2.33789	4.98482	4.27002	2.08814	4.13613
2	237855109	237875109	Breast_SE_983_1	4.00228	2.78811	3.90927	0.0812507	2.93274	3.89589	2.65847	3.91909	1.90563	2.88403	3.77616	6.88216	6.90014	0	0	3.04636	3.83603	2.24312	0	0	5.24556	3.80557	5.17083	5.44148	4.79766	5.56107	2.08515	5.26214	5.90739	6.6885	3.62966	0.60624	0	4.857	6.51269	0	2.99253	0	0	2.80595	1.38193	3.47315	0
2	237875109	237895109	Breast_SE_983_2	0	1.42984	1.479	0	0	2.38527	0.979316	1.19059	0	0	1.96379	6.00771	5.14061	1.591	0	0	3.03173	1.24233	0	0	4.07125	2.16622	3.64747	3.85404	5.28767	5.46759	0	4.7132	2.81669	5.71393	3.79842	0	0	2.65248	5.45953	0	2.06583	0	0	0	0	3.583	0
2	238835034	238855034	Breast_SE_987_1	2.78865	2.56563	2.92252	0	1.95494	3.49669	2.78295	4.70011	0	2.72247	2.81968	5.83916	0	0	0	6.53747	5.90746	4.22622	0	0	4.88624	1.81957	4.5349	5.34235	5.29031	4.74649	0	5.52688	0	5.01033	2.7344	0	0	1.29594	5.81339	0	2.89504	0	0	0	0	4.06158	0
2	238855034	238875034	Breast_SE_987_2	1.47097	1.74612	3.06744	0	0.216565	3.19484	1.08822	3.4928	2.08149	2.90649	3.34876	5.67497	5.10992	0	1.87239	4.41869	5.77647	0	0	0.740707	5.31256	2.10301	3.47563	5.62525	4.06541	3.54578	3.92141	5.64436	4.60132	3.14409	3.79561	4.49571	0	3.7794	5.93447	0	1.21141	2.10654	0	3.84368	3.02319	3.66472	0
2	238935034	238955034	Breast_SE_987_6	0	0	2.23321	0	0	0.727487	0	0	0	0	0	0	0	0	0	0	5.41902	0	0	0	0	1.81935	5.09606	5.44563	4.96866	0	0	4.82157	4.65916	0	0	0	0	1.09148	5.09852	0	1.97871	0	0	0	0	3.67812	0
2	239256388	239276388	Breast_SE_989_5	5.24323	5.10932	4.26471	4.85268	4.74291	5.91693	6.07617	5.44244	4.18673	4.24351	0.94342	3.60802	4.80516	2.85171	3.88251	6.58976	6.24546	0	1.17147	0	4.61282	1.49929	3.40421	5.04242	0	3.59196	0	6.29797	6.37783	4.36068	3.13973	5.70248	0.429393	4.82807	5.88168	0	1.43657	0.885405	3.56338	5.12791	3.3834	4.49597	0
2	240371738	240391738	Breast_SE_990_5	2.17281	0	3.06351	2.94013	0.700352	1.111	0	2.23855	0	0	3.81425	0	6.19004	0	3.4465	0	7.05717	4.43974	0	0	5.34285	2.6578	2.61208	5.57745	2.60405	0	0.294378	3.88059	4.50851	5.55473	1.74685	0	0	2.90533	6.70859	0	2.07912	0	0	0.93396	0	4.2917	0
2	240416682	240436682	Breast_SE_991_1	2.83721	0	3.81771	3.59783	1.66744	2.48374	2.0783	2.90036	0.283436	0	5.11256	2.042	6.22901	4.37779	4.15052	0	6.6141	5.98515	0.496369	2.09461	4.76341	3.4691	5.6943	4.69049	5.25917	5.90458	3.82532	3.31127	3.1113	5.26833	1.95328	1.73965	0	5.46088	6.06391	0	2.84699	1.5268	0	2.63243	0	3.33668	2.51672
2	240436682	240456682	Breast_SE_991_2	0.737005	0	3.25487	2.98106	1.9444	3.81992	4.19914	3.14164	1.74521	2.80605	4.70996	0	5.31358	4.74054	5.31401	3.79824	5.31374	6.88645	0	1.77768	5.57458	4.56486	6.87194	2.13211	5.08294	4.66885	4.91125	4.32055	2.07822	6.27544	5.37865	4.73597	0	0	5.85355	4.00538	4.00697	4.24792	0	3.50585	0	3.00642	4.99338
2	240879615	240899615	Breast_SE_993_2	3.5074	0.0860774	5.01154	3.98966	2.98688	5.28643	5.10158	5.62274	3.59877	5.36178	5.63709	0	0	7.03703	0	6.31896	0.406761	4.02229	4.3872	4.34716	4.38561	1.59348	0	0	0	0	3.543	0	0	0	6.84268	0	0	4.9705	0	1.6753	0.13864	7.41105	0	0	1.33421	0.876888	4.97191
2	240899615	240919615	Breast_SE_993_3	3.59739	1.81845	4.28295	3.2128	3.73901	5.39345	4.05805	5.85053	2.70735	4.40463	3.4056	6.52747	0	6.37801	0	1.75503	6.43705	0.333569	0.414354	2.04757	1.00979	1.51462	0	4.12095	0	0	0	2.59346	0	0.715218	5.35286	1.5882	0	4.13852	5.28918	0	0	6.31139	0	0	0	3.28088	4.4723
2	240919615	240939615	Breast_SE_993_4	0	1.01327	2.88304	0	2.28385	2.98351	2.52891	3.20481	0.166133	1.75794	0	6.99903	0	2.95965	0	0	6.95694	0	0	0	0	1.59345	0	5.28314	1.56024	0.180091	0	4.0369	0	0	1.33663	0	0	1.82578	5.95701	0	1.02241	0	0	0	0	2.89956	0
2	240999615	241019615	Breast_SE_993_8	1.13005	0	2.04922	0	1.06379	4.3406	2.71917	3.65969	0	3.76918	4.07456	6.387	0	5.84813	0	0	5.71743	1.02914	2.47711	1.8418	3.77057	1.77976	0	3.97842	0	0	0	3.74907	2.87835	2.82627	2.73686	0	0	4.65668	3.6561	0	0.133582	3.80193	0	0	0	3.8252	1.72988
2	241558481	241578481	Breast_SE_996_2	2.86527	1.88365	3.97906	3.7613	3.59846	4.04856	3.64399	5.59086	2.83426	5.35288	5.1138	4.16402	5.40839	6.31176	4.36008	6.66855	0	4.70151	0	4.61959	5.4853	3.54598	3.24488	4.77838	0	4.04109	5.97248	4.40667	2.92209	5.13289	5.79172	0	0	4.65869	4.24479	3.38435	2.81817	5.28357	0	3.44641	3.0474	2.11833	2.87183
2	241763838	241783838	Breast_SE_997_9	0	0.0171349	0	0	2.3571	3.71999	4.90453	1.45917	1.42479	2.31178	1.63523	0	0	8.26711	2.87015	2.16552	0	2.13181	0	3.89602	1.68782	1.94432	0	0	0	1.87143	2.50727	0.111106	0	3.71919	4.66169	4.58349	0	0	1.85414	0	1.33593	6.00077	0	0	1.03479	2.9562	1.71996
2	241872340	241892340	Breast_SE_998_5	3.95363	2.85863	2.03746	1.81872	5.02208	5.36341	5.44589	6.63477	3.17721	5.35327	6.61174	2.0731	1.56028	7.46187	2.34394	2.84367	3.38242	0	6.05152	4.88244	3.15522	1.845	0	0.00390985	0	0	6.27947	2.57467	0.35327	0	4.77792	1.54293	2.61503	0	0	3.7535	0.499885	7.52315	0	2.9912	3.02525	1.30286	5.94123
2	241892340	241912340	Breast_SE_998_6	1.63991	0	0	0	3.39469	4.87837	4.30446	6.65348	0	4.81108	6.21286	0	0	7.27332	0	0.857795	0	0	4.48926	3.60034	2.65891	1.71051	0	0	0	3.62596	4.31837	1.05723	0	0	5.21783	0	0	0	0	1.19529	1.90939	7.14724	0	2.59153	2.01703	2.3335	4.47077
3	4729244	4749244	Breast_SE_1000_5	4.82651	3.34135	5.02466	4.4665	2.71531	5.20536	3.17755	5.1877	3.75531	4.85091	3.61221	0	0	0	2.56601	3.37901	4.51812	0	6.20687	5.7167	3.44831	1.89622	0	4.12901	0	0	0	3.64062	3.57458	0	5.07114	2.15101	0	5.96269	4.86648	0	0	3.37857	4.35203	5.15999	4.70343	3.9271	0.825783
3	4749244	4769244	Breast_SE_1000_6	3.97509	2.58526	3.93968	4.56805	0	4.66612	3.50776	3.29089	1.89876	4.26449	1.91337	0	0	0.00882526	4.47722	3.47373	0	0	6.96545	5.69736	3.85321	1.01973	0	0	0	0	0	2.81121	0	0	4.9651	3.55581	0	5.78052	3.99065	0	0	4.30463	4.5524	5.32032	4.24363	3.2558	1.48411
3	5002712	5022712	Breast_SE_1002_3	3.12847	3.36759	4.0489	3.57221	2.28462	4.57928	3.27518	3.54849	3.1314	2.74124	0	0	3.86189	0	1.53681	0	5.76451	0.55411	3.67793	0	0	3.57754	4.50649	4.42763	2.61979	4.26898	0	1.27681	6.64186	1.6429	3.65714	3.88258	0	4.60536	6.17093	0	3.42715	2.34841	4.00823	4.00038	1.74926	3.37484	0
3	8496200	8516200	Breast_SE_1004_4	4.77733	4.78018	4.95142	4.41268	2.40376	5.31963	3.37494	4.70334	4.69712	4.19714	3.58763	0	3.35872	0	0	0	4.3858	0	5.6443	4.65093	2.39501	1.90896	0.702278	2.0549	0	0	3.47517	3.80546	3.76141	0	0	6.08896	5.75349	0	2.85258	3.11527	1.58328	4.10047	2.78448	4.01477	3.62517	2.43523	1.08712
3	8760791	8780791	Breast_SE_1006_4	0	0	0	0	0	0	0	0	0	0	0	4.24098	8.04205	0	0	0	0	0	0	0	0	2.16674	0	4.71819	0	0	0	0.511451	0	0	0	5.46043	0	0	2.34093	0	1.74549	0	4.56618	2.8316	0	0	0
3	9850994	9870994	Breast_SE_1012_2	4.38882	5.44715	4.03296	5.53993	5.60392	3.44375	3.35037	2.74205	5.31539	5.49845	4.13126	0	0	1.99763	2.92799	1.72638	5.30252	0	4.48699	4.80624	5.11421	3.05727	2.52396	0	1.61482	0	0	4.99234	0	4.55438	5.45751	1.39643	5.67585	4.86944	2.19691	0	1.90494	0	3.9198	0	2.66212	1.37051	2.12672
3	10159265	10179265	Breast_SE_1013_2	4.17561	3.65462	3.20809	5.35781	3.80414	4.5878	3.56379	3.00317	2.4238	4.21109	0	4.87363	2.24453	0	0	0	4.84331	1.86059	2.49634	1.54316	3.52733	1.43207	2.4206	4.66731	2.5235	0	0	5.28268	5.30506	5.05068	1.86527	0	0	2.37025	5.76727	0	2.08883	0	0	2.77089	1.24016	2.6364	0.764359
3	10179265	10199265	Breast_SE_1013_3	5.22112	5.01975	4.53955	5.82335	4.84179	6.13515	5.61291	4.23661	4.39253	5.23506	0	7.18936	0	0	2.32813	4.50496	6.65552	3.20129	5.76745	2.94379	4.59523	2.79041	5.74851	5.93113	4.77547	3.12984	0	5.75941	7.1253	5.94682	4.43861	3.22903	3.58997	5.96796	6.77087	0	3.28263	1.5062	4.46978	5.16073	5.01997	3.65377	1.39516
3	10199265	10219265	Breast_SE_1013_4	3.73754	3.59651	2.80185	3.9533	2.81154	4.12167	3.67496	3.038	1.77244	4.40339	0	6.63546	3.96658	0	0	0	6.19446	0.289776	2.57354	2.40752	3.80835	2.12443	3.92392	5.0776	3.50928	0	0	3.88671	6.71129	5.17963	3.1092	0	0	5.63363	5.67602	0	2.6349	0	2.57796	4.17014	2.85711	0	0
3	11127432	11147432	Breast_SE_1016_2	3.24235	4.0184	3.90122	2.50031	0	0	0	2.9721	1.3585	1.82163	3.45171	6.97794	3.84404	0	3.86141	0	4.8992	0	5.57487	0	3.09823	0	3.88787	4.50473	2.29662	3.31386	0	4.09678	5.08688	0	2.18896	0	0	3.75933	4.9143	0	0.894083	0	2.22437	0	2.74474	2.15571	0
3	11207432	11227432	Breast_SE_1016_6	4.25406	3.12921	3.95491	3.55237	1.68646	3.43328	1.82649	3.41575	3.2771	2.43763	4.08028	3.23779	4.07806	0	0	0	5.2637	0	4.51569	3.57018	4.57741	0	0.708367	4.72062	2.61512	2.44103	0	4.48891	6.41488	4.58204	2.63938	0	1.95515	4.35207	5.79726	0	0.731424	0	1.84728	1.12693	0.58921	1.69321	0
3	11287432	11307432	Breast_SE_1016_10	3.82377	4.34481	4.30993	3.57493	2.98511	4.41087	4.03556	2.92266	2.96117	3.38499	4.68073	5.96565	3.4391	0	0	0	5.2924	0	6.25009	5.15517	4.69397	0	2.7416	4.1342	0	0	0	1.83737	6.26751	5.19458	3.80462	0	2.14314	5.24078	5.05431	0	2.36073	0	2.07334	2.31261	2.44104	3.00678	1.17986
3	11497026	11517026	Breast_SE_1017_5	4.80918	2.91175	4.37902	1.45947	3.3079	3.32257	0.315269	3.63299	3.12656	3.58299	1.48605	3.51056	0	0	5.82002	0	4.10053	0	3.71568	3.29043	3.51978	0	0	5.49996	0	0	0	5.11026	4.74085	3.61149	3.01196	5.47166	0.750128	3.55265	4.33166	0	0.245489	0	2.60372	3.48382	2.62658	3.18794	0.976881
3	11537026	11557026	Breast_SE_1017_7	4.74475	4.74193	4.836	2.08661	4.70086	5.12194	3.32575	5.15859	3.94776	4.5826	0	4.72937	2.89007	4.35115	5.81226	0.785775	4.34617	0	0	4.80178	4.45886	1.41498	0	4.48431	0	0	0	4.79505	2.29132	0	2.42403	5.79294	0	0	3.93264	0	0	3.92268	3.81596	4.0858	2.83437	4.56625	2.04754
3	11557026	11577026	Breast_SE_1017_8	6.21561	5.46072	6.03211	4.58619	4.80013	5.2856	3.85329	5.74338	5.88287	5.83457	2.13002	4.77147	6.00497	0.633646	5.99539	0.65906	6.44164	0	0.591359	0.990667	5.70374	3.71368	5.37447	6.08347	4.21264	2.46536	0	6.27296	6.82869	4.67607	3.08728	4.52003	5.13299	3.63404	6.38855	0	2.94814	1.10024	4.97755	4.41573	4.22403	5.37489	1.53966
3	12187761	12207761	Breast_SE_1019_2	0.59928	0	0	0	0	0	0	0	0	0	4.02612	5.77487	3.42616	0	0	0	5.34443	0	4.66451	0	3.04472	1.27079	0	3.5908	0	0	0	0	4.51059	1.08054	0	2.22011	0	4.6544	3.15016	0	2.21681	0	2.64398	1.388	0.0819994	2.82728	0
3	12283390	12303390	Breast_SE_1020_1	0	1.8753	2.24157	0	5.98952	0.487355	2.45355	4.14059	2.85001	0	5.3736	4.53569	5.63131	3.26002	3.97308	4.30406	5.53098	5.41964	0	1.184	4.21223	0	0	3.78371	3.88231	0	0.630018	4.11466	4.86885	5.50622	3.5383	2.23767	0	5.41995	5.14947	0	0.267428	0	1.90693	0	0	2.98546	0
3	12436022	12456022	Breast_SE_1021_2	0	0	0	0	1.35643	0	0	2.28482	0	0	5.17735	0	5.13238	0	3.20063	0	0	2.35521	5.10335	3.65116	2.42431	0	0	4.70308	0	0	0	3.45262	0	0	0	4.67902	0	6.24701	0.120477	0	0.174322	0	3.59648	1.97482	0	2.85086	0
3	12974774	12994774	Breast_SE_1024_4	4.64425	2.81554	4.39663	3.73815	4.19311	4.89193	4.0224	4.17621	3.7455	3.79385	5.6188	0	0	0	3.10002	3.89936	0.678433	0.166564	0	5.46965	4.47005	1.69646	0	2.81842	0	0	5.34483	3.3408	3.46882	3.77782	3.76676	0	0	3.16565	0	4.09992	0.526775	4.12127	2.85498	4.90423	3.21289	2.1825	2.52861
3	13014774	13034774	Breast_SE_1024_6	5.27931	5.32885	4.86252	4.63492	5.70221	6.03663	5.70858	5.02438	4.96289	4.46462	0	0	0	0	0	6.17321	5.96638	0	0	4.35399	4.93707	0.537718	0	5.21065	0	0	0	5.79076	3.75418	4.92288	3.27581	0	0	3.67731	3.57105	0	0	0	0.429314	4.78746	2.79576	3.85015	1.1183
3	13490932	13510932	Breast_SE_1025_3	1.4786	0	3.57279	3.7358	1.69686	1.79877	0	1.6427	3.95583	1.49397	4.4541	7.63564	5.96484	3.13597	2.74555	4.46012	5.41234	0	3.99928	3.2612	5.44486	1.84501	0	5.82319	0	0	5.08325	5.4435	0	5.0022	4.54276	5.9402	6.3711	2.34743	2.21506	0	0	2.21017	0	0	0	2.65312	0.998628
3	13510932	13530932	Breast_SE_1025_4	3.51054	3.18744	5.13458	4.28297	3.18489	3.81455	1.09453	4.96181	4.90954	2.9213	3.80698	5.08993	0.250587	0	0	5.6815	3.38533	0	3.49649	1.56171	2.55713	1.90822	1.88198	2.54311	0	0	4.75378	5.87178	0	2.5431	4.62612	3.80093	6.57486	1.69552	0	0	1.99379	0	3.63041	0	0.766817	4.975	0.770621
3	13530932	13550932	Breast_SE_1025_5	4.95286	3.48949	6.22167	4.91453	3.64456	4.3164	2.26998	4.95434	5.80701	3.24302	5.10673	7.26125	6.31249	0	2.07225	1.66325	6.26642	0.633707	4.67465	3.36396	5.19323	0.473434	1.83029	6.75136	2.79337	0	5.9886	6.2774	5.08172	6.34929	4.3895	3.86677	7.7534	4.50157	4.19977	0	1.1477	0	2.42782	2.66787	1.74239	4.22376	1.00521
3	13842621	13862621	Breast_SE_1027_3	0	0	0	0	0	0	0	0	0	0	4.91649	0	0	0	0	0	0	3.72822	3.8147	0	0.766322	4.29107	6.8467	2.052	5.67173	3.54361	0	0	0	0	0	0	0	3.20831	2.26809	0	3.824	0	3.1198	0	0	0	0
3	14220940	14240940	Breast_SE_1029_2	0	0	0.818563	0	0	2.06448	0	1.0936	0	0	6.02002	0	0	0	0	0	0	0	7.32634	5.34702	0	0	0	3.86054	0	0	2.94971	3.29049	0	0	1.25517	6.51734	0	3.11124	0	1.34162	0	3.93286	2.88511	3.13601	3.14126	2.30806	0
3	14407470	14427470	Breast_SE_1030_7	4.35604	4.5502	4.24388	4.71703	4.42414	4.99441	4.56695	3.79798	2.55284	4.48286	6.29713	2.34718	3.88357	0	3.87821	0	7.17645	0	4.01189	3.64112	5.49286	3.03501	3.76275	6.58834	3.67493	0	3.65181	2.57557	5.85045	4.5897	4.01371	5.66885	0	4.07942	6.37113	3.75227	2.09112	1.76511	2.56164	5.80394	2.89125	2.20541	0
3	14427470	14447470	Breast_SE_1030_8	5.07738	5.70274	4.9778	5.90487	5.90033	6.17229	5.80837	4.6613	4.88906	5.43324	4.39114	2.84622	6.08025	0	3.14736	0	6.33578	0	1.98838	0.518813	5.19546	2.65057	2.93486	4.65188	2.29534	0	4.21598	3.61749	5.83649	3.73214	3.18776	5.55073	2.8789	2.99835	6.04491	2.73562	1.47768	0	1.61922	4.69203	4.46246	2.20188	0.831604
3	14447470	14467470	Breast_SE_1030_9	3.99328	2.80891	3.76444	2.80789	4.54396	3.91915	2.54777	3.29362	1.88819	3.94835	4.68971	5.94713	2.39839	0	3.50268	0	6.34275	0	2.08137	3.1817	4.53967	2.60585	2.82772	5.56897	0.932681	0	0	5.06569	4.31279	0	3.59062	4.31032	0	0	4.78871	0	0.599067	0.786339	3.21171	3.86288	2.53144	3.06002	0
3	14467470	14487470	Breast_SE_1030_10	2.06443	0	0.472064	0	2.6063	0	0	0	0	0	0	3.83771	4.51113	0	3.3372	0	5.58716	0	0	0	4.95366	2.62812	1.32183	5.04212	0	0	0	3.50651	2.95212	0	0	0.746985	0	3.7855	4.72623	0	0.899307	0	2.56195	0	0	0	0
3	15618330	15638330	Breast_SE_1038_2	3.7198	2.72613	3.44685	0	2.73353	2.73478	0	2.02049	2.57606	1.95883	0	3.74204	6.14196	0	0	0	4.23175	0	0	3.15187	4.66937	0	3.00027	4.6825	2.88812	0	3.88249	4.2917	6.5958	0	0	4.23144	0	3.31843	4.93745	0	0.465699	0	3.14944	2.95431	2.49411	2.98847	0
3	15638330	15658330	Breast_SE_1038_3	3.6181	2.15627	3.21192	0	2.26788	1.01027	0	2.03018	2.48075	2.87595	0	5.22323	6.01746	0	0	0	5.15275	0	0	0	4.61094	2.03767	4.34754	5.02246	2.46968	0	0	4.36118	6.5185	0	0	0	0	3.95667	5.04537	0	1.63066	0	2.26294	0	3.16816	2.43949	0
3	16058403	16078403	Breast_SE_1040_2	4.87254	2.80532	4.70003	1.7207	1.98782	2.59502	0	3.44009	3.035	3.60783	0	7.00333	5.74011	0	0	0	4.8118	0	0	0	3.49098	1.53224	2.00932	4.88081	1.47722	0	0	2.94601	6.05147	0	0	0	4.39104	5.42191	5.06546	0	1.1115	0	2.91196	2.88616	4.08535	2.78788	0
3	27516533	27536533	Breast_SE_1051_1	3.5658	3.63335	3.92517	1.01961	1.23838	2.42056	1.09593	2.06669	2.70778	3.13371	2.65	6.15358	4.16399	0	0	0	4.66814	0	5.35538	1.50632	4.26256	3.00691	4.71149	5.47325	1.46502	2.38655	2.56983	3.8094	5.92417	1.11461	0.961156	0.32039	0	3.76827	4.66497	0	3.20083	0.418391	3.02063	2.18079	1.99419	1.50306	0
3	29277206	29297206	Breast_SE_1052_1	4.07631	3.29653	3.40907	0	1.72202	0	0	1.44179	2.64714	2.97747	0	3.88063	1.84326	0	0	0	4.67888	0	0	0	4.8393	3.49021	3.98171	4.36359	0	4.1533	0	5.12896	5.36062	1.62596	0	0	0	1.36786	3.77829	0	4.13275	0	2.31517	0	0.621186	1.89076	0
3	32405922	32425922	Breast_SE_1062_3	5.1688	4.73045	4.35467	4.8814	4.73766	5.08877	2.89475	2.90494	4.8562	5.77076	0	0	2.92443	0	2.34599	3.18148	4.18133	1.85492	4.53759	2.69938	3.00747	3.9015	5.89647	0	2.46925	0	1.22722	0	6.446	0	4.70238	5.70732	6.84854	5.13744	0	0	4.09344	2.17265	4.34139	3.62178	4.80649	1.80462	0
3	39120088	39140088	Breast_SE_1073_2	4.07049	1.87266	2.25727	2.91892	3.50608	4.39414	3.28052	5.39592	3.54202	5.34435	5.31432	2.12816	0	5.57608	0	0	0	0	4.3548	5.63057	3.01589	0.717364	0	0	0	0	4.19432	0.393641	0	0	4.40277	4.25025	4.58245	4.39563	1.60117	0	0	4.98296	0.853125	4.88986	3.77016	1.3194	2.52247
3	42465736	42485736	Breast_SE_1075_1	2.56446	0	4.11687	3.25027	0	4.60624	1.91793	4.89088	0.203091	3.6429	2.55043	0	0	6.12763	3.54021	3.85894	0	0	6.19955	6.00122	1.49202	0	2.61155	1.9575	0	0	3.28043	1.59865	1.53732	0	5.02635	6.79748	5.60134	0	3.35516	4.48631	0	6.37604	3.5109	3.94619	3.51853	0	5.29435
3	42485736	42505736	Breast_SE_1075_2	3.07715	0.993699	4.35217	3.53833	1.78045	5.24542	3.40423	4.89643	2.64829	3.80786	2.02045	0	0	6.19851	3.80933	0	0	0	4.47958	5.32786	0.868153	1.9803	2.5817	4.92218	0	0	3.62043	3.9971	2.2795	0	5.49188	7.0572	3.30577	0	4.07217	4.72675	1.62019	5.82575	3.32102	5.19166	3.67243	2.47187	4.57615
3	43864910	43884910	Breast_SE_1081_2	2.5824	0	1.3867	0.907509	0	0	0	0	0	0	0	5.03835	4.20941	3.35028	0	0	6.42576	0	2.71015	2.17662	0	2.79051	5.56564	6.531	4.9165	0	0	5.0415	6.97998	1.05062	0	2.56784	2.37248	2.83869	5.00774	0	3.27877	0	4.08277	2.44143	3.56428	0	0
3	43991896	44011896	Breast_SE_1082_1	1.41548	0	0	0	0	0	0	0	0	0	0	5.30933	5.87694	0	0	2.07209	6.12304	2.82255	0	0	2.78612	1.95732	2.81897	4.40299	3.75366	0	0	4.67818	6.89737	2.71422	0	0	5.42011	3.20927	0	0	1.7416	0	0	0	0	1.79053	0
3	44873870	44893870	Breast_SE_1083_1	0	0	0	0.812854	0	0	0	3.338	0	0.831412	0	3.42767	4.18977	0	0	0	4.92995	0	2.65064	0	4.26275	3.15399	5.55192	4.16215	5.16905	4.32976	0	3.50009	5.09523	3.09648	0	0.596617	0	4.43709	2.77954	0	2.81731	0	1.72355	0	0	0	0
3	45073870	45093870	Breast_SE_1083_11	2.94937	1.79905	2.43446	0.479056	0	2.69037	0	3.35383	0	2.92349	0.0425153	6.28331	0	0	0	0	4.41518	0	3.29632	0	2.98804	1.37988	0	4.25419	0	0	0	0.603093	5.49965	0	0	0	0	4.06867	4.92641	0	0.92898	1.33063	0	2.82031	0	2.08081	1.70337
3	45093870	45113870	Breast_SE_1083_12	3.71493	2.36352	3.20198	1.21553	0.133763	2.28791	0	2.468	0	1.72533	0	5.89354	0	0	0	0	4.89038	0	0	0	2.70296	1.12942	3.43075	3.94438	1.83816	0	0	0	5.40958	0	0	0	0	4.12808	5.2989	0	1.77294	0	0	0	0	2.48227	0
3	45113870	45133870	Breast_SE_1083_13	3.81234	2.9862	2.75364	0.869332	0	1.5121	0	0	0	2.389	0	6.9253	0	0	0	0	5.4813	0	4.01381	0	4.14461	2.40302	4.73543	5.38103	2.59833	3.12343	0	0	6.29188	3.90556	2.3634	0	0	4.84076	5.8501	0	3.3125	0	3.17508	3.15236	3.7362	2.96682	0
3	45974052	45994052	Breast_SE_1085_5	3.41351	4.13488	3.47296	3.48661	5.00544	5.95117	5.24764	5.87658	2.76935	3.13453	1.4383	0	0	4.68927	0	0	4.10575	0	4.04871	5.81398	0	0	0	4.9731	0	0	2.9415	0	1.72743	0	3.23912	4.95811	0	0	4.40846	0	0.735603	5.70919	3.52113	4.98412	4.01777	3.46451	3.47256
3	46097423	46117423	Breast_SE_1086_2	4.09527	4.84484	5.30319	5.00378	4.09503	4.89208	4.54171	3.08272	3.38037	3.74983	4.33691	0	4.15022	0	0	0	6.50174	0	6.34381	3.75933	5.09196	1.6832	0.181717	4.25858	0	0	4.90794	0.470799	5.16718	0.776919	4.20313	0	3.00234	5.59409	3.3375	3.16125	2.30454	0.984095	2.91306	1.43815	2.62017	2.58622	3.05729
3	48343708	48363708	Breast_SE_1094_4	0	0	0	0	0	3.11268	0.232725	3.51004	0	0	3.94617	0	0	5.68889	0	0	0	0	5.00471	4.6256	0	0	0	0	0	0	0	0	0	0	0	5.18882	0	0	0	2.59075	0	6.23873	0.90252	2.5979	0	0	5.50542
3	48407794	48427794	Breast_SE_1095_2	3.83265	2.25881	3.83967	3.99839	1.19784	3.04218	3.32535	1.65883	4.08183	3.76683	3.3326	0	0	4.37053	5.23306	2.71065	0	0.0221835	0	3.29087	1.02507	3.75861	5.4515	0	2.83532	5.54614	3.63292	1.48657	0	0	4.67701	4.05113	5.29948	0	3.57382	1.94789	2.79416	4.9669	0	1.97491	1.80234	0	2.90352
3	49349048	49369048	Breast_SE_1100_3	5.31383	4.98333	4.87385	5.44886	4.72551	5.01433	5.42951	5.1432	4.72278	4.98997	5.20001	5.74311	5.82866	0	5.63583	0	6.15083	2.66032	5.45589	4.67873	4.55145	2.96586	5.42808	5.64101	5.01982	5.46109	0	3.94945	6.40767	4.96277	4.74539	0.311487	4.34856	5.65732	5.95844	0	2.89672	0	3.68474	3.73183	3.28096	3.07857	1.94937
3	50123245	50143245	Breast_SE_1104_2	0	0	0	0	4.19858	4.56866	3.66906	2.96333	0	3.31164	3.69972	0	0	6.53632	4.00777	0	0	3.54613	2.84757	4.33547	2.3768	2.04857	1.56054	0	2.92871	0	4.92807	3.5045	0	0	5.71723	6.73609	0	0	1.82705	1.12063	0.293468	5.09146	3.35313	2.61503	0.275443	0.722512	3.32803
3	50143245	50163245	Breast_SE_1104_3	3.55638	2.73686	3.71465	4.09637	6.3697	5.37844	5.95569	4.79455	3.05641	5.49734	4.66113	5.84115	0.770503	7.74202	5.39928	6.13071	4.21431	4.60921	6.44048	6.77623	4.31627	4.64816	6.79099	0	6.14207	6.73723	6.86156	3.48657	1.41842	4.04589	6.54583	7.95014	0	4.42378	5.6744	5.02962	3.25587	7.00098	4.26057	5.19544	4.22506	2.84733	5.55
3	50589211	50609211	Breast_SE_1106_4	5.64775	5.28622	5.23431	5.55484	7.38352	7.44622	6.17648	6.88159	4.94899	5.94796	7.00377	0	0	7.92381	5.11665	6.85118	4.14355	2.98378	6.23811	7.33509	4.46317	3.08488	4.86572	4.45844	1.39151	3.70993	6.8403	5.35192	1.77002	4.1552	6.04254	7.46173	4.85708	4.45814	5.05024	6.03609	1.03864	7.99971	2.23304	5.76347	4.73871	3.70261	6.62557
3	52028126	52048126	Breast_SE_1109_6	5.4477	2.00653	5.23013	4.71301	3.9534	3.73154	2.7424	3.3021	4.19562	4.68933	0.560325	5.32387	6.67551	0.134622	1.17241	0	5.17664	2.88392	3.10339	0	2.91424	5.11545	6.99371	5.93076	6.6701	6.68933	0	4.62854	6.31625	4.45596	3.17159	1.47772	5.61429	5.0507	6.47735	0	4.01101	0	4.97122	3.11498	5.29145	3.06095	0.737382
3	52208126	52228126	Breast_SE_1109_15	3.31903	2.75529	3.19682	4.28463	6.34369	5.64743	4.54406	3.7571	3.71411	4.50129	5.74333	0	2.80911	6.46798	4.10591	3.33322	2.32654	1.418	0.361521	5.94094	3.45168	1.93271	2.83471	0	0.749415	0	2.54359	0.0628787	5.14359	0	5.13011	5.07758	2.90395	3.63795	3.42315	3.73471	0.691333	6.14368	0	4.36747	3.54281	0	3.51206
3	55154220	55174220	Breast_SE_1114_2	3.2195	0	3.19726	0	0	0	0	0	0	0	3.08274	5.29732	2.6479	0	0	0	6.26457	0	0	1.61642	3.08809	0	0	5.56566	0	0	0	3.64466	0	0	1.38012	0	0	4.58949	5.53203	0	0	0	1.96094	0.521666	1.70682	2.13219	0
3	55476977	55496977	Breast_SE_1115_2	4.43531	2.75454	3.72264	4.34587	2.65631	3.53375	4.27324	5.66028	3.16152	4.37446	6.39982	5.60851	6.3589	0	4.96516	0	7.57525	3.34841	2.8549	5.7864	4.75384	3.77908	5.95648	7.30652	4.32225	4.08309	0.659212	5.74373	2.74223	5.18316	3.29481	0	0.823825	5.67458	5.91941	0	3.86225	0	0	4.20486	1.91467	2.47204	3.87317
3	57940015	57960015	Breast_SE_1120_1	5.36826	4.74425	5.09237	4.44057	5.15751	3.60314	2.66317	3.82878	4.19247	4.57219	3.89188	0	0	0	3.61577	0	4.69532	0	4.36294	0.85948	4.086	3.46499	3.6114	3.98572	0	0	0.17886	0.602719	5.1456	2.52989	3.96098	4.24224	6.02552	5.94821	3.37718	0	2.24324	2.56239	4.43755	2.37134	4.3286	3.37479	0.497499
3	57960015	57980015	Breast_SE_1120_2	3.85968	1.94702	4.23743	3.68079	2.93443	3.47719	0.86727	3.86766	3.11824	2.04621	3.39389	1.89097	4.72383	0	2.39743	0	4.61677	2.90327	4.73292	0	3.49746	4.22364	6.35427	5.37337	5.11033	2.84809	0.394693	1.41935	7.42388	4.6524	3.71552	4.73429	2.85902	6.37268	5.7328	0	3.68627	0	3.81697	2.46329	1.80558	2.3287	0
3	58100015	58120015	Breast_SE_1120_9	4.67562	3.76141	3.70403	4.01036	5.25411	4.93255	4.41375	5.45476	4.20522	5.04386	3.8014	2.02361	1.67036	5.46432	3.94391	4.67201	0	0	4.59553	5.97891	3.88898	1.80694	2.19152	0	0	0	3.01079	0	0.1808	0	4.77163	4.22497	4.44592	1.74839	0	4.67742	1.14369	5.34922	3.9127	4.73415	4.4742	0	5.06172
3	58558945	58578945	Breast_SE_1123_1	2.72211	2.13061	3.89223	5.36156	1.84664	0	0	0	5.09602	0	0	0	6.32403	0	3.19917	0	0	0	0	0	2.06473	0.600628	0	4.15777	0.188426	0	0	3.82777	5.23053	0	1.52658	0	5.84204	0	4.64182	0	0	0	2.25731	0	3.29919	2.43929	0
3	61550239	61570239	Breast_SE_1127_1	3.89754	3.85903	3.99076	3.54427	4.39872	2.87581	4.51659	4.96742	3.79794	3.99563	4.69583	6.04581	4.7322	3.35301	6.09541	4.07162	5.60096	0	0	2.79136	5.03218	2.23655	5.15279	5.87341	5.37809	5.23902	4.28336	5.70104	5.97169	4.53298	2.4611	0	0	5.48069	5.859	0	2.86068	2.04992	1.74283	3.29698	2.88938	4.22038	1.436
3	64141436	64161436	Breast_SE_1143_3	1.12192	1.21349	1.74397	3.22393	2.51906	3.9916	0.132777	3.2027	2.06934	3.26146	3.77616	5.17519	0	5.09461	0	0	0	0	5.37761	4.6224	0	0	0	0	0	0.758859	3.05239	2.52329	0	0	2.56078	4.8824	4.41856	4.47054	2.43575	0.743079	0	5.65991	3.19488	4.45577	2.93914	3.54401	4.8393
3	64161436	64181436	Breast_SE_1143_4	2.1344	3.54477	2.38333	3.11186	0	0.936259	0	0.674654	3.8617	3.17113	0	4.98832	0	0	0	0	0.887842	0	5.63727	3.91859	0	1.65451	2.49104	1.68517	0	3.0808	0	1.46066	3.81732	0	2.87312	3.89461	5.81794	5.6105	3.21085	0.643811	2.70763	5.00572	2.87603	2.06502	2.49827	2.11538	3.32302
3	64181436	64201436	Breast_SE_1143_5	2.57338	1.59026	3.04489	0	0	2.06922	0	1.34061	2.06331	2.50699	0	6.53522	2.01863	0	0	0	4.54746	0	6.05758	2.08587	1.8128	1.62487	3.55222	5.00454	0	3.30557	0	4.55351	4.9194	3.15956	0.758085	3.52042	0	4.20576	4.6265	0	2.72746	3.06752	2.89221	2.35158	3.04679	2.17772	0
3	65941809	65961809	Breast_SE_1147_4	3.91447	3.66616	3.91998	3.69377	4.60205	3.55127	1.75019	3.66813	4.48391	1.57286	3.92141	0	0	2.34092	1.11004	2.58289	1.98971	0	4.4379	4.47124	2.14324	0	0	0.0777223	0	0	4.50922	0	5.664	0	3.92928	4.71079	5.52033	0	1.1559	4.7571	0	4.9528	3.67725	4.19854	4.43741	1.24322	3.61972
3	66430852	66450852	Breast_SE_1150_4	3.77149	3.1381	4.08375	2.43301	5.30973	3.81288	3.47021	4.93022	2.2577	3.74923	3.98857	0	0	3.68209	0	3.1107	4.46599	0	5.58895	5.319	3.45656	2.29434	4.95083	3.90116	0	0	0	0.511079	4.47875	2.78739	3.92779	0	3.96994	1.79557	5.34217	2.72091	1.31911	4.70052	4.76005	4.76733	4.55447	4.23294	3.17127
3	72718460	72738460	Breast_SE_1163_1	2.66157	2.92195	0	1.69856	2.28906	2.22438	1.22868	5.16636	0	2.78733	5.47134	0	0	5.44868	0	0	0	0.815315	4.95277	4.01547	2.95899	0	0	0	0	0	3.50592	0	0	0	3.38311	4.27167	3.93518	2.86227	0	2.87344	0	6.02	2.07202	4.00648	3.64125	0	5.13522
3	72738460	72758460	Breast_SE_1163_2	1.17252	0	0	1.96329	1.17296	3.45481	2.22294	5.26092	0	0.123971	2.45038	0	0	5.51069	0	0	0	0	6.07371	5.10401	0.979824	0	0	0	0	0	3.19965	0	0	0	2.36429	5.04113	0.275327	0	0	4.10544	0	6.34302	1.76666	3.68128	2.9132	0	5.72741
3	98959857	98979857	Breast_SE_1174_2	0	0	1.61502	0	0	0	0	0	0	0	0	5.53153	4.29645	0	0	0	4.30543	0	4.12663	0	0	3.91081	5.44912	4.02758	2.31525	0	0	4.48382	6.51921	3.38546	0	0	0.287592	6.01443	0.741692	0	4.72224	0	0	0	0	0.376406	0
3	99623271	99643271	Breast_SE_1175_1	5.39638	3.5016	4.77535	2.3122	0.79885	1.42526	0	2.1937	1.55681	3.13304	0	2.71376	4.67689	0	0	0	3.8917	0	0	0	3.14913	2.42033	3.6969	4.87115	2.79882	0	0	3.10744	4.97702	1.27666	0	0	6.0696	4.09345	4.72934	0	2.30741	0	2.39623	0	0.584023	1.21223	0
3	100034151	100054151	Breast_SE_1177_2	4.84921	3.64895	4.753	2.62622	2.2668	3.0212	0	3.23642	3.84739	4.39414	3.33898	4.6561	1.73003	0	0	0	3.51696	0	6.7807	2.89065	4.04162	3.4652	3.78671	4.06504	0	0.860432	0	1.80282	5.43223	3.13173	3.33375	0	0	5.82451	0	0	3.31857	0.613166	1.90008	1.90335	0	1.55416	0
3	100507941	100527941	Breast_SE_1178_2	4.37958	3.44027	3.73294	2.6494	2.89749	4.12815	3.55307	4.65899	2.4324	5.05652	3.10663	2.0528	0	0	0	2.51769	2.40186	0	6.54518	3.20152	2.02453	1.46594	1.3386	3.88462	0	0	0	4.22675	0	0	4.89166	5.99451	4.0211	6.03276	0.401305	0	1.30421	2.70148	2.1165	4.11584	3.634	1.47156	2.13922
3	101934817	101954817	Breast_SE_1181_3	4.08774	1.99491	4.21401	3.62057	0.724597	1.00051	0	1.86278	2.28944	3.09104	0	4.81431	0	0	0	0	2.2985	0	5.73403	0	0	1.56443	1.16969	2.14154	0	0	0	4.1679	6.18986	0	3.4006	0	0.771939	5.54235	1.20871	0	2.8854	2.78813	0	0.291051	2.68676	0.40107	1.05231
3	102170280	102190280	Breast_SE_1183_2	3.86271	0.30764	2.74448	0	0	1.54617	0	3.20013	0	3.82795	4.77483	0	0	0	0	0	0	0	7.61296	4.53386	0	2.40347	0	4.01797	0	0	3.58224	0	3.47432	0	5.59607	0.518767	4.97637	0	0	0	2.76694	4.40112	1.54707	1.48758	2.20177	0.547488	3.43679
3	107210262	107230262	Breast_SE_1187_2	1.48097	0	1.69419	0	0	0	0	0	0	0.255167	0	5.65683	4.23903	0	0	0	3.85121	0	0.848021	0	3.86272	1.28998	3.86837	4.70142	0	3.10508	0	4.40998	4.51885	0.397205	0	0	0	4.43076	4.02891	0	3.456	0	1.51746	0	0	0.968501	0
3	107980578	108000578	Breast_SE_1189_4	3.70174	3.18028	2.99507	4.4075	2.05871	3.57261	3.35533	3.05245	2.60615	5.53621	3.23334	3.34219	0	0	2.0795	5.63284	3.98834	0	6.92503	5.37856	3.26598	0.141021	0.990649	0	0	1.90654	5.06221	1.79825	2.49936	0.461576	3.94128	1.97618	0	5.91148	2.5484	2.31013	1.22365	4.25525	2.95865	4.69189	4.23789	2.83191	2.06975
3	112641339	112661339	Breast_SE_1195_3	3.87778	1.98481	4.58557	0.597366	1.16475	1.82463	0	1.74752	4.02287	1.58213	3.98111	6.01388	4.53822	0	0	0	0	0	3.4631	0.907823	5.22171	3.29229	3.30618	6.62399	0	1.68899	0	2.45505	5.11407	1.10445	3.89828	0	0	5.01618	3.63239	0	3.4402	0	1.44063	0	0.516243	1.76718	0
3	113204933	113224933	Breast_SE_1197_2	4.35118	5.37316	5.05003	5.15421	5.99949	3.37166	4.2547	3.68838	4.09775	3.34523	2.17051	2.65587	0	5.71435	1.95173	5.78077	0	0	0.0381494	1.86234	1.50284	3.04093	2.35997	5.12018	0	0	0	3.9583	2.63089	0.198318	5.49397	0	7.53377	0	3.88337	0	2.39217	3.85597	4.57764	0.178361	3.81064	4.65926	3.91897
3	113528245	113548245	Breast_SE_1198_1	0	0.991033	0	3.6137	2.05437	5.08945	4.96569	4.69527	1.51125	2.28254	4.71813	0	0	5.12086	0	0	0	0	6.33251	5.90092	0	0	0	0	0	0	6.41235	0	0	0	2.56585	6.61606	0	2.12861	0	5.472	0	5.87485	0.33748	4.06525	2.03141	0	5.10803
3	119286805	119306805	Breast_SE_1205_1	5.16795	3.77432	5.13421	5.34123	4.24102	4.26285	3.90373	3.92625	4.87799	5.04639	0	3.96318	0	0	0	5.02204	5.08816	0	0	0	5.65871	2.8235	3.175	6.0065	0	0.372461	0	4.79218	4.03334	0	4.26881	0	4.90075	5.83286	4.5606	0	2.61647	0	4.61115	1.39189	2.35863	3.27021	0
3	120434048	120454048	Breast_SE_1208_2	4.23571	4.35908	4.9958	4.97453	2.97128	3.61956	3.54636	5.04698	3.50788	4.52182	4.71026	6.10629	5.69376	0	4.03991	4.13337	4.0255	4.31972	4.82336	5.97179	5.39444	2.74314	2.61553	6.39728	4.86686	0	0	5.63368	5.91436	6.16713	4.83363	0	3.7392	5.68612	5.11968	0	2.6635	1.67605	3.99117	3.26056	4.25296	4.17074	0
3	123607939	123627939	Breast_SE_1216_3	4.74447	0	3.62212	4.69448	4.13903	3.05736	1.94445	3.38128	4.15526	3.60348	0	0	0	0	1.8659	0.323361	0	0	6.40419	1.94471	3.46346	3.07416	1.69764	0	0	0	3.17368	0	0	0	2.35317	2.97118	7.2002	4.37034	0	0	2.27703	3.66159	3.87438	0.805406	1.78726	0.529712	3.67725
3	123727939	123747939	Breast_SE_1216_9	1.31254	0	1.00461	0	0	1.12399	0	0.717655	0	0	0	0	4.86552	0	4.08718	0	3.25334	0	0	0	3.99478	2.66558	4.57903	6.14637	3.85721	0	0	2.06232	5.60762	0	0	0	0	0.709361	3.91265	0	2.75808	0	1.30544	2.88015	0	1.34582	0
3	123747939	123767939	Breast_SE_1216_10	4.04211	0	1.1304	0	0	0.443342	0	0.571873	0	0	0	0	4.9509	1.47636	6.87452	0	2.95508	0	5.07079	3.59822	6.10908	1.99199	0	3.92322	0	0	0	2.701	3.95112	0	0	0	0	4.15486	1.93544	0	0.582106	0	3.70899	0	0.420898	0	0
3	123807939	123827939	Breast_SE_1216_13	4.52127	0	3.17608	0	0	1.04582	0	1.23365	0	3.43463	0	0	0	0	3.72479	0	3.71659	0	6.67178	0	4.76944	2.89361	4.39757	4.15816	0	0	0	3.36491	4.23387	0	0	0	0	2.77464	3.93364	0	2.64076	0	4.94203	0	2.84425	1.11002	0
3	124765472	124785472	Breast_SE_1217_2	5.025	5.2235	5.09801	1.41911	4.03245	4.62225	4.16578	4.74573	2.839	4.76438	5.92806	2.23673	0	4.55601	3.61218	5.76624	2.97521	0	0	6.73199	5.81568	1.04255	0	6.22874	0	0	3.37624	6.43157	2.60943	0	5.15156	2.68944	2.90504	0	1.64015	0.984777	0	5.32835	3.98365	2.52113	2.58337	4.21111	0.549963
3	125036837	125056837	Breast_SE_1218_4	4.05043	3.63066	4.70199	4.08004	3.66045	4.2965	3.38633	3.84644	3.26968	2.69574	4.00521	4.15768	2.17032	0	2.8467	0	3.01494	1.34696	4.42747	4.50154	5.1529	3.21504	3.53579	5.40722	1.81983	0	0	4.82149	4.62494	3.89117	0	0	0	0	4.75561	0	2.77926	0	4.73792	1.89217	2.33271	4.33752	0
3	125116837	125136837	Breast_SE_1218_8	3.77941	3.25	4.13691	4.63312	3.00982	3.28524	1.34068	3.66187	3.52277	4.7671	6.29717	5.70809	0.963662	0	2.50667	1.97337	3.16887	0	6.17892	3.15087	5.13792	2.42879	2.26617	6.12677	0	0	0	5.67148	4.10004	0.52116	4.32854	0	0	4.83272	4.67642	0	1.60794	2.98662	4.03964	0.864945	3.16877	3.68264	0
3	125136837	125156837	Breast_SE_1218_9	4.46251	4.13741	4.29704	4.45989	3.97657	4.48646	3.95685	4.17568	4.03894	4.96853	6.33546	2.82082	4.34628	0	4.23515	3.93146	0.661027	0	0.613064	1.02148	3.31248	2.40283	3.10502	6.4234	0	0	0	4.1828	5.51574	3.9697	3.14621	0	0	0	4.16538	0	1.58253	0	1.77174	0	0	3.59789	0.790892
3	126896629	126916629	Breast_SE_1221_9	3.52286	0.687216	2.81607	1.4701	1.57089	3.56248	0	0	0.730747	3.82547	0	0	2.88949	0	1.31348	0	5.62341	2.56923	5.14717	0	3.93063	3.58135	5.38593	4.67275	4.4475	0	0	3.67176	6.44706	2.39755	4.28384	0	0	4.56143	6.88418	0	2.97563	0	4.14725	3.71067	3.86131	2.75301	0
3	126996629	127016629	Breast_SE_1221_14	4.81803	3.42212	4.94877	4.80527	4.36418	5.06588	4.48762	4.84423	2.87281	6.20237	4.43077	0	1.83632	3.75032	6.45688	6.34636	3.62857	3.78204	3.12807	0	5.60709	4.30509	6.93189	6.6164	6.07839	5.38091	3.36658	3.5415	4.50368	0	7.19708	3.53756	3.7207	0.996163	5.34687	0.103438	3.62881	0	0	0	0	5.50436	0.843127
3	127056629	127076629	Breast_SE_1221_17	0.695261	0	3.58455	2.36803	2.23699	0	2.43604	0	0	4.50274	4.81553	0	0	1.88182	0	4.44339	0	0	5.5384	3.10236	5.92161	2.99529	3.89458	0	0	2.78524	5.8877	4.38627	0	0	3.11219	0	0	4.51573	0	0	1.96053	0	3.57128	1.88523	0	3.27594	0
3	127732191	127752191	Breast_SE_1223_5	3.95274	3.32391	4.4163	4.17767	2.58043	4.39428	2.36106	2.9086	4.28313	0.926256	0	0	0	3.28061	2.1464	0	5.42709	0	3.72554	0	0	1.6394	0.742512	5.34335	3.61968	0	2.65739	1.84016	5.54118	2.11094	0.742156	7.11852	0	5.05117	5.16266	0	2.12416	3.1107	3.9137	4.77774	2.97964	4.69916	1.4619
3	127772191	127792191	Breast_SE_1223_7	3.90981	0	2.66415	3.50708	2.07971	3.73788	1.26204	2.59954	3.01192	0	4.55404	0	0	4.31705	0	0	4.63512	0	2.81941	0	2.17851	0.370923	0	7.11452	2.58638	0	2.52945	4.04533	4.09927	2.95062	2.28903	6.5439	0	2.63197	4.47603	0	0	2.69544	3.98713	5.22946	2.72113	4.59847	1.92397
3	127812191	127832191	Breast_SE_1223_9	4.59277	2.79982	4.54084	5.24268	3.93049	5.2368	3.6979	3.10603	4.44694	0	6.74236	0	4.20442	3.52473	0	5.84637	2.47042	0	6.80901	4.4764	3.36801	2.43756	2.9366	5.56519	4.80995	0	5.24654	2.57734	4.84318	5.03547	5.5605	7.24342	1.56141	5.61429	4.52427	1.49521	2.30864	2.82366	3.50431	5.32514	4.52502	3.44594	3.86026
3	128327121	128347121	Breast_SE_1225_5	0	0	0	0	0.33988	2.93854	2.47919	4.74159	0	1.49897	2.72464	0	0	6.42731	0.269655	1.34691	0	0	5.7102	5.38939	0	1.85828	1.62947	0	0	0	4.66668	0	2.2638	0	2.36084	7.01819	0	0	1.72739	3.14808	1.39709	5.73969	4.12326	4.6865	0	1.02803	4.12103
3	128367121	128387121	Breast_SE_1225_7	0	2.17318	0	0	2.95657	2.22462	0.455193	1.29057	0	1.44466	4.73366	0	0	5.61497	2.73223	0	0	0	3.89186	5.38639	5.5138	0	0	0	0	0	0.30153	1.33108	0	0	2.9606	4.77881	0	0	1.75055	0	0	3.50646	2.79702	3.0262	1.4081	3.10227	2.05377
3	128427121	128447121	Breast_SE_1225_10	0	0	0	0	4.61174	3.70467	0.492343	2.70504	0	0	6.1229	0	0	6.4395	0.072751	0	0	3.70492	2.44912	3.26228	4.96505	0	0	0	0	0	6.0505	0	0	0	3.56803	5.79433	0	0.661298	0	0	0	4.75036	0	3.40821	0	0	0.900001
3	128471159	128491159	Breast_SE_1226_1	2.26547	0.592587	0.520414	0	5.92593	4.65091	4.9724	5.53555	1.1309	1.69926	7.21356	5.56444	3.28217	7.90352	6.68052	0	0	6.51904	0	6.40045	6.5664	0.472635	0	6.76418	0	1.03928	5.58201	4.36495	4.7794	5.45484	4.24473	5.20067	5.13739	5.48198	6.73602	4.13148	2.23964	0	0	2.57293	0	1.7781	4.0653
3	129466676	129486676	Breast_SE_1231_5	3.98295	3.70252	3.6269	3.94995	5.55338	3.38051	3.38094	2.26709	3.83782	4.69894	3.79987	2.48436	0	4.22991	0	4.46284	4.1645	0	5.10834	4.64032	5.59567	1.78003	2.45716	0	0	0.246092	5.39752	3.17976	0	0	3.50965	0	3.75569	4.96945	0	3.74569	1.48397	2.46574	3.53413	3.94599	3.55287	3.13338	3.67751
3	129486676	129506676	Breast_SE_1231_6	4.70415	4.21263	4.55871	3.43486	5.62498	4.7702	4.05113	3.64362	4.22264	5.32349	3.83698	1.94967	0	4.89806	1.94001	4.88624	5.80214	0	4.35685	3.82946	5.49898	1.68253	0	3.09066	0	0	6.77725	4.09302	3.35169	0	2.08058	4.25908	0.508077	5.15533	2.80845	3.51534	0.94567	3.19638	4.00445	5.39428	3.19909	4.08901	3.43368
3	129546676	129566676	Breast_SE_1231_9	2.67052	1.45384	3.3884	2.48547	5.36114	4.49466	3.9187	3.30541	2.72425	4.21646	4.40046	0	0	3.68806	4.84663	2.69953	6.6076	0	0	0	5.17576	0.972817	0	5.46319	0	0	4.7477	5.87277	3.99909	4.9429	4.36617	4.02963	0	0.82851	3.68621	0.463859	0.919284	0	2.03989	1.72363	1.98781	4.37507	2.30028
3	129586676	129606676	Breast_SE_1231_11	6.4699	6.05131	6.71342	6.1815	6.70905	6.97318	6.61956	6.30133	5.97529	6.30432	4.95057	0	0	5.47058	7.65975	7.40483	6.27877	3.12387	0	5.8758	4.44515	2.03731	0	6.93271	0	0	6.37353	7.7077	6.05752	4.04786	5.28649	3.47584	0	4.88073	3.74031	2.25375	1.50389	0	0	4.80828	0	5.19629	2.69586
3	129606676	129626676	Breast_SE_1231_12	6.09333	5.62584	6.20834	5.82391	6.02574	6.51988	6.1709	5.95315	5.65084	5.88367	4.45544	0	1.09099	5.84107	7.74137	5.14562	5.39048	2.58321	3.21135	5.33077	4.82353	3.31997	0	6.18888	0	0.790945	5.69349	5.89895	5.8152	3.33215	4.08933	3.44829	0	3.54831	4.51856	3.46653	1.99008	4.07945	0	5.0443	1.00344	5.39162	4.19314
3	129646676	129666676	Breast_SE_1231_14	4.98762	3.2718	4.20116	4.46579	2.67667	0	0	1.86942	4.2524	4.5167	5.08594	0	0	0	3.84645	4.34201	0	0	6.11849	4.98261	5.26263	2.90599	1.54888	0	0	0	0	1.31654	0	1.05659	4.79494	3.44004	3.78333	5.08532	0	3.68514	2.45971	3.84536	2.40291	3.18652	3.24549	1.42389	2.49152
3	133443621	133463621	Breast_SE_1235_4	0	0	0	1.91084	1.77322	3.1624	1.51582	0	0.848145	0	2.01049	3.66544	0	3.48419	0	0	0	0	4.30626	2.39926	5.57503	0	0	0	0	0	6.18372	2.42808	0	0	3.64658	5.06037	0	1.81955	0	6.18199	0	5.61057	3.54199	3.666	2.69664	0.709529	2.54034
3	133944476	133964476	Breast_SE_1237_2	0	0.688335	0	0	0	3.65618	2.02156	3.95061	0	1.96455	0	4.86663	0	5.14893	0	2.60441	3.26478	0	5.22043	5.96332	0	0.53815	0	4.24155	0	0	0	4.53579	0	0	4.25401	5.21108	0	0.543541	2.98792	0	0	0	4.35661	0	1.84407	0.263626	0
3	134332924	134352924	Breast_SE_1238_4	4.70383	3.75206	4.66735	4.23813	3.75134	1.70346	3.16122	3.55562	3.14712	5.06746	6.15316	4.84293	3.60748	0	5.90795	5.42668	3.00908	1.54683	6.36461	6.37187	6.9627	2.91817	3.94637	5.15399	0	2.93563	5.77839	5.58285	3.30015	0	6.24662	4.02941	6.63734	5.8377	4.91857	4.07265	2.00901	5.81148	3.74326	4.92235	4.15981	2.89092	2.91959
3	136945870	136965870	Breast_SE_1243_2	1.9872	0	1.75687	0	0	0	0	0	0	0	1.77273	3.77618	0	0	0	0	4.55795	1.34664	4.09475	0	4.89872	2.76395	4.56029	0	0	4.72574	0	0	0.588534	0	0	0	0	5.30513	3.6608	0	3.60523	0	0.486175	0	0.332154	0.729894	0
3	136975934	136995934	Breast_SE_1244_1	3.454	2.78955	1.53667	2.45539	2.79985	0.0101812	2.1638	0	0	3.10167	0	4.21571	0	1.61852	0	0	4.20717	2.66018	4.93501	1.69112	3.34439	3.33385	5.46242	0	3.35044	5.77782	0	0	0	0	2.27582	0	0	4.31517	3.905	0	3.06484	0	3.08147	1.16374	1.27404	0	0
3	139293645	139313645	Breast_SE_1250_2	0	0	1.32884	0	0	0	0	0	0	0	0	5.84013	1.20355	0	0	0	6.47578	0	1.42632	0	5.88252	1.69739	2.36557	7.19619	0.453308	0	0	6.17453	7.30054	0	0	0	0	5.09174	6.88741	0	2.28721	0	3.1026	0	0	0	0
3	139530991	139550991	Breast_SE_1251_2	3.83901	2.69503	3.31002	4.86088	2.85854	2.08835	3.60303	4.24034	1.5147	5.06145	5.04628	3.1409	0	0	2.94739	4.38897	4.94534	0	5.81548	0	5.0124	3.80898	4.33919	5.19337	0	0	0	2.3621	0	0	5.41738	2.26904	6.81912	6.64741	0	0	2.81972	3.31626	4.66337	4.49827	3.47339	4.21337	0
3	141408729	141428729	Breast_SE_1253_5	5.6029	4.7009	5.41118	4.23477	4.89635	5.22714	4.52426	4.74204	5.37514	4.72367	0	3.35887	0	0	0.0477376	0	2.26022	0	5.65431	5.80046	5.13929	2.56787	4.11761	5.33315	2.94492	0	0	3.4838	0	2.60406	4.54884	3.62943	0	3.24906	4.9081	3.02702	2.87399	5.24874	4.45884	4.40871	4.24737	4.16168	3.98677
3	147391643	147411643	Breast_SE_1261_2	5.38125	6.28803	4.81955	0.621182	4.71014	0	4.35809	0	5.83662	5.80938	4.89733	5.88637	5.1965	4.84522	0	5.32833	6.56058	5.42823	0	2.24095	5.80325	0	0	4.28717	0	0	5.79877	6.74045	0	5.59629	5.40883	0	7.22946	5.35912	4.70736	0	0	0	0	0	0	0	0.0980475
3	149283236	149303236	Breast_SE_1264_2	4.26294	3.98922	1.84859	1.47006	2.53076	4.14584	4.67483	4.75559	3.00826	4.91744	3.96847	5.74459	1.76506	5.22804	4.43781	4.5467	4.5998	0	6.52498	5.9441	4.38031	0.441109	2.12504	1.56368	0	0.222242	5.06655	1.03838	4.41366	0	5.52187	6.30507	0.432654	5.98088	4.42536	0	2.36765	5.65652	0	2.63538	1.90175	0	5.17018
3	149383236	149403236	Breast_SE_1264_7	6.08633	4.75663	5.16858	5.56425	4.33014	3.1179	2.58139	4.68731	5.66587	6.09877	4.01769	5.48908	4.68301	4.0717	3.86234	3.44448	5.15806	0	7.09258	5.67391	6.02372	1.72613	1.17214	4.5073	0	0.244062	6.21255	3.19008	5.03652	0.845105	5.743	6.33004	7.82876	6.2943	3.84443	0	1.52931	5.50315	2.64955	4.00853	3.7141	1.42703	6.13696
3	149544129	149564129	Breast_SE_1265_4	6.10629	4.9958	3.86602	3.82894	3.47859	1.76571	0.0483455	3.44196	4.62885	4.60746	1.53779	4.06422	0	0	2.74558	0	6.33867	0	1.22326	5.22805	5.79618	3.13321	4.18181	4.4518	0	0	0	2.1537	2.44515	0	4.77607	0	3.74958	5.63345	0	0	2.85939	0	3.50525	3.46142	4.6856	3.45573	2.65797
3	149564129	149584129	Breast_SE_1265_5	6.04708	4.53896	4.03624	1.91337	2.81315	2.84725	1.53736	3.05566	3.0273	4.24151	2.76228	6.16203	4.01312	0	2.73591	0	7.10236	0	5.32947	5.06824	6.16087	3.66741	5.65699	5.17453	3.3495	1.40448	0	4.12827	6.41558	3.25069	4.4006	0	3.77545	5.8855	4.33972	0	3.76907	0	4.18457	2.99861	4.17542	3.94198	1.57925
3	150234163	150254163	Breast_SE_1271_2	4.0281	0.580224	3.00017	0	3.60652	1.95886	0	2.79625	2.44633	2.46936	4.03236	4.73097	0	0	0	1.37324	3.87099	0	5.53764	4.09397	6.66267	2.88759	0	0	0	0	3.15237	4.76319	1.68827	0	3.33853	2.71423	2.51187	5.50545	0	0	3.04786	3.96284	3.04078	3.16677	2.5271	1.8025	2.16325
3	151290953	151310953	Breast_SE_1276_1	2.67402	0	2.49017	4.69893	0	0	0	0	3.06757	3.20344	0	0	0	0	0	0	1.77387	0	5.35161	3.7512	5.25661	3.03553	4.2284	0	0	3.83349	5.75216	0.615025	3.27948	0	0	0	6.11104	5.59304	4.258	2.29344	2.55974	2.72308	2.44553	3.16402	3.46945	0.869654	0
3	155714403	155734403	Breast_SE_1279_2	2.7724	0	0.716109	3.47553	4.6531	1.79145	1.23386	3.12732	0.000229959	3.81701	0.218936	0	0	3.93226	0	1.5523	0	0	4.75474	5.14619	0	0	0	0	0	0	2.99943	0	0	0	2.54949	0	5.39884	0	0	4.06737	0	5.80104	0	1.09639	2.35145	0	5.37822
3	155734403	155754403	Breast_SE_1279_3	4.77731	1.48716	2.52888	4.96164	5.9298	3.44963	4.83081	3.42216	2.7715	4.76598	0	0	0	5.27907	4.25642	4.62612	0	0	0	5.18651	0	0	0	0	0	0	3.37013	0	3.25945	0	2.54714	0.508262	5.2041	0	0	1.85598	0	4.85234	0	3.33719	3.89761	2.04013	4.58965
3	157124554	157144554	Breast_SE_1282_4	5.40255	3.61634	5.16078	6.01378	3.31436	4.86193	3.82167	5.63564	4.87677	4.4108	1.34101	2.61946	6.13513	2.31879	0.417092	0	4.78586	0	3.89527	5.45515	5.04792	3.79914	6.26193	2.7183	4.99912	5.40006	0	3.87033	6.43396	2.03385	1.92691	5.41509	6.6995	6.37643	4.52525	0	3.87182	4.4862	4.20857	4.46532	4.75534	3.13061	0
3	158700868	158720868	Breast_SE_1283_4	4.08076	3.07257	3.84417	3.4585	1.79377	3.60599	0	3.13332	2.50807	4.78402	2.23464	2.56618	0	0	0	1.4965	3.36666	0	4.7847	1.88236	5.23013	1.53192	0	4.45542	0	0	1.54002	1.09007	5.13442	0.613288	3.66205	6.04897	0	6.02026	2.57408	0	1.32668	0	3.02668	2.46452	2.24034	2.95431	0
3	158720868	158740868	Breast_SE_1283_5	4.70811	3.57484	4.64477	6.17735	5.51238	4.68712	4.85999	4.30896	3.85669	6.13189	6.00397	3.53035	0	2.38928	3.46362	6.12382	4.03714	0	7.73777	6.73979	6.86596	1.95707	0	5.19154	0	0	4.45928	2.85948	3.40755	5.82987	6.91999	7.48875	4.6918	7.94602	2.9557	0	2.00936	0.794522	4.48912	4.55971	3.69901	3.91416	0
3	158740868	158760868	Breast_SE_1283_6	3.72181	1.89819	3.46039	4.92644	2.9398	2.2145	0	0	2.626	4.19677	4.15932	0	0	0	0	0.887114	0	0	6.57739	4.06857	5.90381	1.44964	0	0	0	0	2.43519	0	0	0	5.0457	6.33356	5.34347	6.95644	0	0	0	0	3.61207	2.33947	2.13746	2.47221	0
3	158760868	158780868	Breast_SE_1283_7	4.85873	2.43966	5.04793	5.90268	4.72821	3.68771	2.19977	3.17137	3.4497	6.27301	6.20138	0	0	0	0	4.21753	0	0	8.64689	6.87092	7.04393	2.80378	0	0.0796861	0	0	0	0	1.2913	0	6.54057	7.43924	6.13558	8.0414	0	0	2.50973	0	3.93382	2.61859	4.16824	3.14272	0
3	161370439	161390439	Breast_SE_1287_9	0	0	0	1.0985	0	4.53577	5.22782	4.0734	0	0	0	0	0	0	0	0	0	0	1.60796	3.59675	0	0	0	0	0	0	6.8808	0	0	0	3.13942	5.98942	4.76658	2.81536	0	1.93723	0	4.56388	0.236565	2.7482	1.07915	1.19467	0
3	161397342	161417342	Breast_SE_1288_2	1.43997	1.42837	2.63934	0	0	4.44356	3.59814	3.85758	0	2.99925	0	0	0	0	0	0	1.84715	0	6.90135	6.45653	3.35313	1.23244	0	0	0	0	7.65906	0	3.96368	0	2.47521	6.92277	5.73393	6.0767	3.15041	4.03626	1.3094	5.87753	1.89082	3.03915	2.16733	1.49496	0
3	169659024	169679024	Breast_SE_1292_4	0.0140845	3.47683	1.7381	0	0	3.14531	2.81504	2.42048	2.04339	4.56465	3.32431	0	4.19463	0	7.38128	0	0	4.35463	0	4.57721	0	0.569435	0	4.48689	3.02949	4.62294	5.77491	0	5.34988	2.9425	0	2.32639	0	2.73605	4.52734	3.55198	2.37801	4.77155	0	0	0	0.0462856	2.87064
3	170715427	170735427	Breast_SE_1297_3	0	0	0	0	0	0	0	0	0	0	0	5.16421	3.85558	0	0	0	4.11825	0	2.87755	0	4.48854	1.48416	3.84697	5.46011	0	0	0	2.85823	5.18352	0	0	0	0	3.32152	4.7566	0	2.82762	0	0.941007	0	1.56658	1.76011	0
3	170735427	170755427	Breast_SE_1297_4	1.5715	1.72741	0	0	0	0	0	0	0	0	0	5.52309	5.15441	0	0	0	5.24252	0	4.9394	3.55979	5.67438	2.32266	4.49642	6.17202	1.97393	1.30189	0	4.79633	6.29567	0.488626	3.49304	0	4.05931	4.0581	5.22679	0	3.65241	0	2.49093	1.69647	2.5908	2.1724	0
3	172127013	172147013	Breast_SE_1301_6	6.09079	5.54325	4.48435	5.22387	4.4626	4.97322	4.10227	3.84511	4.97275	4.82081	3.21467	3.87781	0	0	0.44068	0	5.41813	0	6.18283	3.67705	5.15011	3.64915	3.92349	4.50349	0	4.03603	0	0.272869	5.60006	3.69035	3.50863	2.44281	1.99713	4.69307	4.40012	1.0141	4.19742	0	3.85608	3.6864	3.53484	3.05065	0
3	172547047	172567047	Breast_SE_1302_4	3.85156	3.34642	4.13818	2.86068	3.52887	3.68965	3.44256	3.76207	2.60279	4.51543	0	0	0	0.818696	0	0	2.93993	0	6.97114	5.79388	2.19603	2.73635	0.152139	0	0	3.35982	3.07687	0.720132	3.35943	0	3.9365	2.02233	0	4.81832	0	0	2.01564	5.00541	0.921321	4.05184	3.72729	1.6961	2.01076
3	172627047	172647047	Breast_SE_1302_8	1.43993	0	0	3.05985	1.76468	0.907485	2.77314	1.86515	0	3.05136	0	3.39091	0	2.85722	0	0	0	0	5.14548	5.40372	0	0	0	0	0	0	3.58981	0	2.09506	2.29427	3.87769	5.96719	0	2.40067	2.86535	4.19217	0	5.68382	1.92612	3.59003	3.35279	2.24944	4.62008
3	172647047	172667047	Breast_SE_1302_9	3.45604	1.39589	0	4.54913	1.22946	1.82759	3.43687	1.97373	1.69811	3.04387	0	5.45875	1.92714	2.89428	0	0	0	0	5.12977	4.94177	4.14822	0	0	0.562184	0	0	3.34979	2.21656	3.24714	2.81545	2.78013	5.97008	0	1.21551	2.49257	0.971233	0.00897691	5.05257	1.17846	2.60822	2.64054	1.17315	3.36894
3	174854037	174874037	Breast_SE_1307_1	4.13568	1.5252	1.16482	2.06718	2.72996	1.31453	0	1.70287	1.77775	2.94292	1.44521	0	0	0	0	1.02587	0	0	5.30482	4.65974	2.87039	0	0	0	0	0	3.79095	0	0	0	3.0775	2.83486	5.44066	3.24697	0	6.71073	0	4.07857	0	0.0161598	0.318925	0	4.56718
3	177435494	177455494	Breast_SE_1316_2	3.08655	0.926176	3.66495	2.38273	0.416821	3.43961	0	1.28636	1.86536	2.53192	0.390531	1.37472	0	0	0	0	3.35864	0	6.40786	4.8043	4.68073	3.30183	4.08549	1.40525	0	3.13227	0	2.04568	0	0.35931	4.80094	0	0	5.86947	3.3866	0	3.47218	3.7821	2.61862	3.12561	2.75304	0.947193	0.603156
3	177510424	177530424	Breast_SE_1317_1	4.36863	0	3.69119	1.67575	1.35164	3.23174	0	3.92893	1.61711	1.52025	4.27587	0	0	2.6162	1.29253	0	3.90437	0	7.22558	6.58472	3.35304	2.23752	0	3.11735	0	0	0	4.28512	0	0	4.301	0	0	5.04543	0.979718	0	1.85487	6.33035	3.09471	2.66669	2.03878	3.00988	4.9144
3	177590424	177610424	Breast_SE_1317_5	5.55156	3.32715	4.53231	3.41962	2.74641	4.32001	3.42317	5.19236	3.34193	4.1385	5.83665	1.56176	0	3.98644	0.483577	3.84421	4.36522	0	8.51194	6.6812	5.38457	3.68552	4.97498	0	0.539227	4.9847	1.38517	2.27903	0	0	5.16072	0	4.70418	6.32795	3.74452	5.06858	4.21274	6.62557	2.53977	3.24918	2.86861	2.51988	5.83629
3	177610424	177630424	Breast_SE_1317_6	4.71405	0	4.06145	2.48254	1.20938	3.07883	2.29434	4.61173	3.08111	3.10245	4.57163	2.78479	0	1.83005	0	0	3.27902	0	7.36891	6.68561	5.05022	2.9184	0	0	0	0.175915	0	2.69803	0	0	4.96509	0	2.77319	5.20992	2.2131	0	2.62913	6.31852	2.04955	2.36884	2.46233	1.93597	5.41491
3	177803791	177823791	Breast_SE_1318_4	4.08383	0.720278	2.88217	0	0	2.28354	2.00731	3.98493	0.873553	3.04638	2.71769	0	0	0	0	0	4.4598	0	5.43366	5.70553	5.27855	3.3387	0.717862	1.60293	0	4.25778	0.435549	0.173961	0	3.59954	5.07766	0	0	5.20902	4.71526	0	3.7521	4.31714	2.27672	2.77814	1.42584	1.29082	0
3	177823791	177843791	Breast_SE_1318_5	4.82189	0.892977	1.87099	0	1.74066	3.56693	2.54165	0.489319	0	3.50919	3.06618	0	0	0	0	0	4.98087	0	7.02261	5.67747	5.23143	3.0962	3.37141	3.42534	0	3.9494	0	0	2.1051	3.83338	4.21946	0	0	6.25072	4.83498	0	3.94899	4.39857	3.79271	2.79997	3.01183	2.64978	0
3	183282717	183302717	Breast_SE_1321_3	4.3592	2.71308	1.97143	4.56338	4.34884	3.25338	2.17105	4.25745	3.044	4.67502	4.25999	3.90752	0	2.65624	0	0	4.65955	1.00352	6.57427	6.04464	5.00864	1.30821	1.8178	0	0	2.48316	3.59357	0	4.17829	1.92649	3.7561	4.36701	4.60094	4.58139	4.16252	0	2.00452	5.52104	2.52009	3.38345	3.93986	1.49447	0
3	184555222	184575222	Breast_SE_1329_2	7.19446	3.69836	6.30764	7.13493	5.91299	5.73905	6.31994	5.75296	5.7675	5.91707	6.59068	0	0	7.4854	2.7348	6.00273	5.39462	5.18933	4.94576	5.85021	6.42331	4.29581	5.41019	5.54575	2.73732	5.91887	6.41224	6.32202	0	4.61795	6.28348	7.54912	7.21069	5.99607	0	5.50644	3.35842	7.65018	4.23695	4.91814	5.1185	3.51278	3.71817
3	184575222	184595222	Breast_SE_1329_3	6.87145	1.95109	5.64816	5.26935	4.81914	3.28096	2.56881	3.65439	4.74251	5.85214	0	0	0	4.90491	1.57184	4.55239	0	0	0	0	3.49679	3.61544	0	0	0	0	0	3.33286	0	0	5.29099	4.01173	6.13265	0	0	0	0.128506	3.42132	4.41571	0	4.50521	3.87362	0.0941651
3	184635222	184655222	Breast_SE_1329_6	5.16494	0	3.6814	2.81415	2.43033	0	0.760093	0	0	4.16538	5.12769	0	0	4.06338	0	1.69327	0.702028	0	6.08052	0	2.94392	3.05745	1.33725	0	0	1.95542	0	0	0	0	5.58308	4.56836	5.24125	5.22481	0	0	1.35357	3.12584	4.62358	2.4506	3.56581	2.32232	1.16466
3	185313167	185333167	Breast_SE_1330_3	2.93932	1.65046	0.239754	5.89118	0.177355	0.830145	2.19402	0	3.63139	5.71556	0	0	0	0	0	4.58549	0	0	6.52785	3.76306	4.52804	0	0	0	0	0	0	0	0.713716	0	4.1076	0	4.8446	5.47271	0	0	1.85334	2.83186	0.785644	2.64034	3.34445	0	0
3	185717119	185737119	Breast_SE_1331_5	0	0	0	0	0	0	0	0	1.4072	0	0	4.6471	4.33758	0	2.54005	0	0	0	0	0	3.72754	3.81555	6.3406	3.5221	4.86227	4.14036	0	0	6.35385	1.49505	0	0	0	4.5389	5.49229	0	3.95997	0	0	0	2.47204	0.0619443	0
3	185817119	185837119	Breast_SE_1331_10	4.10739	1.4525	1.99204	6.08817	0	1.81349	3.77819	0	4.61394	0.211769	5.28046	5.92909	6.30359	0	6.25198	0	1.49869	6.7273	1.08035	0	6.46998	3.26367	5.48168	5.48726	6.01965	5.75092	1.85337	5.49664	6.29274	5.72822	4.94	0	4.87233	5.53155	5.31625	0	3.41544	0	0	1.40915	3.50043	1.04094	0
3	186098718	186118718	Breast_SE_1333_4	4.45455	3.07143	3.074	4.65305	2.43875	1.61128	0.430021	2.96677	2.74773	3.12636	3.17331	4.67183	4.78404	0	5.26663	0	5.23755	3.21123	0	0	4.86904	2.91207	4.90166	5.07622	4.6961	0	0	3.30665	5.71503	5.13895	2.95991	3.06063	5.10797	3.70246	5.0779	0	2.84711	2.75045	3.48321	0	2.7953	3.18972	0
3	186960959	186980959	Breast_SE_1336_3	4.98484	3.40985	3.14201	0.849108	3.1993	4.38817	4.51655	5.57387	2.5673	4.4371	3.6238	0	0	4.69056	0	0.318121	0	0	6.68424	6.46383	0	0	0	0	0	0	0	0	0	0	4.78557	6.17224	4.54587	3.18544	0	2.36833	0	5.96475	4.05397	4.53264	3.9735	1.93335	5.39669
3	187060959	187080959	Breast_SE_1336_8	4.59355	3.76404	2.88873	4.25354	2.34338	3.38621	2.38613	2.91573	3.94175	3.11571	2.93614	0	0	0	0	0	0	0	6.83624	4.76157	3.1259	0	2.03197	0	0	1.66536	3.74965	0	0	0	3.48322	4.09678	5.23034	5.51219	0	4.64423	0.966613	3.63961	3.44186	2.45719	2.00238	0	3.61876
3	187793244	187813244	Breast_SE_1338_5	4.75757	2.46904	1.17757	3.62492	4.89167	3.85958	4.64015	4.89831	0	3.57171	2.40752	0	0	4.01206	0	0	0	0	5.37042	5.19902	0	0	0	0	0	0	3.30911	0	0	0	2.98445	4.38355	5.86938	0.317705	0	5.07372	0	5.95558	3.87358	3.97645	3.88852	1.70611	4.6535
3	189263586	189283586	Breast_SE_1343_1	2.17798	0.192095	1.47948	0	0	0	0	0	0	0.187909	0	4.32459	0	0	0	0	3.56456	0	6.88971	2.69914	3.38053	2.35924	3.44424	0	0	4.43202	0	3.93116	1.56622	0	0.0936346	5.09492	5.77222	5.54906	3.26995	0	3.33177	1.9454	1.78057	0.72419	1.74155	1.02962	0
3	189283586	189303586	Breast_SE_1343_2	0	0	0	0	0	0	0	0	0	0	0	0.562839	0	1.44628	0	0	0	0	6.94859	2.63622	1.77218	0.603107	0	0	0	2.43538	1.41274	1.0815	0	0	0.276866	6.53251	6.08572	4.53215	2.32857	0	1.90155	4.3643	3.02793	1.77736	0.276769	0	0
3	189303586	189323586	Breast_SE_1343_3	3.30321	1.09701	0	0	0	2.27919	0	0	0	0	5.25363	3.51547	0	3.24778	0	0	1.13349	0	7.64709	5.28922	5.03454	2.26638	3.31088	0	0	4.57112	4.16627	3.78825	2.72342	0	0	7.16082	7.36912	5.09285	2.85903	3.72755	2.95064	4.95516	2.00524	2.20329	1.46482	0	0
3	189765375	189785375	Breast_SE_1344_2	2.96941	1.78699	2.47539	0.452414	2.6808	0.283853	0	0	0	2.32349	3.22847	2.53603	0	0.0638453	0	2.81967	2.61995	0	6.76018	2.75901	4.57509	0	0	0	0	0.539634	3.65907	2.8972	0	0	0	4.93531	4.9866	4.80464	0	5.21199	0	4.91375	0.648579	0	0.77527	0	4.38424
3	189825375	189845375	Breast_SE_1344_5	1.98356	0	0	0	0	0.602485	0	0	0	1.94545	5.11829	0.738799	0	0	0	0	0	0	7.79079	3.46394	3.49657	4.05081	5.07611	0	0	5.69519	3.00512	0	0	0	1.89386	0	0	5.54007	4.48202	0	4.24671	2.30201	3.05452	0	2.23429	0	2.67501
3	189905375	189925375	Breast_SE_1344_9	0	0	0	0	0	0	0	0	0	0	0	4.29497	0	0	0	0	0.27795	0	7.21829	0	0.957452	3.91688	5.18728	0	0	4.08278	0	0	2.81332	0	0	0	0	4.89497	2.45262	0	4.48543	0	0	0.245559	0	0	0
3	189925375	189945375	Breast_SE_1344_10	4.43187	1.03411	3.16604	2.39628	2.81623	2.9259	0	0.278174	0	2.60911	5.11303	4.96248	0	3.75256	0	1.26825	3.83944	0	8.21879	5.04641	4.23013	3.7589	4.84179	0	0	4.40035	2.53421	2.95624	3.29775	1.74962	3.06194	4.70035	0.562125	5.49094	4.52768	0	4.22174	3.48313	2.81952	2.81613	3.00873	0	0.356221
3	192586909	192606909	Breast_SE_1349_1	0	0	0	0	0	0	0	0	0	0	1.71422	0	0	0	0	0	0	0	5.23595	4.09615	2.86451	0	0	0	0	0	5.03253	0	0	0	0	5.48348	0	0	0	5.71897	0	4.47536	0	0	0	0	4.74787
3	192866496	192886496	Breast_SE_1350_2	0	2.56047	0	3.59163	0	0.915147	0	0	2.8106	1.33603	0	5.45604	5.17582	0	3.28596	0	2.64339	0	3.08524	3.50355	5.45286	0.925954	2.89998	5.2167	0.389401	0	5.60105	4.29945	3.70073	3.18558	2.63125	2.48772	0	5.82875	5.02917	2.83638	0.894546	3.54634	3.10684	4.33002	2.90691	2.27653	0
3	192886496	192906496	Breast_SE_1350_3	2.67286	3.45577	2.78216	3.65581	2.23337	3.71488	1.69139	0.64362	3.71122	3.70438	0	5.03872	3.92354	0	3.41686	0	3.72596	0	0	4.33461	4.87461	0.601677	0.490002	5.06886	0	0	5.14646	3.22211	4.40676	3.01635	3.2454	1.56229	0	5.83832	4.77774	3.4995	1.49003	4.28104	3.03855	4.86227	3.92803	1.63709	1.97817
3	193823071	193843071	Breast_SE_1352_4	3.77213	0.487137	3.58379	4.11344	4.36723	3.42259	1.97629	5.9329	3.27822	3.36289	5.75262	0	0	0	0	0	3.33029	0.678622	6.52121	5.16312	2.82173	2.7706	4.81776	0	0	4.30493	4.00469	0	0	0	3.97021	4.84682	1.16874	5.69582	4.39212	0	3.07107	4.85228	4.62341	5.819	4.71865	2.35776	2.48139
3	193843071	193863071	Breast_SE_1352_5	0	0	1.12561	0	0	0.0794097	0	3.74598	0	0	5.25805	0	0	0	0.858696	0.987422	3.69559	0	7.17047	5.55188	2.09427	0	1.32185	0	0	0	0	0	0	0	3.81476	0	0	4.52937	0	0	1.76519	2.80788	2.94112	2.75222	2.74448	0.694697	1.16705
3	193863071	193883071	Breast_SE_1352_6	3.9516	0	2.81922	4.39399	3.88192	3.7934	3.6786	5.16596	2.94674	3.22829	5.60992	0	3.77987	2.30746	2.01263	0.635657	5.25692	0	6.18722	4.98168	4.45354	3.23453	5.29292	0	2.93381	3.94121	5.10613	2.23366	4.43048	0	5.38292	4.05953	0	6.312	4.58052	0	3.11545	5.16633	3.42169	5.18441	4.62177	0.128924	2.86735
3	194091113	194111113	Breast_SE_1353_6	0	0	1.91409	4.05353	2.87655	3.68145	1.8807	4.15895	1.93819	0.71186	5.09876	0.701614	0	0	3.15169	5.50178	4.53347	0	5.8398	6.2006	3.65685	2.09261	1.37319	0	0	0	0.63568	2.40656	0	0	5.02769	4.11305	0	4.55984	4.40547	0	1.29086	2.26698	2.6799	3.91591	3.11355	0.868789	1.42428
3	194151113	194171113	Breast_SE_1353_9	4.66854	0	4.51617	5.27353	4.0257	4.05743	3.85232	5.17603	3.40804	3.09048	1.93878	0	0	5.87721	0.413902	0	0	0	6.14832	5.41039	1.32829	0	0	0	0	0	2.35217	0	0	0	4.44682	7.04136	6.90209	0	0	0	0	5.91236	3.7514	4.76307	3.92192	1.5756	4.27838
3	194264813	194284813	Breast_SE_1354_2	5.97895	3.76358	4.63503	5.48347	5.1982	5.67559	5.06392	5.81319	4.17959	4.56825	0.304082	4.89975	0	7.48078	4.73487	4.91098	5.38141	0	0	7.03211	5.86383	3.12246	1.9129	2.66544	0	0	1.97842	6.2279	2.4476	0	4.69939	6.32023	6.32783	3.22706	3.46233	1.48393	1.64911	7.22283	4.18354	4.75022	3.71659	4.39494	4.26732
3	195102110	195122110	Breast_SE_1357_6	0	0	1.58072	0.145173	0	2.60244	0	0	0	0	0	5.93543	1.98439	0	3.8051	0	2.62525	2.08596	3.01092	2.29926	3.7983	0.744223	0	5.9935	0	0	0	5.27083	6.3247	3.80581	2.60102	0	0	1.11714	5.9863	0	1.00701	0	0	0	0	2.86995	0
3	195142110	195162110	Breast_SE_1357_8	1.59493	3.15877	2.63995	1.88348	4.18441	4.91743	3.26112	1.85298	2.74605	2.04563	0	1.5937	0	3.77498	2.85186	0	0	0	0	5.28086	0	1.26993	0	5.7717	2.47099	0	0	3.41418	6.57746	0	2.84759	0	0	0	5.4938	0	2.20714	2.1732	3.30877	3.35934	2.00646	4.18906	3.23656
3	195242110	195262110	Breast_SE_1357_13	3.7834	3.17176	3.31806	4.00411	3.7118	4.63905	4.15988	4.03946	3.14104	3.13344	0	5.11189	3.77859	1.8437	6.02558	3.89792	3.899	1.65895	0	2.08364	4.6623	2.15588	3.60805	5.94311	3.6193	3.46318	3.04854	5.76812	5.4998	3.30829	2.42918	0	0	3.7794	5.86606	0	2.14272	0	0	0.430518	0	3.91838	1.06169
3	195858921	195878921	Breast_SE_1359_4	0.139475	1.03365	2.38481	4.93767	1.98589	3.11803	2.87228	2.88124	2.4258	1.50988	4.38768	0	6.52947	1.5668	3.83662	4.0369	1.98971	7.1365	0	0	2.82878	3.56554	5.16343	1.68426	4.42357	5.01008	3.01746	1.62009	5.1635	5.74731	4.55811	3.67228	0	5.42858	2.7716	1.27278	3.05987	0	0	2.91598	0	2.49503	1.81275
3	196120335	196140335	Breast_SE_1360_5	4.04478	0.816734	2.52567	5.21299	3.89277	3.59236	3.63699	4.80705	3.68821	3.67972	5.20329	0	0	3.60258	0	3.76265	0	1.89132	6.28824	4.79091	5.05372	3.44815	3.26391	0	0	2.73109	4.6023	0	0	0	4.91858	0	2.49916	2.81723	1.55794	4.64694	2.0088	5.16011	3.52183	0	0	0	4.02371
3	196140335	196160335	Breast_SE_1360_6	5.31528	2.48138	3.28777	6.4279	5.21022	4.27948	4.2362	5.71807	4.74527	4.39249	5.85851	0	0	5.87238	0	5.37072	0	0	6.27617	5.18789	5.22627	2.91181	2.82444	3.90432	2.2798	0	5.42019	0	4.05436	0	4.69453	0	1.52604	2.98083	0	6.16795	2.52381	6.32166	2.25177	0	0	0	3.69999
3	196329459	196349459	Breast_SE_1361_1	0	1.13544	0	6.20467	2.86613	0.130933	0	0	3.06031	0	4.2604	0	4.43818	0	0	0	2.08165	3.68211	0	0	3.55495	0	3.10837	1.21338	3.24654	2.89747	3.67122	0	5.78897	5.06687	0	0	0	4.66227	5.35887	0	0	0	0	0	0	1.11364	0
3	197521927	197541927	Breast_SE_1370_5	5.32411	0	4.50466	5.67649	3.5482	0	2.93612	2.7421	4.18026	4.2444	2.52502	0	0	1.47621	2.85885	1.52157	0	0	5.49373	5.31277	4.14614	1.98022	0	0	0	0	3.07143	0	0	0	4.97555	4.37352	5.82764	4.54137	0	0	1.36777	7.15195	1.35598	3.949	3.90637	0	3.92057
4	1025655	1045655	Breast_SE_1375_7	4.82486	3.53344	4.96811	2.74481	5.40728	4.07547	3.04171	4.86283	3.06538	3.55939	2.71035	7.78639	3.68226	1.00902	5.24718	2.48865	3.90444	4.27669	0	0	5.67687	3.41372	2.99068	7.06994	2.81015	2.65523	3.42191	4.58708	5.09288	4.91021	1.62431	0	2.92147	4.05012	4.99703	0	2.89462	0	0	4.10704	4.0613	3.77556	0
4	1190168	1210168	Breast_SE_1376_3	4.86566	5.45216	5.83725	4.54775	5.45037	6.36192	5.26759	6.22415	5.11663	5.71085	3.01032	6.58471	4.03438	5.30157	2.6224	2.83956	4.42407	1.54061	2.75561	3.76654	3.94844	1.89528	0	4.99631	0	3.02808	0.387553	6.10576	0	6.56679	3.80251	3.74897	2.30366	2.17432	6.31109	0	1.38104	5.29668	0	4.16537	0	5.2233	2.84363
4	1321560	1341560	Breast_SE_1377_3	4.20031	4.66036	4.61921	3.67945	3.59478	4.50466	4.28264	3.76028	3.47922	5.31122	5.89871	7.93992	8.75846	0	2.64674	0.182079	4.14417	2.30157	4.80362	3.36738	5.99112	3.54999	6.19558	3.8198	5.15492	4.95665	1.95525	0.958506	4.76484	3.95288	5.10962	0.080198	2.04075	5.91108	4.12636	0	3.00602	0	0	0	0	2.26746	1.32512
4	1738018	1758018	Breast_SE_1378_4	1.6515	1.88092	2.78633	3.40548	4.01066	5.69892	4.02524	1.92428	1.88868	3.9651	3.14659	0	0	3.43568	4.98152	4.36791	0	6.13176	0	0	2.99746	2.47038	4.55567	0	2.19159	6.92128	3.19169	2.61135	0	1.77266	5.1292	4.57367	0.205307	0	0	0	2.27535	0	0	0	3.04682	0	1.75828
4	1758018	1778018	Breast_SE_1378_5	1.46377	0	2.64813	3.31578	4.47446	6.39787	3.15456	0	0.872908	2.88785	5.1193	0	0	4.08438	6.67085	2.48873	0	6.84894	0	0.819132	3.63764	2.75623	4.06914	2.37745	0	5.95755	4.23831	3.74882	0	2.39286	6.00704	4.22361	0	0	0	3.04075	2.4674	0	0	0	0	1.95824	1.82502
4	1778018	1798018	Breast_SE_1378_6	0	0	2.32009	2.64155	4.34073	5.69763	2.90873	0.632471	0	1.5449	4.54048	0	0	3.42692	6.66474	2.62737	0	6.18431	0	3.13735	2.28694	1.94385	2.37348	3.10908	0	6.36808	4.48588	3.78648	0	0	5.20527	2.82638	0	0	0	3.27216	2.31975	0	0	0	0	1.68764	3.36777
4	2788675	2808675	Breast_SE_1386_2	6.40156	6.04742	6.25704	6.84293	6.02395	7.41916	6.73261	6.7399	5.931	7.02023	7.36475	0	0	5.7615	4.95462	6.28577	5.03394	4.71554	4.29386	5.81928	6.59082	3.18441	3.20748	3.26756	5.14933	6.53525	6.44066	7.59566	7.36656	7.37583	6.77667	5.06324	4.45013	5.84078	6.86914	1.49834	2.67067	1.88823	0.269552	6.02317	5.17459	5.05241	3.51617
4	3419758	3439758	Breast_SE_1389_2	0	0	0	2.94266	0	2.14252	2.82378	0	0.12395	2.18455	2.20059	0	5.37309	4.67715	4.59554	0	0	3.88263	0	2.20679	3.52445	2.81649	4.72143	2.50435	4.90798	3.8558	4.64578	3.54416	0	4.42224	3.96129	6.15339	0	0	5.68753	1.88062	2.83077	3.09201	0	2.36073	0	0	2.9097
4	3479758	3499758	Breast_SE_1389_5	0	0	0.3661	0	2.54152	2.84512	2.73386	0	0	2.71818	3.68956	0	0	0	2.96129	2.88754	0	4.86771	0	0	0	3.75505	5.50537	0	0	0	6.70915	1.49225	0	0	3.46159	7.34	0	3.31133	0	2.41524	3.22559	0	0	4.56271	1.90535	3.63356	0.0237191
4	5738101	5758101	Breast_SE_1393_3	4.11414	2.8035	4.19286	0.301968	1.8721	3.54532	1.60363	4.06893	1.37249	4.17271	0	5.91569	5.75094	0	0	0	3.10721	0	0	0	1.34254	0.630632	4.4234	4.92754	5.80126	3.40518	0	0.453236	6.24817	5.60831	0	0	0	0	6.43311	0	0.647101	0	0	1.07218	0	4.28928	0
4	6687139	6707139	Breast_SE_1396_3	4.5809	3.93753	4.64875	6.12745	5.59577	6.24439	5.39523	6.71847	5.30361	5.02724	6.32602	3.27771	4.06417	5.81018	3.56477	0.289351	0	1.26085	6.13978	5.88894	5.33934	2.31274	0	2.64481	0	2.94583	6.6802	4.61949	5.21524	0	5.02319	7.19376	7.35454	6.97115	3.59482	4.69769	0.763391	6.18799	1.76194	5.27035	3.31556	0.757519	5.38998
4	6747139	6767139	Breast_SE_1396_6	3.55315	2.36287	1.78681	0.0605245	0.234585	5.4251	3.36813	6.76392	1.70802	3.21962	6.17647	0	0	6.81099	0	3.61021	0	2.18915	4.60318	6.09016	5.42705	2.72201	3.29978	0	0	1.65807	3.39713	0	3.23901	0	4.93934	6.68879	2.91667	2.47563	1.50025	5.18856	1.95027	6.52548	1.87407	5.3197	4.26261	2.36233	4.51722
4	7202596	7222596	Breast_SE_1398_2	3.16594	3.10759	3.81669	0	3.11436	3.11879	2.30735	3.49755	1.59167	2.17015	4.11136	3.65957	0	0	3.37986	5.50574	5.00392	0	5.20497	4.40583	5.60392	3.30614	0.489962	5.64595	0	0.110368	4.54858	4.25271	5.23994	7.07674	5.57171	0.147958	0	7.16975	5.7352	0	2.49307	0	3.34185	0	1.64491	2.49931	0
4	7837214	7857214	Breast_SE_1400_6	4.7313	4.50734	4.70763	3.42338	2.72197	4.20316	2.9826	3.14024	3.94004	4.52416	1.89974	5.96881	6.43107	0	2.92942	3.30486	5.6016	0	0	0	4.80946	3.40967	4.47526	6.22137	5.11043	0.61416	1.77854	4.22111	7.15211	5.49476	0.306992	0	0	4.57121	5.87813	0	2.44537	0	5.00038	0.957478	5.13345	4.26919	0
4	8187919	8207919	Breast_SE_1401_3	5.73675	5.61157	5.67637	5.19651	5.41127	6.41116	6.26112	5.99784	5.54319	5.96127	3.8366	0	0	1.51309	4.22462	5.0743	4.29019	4.378	4.29441	2.71213	3.34032	4.38675	7.26717	4.54526	6.49837	5.18075	3.03312	0.0356519	5.90685	5.40984	5.88815	4.51845	0	4.55899	7.39767	0	3.97664	0	0	5.02581	3.43268	3.45982	3.57853
4	8523544	8543544	Breast_SE_1402_1	4.2443	1.65052	2.96632	3.51757	3.86345	4.70089	4.39702	5.1004	2.06203	5.32495	4.57726	0	0	1.25691	4.41579	5.69612	3.70958	0	4.77387	4.81852	4.11256	2.4114	0	0.315282	0	0	5.1035	1.26515	4.80072	5.17824	4.47513	3.63601	2.26684	4.75628	3.316	1.47557	1.48992	4.4991	0.604797	5.10092	4.23084	2.99943	2.58622
4	9999607	10019607	Breast_SE_1403_4	4.21801	4.14573	3.69129	3.70694	3.9449	4.63918	3.49864	4.89356	4.03589	4.52165	3.86413	0	0	3.88979	3.71535	4.1911	3.05128	0	6.98667	4.27742	3.36473	2.81695	4.34933	0	0	2.67115	0	0	0	0	3.76118	5.40975	2.87047	3.69634	4.37378	0	2.60692	2.47346	3.70261	4.84661	4.58679	2.626	0
4	10079607	10099607	Breast_SE_1403_8	4.96912	4.41798	4.51468	2.85137	4.0873	4.82393	4.5007	3.98677	3.78501	4.20707	3.6355	6.66405	6.43443	0	2.98843	0	4.98297	0	0	3.73524	3.63191	3.29203	5.22492	5.95491	4.84253	2.5301	0.76443	1.39208	7.0067	4.4231	2.32237	3.66527	1.23693	2.56825	5.90898	0	2.02173	0	0	0	0	2.82684	1.19248
4	16129594	16149594	Breast_SE_1415_2	1.76039	0.581872	0	0.626472	0	3.97315	2.01117	0	0	3.96448	0	0	0	3.72889	0	0	1.89268	0	6.22048	4.56778	2.36653	0	0	0	0	0	0	0	0	0	3.55204	5.85088	5.14498	3.83817	0	0	0	2.99178	2.97855	3.6168	3.9445	0	0.439881
4	24592389	24612389	Breast_SE_1419_2	2.50406	0	2.4284	2.9058	1.63806	2.54494	1.07701	4.35631	0	4.47397	3.24781	0	0	4.41938	1.52415	0	0	0	5.46235	5.2451	1.96226	0	0	0	0	0	4.09893	0	0	0	4.38159	5.20699	5.59845	4.38964	0	4.1829	0	5.58987	0	3.45001	1.76952	0	4.3338
4	37452006	37472006	Breast_SE_1426_2	0	0	0	3.757	0.744495	2.07911	1.71053	0	0	1.73016	0	0	0	0	0	0	0	0	5.92677	4.98584	0	0	0	0	0	0	2.92605	0	0	0	0	6.57662	0	0	0	6.56117	0	0.202617	0.0498522	2.10558	3.19758	0.66968	0
4	40183753	40203753	Breast_SE_1433_2	3.54593	5.19589	3.41536	4.40431	4.16525	6.31851	5.4216	5.71148	4.3794	2.00682	0	0	0	5.73376	0	0	0	0	6.63255	5.62538	0	1.73944	3.44383	0	0	3.20758	3.29531	0	0	0	3.90133	7.04008	0	0	0	5.67989	3.23055	7.42899	0	5.18335	0	0.181664	5.88061
4	40243753	40263753	Breast_SE_1433_5	0	1.57246	0	1.41733	0	4.23447	2.7901	0	0.567297	0	0	3.37519	0	1.87449	0	0	1.78333	0	5.42697	0	0	3.31085	5.78291	0	4.31203	4.81189	2.9638	0	0.85177	0.808608	0.600809	5.54783	0	3.77908	4.05003	1.2597	3.80068	1.71793	1.32546	4.34619	0.351381	0	2.88782
4	40441481	40461481	Breast_SE_1434_6	0	3.32041	0	2.28747	4.75124	4.20453	2.79547	6.17188	0	1.96591	0.648541	0	0	4.19674	0	0	0	0	5.55161	4.98977	0	0	0	0	0	0	4.02941	0	0	0	4.13212	5.65739	0	0	0	4.5225	0	6.34507	0	4.59085	2.84232	0	5.47364
4	40621481	40641481	Breast_SE_1434_15	5.27172	5.17601	3.99323	4.97749	6.27986	5.72597	4.77657	5.84388	4.31058	4.97734	5.93706	0	0	5.81797	5.42161	2.60506	3.08821	3.17022	6.81769	5.93418	5.79693	0	0	0	0	1.56306	5.94118	0.672562	1.89349	3.49739	5.12197	5.3592	3.98676	5.67501	2.87097	4.63641	0.891089	6.016	0	4.69084	4.23723	0	5.49447
4	40661481	40681481	Breast_SE_1434_17	2.28331	1.54936	2.32064	1.91581	2.01065	0	0	0	0.694226	3.40238	5.65318	0	0	1.0719	4.06795	0	3.56795	1.27267	6.30894	2.33315	4.6417	1.25005	0.958537	0	0	0	0.817073	0	3.87707	0	4.18914	0	0	5.23821	3.47872	0	1.41868	3.82175	0	0	0.948809	0	3.63198
4	41354218	41374218	Breast_SE_1437_4	5.66975	0.667668	1.22777	4.23282	2.49044	5.91126	4.88393	5.87149	2.03535	3.09134	5.91961	0	5.0718	5.89241	5.86478	5.42566	0	0.802845	6.34653	6.03638	5.56198	0	0	0	0	0.758301	0	2.28739	5.43713	4.57057	4.44029	2.92032	2.86773	4.30683	5.53571	0	0	5.47923	0.797273	4.75388	3.35388	3.15006	3.86072
4	52833505	52853505	Breast_SE_1447_2	4.17855	0	3.67639	2.22279	0	3.81298	0.198273	3.82408	3.61516	0.264819	0	0	0	2.33648	0	1.44243	0	0	6.98748	4.27084	0	3.05212	4.58089	1.10994	0	4.11649	2.37868	4.45246	0	0	4.05977	3.82827	4.98945	1.62785	3.24382	2.57452	3.08612	6.63113	3.87562	4.40416	3.064	1.39301	1.92947
4	54227156	54247156	Breast_SE_1450_2	5.2662	2.9241	4.04803	2.33465	5.30499	4.17411	3.5483	5.31748	3.74662	4.26136	0	2.61733	0	0	3.2314	6.56815	2.24655	0	0	0.928228	0	2.57499	0	6.53689	0	0	0	3.91146	0	0	0	0	3.02998	0	5.34579	0	2.24188	0	0	0	1.81598	3.35598	0
4	57066677	57086677	Breast_SE_1455_4	3.89274	2.38565	4.30728	0.394869	1.94895	2.42071	0	1.97066	3.06627	3.41509	0	3.31287	2.17227	0	4.74213	0	6.21374	0	6.66045	0	0	3.65656	5.24947	5.38541	1.96547	3.94442	0	3.7792	5.58555	0	0.718279	0	4.02371	0	4.73848	0	4.18877	0	3.51407	0	0.703256	3.31995	0
4	57106677	57126677	Breast_SE_1455_6	4.95117	3.76141	5.08168	4.56515	2.93404	3.15358	3.56531	3.99849	3.70994	4.45848	0	4.58119	0	0	5.45804	3.04056	5.49312	4.53432	3.40934	0	3.10403	2.84941	3.07301	5.50578	3.36144	1.4243	0	5.26526	5.2474	0	3.00285	0	2.43748	1.57769	4.36811	0	2.7664	0	3.24776	2.00884	2.74867	3.7817	0
4	73659585	73679585	Breast_SE_1462_2	1.87569	0.313604	0	2.76438	0	0	0	3.56007	2.63498	1.89984	0	5.95155	0	0	0	0	3.3622	0	7.31207	0	0	1.3087	2.55331	2.81515	0	0	0	1.5191	1.9128	0	1.16197	0	0	5.27272	4.63503	0	2.78766	0	2.691	1.99301	1.88463	0.895922	0
4	73699585	73719585	Breast_SE_1462_4	1.65408	0.697666	0	1.27626	0	0	0	0	0	1.10943	0	6.67466	0	0	0	0	5.69446	0	7.06486	0	3.8907	1.84689	3.99677	3.65454	0	1.82	0	3.11097	4.44087	2.99488	2.00537	0	0	6.19341	4.86588	0	3.22164	0	1.72946	1.51408	1.42458	1.47171	0
4	73719585	73739585	Breast_SE_1462_5	1.76291	0.158778	0.802903	3.39699	0	0	0	1.95484	1.27566	0.464623	0	6.21039	0	0	0	0	4.66065	0	6.18653	0	1.78292	1.39886	0.213605	3.42871	0	0	0	2.23819	3.81105	2.83748	1.19935	0	0	5.34918	5.35283	0	2.85817	0	2.12107	2.49356	2.05119	2.80897	0
4	74103744	74123744	Breast_SE_1465_2	4.09768	2.89814	3.12015	3.49275	1.86936	3.35985	0	4.07445	3.12277	4.09609	1.94295	5.737	4.25038	0	1.34793	0	5.02807	0	7.39421	3.2277	3.79486	3.60066	5.16855	3.55717	0.571522	4.71696	0	3.63654	6.1126	3.47998	3.5904	0	3.80947	5.90792	5.08028	0	4.13165	0	2.71497	3.32306	4.15269	2.42476	0
4	76567513	76587513	Breast_SE_1470_9	3.52725	2.06463	2.58243	2.02941	0	4.68033	2.10697	4.43124	0.795288	3.20328	2.10523	0	0	4.94764	5.29801	0	0	0	5.29837	4.90501	3.84724	1.46641	0	0	0	0	3.6605	3.2261	2.80072	0	2.82674	4.69623	4.07782	1.8208	0	2.36725	0.814444	6.16521	1.78436	4.07347	3.75331	1.13291	2.66717
4	78552098	78572098	Breast_SE_1474_3	3.3747	0.672667	4.22353	4.40435	0	0.274067	1.69774	2.59927	4.00999	4.24196	3.28766	0	4.60682	0	4.46717	1.85187	0	0	5.79278	3.69457	4.82818	3.54255	5.1103	0	2.2098	3.19326	2.3874	0	6.34393	2.58244	4.74606	0	4.40722	6.38792	0	0	4.57385	4.55234	3.14732	3.38675	4.09771	1.8972	1.68542
4	80064077	80084077	Breast_SE_1475_4	3.21609	3.79561	3.52221	3.18898	4.50568	4.41856	4.13217	4.48254	3.29033	3.75869	0	5.14815	4.08695	0	0	2.4421	5.06	0.153471	0	0.449153	2.99749	3.09603	5.38102	4.85801	4.69585	3.52959	0	4.30571	6.04649	2.98485	0	2.33511	0	3.98316	5.59637	0	4.22013	2.5236	1.2414	2.73413	2.28975	2.43672	0
4	83110111	83130111	Breast_SE_1481_5	0	3.05145	0	2.15915	1.37155	2.85218	1.70033	0	1.62911	0	0	5.69552	5.32087	0	4.91089	0	2.26374	0	4.67973	2.30413	4.75068	1.53142	2.17225	0	0	0	0.48188	2.90372	5.74956	0	0	1.56264	0	4.0023	2.53313	0	2.26909	0	0	0	0	0	0.839173
4	83250111	83270111	Breast_SE_1481_12	1.60713	1.5182	0	0.411774	0	0	0	0	0	0	0	5.24702	5.34538	0	5.23235	0	2.18881	0	4.43289	3.98779	4.83297	0.139052	0	1.03114	0	0	0	3.2399	5.58121	1.05566	3.86829	0	0.00446512	4.79186	2.77223	0	0.360463	1.13988	1.49957	0	1.42919	0	0
4	105544089	105564089	Breast_SE_1507_1	3.75303	1.43942	2.11313	2.16415	0	2.20817	2.09721	4.05525	0	3.00135	0	0	0	2.40521	0	0	0	0	6.35328	5.96173	0	0	0	0	0	0	0	0	0	0	3.3518	3.93637	4.9223	3.78053	0	4.90061	0.348769	5.52575	1.5649	3.43014	3.04037	0.50231	5.25011
4	113975198	113995198	Breast_SE_1513_3	4.47897	2.52453	1.77959	1.39643	0	2.17959	1.05621	3.09099	1.15666	1.75933	0	5.09195	3.77653	0	0	0	5.5734	0	2.40606	4.09342	3.96577	3.24929	4.60793	4.64391	4.01515	3.94253	0	4.721	5.4928	4.07732	3.43995	0	5.46506	3.71999	5.13025	0	3.53031	3.39793	1.62106	2.0704	1.69941	2.85122	0
4	122765439	122785439	Breast_SE_1521_3	1.84786	2.52189	2.15938	0	0	0	0	0	0	1.48615	0	5.94139	4.45101	0	1.45427	0	4.07653	0	3.50529	4.67844	5.42929	2.61364	3.08468	4.61236	0.805548	2.56874	0	3.64181	4.32042	4.28763	3.64637	0	3.62517	4.17992	4.61388	0	3.79909	0	2.94128	0	2.58773	1.14763	0
4	122815914	122835914	Breast_SE_1522_1	3.71271	3.36028	3.47249	1.82231	0	1.40512	1.16258	1.75215	0.905317	0.732924	0	6.26984	5.79983	0	4.17286	0	5.04106	0	0	3.37217	5.83697	2.3132	2.97655	4.50713	4.67921	1.96109	0	3.11724	0	5.51252	3.02074	0	5.39692	0	5.44205	0	2.64424	0	2.82289	0	2.33404	2.78437	0
4	123537168	123557168	Breast_SE_1523_9	2.98999	0.394278	2.53523	3.20172	4.8379	3.39557	2.87687	0	2.68376	4.48635	0	2.35816	0	4.01518	6.34158	4.12206	0	0	6.53434	4.9659	1.98005	1.79352	1.75553	0	0	0	1.92692	1.60502	2.02098	0	4.68591	2.43397	4.26217	0	0	0	1.61686	3.31212	2.76735	3.06875	2.59778	2.19721	1.09719
4	138908199	138928199	Breast_SE_1533_5	0.796579	0	0	0	0	3.34852	2.69252	3.28988	0	1.45782	0	0	0	3.60492	0	0	0	0	3.42321	3.84016	0	0	0	0	0	0	3.27292	0	1.36462	0	0	7.18343	0	0	0	5.15488	0	4.7212	3.48262	5.08428	3.11396	2.03623	1.25395
4	142472812	142492812	Breast_SE_1542_2	0	0	0	0	0	0	0	3.8214	0	0	2.31017	0	0	0	0	0	1.13787	0	5.88229	0	1.87908	0	0.810436	0	0	0	6.04955	0	0.49897	0	2.61524	5.35946	0	4.20504	0.0912443	3.93081	0	5.05768	0	4.04607	0	0	0
4	150221964	150241964	Breast_SE_1551_2	0.654338	0.931107	2.88928	0	0	0	0	0	0	0	0	6.29153	3.49054	0	0	0	4.51101	0	0	0	2.80708	0	0	5.80895	0.799335	0	0	4.7274	3.71201	3.28352	0	0	0	0	4.50063	0	0	0	2.21752	1.2253	1.79876	0.312172	0
4	152970308	152990308	Breast_SE_1556_3	4.40322	0.96262	2.94382	1.47932	0	0.748329	0	0	1.90019	3.37606	4.00439	2.25252	3.84815	0	2.90473	0	2.97249	0.95342	3.14682	0	6.05326	4.01986	3.76324	4.25184	1.62077	0	0	4.47135	0	0	4.10043	1.59862	3.21572	6.71465	0	0	3.31706	0	2.00656	4.07001	3.50791	0	0.87493
4	152990308	153010308	Breast_SE_1556_4	4.77248	2.25748	3.48203	3.67141	3.48789	3.51131	2.4646	5.33546	2.55072	5.31585	5.70015	0	0	5.65394	0	4.17845	0	0	4.79768	5.34228	4.09454	3.27324	0.035925	0	0	0	3.92619	0	0	0	3.82273	4.35115	4.90536	1.84987	0	0	2.19547	5.03874	4.55556	5.74055	4.93761	1.15778	4.07023
4	155655277	155675277	Breast_SE_1563_1	5.73617	3.72415	3.76292	4.61996	4.61574	3.11821	3.84539	4.80106	4.85748	5.5966	0	0	0	5.54009	0	5.57047	0	2.00166	4.70927	4.58019	0	0	0	0	0	0	0	5.28729	0	0	3.40144	0	4.50787	1.7543	0	0	0	2.30324	0.292871	0	3.04048	3.08174	3.63186
4	184802327	184822327	Breast_SE_1594_2	4.58826	3.3521	4.24291	5.49954	5.62179	4.47678	3.98707	6.18897	5.57492	3.34501	4.7289	0	0	4.61064	0	2.30328	3.59461	0	4.93363	5.03986	4.08186	2.70837	0	0	0	4.54025	0.887566	0	1.69603	0	3.80938	4.1021	5.41711	4.35175	2.84642	2.42939	1.63066	5.96406	3.16977	3.85681	3.77123	2.1953	0
4	188010355	188030355	Breast_SE_1601_6	1.49116	2.53874	3.85491	4.61536	0	0	0	0	3.65842	0.801548	0	0	0	0	5.9152	0	0	1.84009	4.78624	2.37433	0	0	0	0	0	1.50902	0	0	0	0	4.72491	0	4.29568	6.48033	0	0	0	2.13294	0	0	1.52023	0	2.36084
4	190008719	190028719	Breast_SE_1603_1	2.85624	0	0	2.50041	0	0	0	0	3.12598	0	0	0	5.17245	0	2.89814	1.19108	0	4.87837	0	0	0	0	0	0	0	0	0	1.66034	2.34671	0	0	0	6.92635	6.37826	0	0	1.15918	0	0	0	0	0	0
5	82544	102544	Breast_SE_1604_2	0	3.88566	3.04266	3.97522	2.14381	0	4.27311	0	3.22546	2.87825	0	3.26621	0	4.52844	6.06972	5.16148	4.47356	2.99081	0	2.90565	2.26973	0	0	0	0	0	0	3.08713	0	3.86357	5.7543	0	4.42518	0	0	3.26342	0	0	0	0.686778	2.17275	1.45357	0
5	159497	179497	Breast_SE_1605_3	2.38334	2.49108	4.14175	0	2.08395	2.21119	2.92603	3.65452	1.1864	2.64947	0	6.53099	0	2.84246	4.15361	0	6.89141	0	0	3.64807	3.87037	0.797901	0	5.22649	0	0	0	5.8103	3.16543	0	4.7076	0	0	1.46941	5.12935	0	0	4.6759	0	2.03645	0	3.71198	0
5	179497	199497	Breast_SE_1605_4	0	4.36163	2.78308	3.10501	3.98266	3.48728	5.26349	2.49473	2.80863	2.77937	0	4.12629	0	6.57784	4.55713	1.75556	3.07353	3.94025	0	5.82376	2.49153	0.0935714	0	0	0	0	0	3.2772	0	0	5.54852	0	0	0	0	0	0.287082	5.96362	0	2.09306	0	0	1.98376
5	317704	337704	Breast_SE_1608_2	0	0	0	0	0	0	0	0	0	0	0	6.32118	3.46127	0.49931	4.55628	0	0	1.88405	0	0	4.16714	1.04162	0	6.163	0.648561	2.86918	2.76016	5.11988	0	1.65344	1.22148	5.29719	0	0	6.05691	0	0.863675	1.59626	0	0	0	2.10546	0.726602
5	357704	377704	Breast_SE_1608_4	0	0	0	0	0	3.25581	1.84888	0	0	0.904541	0	6.39656	0	4.56331	5.26751	0	5.18304	0	0	0	2.92576	0	0	7.62464	1.99354	3.96135	2.03707	5.29941	2.45408	5.62275	0	7.34262	0	0	7.43196	0	0.817712	0	0	2.30864	0	2.86095	1.73856
5	377704	397704	Breast_SE_1608_5	0	0	0	0	0	2.24072	1.53317	0	0	1.62759	0	5.57054	0	4.06804	4.84114	0	0	1.10574	0	0	4.8797	0	0	6.74224	0	2.52008	3.30263	5.4521	3.9933	2.87721	0.648843	5.37901	0	0	7.05695	0	0	2.64092	0	1.57101	0	1.3894	2.44898
5	397704	417704	Breast_SE_1608_6	2.43578	0	0	0	0	0	0	1.48563	0	1.15132	0	6.34426	0	4.09	5.88804	0	0	0	0	0	3.46862	0	0	6.94978	0	3.84109	0	5.94376	3.07146	0	0	1.91828	0	1.35669	6.98908	0	0	0	2.53943	0.21369	1.09261	3.92271	0
5	941429	961429	Breast_SE_1610_3	3.01313	4.97647	3.55092	2.21554	1.75032	2.33464	0	3.97605	0	2.245	0	4.46354	0	0	3.13513	0	5.2909	0	0	3.70145	3.52194	0.744684	0	4.8911	0	0	0	6.82465	0	4.45748	0	0	0	0	5.28785	0	0	0	3.06603	0.994304	0.724395	3.38726	0
5	1091953	1111953	Breast_SE_1611_4	4.92235	5.8849	4.83755	4.72031	5.40884	6.38864	6.76178	5.17931	4.75068	5.31486	0	2.66098	3.78959	5.69079	4.8508	5.02441	0	5.88304	0	6.06403	5.26487	2.27451	0	0	0	0	4.1089	4.21121	1.35848	6.31495	0	5.5395	0	0	5.1946	2.7914	1.71063	4.77875	0	3.94494	2.8669	3.9778	3.38442
5	1111953	1131953	Breast_SE_1611_5	4.08603	4.90157	3.47766	4.79128	4.19041	6.59578	6.21824	4.50396	2.44256	3.16531	0	0	0	6.09146	2.17824	6.02294	1.32662	3.85439	0	5.09632	0	1.28806	0	0	0	0	3.77967	0.612225	0	0	0	2.97727	0	0	0	2.91324	0	4.73303	2.56199	6.28741	4.7219	3.56313	3.92482
5	1308542	1328542	Breast_SE_1612_3	0	4.13554	1.00394	3.35223	2.70219	5.07002	5.55119	4.265	3.67428	2.46157	5.64902	0	4.30092	6.58849	4.33729	0	1.86969	0	6.31553	6.60893	3.91686	0.798373	0	0	0	1.2182	3.8195	1.64222	2.51283	1.91241	6.32692	7.03616	1.44513	0	0	5.50451	0.0578551	6.65953	0	2.455	1.28881	0	3.42326
5	1502496	1522496	Breast_SE_1613_3	4.35842	4.19205	4.70314	4.83023	4.04356	5.3376	4.49448	4.2233	4.44369	5.26491	6.92184	3.07474	5.1021	2.87075	3.83487	0	4.18623	0	0	3.51576	5.26347	2.74963	0	0	0	0	7.02487	0	2.64065	4.44194	5.95456	3.67385	3.1796	1.5658	4.34688	2.95909	1.80008	0	0	3.07034	2.53767	0.604371	1.33802
5	1775019	1795019	Breast_SE_1614_2	2.61552	0	3.1341	2.79049	1.6838	2.80277	0.208987	0	1.63558	0.302925	0	5.67691	0	0	0	0	5.66714	0	0	0	0	2.11385	2.03791	3.03644	0	0	0	6.68862	5.37174	0	0	0	0	2.98	6.06662	0	1.70776	0	0	0	0	0	0
5	1880178	1900178	Breast_SE_1615_3	6.06048	0	2.97785	0	0	0	0	0.897603	0	0	0	0	0	0	0	0	0	6.22652	0	0	0	4.73384	7.35392	0	5.36066	7.34297	4.91124	0	0	0	0	0	3.71015	0	0	2.32885	4.54592	2.98707	1.8777	0	0	0	3.17148
5	2730294	2750294	Breast_SE_1618_1	0.0935898	0	4.01368	0	0	1.98873	7.21236	3.87513	0	3.00238	2.35026	0	0	2.55707	0	0	0	4.65415	0	4.1778	0	4.29355	5.98096	0	5.6312	5.309	1.38157	2.54397	0	0	3.65538	2.109	0	1.47182	7.31711	0	4.37649	2.18013	4.27744	4.35538	3.8301	0	0
5	2750294	2770294	Breast_SE_1618_2	4.70887	0	4.79136	2.45526	3.44244	5.4306	6.76289	4.90987	1.23753	4.18201	7.25089	0	5.72623	2.96198	0	0	5.60977	6.66231	6.09183	6.35391	5.46887	4.28639	6.18482	0	5.72623	6.32221	6.70967	5.21317	0	0	6.32806	7.05959	2.33451	4.77873	8.21751	4.00347	3.69733	5.24053	2.74731	3.47286	3.14375	2.02996	3.5701
5	2770294	2790294	Breast_SE_1618_3	1.14553	0	0	0	0	1.34463	0.365467	0	0	0.622346	5.91531	0	0	0.519428	0	0	0	0	6.38304	4.91794	4.97939	1.36231	3.65197	0	0	0	5.55057	0	0	0	4.03835	6.12494	0	3.32418	0	2.14168	0	4.54576	2.00649	0	0	0	0.869506
5	2770357	2790357	Breast_SE_1619_1	1.20178	0	0	0	0	1.34463	0.327239	0	0	0.622346	5.91344	0	0	0.519428	0	0	0	0	6.3819	4.91794	4.97939	1.36229	3.65197	0	0	0	5.55212	0	0	0	4.03835	6.1277	0	3.32418	0	2.14168	0	4.54576	1.98905	0	0	0	0.869506
5	3582372	3602372	Breast_SE_1620_1	5.56546	2.20175	5.47144	4.97862	0	0.0865116	0	2.54662	4.28635	5.73155	0	0	0	0	1.18539	0	6.49422	0	0	0	3.95398	4.32141	6.55597	0	6.31105	3.8627	0	4.63517	0	0	0	5.75268	5.27662	0	0	0	4.26983	0	3.86127	0	4.44484	2.63909	0
5	5328452	5348452	Breast_SE_1622_7	3.38625	0	4.26109	0	0	0	0	2.70058	0.650393	0	0	4.56566	0	0	5.98427	0	5.43782	0	5.09251	0	3.77899	0.53898	0	5.62546	0	0	0	5.56097	3.63661	0	0	0	0	0	5.23471	0	0	0	3.57371	0	2.50543	1.66789	0
5	9534349	9554349	Breast_SE_1628_1	2.85827	2.64437	3.8758	0	2.14456	1.75462	2.63594	4.31673	3.17715	4.04628	6.04748	0	0	4.28901	1.7189	0	0.596609	3.40534	0	2.39206	0	3.66724	4.64399	6.38634	4.84222	0	3.12242	4.29552	1.02834	4.76672	0	4.55221	0	0	5.68151	0	2.86035	0	2.84087	2.12749	0	3.28365	0
5	9543693	9563693	Breast_SE_1629_1	2.30596	2.20094	3.36874	0	1.99511	0.308231	2.40337	4.30368	2.89672	3.93531	6.41031	0	0	4.22577	1.0933	0	1.16494	3.45766	4.1199	2.47998	0	3.00106	4.51271	6.34167	4.79959	0	3.45128	4.30729	0.897615	4.85098	0	4.92947	0	0	5.6659	0	2.80232	0	1.42999	2.26485	0	2.90853	0
5	10537692	10557692	Breast_SE_1633_4	0	0	0	0	0	0	0	0	0	0	0	0	5.67536	0	5.27773	0	3.17034	0	0	0	5.79078	0	0	2.71003	0	0	0	3.13716	5.40555	0	3.75837	0	0	1.8032	3.39933	0	0	0	0	3.12993	0	2.04962	0
5	10557692	10577692	Breast_SE_1633_5	0.784883	2.39036	2.9375	2.66524	3.03482	3.76291	5.09899	3.9718	3.1839	2.77142	0.96427	3.37683	6.86891	1.13358	6.40101	6.07959	5.48722	5.65324	0	0	5.76211	0.0509002	0	4.61489	5.55021	3.52088	1.91239	4.80851	5.69049	5.88663	4.62458	0	0	0.555632	5.47911	0	2.07781	0	0	2.299	0	3.73475	0
5	10690926	10710926	Breast_SE_1634_2	4.1224	1.72967	2.62578	0	1.12293	3.63606	0	3.67396	2.5111	1.70296	6.18358	0	7.43956	0	0	0	0	0	6.35497	5.17312	5.30388	0.773528	1.99382	3.62143	1.91014	0	0	0	5.55499	0	3.86271	0	2.35389	2.80497	4.78452	0	1.28495	2.89657	3.28628	2.26639	3.78802	2.48516	0
5	10710926	10730926	Breast_SE_1634_3	4.38663	0	1.58293	0.788387	0	1.61103	0	0.386298	0.892872	2.8261	5.15613	0	6.582	0	0	0	4.11563	0	5.52034	3.28455	3.45262	0	3.29178	2.3657	2.93993	0	0	0	6.03079	0	4.53015	0	4.54174	3.46179	5.20422	0	0	0	3.16447	3.46623	4.40596	2.53515	0
5	14028108	14048108	Breast_SE_1636_1	4.83771	0.966018	3.72104	4.3408	0.55653	2.5808	1.26001	2.22914	2.35598	3.36458	2.52739	5.76501	6.56999	0	0	0	5.90743	0	5.65451	3.03811	5.66716	3.1848	4.43451	6.22568	1.02265	0	0.982363	3.97814	6.91531	4.8347	5.42894	0	1.82218	4.11553	6.16085	0	3.10753	0	4.2667	4.83672	4.70355	3.10631	0
5	14151508	14171508	Breast_SE_1638_2	5.60564	3.73755	4.52492	3.33544	2.88563	3.68975	0	3.15719	4.06778	3.77128	0	6.12969	4.69241	0	0	0	5.28678	0	3.45156	0.76343	6.12535	1.84641	3.01309	5.84179	0	1.14689	0	4.1075	5.75256	5.01505	1.51887	2.59624	0	2.87797	5.80937	0	1.89908	2.67004	4.06031	4.61577	3.12444	2.96263	0
5	14171508	14191508	Breast_SE_1638_3	5.97251	4.22194	4.98673	2.34119	2.97581	3.89892	0	3.78343	3.6634	3.88305	0	6.43725	6.54688	0	0	0	6.06281	0	3.39845	0	6.68911	3.85121	5.08119	7.09529	2.43184	4.43094	0	3.86317	6.0743	3.86498	0	3.18284	0.909754	3.44283	6.19826	0	3.7417	0	3.50579	3.99772	2.30176	3.3101	0
5	14191508	14211508	Breast_SE_1638_4	4.91752	3.99833	4.81089	1.95991	2.46352	3.71032	0	3.38292	3.5514	3.25091	0	3.07724	3.82604	0	0	0	0	0	0	0	5.1309	3.39679	4.05456	5.25016	0	2.26714	0	0	5.53702	1.54541	0	0	0	1.13236	4.9171	0	3.64674	0	3.14225	3.36803	2.00353	2.4216	0
5	14251508	14271508	Breast_SE_1638_7	4.12856	2.83622	2.96329	0.965721	2.01264	3.40311	2.11182	1.54491	2.97165	2.50844	0	5.52817	6.5431	3.2646	0	0	4.31272	0	2.68789	0	6.33438	3.32037	4.20925	6.07218	0	1.32385	1.8733	4.3666	5.61062	3.06989	2.37196	5.46388	0	2.50121	5.10801	0	2.9657	2.94401	3.46893	4.05848	2.74999	2.1282	0
5	17207650	17227650	Breast_SE_1644_1	2.43474	3.44876	3.84564	1.78252	3.68126	3.21478	3.30462	3.49352	3.04032	2.40588	0	5.79904	4.69144	0	0	0	5.09672	0	0	5.64804	5.22269	1.21176	3.03555	3.22602	4.39517	3.92563	4.19581	5.86072	4.26878	6.35807	0	3.5261	0	1.61997	5.19665	0	2.24665	0	0	1.66931	0	1.61884	0
5	32222042	32242042	Breast_SE_1647_3	5.01968	3.93276	4.10281	4.18387	3.29092	4.52312	3.48358	3.203	4.17642	4.28477	5.06148	0	0	4.25423	0	0	0	0	5.30162	6.15098	5.54749	1.93271	0	0	0	0	0	0	0	0	4.41969	3.92547	5.88045	0	0	3.64972	0.561313	5.75651	3.53765	3.55285	3.78021	1.52841	4.11217
5	32322042	32342042	Breast_SE_1647_8	4.56658	3.05326	3.92361	5.03756	3.48906	3.19343	1.89745	1.90772	4.01094	2.96937	0	0	0	5.05281	0	0	0	0	3.78379	6.34153	0	0.219601	0	0	0	0	0	0	0	0	2.0526	4.64399	6.07606	0	0	3.03151	0	5.55961	0.53567	0	1.31535	0	4.6477
5	32702559	32722559	Breast_SE_1651_1	5.07373	5.10819	5.32131	5.47705	1.20234	4.16789	3.63094	0.902156	5.46655	3.52921	0	0.984937	5.1223	4.91178	0	6.80048	6.15579	0	0	7.40887	0	0.569305	0	5.61212	0	0	2.40976	6.08004	1.71646	0	3.25745	0	5.92808	0	3.32892	0	0.0780583	1.09832	0	0	0	0.83773	2.84852
5	34484046	34504046	Breast_SE_1654_3	5.95662	4.12011	4.09469	3.16688	3.1152	5.10511	3.11504	4.93876	3.22718	5.63309	3.67263	0	0	5.09284	0	0	3.57642	0	7.8704	6.30451	2.86362	2.66535	0	3.08146	0	0	0	5.36849	2.40769	0	5.94244	6.26364	4.23163	0	3.0876	0	2.29119	4.14834	2.98999	4.45563	2.58284	3.07681	4.61998
5	34504046	34524046	Breast_SE_1654_4	4.77054	2.72354	2.27121	0	0	4.42949	1.50513	4.39962	1.51371	4.24661	0	0	0	3.23839	0	0	0	0	7.96271	5.69906	0	2.77076	0.872843	0	0	0	0	1.57028	0	0	4.85982	5.49459	3.18617	0	0	0	2.66604	3.19914	2.70899	3.18797	0	0.84707	4.94087
5	35187522	35207522	Breast_SE_1657_8	1.84771	1.37309	2.39061	0	1.77439	4.31588	2.61501	3.7276	0.22821	2.98719	0	0	0	0	0	0	0	0	2.66203	4.0519	2.70134	0	0	0	0	0	3.7483	3.77179	0	0	0.422766	6.72932	0	1.07587	0	5.9472	0	5.70727	2.34836	4.24795	2.28593	0	3.61742
5	35227522	35247522	Breast_SE_1657_10	4.13441	4.72018	0	4.55902	5.06754	4.85602	4.72527	2.46569	1.72314	3.86742	0	4.33351	0	5.46031	0	3.69586	0	0	0	5.82659	2.74401	0	0	0	0	0	5.09847	3.24035	0	0	3.4599	5.08774	4.20585	1.24097	0	5.98513	0	5.50517	0.790359	4.24745	3.79069	2.50695	4.09671
5	36449567	36469567	Breast_SE_1660_3	0	0	0	0	0	0	0	0	0	0	2.7492	0	0	0	0	0	0	0	7.96115	6.29099	2.10962	2.62113	4.57211	0	0	2.9951	0	2.67883	0	0	3.53595	0	0	3.13883	0	0	2.88046	0	1.81576	0	1.29906	0	0
5	36653640	36673640	Breast_SE_1661_2	3.35099	3.1261	3.84234	1.9971	1.40641	4.21899	0	1.52194	2.65997	4.78636	0	3.41165	0	0	0	0	2.48533	0	7.12532	6.2629	1.14581	1.6837	3.33104	0	0	0	0	2.37236	3.73442	0	5.58714	2.68844	0	3.29185	2.86038	0	1.86124	0	3.01682	1.26463	2.91191	2.00634	0
5	39413678	39433678	Breast_SE_1668_3	5.22249	5.09976	4.562	2.3964	2.79464	3.17626	0	3.44917	3.77941	4.17156	0	5.37619	0	0	0	0	3.66522	0	0	4.59591	4.60213	2.68729	3.91309	4.95546	0	0	0	4.2787	4.58248	0	0	0	2.66696	2.42637	4.21	0	3.04176	1.66686	3.1984	1.7576	3.21862	2.55203	3.16306
5	42587397	42607397	Breast_SE_1671_2	0	0	0	0.861984	2.00926	3.43649	1.12656	3.59483	1.33594	2.0313	0	0	0	0	0	0	0	0	0	5.07363	0	0	0	0	0	1.36429	0	0	0	0	0	7.03887	0	0	0	6.50634	0	6.4161	2.68943	2.63545	2.38566	2.00035	3.81675
5	42941955	42961955	Breast_SE_1673_3	4.48169	4.37022	4.56133	5.31874	6.01617	4.70338	4.38961	5.03983	5.16128	5.02197	4.73285	5.44572	6.89937	0	0	4.2653	4.46133	3.54981	5.25263	5.68099	5.47553	1.81939	3.38674	4.31291	3.77931	0.932092	4.23976	6.48856	6.1489	3.85114	3.779	0	0	3.71126	5.22315	0	1.3615	3.6909	0.687258	3.45508	0.238363	3.16088	0
5	42993011	43013011	Breast_SE_1674_2	5.53873	5.7584	5.54446	6.4033	6.29157	5.62571	5.87531	5.21109	5.89946	4.93472	0	4.85803	3.31969	0	3.69112	4.19834	5.49261	3.64173	0.95387	0	5.66804	0.660512	2.99167	0	0	3.59805	5.14132	7.01329	6.00856	4.85128	3.47213	0	3.69079	4.03674	3.35283	0	0	4.6135	0.593166	0	0	3.24642	0
5	43013011	43033011	Breast_SE_1674_3	4.7495	4.78365	4.74509	5.72755	5.56849	4.65289	5.4421	4.81363	5.23804	2.91642	3.77361	5.744	3.68432	0	3.59394	3.09981	4.38769	2.56767	0	0	5.30532	0	0	0	0	0	5.03226	5.97994	2.1493	3.16283	2.67213	5.84042	0	2.34745	0	0	0	0.488632	0	0	0	2.46039	0
5	43415751	43435751	Breast_SE_1675_2	4.81977	4.00373	4.36458	5.90646	2.29191	4.82893	0	0	4.5882	5.95973	0	0	0	0	4.96769	4.62093	3.65652	0	7.46112	6.46448	2.95305	2.29464	3.42013	0	0	3.74702	2.79861	4.07568	2.86554	0	5.51747	0	6.2575	4.74899	2.05374	3.30363	2.29363	3.42639	2.06009	3.13931	3.94271	0	5.16122
5	53016506	53036506	Breast_SE_1679_3	2.00102	1.71736	1.35786	0	0	2.13875	0	0	0	2.46745	0	0	2.80108	0	0	0	3.73243	0	3.75849	0	0	3.35249	4.77948	2.54217	0	2.55099	0	0	6.28545	0.35992	0	0	0	5.49427	5.97513	0	4.06873	0	2.98388	3.26633	1.39106	2.36433	0
5	56415109	56435109	Breast_SE_1686_9	1.28186	1.95572	1.53535	0.403608	0.875276	3.72692	1.10656	2.27302	0.149775	2.09856	2.21103	0	0	2.88976	3.24611	0	0	0	3.85229	4.00479	3.85272	0	0	0	0	0	6.63786	3.32613	0	0	2.46813	4.98702	0	0	0	5.22636	0	6.02501	1.93471	3.12423	1.97659	1.39636	4.90553
5	56455109	56475109	Breast_SE_1686_11	1.38582	0	1.66055	2.77945	0	2.06057	0	1.5521	1.12218	2.29288	0	0	0	4.575	3.87995	0	0	0	4.2447	4.32468	2.02251	0	0	0	0	0	4.46957	1.69361	0	0	2.29407	3.08644	2.37352	0	0	4.19346	0	6.72056	2.95262	3.78276	3.0245	1.56761	4.65759
5	56475109	56495109	Breast_SE_1686_12	3.48793	3.75662	3.81957	4.9664	3.21048	4.47474	3.82278	4.64382	3.98041	4.56081	2.3544	0	0	4.34273	5.99523	3.66243	0	2.1926	4.24738	1.59446	5.54375	2.03779	0.0690528	2.94478	0	0	5.54844	4.43322	2.20671	0	3.88794	2.51142	0	2.69232	0	0	2.13914	5.31137	3.29325	4.08597	4.17469	3.70962	0
5	57807028	57827028	Breast_SE_1692_3	0	0	0	0	0	0	0	0	0	0	0.255245	5.7665	2.76035	0	4.24222	0	2.16491	0	5.58928	2.56255	4.28548	3.02994	3.70048	2.98793	0	0	0	2.59006	4.36304	0	3.59077	0	0.117586	4.8748	0	0	3.05344	0	1.23587	0	0	0	0.596499
5	57827028	57847028	Breast_SE_1692_4	0.820545	0	0	1.09524	0	0	0	0	2.66496	0	0.369793	6.25833	4.84055	0	4.90062	0	3.02019	0	5.86552	3.38583	4.38805	3.76577	5.20642	2.93312	0.651503	3.543	0	3.89127	5.51544	1.82177	4.56721	1.5553	0	4.67166	3.21814	0	4.12805	0	2.45538	1.86866	1.85593	0.56931	2.2999
5	58059509	58079509	Breast_SE_1693_1	0	0	0	0	0	2.65763	1.08566	2.72968	0	0	1.86329	1.70078	0	4.31682	0	0	0	0.528764	4.87978	5.48398	1.43132	0	0	0	0	0	5.37274	0	0	0	4.79558	5.62927	0	0	0	2.39685	0	6.28791	0.893208	2.69283	1.57492	0	3.85529
5	58172716	58192716	Breast_SE_1694_1	0	0	0	0	0	0	0	0	0	0	2.14641	5.32483	1.31296	0	0	0	0	0	6.7672	3.41582	4.90255	1.96965	0	0	0	0	5.31274	0.932816	3.94995	0.64821	3.61622	4.9871	0	4.59608	1.52522	5.41372	2.48388	5.21968	0	0.589844	0	0	3.04957
5	59037091	59057091	Breast_SE_1696_2	2.55884	2.7519	1.48235	1.18431	2.52154	3.27646	3.91526	3.45202	1.22267	0.85515	0.382199	0	5.3576	0	4.48015	0	5.17467	0	0	3.30781	3.1699	0	1.76012	3.48229	0	1.38457	0	3.28583	5.84015	3.80345	0	0.916782	0	6.42097	4.22981	0	1.76519	0	1.41894	1.43769	1.46816	2.79262	0
5	65186108	65206108	Breast_SE_1703_3	3.1865	1.93368	4.06145	0	0	0	0	0	0.775671	0	0	6.51058	5.03812	0	0	0	2.44002	0	0	0	4.35496	4.44959	4.80898	4.77329	0.304119	0	0	0.139265	4.54955	1.60074	0	0	0	4.24599	4.54578	0	5.02471	0	0	0	0	0	0
5	66880542	66900542	Breast_SE_1705_4	1.06629	0	0	1.55141	0.696208	0	0	0	0	3.78407	0	0	0	0	0	4.41083	0	0	5.11064	0	0	2.837	4.47232	0	0	4.59932	0	0	0	1.18059	0	0	0	7.09775	0	0	4.26645	0	1.83601	2.20307	1.87465	0.569445	0
5	67000159	67020159	Breast_SE_1706_2	3.72417	2.95838	3.21645	2.63832	4.48439	3.29636	2.70382	3.44886	2.81548	3.91214	2.79242	2.05015	0	1.45232	0	3.57449	0.38459	2.35306	5.80633	3.42426	1.46686	4.07577	5.74068	0	2.77531	5.32464	3.28601	0	5.3049	0	0.489306	0	0	5.73987	5.20004	1.65199	4.45211	3.56596	3.51736	3.90873	3.40158	2.88786	1.89054
5	67195646	67215646	Breast_SE_1707_2	2.87033	3.76515	3.45022	3.07226	3.42842	4.41557	3.40793	4.30737	3.58852	3.1912	1.547	4.36469	0	0	2.06472	0	0	0	6.19877	0	0	2.12523	2.405	0	0	0	6.79094	0	4.51171	0	0	2.48223	0.260661	3.43141	3.17034	2.381	1.72041	4.85479	3.31518	4.39035	3.14593	1.09127	1.56494
5	67215646	67235646	Breast_SE_1707_3	2.22122	2.92208	3.17537	2.10643	1.34569	3.85124	2.66095	3.87979	2.16061	1.41233	0	5.66716	0	0	3.7772	0	0	0	5.70574	3.02184	1.78278	0	0	0	0	0	7.06763	2.52329	0.178893	0	0	1.63742	0	2.57123	2.72582	3.99856	0	5.04709	2.53136	4.11072	2.14175	1.99208	0.348515
5	67235646	67255646	Breast_SE_1707_4	0.949595	0	0.855329	0	0	0	0	2.64304	0	0	0	5.39189	0	0	4.96166	0	0	0	5.6731	1.61364	0.165269	1.5945	3.33884	0	0	4.19808	6.69291	3.14886	0	0	0	0	0	0	3.37451	3.51416	3.00409	4.66355	2.25762	2.46249	1.01134	1.61898	0
5	67255646	67275646	Breast_SE_1707_5	2.09289	0	0.404433	0	0	0	0	2.12378	0	0	0	5.54156	0	0	4.16812	0	3.18694	0	0	0	2.74027	2.20751	5.01056	0	3.30476	5.9248	0	3.7866	0	0	0	0	0	0	3.83067	0	3.65956	0	2.54186	1.48041	2.24176	2.11918	0
5	68449830	68469830	Breast_SE_1710_5	2.86003	0	0	1.27592	1.94168	2.30521	0	4.28873	0.331929	3.23912	4.11895	0	0	3.03215	0	0	0	0	7.15672	4.31009	1.54458	2.57547	0	0	0	0	4.10897	0.0986592	0	0	3.84329	0	2.34816	3.58374	0	0	2.27663	5.56215	2.90926	2.34105	2.59445	0.524743	3.81646
5	68524348	68544348	Breast_SE_1711_2	3.21678	1.72756	0.924701	2.26954	0.711361	3.60048	2.02717	5.2358	0.630276	0	3.58405	0	0	5.2772	0	0	2.55809	0	6.95389	4.88837	0	0.335959	0	0	0	0	0	3.73106	0	0	2.52618	2.12964	0.669005	0	0	2.36681	0	6.12131	3.1533	1.33837	1.12383	2.40795	5.51867
5	69476592	69496592	Breast_SE_1712_1	3.7278	5.09998	3.08193	5.10501	4.54033	4.49112	5.12639	4.24238	4.72614	4.96876	4.42963	0.969158	4.29765	6.37736	4.10921	5.43409	0	0	2.24622	5.37115	3.42595	1.28869	0	0	0	0	6.35579	0	2.81254	1.18803	5.05957	4.63775	6.29398	5.05403	1.3636	3.11901	0	4.82321	0.379786	3.99168	3.97645	0	3.42203
5	72099252	72119252	Breast_SE_1713_1	3.54852	2.1271	2.32537	0.226558	0	0.445756	1.86112	2.8836	1.01218	2.22232	0	4.80156	3.82724	2.09309	0	0	4.36127	0	0	0	3.2842	0.975027	0	5.08075	3.30268	0	0	3.8797	5.29662	4.96148	0	0.150295	4.22329	0	4.90997	0	2.08433	0	2.93466	2.13249	2.89031	2.90966	0
5	72439645	72459645	Breast_SE_1714_8	3.7246	2.77059	4.04079	0	3.01674	3.22644	1.27035	2.8597	2.54855	3.96797	0	6.21408	6.04603	0.824842	0	0.739185	5.37303	0	3.33006	1.47948	3.63666	0	1.75159	5.22944	2.43911	0	0	5.53457	3.21384	0	3.67141	0	0	3.62691	5.78025	0	1.32723	0	4.12626	2.60501	3.39908	3.94038	0
5	76781549	76801549	Breast_SE_1727_2	2.62769	3.07397	4.32015	0	2.05597	2.5461	0	2.86097	2.45713	2.2324	0	4.84474	3.49805	0	0.608729	0	4.75456	0	4.33583	2.97993	0	2.41145	3.22038	4.22416	2.20273	0	0	3.274	6.31392	0	3.58086	0	0	3.98078	4.81117	0	2.20702	0	1.28873	1.57041	2.1253	2.28299	0
5	77164506	77184506	Breast_SE_1728_1	2.0396	1.22278	0	0	0.880517	2.58848	2.9975	0	1.99684	1.85914	3.30271	0	0	5.42588	0	1.95597	0	0	3.3296	3.34	3.0437	0	0	0	0	0	2.60759	0.778681	4.41763	0	3.38554	5.85067	3.81071	5.29999	0	0	0	3.54104	2.18319	3.32391	3.2158	2.68796	0
5	78527723	78547723	Breast_SE_1729_4	5.86021	5.7268	6.03163	4.32403	4.4494	5.38044	4.63709	5.23652	4.66966	5.12403	0	6.22513	0	0	0	0	4.09642	0	0	0	2.64404	3.30627	2.98524	5.58068	0	0	0	3.09873	4.73976	3.78765	0	0	0	3.07947	5.51413	0	3.19695	0	4.7824	2.13784	4.19688	5.05346	0
5	84374992	84394992	Breast_SE_1737_2	4.41811	1.98568	3.48427	0	5.71545	0.457883	0	3.05282	0	1.78837	0	4.21905	4.48316	0	1.8865	5.6909	6.37593	2.3998	2.77666	0	6.1724	2.30439	0	5.99438	0	0	0	5.99254	5.63036	0	0	0	5.8491	0	5.44014	0	0.964379	0	2.05237	0	1.5016	0.833556	0
5	88654779	88674779	Breast_SE_1740_1	4.17596	2.04932	0.935741	5.55606	2.91497	1.82468	0	2.84976	5.42978	3.40249	4.34459	2.63638	4.75071	4.47608	0.989101	3.07013	5.9152	4.6231	0	4.35264	3.21462	0	0	0	0	0	4.69958	4.78447	4.1109	4.45011	0	4.05502	6.97514	3.6422	1.51506	0	0	4.60122	0	0	0	0	0
5	88674779	88694779	Breast_SE_1740_2	4.48089	3.19678	2.42693	5.30356	4.25137	2.34933	0.991966	4.06512	5.31154	3.69591	4.91612	2.51345	5.24597	4.82834	3.10444	4.05924	5.17828	4.49379	0	5.24764	1.38205	0	0	0.105623	0	0	5.28714	4.06734	4.83286	3.98281	0	5.05186	7.02738	4.58545	0	0	0	5.33712	0	0	0	0.317213	0
5	91116993	91136993	Breast_SE_1742_2	4.57572	2.81616	4.68251	3.94085	0.615868	2.6203	0	4.71415	3.43075	4.00586	2.19119	1.87937	0	0	0	0	0	0	7.32464	4.92378	0.731013	1.34557	0	0	0	0	0	0	0	0	4.15765	0	5.57479	2.42637	0	0	0.546395	3.89758	2.34413	2.29927	3.43714	2.21153	1.03541
5	93574066	93594066	Breast_SE_1746_2	4.38617	4.09135	4.71993	3.97788	2.87669	4.64083	4.11281	5.74664	4.22731	4.96474	5.55508	4.4413	2.96027	2.50818	4.94098	0.740362	5.91312	4.74479	1.31563	1.2191	2.28311	3.62677	3.23586	6.56827	4.85072	0	0	5.12314	5.52698	2.5321	0.767707	0	4.19304	2.88127	0.906711	3.08596	3.76084	0	0	0	0	4.69671	3.57888
5	95720849	95740849	Breast_SE_1747_3	4.32413	3.59094	4.21486	3.9469	4.80215	3.87696	4.0345	5.60261	3.44747	4.12288	5.56775	3.21842	4.33784	2.29425	0	0	5.56297	4.13347	6.44231	3.65713	5.63396	0	0	4.44118	0	2.7499	6.14226	4.18237	5.64704	2.43328	1.20343	5.59403	5.65526	4.37769	4.03332	0.905515	0	3.49506	1.29057	3.76685	2.10002	2.92261	2.80677
5	95848761	95868761	Breast_SE_1748_4	5.13962	4.20689	4.77779	2.91886	3.47211	4.7782	2.93817	5.6132	4.13845	4.13579	1.95686	5.68633	2.6815	0	0	0	0	0	5.71843	2.47068	3.72976	0.601423	0	4.46407	0	4.34516	0	1.60184	5.72081	1.63442	2.57398	5.08865	0	4.64719	5.02138	0	0.759801	2.87442	3.54239	4.39195	4.12337	3.57567	1.99139
5	107557777	107577777	Breast_SE_1761_4	4.60583	1.47118	1.65891	2.1778	3.88223	0	1.1724	0	3.3834	4.40984	4.15676	0	0	0	2.67976	4.77075	0	0	6.02214	2.88496	2.95757	2.54432	4.19729	0	0	4.24969	0	0	3.66026	0	4.44746	0	3.64797	5.03408	1.63315	0	3.07616	0	3.04086	2.74978	3.46228	1.30395	0
5	112955782	112975782	Breast_SE_1768_6	0	0	0	0	1.65917	3.78902	2.53998	3.93558	0	0	0	0	0	0	1.49571	0	0	0	5.29078	4.69801	3.19791	0	0	0	0	0	2.119	0	3.84335	0	3.66186	4.15747	0	2.56453	0	5.3384	0.258604	6.36335	0.572761	3.96415	0.815416	0.167218	4.6533
5	124651100	124671100	Breast_SE_1772_4	3.46571	3.36128	2.10216	2.524	2.47416	2.15709	2.63615	3.54941	3.57479	3.43826	3.43094	0	1.47844	2.88145	5.85806	2.89919	5.13155	0	7.42142	5.36204	5.2251	2.7774	3.35905	2.88789	0	2.80007	0	4.65181	4.48333	0	5.13956	0.0323007	4.32183	4.72923	0	0	2.75178	4.7547	3.19624	3.06128	3.02166	1.7932	0
5	124731100	124751100	Breast_SE_1772_8	4.9551	4.6526	3.45286	2.76542	3.72782	1.85905	3.07534	4.32126	3.78708	4.18192	2.13241	4.06936	0	2.79787	6.29794	5.32216	4.4256	0	5.1338	5.29801	4.79521	2.86229	4.15116	3.96527	0	4.58548	0	5.27893	5.29483	0	4.76726	0	1.811	4.75546	0	3.5614	3.2127	5.01478	2.69877	3.02401	3.07467	2.99573	2.86002
5	126349566	126369566	Breast_SE_1777_2	1.70911	0	1.86021	1.94771	0	0.670773	0	4.69264	0	1.44277	2.87377	5.21919	0	0	0.151832	0	0.252	0	6.27489	4.41726	5.26927	2.84957	3.1289	2.78041	0	1.58057	1.25034	3.8372	5.36017	0	3.70852	0	0	4.36916	0	2.7747	3.31323	4.32197	2.47482	2.03291	2.32514	0.951823	1.75189
5	132251927	132271927	Breast_SE_1786_4	5.71031	4.38804	6.06575	4.70284	4.76188	5.41612	4.33205	5.51442	4.57657	5.52382	0	0	0	2.72982	3.81019	6.56468	7.05236	2.95034	2.30708	3.52549	5.6391	4.56492	6.03895	5.68112	5.73813	5.19804	0	4.8077	5.88937	5.1598	4.11587	5.86072	7.3383	5.1777	6.73528	0	3.5908	0	5.28074	5.57872	5.005	5.20447	1.56006
5	132414553	132434553	Breast_SE_1787_4	4.91565	5.75706	4.94044	5.45256	5.38952	6.68022	5.91303	5.4212	5.23584	5.18702	5.2752	2.19388	0	2.87012	0	4.95006	5.29271	0.418749	6.81183	5.40209	4.93524	2.52038	4.10537	5.07179	1.16167	2.51197	2.89213	4.32993	5.91233	1.60719	6.01269	2.32994	0	5.9203	5.56822	0	2.46434	3.93117	4.37904	4.7241	4.49527	4.30747	0.998709
5	132434553	132454553	Breast_SE_1787_5	3.3843	4.35407	3.84618	4.55645	3.08276	5.20003	4.31652	4.33455	3.26051	4.75629	4.48798	0	0	0	0	4.83207	4.1427	0	5.78406	4.83479	3.41808	1.06542	1.21903	4.85521	0	1.37716	3.75235	3.52368	3.69033	0	5.95269	3.36535	3.28539	5.17129	4.32102	0	1.65717	2.95321	4.60443	4.55188	5.20422	4.33147	0
5	132454553	132474553	Breast_SE_1787_6	5.02301	5.68154	4.55542	5.82899	5.17911	6.65038	6.06009	5.15792	5.33577	5.42474	4.96353	2.85792	0	0	0	5.81724	6.23635	1.22839	5.20748	5.62943	5.68028	3.00692	4.15874	6.1933	0	0	4.74568	6.40181	6.77037	1.76488	5.62	2.13369	4.72617	5.67618	5.10943	0	2.32766	1.90667	4.37931	4.5157	5.03837	4.61348	0
5	134040250	134060250	Breast_SE_1790_5	4.22453	3.44251	0	3.23058	0.945254	2.50999	1.02118	0.535267	2.13752	4.51656	2.61057	0	0	0	0	1.02506	5.98583	0	3.48455	4.34775	4.14337	4.02541	4.02248	0	0	1.01563	0	3.50988	0	0	5.04869	0	4.3505	5.54306	3.17096	0	2.86355	0	4.09557	0	4.75585	0	0
5	134120250	134140250	Breast_SE_1790_9	3.51045	4.84938	3.87677	4.44389	5.02087	6.76836	6.04233	4.23908	3.93675	4.77205	2.48387	5.96727	2.08046	0	2.30364	5.12495	7.03692	0	0	3.44381	4.88616	3.57739	2.03303	5.68475	0	0	0.526313	4.80618	0	1.29211	4.55278	2.50645	0	5.05003	5.32518	0	2.15794	0	4.00437	3.06103	2.07336	3.67802	1.67987
5	134237785	134257785	Breast_SE_1793_2	3.53876	0	2.94314	3.5644	1.32278	3.13816	0	2.32612	2.1746	4.44919	3.71041	0	2.16641	0	0	3.74256	0	0	4.61465	3.17014	4.89235	3.25892	3.45821	0	0	0	0	0	4.54492	0	4.546	3.22116	3.96244	4.78923	0	0.501243	2.80531	5.07994	2.62561	4.93595	4.51338	2.50249	3.39385
5	134547717	134567717	Breast_SE_1795_4	2.3083	2.78565	1.86451	2.57771	1.92851	3.93958	3.74167	1.20403	2.11899	2.62351	0.972398	6.43612	6.71533	0	2.06891	0	5.16879	0	0	0.559866	5.54176	1.14937	0	5.57538	2.80338	0	0	2.8985	6.52854	4.99141	1.22342	3.22622	0	0	5.75026	0	0.380626	0.0321953	2.82649	1.28922	0	4.40837	1.13843
5	135034680	135054680	Breast_SE_1797_3	4.95031	3.51325	5.38411	5.80539	4.42794	3.81138	4.07319	0	4.72815	2.9922	4.16397	2.03986	0	1.39599	3.77221	4.57429	0	2.14782	5.02014	5.09595	5.19204	0	0	2.97794	0	0	0	0	2.22126	0	6.48669	0	1.70691	3.87896	1.8282	2.53788	0	5.29785	0	0	0	0	3.46713
5	135122148	135142148	Breast_SE_1798_1	1.0971	0	1.48039	0	0.762054	1.10977	0	0	0	0	4.67989	0	0	0	0	3.29639	5.29752	0	6.37032	3.21756	3.51947	0.875626	4.20661	1.15378	1.35133	4.58477	0	0	5.45673	0	4.59064	0	3.64399	6.28855	5.26699	0	1.90257	0	0	2.69593	0	0	0
5	135241590	135261590	Breast_SE_1799_4	0.714907	0	0	0	0	0	0	0	0	1.20506	3.81157	4.59759	5.01627	0	0	0.622963	4.30399	0	5.1084	0	4.5906	2.38548	5.00194	4.07494	1.64034	4.52809	0	3.46239	4.9301	0	1.8161	0	1.74221	4.03323	5.23228	0	1.96987	0	3.22168	0	3.06714	1.39587	0
5	136000011	136020011	Breast_SE_1801_2	4.20909	3.31065	4.62673	0.387857	2.03132	3.14816	0	3.19275	2.48613	3.48364	2.6263	6.13322	2.03377	0	0	0	4.99061	0	5.07981	2.19455	3.96059	3.40107	4.57667	6.01035	1.94795	6.31868	0	5.67721	3.81501	1.51425	2.16726	0	0	4.47531	5.2568	0	3.76138	0	1.77091	0.595398	1.12182	3.00983	0
5	136020011	136040011	Breast_SE_1801_3	5.17838	4.54481	5.02329	2.77551	3.63026	4.792	3.85461	4.19166	3.53201	4.20578	2.53616	6.50567	0	0	0	1.82695	6.30593	0	5.95969	2.90005	4.98887	3.20999	5.54301	6.3942	1.22142	6.66311	0	5.59715	4.51794	0	2.44949	0	0	4.89786	6.12475	0	3.70377	0	3.98093	2.60014	3.35774	3.4302	0
5	136040011	136060011	Breast_SE_1801_4	3.5227	2.31335	3.6636	0	1.00756	2.74938	0.810845	3.00982	1.1338	3.02144	3.12889	6.23453	4.35917	0	0	0	5.68617	0	3.50388	1.61473	4.39887	2.32267	1.34425	6.10925	0	4.07894	2.38036	4.70264	5.27333	0.433277	2.1069	0	0	4.87698	5.39362	0	1.93123	0	3.12347	4.49801	1.28915	4.10373	0
5	138601028	138621028	Breast_SE_1809_7	3.79672	2.67288	1.51712	4.09736	4.73963	3.2489	2.03412	4.67074	3.24757	4.33216	3.73179	0	0	5.26224	0	3.69437	0	0	5.56411	4.99389	2.21793	1.85844	1.89753	0	0	0	4.8222	0	0	0	4.20365	3.37364	4.97137	0	0	4.25994	0.874509	6.7832	4.48132	3.94642	4.04533	2.16109	4.85882
5	138715911	138735911	Breast_SE_1811_1	2.8932	2.96569	0	2.94513	2.40342	3.45778	1.3042	3.26565	0.767995	3.78993	4.52843	2.14556	0	5.40522	0	3.46604	3.01085	0	5.04552	3.92325	4.96195	0.772512	2.93559	0	0	1.5566	5.44251	3.65828	1.3866	0	3.86109	5.28714	5.70629	3.49702	0	3.95556	1.08104	5.7029	4.59909	4.54824	4.70853	1.89653	4.60085
5	139635260	139655260	Breast_SE_1815_8	5.74239	4.6785	5.32016	4.84713	5.31928	7.19535	6.12711	5.67916	5.20179	5.33269	6.87922	0	1.88496	6.87424	6.67326	4.91684	3.03222	5.9038	4.72369	7.22847	6.73733	4.16565	3.22535	7.09349	4.96618	3.25602	8.73437	6.77773	5.08069	5.99731	7.23549	7.70797	0	6.27179	5.47197	5.90169	3.53424	8.04279	3.93473	5.90776	3.77283	4.57341	5.3278
5	139655260	139675260	Breast_SE_1815_9	6.45364	5.38008	5.52414	5.70774	5.62657	7.37709	6.4085	6.03483	5.61788	6.05136	6.80525	0	5.31912	6.62041	5.69281	4.98514	4.82507	6.13999	0.377259	7.2617	6.55146	5.02341	6.2633	7.60378	6.42177	5.92459	7.80556	7.11001	6.43027	6.35547	7.30645	6.75887	0	5.67674	7.21461	5.66818	3.92621	7.81106	5.72489	6.62034	4.79002	5.54042	4.41879
5	139675260	139695260	Breast_SE_1815_10	3.92482	1.45523	3.36122	1.33729	2.38951	4.45123	3.02754	2.93295	2.00312	3.15652	3.19838	0	0	2.29274	4.15288	2.87345	0	1.84652	0	3.89312	4.23995	3.19464	0	5.11131	0	0	5.68398	6.3338	0	2.55404	5.19631	3.96076	0	0	3.54829	2.78032	0.85832	4.32553	4.45173	4.59143	2.16562	4.76723	2.63626
5	139695260	139715260	Breast_SE_1815_11	4.1151	3.06951	4.33738	3.72012	3.42552	4.40731	3.87085	4.55073	4.44009	3.60758	0	0	0	0	5.75845	4.69078	4.01125	0	0	3.22978	5.55574	2.56716	0	5.91194	0	0	6.89094	6.98296	0.657644	3.02422	3.96468	1.63772	0	0	3.47658	0	2.07629	2.10609	3.64789	4.44544	1.68037	4.20009	0.682668
5	140316992	140336992	Breast_SE_1819_3	3.17581	2.38764	2.94604	1.87634	2.32806	3.18672	2.03968	1.66971	2.12685	3.09406	0	0	5.7982	4.5098	0	4.97579	3.32686	0	0	4.02201	2.78198	2.2367	2.59423	3.67143	0	0	0	0.693978	6.143	0	2.00035	0	0	0	5.31977	0	1.62019	1.66626	4.05322	1.96886	2.84624	1.04442	0
5	141500388	141520388	Breast_SE_1824_3	5.54935	3.97485	5.53886	3.79187	4.25747	4.30292	3.51282	4.8797	4.77098	4.05487	0	5.97875	0	0	2.28877	5.86408	7.89565	2.81768	4.75261	0.966236	5.32189	4.16575	5.62734	6.10361	5.09962	4.11546	0	7.5477	4.66188	1.54994	4.45408	0	5.43332	5.29572	5.84543	0	3.81397	0	4.9943	0	3.38413	4.10088	0.583475
5	141853500	141873500	Breast_SE_1825_4	3.93236	3.5893	4.31382	4.96863	4.48999	4.15108	3.27205	3.9393	4.11047	4.59201	2.88073	0	0	4.79831	0	4.52608	0	0	3.77097	4.50039	2.5662	2.57501	2.61931	0	0	0	4.94231	0	0	0	5.92486	5.69806	4.70981	3.27643	0	3.26865	1.90197	5.76866	3.69342	5.05467	4.82838	2.10154	3.8454
5	141873500	141893500	Breast_SE_1825_5	4.47783	4.75461	4.14887	4.89252	5.07118	5.62683	5.14971	5.4746	4.43074	4.29079	5.63363	0	0	6.45698	0.386195	5.42421	0	5.16688	3.02513	5.10837	0	2.99508	3.21203	0	0	0	6.00015	1.21933	0	0	6.0209	6.08742	5.38285	2.16501	0	3.1433	2.75947	6.15321	2.04845	4.53002	3.34392	1.76888	4.32552
5	142231852	142251852	Breast_SE_1827_4	2.03973	0	2.83368	0	0	0	0	3.80286	0.576451	0	0	0	0	4.74391	5.763	0	0	0	1.85767	5.39498	0	0.56963	0	0	0	0	0	0	5.10679	0	2.16723	3.72281	0	0	1.58307	0	0	5.42903	4.25477	0.179469	2.95067	2.38139	2.87278
5	142311852	142331852	Breast_SE_1827_8	4.98632	3.71781	4.9705	3.87897	4.30391	4.59345	3.91872	5.70801	3.99724	4.47561	3.25177	6.70442	6.52665	0	6.86726	2.55183	5.56025	1.80811	3.47346	2.89449	4.79807	3.80892	6.48825	5.8219	6.05082	0	0.576068	4.51314	7.54644	6.10139	4.06337	5.94243	0	5.72446	7.07631	0	3.81808	4.93526	3.85461	3.58826	3.1281	3.92276	0
5	142351852	142371852	Breast_SE_1827_10	2.86605	2.10158	3.06995	2.02108	2.12224	3.51132	2.65215	4.62931	2.40552	2.82448	0.234952	5.64318	5.57811	4.0373	5.53979	0	5.15224	3.86336	1.78411	3.09583	3.52396	2.403	5.26121	4.28537	4.83441	0	2.0239	3.83337	6.99178	5.21763	4.18462	4.14878	0	3.76356	6.08386	0	3.08929	3.88326	3.73678	3.07961	2.80095	3.7524	1.1241
5	143231720	143251720	Breast_SE_1832_6	3.60269	1.1148	3.23217	0	1.30486	0.94311	0	1.64511	0.836367	2.40977	2.62064	6.18382	4.58	0	0	0	5.37161	0	4.44215	0	5.08725	3.04655	5.73373	4.99375	2.13202	4.71527	0	4.98662	6.04134	3.89413	3.21738	0	0	4.77986	5.40519	0	3.82036	0	3.65673	1.16581	3.03224	3.23444	0
5	143388104	143408104	Breast_SE_1834_2	5.29358	5.62999	5.05927	5.1905	5.53811	5.70029	5.80231	5.62852	4.6789	4.79519	5.88913	7.41704	6.82965	5.45893	0	6.90903	7.01156	5.6051	0	5.70788	6.79044	4.13466	6.07536	6.58261	5.71642	7.01947	5.98373	6.63366	6.52696	6.13594	5.15225	3.1551	5.49655	5.89005	6.40853	0	4.46645	4.42838	3.72306	4.38598	3.88646	4.06751	3.99038
5	148898976	148918976	Breast_SE_1838_1	0	0.784632	0.965586	1.75702	0	3.23159	0	2.23334	1.50706	1.58604	1.06251	2.51161	5.2142	0	0	0	2.75553	0	5.53635	4.77548	1.66207	2.14597	5.12653	2.44479	2.45431	5.17205	0	0	6.30113	2.30338	4.27308	0.718013	2.95737	4.81636	3.5786	0	2.06976	0	4.206	3.4323	3.98486	1.61628	0
5	148958976	148978976	Breast_SE_1838_4	3.23068	4.57898	3.2401	4.14907	4.35187	5.70156	2.08889	4.90365	2.84287	3.1017	2.92593	4.73285	4.49143	1.42966	0	0	0	0.572417	7.0451	5.91972	4.24545	1.76676	4.61929	4.33127	3.95898	6.295	0	5.41058	6.66048	2.55277	5.49463	3.05523	4.1921	4.6372	5.16367	0	2.1136	3.82986	4.88976	4.88547	4.79477	1.96305	3.42172
5	148978976	148998976	Breast_SE_1838_5	0	2.08172	2.21808	2.49422	0	3.3574	0	1.83525	0	0.703315	2.3502	0	2.20054	0	0	0	0	0	6.07256	4.29452	2.69515	1.25226	4.21719	0	1.44773	5.32732	0	2.61771	4.83532	2.16101	4.79411	1.77536	2.53494	4.58747	3.46573	0	2.95899	0	2.54557	3.55583	3.16428	1.28086	0
5	148998976	149018976	Breast_SE_1838_6	0	0	0	2.63738	0	4.18219	0	0	0	2.32677	0	0	0	1.86382	0	4.32813	3.57106	0	4.53521	0	0	0	0	0	0	0	0	6.05364	4.63241	4.60594	5.56151	1.49733	0	5.4544	4.00446	0	0	0	2.99003	3.68309	3.62074	1.84146	0
5	149058976	149078976	Breast_SE_1838_9	2.8704	0.0953393	2.65422	3.97287	1.47728	0	0	0.203638	1.94228	2.25129	4.2646	2.35687	4.0788	0	0	0.745641	1.01077	0	5.5306	0	1.93512	2.72234	4.7179	3.32714	3.06528	0.744955	0	0	5.51664	0	4.38501	0	6.00609	5.37575	3.15533	0	2.71583	0	3.4374	0	4.11128	0.590792	0
5	149120477	149140477	Breast_SE_1839_2	0.700335	0	0	0	0	3.95724	0	4.36471	0	1.83847	3.93341	0	2.79812	2.04139	0	1.71072	0.039722	0	5.6207	4.88396	4.53479	2.34979	3.8301	2.09451	1.51303	4.04751	5.89092	0	5.68878	0	3.33172	1.74858	0	4.44937	1.97092	1.17781	2.23234	5.89788	1.81802	3.01035	2.6946	1.47131	2.89332
5	149140477	149160477	Breast_SE_1839_3	0.273771	0.625528	1.44956	0	0	0.881978	0	3.46818	2.1924	0	0	0	4.59497	0	0	0	3.58754	0	0	2.53145	0	1.54836	3.55429	4.74498	3.72824	3.99128	2.13976	0	6.34992	1.36483	0	2.58281	0	0	5.33654	0	2.55127	4.81839	2.98557	4.75815	2.49109	3.53984	0
5	149386443	149406443	Breast_SE_1840_7	3.49075	2.56889	4.52498	2.22762	3.11427	3.29004	0	3.90548	3.15599	2.47177	0	0	0	0	5.0899	0	6.17597	0	0	0	0	0	0	6.30991	0	0	0	7.4357	0	0	0	0	0	3.00249	2.15561	0	0	0	3.92008	0	1.95039	3.74029	0
5	149406443	149426443	Breast_SE_1840_8	4.29799	4.12723	5.45852	2.4046	4.56573	4.55992	3.40791	4.73478	4.09736	4.08774	0	0	0	0	5.75778	0	6.07866	0	0	0	0	1.85819	0	6.42066	0	0	0	7.69962	0	0	0	0	2.57653	0	1.65859	0	0	0	5.08873	0	0	5.21829	0
5	149446443	149466443	Breast_SE_1840_10	4.89927	3.54224	5.33513	2.72878	4.61709	4.60617	3.01478	5.1675	3.99767	3.68642	0	2.61397	0	1.96233	4.83987	2.36576	4.1178	0	0.169451	2.93834	2.25101	3.5736	4.65445	6.4996	3.9264	2.24697	0	5.50647	5.43589	0	2.31737	3.25701	0	0	5.42324	0	2.78196	1.24902	4.72372	4.8042	3.13979	3.92002	2.47407
[truncated: 1,909 more rows]
