# Supplementary material for: Super-enhancer acquisition drives oncogene expression in triple negative breast cancer
Source: PLoS One. 2020 Jun 25;15(6):e0235343. doi: 10.1371/journal.pone.0235343 (PMC7316302; doi:10.1371/journal.pone.0235343)
Supplement: S3 Table — (XLSX) [file pone.0235343.s008.xlsx]

## Sheet: Group1
Cluster 1 SEs
Breast_SE_1_2
Breast_SE_1_3
Breast_SE_1075_1
Breast_SE_1075_2
Breast_SE_109_2
Breast_SE_1094_4
Breast_SE_1104_3
Breast_SE_1106_4
Breast_SE_1163_2
Breast_SE_1198_1
Breast_SE_121_1
Breast_SE_1225_5
Breast_SE_1235_4
Breast_SE_1302_8
Breast_SE_1344_2
Breast_SE_1349_1
Breast_SE_1360_6
Breast_SE_1419_2
Breast_SE_1433_2
Breast_SE_1434_15
Breast_SE_1434_6
Breast_SE_144_1
Breast_SE_153_4
Breast_SE_1533_5
Breast_SE_1611_4
Breast_SE_1611_5
Breast_SE_1612_3
Breast_SE_1647_8
Breast_SE_1657_10
Breast_SE_1657_8
Breast_SE_1671_2
Breast_SE_1686_11
Breast_SE_1686_9
Breast_SE_1693_1
Breast_SE_1815_8
Breast_SE_1881_7
Breast_SE_1898_7
Breast_SE_19_5
Breast_SE_1946_5
Breast_SE_1977_4
Breast_SE_1995_10
Breast_SE_1996_2
Breast_SE_1996_3
Breast_SE_1999_2
Breast_SE_1999_3
Breast_SE_2006_1
Breast_SE_2023_10
Breast_SE_2252_3
Breast_SE_2268_2
Breast_SE_238_5
Breast_SE_2384_6
Breast_SE_244_6
Breast_SE_246_3
Breast_SE_2509_2
Breast_SE_2518_6
Breast_SE_2533_1
Breast_SE_2587_13
Breast_SE_2673_1
Breast_SE_2727_3
Breast_SE_2729_3
Breast_SE_2729_5
Breast_SE_2730_1
Breast_SE_2755_2
Breast_SE_2755_6
Breast_SE_2755_8
Breast_SE_2755_9
Breast_SE_2770_13
Breast_SE_2849_1
Breast_SE_2850_4
Breast_SE_2854_8
Breast_SE_2877_3
Breast_SE_2886_4
Breast_SE_2922_1
Breast_SE_298_3
Breast_SE_2981_1
Breast_SE_2996_1
Breast_SE_3007_6
Breast_SE_3044_3
Breast_SE_3079_1
Breast_SE_3106_3
Breast_SE_3110_38
Breast_SE_3110_45
Breast_SE_3138_2
Breast_SE_3141_13
Breast_SE_3147_4
Breast_SE_3167_2
Breast_SE_3229_2
Breast_SE_3257_5
Breast_SE_3260_5
Breast_SE_3261_5
Breast_SE_3264_12
Breast_SE_3320_7
Breast_SE_3321_4
Breast_SE_3354_2
Breast_SE_3378_12
Breast_SE_3388_5
Breast_SE_3389_2
Breast_SE_3411_12
Breast_SE_343_3
Breast_SE_3469_5
Breast_SE_3469_7
Breast_SE_3494_14
Breast_SE_3514_23
Breast_SE_3514_24
Breast_SE_3515_8
Breast_SE_3521_18
Breast_SE_3521_46
Breast_SE_3530_6
Breast_SE_3531_3
Breast_SE_3531_4
Breast_SE_3531_5
Breast_SE_3533_3
Breast_SE_3636_1
Breast_SE_3670_7
Breast_SE_3766_5
Breast_SE_3782_1
Breast_SE_382_4
Breast_SE_3890_3
Breast_SE_3896_4
Breast_SE_3924_9
Breast_SE_4043_18
Breast_SE_4053_3
Breast_SE_4069_17
Breast_SE_41_2
Breast_SE_41_3
Breast_SE_4102_4
Breast_SE_4102_5
Breast_SE_4197_3
Breast_SE_4201_6
Breast_SE_4215_10
Breast_SE_4227_4
Breast_SE_4228_2
Breast_SE_423_3
Breast_SE_423_4
Breast_SE_4231_26
Breast_SE_4248_4
Breast_SE_4269_4
Breast_SE_427_4
Breast_SE_4300_3
Breast_SE_4342_4
Breast_SE_4360_4
Breast_SE_440_3
Breast_SE_4400_6
Breast_SE_4408_3
Breast_SE_4441_1
Breast_SE_4450_6
Breast_SE_4450_7
Breast_SE_4456_4
Breast_SE_4460_1
Breast_SE_4469_1
Breast_SE_45_2
Breast_SE_4524_3
Breast_SE_4545_1
Breast_SE_4547_6
Breast_SE_4576_4
Breast_SE_4588_3
Breast_SE_4594_10
Breast_SE_4594_11
Breast_SE_4594_12
Breast_SE_4594_13
Breast_SE_4594_15
Breast_SE_4594_17
Breast_SE_4594_21
Breast_SE_4594_4
Breast_SE_4594_7
Breast_SE_4594_9
Breast_SE_4604_10
Breast_SE_4604_19
Breast_SE_4604_9
Breast_SE_4609_3
Breast_SE_4614_4
Breast_SE_4627_4
Breast_SE_4680_4
Breast_SE_4715_5
Breast_SE_4744_13
Breast_SE_4759_3
Breast_SE_4763_7
Breast_SE_4763_8
Breast_SE_4771_7
Breast_SE_4772_4
Breast_SE_4817_3
Breast_SE_4829_1
Breast_SE_4848_4
Breast_SE_4851_3
Breast_SE_4853_10
Breast_SE_4862_2
Breast_SE_4864_6
Breast_SE_4864_8
Breast_SE_4865_6
Breast_SE_4872_4
Breast_SE_4994_11
Breast_SE_4994_18
Breast_SE_5_1
Breast_SE_5006_2
Breast_SE_5006_3
Breast_SE_5021_11
Breast_SE_5028_1
Breast_SE_5031_9
Breast_SE_5050_3
Breast_SE_5050_5
Breast_SE_5052_1
Breast_SE_5053_1
Breast_SE_5075_8
Breast_SE_5075_9
Breast_SE_5079_7
Breast_SE_5087_6
Breast_SE_5096_12
Breast_SE_5096_16
Breast_SE_5097_3
Breast_SE_5097_5
Breast_SE_5097_6
Breast_SE_5106_9
Breast_SE_5109_3
Breast_SE_5115_3
Breast_SE_513_2
Breast_SE_5163_1
Breast_SE_5198_2
Breast_SE_5206_5
Breast_SE_5220_5
Breast_SE_5256_12
Breast_SE_5300_1
Breast_SE_5305_11
Breast_SE_5305_12
Breast_SE_5305_2
Breast_SE_5310_3
Breast_SE_5325_2
Breast_SE_5340_8
Breast_SE_5376_13
Breast_SE_539_1
Breast_SE_5418_6
Breast_SE_5422_4
Breast_SE_5431_2
Breast_SE_5449_2
Breast_SE_5455_5
Breast_SE_5468_8
Breast_SE_5480_6
Breast_SE_5517_2
Breast_SE_5577_2
Breast_SE_566_2
Breast_SE_566_3
Breast_SE_573_7
Breast_SE_604_4
Breast_SE_604_5
Breast_SE_604_6
Breast_SE_647_3
Breast_SE_65_6
Breast_SE_65_7
Breast_SE_662_6
Breast_SE_702_3
Breast_SE_728_3
Breast_SE_738_6
Breast_SE_742_1
Breast_SE_792_1
Breast_SE_844_2
Breast_SE_893_1
Breast_SE_933_1
Breast_SE_967_4
Breast_SE_967_5
Breast_SE_981_19
Breast_SE_981_20

## Sheet: Group1&2 overlap
Cluster 1&2 SEs
Breast_SE_1109_15
Breast_SE_1120_9
Breast_SE_1143_3
Breast_SE_1147_4
Breast_SE_1163_1
Breast_SE_124_8
Breast_SE_125_3
Breast_SE_1287_9
Breast_SE_1329_2
Breast_SE_133_8
Breast_SE_1338_5
Breast_SE_1396_3
Breast_SE_1396_6
Breast_SE_142_1
Breast_SE_1712_1
Breast_SE_1809_7
Breast_SE_1811_1
Breast_SE_1825_4
Breast_SE_1825_5
Breast_SE_1864_5
Breast_SE_1876_3
Breast_SE_1879_22
Breast_SE_1890_1
Breast_SE_1890_2
Breast_SE_1890_3
Breast_SE_19_10
Breast_SE_19_11
Breast_SE_19_6
Breast_SE_19_7
Breast_SE_1925_4
Breast_SE_1925_8
Breast_SE_1988_6
Breast_SE_2005_2
Breast_SE_2026_6
Breast_SE_2119_5
Breast_SE_2120_2
Breast_SE_2130_1
Breast_SE_2132_2
Breast_SE_2181_1
Breast_SE_222_2
Breast_SE_2303_1
Breast_SE_2384_9
Breast_SE_2520_2
Breast_SE_2556_5
Breast_SE_2696_2
Breast_SE_272_1
Breast_SE_2729_4
Breast_SE_2745_1
Breast_SE_2755_15
Breast_SE_277_7
Breast_SE_2785_1
Breast_SE_2851_6
Breast_SE_2937_2
Breast_SE_2961_3
Breast_SE_2978_2
Breast_SE_301_7
Breast_SE_303_2
Breast_SE_305_5
Breast_SE_3069_3
Breast_SE_3074_14
Breast_SE_3079_4
Breast_SE_3085_1
Breast_SE_3131_5
Breast_SE_3162_1
Breast_SE_324_3
Breast_SE_324_4
Breast_SE_3261_4
Breast_SE_329_6
Breast_SE_329_8
Breast_SE_334_3
Breast_SE_335_2
Breast_SE_3378_4
Breast_SE_3385_2
Breast_SE_3386_7
Breast_SE_3483_8
Breast_SE_3494_4
Breast_SE_3496_6
Breast_SE_3496_8
Breast_SE_3500_32
Breast_SE_3501_5
Breast_SE_3502_6
Breast_SE_3502_7
Breast_SE_3507_2
Breast_SE_3512_9
Breast_SE_3513_11
Breast_SE_3515_9
Breast_SE_3590_1
Breast_SE_3601_1
Breast_SE_3628_7
Breast_SE_3643_1
Breast_SE_3665_8
Breast_SE_3669_7
Breast_SE_368_3
Breast_SE_3753_2
Breast_SE_3759_2
Breast_SE_3759_3
Breast_SE_3763_2
Breast_SE_3770_8
Breast_SE_3772_6
Breast_SE_3883_3
Breast_SE_3913_2
Breast_SE_3983_2
Breast_SE_4111_7
Breast_SE_4160_4
Breast_SE_4162_2
Breast_SE_4177_3
Breast_SE_418_2
Breast_SE_418_3
Breast_SE_418_4
Breast_SE_418_6
Breast_SE_418_8
Breast_SE_4183_8
Breast_SE_4196_2
Breast_SE_4199_2
Breast_SE_4215_6
Breast_SE_4267_6
Breast_SE_4269_6
Breast_SE_4269_7
Breast_SE_4269_8
Breast_SE_427_22
Breast_SE_4400_3
Breast_SE_4437_10
Breast_SE_4437_9
Breast_SE_4530_3
Breast_SE_4541_4
Breast_SE_4546_4
Breast_SE_4547_7
Breast_SE_4562_1
Breast_SE_4570_7
Breast_SE_4594_24
Breast_SE_4607_9
Breast_SE_4614_6
Breast_SE_4616_2
Breast_SE_4624_10
Breast_SE_4708_3
Breast_SE_4708_4
Breast_SE_4721_1
Breast_SE_4738_7
Breast_SE_4750_6
Breast_SE_4759_4
Breast_SE_4763_6
Breast_SE_4823_3
Breast_SE_4853_9
Breast_SE_4871_19
Breast_SE_4871_21
Breast_SE_4947_5
Breast_SE_499_3
Breast_SE_5075_2
Breast_SE_5076_5
Breast_SE_5079_5
Breast_SE_5079_6
Breast_SE_5087_5
Breast_SE_5206_9
Breast_SE_5226_5
Breast_SE_5270_2
Breast_SE_5280_6
Breast_SE_5296_3
Breast_SE_5341_6
Breast_SE_5365_2
Breast_SE_5407_10
Breast_SE_5420_8
Breast_SE_5423_8
Breast_SE_5432_17
Breast_SE_5439_7
Breast_SE_5444_10
Breast_SE_5444_4
Breast_SE_5462_3
Breast_SE_58_5
Breast_SE_586_3
Breast_SE_692_2
Breast_SE_748_3
Breast_SE_748_9
Breast_SE_782_9
Breast_SE_792_4
Breast_SE_831_1
Breast_SE_977_4
Breast_SE_981_24
Breast_SE_998_5

## Sheet: Group2
Cluster 2 SEs
Breast_SE_1073_2
Breast_SE_1150_4
Breast_SE_1178_2
Breast_SE_1231_14
Breast_SE_1231_5
Breast_SE_1238_4
Breast_SE_1251_2
Breast_SE_1283_7
Breast_SE_1321_3
Breast_SE_1329_6
Breast_SE_146_1
Breast_SE_15_9
Breast_SE_1556_3
Breast_SE_1556_4
Breast_SE_1594_2
Breast_SE_1634_3
Breast_SE_1728_1
Breast_SE_1761_4
Breast_SE_1787_5
Breast_SE_1793_2
Breast_SE_1864_6
Breast_SE_1864_8
Breast_SE_1870_1
Breast_SE_1870_2
Breast_SE_1875_5
Breast_SE_1932_2
Breast_SE_2118_4
Breast_SE_2217_12
Breast_SE_2238_2
Breast_SE_226_3
Breast_SE_2373_4
Breast_SE_2387_13
Breast_SE_247_5
Breast_SE_2627_2
Breast_SE_2748_3
Breast_SE_2749_4
Breast_SE_277_4
Breast_SE_2845_3
Breast_SE_2932_1
Breast_SE_30_3
Breast_SE_30_4
Breast_SE_3040_6
Breast_SE_305_4
Breast_SE_309_2
Breast_SE_3172_4
Breast_SE_3187_6
Breast_SE_3309_8
Breast_SE_3392_7
Breast_SE_3398_9
Breast_SE_343_6
Breast_SE_3446_5
Breast_SE_3451_1
Breast_SE_3467_2
Breast_SE_3483_5
Breast_SE_3613_2
Breast_SE_3615_2
Breast_SE_3628_8
Breast_SE_3665_3
Breast_SE_3679_14
Breast_SE_3679_6
Breast_SE_3708_4
Breast_SE_3772_7
Breast_SE_4157_10
Breast_SE_4157_8
Breast_SE_42_4
Breast_SE_42_5
Breast_SE_4206_5
Breast_SE_4206_8
Breast_SE_4309_3
Breast_SE_4310_1
Breast_SE_4310_12
Breast_SE_433_7
Breast_SE_436_3
Breast_SE_4361_3
Breast_SE_4399_2
Breast_SE_4428_3
Breast_SE_4467_2
Breast_SE_4467_3
Breast_SE_4510_3
Breast_SE_4549_3
Breast_SE_456_1
Breast_SE_456_2
Breast_SE_4624_11
Breast_SE_4624_9
Breast_SE_4712_2
Breast_SE_4721_2
Breast_SE_4723_3
Breast_SE_4777_5
Breast_SE_4853_14
Breast_SE_4944_2
Breast_SE_5014_10
Breast_SE_5031_5
Breast_SE_5049_5
Breast_SE_5059_11
Breast_SE_5090_14
Breast_SE_5105_11
Breast_SE_5114_3
Breast_SE_5184_11
Breast_SE_5226_4
Breast_SE_524_3
Breast_SE_5256_1
Breast_SE_5260_6
Breast_SE_5272_36
Breast_SE_5272_37
Breast_SE_5272_57
Breast_SE_5281_4
Breast_SE_5285_8
Breast_SE_5306_2
Breast_SE_531_14
Breast_SE_531_15
Breast_SE_5328_2
Breast_SE_5331_3
Breast_SE_5351_2
Breast_SE_5359_6
Breast_SE_5361_6
Breast_SE_5386_20
Breast_SE_5409_3
Breast_SE_5409_4
Breast_SE_5432_2
Breast_SE_5444_3
Breast_SE_5461_6
Breast_SE_5462_23
Breast_SE_5482_9
Breast_SE_581_1
Breast_SE_623_8
Breast_SE_731_3
Breast_SE_772_2
Breast_SE_775_5
Breast_SE_928_4
Breast_SE_931_3

## Sheet: Group3
Cluster 3 SEs
Breast_SE_1027_3
Breast_SE_111_2
Breast_SE_1221_14
Breast_SE_1244_1
Breast_SE_1331_5
Breast_SE_1359_4
Breast_SE_1401_3
Breast_SE_1433_5
Breast_SE_1615_3
Breast_SE_1618_1
Breast_SE_1620_1
Breast_SE_1706_2
Breast_SE_1707_5
Breast_SE_2198_7
Breast_SE_2250_6
Breast_SE_2301_3
Breast_SE_2301_5
Breast_SE_2479_2
Breast_SE_2496_4
Breast_SE_2574_1
Breast_SE_2622_10
Breast_SE_2904_2
Breast_SE_2910_9
Breast_SE_3_16
Breast_SE_3110_17
Breast_SE_3110_18
Breast_SE_3206_1
Breast_SE_3310_17
Breast_SE_3310_23
Breast_SE_3371_9
Breast_SE_3387_6
Breast_SE_3596_7
Breast_SE_3625_1
Breast_SE_3625_2
Breast_SE_4025_1
Breast_SE_4063_5
Breast_SE_415_1
Breast_SE_415_3
Breast_SE_4153_1
Breast_SE_4160_7
Breast_SE_4193_3
Breast_SE_4271_2
Breast_SE_4298_6
Breast_SE_4384_2
Breast_SE_441_5
Breast_SE_4547_1
Breast_SE_4547_2
Breast_SE_4585_1
Breast_SE_4920_1
Breast_SE_4925_3
Breast_SE_4988_1
Breast_SE_5_13
Breast_SE_5_14
Breast_SE_5052_2
Breast_SE_5144_6
Breast_SE_5188_5
Breast_SE_5471_6
Breast_SE_5471_7
Breast_SE_602_8
Breast_SE_780_11
Breast_SE_781_1
Breast_SE_805_2
Breast_SE_852_3
Breast_SE_909_2

## Sheet: Group4
Cluster 4 SEs
Breast_SE_1013_2
Breast_SE_1013_4
Breast_SE_1016_10
Breast_SE_1016_6
Breast_SE_1017_8
Breast_SE_1020_1
Breast_SE_1025_5
Breast_SE_1030_10
Breast_SE_1038_2
Breast_SE_1038_3
Breast_SE_1040_2
Breast_SE_108_10
Breast_SE_1083_11
Breast_SE_1114_2
Breast_SE_1127_1
Breast_SE_1143_5
Breast_SE_1208_2
Breast_SE_1250_2
Breast_SE_1265_5
Breast_SE_1297_3
Breast_SE_1297_4
Breast_SE_1333_4
Breast_SE_1350_2
Breast_SE_1357_13
Breast_SE_1357_6
Breast_SE_1375_7
Breast_SE_1400_6
Breast_SE_152_2
Breast_SE_1521_3
Breast_SE_1551_2
Breast_SE_1633_5
Breast_SE_1636_1
Breast_SE_1638_2
Breast_SE_1638_3
Breast_SE_1638_7
Breast_SE_1673_3
Breast_SE_1674_2
Breast_SE_1696_2
Breast_SE_1713_1
Breast_SE_1714_8
Breast_SE_1729_4
Breast_SE_176_3
Breast_SE_1795_4
Breast_SE_1801_4
Breast_SE_1827_10
Breast_SE_1827_8
Breast_SE_1832_6
Breast_SE_1834_2
Breast_SE_1844_2
Breast_SE_1846_5
Breast_SE_1852_10
Breast_SE_1852_7
Breast_SE_1855_5
Breast_SE_1857_21
Breast_SE_1860_1
Breast_SE_1879_1
Breast_SE_1894_5
Breast_SE_1894_7
Breast_SE_1897_3
Breast_SE_1897_4
Breast_SE_1952_1
Breast_SE_1953_1
Breast_SE_198_3
Breast_SE_1995_8
Breast_SE_2010_13
Breast_SE_2027_7
Breast_SE_204_1
Breast_SE_2043_1
Breast_SE_2075_1
Breast_SE_2213_5
Breast_SE_2248_2
Breast_SE_2248_7
Breast_SE_2254_16
Breast_SE_2254_7
Breast_SE_2281_2
Breast_SE_2286_2
Breast_SE_2287_1
Breast_SE_2342_8
Breast_SE_2348_1
Breast_SE_2361_11
Breast_SE_2361_7
Breast_SE_2361_8
Breast_SE_2386_5
Breast_SE_2428_1
Breast_SE_2438_4
Breast_SE_2438_6
Breast_SE_2439_18
Breast_SE_246_11
Breast_SE_246_12
Breast_SE_2479_8
Breast_SE_2522_2
Breast_SE_2523_12
Breast_SE_2523_19
Breast_SE_2571_3
Breast_SE_2571_4
Breast_SE_2571_7
Breast_SE_2615_5
Breast_SE_2615_6
Breast_SE_2623_6
Breast_SE_267_4
Breast_SE_2724_4
Breast_SE_2749_2
Breast_SE_2760_11
Breast_SE_2825_18
Breast_SE_2825_21
Breast_SE_2825_7
Breast_SE_2825_8
Breast_SE_2830_17
Breast_SE_2871_5
Breast_SE_2875_2
Breast_SE_2934_3
Breast_SE_2976_1
Breast_SE_3035_10
Breast_SE_3035_8
Breast_SE_3035_9
Breast_SE_3040_9
Breast_SE_3050_1
Breast_SE_3064_5
Breast_SE_3064_6
Breast_SE_3073_3
Breast_SE_3079_14
Breast_SE_3079_20
Breast_SE_3101_5
Breast_SE_3105_10
Breast_SE_3105_15
Breast_SE_3105_17
Breast_SE_3105_18
Breast_SE_3105_8
Breast_SE_3121_2
Breast_SE_3153_3
Breast_SE_3155_3
Breast_SE_3202_5
Breast_SE_3203_13
Breast_SE_3214_6
Breast_SE_3239_2
Breast_SE_3247_9
Breast_SE_3253_11
Breast_SE_3264_14
Breast_SE_3264_15
Breast_SE_3264_6
Breast_SE_3264_8
Breast_SE_3266_4
Breast_SE_327_1
Breast_SE_327_2
Breast_SE_327_3
Breast_SE_329_4
Breast_SE_3308_5
Breast_SE_3310_12
Breast_SE_3370_2
Breast_SE_3411_14
Breast_SE_3428_7
Breast_SE_3434_1
Breast_SE_3476_4
Breast_SE_3508_4
Breast_SE_3513_8
Breast_SE_3531_10
Breast_SE_3536_1
Breast_SE_3552_15
Breast_SE_3610_2
Breast_SE_3611_1
Breast_SE_3632_6
Breast_SE_3632_7
Breast_SE_37_8
Breast_SE_3704_7
Breast_SE_3794_6
Breast_SE_3879_4
Breast_SE_3888_2
Breast_SE_3898_3
Breast_SE_4043_10
Breast_SE_4043_5
Breast_SE_4056_17
Breast_SE_4056_18
Breast_SE_4138_1
Breast_SE_4139_1
Breast_SE_416_15
Breast_SE_416_16
Breast_SE_4256_2
Breast_SE_428_4
Breast_SE_4282_2
Breast_SE_4333_11
Breast_SE_4333_7
Breast_SE_4333_9
Breast_SE_4334_6
Breast_SE_4334_7
Breast_SE_4353_2
Breast_SE_4353_3
Breast_SE_4399_5
Breast_SE_4430_4
Breast_SE_4434_25
Breast_SE_4495_25
Breast_SE_4501_1
Breast_SE_4526_11
Breast_SE_4558_4
Breast_SE_4585_2
Breast_SE_4590_7
Breast_SE_4651_3
Breast_SE_4656_2
Breast_SE_466_2
Breast_SE_4707_4
Breast_SE_4710_5
Breast_SE_4730_9
Breast_SE_4740_3
Breast_SE_476_1
Breast_SE_4760_10
Breast_SE_4760_11
Breast_SE_4816_10
Breast_SE_4816_9
Breast_SE_4857_19
Breast_SE_4858_1
Breast_SE_4862_12
Breast_SE_4862_13
Breast_SE_4863_21
Breast_SE_4863_22
Breast_SE_4867_13
Breast_SE_4867_15
Breast_SE_4867_18
Breast_SE_4867_44
Breast_SE_4867_45
Breast_SE_4867_48
Breast_SE_4872_5
Breast_SE_4881_7
Breast_SE_4882_2
Breast_SE_4899_3
Breast_SE_4899_4
Breast_SE_4980_4
Breast_SE_4980_6
Breast_SE_4993_15
Breast_SE_4994_20
Breast_SE_5018_8
Breast_SE_5021_13
Breast_SE_5021_14
Breast_SE_5021_6
Breast_SE_5025_5
Breast_SE_5084_2
Breast_SE_5084_3
Breast_SE_512_3
Breast_SE_5153_6
Breast_SE_5153_9
Breast_SE_5194_8
Breast_SE_5198_10
Breast_SE_5198_11
Breast_SE_5227_6
Breast_SE_5234_7
Breast_SE_5246_4
Breast_SE_5250_3
Breast_SE_5272_52
Breast_SE_5272_56
Breast_SE_5376_3
Breast_SE_5376_4
Breast_SE_5376_6
Breast_SE_5376_9
Breast_SE_5378_2
Breast_SE_5378_6
Breast_SE_538_3
Breast_SE_5423_3
Breast_SE_5423_5
Breast_SE_5423_6
Breast_SE_5438_20
Breast_SE_5444_1
Breast_SE_5467_3
Breast_SE_5581_1
Breast_SE_578_1
Breast_SE_604_10
Breast_SE_618_7
Breast_SE_619_3
Breast_SE_622_1
Breast_SE_622_5
Breast_SE_623_3
Breast_SE_64_3
Breast_SE_656_4
Breast_SE_660_14
Breast_SE_660_15
Breast_SE_660_5
Breast_SE_660_6
Breast_SE_674_1
Breast_SE_676_2
Breast_SE_760_5
Breast_SE_799_2
Breast_SE_799_4
Breast_SE_802_4
Breast_SE_816_7
Breast_SE_9_6
Breast_SE_922_3
Breast_SE_93_1
Breast_SE_953_5
Breast_SE_970_3
Breast_SE_981_5
Breast_SE_981_6
Breast_SE_981_9
Breast_SE_987_2
Breast_SE_989_5
Breast_SE_990_5
Breast_SE_993_8

## Sheet: Group 5
Cluster 5 SEs
Breast_SE_1004_4
Breast_SE_1120_1
Breast_SE_1177_2
Breast_SE_1223_5
Breast_SE_1253_5
Breast_SE_1261_2
Breast_SE_1265_4
Breast_SE_1301_6
Breast_SE_1638_4
Breast_SE_1661_2
Breast_SE_1668_3
Breast_SE_1943_5
Breast_SE_2164_3
Breast_SE_2260_21
Breast_SE_2284_3
Breast_SE_2290_6
Breast_SE_2353_5
Breast_SE_2479_6
Breast_SE_2487_6
Breast_SE_2487_7
Breast_SE_2527_2
Breast_SE_2551_3
Breast_SE_2562_4
Breast_SE_2580_3
Breast_SE_2637_3
Breast_SE_2694_1
Breast_SE_2732_1
Breast_SE_2771_2
Breast_SE_2777_1
Breast_SE_2929_2
Breast_SE_3122_4
Breast_SE_3125_5
Breast_SE_322_6
Breast_SE_3486_2
Breast_SE_3597_2
Breast_SE_3613_3
Breast_SE_3669_4
Breast_SE_3880_4
Breast_SE_4125_5
Breast_SE_4141_3
Breast_SE_4141_5
Breast_SE_4452_6
Breast_SE_4533_1
Breast_SE_5166_9
Breast_SE_5190_4
Breast_SE_566_9
Breast_SE_73_9
Breast_SE_786_8
Breast_SE_786_9
Breast_SE_903_4
Breast_SE_905_3

## Sheet: Group 6
Cluster 6 SEs
Breast_SE_10_11
Breast_SE_1189_4
Breast_SE_1205_1
Breast_SE_1221_17
Breast_SE_1279_3
Breast_SE_1283_5
Breast_SE_1330_3
Breast_SE_1563_1
Breast_SE_1604_2
Breast_SE_1675_2
Breast_SE_1902_2
Breast_SE_1904_2
Breast_SE_1904_3
Breast_SE_1904_4
Breast_SE_196_1
Breast_SE_2260_16
Breast_SE_2298_1
Breast_SE_2381_2
Breast_SE_244_11
Breast_SE_247_4
Breast_SE_2477_4
Breast_SE_2564_5
Breast_SE_2634_4
Breast_SE_2755_10
Breast_SE_2760_10
Breast_SE_3042_5
Breast_SE_3079_3
Breast_SE_309_1
Breast_SE_3110_13
Breast_SE_3131_4
Breast_SE_3131_7
Breast_SE_3249_2
Breast_SE_3265_2
Breast_SE_3420_2
Breast_SE_3421_1
Breast_SE_3502_9
Breast_SE_3521_27
Breast_SE_3521_32
Breast_SE_3563_2
Breast_SE_3578_3
Breast_SE_3578_5
Breast_SE_3603_7
Breast_SE_3638_3
Breast_SE_3654_5
Breast_SE_3680_4
Breast_SE_3691_6
Breast_SE_3708_6
Breast_SE_3710_1
Breast_SE_3771_3
Breast_SE_40_3
Breast_SE_4069_11
Breast_SE_4111_10
Breast_SE_415_4
Breast_SE_415_8
Breast_SE_42_3
Breast_SE_4225_14
Breast_SE_4225_15
Breast_SE_427_15
Breast_SE_4279_3
Breast_SE_4326_3
Breast_SE_433_5
Breast_SE_4353_5
Breast_SE_4368_2
Breast_SE_4407_4
Breast_SE_4424_2
Breast_SE_452_4
Breast_SE_4528_3
Breast_SE_4726_3
Breast_SE_4726_5
Breast_SE_475_1
Breast_SE_483_1
Breast_SE_4841_2
Breast_SE_4845_5
Breast_SE_4854_5
Breast_SE_4859_16
Breast_SE_4862_17
Breast_SE_4867_46
Breast_SE_4871_16
Breast_SE_498_2
Breast_SE_5014_28
Breast_SE_5021_12
Breast_SE_5182_1
Breast_SE_5202_3
Breast_SE_5272_35
Breast_SE_5272_40
Breast_SE_5272_41
Breast_SE_5280_10
Breast_SE_5328_6
Breast_SE_5358_7
Breast_SE_5359_2
Breast_SE_5371_10
Breast_SE_5420_10
Breast_SE_5439_29
Breast_SE_5463_3
Breast_SE_5475_9
Breast_SE_569_1
Breast_SE_595_3
Breast_SE_602_5
Breast_SE_639_10
Breast_SE_649_6
Breast_SE_649_8
Breast_SE_679_5
Breast_SE_954_4

## Sheet: Group 7
Cluster 7 SEs
Breast_SE_1_16
Breast_SE_1024_4
Breast_SE_1024_6
Breast_SE_1085_5
Breast_SE_1231_12
Breast_SE_1787_4
Breast_SE_1850_3
Breast_SE_2006_2
Breast_SE_2024_3
Breast_SE_2050_1
Breast_SE_2387_10
Breast_SE_2502_3
Breast_SE_2521_6
Breast_SE_2567_9
Breast_SE_2587_3
Breast_SE_27_14
Breast_SE_3_9
Breast_SE_3108_5
Breast_SE_3110_20
Breast_SE_3110_51
Breast_SE_3246_2
Breast_SE_3247_8
Breast_SE_3310_2
Breast_SE_3383_3
Breast_SE_3389_4
Breast_SE_3501_4
Breast_SE_3510_1
Breast_SE_3520_5
Breast_SE_3767_1
Breast_SE_3786_1
Breast_SE_4051_4
Breast_SE_4056_14
Breast_SE_4197_4
Breast_SE_4200_11
Breast_SE_4243_4
Breast_SE_4737_6
Breast_SE_4744_1
Breast_SE_4789_4
Breast_SE_4859_17
Breast_SE_4972_5
Breast_SE_4986_25
Breast_SE_4991_6
Breast_SE_4992_8
Breast_SE_5014_11
Breast_SE_5014_18
Breast_SE_5014_35
Breast_SE_5045_3
Breast_SE_5059_9
Breast_SE_5105_15
Breast_SE_5193_6
Breast_SE_5306_20
Breast_SE_5308_3
Breast_SE_5309_4
Breast_SE_5376_8
Breast_SE_5407_4
Breast_SE_5435_14
Breast_SE_5438_10
Breast_SE_5517_7
Breast_SE_5563_4
Breast_SE_5563_5
Breast_SE_5582_1
Breast_SE_573_5
Breast_SE_622_6
Breast_SE_744_1
Breast_SE_76_5
Breast_SE_799_3
Breast_SE_80_2
Breast_SE_926_5
Breast_SE_932_6
Breast_SE_993_3
