# Supplementary material for: Super-enhancer acquisition drives oncogene expression in triple negative breast cancer
Source: PLoS One. 2020 Jun 25;15(6):e0235343. doi: 10.1371/journal.pone.0235343 (PMC7316302; doi:10.1371/journal.pone.0235343)
Supplement: S4 Table — (XLSX) [file pone.0235343.s009.xlsx]

## Sheet: SE to gene correlations
Table S4: Superenhancer to gene correlations
SE_name	Gene # 1	Correlation	Gene # 2	Correlation	Gene #3	Correlation	Gene # 4	Correlation	Gene # 5	Correlation	Gene # 6	Correlation	Gene # 7	Correlation	Gene # 8	Correlation	Gene # 9	Correlation	Gene # 10	Correlation
Breast_SE_1	MIR200B	0.46	LINC01342	0.44	HES4	0.43	RNF223	0.42	LOC100288175	0.36	C1orf159	0.32	LINC01128	0.3	LOC100133331	0.29	LOC100288069	0.25	NOC2L	0.24
Breast_SE_2	SLC35E2B	0.49	GABRD	0.39	CDK11B	0.37	MMP23A	0.36	VWA1	0.36	TMEM52	0.33	MMP23B	0.31	NADK	0.28	ATAD3C	0.26	GNB1	0.19
Breast_SE_3	SKI	0.64	MMEL1	0.53	PANK4	0.5	NADK	0.47	LOC100996583	0.46	FAM213B	0.44	TNFRSF14	0.44	GNB1	0.43	HES5	0.4	RER1	0.39
Breast_SE_4	PRDM16	0.58	LINC00982	0.55	PEX10	0.31	TPRG1L	0.31	MEGF6	0.3	RER1	0.26	MMEL1	0.22	MIR551A	0.21	FAM213B	0.08	ACTRT2	0
Breast_SE_5	DFFB	0.54	TPRG1L	0.41	MEGF6	0.32	C1orf174	0.31	MIR551A	0.26	WRAP73	0.22	CEP104	0.17	CCDC27	0.17	SMIM1	0.07	TP73	0.06
Breast_SE_6	GPR153	0.53	TNFRSF25	0.5	HES2	0.5	PLEKHG5	0.42	MIR4252	0.41	ZBTB48	0.35	ESPN	0.34	ICMT	0.26	NOL9	0.2	ACOT7	0.19
Breast_SE_7	NOL9	0.58	PHF13	0.56	KLHL21	0.52	DNAJC11	0.41	ZBTB48	0.4	PLEKHG5	0.29	TNFRSF25	0.29	THAP3	0.26	ICMT	0.26	TAS1R1	0.21
Breast_SE_8	VAMP3	0.41	PARK7	0.39	CAMTA1	0.35	THAP3	0.24	NOL9	0.15	UTS2	0.12	PHF13	0.08	ERRFI1	0.07	DNAJC11	0.06	LOC102725193	0
Breast_SE_9	CAMTA1	0.42	PARK7	0.42	VAMP3	0.38	SLC45A1	0.36	TNFRSF9	0.18	PHF13	0.11	LOC102725193	0	TAS1R1	0	UTS2	0	NOL9	0
Breast_SE_10	ERRFI1	0.77	H6PD	0.61	SLC45A1	0.43	ENO1-AS1	0.31	CA6	0.29	SLC2A5	0.25	SLC2A7	0.24	RERE	0.23	ENO1	0.22	LOC102724552	0.2
Breast_SE_11	LOC102724552	0.7	RERE	0.6	SLC45A1	0.47	PER3	0.46	CA6	0.37	SLC2A5	0.31	H6PD	0.26	VAMP3	0.23	GPR157	0.18	MIR6728	0.15
Breast_SE_12	SLC45A1	0.73	CA6	0.72	ENO1-AS1	0.53	H6PD	0.51	ENO1	0.48	MIR6728	0.47	SLC2A5	0.47	ERRFI1	0.36	LOC100506022	0.35	RERE	0.31
Breast_SE_13	GPR157	0.58	RERE	0.49	ENO1-AS1	0.41	LOC102724552	0.39	SLC45A1	0.3	H6PD	0.27	CLSTN1	0.24	SLC2A5	0.24	LZIC	0.19	SLC2A7	0.15
Breast_SE_14	H6PD	0.21	SPSB1	0.2	SLC25A33	0.17	LOC100506022	0.15	CTNNBIP1	0.14	RBP7	0.14	SLC2A5	0.11	NMNAT1	0.07	MIR5697	0.03	LZIC	0.01
Breast_SE_15	GPR157	0.54	CTNNBIP1	0.46	MIR1273D	0.44	CLSTN1	0.36	MIR34A	0.23	H6PD	0.22	RNU6-1	0.11	PIK3CD	0.08	RNU6-2	0.08	MIR5697	0.03
Breast_SE_17	CORT	0.47	PGD	0.47	TARDBP	0.31	CASZ1	0.25	MIR5697	0.24	C1orf127	0.22	KIF1B	0.19	RBP7	0.07	RNU6-2	0.04	NMNAT1	0.03
Breast_SE_18	RNU6-8	0.35	NMNAT1	0.26	RNU6-7	0.24	LZIC	0.17	CORT	0.15	DFFA	0.05	MIR5697	0.03	MIR1273D	0.02	RNU6-9	0.01	PEX14	0
Breast_SE_19	CASZ1	0.71	RNU6-2	0.51	CORT	0.45	C1orf127	0.38	MASP2	0.26	RNU6-1	0.24	MTOR-AS1	0.23	TARDBP	0.21	KIF1B	0.15	MTOR	0.09
Breast_SE_20	RNU6-2	0.59	CASZ1	0.56	C1orf127	0.38	RNU6-8	0.32	RNU6-7	0.2	RNU6-9	0.19	CORT	0.16	RNU6-1	0.16	MIR1273D	0.12	MTOR-AS1	0.1
Breast_SE_21	CORT	0.65	DRAXIN	0.62	C1orf127	0.5	MAD2L2	0.28	FBXO6	0.28	MASP2	0.2	EXOSC10	0.18	FBXO44	0.15	PGD	0.09	FBXO2	0.03
Breast_SE_22	PEX14	0.43	FBXO2	0.34	FBXO44	0.31	AGTRAP	0.26	DRAXIN	0.24	MTOR	0.2	EXOSC10	0.14	SRM	0.12	MTOR-AS1	0.08	MAD2L2	0.05
Breast_SE_23	FBXO2	0.48	FBXO44	0.47	MAD2L2	0.45	KIAA2013	0.37	MIIP	0.36	AGTRAP	0.35	DRAXIN	0.32	UBIAD1	0.31	MFN2	0.29	NPPA-AS1	0.24
Breast_SE_24	CLCN6	0.36	NPPA-AS1	0.36	NPPA	0.32	MIR6729	0.23	C1orf167	0.2	PLOD1	0.18	KIAA2013	0.18	MTHFR	0.16	LOC102724659	0.16	AGTRAP	0.11
Breast_SE_25	PLOD1	0.43	CLCN6	0.42	NPPA-AS1	0.41	FBXO44	0.37	MIIP	0.36	MIR6729	0.36	RNU5E-1	0.32	KIAA2013	0.3	MFN2	0.28	FBXO2	0.28
Breast_SE_26	TNFRSF1B	0.61	MIR4632	0.56	MIR7846	0.45	CLCN6	0.33	NPPA-AS1	0.33	MIIP	0.3	PLOD1	0.27	LOC102724659	0.22	MFN2	0.21	MIR6729	0.2
Breast_SE_27	DHRS3	0.78	MIR6730	0.78	MIIP	0.38	AADACL3	0.33	MIR7846	0.26	MIR6729	0.25	TNFRSF1B	0.19	PRAMEF1	0.19	TNFRSF8	0.19	MIR4632	0.18
Breast_SE_28	PDPN	0.71	PRAMEF15	0.29	PRAMEF10	0.26	PRAMEF19	0.26	PRAMEF17	0	PRAMEF8	0	PRAMEF22	0	PRAMEF9	0	PRAMEF25	0	PRAMEF26	0
Breast_SE_30	KAZN	0.71	CASP9	0.41	TMEM51-AS1	0.39	CELA2A	0.31	SLC25A34	0.29	CTRC	0.27	DDI2	0.18	RSC1A1	0.16	DNAJC16	0.13	AGMAT	0.1
Breast_SE_31	CELA2A	0.58	CTRC	0.54	SLC25A34	0.42	TMEM51-AS1	0.31	DDI2	0.28	CELA2B	0.26	RSC1A1	0.25	PLEKHM2	0.16	KAZN	0.14	LOC101927417	0.11
Breast_SE_32	TMEM51	0.73	TMEM51-AS1	0.37	CELA2A	0.2	FBLIM1	0.14	TMEM82	0.1	C1orf195	0.07	FHAD1	0.07	LOC101927417	0.06	UQCRHL	0.05	DDI2	0.05
Breast_SE_33	EFHD2	0.52	CASP9	0.36	CELA2B	0.36	CTRC	0.3	LOC101927417	0.3	FHAD1	0.3	C1orf195	0.23	SLC25A34	0.23	PLEKHM2	0.19	FLJ37453	0.14
Breast_SE_34	EFHD2	0.73	UQCRHL	0.57	PLEKHM2	0.26	DNAJC16	0.17	CELA2B	0.13	C1orf195	0.11	TMEM51	0.11	FBLIM1	0.09	TMEM82	0.09	FHAD1	0.09
Breast_SE_35	CASP9	0.46	CELA2B	0.4	CTRC	0.36	FLJ37453	0.32	DDI2	0.3	RSC1A1	0.3	ZBTB17	0.18	SPEN	0.17	AGMAT	0.15	SLC25A34	0.12
Breast_SE_36	PLEKHM2	0.6	FBLIM1	0.56	DNAJC16	0.48	SPEN	0.45	EFHD2	0.38	TMEM82	0.35	HSPB7	0.33	SLC25A34	0.28	ZBTB17	0.25	AGMAT	0.24
Breast_SE_37	EPHA2	0.61	PLEKHM2	0.55	FAM131C	0.36	SZRD1	0.36	FBXO42	0.27	FBLIM1	0.21	FLJ37453	0.19	SLC25A34	0.13	HSPB7	0.13	RSC1A1	0.12
Breast_SE_38	CROCCP2	0.43	CROCCP3	0.36	CROCC	0.32	RNVU1-18	0.3	RNU1-1	0.3	NBPF1	0.29	MST1L	0.19	SPATA21	0.15	SZRD1	0.12	MST1P2	0.11
Breast_SE_39	MST1L	0.38	MFAP2	0.36	CROCCP2	0.36	CROCC	0.27	NBPF1	0.19	LOC400743	0.18	SDHB	0.11	ESPNP	0.07	ATP13A2	0.04	FAM231A	0
Breast_SE_40	RCC2	0.46	PADI1	0.36	CROCCP2	0.33	LOC400743	0.3	PADI2	0.29	MST1P2	0.26	ATP13A2	0.21	PADI3	0.17	CROCC	0.14	ESPNP	0.14
Breast_SE_41	PADI2	0.63	ARHGEF10L	0.49	RCC2	0.45	ESPNP	0.45	IGSF21	0.43	PADI3	0.4	MIR3972	0.38	CROCC	0.27	MST1L	0.27	ACTL8	0.21
Breast_SE_42	ARHGEF10L	0.76	ESPNP	0.25	ACTL8	0.21	IGSF21	0.09	PADI4	0.09	RCC2	0.07	PADI6	0.02	SDHB	0.02	PADI3	0	FAM231A	0
Breast_SE_43	SDHB	0.33	ACTL8	0.16	MFAP2	0.15	FAM231A	0	ARHGEF10L	-0.1	CROCC	-0.1	IGSF21	-0.1	PADI4	-0.1	PADI6	-0.1	PADI1	-0.1
Breast_SE_45	KLHDC7A	0.89	IGSF21	0.49	ALDH4A1	0.47	AKR7A3	0.47	LOC100506730	0.42	AKR7L	0.39	ARHGEF10L	0.29	PAX7	0.28	AKR7A2	0.24	PQLC2	0
Breast_SE_46	IFFO2	0.57	ALDH4A1	0.41	MINOS1	0.38	MINOS1-NBL1	0.34	MIR1290	0.32	RPS14P3	0.26	EMC1	0.26	LOC101927895	0.25	CAPZB	0.21	AKR7A2	0.18
Breast_SE_47	IFFO2	0.5	MIR1290	0.35	UBR4	0.29	TAS1R2	0.27	ALDH4A1	0.23	MIR4695	0.21	LOC100506730	0.12	LOC101927895	0.1	EMC1	0.08	RPS14P3	0
Breast_SE_48	ALDH4A1	0.34	MINOS1	0.34	MIR1290	0.19	TAS1R2	0.18	AKR7A2	0.14	HTR6	0.1	LOC100506730	0.08	AKR7L	0.02	UBR4	0.01	AKR7A3	0
Breast_SE_49	AKR7A3	0.75	AKR7L	0.65	AKR7A2	0.61	PQLC2	0.58	CAPZB	0.56	MINOS1	0.55	LOC100506730	0.47	ALDH4A1	0.28	MRTO4	0.16	HTR6	0.15
Breast_SE_51	TMCO4	0.89	MINOS1	0.28	PLA2G2C	0.26	CAPZB	0.23	PLA2G5	0.18	RNF186	0.14	UBXN10	0.14	LOC100506730	0.13	PLA2G2D	0.13	OTUD3	0.1
Breast_SE_52	CAMK2N1	0.46	PLA2G2C	0.45	TMCO4	0.41	UBXN10	0.41	UBXN10-AS1	0.35	PLA2G2A	0.31	PLA2G2F	0.3	VWA5B1	0.25	LINC01141	0.17	RNF186	0.15
Breast_SE_53	CAMK2N1	0.68	PLA2G2F	0.36	CDA	0.28	UBXN10	0.25	LINC01141	0.24	UBXN10-AS1	0.2	PLA2G5	0.18	MUL1	0.17	PINK1	0.14	PINK1-AS	0.12
Breast_SE_54	PINK1	0.75	PINK1-AS	0.64	MIR6084	0.56	CDA	0.48	MUL1	0.26	HP1BP3	0.25	FAM43B	0.22	MIR1256	0.22	DDOST	0.17	EIF4G3	0.14
Breast_SE_55	SH2D5	0.9	DDOST	0.56	KIF17	0.54	MUL1	0.5	ECE1	0.48	PINK1-AS	0.47	CDA	0.45	EIF4G3	0.38	PINK1	0.3	MIR6084	0.09
Breast_SE_56	PINK1	0.54	HP1BP3	0.44	NBPF3	0.42	PINK1-AS	0.4	MIR6084	0.39	ECE1	0.31	RAP1GAP	0.29	HSPG2	0.22	LOC100506801	0.18	MIR1256	0.15
Breast_SE_58	RAP1GAP	0.85	NBPF3	0.63	WNT4	0.36	CDC42	0.2	MIR1256	0.18	LINC00339	0.17	ALPL	0.03	USP48	0	MIR4418	0	LOC100506801	0
Breast_SE_59	USP48	0.63	LOC100506801	0.48	ZBTB40	0.38	LINC00339	0.36	EPHA8	0.33	HSPG2	0.26	LDLRAD2	0.26	ALPL	0.18	CELA3A	0.16	ECE1	0.16
Breast_SE_60	HSPG2	0.72	LDLRAD2	0.68	ZBTB40	0.58	CELA3A	0.44	CELA3B	0.4	USP48	0.4	ECE1	0.38	LOC100506801	0.37	LINC00339	0.29	MIR1256	0.22
Breast_SE_62	MIR4253	0.67	EPHB2	0.64	HTR1D	0.15	EPHA8	0.14	LUZP1	0.12	ZBTB40	0.1	WNT4	0.06	MIR4684	0.05	ZNF436	0.02	MIR6127	0
Breast_SE_64	LUZP1	0.68	MIR4253	0.53	HTR1D	0.47	EPHB2	0.45	ID3	0.29	MIR4684	0.25	KDM1A	0.23	C1QB	0.09	C1QC	0.09	HNRNPR	0.07
Breast_SE_65	ASAP3	0.64	ID3	0.61	E2F2	0.47	LOC101928163	0.4	TCEA3	0.34	MIR4419A	0.31	LINC01355	0.2	HMGCL	0.17	HNRNPR	0.17	ZNF436	0.13
Breast_SE_66	GALE	0.63	FUCA1	0.29	TCEA3	0.25	RPL11	0.22	LYPLA2	0.21	ID3	0.18	PITHD1	0.17	HMGCL	0.15	ASAP3	0.13	IL22RA1	0.01
Breast_SE_67	E2F2	0.55	LOC101928163	0.47	ID3	0.33	CNR2	0.19	GRHL3	0.18	HMGCL	0.18	LOC284632	0.16	SRSF10	0.16	FUCA1	0.13	PNRC2	0.09
Breast_SE_69	GRHL3	0.47	IL22RA1	0.36	SRRM1	0.36	RCAN3AS	0.34	IFNLR1	0.33	NCMAP	0.31	PNRC2	0.26	RCAN3	0.24	LOC284632	0.23	CNR2	0.16
Breast_SE_70	NIPAL3	0.77	RCAN3	0.53	LOC100506985	0.52	SRRM1	0.49	STPG1	0.4	RCAN3AS	0.36	LOC284632	0.3	FUCA1	0.24	NCMAP	0.22	GRHL3	0.21
Breast_SE_72	CLIC4	0.5	SRRM1	0.49	SYF2	0.44	RSRP1	0.38	NIPAL3	0.36	RCAN3AS	0.29	NCMAP	0.27	MIR4425	0.23	RHD	0.15	LOC284632	0.13
Breast_SE_73	RUNX3	0.7	MIR6731	0.57	TMEM50A	0.46	RCAN3	0.45	STPG1	0.44	LOC100506985	0.43	RHD	0.4	RCAN3AS	0.36	MIR4425	0.31	NIPAL3	0.27
Breast_SE_75	LOC646471	0.44	MTFR1L	0.43	RSRP1	0.38	STMN1	0.36	SRRM1	0.33	RHD	0.27	CLIC4	0.26	LDLRAP1	0.25	SYF2	0.22	TMEM50A	0.19
Breast_SE_76	LDLRAP1	0.71	PAFAH2	0.69	MAN1C1	0.51	TRIM63	0.47	SLC30A2	0.34	TMEM57	0.3	MIR4425	0.28	RHCE	0.25	RSRP1	0.25	RHD	0.14
Breast_SE_77	MAN1C1	0.64	PDIK1L	0.62	SLC30A2	0.61	TRIM63	0.58	PAFAH2	0.58	LDLRAP1	0.42	TMEM57	0.4	STMN1	0.27	FAM110D	0.24	MTFR1L	0.23
Breast_SE_78	PAQR7	0.67	FAM110D	0.33	AUNIP	0.31	MTFR1L	0.23	STMN1	0.2	LOC646471	0.17	LDLRAP1	0.13	SLC30A2	0.12	CNKSR1	0.1	SH3BGRL3	0.04
Breast_SE_79	PDIK1L	0.77	EXTL1	0.58	UBXN11	0.46	CNKSR1	0.42	LOC646471	0.39	FAM110D	0.36	SLC30A2	0.35	CATSPER4	0.33	TRIM63	0.3	CEP85	0.3
Breast_SE_80	UBXN11	0.62	LOC101928324	0.51	LIN28A	0.45	CEP85	0.44	DHDDS	0.39	SH3BGRL3	0.37	HMGN2	0.35	CD52	0.31	RPS6KA1	0.29	ZNF683	0.24
Breast_SE_81	ARID1A	0.65	RPS6KA1	0.61	LOC101928324	0.57	CEP85	0.51	CNKSR1	0.51	FAM110D	0.46	ZDHHC18	0.43	UBXN11	0.4	LOC101928728	0.32	LIN28A	0.31
Breast_SE_82	ARID1A	0.66	LOC101928728	0.6	HMGN2	0.56	ZDHHC18	0.35	LOC101928324	0.29	UBXN11	0.2	PIGV	0.08	SH3BGRL3	0.06	DHDDS	0.05	NR0B2	0.03
Breast_SE_83	ARID1A	0.63	ZDHHC18	0.53	PIGV	0.41	GPN2	0.38	LOC101928728	0.38	LOC101928324	0.35	HMGN2	0.35	DHDDS	0.3	RPS6KA1	0.26	NR0B2	0.23
Breast_SE_84	KDF1	0.69	SYTL1	0.55	FAM46B	0.53	SFN	0.43	RPS6KA1	0.36	LOC101928728	0.32	WDTC1	0.28	ZDHHC18	0.26	PIGV	0.24	MIR1976	0.2
Breast_SE_85	SYTL1	0.5	WDTC1	0.48	CD164L2	0.38	KDF1	0.3	FCN3	0.3	SLC9A1	0.29	FAM46B	0.27	PIGV	0.22	ARID1A	0.15	MAP3K6	0.13
Breast_SE_86	FAM76A	0.64	FCN3	0.44	WDTC1	0.42	WASF2	0.4	FGR	0.33	TMEM222	0.31	IFI6	0.3	CD164L2	0.28	GPATCH3	0.28	SLC9A1	0.28
Breast_SE_87	THEMIS2	0.55	GPR3	0.34	MED18	0.33	ATPIF1	0.25	DNAJC8	0.25	WASF2	0.22	FAM76A	0.19	PPP1R8	0.17	AHDC1	0.13	RPA2	0.13
Breast_SE_88	FAM76A	0.35	THEMIS2	0.34	PPP1R8	0.26	ATPIF1	0.26	PHACTR4	0.23	RPA2	0.18	XKR8	0.18	FGR	0.14	SMPDL3B	0.09	SCARNA1	0.05
Breast_SE_90	PHACTR4	0.65	ATPIF1	0.59	MED18	0.58	SESN2	0.48	SNHG3	0.46	SNORA16A	0.4	SNHG12	0.38	SNORA61	0.36	SNORA44	0.23	TRNAU1AP	0.22
Breast_SE_91	ATPIF1	0.54	PHACTR4	0.48	SNHG3	0.4	MED18	0.35	SNORA61	0.3	SNORA16A	0.25	SNHG12	0.19	SNORA73A	0.17	SNORA44	0.16	SNORD99	0.13
Breast_SE_92	PHACTR4	0.53	MED18	0.36	RNU11	0.35	RAB42	0.33	SNORA61	0.32	SNHG3	0.31	ATPIF1	0.3	SNHG12	0.23	TRNAU1AP	0.19	SNORA44	0.15
Breast_SE_93	TMEM200B	0.75	TRNAU1AP	0.53	RCC1	0.5	SNORA73B	0.47	MECR	0.34	RAB42	0.26	YTHDF2	0.23	SRSF4	0.2	SNORA44	0.19	SNORA73A	0.17
Breast_SE_94	PTPRU	0.7	SNORA61	0.53	SNHG12	0.43	SRSF4	0.39	SNORA16A	0.38	OPRD1	0.35	RAB42	0.32	SNORA73A	0.29	SNORD99	0.26	RCC1	0.22
Breast_SE_95	LAPTM5	0.73	MIR4420	0.49	SNORD99	0.42	PTPRU	0.37	SNORA44	0.36	SNHG12	0.32	SNORA16A	0.29	SNORA61	0.29	TMEM200B	0.27	MATN1-AS1	0.18
Breast_SE_96	SDC3	0.59	MATN1	0.58	MATN1-AS1	0.56	LAPTM5	0.53	MIR4420	0.33	COL16A1	0.26	MIR4254	0.25	SERINC2	0.11	LINC01226	0.09	LINC01225	0.08
Breast_SE_97	SDC3	0.41	MATN1-AS1	0.39	LAPTM5	0.32	MIR4254	0.3	MATN1	0.29	MIR4420	0.25	SNORD103B	0.19	SNORD103A	0.09	SERINC2	0.07	PUM1	0.06
Breast_SE_99	SERINC2	0.81	TINAGL1	0.46	LINC01226	0.26	LINC01225	0.24	HCRTR1	0.16	MIR4254	0.12	SNORD103A	0.12	NKAIN1	0.1	SNORD103B	0.06	FABP3	0.02
Breast_SE_100	LINC01226	0.44	LINC01225	0.41	MIR4254	0.4	SERINC2	0.35	NKAIN1	0.21	SNORD103B	0.03	PTP4A2	0	SNORD103A	0	SPOCD1	0	TINAGL1	0
Breast_SE_101	TINAGL1	0.66	SNORD103B	0.45	KPNA6	0.42	SERINC2	0.36	ZCCHC17	0.35	HCRTR1	0.25	COL16A1	0.21	PEF1	0.21	SNORD103A	0.17	SNRNP40	0.14
Breast_SE_102	COL16A1	0.61	TMEM39B	0.58	KHDRBS1	0.54	KPNA6	0.48	PEF1	0.48	CCDC28B	0.47	PTP4A2	0.44	SPOCD1	0.43	ZCCHC17	0.35	TXLNA	0.35
Breast_SE_103	CCDC28B	0.6	TXLNA	0.5	MTMR9LP	0.5	SPOCD1	0.45	DCDC2B	0.42	TMEM39B	0.37	PTP4A2	0.36	IQCC	0.35	MIR4254	0.26	KPNA6	0.21
Breast_SE_104	CCDC28B	0.63	MTMR9LP	0.56	TXLNA	0.55	MARCKSL1	0.53	FAM167B	0.53	KHDRBS1	0.48	KPNA6	0.4	TSSK3	0.36	MIR5585	0.31	PTP4A2	0.23
Breast_SE_105	TXLNA	0.53	CCDC28B	0.51	MTMR9LP	0.5	KPNA6	0.47	KHDRBS1	0.43	HDAC1	0.41	MARCKSL1	0.34	TSSK3	0.34	TMEM39B	0.34	FAM167B	0.34
Breast_SE_106	MARCKSL1	0.78	MTMR9LP	0.52	ZBTB8A	0.43	BSDC1	0.34	TSSK3	0.34	IQCC	0.3	CCDC28B	0.3	FAM229A	0.29	HDAC1	0.29	TXLNA	0.21
Breast_SE_107	KIAA1522	0.66	MARCKSL1	0.58	RBBP4	0.55	BSDC1	0.54	ZBTB8OS	0.49	SYNC	0.49	S100PBP	0.47	ZBTB8A	0.34	HDAC1	0.28	TSSK3	0.27
Breast_SE_108	AZIN2	0.5	MIR3605	0.35	PHC2	0.33	YARS	0.23	LOC101929464	0.2	AK2	0.18	A3GALT2	0.16	ZNF362	0.07	ZBTB8B	0.07	FNDC5	0.07
Breast_SE_109	TRIM62	0.62	FNDC5	0.29	A3GALT2	0.26	ZBTB8OS	0.26	LOC101929464	0.23	ZNF362	0.2	SYNC	0.13	HPCA	0.11	KIAA1522	0.05	AZIN2	0.03
Breast_SE_110	LOC101929464	0.61	TMEM54	0.36	TRIM62	0.33	KIAA1522	0.33	ZBTB8OS	0.26	A3GALT2	0.25	ZNF362	0.21	HPCA	0.2	PHC2	0.12	SYNC	0.11
Breast_SE_111	GJB3	0.81	GJB5	0.73	GJA4	0.62	GJB4	0.52	PSMB2	0.33	LOC653160	0.31	NCDN	0.29	CSMD2-AS1	0.28	SFPQ	0.18	SMIM12	0.16
Breast_SE_112	KIAA0319L	0.65	AGO4	0.5	ZMYM6	0.34	ZMYM4	0.26	NCDN	0.23	C1orf216	0.16	LOC653160	0.15	ZMYM1	0.11	TRAPPC3	0.1	ADPRHL2	0.1
Breast_SE_113	C1orf216	0.54	THRAP3	0.53	CLSPN	0.52	STK40	0.5	AGO4	0.45	MAP7D1	0.44	ADPRHL2	0.43	SH3D21	0.42	AGO3	0.38	TRAPPC3	0.38
Breast_SE_115	MIR6732	0.48	INPP5B	0.46	MEAF6	0.39	EPHA10	0.38	GNL2	0.34	RSPO1	0.33	SNIP1	0.3	LINC01137	0.29	ZC3H12A	0.26	MIR5581	0.24
Breast_SE_116	FHL3	0.79	SF3A3	0.4	GNL2	0.35	CDCA8	0.27	MIR5581	0.26	DNALI1	0.22	MIR6732	0.2	C1orf109	0.13	POU3F1	0.13	INPP5B	0.12
Breast_SE_117	MACF1	0.57	LOC101929516	0.38	KIAA0754	0.36	PABPC4	0.35	NDUFS5	0.15	PPIE	0.15	RRAGC	0.11	SNORA55	0.09	OXCT2	0.08	AKIRIN1	0.05
Breast_SE_118	KIAA0754	0.77	PABPC4	0.54	LOC101929516	0.53	NDUFS5	0.44	AKIRIN1	0.43	TRIT1	0.39	PPIE	0.32	SNORA55	0.27	GJA9	0.22	OXCT2	0.08
Breast_SE_119	MYCL	0.76	BMP8A	0.16	BMP8B	0.15	PPIEL	0.1	NT5C1A	0.08	OXCT2	0.08	TRIT1	0.08	TMCO2	0.04	SNORA55	0.03	RLF	0.01
Breast_SE_120	PPIEL	0.38	PPT1	0.27	LOC101929536	0.23	MYCL	0.21	MFSD2A	0.19	BMP8B	0.18	SNORA55	0.14	RLF	0.04	TMCO2	0.01	ZMPSTE24	0
Breast_SE_121	COL9A2	0.5	MIR30E	0.36	TMCO2	0.35	KCNQ4	0.3	ZFP69B	0.24	RIMS3	0.23	EXO5	0.12	NFYC	0.08	ZNF684	0.08	SMAP2	0.04
Breast_SE_124	CITED4	0.65	NFYC-AS1	0.61	SLFNL1-AS1	0.54	MIR30E	0.41	KCNQ4	0.39	NFYC	0.34	FOXO6	0.33	SCMH1	0.26	RIMS3	0.24	TMCO2	0.1
Breast_SE_125	FOXO6	0.76	EDN2	0.54	RIMS3	0.42	LOC101929901	0.41	SLFNL1-AS1	0.39	ZFP69	0.39	SCMH1	0.35	ZNF684	0.34	NFYC	0.34	MIR30E	0.33
Breast_SE_127	EDN2	0.43	FOXO6	0.31	SLFNL1-AS1	0.26	CCDC30	0.25	SLFNL1	0.25	RIMKLA	0.24	SCMH1	0.21	HIVEP3	0.17	LOC101929901	0.17	PPIH	0.15
Breast_SE_129	SLC2A1	0.49	SLC2A1-AS1	0.47	MPL	0.35	CDC20	0.23	FAM183A	0.19	TMEM125	0.12	PPIH	0.11	MIR6733	0.1	ZNF691	0.07	C1orf210	0.06
Breast_SE_130	TMEM125	0.48	C1orf210	0.38	LOC339539	0.29	MPL	0.23	CLDN19	0.22	ERMAP	0.16	MIR6734	0.14	SLC2A1	0.09	FAM183A	0.06	CDC20	0.04
Breast_SE_132	SZT2	0.58	HYI	0.55	MIR6733	0.45	KDM4A	0.36	EBNA1BP2	0.34	ST3GAL3	0.34	KDM4A-AS1	0.33	MPL	0.32	PTPRF	0.3	MIR6734	0.27
Breast_SE_133	C1orf210	0.68	PTPRF	0.62	TMEM125	0.61	MPL	0.4	HYI	0.32	KDM4A	0.3	SZT2	0.28	KDM4A-AS1	0.28	FAM183A	0.13	MIR6734	0.1
Breast_SE_134	SLC6A9	0.71	DMAP1	0.67	ST3GAL3	0.64	B4GALT2	0.56	IPO13	0.53	SZT2	0.5	MIR6735	0.48	ARTN	0.45	ERI3	0.38	KLF17	0.33
Breast_SE_136	KIF2C	0.52	BTBD19	0.48	HECTD3	0.45	RPS8	0.42	UROD	0.39	TMEM53	0.38	SNORD38A	0.38	EIF2B3	0.38	SNORD46	0.35	PLK3	0.35
Breast_SE_137	LINC01144	0.48	HPDL	0.41	TESK2	0.27	NASP	0.26	GPBP1L1	0.23	MAST2	0.22	IPP	0.21	CCDC17	0.13	MUTYH	0.12	MMACHC	0.04
Breast_SE_138	PIK3R3	0.57	TESK2	0.49	ZSWIM5	0.36	LINC01144	0.34	NASP	0.33	IPP	0.27	GPBP1L1	0.26	CCDC17	0.26	AKR1A1	0.26	HPDL	0.2
Breast_SE_139	NASP	0.42	IPP	0.37	PIK3R3	0.35	LOC101929626	0.31	GPBP1L1	0.29	LINC01144	0.28	TESK2	0.25	AKR1A1	0.18	RPS15AP10	0.18	CCDC17	0.18
Breast_SE_140	NASP	0.42	IPP	0.37	PIK3R3	0.35	LOC101929626	0.31	GPBP1L1	0.29	LINC01144	0.28	TESK2	0.25	RPS15AP10	0.18	AKR1A1	0.18	CCDC17	0.18
Breast_SE_141	PIK3R3	0.67	LOC101929626	0.61	IPP	0.31	MAST2	0.28	RAD54L	0.17	LINC01398	0.16	FAAHP1	0.16	UQCRH	0.15	LRRC41	0.1	NSUN4	0
Breast_SE_142	PIK3R3	0.71	LOC101929626	0.7	TSPAN1	0.39	MAST2	0.32	FAAHP1	0.3	LINC01398	0.25	MKNK1-AS1	0.21	MKNK1	0.17	RAD54L	0.13	IPP	0.1
Breast_SE_143	LRRC41	0.62	RAD54L	0.49	UQCRH	0.49	NSUN4	0.38	ATPAF1	0.19	PIK3R3	0.13	LOC101929626	0.11	TEX38	0.09	LURAP1	0.07	FAAH	0.05
Breast_SE_144	FAAH	0.84	CYP4B1	0.62	LINC00853	0.6	CYP4Z2P	0.6	CYP4X1	0.5	CYP4Z1	0.49	TEX38	0.45	LINC01398	0.42	FAAHP1	0.33	CYP4A11	0.32
Breast_SE_145	CYP4B1	0.73	FAAH	0.64	LINC00853	0.64	CYP4Z2P	0.6	TEX38	0.56	CYP4Z1	0.55	PDZK1IP1	0.5	CYP4A22	0.47	CYP4X1	0.46	CYP4A11	0.45
Breast_SE_146	PDZK1IP1	0.75	CYP4A22	0.5	FOXD2	0.49	CYP4X1	0.48	CYP4B1	0.45	ATPAF1	0.4	CYP4A11	0.36	CMPK1	0.36	LINC00853	0.34	STIL	0.34
Breast_SE_148	PDZK1IP1	0.43	CYP4A22	0.4	CYP4A11	0.35	CYP4B1	0.27	CMPK1	0.24	EFCAB14	0.22	ATPAF1	0.21	CYP4X1	0.21	FOXD2	0.19	LINC00853	0.15
Breast_SE_150	FOXE3	0.97	FOXD2	0.61	TRABD2B	0.51	FOXD2-AS1	0.39	SPATA6	0.28	PDZK1IP1	0.21	CYP4X1	0.17	LINC00853	0.09	CYP4Z1	0.08	TAL1	0.07
Breast_SE_152	CDKN2C	0.81	C1orf185	0.79	MIR4421	0.41	MIR6500	0.33	RNF11	0.3	MIR761	0.25	OSBPL9	0.21	CC2D1B	0.14	FAF1	0.14	BTF3L4	0.12
Breast_SE_153	TTC39A-AS1	0.72	TTC39A	0.66	MIR4421	0.03	MIR6500	0.03	RNF11	0	FAF1	0	EPS15	0	CDKN2C	-0.1	CC2D1B	-0.1	PRPF38A	-0.1
Breast_SE_154	MIR761	0.29	TTC39A-AS1	0.2	TTC39A	0.17	CDKN2C	0.17	MIR4421	0.12	OSBPL9	0.11	RNF11	0.01	C1orf185	0	CC2D1B	0	GPX7	-0.1
Breast_SE_159	C1orf123	0.6	PODN	0.56	SLC1A7	0.54	GPX7	0.49	GLIS1	0.38	SCP2	0.36	COA7	0.25	ECHDC2	0.21	MIR1273G	0.16	ZYG11B	0.15
Breast_SE_160	LRP8	0.67	LOC100507564	0.57	NDC1	0.53	ZYG11B	0.5	MAGOH	0.5	C1orf123	0.42	COA7	0.41	CPT2	0.36	YIPF1	0.27	SCP2	0.24
Breast_SE_161	SLC1A7	0.58	PODN	0.56	DMRTB1	0.44	GLIS1	0.4	TMEM59	0.31	YIPF1	0.31	HSPB11	0.28	C1orf123	0.23	TCEANC2	0.19	DIO1	0.19
Breast_SE_162	GLIS1	0.97	HSPB11	0.31	TMEM59	0.28	DMRTB1	0.22	LRRC42	0.22	TCEANC2	0.2	MRPL37	0	LOC100507564	0	LRP8	0	MAGOH	-0.1
Breast_SE_163	SSBP3	0.8	SSBP3-AS1	0.65	PARS2	0.27	MROH7	0.27	MIR4781	0.25	CDCP2	0.2	DIO1	0.14	YIPF1	0.1	CYB5RL	0.03	TCEANC2	0.02
Breast_SE_164	SSBP3	0.61	SSBP3-AS1	0.51	MRPL37	0.37	CYB5RL	0.35	CDCP2	0.24	LDLRAD1	0.2	MROH7	0.17	DHCR24	0.07	TMEM61	0	TMEM59	0
Breast_SE_165	DHCR24	0.46	CDCP2	0.37	BSND	0.27	MIR4781	0.24	SSBP3-AS1	0.21	TMEM61	0.19	CYB5RL	0.17	LOC100507634	0.16	MROH7	0.15	PCSK9	0.07
Breast_SE_166	USP24	0.54	MROH7	0.37	SSBP3-AS1	0.35	MROH7-TTC4	0.32	MRPL37	0.28	TTC22	0.27	PARS2	0.27	CYB5RL	0.22	DHCR24	0.18	LOC100507634	0.17
Breast_SE_168	LOC100507634	0.48	C8B	0.35	USP24	0.27	TTC4	0.14	MROH7-TTC4	0.13	PRKAA2	0.1	ACOT11	0.09	FAM151A	0.08	PCSK9	0.06	MIR4422	0
Breast_SE_169	MROH7	0.68	TTC22	0.59	USP24	0.47	LOC101929935	0.4	DHCR24	0.3	SSBP3-AS1	0.26	PCSK9	0.26	PARS2	0.24	ACOT11	0.21	C8B	0.19
Breast_SE_170	MROH7	0.57	DHCR24	0.46	LOC101929935	0.42	TTC22	0.41	PRKAA2	0.27	USP24	0.19	BSND	0.16	ACOT11	0.13	PARS2	0.12	FAM151A	0.09
Breast_SE_171	PRKAA2	0.37	DHCR24	0.37	C8A	0.3	MROH7	0.29	PARS2	0.28	OMA1	0.22	USP24	0.16	C8B	0.11	LOC100507634	0.1	LOC101929935	0.07
Breast_SE_173	TACSTD2	0.82	CYP2J2	0.48	NFIA-AS2	0.44	HOOK1	0.36	LOC101929935	0.29	C1orf87	0.26	LINC01135	0.23	MYSM1	0.16	LOC101926964	0.13	PRKAA2	0.08
Breast_SE_174	MYSM1	0.55	OMA1	0.42	JUN	0.33	NFIA-AS2	0.27	LOC101926964	0.22	LOC101929935	0.2	C8A	0.18	C8B	0.18	LOC101926944	0.12	LINC01135	0.12
Breast_SE_176	HSD52	0.45	LINC01358	0.42	JUN	0.36	C8B	0.2	LOC101926964	0.2	DAB1-AS1	0.06	C1orf87	0.03	FGGY	0.03	MIR4711	0	OMA1	0
Breast_SE_178	NFIA	0.84	HOOK1	0.56	CYP2J2	0.55	MGC34796	0.45	NFIA-AS1	0.37	NFIA-AS2	0.24	C1orf87	0.23	LOC101926964	0.1	FGGY	0.06	KANK4	0
Breast_SE_180	NFIA-AS2	0.4	ALG6	0.36	NFIA	0.28	NFIA-AS1	0.23	LINC00466	0.21	KANK4	0.2	USP1	0.19	ANGPTL3	0.15	TM2D1	0.11	MGC34796	0.05
Breast_SE_181	KANK4	0.73	DOCK7	0.38	DLEU2L	0.32	ANGPTL3	0.29	USP1	0.28	TM2D1	0.18	ATG4C	0.13	ALG6	0.11	NFIA-AS1	0.07	MIR3116-2	0
Breast_SE_182	USP1	0.7	DOCK7	0.62	ATG4C	0.51	KANK4	0.5	ANGPTL3	0.45	ALG6	0.45	ITGB3BP	0.34	EFCAB7	0.34	PGM1	0.3	L1TD1	0.21
Breast_SE_183	PGM1	0.66	ROR1	0.63	DOCK7	0.49	ATG4C	0.31	ANGPTL3	0.31	USP1	0.23	ALG6	0.22	MIR6068	0.18	JAK1	0.1	CACHD1	0.07
Breast_SE_186	LINC01359	0.36	AK4	0.3	PDE4B	0.29	JAK1	0.26	MIR3671	0.16	ROR1-AS1	0.04	CACHD1	0.04	MIR101-1	0	MIR4794	0	LOC101927139	0
Breast_SE_187	LEPR	0.53	LEPROT	0.43	DNAJC6	0.36	SGIP1	0.35	PDE4B	0.2	JAK1	0.18	MIR3671	0.17	WDR78	0.16	LINC01359	0.13	TCTEX1D1	0.02
Breast_SE_188	PDE4B	0.71	WDR78	0.38	MIR3671	0.38	LINC01359	0.16	TCTEX1D1	0.07	AK4	0	LOC101927139	0	MIR3117	0	MIR101-1	0	IL12RB2	0
Breast_SE_191	GADD45A	0.68	WLS	0.57	GNG12	0.56	SERBP1	0.56	MIER1	0.51	SGIP1	0.46	GNG12-AS1	0.39	DEPDC1	0.37	WDR78	0.33	SLC35D1	0.3
Breast_SE_192	GNG12-AS1	0.66	WLS	0.54	C1orf141	0.45	SLC35D1	0.44	INSL5	0.33	IL23R	0.33	DEPDC1	0.28	DIRAS3	0.25	GNG12	0.23	GADD45A	0.18
Breast_SE_194	NEGR1	0.83	LRRIQ3	0.38	LRRC40	0.38	ZRANB2-AS1	0.37	ANKRD13C	0.32	ZRANB2	0.25	FPGT-TNNI3K	0.21	ERICH3	0.2	ZRANB2-AS2	0.18	NEGR1-IT1	0.16
Breast_SE_196	ST6GALNAC5	0.94	ZZZ3	0.68	USP33	0.6	SNORD45A	0.59	MIR7156	0.53	SNORD45C	0.47	AK5	0.44	RABGGTB	0.44	SNORD45B	0.42	PIGK	0.33
Breast_SE_197	ST6GALNAC5	0.79	MIR7156	0.57	ZZZ3	0.53	SNORD45A	0.52	SNORD45C	0.5	SNORD45B	0.44	RABGGTB	0.37	MGC27382	0.37	AK5	0.35	USP33	0.34
Breast_SE_198	AK5	0.66	PIGK	0.65	DNAJB4	0.59	PTGFR	0.58	NEXN-AS1	0.55	MGC27382	0.49	NEXN	0.47	ST6GALNAC3	0.45	ST6GALNAC5	0.34	ZZZ3	0.27
Breast_SE_201	ST6GALNAC5	0.35	ST6GALNAC3	0.34	MGC27382	0.32	USP33	0.29	PIGK	0.27	MSH4	0.22	AK5	0.22	SNORD45B	0.21	ZZZ3	0.2	PTGFR	0.18
Breast_SE_204	IFI44L	0.28	LINC01461	0.26	LINC01361	0.25	LOC101927434	0.25	SPATA1	0.24	TTLL7	0.24	IFI44	0.24	PRKACB	0.16	CTBS	0.12	LPAR3	0.1
Breast_SE_205	SYDE2	0.9	C1orf52	0.37	DNASE2B	0.36	SSX2IP	0.35	DDAH1	0.31	MCOLN2	0.31	MCOLN3	0.28	COL24A1	0.06	MIR4423	0	LINC01461	0
Breast_SE_206	CTBS	0.73	CYR61	0.52	C1orf52	0.48	SPATA1	0.47	COL24A1	0.43	GNG5	0.42	DDAH1	0.39	ZNHIT6	0.37	LINC01461	0.32	RPF1	0.31
Breast_SE_207	DDAH1	0.79	SYDE2	0.65	C1orf52	0.55	SSX2IP	0.49	COL24A1	0.3	ZNHIT6	0.24	LINC01461	0.23	ODF2L	0.19	GNG5	0.19	MCOLN3	0.16
Breast_SE_208	CYR61	0.69	CTBS	0.66	DDAH1	0.64	ZNHIT6	0.61	COL24A1	0.55	C1orf52	0.53	LINC01461	0.43	ODF2L	0.35	CLCA1	0.31	LOC646626	0.28
Breast_SE_209	C1orf52	0.69	SH3GLB1	0.62	CYR61	0.55	BCL10	0.52	ZNHIT6	0.5	HS2ST1	0.44	LINC01140	0.33	COL24A1	0.33	ODF2L	0.32	LMO4	0.28
Breast_SE_210	LMO4	0.77	GBP1	0.54	ZNHIT6	0.51	PKN2	0.49	GBP3	0.35	SH3GLB1	0.33	LINC01140	0.3	COL24A1	0.3	CLCA1	0.3	LINC01364	0.3
Breast_SE_215	ZNF326	0.72	LRRC8D	0.5	LRRC8B	0.45	PKN2	0.31	ZNF644	0.31	FLJ27354	0.22	BARHL2	0.19	RBMXL1	0.17	GEMIN8P4	0.17	LOC729930	0.05
Breast_SE_216	PKN2	0.54	ZNF644	0.51	ZNF326	0.45	FLJ27354	0.41	RBMXL1	0.32	LRRC8D	0.31	GBP1	0.26	GBP3	0.26	GEMIN8P4	0.22	GBP4	0.19
Breast_SE_219	TGFBR3	0.63	C1orf146	0.49	EVI5	0.42	HFM1	0.36	MTF2	0.33	SNORD21	0.32	CDC7	0.22	EPHX4	0.21	SNORA66	0.2	FAM69A	0.14
Breast_SE_220	TGFBR3	0.76	HFM1	0.46	EVI5	0.43	RPL5	0.33	RPAP2	0.31	SNORD21	0.28	MTF2	0.24	C1orf146	0.23	CDC7	0.22	BARHL2	0.14
Breast_SE_222	LOC100129046	0.68	BCAR3	0.66	CCDC18	0.47	EVI5	0.42	ABCD3	0.42	DR1	0.38	ARHGAP29	0.37	FAM69A	0.37	GCLM	0.37	TMED5	0.3
Breast_SE_223	SLC44A3	0.57	ABCA4	0.57	ABCD3	0.47	ARHGAP29	0.43	CCDC18	0.4	GCLM	0.37	FNBP1L	0.37	MTF2	0.25	MIR760	0.22	MIR378G	0.22
Breast_SE_224	ARHGAP29	0.77	FNBP1L	0.54	CNN3	0.53	LOC729970	0.51	ABCD3	0.48	ABCA4	0.41	SLC44A3	0.39	TMEM56-RWDD3	0.36	LOC100129046	0.35	DNTTIP2	0.31
Breast_SE_225	F3	0.75	LOC100129046	0.57	BCAR3	0.53	GCLM	0.38	ABCA4	0.36	ARHGAP29	0.34	ABCD3	0.26	LOC101928118	0.26	CNN3	0.22	ALG14	0.11
Breast_SE_226	CNN3	0.83	LOC729970	0.67	ARHGAP29	0.58	RWDD3	0.52	TMEM56-RWDD3	0.51	SLC44A3	0.48	ABCD3	0.42	LOC100129046	0.39	TMEM56	0.36	ABCA4	0.34
Breast_SE_229	DPYD	0.75	MIR2682	0.75	DPYD-AS1	0.75	MIR137HG	0.7	MIR137	0.69	DPYD-AS2	0.58	SNX7	0.43	LRRC39	0.35	TRMT13	0.31	DBT	0
Breast_SE_231	DPYD-AS1	0.72	DPYD	0.71	SNX7	0.51	MIR137	0.46	MIR137HG	0.45	MIR2682	0.44	MIR548N	0.37	RTCA	0.34	LRRC39	0.32	TRMT13	0.31
Breast_SE_232	FRRS1	0.47	PALMD	0.46	EXTL2	0.38	GPR88	0.36	RTCA	0.32	AGL	0.32	DBT	0.27	SNX7	0.27	SLC30A7	0.25	SASS6	0.25
Breast_SE_235	PRMT6	0.58	GPSM2	0.52	PRPF38B	0.52	CLCC1	0.49	SLC25A24	0.45	STXBP3	0.44	FAM102B	0.41	NBPF4	0.4	NBPF6	0.39	VAV3	0.36
Breast_SE_236	PRMT6	0.58	GPSM2	0.52	PRPF38B	0.52	CLCC1	0.49	SLC25A24	0.45	STXBP3	0.44	FAM102B	0.41	NBPF4	0.4	NBPF6	0.39	VAV3	0.36
Breast_SE_237	CLCC1	0.59	WDR47	0.51	GPSM2	0.49	STXBP3	0.44	VAV3	0.36	TMEM167B	0.35	TAF13	0.34	FNDC7	0.34	NTNG1	0.29	AKNAD1	0.22
Breast_SE_238	VAV3	0.63	GPSM2	0.5	CLCC1	0.4	FAM102B	0.36	PRPF38B	0.36	PRMT6	0.34	STXBP3	0.31	SPATA42	0.28	NBPF4	0.25	NBPF6	0.22
Breast_SE_239	SLC25A24	0.62	FAM102B	0.49	CLCC1	0.48	PRPF38B	0.47	NBPF4	0.4	NBPF6	0.4	GPSM2	0.36	C1orf194	0.36	WDR47	0.35	VAV3-AS1	0.34
Breast_SE_240	FAM102B	0.69	NBPF4	0.65	NBPF6	0.64	C1orf194	0.63	KIAA1324	0.63	VAV3-AS1	0.53	HENMT1	0.38	PRPF38B	0.37	SLC25A24	0.29	STXBP3	0.26
Breast_SE_241	STXBP3	0.78	HENMT1	0.66	SLC25A24	0.66	TAF13	0.62	FAM102B	0.56	TMEM167B	0.56	PRPF38B	0.53	GPSM2	0.52	SARS	0.5	WDR47	0.5
Breast_SE_244	CELSR2	0.76	SORT1	0.71	GPSM2	0.71	KIAA1324	0.68	PRPF38B	0.65	CLCC1	0.61	C1orf194	0.56	STXBP3	0.52	HENMT1	0.52	PSRC1	0.51
Breast_SE_245	GNAT2	0.6	PSRC1	0.56	PSMA5	0.55	GNAI3	0.54	AMPD2	0.52	MIR197	0.46	GSTM5	0.45	GSTM2	0.44	GSTM1	0.35	GSTM4	0.34
Breast_SE_246	AHCYL1	0.66	ALX3	0.59	GSTM4	0.44	GSTM2	0.4	GSTM5	0.39	GNAT2	0.31	GSTM1	0.3	PSMA5	0.28	CSF1	0.25	EPS8L3	0.23
Breast_SE_247	KCNC4-AS1	0.76	KCNC4	0.67	RBM15	0.59	SLC6A17	0.5	UBL4B	0.42	PROK1	0.41	ALX3	0.3	KCNA2	0.28	EPS8L3	0.28	AHCYL1	0.22
Breast_SE_248	AHCYL1	0.5	LAMTOR5-AS1	0.37	ALX3	0.34	LAMTOR5	0.32	SLC16A4	0.27	EPS8L3	0.18	STRIP1	0.16	GSTM3	0.08	UBL4B	0	RBM15	0
Breast_SE_249	DENND2D	0.63	OVGP1	0.52	DRAM2	0.4	CHI3L2	0.34	CEPT1	0.28	CD53	0.28	PGCP1	0.28	CHIAP2	0.24	PIFO	0.21	LINC01160	0.15
Breast_SE_250	FAM212B	0.87	KCND3	0.58	DENND2D	0.42	PGCP1	0.41	RAP1A	0.4	OVGP1	0.36	DDX20	0.32	LOC101928718	0.31	FAM212B-AS1	0.28	CEPT1	0.23
Breast_SE_251	ST7L	0.57	MOV10	0.56	CTTNBP2NL	0.52	AKR7A2P1	0.41	RHOC	0.38	SLC16A1-AS1	0.28	DDX20	0.23	LOC100996251	0.2	CAPZA1	0.2	WNT2B	0.14
Breast_SE_252	ST7L	0.5	MOV10	0.33	RHOC	0.32	AKR7A2P1	0.21	SLC16A1-AS1	0.2	LRIG2	0.18	KCND3-IT1	0.18	KCND3	0.17	CAPZA1	0.11	WNT2B	0.08
Breast_SE_253	RHOC	0.48	ST7L	0.43	DDX20	0.3	MOV10	0.28	PPM1J	0.26	MAGI3	0.25	AKR7A2P1	0.22	CAPZA1	0.18	LRIG2	0.15	WNT2B	0.15
Breast_SE_254	LINC01356	0.74	ST7L	0.46	CTTNBP2NL	0.44	LRIG2	0.42	AKR7A2P1	0.42	RHOC	0.36	SLC16A1-AS1	0.34	PHTF1	0.34	SLC16A1	0.32	MIR4256	0.32
Breast_SE_255	LOC643441	0.85	MAGI3	0.77	RSBN1	0.09	LOC100996251	0.04	LRIG2	0.04	BCL2L15	0	MOV10	0	ST7L	-0.1	CAPZA1	-0.1	AKR7A2P1	-0.2
Breast_SE_261	TRIM33	0.85	HIPK1	0.76	AMPD1	0.69	HIPK1-AS1	0.68	SIKE1	0.64	BCAS2	0.64	CSDE1	0.64	BCL2L15	0.63	DCLRE1B	0.61	RSBN1	0.55
Breast_SE_266	TSPAN2	0.77	OLFML3	0.6	SYT6	0.59	TSHB	0.55	CSDE1	0.29	NRAS	0.26	VANGL1	0.25	SIKE1	0.18	SYCP1	0.16	NGF	0.16
Breast_SE_267	NGF	0.82	TSPAN2	0.3	SYT6	0.09	VANGL1	0.03	TSHB	0	CASQ2	0	LOC101928977	0	ATP1A1-AS1	-0.1	ATP1A1	-0.1	SYCP1	-0.1
Breast_SE_269	CASQ2	0.51	TSHB	0.29	VANGL1	0.21	SYCP1	0.16	TSPAN2	0.14	IGSF3	0.14	AMPD1	0.05	MIR548AC	0.04	SIKE1	0.03	MIR320B1	0
Breast_SE_271	CD101	0.47	IGSF3	0.46	LOC101929099	0.4	PTGFRN	0.39	LOC101928977	0.39	MAB21L3	0.37	SLC22A15	0.26	ATP1A1	0.24	TTF2	0.21	ATP1A1-AS1	0.2
Breast_SE_272	LOC101929099	0.71	IGSF3	0.53	TRIM45	0.52	CD101	0.42	MIR548AC	0.39	TTF2	0.34	PTGFRN	0.25	ATP1A1	0.2	MAB21L3	0.18	CASQ2	0.17
Breast_SE_273	LOC101929099	0.59	TRIM45	0.56	TTF2	0.53	MIR548AC	0.46	ATP1A1	0.45	ATP1A1-AS1	0.4	IGSF3	0.4	CD101	0.35	CASQ2	0.2	CD58	0.14
Breast_SE_274	TRIM45	0.29	C1orf137	0.26	LOC101929099	0.23	VTCN1	0.22	CD58	0.19	CD101	0.15	TTF2	0.13	MIR942	0.12	CASQ2	0.11	MIR548AC	0.06
Breast_SE_277	VTCN1	0.81	TRIM45	0.77	LOC101929099	0.65	IGSF3	0.57	CD101	0.46	FAM46C	0.42	GDAP2	0.38	TTF2	0.34	MAN1A2	0.23	PTGFRN	0.21
Breast_SE_278	TRIM45	0.56	MAN1A2	0.54	TTF2	0.52	LOC101929099	0.48	GDAP2	0.46	VTCN1	0.46	MIR942	0.32	SPAG17	0.3	CD101	0.26	FAM46C	0.26
Breast_SE_279	FAM46C	0.86	LOC100996263	0.45	LOC101929099	0.25	VTCN1	0.21	CD101	0.12	TRIM45	0.09	GDAP2	0.09	IGSF3	0.01	MIR942	0	MIR320B1	0
Breast_SE_282	PHGDH	0.74	HSD3B2	0.44	HAO2	0.24	NOTCH2	0.22	HMGCS2	0.2	WARS2	0.16	SEC22B	0.13	PFN1P2	0.06	HSD3BP4	0.06	LOC101929147	0.03
Breast_SE_284	PDZK1	0.52	NBPF25P	0.29	PIAS3	0.18	MIR6736	0.16	RNF115	0.11	GPR89A	0.11	NUDT17	0.1	GNRHR2	0.08	CD160	0.07	ANKRD34A	0
Breast_SE_285	POLR3GL	0.58	MIR6736	0.53	NUDT17	0.53	PIAS3	0.48	ANKRD34A	0.45	NBPF25P	0.38	PEX11B	0.36	TXNIP	0.22	RNF115	0.19	RBM8A	0.18
Breast_SE_286	RNF115	0.53	PEX11B	0.52	POLR3GL	0.52	RBM8A	0.48	GNRHR2	0.45	POLR3C	0.4	NUDT17	0.36	RNVU1-6	0.34	HFE2	0.3	PIAS3	0.2
Breast_SE_292	HIST2H2AC	0.54	VPS45	0.47	OTUD7B	0.46	BOLA1	0.37	HIST2H2AB	0.35	HIST2H2BE	0.35	FCGR1A	0.31	HIST2H2BC	0.31	HIST2H2BF	0.31	HIST2H4B	0.3
Breast_SE_295	ANP32E	0.7	PRPF3	0.66	MTMR11	0.57	CIART	0.56	MRPS21	0.54	APH1A	0.45	RPRD2	0.44	MIR6878	0.43	BOLA1	0.39	CA14	0.39
Breast_SE_296	RPRD2	0.69	PRPF3	0.67	APH1A	0.65	MIR6878	0.62	ENSA	0.6	MRPS21	0.6	TARS2	0.58	CA14	0.58	VPS45	0.56	CIART	0.53
Breast_SE_297	MIR6878	0.72	TARS2	0.67	APH1A	0.62	ADAMTSL4-AS1	0.56	ENSA	0.55	MIR4257	0.54	PRPF3	0.53	CTSK	0.52	MRPS21	0.49	MCL1	0.48
Breast_SE_298	ANXA9	0.76	CERS2	0.62	BNIPL	0.61	C1orf56	0.53	GABPB2	0.51	CDC42SE1	0.46	ARNT	0.46	VPS72	0.46	SETDB1	0.41	SCNM1	0.41
Breast_SE_299	ARNT	0.76	C1orf56	0.75	SETDB1	0.72	GABPB2	0.71	BNIPL	0.69	LYSMD1	0.68	VPS72	0.66	CDC42SE1	0.66	ANXA9	0.6	TNFAIP8L2-SCNM1	0.6
Breast_SE_300	GABPB2	0.62	BNIPL	0.5	ANXA9	0.45	SELENBP1	0.45	TNFAIP8L2	0.42	TMOD4	0.4	LYSMD1	0.37	C1orf56	0.37	VPS72	0.36	PIP5K1A	0.36
Breast_SE_301	RFX5	0.67	LOC100507670	0.63	SELENBP1	0.63	POGZ	0.61	PI4KB	0.6	ZNF687	0.56	PSMD4	0.55	TNFAIP8L2-SCNM1	0.48	SCNM1	0.48	VPS72	0.48
Breast_SE_303	CGN	0.78	TDRKH	0.76	LOC100507670	0.69	SELENBP1	0.62	ZNF687	0.55	RORC	0.54	SNX27	0.53	TUFT1	0.5	POGZ	0.48	MIR554	0.46
Breast_SE_304	RORC	0.86	RIIAD1	0.69	SELENBP1	0.69	TDRKH	0.69	LOC100132111	0.64	CGN	0.59	SNX27	0.52	POGZ	0.49	CELF3	0.47	MRPL9	0.35
Breast_SE_305	LOC100132111	0.83	THEM5	0.72	CGN	0.7	C2CD4D	0.67	RORC	0.6	TDRKH	0.51	RIIAD1	0.45	CELF3	0.43	SNX27	0.38	MIR554	0.35
Breast_SE_306	S100A10	0.43	S100A11	0.42	LOC100132111	0.31	MRPL9	0.3	C2CD4D	0.29	FLG	0.26	NBPF18P	0.25	HRNR	0.23	THEM5	0.21	CELF3	0.21
Breast_SE_309	S100A9	0.73	S100A8	0.67	S100A7	0.61	PGLYRP4	0.54	LOR	0.48	S100A7L2	0.46	S100A7A	0.44	S100A12	0.39	PGLYRP3	0.37	SPRR2G	0.22
Breast_SE_310	S100A1	0.59	CHTOP	0.46	S100A13	0.44	S100A4	0.38	S100A5	0.37	S100A14	0.29	LOC101928034	0.28	SNAPIN	0.22	PGLYRP4	0.16	S100A7L2	0.15
Breast_SE_311	GATAD2B	0.57	INTS3	0.52	CHTOP	0.49	S100A1	0.47	DENND4B	0.45	SLC27A3	0.39	SNAPIN	0.36	S100A14	0.34	ILF2	0.29	MIR8083	0.28
Breast_SE_312	JTB	0.55	INTS3	0.54	CREB3L4	0.51	S100A1	0.47	DENND4B	0.42	CRTC2	0.4	RAB13	0.39	CHTOP	0.39	SNAPIN	0.36	NUP210L	0.31
Breast_SE_313	CREB3L4	0.43	JTB	0.37	UBAP2L	0.34	RAB13	0.34	DENND4B	0.33	HAX1	0.22	C1orf43	0.19	CRTC2	0.19	ATP8B2	0.07	LOC101928101	0.03
Breast_SE_314	IL6R	0.65	C1orf43	0.58	HAX1	0.52	LOC101928101	0.47	ADAR	0.45	TPM3	0.44	CHRNB2	0.4	UBE2Q1	0.38	UBE2Q1-AS1	0.33	SHE	0.27
Breast_SE_315	ADAR	0.56	PMVK	0.54	UBE2Q1-AS1	0.54	UBE2Q1	0.54	CKS1B	0.48	HAX1	0.42	PYGO2	0.39	FLAD1	0.36	KCNN3	0.28	LOC101928101	0.25
Breast_SE_316	FLAD1	0.79	DCST1	0.77	PYGO2	0.77	DCST2	0.75	PMVK	0.75	EFNA3	0.73	EFNA1	0.72	EFNA4	0.67	SLC50A1	0.62	LENEP	0.56
Breast_SE_317	MUC1	0.65	DCST1	0.58	SLC50A1	0.5	THBS3	0.48	GBA	0.48	MTX1	0.45	EFNA3	0.44	DPM3	0.43	PKLR	0.42	TRIM46	0.38
Breast_SE_318	YY1AP1	0.8	GON4L	0.58	DAP3	0.55	ASH1L	0.48	POU5F1P4	0.48	ASH1L-AS1	0.43	MSTO2P	0.37	PKLR	0.36	RIT1	0.32	MSTO1	0.31
Breast_SE_319	YY1AP1	0.8	GON4L	0.59	DAP3	0.55	POU5F1P4	0.48	ASH1L	0.48	ASH1L-AS1	0.43	MSTO2P	0.38	PKLR	0.36	RIT1	0.32	MSTO1	0.31
Breast_SE_320	ASH1L-AS1	0.59	YY1AP1	0.58	GON4L	0.53	RXFP4	0.46	MSTO2P	0.45	POU5F1P4	0.44	SCARNA4	0.43	SNORA80E	0.42	ASH1L	0.41	ARHGEF2	0.41
Breast_SE_321	YY1AP1	0.77	UBQLN4	0.7	GON4L	0.64	SCARNA4	0.63	ASH1L-AS1	0.51	POU5F1P4	0.5	ASH1L	0.48	MSTO2P	0.47	RXFP4	0.45	DAP3	0.45
Breast_SE_322	YY1AP1	0.73	UBQLN4	0.69	LAMTOR2	0.67	MSTO2P	0.67	SCARNA4	0.64	KIAA0907	0.63	MEX3A	0.54	RXFP4	0.51	SNORA80E	0.49	SSR2	0.42
Breast_SE_323	MEF2D	0.5	TSACC	0.5	PMF1-BGLAP	0.4	PMF1	0.4	IQGAP3	0.32	HAPLN2	0.3	C1orf61	0.3	PAQR6	0.28	BGLAP	0.21	GPATCH4	0.19
Breast_SE_324	RRNAD1	0.76	CRABP2	0.73	PRCC	0.47	HAPLN2	0.45	IQGAP3	0.45	ISG20L2	0.39	HDGF	0.38	NES	0.36	TTC24	0.32	LOC101928177	0.3
Breast_SE_325	PEAR1	0.76	NTRK1	0.36	SH2D2A	0.24	INSRR	0.18	GPATCH4	0.16	BCAN	0.04	LRRC71	0.03	ETV3L	0	NES	0	ISG20L2	-0.1
Breast_SE_326	CRABP2	0.7	ETV3	0.62	RRNAD1	0.53	CYCSP52	0.52	ARHGEF11	0.44	HAPLN2	0.43	FCRL5	0.3	PRCC	0.27	HDGF	0.24	ISG20L2	0.22
Breast_SE_327	CD1D	0.27	CD1C	0.25	CD1A	0.21	FCRL4	0.21	CD1B	0.13	OR10X1	0.12	FCRL5	0.09	CD1E	0.07	OR6P1	0.07	OR10K1	0
Breast_SE_329	DUSP23	0.67	PIGM	0.62	CFAP45	0.59	IGSF9	0.58	CASQ1	0.57	ATP1A2	0.54	VSIG8	0.53	TAGLN2	0.52	KCNJ10	0.49	ATP1A4	0.47
Breast_SE_330	CFAP45	0.56	CASQ1	0.55	PEX19	0.54	DCAF8	0.53	SLAMF8	0.52	IGSF9	0.48	VSIG8	0.47	PIGM	0.46	ATP1A4	0.46	ATP1A2	0.45
Breast_SE_332	KCNJ9	0.46	COPA	0.44	DCAF8	0.41	NCSTN	0.27	NHLH1	0.25	SLAMF6	0.23	PEX19	0.21	KCNJ10	0.21	PIGM	0.21	VANGL2	0.18
Breast_SE_333	VANGL2	0.86	KCNJ9	0.45	IGSF8	0.44	NHLH1	0.32	PEX19	0.3	CD48	0.24	COPA	0.23	SLAMF6	0.18	DCAF8	0.15	CD84	0.06
Breast_SE_334	USP21	0.69	TSTD1	0.63	UFC1	0.62	ARHGAP30	0.61	KLHDC9	0.57	PPOX	0.56	USF1	0.55	DEDD	0.52	F11R	0.49	B4GALT3	0.49
Breast_SE_335	PPOX	0.71	UFC1	0.7	USF1	0.7	DEDD	0.67	ARHGAP30	0.67	NDUFS2	0.65	KLHDC9	0.65	NIT1	0.62	TSTD1	0.59	B4GALT3	0.57
Breast_SE_336	USP21	0.46	UFC1	0.42	PPOX	0.38	ADAMTS4	0.33	APOA2	0.32	FCER1G	0.31	B4GALT3	0.28	NIT1	0.28	NR1I3	0.24	DEDD	0.23
Breast_SE_338	FCRLB	0.52	FCGR2A	0.33	FCRLA	0.32	MPZ	0.25	RPL31P11	0.2	HSPA7	0.15	MIR5187	0.12	FCGR2C	0.12	FCGR3B	0.1	HSPA6	0.09
Breast_SE_339	OLFML2B	0.75	FCGR2A	0.38	SDHC	0.3	RPL31P11	0.26	HSPA7	0.19	DUSP12	0.15	ATF6	0.14	FCGR2C	0.12	UHMK1	0.02	SH2D1B	0
Breast_SE_341	UAP1	0.74	DDR2	0.55	NUF2	0.36	OLFML2B	0.25	UHMK1	0.23	RGS5	0.09	RPL31P11	0.06	LOC101928404	0.06	DUSP12	0.04	ATF6	0.04
Breast_SE_342	DDR2	0.56	OLFML2B	0.52	RGS4	0.51	UAP1	0.51	LOC101928404	0.5	RGS5	0.49	SH2D1B	0.35	NUF2	0.32	FCRLA	0.32	RPL31P11	0.29
Breast_SE_343	PBX1	0.79	LMX1A	0.3	LRRC52	0.14	LOC100147773	0.11	RXRG	0.06	FAM78B	0.05	MIR921	0	LOC400794	0	RGS5	0	LOC100505795	0
Breast_SE_345	UCK2	0.53	MIR3658	0.37	ALDH9A1	0.26	FAM78B	0.23	ILDR2	0.18	RXRG	0.18	LRRC52	0.18	POGK	0.07	MGST3	0.06	LOC400794	0
Breast_SE_347	TADA1	0.69	POU2F1	0.58	RCSD1	0.47	MPC2	0.43	TIPRL	0.42	DCAF6	0.41	ADCY10	0.36	SFT2D2	0.33	CD247	0.31	MPZL1	0.25
Breast_SE_349	RCSD1	0.59	CREG1	0.51	MPZL1	0.37	ILDR2	0.36	ADCY10	0.27	MAEL	0.27	MIR1255B2	0.24	DCAF6	0.19	SFT2D2	0.14	TIPRL	0.12
Breast_SE_350	TBX19	0.45	MPC2	0.44	CREG1	0.42	SFT2D2	0.41	DCAF6	0.41	ANKRD36BP1	0.41	RCSD1	0.4	ADCY10	0.4	MPZL1	0.39	POU2F1	0.32
Breast_SE_351	MPC2	0.7	DCAF6	0.57	SFT2D2	0.41	ADCY10	0.4	TBX19	0.38	TIPRL	0.37	POU2F1	0.35	RCSD1	0.26	CREG1	0.13	CD247	0.13
Breast_SE_352	TBX19	0.8	SFT2D2	0.71	ANKRD36BP1	0.66	GPR161	0.47	LINC00626	0.3	TIPRL	0.28	RCSD1	0.26	DPT	0.24	MPC2	0.16	MPZL1	0.14
Breast_SE_353	ATP1B1	0.74	NME7	0.68	C1orf112	0.38	SLC19A2	0.36	CCDC181	0.25	METTL18	0.24	BLZF1	0.24	LOC100505918	0.19	MIR557	0.18	LOC101928596	0.15
Breast_SE_356	METTL11B	0.91	LINC01142	0.89	PRRX1	0.74	FMO3	0.58	LOC101928650	0.57	MROH9	0.5	F5	0.47	SELL	0.46	KIFAP3	0.29	SELP	0.18
Breast_SE_358	PRRX1	0.87	FMO3	0.64	LOC101928650	0.55	METTL11B	0.53	LINC01142	0.51	MROH9	0.5	FMO4	0.39	KIFAP3	0.35	GORAB	0.24	FMO1	0.17
Breast_SE_359	LOC101928650	0.78	FMO2	0.64	FMO6P	0.53	LINC01142	0.46	FMO4	0.42	FMO1	0.39	PRRX1	0.35	FMO3	0.19	GORAB	0.17	MROH9	0.15
Breast_SE_360	FMO2	0.57	FMO4	0.41	MYOC	0.41	FMO6P	0.35	LOC101928650	0.35	FMO1	0.27	LINC01142	0.25	DNM3	0.2	MROH9	0.1	PRRX1	0.07
Breast_SE_361	MYOC	0.35	PRRC2C	0.34	DNM3	0.34	METTL13	0.22	FMO4	0.19	VAMP4	0.18	PRRX1	0.17	MIR3120	0.16	MIR214	0.15	DNM3OS	0.13
Breast_SE_363	DNM3	0.4	PIGC	0.34	DNM3OS	0.27	MIR199A2	0.27	MIR3120	0.23	MIR214	0.21	MYOC	0.1	FMO1	0.09	METTL13	0.05	FMO4	0.04
Breast_SE_364	PIGC	0.57	C1orf105	0.36	SUCO	0.31	SLC9C2	0.23	VAMP4	0.17	ANKRD45	0.12	METTL13	0.11	LOC100506023	0.1	MYOC	0.08	PRRC2C	0.07
Breast_SE_365	TNFSF4	0.36	PRDX6	0.29	LOC100506023	0.25	LOC101928673	0.24	FASLG	0.2	KLHL20	0.15	GAS5-AS1	0.14	GAS5	0.13	MIR199A2	0.12	DARS2	0.1
Breast_SE_367	SERPINC1	0.42	RABGAP1L	0.22	TNN	0.22	RC3H1	0.19	ZBTB37	0.17	MRPS14	0.14	LOC102724601	0.12	LOC101928696	0.12	SCARNA3	0.11	TNR	0.1
Breast_SE_368	KIAA0040	0.81	LOC102724601	0.56	TNR	0.47	SERPINC1	0.25	ZBTB37	0.22	SNORD77	0.17	RFWD2	0.15	GPR52	0.12	MRPS14	0.1	SCARNA3	0.06
Breast_SE_373	FAM20B	0.48	AXDND1	0.35	RALGPS2	0.31	ANGPTL1	0.23	CEP350	0.14	TDRD5	0.13	TOR3A	0.08	LOC730102	0.06	C1orf220	0.05	FAM163A	0.04
Breast_SE_374	ANGPTL1	0.4	C1orf220	0.31	FAM20B	0.17	FAM163A	0.16	CEP350	0.13	ABL2	0.11	AXDND1	0.06	RALGPS2	0.06	NPHS2	0.06	QSOX1	0.04
Breast_SE_376	FAM20B	0.5	CEP350	0.46	ACBD6	0.36	TDRD5	0.34	AXDND1	0.21	TOR1AIP2	0.2	TOR3A	0.19	ANGPTL1	0.15	FAM163A	0.12	LHX4	0.08
Breast_SE_377	QSOX1	0.78	FLJ23867	0.54	IER5	0.43	ACBD6	0.4	XPR1	0.29	TOR1AIP2	0.17	MR1	0.12	SOAT1	0.11	LHX4	0.08	TOR1AIP1	0.05
Breast_SE_379	LHX4-AS1	0.49	XPR1	0.4	LHX4	0.35	TDRD5	0.27	CACNA1E	0.19	TOR1AIP2	0.19	NPHS2	0.13	OVAAL	0.13	TOR1AIP1	0.09	FLJ23867	0.05
Breast_SE_381	CEP350	0.52	STX6	0.49	ACBD6	0.49	LHX4	0.28	XPR1	0.22	LINC01344	0.2	GLUL	0.19	IER5	0.19	FLJ23867	0.16	MR1	0.12
Breast_SE_382	IER5	0.43	ACBD6	0.33	MR1	0.25	LHX4	0.23	TEDDM1	0.19	STX6	0.18	XPR1	0.14	CEP350	0.14	OVAAL	0.1	FLJ23867	0.08
Breast_SE_384	GLUL	0.51	LINC01344	0.46	TEDDM1	0.46	ZNF648	0.44	LINC00272	0.36	NPL	0.33	RNASEL	0.29	RGS8	0.24	RGSL1	0.17	RGS16	0.16
Breast_SE_385	LINC01344	0.6	TEDDM1	0.57	ZNF648	0.53	RNASEL	0.48	LINC00272	0.43	RGS8	0.36	NMNAT2	0.2	MR1	0.16	GLUL	0.11	LAMC2	0.02
Breast_SE_386	GLUL	0.88	RGS16	0.42	DHX9	0.37	TEDDM1	0.3	RGS8	0.29	SMG7	0.29	LINC00272	0.27	ZNF648	0.27	LINC01344	0.26	RNASEL	0.17
Breast_SE_388	LAMC1	0.86	NMNAT2	0.64	LAMC2	0.39	ARPC5	0.35	RGL1	0.24	SMG7-AS1	0.16	NCF2	0.15	SHCBP1L	0.01	DHX9	-0.1	LINC01344	-0.1
Breast_SE_389	SMG7-AS1	0.39	C1orf21	0.32	ARPC5	0.31	NMNAT2	0.27	RGS16	0.15	RGS8	0.14	DHX9	0.09	LAMC1	0.07	SMG7	0.07	RGL1	0.07
Breast_SE_390	COLGALT2	0.41	RGL1	0.36	C1orf21	0.35	SMG7-AS1	0.35	ARPC5	0.28	EDEM3	0.23	NMNAT2	0.22	APOBEC4	0.21	LAMC1	0.13	RGS8	0.12
Breast_SE_392	C1orf21	0.79	APOBEC4	0.43	EDEM3	0.39	SMG7	0.32	FAM129A	0.24	LINC01350	0.21	SMG7-AS1	0.2	TRMT1L	0.08	SWT1	0.05	COLGALT2	0.02
Breast_SE_393	IVNS1ABP	0.52	TRMT1L	0.41	SWT1	0.38	GS1-279B7.1	0.28	PRG4	0.23	TSEN15	0.22	RNF2	0.2	EDEM3	0.18	HMCN1	0.14	TPR	0.09
Breast_SE_400	BRINP3	0.96	LINC01351	0.93	LOC102724919	0.46	GLRX2	0.28	CDC73	0.22	UCHL5	0.14	PDC	0.06	B3GALT2	0	RGS13	0	LINC01031	0
Breast_SE_401	RGS13	0.69	BRINP3	0.05	MIR4426	0.02	CDC73	0.01	LINC01351	0	MIR1278	0	B3GALT2	0	GLRX2	0	RGS21	0	RGS1	0
Breast_SE_402	RGS1	0.5	RGS2	0.32	TROVE2	0.17	CFH	0.1	CFHR3	0.1	LINC01031	0.04	GLRX2	0.03	B3GALT2	0.03	KCNT2	0.02	MIR4735	0
Breast_SE_404	DENND1B	0.73	ZBTB41	0.36	MIR181B1	0.33	CRB1	0.21	CFHR4	0.2	F13B	0.11	MIR181A1	0.11	C1orf53	0.09	ATP6V1G3	0.06	MIR181A1HG	0.05
Breast_SE_406	NEK7	0.5	LHX9	0.41	CFHR1	0.34	PTPRC	0.32	ASPM	0.3	ATP6V1G3	0.3	CFHR3	0.28	F13B	0.27	C1orf53	0.18	MIR181A1HG	0.16
Breast_SE_408	LINC00862	0.41	ZNF281	0.38	TMEM9	0.32	IGFN1	0.28	KIF14	0.04	DDX59	0.04	PHLDA3	-0.1	NR5A2	-0.1	KIF21B	-0.1	LOC101929224	-0.2
Breast_SE_412	C1orf106	0.86	LAD1	0.65	TNNI1	0.56	KIF21B	0.54	TNNT2	0.51	MROH3P	0.34	LOC101929224	0.31	GPR25	0.3	DDX59	0.3	CACNA1S	0.25
Breast_SE_413	KIF21B	0.88	TNNT2	0.51	C1orf106	0.43	TMEM9	0.39	DDX59	0.35	GPR25	0.31	ASCL5	0.27	LAD1	0.24	TNNI1	0.19	PHLDA3	0.17
Breast_SE_414	TMEM9	0.61	ASCL5	0.44	IGFN1	0.37	KIF21B	0.33	DDX59	0.23	RPS10P7	0.22	MROH3P	0.18	CACNA1S	0.16	C1orf106	0.03	CSRP1	0.01
Breast_SE_415	LAD1	0.72	PKP1	0.7	C1orf106	0.47	TNNI1	0.46	GPR25	0.39	KIF21B	0.34	PHLDA3	0.31	TNNT2	0.25	MIR1231	0.21	IPO9-AS1	0.18
Breast_SE_416	NAV1	0.59	SHISA4	0.57	MIR5191	0.46	MIR1231	0.42	CSRP1	0.27	LMOD1	0.25	IPO9	0.18	TMEM9	0.17	RPS10P7	0.13	MIR6739	0.12
Breast_SE_417	SHISA4	0.58	TIMM17A	0.41	RPS10P7	0.35	LMOD1	0.33	ARL8A	0.26	RNPEP	0.25	MIR6740	0.23	PTPRVP	0.17	IPO9	0.15	CSRP1	0.14
Breast_SE_418	ELF3	0.86	PPP1R12B	0.62	PTPRVP	0.45	GPR37L1	0.44	RPS10P7	0.41	ARL8A	0.4	MIR6739	0.33	RNPEP	0.27	IPO9	0.24	UBE2T	0.18
Breast_SE_419	CYB5R1	0.37	MIR6740	0.28	LGR6	0.19	SYT2	0.14	ADIPOR1	0.08	PTPRVP	0	UBE2T	-0.1	PCAT6	-0.1	LOC100506747	-0.2	KLHL12	-0.2
Breast_SE_420	KDM5B	0.82	RABIF	0.76	LOC148709	0.75	KLHL12	0.61	TMEM183A	0.61	MGAT4EP	0.53	ADIPOR1	0.53	PCAT6	0.46	PPP1R12B	0.42	UBE2T	0.37
Breast_SE_421	LOC100506747	0.69	LOC148709	0.52	TMEM183A	0.45	ADORA1	0.43	KLHL12	0.42	RABIF	0.37	ADIPOR1	0.35	KDM5B	0.3	LINC01353	0.28	MGAT4EP	0.25
Breast_SE_422	ADORA1	0.76	LOC100506747	0.54	TMEM183A	0.46	MYBPH	0.46	CHI3L1	0.45	MYOG	0.33	PRELP	0.24	KLHL12	0.21	ADIPOR1	0.2	PCAT6	0.14
Breast_SE_423	BTG2	0.88	FMOD	0.53	LINC01136	0.5	LOC148709	0.46	LINC01353	0.43	TMEM183A	0.43	CHIT1	0.35	KLHL12	0.3	ADORA1	0.3	LOC100506747	0.25
Breast_SE_424	LINC01136	0.73	LINC01353	0.7	FMOD	0.67	PRELP	0.66	BTG2	0.44	TMEM183A	0.2	PPFIA4	0.2	ADORA1	0.19	CHIT1	0.16	ZC3H11A	0
Breast_SE_425	ATP2B4	0.81	LINC00260	0.55	SNORA77	0.54	OPTC	0.38	PPFIA4	0.38	CHI3L1	0.17	MYOG	0.07	PRELP	0.02	CHIT1	0	MYBPH	0
Breast_SE_426	SOX13	0.42	SNORA77	0.37	LINC00260	0.37	LINC00628	0.33	FMOD	0.33	PIK3C2B	0.32	KISS1	0.25	REN	0.25	OPTC	0.22	ZC3H11A	0.19
Breast_SE_427	SOX13	0.77	PIK3C2B	0.71	PLEKHA6	0.56	LINC00628	0.56	GOLT1A	0.55	MDM4	0.53	REN	0.5	SNRPE	0.36	ETNK2	0.35	PPP1R15B	0.35
Breast_SE_428	NUAK2	0.32	TMCC2	0.28	KLHDC8A	0.25	NUCKS1	0.16	LOC284578	0.15	SLC45A3	0.11	LEMD1	0.09	CDK18	0.08	TMEM81	0.07	LEMD1-AS1	0.06
Breast_SE_429	BLACAT1	0.64	CDK18	0.57	LEMD1	0.5	LEMD1-AS1	0.38	MIR135B	0.37	LOC284577	0.34	KLHDC8A	0.3	NUCKS1	0.26	SLC45A3	0.18	CNTN2	0.13
Breast_SE_430	LOC284578	0.44	CDK18	0.4	ELK4	0.38	NUCKS1	0.37	KLHDC8A	0.3	SLC26A9	0.27	LOC284581	0.24	SLC45A3	0.13	TMCC2	0.08	LEMD1-AS1	0.06
Breast_SE_431	PM20D1	0.68	RAB29	0.6	NUCKS1	0.6	LOC284581	0.45	SLC45A3	0.32	ELK4	0.29	LOC284578	0.12	CDK18	0.08	SLC26A9	0.07	SLC41A1	0.07
Breast_SE_432	LOC103021296	0.53	CDK18	0.42	RAB7B	0.4	SLC26A9	0.36	MIR135B	0.32	C1orf186	0.32	AVPR1B	0.31	CTSE	0.3	LOC284577	0.25	LOC284578	0.21
Breast_SE_433	RASSF5	0.65	MAPKAPK2	0.52	IL20	0.42	IKBKE	0.42	SLC26A9	0.34	IL19	0.29	PIGR	0.29	EIF2D	0.23	LOC103021296	0.17	IL24	0.14
Breast_SE_434	IL10	0.38	PIGR	0.32	MAPKAPK2	0.29	C4BPA	0.29	FCAMR	0.16	IL19	0.08	SRGAP2	0.04	PFKFB2	0.04	IL20	0.03	DYRK3	0.02
Breast_SE_436	EIF2D	0.33	IL19	0.28	IL10	0.27	PIGR	0.26	C1orf116	0.22	CR2	0.2	C4BPB	0.19	C4BPA	0.19	RASSF5	0.16	IL24	0.09
Breast_SE_437	C1orf116	0.52	PFKFB2	0.48	YOD1	0.39	C4BPB	0.31	CR2	0.29	RASSF5	0.28	PIGR	0.22	C4BPA	0.18	IL24	0.15	EIF2D	0.09
Breast_SE_438	MIR29C	0.44	CR2	0.43	LOC148696	0.37	CD55	0.29	C4BPB	0.29	PFKFB2	0.28	IL24	0.25	C4BPA	0.22	CR1	0.2	FCAMR	0.15
Breast_SE_439	MIR29C	0.38	CR2	0.35	LOC148696	0.35	IL20	0.32	CD46	0.32	PFKFB2	0.27	MIR29B2	0.26	CR1	0.24	PIGR	0.22	IL19	0.21
Breast_SE_440	MIR29C	0.67	LOC148696	0.43	MIR29B2	0.35	PIGR	0.32	C1orf116	0.29	C4BPA	0.29	C4BPB	0.28	CD46	0.24	IL20	0.23	IL19	0.19
Breast_SE_441	PLXNA2	0.78	C1orf116	0.42	MIR29C	0.41	MIR205HG	0.34	MIR205	0.33	CR1	0.31	CD46	0.3	CR2	0.23	LOC148696	0.21	MIR29B2	0.18
Breast_SE_442	IRF6	0.66	MIR205HG	0.63	MIR205	0.61	MIR4260	0.48	LAMB3	0.47	TRAF3IP3	0.45	SERTAD4	0.37	PLXNA2	0.34	LOC148696	0.28	HHAT	0.19
Breast_SE_444	MIR4260	0.59	LAMB3	0.58	LOC101930114	0.57	SERTAD4-AS1	0.54	HHAT	0.35	G0S2	0.35	HSD11B1	0.34	C1orf74	0.29	SYT14	0.27	TRAF3IP3	0.22
Breast_SE_445	LAMB3	0.53	MIR4260	0.52	SERTAD4-AS1	0.5	LOC101930114	0.47	SYT14	0.36	C1orf74	0.32	G0S2	0.3	HSD11B1	0.3	HHAT	0.3	TRAF3IP3	0.23
Breast_SE_446	SERTAD4	0.74	SERTAD4-AS1	0.64	RCOR3	0.54	HHAT	0.49	LOC101930114	0.42	TRAF5	0.38	SYT14	0.24	G0S2	0.22	CAMK1G	0.21	C1orf74	0.12
Breast_SE_447	RCOR3	0.63	PPP2R5A	0.54	LOC101929541	0.53	SERTAD4	0.42	HHAT	0.4	INTS7	0.31	NEK2	0.31	DTL	0.24	LINC00467	0.2	KCNH1	0.09
Breast_SE_448	RCOR3	0.63	PPP2R5A	0.54	LOC101929541	0.53	SERTAD4	0.42	HHAT	0.4	INTS7	0.32	NEK2	0.31	DTL	0.24	LINC00467	0.2	SERTAD4-AS1	0.09
Breast_SE_449	RCOR3	0.65	PPP2R5A	0.54	LOC101929541	0.53	SERTAD4	0.43	HHAT	0.4	INTS7	0.33	NEK2	0.33	DTL	0.25	LINC00467	0.2	KCNH1	0.1
Breast_SE_452	RCOR3	0.64	LOC101929541	0.49	LOC91548	0.42	TRAF5	0.24	SNORA16B	0.24	NEK2	0.23	PPP2R5A	0.21	SLC30A1	0.15	MIR3122	0.1	RD3	0.03
Breast_SE_453	LOC91548	0.62	LOC102723727	0.56	PPP2R5A	0.55	SNORA16B	0.48	NEK2	0.47	RD3	0.4	LPGAT1	0.33	LINC00467	0.22	INTS7	0.21	RCOR3	0.21
Breast_SE_455	PPP2R5A	0.75	LOC101929541	0.64	FLVCR1	0.52	SNORA16B	0.41	LOC91548	0.41	SPATA45	0.36	INTS7	0.34	LOC102723727	0.26	ATF3	0.25	DTL	0.19
Breast_SE_456	PPP2R5A	0.56	LOC101929541	0.43	ATF3	0.39	SPATA45	0.27	VASH2	0.2	FLVCR1	0.18	INTS7	0.15	RPS6KC1	0.15	SNORA16B	0.14	MIR3122	0.14
Breast_SE_457	ATF3	0.7	LOC101929541	0.57	ANGEL2	0.3	VASH2	0.3	TATDN3	0.27	RPS6KC1	0.26	BATF3	0.23	FAM71A	0.23	PPP2R5A	0.2	FLVCR1	0.11
Breast_SE_461	PTPN14	0.65	USH2A	0.42	PROX1-AS1	0.29	CENPF	0.28	PROX1	0.2	FAM71A	0.2	BATF3	0.17	SMYD2	0.05	FLVCR1-AS1	0.02	LOC102723833	0
Breast_SE_463	KCTD3	0.5	KCNK2	0.37	USH2A	0.33	FLVCR1-AS1	0.32	GPATCH2	0.28	SPATA17-AS1	0.16	SPATA17	0.14	LOC102723833	0	LINC00210	0	SMYD2	0
Breast_SE_465	IARS2	0.15	TGFB2	0.06	TGFB2-AS1	0.05	TGFB2-OT1	0.04	LINC00210	0	LOC102723833	0	LOC102723886	0	LYPLAL1-AS1	0	SPATA17	-0.1	USH2A	-0.1
Breast_SE_466	TGFB2-AS1	0.83	TGFB2	0.81	TGFB2-OT1	0.79	RAB3GAP2	0.29	IARS2	0.25	LYPLAL1-AS1	0.21	BPNT1	0.15	SLC30A10	0.14	MIR194-1	0.14	EPRS	0.05
Breast_SE_467	TGFB2-AS1	0.62	TGFB2	0.59	TGFB2-OT1	0.58	IARS2	0.43	RRP15	0.31	MIR664A	0.31	LYPLAL1-AS1	0.28	RAB3GAP2	0.27	LYPLAL1	0.21	BPNT1	0.2
Breast_SE_468	TGFB2	0.76	TGFB2-AS1	0.75	TGFB2-OT1	0.75	IARS2	0.36	RAB3GAP2	0.33	LYPLAL1-AS1	0.32	BPNT1	0.27	MIR664A	0.19	LYPLAL1	0.19	RRP15	0.17
Breast_SE_469	IARS2	0.66	TGFB2	0.43	TGFB2-AS1	0.43	TGFB2-OT1	0.41	RAB3GAP2	0.33	RRP15	0.31	EPRS	0.26	LYPLAL1-AS1	0.19	BPNT1	0.19	MIR664A	0.07
Breast_SE_470	MIR548F3	0.81	LYPLAL1-AS1	0.28	LYPLAL1	0.16	MIR194-1	0.02	MARK1	0	MIR215	0	C1orf115	0	LOC102723886	-0.1	RRP15	-0.1	SLC30A10	-0.1
Breast_SE_471	LOC102723886	0.7	MIR548F3	0.42	SLC30A10	0.12	MIR215	0.1	MARK1	0.09	LYPLAL1-AS1	0.04	BPNT1	0.04	MIR194-1	0.01	C1orf115	0.01	LYPLAL1	0
Breast_SE_472	LOC102723886	0.89	HLX-AS1	0.43	LINC01352	0.31	MARK1	0.28	HLX	0.26	SLC30A10	0.25	RAB3GAP2	0.23	EPRS	0.19	MIR215	0.17	BPNT1	0.07
Breast_SE_473	MIR548F3	0.6	LOC102723886	0.46	LYPLAL1-AS1	0.36	HLX-AS1	0.26	LINC01352	0.22	HLX	0.19	LYPLAL1	0.08	MARK1	0	TGFB2-OT1	0	SLC30A10	0
Breast_SE_474	LOC102723886	0.5	RAB3GAP2	0.34	IARS2	0.29	MIR194-1	0.27	BPNT1	0.19	HLX-AS1	0.18	MIR215	0.17	LINC01352	0.15	EPRS	0.1	C1orf115	0.08
Breast_SE_478	DUSP10	0.72	TAF1A-AS1	0.51	HHIPL2	0.47	HLX	0.42	AURKAPS1	0.42	HLX-AS1	0.41	BROX	0.37	TAF1A	0.35	MIR664A	0.31	DISP1	0.28
Breast_SE_479	DUSP10	0.5	TAF1A	0.36	AURKAPS1	0.3	TAF1A-AS1	0.2	BROX	0.16	C1orf140	0.13	DISP1	0.1	HLX-AS1	0.09	TLR5	0.05	AIDA	0.02
Breast_SE_480	DUSP10	0.65	TAF1A-AS1	0.58	TAF1A	0.56	AIDA	0.52	HHIPL2	0.52	AURKAPS1	0.5	BROX	0.44	HLX-AS1	0.27	HLX	0.22	CAPN8	0.2
Breast_SE_481	CAPN8	0.65	FAM177B	0.63	C1orf115	0.27	TLR5	0.11	MARK1	0.05	DISP1	-0.1	BROX	-0.1	HHIPL2	-0.1	SUSD4	-0.1	MIA3	-0.1
Breast_SE_483	TLR5	0.68	LOC100287497	0.58	CAPN8	0.5	SUSD4	0.35	NVL	0.3	TP53BP2	0.28	CCDC185	0.28	BROX	0.26	LOC101927143	0.24	FAM177B	0.2
Breast_SE_487	CAPN2	0.74	TP53BP2	0.48	MIR4742	0.47	LOC100287497	0.43	DISP1	0.38	BROX	0.36	WDR26	0.36	DEGS1	0.33	NVL	0.29	CNIH3	0.28
Breast_SE_488	LOC101927164	0.72	NVL	0.71	LOC101927143	0.63	ENAH	0.59	DNAH14	0.51	MIR320B2	0.51	WDR26	0.46	FBXO28	0.41	DEGS1	0.39	CAPN8	0.38
Breast_SE_489	DNAH14	0.61	LOC100287497	0.6	CAPN8	0.58	WDR26	0.51	MIR4742	0.45	ENAH	0.39	LOC101927164	0.39	NVL	0.38	MIR320B2	0.29	LOC101927143	0.29
Breast_SE_490	CAPN2	0.63	DEGS1	0.51	CNIH3	0.39	LOC101927143	0.29	LOC100287497	0.25	CNIH4	0.24	ENAH	0.21	CAPN8	0.19	LOC101927164	0.19	DNAH14	0.18
Breast_SE_491	CNIH3	0.61	CAPN2	0.25	EPHX1	0.09	CNIH4	0	TMEM63A	0	ENAH	0	LBR	0	LOC101927143	-0.1	LOC100287497	-0.1	FBXO28	-0.2
Breast_SE_492	LBR	0.74	PARP1	0.7	SDE2	0.61	MIR4742	0.47	ACBD3	0.46	MIR6741	0.43	LIN9	0.43	EPHX1	0.36	WDR26	0.35	H3F3A	0.31
Breast_SE_493	EPHX1	0.73	ENAH	0.7	MIR6741	0.48	ACBD3	0.42	SRP9	0.39	H3F3A	0.36	DNAH14	0.35	TMEM63A	0.32	PARP1	0.31	LIN9	0.3
Breast_SE_494	PARP1	0.67	ACBD3	0.6	H3F3A	0.56	LIN9	0.55	SRP9	0.52	SDE2	0.47	ENAH	0.41	EPHX1	0.38	ITPKB	0.25	ITPKB-IT1	0.24
Breast_SE_495	ITPKB	0.62	H3F3A	0.6	PARP1	0.57	ACBD3	0.5	LIN9	0.46	SDE2	0.44	ENAH	0.44	TMEM63A	0.41	MIR6741	0.38	EPHX1	0.35
Breast_SE_498	ITPKB	0.8	ZNF678	0.44	ITPKB-IT1	0.44	PARP1	0.4	H3F3AP4	0.32	ACBD3	0.3	LIN9	0.29	TMEM63A	0.26	MIR6741	0.26	EPHX1	0.26
Breast_SE_499	ZNF678	0.45	H3F3A	0.4	PARP1	0.24	LEFTY2	0.23	ACBD3	0.23	LIN9	0.23	H3F3AP4	0.21	PRSS38	0.19	ITPKB-IT1	0.18	ITPKB	0.18
Breast_SE_502	SNAP47	0.62	ZNF678	0.61	C1orf35	0.48	JMJD4	0.47	IBA57-AS1	0.42	OBSCN	0.42	IBA57	0.32	WNT3A	0.32	MIR6742	0.32	ARF1	0.32
Breast_SE_503	MIR5008	0.47	WNT9A	0.47	WNT3A	0.35	PRSS38	0.25	ZNF678	0.24	OBSCN	0.19	TRIM11	0.16	ZNF847P	0.09	MIR6742	0.08	TRIM17	0.08
Breast_SE_504	C1orf35	0.64	MRPL55	0.57	TRIM11	0.55	OBSCN	0.48	MIR3620	0.46	GUK1	0.43	IBA57	0.43	ARF1	0.42	GJC2	0.41	MIR6742	0.39
Breast_SE_505	OBSCN	0.44	HIST3H2A	0.42	ARF1	0.42	WNT3A	0.42	MRPL55	0.41	MIR3620	0.37	GUK1	0.36	HIST3H2BB	0.35	TRIM17	0.33	C1orf35	0.33
Breast_SE_506	BTNL10	0.68	OBSCN	0.64	IBA57	0.59	C1orf35	0.55	TRIM11	0.51	RNF187	0.48	MIR3620	0.48	RNA5S1	0.48	HIST3H2BB	0.43	HIST3H3	0.4
Breast_SE_510	RAB4A	0.62	SPHAR	0.48	RHOU	0.38	RNA5S1	0.21	CCSAP	0.16	LOC101927478	0.15	RNA5S9	0	MIR7641-2	0	RNA5S10	0	RNA5S11	0
Breast_SE_512	GALNT2	0.65	FAM89A	0.39	ACTA1	0.37	URB2	0.34	TAF5L	0.28	ABCB10	0.26	MIR4454	0.25	TTC13	0.16	COG2	0.09	ARV1	0.08
Breast_SE_513	C1orf198	0.7	LOC101927604	0.68	CAPN9	0.5	C1orf131	0.48	TRIM67	0.44	AGT	0.36	COG2	0.35	TTC13	0.29	LOC149373	0.25	ARV1	0.22
Breast_SE_515	FAM89A	0.43	TSNAX-DISC1	0.43	TSNAX	0.42	MIR1182	0.39	EXOC8	0.38	EGLN1	0.36	TTC13	0.25	SPRTN	0.21	LOC149373	0.18	C1orf131	0.14
Breast_SE_516	TSNAX	0.4	FAM89A	0.39	TSNAX-DISC1	0.37	EXOC8	0.35	MIR1182	0.35	LINC00582	0.29	LOC149373	0.28	EGLN1	0.25	TTC13	0.2	C1orf131	0.18
Breast_SE_517	TSNAX	0.4	FAM89A	0.39	TSNAX-DISC1	0.37	MIR1182	0.35	EXOC8	0.34	LINC00582	0.29	LOC149373	0.28	EGLN1	0.25	TTC13	0.19	C1orf131	0.17
Breast_SE_518	TSNAX	0.4	FAM89A	0.39	TSNAX-DISC1	0.37	MIR1182	0.35	EXOC8	0.34	LINC00582	0.29	LOC149373	0.28	EGLN1	0.25	TTC13	0.19	C1orf131	0.17
Breast_SE_519	TSNAX	0.4	FAM89A	0.39	TSNAX-DISC1	0.37	MIR1182	0.35	EXOC8	0.34	LINC00582	0.29	LOC149373	0.28	EGLN1	0.25	TTC13	0.19	C1orf131	0.17
Breast_SE_520	SIPA1L2	0.38	SNRPD2P2	0.3	LOC149373	0.18	TRIM67	0.13	TTC13	0.02	MAP10	0	LINC00582	0	ARV1	0	C1orf131	0	NTPCR	-0.1
Breast_SE_524	TSNAX-DISC1	0.37	KCNK1	0.32	MIR4671	0.31	LINC00184	0.29	SNRPD2P2	0.29	LOC101927787	0.28	DISC1	0.28	NTPCR	0.23	TARBP1	0.22	TSNAX	0.21
Breast_SE_527	LOC101927851	0.59	LINC01132	0.38	LINC01354	0.38	SNORA14B	0.38	KCNK1	0.35	TARBP1	0.2	SIPA1L2	0.19	MIR4671	0.17	LOC101927765	0.13	LINC01348	0.07
Breast_SE_528	SLC35F3	0.8	LOC101927787	0.27	MIR4671	0.19	TOMM20	0.15	MAP10	0.11	COA6	0.1	LOC101927765	0.09	KCNK1	0.09	RBM34	0.02	SNORA14B	0
Breast_SE_530	IRF2BP2	0.62	LOC101927851	0.59	TARBP1	0.59	LINC01132	0.46	ARID4B	0.39	LINC01348	0.38	LINC01354	0.34	MIR4671	0.29	MIR4427	0.26	RBM34	0.25
Breast_SE_531	LOC101927851	0.55	LINC01348	0.45	IRF2BP2	0.42	TARBP1	0.41	LINC01132	0.35	ARID4B	0.29	MIR4671	0.29	GGPS1	0.25	MIR4753	0.22	PP2672	0.18
Breast_SE_532	ARID4B	0.55	LOC101927851	0.54	TARBP1	0.48	LINC01132	0.44	GGPS1	0.3	LINC01354	0.29	GNG4	0.26	LINC01348	0.26	IRF2BP2	0.26	RBM34	0.25
Breast_SE_533	ARID4B	0.76	GGPS1	0.65	RBM34	0.53	TBCE	0.41	IRF2BP2	0.4	GNG4	0.39	LINC01132	0.38	LOC101927851	0.37	TOMM20	0.33	MIR4753	0.23
Breast_SE_534	ARID4B	0.65	TBCE	0.47	GGPS1	0.45	RBM34	0.44	GNG4	0.42	LOC101927851	0.35	GPR137B	0.33	MIR4753	0.25	LINC01132	0.24	MIR1537	0.22
Breast_SE_535	ARID4B	0.65	TBCE	0.47	GGPS1	0.45	RBM34	0.44	GNG4	0.42	LOC101927851	0.35	GPR137B	0.33	MIR4753	0.25	LINC01132	0.24	MIR1537	0.22
Breast_SE_536	ARID4B	0.65	TBCE	0.47	GGPS1	0.45	RBM34	0.44	GNG4	0.42	LOC101927851	0.35	GPR137B	0.33	MIR4753	0.25	LINC01132	0.25	MIR1537	0.22
Breast_SE_537	ARID4B	0.66	TBCE	0.47	GGPS1	0.45	RBM34	0.44	GNG4	0.41	LOC101927851	0.35	GPR137B	0.32	MIR4753	0.25	LINC01132	0.25	MIR1537	0.22
Breast_SE_538	LYST	0.61	NID1	0.42	SNORA14B	0.27	MIR1537	0.21	MIR4753	0.2	TBCE	0.14	GNG4	0.13	HEATR1	0.12	GPR137B	0.12	LOC101927851	0.11
Breast_SE_539	GPR137B	0.72	GGPS1	0.46	LGALS8	0.45	LGALS8-AS1	0.41	ARID4B	0.35	TBCE	0.3	MIR4753	0.28	B3GALNT2	0.23	RYR2	0.17	HEATR1	0.16
Breast_SE_540	LGALS8-AS1	0.57	LGALS8	0.56	GPR137B	0.42	MIR4753	0.23	GGPS1	0.19	ARID4B	0.16	B3GALNT2	0.13	HEATR1	0.08	MIR4428	0.06	TBCE	0.05
Breast_SE_543	MAP1LC3C	0.7	RGS7	0.62	FMN2	0.57	RPS7P5	0.47	LOC100130331	0.32	ZP4	0.31	CHML	0.3	FH	0.27	LINC01139	0.18	EXO1	0.15
Breast_SE_545	CHML	0.42	KMO	0.3	CHRM3-AS1	0.25	CHRM3-AS2	0.22	OPN3	0.2	PLD5	0.2	WDR64	0.11	AKT3	0.07	FH	0.06	RPS7P5	0.05
Breast_SE_547	CEP170	0.37	OPN3	0.23	AKT3	0.21	ZBTB18	0.19	KMO	0.1	PLD5	0.06	LOC101928068	0.05	SDCCAG8	0.02	MAP1LC3C	0	DESI2	0
Breast_SE_550	LOC339529	0.44	LOC101928068	0.34	LINC01347	0.27	ADSS	0.25	ZBTB18	0.21	DESI2	0.06	COX20	0.02	MIR4677	0	HNRNPU	0	KIF26B	0
Breast_SE_551	ADSS	0.51	LOC101928068	0.42	ZBTB18	0.3	LINC01341	0.22	LINC01347	0.22	C1orf100	0.18	LOC339529	0.14	COX20	0.13	HNRNPU	0.1	DESI2	0.1
Breast_SE_552	DESI2	0.42	EFCAB2	0.39	SMYD3	0.34	CNST	0.33	ZBTB18	0.3	LOC101928068	0.27	C1orf100	0.25	SCCPDH	0.22	ADSS	0.22	COX20	0.22
Breast_SE_553	CNST	0.41	DESI2	0.41	EFCAB2	0.4	SMYD3	0.39	LOC101928068	0.32	ADSS	0.27	COX20	0.22	KIF26B	0.22	C1orf100	0.21	HNRNPU	0.19
Breast_SE_554	KIF26B	0.84	CNST	0.58	SCCPDH	0.44	SMYD3	0.44	DESI2	0.36	EFCAB2	0.34	AKT3	0.3	COX20	0.25	ADSS	0.24	MIR4677	0.24
Breast_SE_555	KIF26B	0.84	CNST	0.58	SCCPDH	0.44	SMYD3	0.44	DESI2	0.36	EFCAB2	0.34	AKT3	0.3	COX20	0.25	ADSS	0.24	MIR4677	0.24
Breast_SE_556	KIF26B	0.74	SMYD3	0.51	CNST	0.48	DESI2	0.43	FLJ39095	0.35	EFCAB2	0.35	COX20	0.31	ZNF670-ZNF695	0.2	ZBTB18	0.19	HNRNPU	0.14
Breast_SE_557	KIF26B	0.68	SMYD3	0.68	CNST	0.51	SCCPDH	0.51	EFCAB2	0.42	COX20	0.35	DESI2	0.33	FLJ39095	0.31	ZNF670-ZNF695	0.15	TFB2M	0.1
Breast_SE_559	KIF26B	0.75	CNST	0.56	DESI2	0.5	SCCPDH	0.5	SMYD3	0.43	LINC01341	0.41	LOC101928068	0.37	ZNF670	0.3	ZNF695	0.27	COX20	0.25
Breast_SE_560	HNRNPU	0.53	LOC101928068	0.4	MIR3916	0.38	KIF26B	0.29	ZNF496	0.28	ZNF124	0.25	ZNF670-ZNF695	0.24	CNST	0.17	AHCTF1	0.16	ZNF695	0.14
Breast_SE_561	MIR3916	0.34	ZNF496	0.26	KIF26B	0.19	AHCTF1	0.16	LOC101928068	0.16	SCCPDH	0.12	SMYD3	0.06	NLRP3	0.05	C1orf229	0.04	LINC01341	0.02
Breast_SE_562	SMYD3	0.38	ZNF670-ZNF695	0.35	LINC01341	0.33	CNST	0.32	ZNF669	0.26	ZNF695	0.26	ZNF670	0.2	C1orf229	0.19	SCCPDH	0.17	ZNF496	0.1
Breast_SE_563	PGBD2	0.58	MIR3124	0.48	ZNF672	0.38	ZNF692	0.28	SH3BP5L	0.27	OR14I1	0.15	OR2T6	0.1	OR2T4	0.09	OR2T27	0	OR2T35	0
Breast_SE_564	FAM110C	0.93	SH3YL1	0.64	ACP1	0.55	TPO	0.55	TMEM18	0.54	LINC01115	0.23	PXDN	0.12	SNTG2	0.1	RNASEH1	0.04	ADI1	0.03
Breast_SE_566	PXDN	0.81	SH3YL1	0.45	TMEM18	0.41	TPO	0.37	MYT1L	0.26	FAM110C	0.22	SNTG2	0.18	MYT1L-AS1	0.16	RNASEH1-AS1	0.14	LOC101060391	0.13
Breast_SE_567	LINC01250	0.97	LINC01249	0.96	LINC01304	0.09	RNASEH1-AS1	0.08	ADI1	0.08	TPO	0.03	TRAPPC12	0	LOC101060391	0	LINC01115	0	DCDC2C	0
Breast_SE_568	TRAPPC12	0.51	RNASEH1-AS1	0.48	RNASEH1	0.43	ADI1	0.3	ALLC	0.19	COLEC11	0.19	DCDC2C	0.16	LINC01304	0.14	MYT1L-AS1	0.09	RPS7	0.07
Breast_SE_569	SOX11	0.92	LINC01248	0.66	LINC01105	0.53	RNF144A	0.52	CMPK2	0.46	LOC400940	0.44	LOC100506274	0.42	RSAD2	0.41	MIR7515	0.4	MIR7515HG	0.4
Breast_SE_570	RSAD2	0.66	RNF144A	0.61	CMPK2	0.57	LOC101929452	0.39	ID2	0.28	RNF144A-AS1	0.21	SOX11	0.08	LINC00487	0.05	LINC01248	0.03	LINC00298	0.02
Breast_SE_572	LOC101929551	0.58	MIR7515	0.47	MIR7515HG	0.46	LOC100506274	0.44	ID2-AS1	0.39	LINC01247	0.39	ASAP2	0.14	RNF144A	0.09	LINC01246	0	LINC00299	0
Breast_SE_573	GRHL1	0.67	ID2-AS1	0.63	ID2	0.51	IAH1	0.34	LOC101929452	0.31	LOC100506274	0.28	LINC00298	0.28	LOC101929882	0.28	RNF144A	0.18	KIDINS220	0.13
Breast_SE_574	ID2	0.85	ID2-AS1	0.69	GRHL1	0.32	KLF11	0.3	LINC00298	0.22	LOC101929882	0.2	CYS1	0.18	LOC101929551	0.16	IAH1	0.14	LOC100506274	0.11
Breast_SE_575	CPSF3	0.73	MBOAT2	0.64	IAH1	0.5	ADAM17	0.42	KLF11	0.4	ITGB1BP1	0.38	C2orf48	0.33	TAF1B	0.32	GRHL1	0.28	ASAP2	0.27
Breast_SE_577	HPCAL1	0.61	ITGB1BP1	0.61	ASAP2	0.41	TAF1B	0.32	MBOAT2	0.3	IAH1	0.27	YWHAQ	0.26	ADAM17	0.24	LINC00299	0.18	CYS1	0.15
Breast_SE_578	HPCAL1	0.59	ITGB1BP1	0.48	C2orf48	0.4	CPSF3	0.29	IAH1	0.25	TAF1B	0.14	MIR4261	0.14	YWHAQ	0.11	ASAP2	0.11	KLF11	0.09
Breast_SE_579	IAH1	0.55	HPCAL1	0.45	ITGB1BP1	0.35	YWHAQ	0.34	ID2	0.32	LOC101929882	0.31	CYS1	0.25	TAF1B	0.19	CPSF3	0.19	ID2-AS1	0.17
Breast_SE_580	KLF11	0.48	IAH1	0.48	CPSF3	0.47	GRHL1	0.44	HPCAL1	0.41	MBOAT2	0.4	LOC101929882	0.31	ASAP2	0.31	YWHAQ	0.28	NOL10	0.25
Breast_SE_581	GRHL1	0.67	KLF11	0.62	C2orf48	0.47	LOC101929882	0.42	IAH1	0.32	CPSF3	0.24	MIR4261	0.21	ADAM17	0.17	NOL10	0.15	CYS1	0.14
Breast_SE_582	CPSF3	0.49	C2orf48	0.48	IAH1	0.47	KLF11	0.32	MIR4261	0.3	TAF1B	0.26	ADAM17	0.24	ITGB1BP1	0.2	CYS1	0.17	LOC101929715	0.16
Breast_SE_583	HPCAL1	0.77	IAH1	0.38	YWHAQ	0.37	ATP6V1C2	0.36	LOC101929715	0.36	PDIA6	0.36	ODC1	0.34	CPSF3	0.3	SNORA80B	0.22	RRM2	0.21
Breast_SE_586	LOC101929882	0.45	C2orf50	0.44	KLF11	0.42	E2F6	0.35	FLJ33534	0.35	NOL10	0.23	KCNF1	0.19	LINC00570	0.19	MIR4261	0.19	C2orf48	0.16
Breast_SE_587	ROCK2	0.46	MIR3681	0.3	LINC00570	0.27	E2F6	0.21	LOC101929715	0.16	ODC1	0.08	MIR4262	0	KCNF1	0	FLJ33534	0	MIR548S	0
Breast_SE_588	MIR4429	0.82	GREB1	0.81	LINC00570	0.61	KCNF1	0.6	NTSR2	0.59	FLJ33534	0.58	E2F6	0.43	PQLC3	0.29	MIR4262	0	MIR548S	0
Breast_SE_589	LPIN1	0.62	MIR3125	0.28	LOC101929715	0.21	E2F6	0.15	ROCK2	0.11	MIR548S	0.1	MIR4262	0	C2orf50	0	LINC00570	0	KCNF1	0
Breast_SE_590	TRIB2	0.63	LOC100506474	0.43	LINC00276	0.32	FAM84A	0.23	PDIA6	0.19	LINC00570	0.17	PQLC3	0.15	MIR3125	0.14	LPIN1	0.04	ROCK2	0
Breast_SE_593	MYCN	0.69	MYCNOS	0.64	GEN1	0.51	MYCNUT	0.4	FAM49A	0.4	LINC01376	0.36	MIR3125	0.33	RAD51AP2	0.29	DDX1	0.27	KCNS3	0.26
Breast_SE_595	VSNL1	0.75	OSR1	0.57	RAD51AP2	0.56	SMC6	0.56	FAM49A	0.31	GEN1	0.28	KCNS3	0.27	RDH14	0.23	NBAS	0.2	TTC32	0.17
Breast_SE_597	MIR4757	0.42	LINC01376	0.39	OSR1	0.36	KCNS3	0.33	SMC6	0.29	LINC00954	0.28	GEN1	0.23	TTC32	0.2	RHOB	0.14	NT5C1B	0.14
Breast_SE_598	OSR1	0.65	LAPTM4A	0.47	RDH14	0.39	NT5C1B-RDH14	0.35	MATN3	0.32	MIR4757	0.32	WDR35	0.23	LINC01376	0.22	SDC1	0.22	TTC32	0.18
Breast_SE_599	OSR1	0.39	LINC00954	0.28	LAPTM4A	0.13	HS1BP3	0.13	MIR4757	0.11	LOC101928222	0.07	RDH14	0.07	APOB	0.02	NT5C1B	0	WDR35	0
Breast_SE_600	OSR1	0.58	LINC00954	0.2	LAPTM4A	0.18	MIR4757	0.17	HS1BP3	0.13	TTC32	0.1	HS1BP3-IT1	0.07	SDC1	0	RDH14	0	WDR35	0
Breast_SE_602	SDC1	0.69	LAPTM4A	0.36	RDH14	0.35	PUM2	0.35	TTC32	0.35	NT5C1B	0.34	NT5C1B-RDH14	0.33	RHOB	0.22	LINC01376	0.18	APOB	0.15
Breast_SE_604	RHOB	0.44	LOC101928222	0.35	HS1BP3	0.29	LINC01376	0.29	PUM2	0.27	APOB	0.26	RDH14	0.21	NT5C1B-RDH14	0.19	LINC00954	0.15	MATN3	0.15
Breast_SE_606	ATAD2B	0.57	DNMT3A	0.56	UBXN2A	0.49	NCOA1	0.46	DNAJC27-AS1	0.39	EFR3B	0.39	DNAJC27	0.34	PFN4	0.32	PTRHD1	0.28	CENPO	0.23
Breast_SE_609	ADCY3	0.45	CENPO	0.42	ITSN2	0.38	PTRHD1	0.37	POMC	0.34	SF3B6	0.32	DTNB	0.26	PFN4	0.25	TP53I3	0.24	UBXN2A	0.24
Breast_SE_610	DNMT3A	0.71	EFR3B	0.45	DTNB	0.39	NCOA1	0.38	MIR1301	0.26	ITSN2	0.24	DNAJC27-AS1	0.21	DNAJC27	0.18	PFN4	0.06	POMC	0
Breast_SE_611	OTOF	0.41	HADHB	0.31	MAPRE3	0.3	DNAJC27-AS1	0.26	ASXL2	0.23	RAB10	0.22	HADHA	0.21	SLC35F6	0.18	DTNB	0.18	EFR3B	0.16
Breast_SE_613	KCNK3	0.46	SLC35F6	0.44	CIB4	0.4	OTOF	0.35	CENPA	0.31	AGBL5	0.11	PRR30	0.09	DRC1	0.09	C2orf70	0.08	CGREF1	0.06
Breast_SE_614	EMILIN1	0.66	SLC30A3	0.48	TMEM214	0.46	DNAJC5G	0.41	AGBL5	0.41	CENPA	0.33	OST4	0.33	PRR30	0.26	MAPRE3	0.24	CGREF1	0.22
Breast_SE_615	SLC5A6	0.24	DNAJC5G	0.22	CGREF1	0.1	TRIM54	0.09	EMILIN1	0.07	SLC30A3	0.04	AGBL5	0.02	AGBL5-AS1	0	TCF23	0	ATRAID	0
Breast_SE_616	IFT172	0.25	KRTCAP3	0.24	DNAJC5G	0.21	UCN	0.1	SLC30A3	0.08	MPV17	0.02	FTH1P3	0	ATRAID	0	GCKR	0	SNX17	-0.1
Breast_SE_617	KRTCAP3	0.48	TRIM54	0.26	IFT172	0.12	DNAJC5G	0.1	SLC30A3	0.04	C2orf16	0	NRBP1	-0.1	GCKR	-0.1	PPM1G	-0.1	ZNF512	-0.1
Breast_SE_618	KRTCAP3	0.21	GCKR	0.07	ZNF512	0.07	IFT172	0	RBKS	0	MRPL33	0	BRE-AS1	0	C2orf16	-0.1	FTH1P3	-0.1	ZNF513	-0.1
Breast_SE_619	FLJ31356	0.52	FOSL2	0.42	FNDC4	0.37	MRPL33	0.34	GCKR	0.27	RBKS	0.25	LOC100505716	0.08	KRTCAP3	0.04	C2orf16	0.04	MIR4263	0
Breast_SE_620	FLJ31356	0.74	MRPL33	0.54	RBKS	0.39	FNDC4	0.3	FOSL2	0.29	KRTCAP3	0.15	MIR4263	0.14	GCKR	0.13	C2orf16	0.11	GPN1	0.09
Breast_SE_622	FOSL2	0.81	MRPL33	0.45	FLJ31356	0.42	GPN1	0.25	SNORD53	0.24	SNORD92	0.17	LOC100505716	0.11	SLC4A1AP	0.11	WDR43	0.1	MIR4263	0.08
Breast_SE_623	PLB1	0.29	LOC100505774	0.28	C2orf71	0.25	SNORD53	0.22	CLIP4	0.13	FLJ31356	0.09	ALK	0	FOSL2	0	LOC100505716	0	PPP1CB	0
Breast_SE_625	C2orf71	0.81	CLIP4	0.38	SNORD53	0.36	FLJ31356	0.29	BRE-AS1	0.23	RBKS	0.12	WDR43	0.07	MIR4263	0.03	FOSL2	0.03	ALK	0
Breast_SE_626	CLIP4	0.79	SNORD53	0.55	WDR43	0.48	C2orf71	0.38	FOSL2	0.29	BRE-AS1	0.27	FLJ31356	0.24	MIR4263	0.19	LOC100505736	0.02	SNORD92	0.01
Breast_SE_627	LBH	0.69	LOC285043	0.44	PPP1CB	0.4	LOC100505774	0.33	SRD5A2	0.31	YPEL5	0.22	ALK	0.16	SNORD92	0.16	CAPN13	0.1	TRMT61B	0.08
Breast_SE_630	XDH	0.39	GALNT14	0.36	LBH	0.05	YIPF4	0.03	BIRC6	0.02	LOC285043	0.02	NLRC4	0.01	TTC27	0	MIR558	0	EHD3	0
Breast_SE_634	CRIM1	0.76	LOC100288911	0.74	CDC42EP3	0.58	QPCT	0.42	FEZ2	0.38	VIT	0.31	PRKD3	0.22	LINC00211	0.18	EIF2AK2	0.15	GPATCH11	0.15
Breast_SE_635	VIT	0.75	LOC100288911	0.58	CRIM1	0.47	FEZ2	0.47	RMDN2	0.35	CDC42EP3	0.3	QPCT	0.25	GPATCH11	0.25	LINC00211	0.21	NDUFAF7	0.13
Breast_SE_636	CDC42EP3	0.83	LINC00211	0.4	PRKD3	0.32	RMDN2	0.29	VIT	0.24	GPATCH11	0.15	QPCT	0.12	EIF2AK2	0.1	CEBPZOS	0.08	CEBPZ	0
Breast_SE_637	CDC42EP3	0.63	LINC00211	0.38	RMDN2	0.31	LOC101929596	0.23	GPATCH11	0.16	QPCT	0.07	CYP1B1	0.06	GALM	0.06	CEBPZOS	0	PRKD3	0
Breast_SE_638	CYP1B1-AS1	0.62	CYP1B1	0.53	RMDN2-AS1	0.33	ATL2	0.32	RMDN2	0.29	SULT6B1	0.21	LOC101929596	0.21	PRKD3	0.2	EIF2AK2	0.2	NDUFAF7	0.09
Breast_SE_639	ATL2	0.53	CYP1B1-AS1	0.39	RMDN2-AS1	0.35	LOC101929596	0.35	LOC375196	0.3	SOS1	0.23	MAP4K3	0.19	CYP1B1	0.16	GALM	0.03	ARHGEF33	0.01
Breast_SE_641	GALM	0.33	RMDN2-AS1	0.25	LOC101929596	0.21	MAP4K3	0.15	HNRNPLL	0.06	LOC728730	0.06	CYP1B1	0.05	CYP1B1-AS1	0.04	MORN2	0.03	SRSF7	0
Breast_SE_642	SOS1	0.51	HNRNPLL	0.17	MAP4K3	0.17	GALM	0.14	TMEM178A	0.11	CYP1B1-AS1	0.11	ATL2	0.04	LOC728730	0.01	MORN2	0	CYP1B1	0
Breast_SE_643	LOC728730	0.79	MAP4K3	0.62	GALM	0.59	TMEM178A	0.39	LOC101929596	0.37	HNRNPLL	0.27	CDKL4	0.16	GEMIN6	0.13	CYP1B1	0.09	CYP1B1-AS1	0.04
Breast_SE_644	LOC102723824	0.64	PKDCC	0.47	HAAO	0.31	KCNG3	0.28	PLEKHH2	0.17	ABCG8	0.15	C2orf91	0.09	LINC01126	0.07	OXER1	0.03	EML4	0
Breast_SE_646	LOC102723824	0.49	EML4	0.28	PKDCC	0.15	KCNG3	0.13	COX7A2L	0.1	SLC8A1	0.08	HAAO	0.05	OXER1	0.02	C2orf91	0	LINC01126	0
Breast_SE_647	MTA3	0.77	DYNC2LI1	0.55	EML4	0.55	PPM1B	0.53	LRPPRC	0.45	SLC3A1	0.37	COX7A2L	0.36	PREPL	0.32	KCNG3	0.3	PLEKHH2	0.27
Breast_SE_648	KCNG3	0.41	PKDCC	0.33	HAAO	0.29	SLC3A1	0.28	OXER1	0.24	COX7A2L	0.22	PPM1B	0.22	MTA3	0.21	PLEKHH2	0.2	LINC01126	0.06
Breast_SE_649	PKDCC	0.54	LINC01126	0.52	ZFP36L2	0.42	PLEKHH2	0.36	OXER1	0.34	HAAO	0.33	EML4	0.16	ABCG5	0.11	THADA	0.1	PPM1B	0.08
Breast_SE_650	OXER1	0.52	HAAO	0.48	PPM1B	0.38	PLEKHH2	0.34	SIX2	0.2	SLC3A1	0.16	CAMKMT	0.15	ZFP36L2	0.13	ABCG5	0.09	SRBD1	0.06
Breast_SE_652	LOC101805491	0.56	PLEKHH2	0.39	SIX3-AS1	0.37	SIX3	0.35	SIX2	0.23	TMEM247	0.21	PPM1B	0.21	CAMKMT	0.16	SLC3A1	0.12	ATP6V1E2	0.11
Breast_SE_653	SIX2	0.79	RHOQ	0.46	PRKCE	0.27	LINC01121	0.26	TMEM247	0.26	SIX3-AS1	0.25	SIX3	0.18	PLEKHH2	0.08	LOC101805491	0.02	EPAS1	0.01
Breast_SE_654	LINC01121	0.68	TMEM247	0.34	RHOQ	0.27	SIX2	0.27	ABCG8	0.17	EPAS1	0.1	LRPPRC	0.02	SIX3	0	LOC100506142	0	SIX3-AS1	0
Breast_SE_656	EPAS1	0.5	LINC01121	0.44	RHOQ	0.39	TMEM247	0.33	PIGF	0.23	SIX2	0.17	LINC01119	0.16	MCFD2	0.11	ATP6V1E2	0.1	LOC100506142	0.1
Breast_SE_657	EPAS1	0.76	LOC101927043	0.36	TTC7A	0.35	PIGF	0.24	CALM2	0.24	ATP6V1E2	0.22	TMEM247	0.19	CRIPT	0.18	MCFD2	0.16	LINC01119	0.15
Breast_SE_659	SOCS5	0.67	CRIPT	0.6	BCYRN1	0.6	LINC01118	0.51	LINC01119	0.49	RHOQ	0.4	CALM2	0.28	ATP6V1E2	0.17	EPAS1	0.12	TMEM247	0.09
Breast_SE_660	LINC01119	0.53	SOCS5	0.47	MCFD2	0.47	LINC01118	0.42	RHOQ	0.4	BCYRN1	0.36	CRIPT	0.3	CALM2	0.27	EPAS1	0.26	LOC100506142	0.24
Breast_SE_661	ATP6V1E2	0.63	LOC101927043	0.49	CALM2	0.45	CRIPT	0.34	BCYRN1	0.22	KCNK12	0.22	RHOQ	0.2	PIGF	0.18	MSH6	0.18	MSH2	0.16
Breast_SE_662	EPCAM	0.67	ATP6V1E2	0.64	MIR559	0.57	LOC101927043	0.51	MSH2	0.41	LOC100506142	0.36	MSH6	0.25	KCNK12	0.25	CALM2	0.22	TTC7A	0.15
Breast_SE_663	KCNK12	0.65	LOC101927043	0.56	EPCAM	0.5	MIR559	0.48	GTF2A1L	0.39	PPP1R21	0.24	MSH2	0.2	MSH6	0.18	STON1	0.08	FBXO11	0.06
Breast_SE_664	MSH6	0.47	HCG2040054	0.38	FOXN2	0.32	KCNK12	0.31	FBXO11	0.28	FSHR	0.22	LINC01119	0.17	LHCGR	0.06	CALM2	0.03	MIR559	0
Breast_SE_665	MSH6	0.47	HCG2040054	0.37	FOXN2	0.31	KCNK12	0.3	FBXO11	0.27	FSHR	0.21	LINC01119	0.15	LHCGR	0.04	CALM2	0.02	MIR559	0
Breast_SE_666	MSH6	0.46	HCG2040054	0.37	FOXN2	0.31	KCNK12	0.3	FBXO11	0.27	FSHR	0.21	LINC01119	0.15	LHCGR	0.05	CALM2	0.02	MIR559	0
Breast_SE_667	MSH6	0.46	HCG2040054	0.37	FOXN2	0.31	KCNK12	0.3	FBXO11	0.27	FSHR	0.21	LINC01119	0.15	LHCGR	0.05	CALM2	0.02	MIR559	0
Breast_SE_668	MSH6	0.46	HCG2040054	0.37	FOXN2	0.31	KCNK12	0.3	FBXO11	0.27	FSHR	0.21	LINC01119	0.15	LHCGR	0.04	CALM2	0.02	MIR559	0
Breast_SE_669	FOXN2	0.67	LHCGR	0.44	FBXO11	0.37	MCFD2	0.31	MSH6	0.28	FSHR	0.28	HCG2040054	0.22	STON1	0.21	STON1-GTF2A1L	0.19	CALM2	0.17
Breast_SE_670	LHCGR	0.48	FOXN2	0.47	FBXO11	0.35	KCNK12	0.21	STON1	0.2	MSH6	0.19	TTC7A	0.16	LOC101927043	0.16	STON1-GTF2A1L	0.15	HCG2040054	0.13
Breast_SE_672	NRXN1	0.87	GTF2A1L	0.79	LOC101927043	0.79	MSH2	0.52	EPCAM	0.44	STON1-GTF2A1L	0.43	STON1	0.41	PPP1R21	0.31	MIR559	0.22	KCNK12	0.17
Breast_SE_673	PSME4	0.63	EML6	0.55	GPR75	0.49	SPTBN1	0.47	MIR4431	0.37	CLHC1	0.36	ACYP2	0.33	RTN4	0.31	ERLEC1	0.29	TSPYL6	0.25
Breast_SE_674	SPTBN1	0.62	EML6	0.52	CCDC88A	0.46	RTN4	0.42	PSME4	0.36	RPL23AP32	0.34	PRORSD1P	0.3	GPR75	0.29	C2orf73	0.28	CHAC2	0.21
Breast_SE_675	CFAP36	0.49	EML6	0.47	PSME4	0.44	ACYP2	0.38	EFEMP1	0.35	C2orf73	0.34	RTN4	0.31	CLHC1	0.25	RPL23AP32	0.22	MTIF2	0.2
Breast_SE_676	CFAP36	0.56	CLHC1	0.53	RTN4	0.44	TSPYL6	0.36	EFEMP1	0.35	CCDC85A	0.31	RPL23AP32	0.29	CCDC88A	0.27	C2orf73	0.26	EML6	0.22
Breast_SE_678	EFEMP1	0.76	RTN4	0.46	TSPYL6	0.4	CLHC1	0.29	PNPT1	0.21	CCDC88A	0.19	SPTBN1	0.18	CCDC85A	0.16	LOC100129434	0.16	CFAP36	0.1
Breast_SE_679	BCL11A	0.77	B3GNT2	0.57	MIR5192	0.35	KIAA1841	0.35	AHSA2	0.3	LINC01185	0.24	REL	0.2	PEX13	0.2	USP34	0.17	PAPOLG	0.13
Breast_SE_681	PEX13	0.52	AHSA2	0.44	XPO1	0.4	USP34	0.4	REL	0.33	PUS10	0.31	LINC01185	0.27	MIR5192	0.25	KIAA1841	0.25	SNORA70B	0.14
Breast_SE_683	FAM161A	0.6	XPO1	0.54	PEX13	0.36	LINC01185	0.3	KIAA1841	0.24	PAPOLG	0.23	REL	0.22	TMEM17	0.14	CCT4	0.09	SNORA70B	0.07
Breast_SE_684	XPO1	0.55	FAM161A	0.52	COMMD1	0.5	PEX13	0.43	REL	0.34	LINC01185	0.32	PAPOLG	0.26	TMEM17	0.22	CCT4	0.13	C2orf74	0.13
Breast_SE_685	XPO1	0.55	FAM161A	0.52	COMMD1	0.5	PEX13	0.43	REL	0.34	LINC01185	0.32	PAPOLG	0.26	TMEM17	0.22	CCT4	0.13	C2orf74	0.13
Breast_SE_686	XPO1	0.55	FAM161A	0.52	COMMD1	0.5	PEX13	0.43	REL	0.34	LINC01185	0.32	PAPOLG	0.26	TMEM17	0.22	CCT4	0.13	C2orf74	0.13
Breast_SE_687	XPO1	0.55	FAM161A	0.52	COMMD1	0.5	PEX13	0.43	REL	0.34	LINC01185	0.32	PAPOLG	0.26	TMEM17	0.22	CCT4	0.13	C2orf74	0.13
Breast_SE_688	XPO1	0.55	FAM161A	0.52	COMMD1	0.5	PEX13	0.43	REL	0.34	LINC01185	0.32	PAPOLG	0.26	TMEM17	0.22	CCT4	0.13	C2orf74	0.13
Breast_SE_689	XPO1	0.55	FAM161A	0.52	COMMD1	0.5	PEX13	0.43	REL	0.34	LINC01185	0.32	PAPOLG	0.26	TMEM17	0.22	CCT4	0.13	C2orf74	0.13
Breast_SE_690	XPO1	0.55	FAM161A	0.52	COMMD1	0.49	PEX13	0.43	REL	0.34	LINC01185	0.32	PAPOLG	0.26	TMEM17	0.22	CCT4	0.13	C2orf74	0.13
Breast_SE_691	KIAA1841	0.65	PEX13	0.46	DBIL5P2	0.45	B3GNT2	0.38	PUS10	0.37	WDPCP	0.36	USP34	0.22	OTX1	0.21	AHSA2	0.2	FAM161A	0.19
Breast_SE_692	PEX13	0.53	WDPCP	0.52	USP34	0.49	AHSA2	0.42	KIAA1841	0.4	DBIL5P2	0.37	MIR5192	0.22	SNORA70B	0.19	B3GNT2	0.18	OTX1	0.18
Breast_SE_694	OTX1	0.77	LOC100507006	0.25	MIR5192	0.23	PELI1	0.08	DBIL5P2	0.07	VPS54	0.06	FAM161A	0.02	MIR4433B	0	MIR4433A	0	LOC100132215	0
Breast_SE_695	LINC00309	0.38	UGP2	0.35	WDPCP	0.28	MDH1	0.28	LOC100507006	0.2	LOC100132215	0.2	SLC1A4	0.18	EHBP1	0.12	PELI1	0.11	SERTAD2	0.11
Breast_SE_698	PELI1	0.48	LOC100507006	0.44	LOC101927402	0.44	LINC00309	0.35	WDPCP	0.3	LOC339807	0.28	LGALSL	0.27	AFTPH	0.21	UGP2	0.2	MDH1	0.16
Breast_SE_699	AFTPH	0.47	LOC339807	0.42	LOC101927402	0.32	SERTAD2	0.32	WDPCP	0.24	MDH1	0.17	ACTR2	0.14	LINC00309	0.12	PELI1	0.09	UGP2	0.03
Breast_SE_700	SERTAD2	0.78	ACTR2	0.27	MDH1	0.16	SLC1A4	0.11	UGP2	0.1	LOC339807	0.04	MIR4433B	0	MIR4778	0	MIR4434	0	PELI1	0
Breast_SE_701	SLC1A4	0.57	SERTAD2	0.43	PELI1	0.39	UGP2	0.29	VPS54	0.29	CEP68	0.28	ACTR2	0.19	LGALSL	0.14	LOC339807	0.14	LINC00309	0.11
Breast_SE_702	SPRED2	0.86	CEP68	0.31	MEIS1	0.29	SLC1A4	0.26	MEIS1-AS3	0.23	LGALSL	0.16	RAB1A	0.1	LINC00309	0.09	AFTPH	0.08	MEIS1-AS2	0.05
Breast_SE_709	BMP10	0.41	ARHGAP25	0.4	ANTXR1	0.17	AAK1	0.15	WDR92	0.06	APLF	0	PNO1	0	CNRIP1	0	NFU1	0	FBXO48	0
Breast_SE_711	ANTXR1	0.79	CNRIP1	0.53	NFU1	0.37	PNO1	0.28	MIR3126	0.27	SNRNP27	0.25	FBXO48	0.15	BMP10	0.14	APLF	0.05	ANXA4	0.01
Breast_SE_712	SNORA36C	0.58	GMCL1	0.47	ANXA4	0.42	PCBP1-AS1	0.39	TIA1	0.29	FAM136A	0.26	GFPT1	0.19	SNRNP27	0.15	SNRPG	0.1	MXD1	0.02
Breast_SE_713	MXD1	0.35	AAK1	0.29	FAM136A	0.24	PCBP1	0.22	TGFA	0.21	ADD2	0.13	SNRNP27	0.12	GMCL1	0.05	SNRPG	0.02	PCYOX1	0
Breast_SE_715	PCBP1-AS1	0.51	FAM136A	0.43	GMCL1	0.41	SNRNP27	0.35	ANXA4	0.31	SNORA36C	0.29	FIGLA	0.29	NFU1	0.21	TIA1	0.16	C2orf42	0.15
Breast_SE_716	ANXA4	0.41	GMCL1	0.32	VAX2	0.32	CD207	0.23	CLEC4F	0.2	FIGLA	0.12	SNRNP27	0.08	FAM136A	0.05	TIA1	0.05	PCYOX1	0.03
Breast_SE_718	TGFA	0.82	TEX261	0.42	OR7E91P	0.4	TGFA-IT1	0.37	ADD2	0.27	PCYOX1	0.14	ATP6V1B1-AS1	0.12	FAM136A	0.09	PCBP1	0.08	ATP6V1B1	0.01
Breast_SE_719	VAX2	0.75	ATP6V1B1	0.63	CD207	0.61	CLEC4F	0.46	MCEE	0.41	FIGLA	0.38	FAM136A	0.37	MPHOSPH10	0.35	SNRPG	0.3	ADD2	0.21
Breast_SE_720	MCEE	0.7	MPHOSPH10	0.51	NAGK	0.39	OR7E91P	0.35	PAIP2B	0.33	ATP6V1B1	0.18	FIGLA	0.17	ZNF638	0.16	SNRPG	0.15	CD207	0.14
Breast_SE_722	MCEE	0.53	SPR	0.39	OR7E91P	0.38	ATP6V1B1	0.24	PAIP2B	0.22	NAGK	0.2	VAX2	0.12	MPHOSPH10	0.09	ADD2	0.05	ZNF638	0
Breast_SE_723	MCEE	0.42	NAGK	0.32	ATP6V1B1	0.22	MPHOSPH10	0.16	OR7E91P	0.14	VAX2	0.1	PAIP2B	0	ZNF638	0	SPR	0	CYP26B1	0
Breast_SE_725	RAB11FIP5	0.5	CCT7	0.28	C2orf78	0.1	DUSP11	0.09	ALMS1-IT1	0.08	SMYD5	0.04	EMX1	0.02	ACTG2	0	SFXN5	0	PRADC1	0
Breast_SE_726	ACTG2	0.89	DCTN1-AS1	0.54	DCTN1	0.41	ALMS1	0.28	MTHFD2	0.14	MOB1A	0	TPRKB	0	DUSP11	0	TET3	0	BOLA3-AS1	0
Breast_SE_727	TET3	0.65	C2orf81	0.59	NAT8B	0.57	RTKN	0.3	NAT8	0.29	SLC4A5	0.26	MTHFD2	0.18	STAMBP	0.16	TPRKB	0.06	DCTN1-AS1	0
Breast_SE_728	TET3	0.57	WBP1	0.41	MTHFD2	0.32	DCTN1-AS1	0.24	INO80B-WBP1	0.21	ACTG2	0.13	SLC4A5	0.1	RTKN	0.08	MRPL53	0.01	INO80B	0
Breast_SE_729	TTC31	0.41	LOXL3	0.39	DCTN1	0.33	C2orf81	0.29	WBP1	0.27	WDR54	0.24	HTRA2	0.22	TLX2	0.2	INO80B-WBP1	0.17	LBX2-AS1	0.1
Breast_SE_731	HK2	0.61	TTC31	0.25	DOK1	0.15	SEMA4F	0.1	TLX2	0.08	MOGS	0.01	MIR5000	0	MRPL53	0	LBX2	0	LBX2-AS1	0
Breast_SE_732	EVA1A	0.68	LOC101927884	0.35	TLX2	0.33	POLE4	0.32	M1AP	0.27	DQX1	0.17	HTRA2	0.13	DOK1	0.13	MRPL19	0.11	HK2	0.1
Breast_SE_734	TRABD2A	0.69	TMSB10	0.63	FUNDC2P2	0.47	SH2D6	0.45	GGCX	0.4	CAPG	0.34	TGOLN2	0.32	MAT2A	0.25	RETSAT	0.23	KCMF1	0.02
Breast_SE_735	TCF7L1	0.67	LOC102724579	0.36	C2orf68	0.31	USP39	0.25	GNLY	0.19	VAMP5	0.18	ELMOD3	0.17	MAT2A	0.06	SH2D6	0.03	VAMP8	0.02
Breast_SE_736	USP39	0.44	C2orf68	0.43	SH2D6	0.36	TMEM150A	0.35	MAT2A	0.32	ELMOD3	0.26	RNF181	0.24	VAMP5	0.23	ATOH8	0.22	GNLY	0.14
Breast_SE_737	ATOH8	0.69	C2orf68	0.59	SH2D6	0.55	LOC284950	0.55	MIR6071	0.47	TGOLN2	0.45	RNF181	0.33	USP39	0.31	ELMOD3	0.3	TMEM150A	0.27
Breast_SE_738	ST3GAL5	0.63	TMEM150A	0.63	ST3GAL5-AS1	0.58	USP39	0.42	RNF181	0.41	C2orf68	0.34	IMMT	0.31	LOC284950	0.19	MAT2A	0.16	SNORD94	0.16
Breast_SE_739	ST3GAL5	0.49	REEP1	0.35	ST3GAL5-AS1	0.35	PTCD3	0.3	IMMT	0.25	SNORD94	0.21	VAMP8	0.11	VAMP5	0.06	USP39	0.03	SFTPB	0.01
Breast_SE_740	RNF103	0.75	RMND5A	0.59	REEP1	0.55	RGPD2	0.45	LOC285074	0.37	RNF103-CHMP3	0.37	CHMP3	0.34	PTCD3	0.29	CD8A	0.24	PLGLB1	0.18
Breast_SE_741	ANKRD20A8P	0.51	MAL	0.49	TEKT4	0.44	LOC442028	0.43	PROM2	0.37	FAM95A	0.34	ZNF2	0.26	ASTL	0.25	ZNF514	0.23	FAHD2CP	0.19
Breast_SE_742	PROM2	0.68	ASTL	0.32	KCNIP3	0.3	FAM95A	0.29	LINC00342	0.27	LOC100133920	0.23	ANKRD20A8P	0.22	ADRA2B	0.2	ANKRD36C	0.18	LOC442028	0.17
Breast_SE_744	DUSP2	0.77	ASTL	0.45	LINC00342	0.29	TRIM43	0.27	ANKRD36C	0.19	ADRA2B	0.14	FER1L5	0.03	CIAO1	0	TMEM127	0	FAHD2CP	0
Breast_SE_745	SNRNP200	0.44	STARD7	0.37	ASTL	0.34	CIAO1	0.32	DUSP2	0.31	LINC00342	0.28	CNNM4	0.25	ANKRD36C	0.21	KANSL3	0.21	FAHD2CP	0.18
Breast_SE_746	SNRNP200	0.44	MIR3127	0.32	ARID5A	0.26	NCAPH	0.24	KANSL3	0.21	ANKRD36C	0.18	STARD7	0.17	ADRA2B	0.15	STARD7-AS1	0.13	DUSP2	0.04
Breast_SE_747	ARID5A	0.62	MIR3127	0.62	KANSL3	0.49	NEURL3	0.43	ADRA2B	0.41	NCAPH	0.4	SNRNP200	0.37	STARD7	0.3	ASTL	0.25	STARD7-AS1	0.25
Breast_SE_748	CNNM4	0.61	SEMA4C	0.61	FAM178B	0.6	SNRNP200	0.56	CNNM3	0.49	ANKRD23	0.4	CIAO1	0.4	NCAPH	0.25	ANKRD39	0.12	NEURL3	0.1
Breast_SE_751	MGAT4A	0.72	LOC101927070	0.62	COA5	0.49	TSGA10	0.46	C2orf15	0.4	VWA3B	0.32	KIAA1211L	0.27	LYG1	0.24	AFF3	0.03	INPP4A	0
Breast_SE_753	AFF3	0.54	LONRF2	0.27	LIPT1	0.27	LOC101927070	0.26	UNC50	0.18	MRPL30	0.16	LYG2	0.15	MITD1	0.15	CHST10	0.09	TSGA10	0.04
Breast_SE_756	AFF3	0.65	C2orf15	0.42	LIPT1	0.35	LONRF2	0.26	MITD1	0.24	TSGA10	0.23	TBC1D8	0.23	MRPL30	0.18	TXNDC9	0.1	LYG2	0.05
Breast_SE_757	NPAS2	0.88	MAP4K4	0.44	LINC01104	0.43	LOC101927142	0.41	CHST10	0.31	MIR5696	0.31	RFX8	0.3	LINC01127	0.29	IL1R2	0.28	CREG2	0.27
Breast_SE_758	TBC1D8	0.77	NPAS2	0.15	LINC01104	0.14	LOC101927142	0.08	IL1R1	0.06	RNF149	0.06	CREG2	0.05	LONRF2	0.05	LINC01127	0	IL1R2	0
Breast_SE_760	RFX8	0.76	IL1R1	0.59	MAP4K4	0.54	IL18R1	0.4	IL1RL1	0.35	NPAS2	0.35	CREG2	0.23	IL1R2	0.22	RPL31	0.19	LINC01127	0.19
Breast_SE_762	MAP4K4	0.74	RFX8	0.51	IL18R1	0.39	IL1R1	0.37	RPL31	0.35	NPAS2	0.33	CREG2	0.28	IL1R2	0.27	IL18RAP	0.26	MIR5696	0.25
Breast_SE_763	IL1R1	0.73	RFX8	0.46	IL18RAP	0.43	IL18R1	0.31	LINC01127	0.21	TBC1D8	0.1	IL1RL2	0.09	MAP4K4	0.09	IL1R2	0.06	IL1RL1	0.04
Breast_SE_764	POU3F3	0.99	LINC01159	0.83	LINC01158	0.8	GPR45	0.27	MRPS9	0.23	LINC01114	0.16	LOC102724691	0.13	UXS1	0.08	NCK2	0.01	LINC01103	0
Breast_SE_765	FHL2	0.72	UXS1	0.56	C2orf49	0.54	LOC102724691	0.47	TGFBRAP1	0.45	GPR45	0.28	MRPS9	0.26	LOC285000	0.2	LINC01114	0.19	LINC01103	0
Breast_SE_766	NCK2	0.66	MRPS9	0.41	GPR45	0.41	TGFBRAP1	0.41	C2orf49	0.38	C2orf40	0.2	ST6GAL2	0.15	LINC01158	0.05	POU3F3	0.04	UXS1	0.04
Breast_SE_768	EDAR	0.84	SLC5A7	0.31	GCC2	0.3	SH3RF3	0.27	RGPD6	0.24	RANBP2	0.22	SOWAHC	0.2	SH3RF3-AS1	0.18	LIMS3	0.06	MIR4265	0
Breast_SE_769	SH3RF3	0.71	SH3RF3-AS1	0.56	LIMS3-LOC440895	0.07	RGPD8	0.04	EDAR	0	MIR4266	0	MIR4265	0	LOC100288570	0	LOC440895	0	MIR4436B1	0
Breast_SE_770	NPHP1	0.22	SOWAHC	0.2	LIMS3	0.19	MIR4267	0.1	LINC01123	0.08	RGPD5	0.07	MIR4266	0	MIR4265	0	LOC100288570	0	LOC440895	0
Breast_SE_771	SOWAHC	0.73	NPHP1	0.33	RGPD5	0.25	LIMS3	0.23	RGPD6	0.22	MIR4267	0.21	LINC00116	0.17	MALL	0.13	MIR4266	0	LOC100288570	0
Breast_SE_772	MALL	0.5	LIMS3-LOC440895	0.34	LINC00116	0.32	BUB1	0.24	RGPD8	0.23	MIR4267	0.21	NPHP1	0.14	LINC01106	0.03	ACOXL	0.03	RGPD5	0.03
Breast_SE_774	BCL2L11	0.85	MERTK	0.28	ZC3H6	0.16	ZC3H8	0.11	LINC01123	0.07	MALL	0.07	ANAPC1	0.06	TMEM87B	0.06	MIR4267	0.04	ACOXL	0.02
Breast_SE_775	BCL2L11	0.36	LINC01106	0.2	FLJ42351	0.16	MERTK	0.15	ACOXL	0.07	BUB1	0.04	ZC3H6	0	ANAPC1	0	CHCHD5	-0.1	ZC3H8	-0.1
Breast_SE_778	FBLN7	0.85	TTL	0.33	CKAP2L	0.29	ZC3H6	0.29	NT5DC4	0.25	MERTK	0.2	ZC3H8	0.11	IL36B	0.11	IL1B	0.02	TMEM87B	0.01
Breast_SE_779	CHCHD5	0.37	ZC3H8	0.21	FLJ42351	0.12	TMEM87B	0.11	IL36RN	0.05	FBLN7	0.02	IL1F10	0.02	TTL	0	SLC20A1	0	IL36A	-0.1
Breast_SE_780	SLC20A1	0.68	FLJ42351	0.64	NT5DC4	0.4	CKAP2L	0.39	TTL	0.33	IL1B	0.26	IL1A	0.25	POLR1B	0.24	IL1RN	0.18	IL36B	0.13
Breast_SE_782	POLR1B	0.5	PAX8-AS1	0.41	IL1RN	0.36	SLC20A1	0.32	FOXD4L1	0.29	PSD4	0.24	FLJ42351	0.2	CHCHD5	0.19	IL1A	0.09	IL36A	0.06
Breast_SE_783	ACTR3	0.87	SLC35F5	0.78	CBWD2	0.58	LOC101060091	0.34	PSD4	0.33	RPL23AP7	0.3	WASH2P	0.3	RABL2A	0.29	LOC100499194	0.23	MIR4782	0.22
Breast_SE_784	EN1	0.71	LOC101927709	0.37	LOC100506797	0.34	DDX18	0.22	CCDC93	0.21	TMEM185B	0.19	MARCO	0.14	EPB41L5	0.08	RALB	0.05	INSIG2	0.03
Breast_SE_786	EN1	0.92	LOC101927709	0.27	LOC100506797	0.2	INSIG2	0.13	C1QL2	0.13	DDX18	0.12	CCDC93	0.11	RALB	0.11	MARCO	0.04	TMEM185B	0.03
Breast_SE_787	MARCO	0.75	STEAP3	0.29	TMEM37	0.14	C1QL2	0.08	DBI	0.02	LOC101927709	0.01	SCTR	0	CCDC93	0	EPB41L5	0	DDX18	0
Breast_SE_788	STEAP3	0.52	DBI	0.51	INSIG2	0.31	INHBB	0.29	TMEM37	0.12	C2orf76	0.09	SCTR	0.08	C1QL2	0.08	MARCO	0.01	CFAP221	0.01
Breast_SE_791	RALB	0.47	TMEM185B	0.42	TMEM177	0.36	EPB41L5	0.32	LINC01101	0.28	PTPN4	0.21	CLASP1	0.19	STEAP3	0.19	TMEM37	0.13	DBI	0.08
Breast_SE_792	INHBB	0.81	PTPN4	0.49	LINC01101	0.42	EPB41L5	0.39	C2orf76	0.22	SCTR	0.22	DBI	0.19	RALB	0.14	RNU4ATAC	0.12	TMEM185B	0.01
Breast_SE_793	INHBB	0.65	PTPN4	0.43	TFCP2L1	0.3	LINC01101	0.29	DBI	0.29	SCTR	0.27	EPB41L5	0.21	TMEM177	0.14	CFAP221	0.09	TMEM37	0.06
Breast_SE_794	INHBB	0.56	DBI	0.28	RNU4ATAC	0.24	PTPN4	0.23	LINC01101	0.19	C2orf76	0.14	SCTR	0.12	TMEM37	0.08	TFCP2L1	0	CFAP221	0
Breast_SE_795	GLI2	0.68	STEAP3	0.24	NIFK-AS1	0.2	TMEM177	0.14	TMEM185B	0.13	CLASP1	0.11	CFAP221	0.11	RALB	0	TMEM37	0	TSN	-0.1
Breast_SE_796	TFCP2L1	0.84	CLASP1	0.35	PTPN4	0.27	STEAP3	0.2	TMEM185B	0.17	TMEM177	0.12	GLI2	0.09	EPB41L5	0.02	SCTR	0	NIFK	0
Breast_SE_799	BIN1	0.85	GYPC	0.45	UGGT1	0.17	MAP3K2	0.17	IWS1	0.16	POLR2D	0.15	GPR17	0.14	PROC	0.08	CYP27C1	0.07	LOC101927881	0.07
Breast_SE_801	GYPC	0.48	MAP3K2	0.46	IWS1	0.37	SAP130	0.37	PROC	0.37	LOC101927881	0.22	MYO7B	0.16	LIMS2	0.12	ERCC3	0.1	RAB6C-AS1	0.08
Breast_SE_802	LIMS2	0.63	GPR17	0.61	BIN1	0.49	MYO7B	0.42	POLR2D	0.41	LOC101927881	0.39	GYPC	0.34	AMMECR1L	0.3	ERCC3	0.22	IWS1	0.2
Breast_SE_803	HS6ST1	0.78	MAP3K2	0.43	SAP130	0.42	SFT2D3	0.39	AMMECR1L	0.37	IWS1	0.31	WDR33	0.25	POLR2D	0.19	PROC	0.19	LOC101927881	0.16
Breast_SE_804	RAB6C-AS1	0.78	RAB6C	0.73	CCDC115	0.59	PTPN18	0.42	SFT2D3	0.31	POTEF	0.29	TUBA3E	0.27	SAP130	0.23	HS6ST1	0.21	FAR2P1	0.21
Breast_SE_805	ARHGEF4	0.57	IMP4	0.3	POTEJ	0.29	POTEE	0.27	PLEKHB2	0.13	POTEI	0.09	WTH3DI	0.01	AMER3	0.01	FAM168B	0	CFC1	0
Breast_SE_808	GPR39	0.31	ZNF806	0.3	C2orf27B	0.27	LYPD1	0.26	TUBA3D	0.2	FAM201B	0.2	LINC01120	0.19	MIR4784	0.17	LOC150776	0.13	MZT2A	0.13
Breast_SE_809	ANKRD30BL	0.88	MIR5590	0.88	NCKAP5	0.54	MGAT5	0.46	RAB3GAP1	0.11	ACMSD	0.1	CCNT2	0.09	CCNT2-AS1	0.05	LOC101928185	0	MIR663B	0
Breast_SE_812	SPOPL	0.79	R3HDM1	0.4	UBXN4	0.39	LRP1B	0.38	MCM6	0.33	LCT	0.29	HNMT	0.19	YY1P2	0.18	MAP3K19	0.17	ZRANB3	0.13
Breast_SE_814	KYNU	0.72	HNMT	0.46	YY1P2	0.34	MBD5	0.32	LOC101928386	0.17	PABPC1P2	0.1	ARHGAP15	0.08	ORC4	0.04	SPOPL	0.04	ZEB2-AS1	0.02
Breast_SE_815	YY1P2	0.39	SPOPL	0.36	ARHGAP15	0.36	ORC4	0.26	HNMT	0.26	MBD5	0.21	KYNU	0.13	MIR7157	0	LOC101928273	0	LOC101928386	0
Breast_SE_818	KYNU	0.38	PABPC1P2	0.19	LOC101928386	0.15	ZEB2-AS1	0.14	MMADHC	0.13	LOC101929231	0.12	LOC101929282	0.09	ZEB2	0.09	ORC4	0.03	TEX41	0.02
Breast_SE_819	ZEB2-AS1	0.76	ZEB2	0.55	TEX41	0.5	LOC101929282	0.24	RND3	0.14	KYNU	0.12	ACVR2A	0.1	LOC101928386	0.08	PABPC1P2	0.03	LOC101929231	0
Breast_SE_820	LYPD6B	0.89	LYPD6	0.67	MMADHC	0.57	KIF5C	0.57	ORC4	0.41	LOC101929231	0.39	EPC2	0.39	NEB	0.37	MBD5	0.34	RIF1	0.22
Breast_SE_822	NMI	0.41	RND3	0.31	MMADHC	0.28	LYPD6B	0.27	RIF1	0.27	LYPD6	0.25	CACNB4	0.22	ARL5A	0.21	NEB	0.17	STAM2	0.15
Breast_SE_823	RND3	0.65	RIF1	0.56	NMI	0.43	RBM43	0.28	CACNB4	0.26	LOC101929231	0.24	FMNL2	0.23	MMADHC	0.18	ARL5A	0.17	TNFAIP6	0.12
Breast_SE_824	ARL6IP6	0.35	RND3	0.31	FMNL2	0.31	NMI	0.27	GALNT13	0.24	LOC101929282	0.2	RIF1	0.14	TNFAIP6	0.12	LOC101929319	0.12	RBM43	0.07
Breast_SE_825	NR4A2	0.58	FAM133DP	0.41	RPRM	0.29	PKP4	0.28	GPD2	0.24	DAPL1	0.17	WDSUB1	0.16	MIR6888	0	CYTIP	0	KCNJ3	0
Breast_SE_826	GPD2	0.7	FAM133DP	0.51	MIR6888	0.38	BAZ2B	0.3	PKP4	0.3	NR4A2	0.28	GALNT13	0.28	TANC1	0.27	CCDC148	0.19	UPP2	0.16
Breast_SE_829	BAZ2B	0.35	LY75-CD302	0.27	CD302	0.25	NR4A2	0.24	TANC1	0.19	MIR6888	0.19	ACVR1	0.17	FAM133DP	0.14	ACVR1C	0.11	UPP2	0.07
Breast_SE_831	PKP4	0.52	BAZ2B	0.48	DAPL1	0.41	ITGB6	0.34	LY75	0.33	WDSUB1	0.31	UPP2	0.29	MIR6888	0.25	TANC1	0.25	CCDC148	0.21
Breast_SE_833	TANC1	0.77	MIR6888	0.73	ITGB6	0.4	LOC643072	0.31	PKP4	0.25	BAZ2B	0.21	LY75	0.18	PLA2R1	0.14	MIR4785	0.13	RBMS1	0.11
Breast_SE_834	TANC1	0.7	MIR6888	0.54	PLA2R1	0.41	ITGB6	0.28	PKP4	0.28	MIR4785	0.27	RBMS1	0.2	LOC643072	0.18	ACVR1	0.17	CYTIP	0.17
Breast_SE_837	RBMS1	0.57	MIR6888	0.46	TANC1	0.44	MIR4785	0.38	PSMD14	0.36	PLA2R1	0.31	PKP4	0.29	TANK	0.29	ITGB6	0.26	TBR1	0.25
Breast_SE_839	TANK	0.5	SLC4A10	0.42	IFIH1	0.36	LY75	0.33	TBR1	0.27	ITGB6	0.23	GCA	0.23	MIR4785	0.15	GCG	0.09	PSMD14	0.05
Breast_SE_840	TANK	0.46	TBR1	0.25	FAP	0.23	SLC4A10	0.22	MIR4785	0.2	KCNH7	0.16	IFIH1	0.12	DPP4	0.09	GCG	0.08	PLA2R1	0.06
Breast_SE_841	DPP4	0.53	IFIH1	0.5	TANK	0.49	LOC101929532	0.47	FAP	0.43	PLA2R1	0.42	RBMS1	0.35	ITGB6	0.24	PSMD14	0.2	AHCTF1P1	0.16
Breast_SE_844	GRB14	0.58	TTC21B-AS1	0.36	LOC101929633	0.26	SCN1A	0.24	SLC38A11	0.18	COBLL1	0.11	LOC102724058	0.09	FIGN	0.06	KCNH7	0.05	SNORA70F	0.03
Breast_SE_845	COBLL1	0.84	LOC101929633	0.61	SNORA70F	0.6	SLC38A11	0.56	GRB14	0.55	SCN7A	0.5	LOC100506124	0.44	LOC102724058	0.34	SCN1A	0.29	FIGN	0.24
Breast_SE_846	GALNT3	0.9	GRB14	0.34	LOC102724058	0.3	SCN1A	0.16	COBLL1	0.04	LOC101929633	0.04	TTC21B-AS1	0.02	SCN3A	0	SLC38A11	0	XIRP2	0
Breast_SE_847	CERS6	0.82	CERS6-AS1	0.81	LRP2	0.46	NOSTRIN	0.44	BBS5	0.23	ABCB11	0.2	KLHL23	0.2	PHOSPHO2-KLHL23	0.18	STK39	0.04	KLHL41	0.04
Breast_SE_851	DLX1	0.79	DLX2	0.65	METAP1D	0.37	PDK1	0.24	SP5	0.17	CYBRD1	0.15	SLC25A12	0.13	HAT1	0.08	DYNC1I2	0.07	LINC01124	0.01
Breast_SE_852	ITGA6	0.64	CYBRD1	0.53	METTL8	0.47	DYNC1I2	0.38	RAPGEF4-AS1	0.31	GAD1	0.31	SLC25A12	0.31	PDK1	0.22	METAP1D	0.21	DCAF17	0.15
Breast_SE_853	ITGA6	0.74	RAPGEF4-AS1	0.5	METTL8	0.45	SLC25A12	0.35	CDCA7	0.25	RAPGEF4	0.2	METAP1D	0.2	CYBRD1	0.16	PDK1	0.15	ERICH2	0.15
Breast_SE_855	RAPGEF4	0.42	METAP1D	0.28	LINC01305	0.22	DCAF17	0.12	CDCA7	0.11	OLA1	0.1	SP3	0.09	SCRN3	0.06	ITGA6	0.01	DLX1	0
Breast_SE_856	SP9	0.38	HAT1	0.33	DYNC1I2	0.31	CYBRD1	0.21	DLX1	0.17	ITGA6	0.16	DLX2	0.12	OLA1	0.1	CDCA7	0.08	SLC25A12	0.06
Breast_SE_858	SP3	0.51	RAPGEF4-AS1	0.4	CIR1	0.4	LINC01305	0.33	WIPF1	0.29	RNU6-7	0.28	CHN1	0.27	CHRNA1	0.26	ATF2	0.25	RNU6-2	0.14
Breast_SE_860	WIPF1	0.88	CHN1	0.64	MIR933	0.58	RNU6-7	0.42	RNU6-9	0.23	SP3	0.22	ATP5G3	0.22	ATF2	0.18	OLA1	0.15	CIR1	0.14
Breast_SE_861	HAGLR	0.88	HOXD1	0.75	HOXD3	0.69	HAGLROS	0.62	HOXD8	0.58	HOXD11	0.54	HOXD10	0.51	MIR10B	0.51	HOXD13	0.48	HOXD9	0.45
Breast_SE_862	NFE2L2	0.18	MTX2	0.14	LOC100130691	0.11	MIR3128	0.1	HAGLR	0.08	HAGLROS	0.07	HOXD3	0.07	HOXD1	0.06	MIR1246	0	MIR6512	0
Breast_SE_868	FRZB	0.87	PDE1A	0.32	ZNF804A	0.23	UBE2E3	0.09	SSFA2	0.05	NCKAP1	0.02	PPP1R1C	0.01	FSIP2	0	MIR4437	0	MIR548AE1	0
Breast_SE_870	ITGAV	0.35	GULP1	0.32	FAM171B	0.28	CALCRL	0.25	DIRC1	0.23	MIR561	0.15	ZNF804A	0.12	LINC01473	0.11	ZC3H15	0.07	COL3A1	0.05
Breast_SE_873	TFPI	0.71	FAM171B	0.5	MIR561	0.38	GULP1	0.35	ITGAV	0.31	COL5A2	0.29	CALCRL	0.25	COL3A1	0.22	MIR3606	0.21	DIRC1	0.16
Breast_SE_874	GULP1	0.72	COL3A1	0.31	MIR3606	0.26	ZSWIM2	0.26	SLC40A1	0.23	CALCRL	0.23	DIRC1	0.2	OSGEPL1-AS1	0.15	COL5A2	0.12	ANKAR	0.12
Breast_SE_875	COL3A1	0.88	MIR3606	0.87	DIRC1	0.74	COL5A2	0.7	GULP1	0.42	OSGEPL1	0.38	OSGEPL1-AS1	0.34	ORMDL1	0.26	ASNSD1	0.19	PMS1	0.04
Breast_SE_877	SLC40A1	0.91	OSGEPL1-AS1	0.3	MFSD6	0.14	HIBCH	0.13	OSGEPL1	0.09	MSTN	0	MIR1245B	0	MIR1245A	0	MIR3129	-0.1	DIRC1	-0.1
Breast_SE_878	C2orf88	0.91	NAB1	0.31	HIBCH	0.27	OSGEPL1	0.26	INPP1	0.24	COL5A2	0.12	OSGEPL1-AS1	0.09	SLC40A1	0.01	GLS	0	MSTN	0
Breast_SE_879	NAB1	0.62	PMS1	0.56	ANKAR	0.45	GLS	0.43	INPP1	0.41	ORMDL1	0.32	C2orf88	0.31	NABP1	0.25	MSTN	0.24	WDR75	0.2
Breast_SE_880	GLS	0.85	PMS1	0.38	INPP1	0.35	ORMDL1	0.32	NAB1	0.31	NABP1	0.3	ASNSD1	0.22	ANKAR	0.16	STAT1	0.11	TMEFF2	0.05
Breast_SE_881	STAT1	0.35	MSTN	0.12	STAT4	0.12	OSGEPL1	0.04	TMEFF2	0.04	ORMDL1	0	OSGEPL1-AS1	0	ANKAR	0	MFSD6	0	SLC40A1	0
Breast_SE_882	MYO1B	0.6	STAT4	0.29	OSGEPL1	0.28	ORMDL1	0.24	NABP1	0.24	OSGEPL1-AS1	0.22	STAT1	0.21	ANKAR	0.21	PCGEM1	0.16	ASNSD1	0.16
Breast_SE_884	NABP1	0.63	ANKAR	0.57	ORMDL1	0.53	MSTN	0.43	TMEFF2	0.37	PMS1	0.3	ASNSD1	0.29	OSGEPL1	0.27	GLS	0.26	MYO1B	0.24
Breast_SE_885	TMEFF2	0.62	NABP1	0.51	ANKAR	0.45	OSGEPL1	0.41	ORMDL1	0.4	MSTN	0.33	PMS1	0.28	C2orf88	0.23	GLS	0.15	NAB1	0.14
Breast_SE_886	ANKRD44	0.46	STK17B	0.44	C2orf66	0.32	LOC101927482	0.31	HECW2	0.25	CCDC150	0.2	RFTN2	0.16	ANKRD44-IT1	0.1	LOC100130452	0	SLC39A10	-0.1
Breast_SE_888	ANKRD44	0.38	ANKRD44-IT1	0.26	BOLL	0.24	C2orf66	0.16	PLCL1	0.14	LOC101927596	0.09	HECW2	0.06	RFTN2	0.05	PGAP1	0.05	CCDC150	0.04
Breast_SE_889	ANKRD44	0.26	BOLL	0.23	LOC101927596	0.13	LOC100130452	0.08	C2orf66	0.05	CCDC150	0.04	PLCL1	0.03	RFTN2	0.01	HECW2	0	SF3B1	0
Breast_SE_890	SATB2	0.88	SPATS2L	0.44	AOX1	0.42	SATB2-AS1	0.37	PLCL1	0.17	ORC2	0.12	LOC101927795	0.07	PPIL3	0.06	TYW5	0.03	CFLAR-AS1	0.01
Breast_SE_891	SPATS2L	0.69	SATB2	0.37	CASP10	0.24	SATB2-AS1	0.19	CFLAR-AS1	0.18	AOX1	0.13	CFLAR	0.07	CLK1	0.06	NIF3L1	0.05	LOC101927795	0
Breast_SE_893	STRADB	0.38	PPIL3	0.33	KCTD18	0.19	TRAK2	0.19	NIF3L1	0.18	CFLAR-AS1	0.15	CASP8	0.15	AOX1	0.07	C2orf69	0.06	BZW1	0.04
Breast_SE_895	KCTD18	0.18	AOX1	0.13	ALS2CR12	0.12	CFLAR-AS1	0.11	CFLAR	0.08	STRADB	0.08	ALS2	0.05	PPIL3	0.04	CASP10	0.04	TRAK2	0.03
Breast_SE_897	FZD7	0.6	BMPR2	0.4	ALS2CR12	0.31	TRAK2	0.27	ICA1L	0.25	SUMO1	0.24	CASP10	0.23	CFLAR-AS1	0.2	TMEM237	0.12	CDK15	0.1
Breast_SE_898	FZD7	0.48	STRADB	0.13	CARF	0.13	ICA1L	0.12	SUMO1	0.12	TRAK2	0.11	NBEAL1	0.1	NOP58	0.09	WDR12	0.08	MPP4	0.06
Breast_SE_899	SUMO1	0.45	CYP20A1	0.42	FAM117B	0.39	FZD7	0.37	LOC729224	0.31	BMPR2	0.3	STRADB	0.3	ABI2	0.29	CARF	0.23	SNORD11B	0.15
Breast_SE_900	CYP20A1	0.44	SUMO1	0.43	FZD7	0.39	FAM117B	0.37	BMPR2	0.31	STRADB	0.29	LOC729224	0.29	ABI2	0.29	CARF	0.23	SNORD11B	0.15
Breast_SE_902	CARF	0.56	FAM117B	0.4	NBEAL1	0.39	LOC729224	0.31	PARD3B	0.26	RAPH1	0.22	SUMO1	0.08	ABI2	0	BMPR2	0	SNORD70	0
Breast_SE_905	NRP2	0.68	GPR1	0.43	KLF7	0.39	MIR2355	0.3	SNORA41	0.28	EEF1B2	0.26	SNORD51	0.2	ADAM23	0.16	GPR1-AS	0.01	MIR3130-1	0
Breast_SE_908	KLF7	0.47	CPO	0.27	LOC101927865	0.18	ADAM23	0.14	DYTN	0.13	MIR7845	0.07	PLEKHM3	0.05	CREB1	0.01	MIR1302-4	0	MIR3130-1	0
Breast_SE_909	LOC101927865	0.55	KLF7	0.49	ADAM23	0.23	CCNYL1	0.12	MIR4775	0.1	DYTN	0.07	FASTKD2	0.06	CPO	0.03	MIR2355	0.02	MIR1302-4	0
Breast_SE_912	LOC101927865	0.53	CRYGC	0.42	CRYGB	0.3	KLF7	0.24	CCNYL1	0.13	FZD5	0.13	MIR4775	0.12	CPO	0.06	C2orf80	0.03	CREB1	0
Breast_SE_913	FZD5	0.85	MIR2355	0.53	PLEKHM3	0.47	METTL21A	0.37	CCNYL1	0.32	MIR4775	0.26	PTH2R	0.15	CREB1	0.15	CRYGC	0.06	PIKFYVE	0.01
Breast_SE_915	ERBB4	0.68	LANCL1-AS1	0.33	LOC100130451	0.19	LOC101928020	0.18	RPE	0.12	MAP2	0.09	IKZF2	0.07	CPS1-IT1	0	MIR548F2	0	MIR4776-1	0
Breast_SE_916	LOC100130451	0.71	ERBB4	0.49	LANCL1-AS1	0.3	SPAG16	0.25	LOC101928020	0.19	VWC2L	0.12	MYL1	0.05	MIR548F2	0	MIR4776-1	0	MIR4776-2	0
Breast_SE_917	ERBB4	0.88	LOC101928020	0.66	ABCA12	0.41	LANCL1-AS1	0.41	LOC101928103	0.39	BARD1	0.39	ACADL	0.22	IKZF2	0.09	SPAG16	0.08	LOC100130451	0.07
Breast_SE_918	BARD1	0.54	LOC101928103	0.53	ERBB4	0.35	IKZF2	0.34	LOC100130451	0.34	ABCA12	0.31	LANCL1-AS1	0.31	VWC2L	0.13	ATIC	0.09	MIR4776-1	0
Breast_SE_919	LOC100130451	0.61	SPAG16	0.49	CPS1	0.45	ATIC	0.23	IKZF2	0.15	LOC101928103	0.09	MIR4776-1	0	MIR4776-2	0	MIR4438	0	MIR548F2	0
Breast_SE_922	FN1	0.75	LOC102724849	0.48	SMARCAL1	0.34	TNP1	0.25	RPL37A	0.22	LINC00607	0.18	VWC2L	0.18	ATIC	0.09	VWC2L-IT1	0	LINC01280	0
Breast_SE_923	FN1	0.54	LOC102724849	0.51	LINC00607	0.47	TMEM169	0.36	TNP1	0.33	SMARCAL1	0.18	VWC2L	0.07	LINC01280	0	VWC2L-IT1	0	PECR	0
Breast_SE_924	MREG	0.59	ABCA12	0.54	BARD1	0.42	TMEM169	0.32	IGFBP5	0.3	LOC101928103	0.29	DIRC3	0.28	ATIC	0.25	IGFBP2	0.24	LINC00607	0.23
Breast_SE_926	IGFBP5	0.65	IGFBP2	0.61	DIRC3	0.47	TNS1	0.31	CXCR2P1	0.23	RUFY4	0.18	CXCR2	0.15	MIR6809	0.15	LINC00607	0.04	LOC102724849	0
Breast_SE_927	IGFBP5	0.79	DIRC3	0.59	IGFBP2	0.34	AAMP	0.33	TNS1	0.3	MIR6809	0.25	PNKD	0.11	GPBAR1	0.07	LINC01280	0	CXCR1	0
Breast_SE_928	DIRC3	0.41	SLC11A1	0.25	PNKD	0.22	MIR6809	0.2	TNS1	0.15	CATIP-AS1	0.15	CXCR2P1	0.14	MIR26B	0.13	CATIP	0.08	CXCR1	0.07
Breast_SE_929	TNS1	0.82	MIR6809	0.59	DIRC3	0.29	AAMP	0.16	CATIP-AS1	0.1	ARPC2	0.06	CATIP	0.02	RUFY4	0	CXCR1	0	CTDSP1	0
Breast_SE_930	CATIP	0.67	PNKD	0.62	VIL1	0.62	CATIP-AS1	0.6	SLC11A1	0.42	CATIP-AS2	0.41	AAMP	0.3	GPBAR1	0.3	CXCR1	0.29	CXCR2P1	0.22
Breast_SE_931	TTLL4	0.38	FEV	0.32	WNT6	0.32	CYP27A1	0.3	PRKAG3	0.23	STK36	0.16	CRYBA2	0.15	MIR26B	0.13	VIL1	0.07	PLCD4	0.06
Breast_SE_932	WNT10A	0.65	WNT6	0.55	CRYBA2	0.49	TTLL4	0.49	CYP27A1	0.42	PRKAG3	0.31	IHH	0.24	NHEJ1	0.19	FEV	0.17	BCS1L	0.15
Breast_SE_933	LOC100129175	0.81	PRKAG3	0.58	CRYBA2	0.45	ANKZF1	0.33	ZFAND2B	0.32	CNPPD1	0.22	WNT6	0.21	ABCB6	0.15	SLC23A3	0.15	FEV	0.14
Breast_SE_936	LOC100129175	0.23	CNPPD1	0.21	RESP18	0.15	GLB1L	0.06	ABCB6	0.02	IHH	0.01	STK16	0	MIR375	0	SLC23A3	0	ZFAND2B	0
Breast_SE_937	IHH	0.38	ATG9A	0.35	GLB1L	0.35	ABCB6	0.33	DNAJB2	0.25	RESP18	0.18	MIR153-1	0.15	TUBA4A	0.12	STK16	0.11	DES	0.09
Breast_SE_938	SPEG	0.63	DES	0.58	ATG9A	0.45	GMPPA	0.44	ABCB6	0.43	LOC100996693	0.41	PTPRN	0.33	TMEM198	0.3	MIR153-1	0.25	CHPF	0.22
Breast_SE_940	SPEG	0.66	SLC4A3	0.63	OBSL1	0.58	INHA	0.46	TUBA4B	0.41	CHPF	0.37	TUBA4A	0.34	MIR3132	0.33	STK11IP	0.3	MIR153-1	0.24
Breast_SE_941	LOC100996693	0.45	SPEG	0.36	CHPF	0.33	DES	0.27	DNPEP	0.27	OBSL1	0.26	PTPRN	0.25	MIR153-1	0.24	SLC4A3	0.23	ASIC4	0.14
Breast_SE_945	KCNE4	0.72	DOCK10	0.66	SCG2	0.53	WDFY1	0.52	SERPINE2	0.48	NYAP2	0.42	EPHA4	0.26	FARSB	0.09	MRPL44	0.04	MIR4439	0
Breast_SE_946	AP1S3	0.69	LOC646736	0.24	CUL3	0.24	FAM124B	0.23	LOC440934	0.18	PAX3	0.15	MOGAT1	0.14	CCDC140	0.14	SGPP2	0.12	NYAP2	0.09
Breast_SE_947	WDFY1	0.78	KCNE4	0.48	SCG2	0.48	DOCK10	0.45	FARSB	0.36	SERPINE2	0.34	NYAP2	0.33	EPHA4	0.28	MRPL44	0.18	CUL3	0.12
Breast_SE_950	IRS1	0.52	NYAP2	0.33	LOC646736	0.3	RHBDD1	0.23	TM4SF20	0.19	DOCK10	0.11	MIR5702	0.1	C2orf83	0.07	LOC654841	0	CUL3	0
Breast_SE_953	IRS1	0.87	DOCK10	0.46	RHBDD1	0.41	NYAP2	0.27	DAW1	0.15	C2orf83	0.12	CCL20	0.08	LOC646736	0.06	MIR5702	0	SLC19A3	0
Breast_SE_954	TM4SF20	0.47	AGFG1	0.43	PID1	0.34	MIR5703	0.33	LOC646736	0.32	LOC654841	0.29	MFF	0.25	SLC19A3	0.24	COL4A3	0.1	MIR5702	0.06
Breast_SE_955	DAW1	0.55	SLC19A3	0.49	PID1	0.29	IRS1	0.26	DNER	0.26	RHBDD1	0.25	MIR5703	0.21	LOC646736	0.19	CCL20	0.13	TRIP12	0.13
Breast_SE_957	CAB39	0.6	SP140L	0.36	SP100	0.35	SP110	0.3	SP140	0.27	MIR4777	0.27	HTR2B	0.23	NCL	0.2	SPATA3	0.18	GPR55	0.18
Breast_SE_958	ITM2C	0.61	LOC151484	0.46	B3GNT7	0.39	PSMD1	0.32	SP140	0.31	MIR4777	0.28	GPR55	0.25	SP140L	0.25	NCL	0.24	SNORD20	0.12
Breast_SE_962	B3GNT7	0.51	MIR1244-2	0.43	GPR55	0.25	LINC00471	0.22	MIR4777	0.2	SPATA3-AS1	0.19	C2orf72	0.15	PTMA	0.13	PDE6D	0.08	MIR1244-3	0.02
Breast_SE_963	PDE6D	0.36	SNORD20	0.28	PTMA	0.27	LINC00471	0.19	NPPC	0.18	MIR1244-3	0.17	MIR4777	0.1	SNORA75	0.08	C2orf72	0.08	ARMC9	0.03
Breast_SE_964	PTMA	0.71	B3GNT7	0.46	PDE6D	0.37	MIR1244-2	0.36	COPS7B	0.29	SNORD20	0.27	NMUR1	0.23	NPPC	0.23	LINC00471	0.17	NCL	0.16
Breast_SE_965	ALPPL2	0.37	EFHD1	0.36	ALPP	0.33	ECEL1P2	0.31	PRSS56	0.25	NPPC	0.23	ALPI	0.23	DIS3L2	0.15	EIF4E2	0.15	ECEL1	0.11
Breast_SE_967	EFHD1	0.86	C2orf82	0.59	TIGD1	0.53	CHRND	0.43	CHRNG	0.4	LOC101928881	0.35	ECEL1	0.33	MIR5001	0.33	NEU2	0.21	ALPPL2	0.15
Breast_SE_969	SAG	0.49	DGKD	0.42	SCARNA5	0.34	LOC101928881	0.33	C2orf82	0.31	USP40	0.29	SCARNA6	0.27	ATG16L1	0.15	KCNJ13	0.09	UGT1A3	0.04
Breast_SE_970	DGKD	0.8	SCARNA5	0.3	LOC101928881	0.23	ATG16L1	0.21	SAG	0.15	SCARNA6	0.06	USP40	0	UGT1A6	0	UGT1A8	0	UGT1A1	0
Breast_SE_971	UGT1A6	0.55	UGT1A8	0.55	UGT1A7	0.55	UGT1A3	0.54	UGT1A9	0.54	UGT1A5	0.54	UGT1A4	0.54	UGT1A10	0.54	DGKD	0.44	MROH2A	0.31
Breast_SE_972	HJURP	0.41	TRPM8	0.23	DGKD	0.2	MROH2A	0.1	MSL3P1	0.09	SPP2	0	UGT1A8	0	UGT1A6	0	UGT1A7	0	UGT1A9	0
Breast_SE_974	ARL4C	0.71	HJURP	0.59	SH3BP4	0.26	SPP2	0.21	TRPM8	0.19	DGKD	0.14	USP40	0.1	MSL3P1	0	LOC100286922	0	DNAJB3	-0.1
Breast_SE_975	ARL4C	0.66	SH3BP4	0.25	HJURP	0.22	TRPM8	0.16	MSL3P1	0.1	UGT1A8	0.07	LOC100286922	0.07	UGT1A10	0.07	UGT1A6	0.06	UGT1A9	0.06
Breast_SE_976	SH3BP4	0.77	TRPM8	0.31	HJURP	0.29	MROH2A	0.2	AGAP1-IT1	0.17	ARL4C	0.08	ASB18	0.07	SPP2	0.02	AGAP1	0	MSL3P1	0
Breast_SE_977	AGAP1	0.32	MSL3P1	0.28	UGT1A3	0.19	UGT1A4	0.18	UGT1A1	0.18	AGAP1-IT1	0.18	MROH2A	0.17	DNAJB3	0.06	LOC100286922	0.01	TRPM8	0
Breast_SE_978	GBX2	0.86	ASB18	0.7	ARL4C	0.56	LRRFIP1	0.43	IQCA1	0.36	ACKR3	0.28	RBM44	0.19	RAMP1	0.14	UBE2F-SCLY	0.12	AGAP1	0.07
Breast_SE_979	ACKR3	0.5	COPS8	0.38	RAMP1	0.36	LOC93463	0.34	MIR6811	0.3	MLPH	0.29	UBE2F	0.26	COL6A3	0.24	UBE2F-SCLY	0.21	AGAP1-IT1	0.13
Breast_SE_980	COPS8	0.54	RAMP1	0.42	COL6A3	0.24	UBE2F-SCLY	0.21	ACKR3	0.2	SCLY	0.2	LOC93463	0.19	UBE2F	0.18	MIR6811	0.13	MLPH	0.05
Breast_SE_981	MLPH	0.47	MIR6811	0.41	COPS8	0.4	COL6A3	0.36	RAMP1	0.32	LOC93463	0.32	ACKR3	0.29	PRLH	0.26	UBE2F	0.19	UBE2F-SCLY	0.15
Breast_SE_982	MLPH	0.57	MIR6811	0.53	LRRFIP1	0.53	PRLH	0.35	RBM44	0.33	SCLY	0.32	KLHL30	0.24	LOC151174	0.15	UBE2F-SCLY	0.15	COPS8	0.1
Breast_SE_983	RAMP1	0.74	ASB1	0.71	UBE2F-SCLY	0.5	SCLY	0.45	UBE2F	0.41	ESPNL	0.39	ILKAP	0.38	COL6A3	0.32	LOC151174	0.13	KLHL30	0
Breast_SE_984	PER2	0.64	RAB17	0.54	PRLH	0.41	TRAF3IP1	0.34	HES6	0.27	LINC01107	0.09	MIR6811	0.06	KLHL30	0.05	LRRFIP1	0	LOC643387	0
Breast_SE_985	ASB1	0.67	SCLY	0.48	RAMP1	0.41	UBE2F-SCLY	0.37	LRRFIP1	0.27	ILKAP	0.25	TWIST2	0.2	UBE2F	0.19	RBM44	0.12	LOC151174	0.08
Breast_SE_987	TWIST2	0.76	ASB1	0.53	ILKAP	0.5	UBE2F	0.47	ESPNL	0.21	SCLY	0.18	HDAC4	0.04	LOC101928111	0	KLHL30	0	MIR2467	0
Breast_SE_988	HDAC4	0.38	MIR4786	0.32	LINC01107	0.32	TRAF3IP1	0.28	LOC101928111	0.23	TWIST2	0.22	HES6	0.2	MIR4441	0.17	PER2	0.09	NDUFA10	0.07
Breast_SE_989	HDAC4	0.42	LOC101928111	0.34	TWIST2	0.27	MIR4441	0.26	ASB1	0.24	TRAF3IP1	0.19	MIR4786	0.17	OR6B3	0.13	NDUFA10	0	MGC16025	0
Breast_SE_990	GPC1	0.64	LOC285191	0.41	AQP12B	0.27	CAPN10	0.12	LOC150935	0.09	NDUFA10	0.07	AGXT	0.06	MIR4786	0.03	AQP12A	0	RNPEPL1	0
Breast_SE_991	GPC1	0.53	CAPN10-AS1	0.32	LOC285191	0.28	CAPN10	0.28	OTOS	0.2	AGXT	0.2	PP14571	0.18	OR6B2	0.16	MIR4786	0.15	MIR149	0.13
Breast_SE_992	ANKMY1	0.41	CAPN10	0.38	CAPN10-AS1	0.37	RNPEPL1	0.37	LOC285191	0.33	DUSP28	0.32	AGXT	0.28	C2orf54	0.21	OTOS	0.18	GPC1	0.16
Breast_SE_993	SNED1	0.64	C2orf54	0.47	MTERF4	0.46	GPR35	0.42	DUSP28	0.42	LOC285191	0.4	PPP1R7	0.37	LOC200772	0.3	ANKMY1	0.22	ANO7	0.13
Breast_SE_994	ANO7	0.71	PPP1R7	0.21	LOC285191	0.13	SNED1	0.13	KIF1A	0.12	MTERF4	0.1	FARP2	0.1	DTYMK	0.09	MIR3133	0.05	PASK	0.03
Breast_SE_995	THAP4	0.51	STK25	0.51	FARP2	0.5	DTYMK	0.45	PPP1R7	0.45	HDLBP	0.44	ING5	0.42	MTERF4	0.42	LOC200772	0.38	D2HGDH	0.37
Breast_SE_996	BOK	0.7	NEU4	0.31	GAL3ST2	0.28	PDCD1	0.23	BOK-AS1	0.21	LOC285095	0.18	PASK	0.16	DTYMK	0.1	STK25	0.09	LINC01237	0.06
Breast_SE_997	NEU4	0.65	PASK	0.42	LOC285095	0.41	PDCD1	0.39	PPP1R7	0.39	D2HGDH	0.39	FARP2	0.37	LINC01237	0.31	THAP4	0.26	STK25	0.26
Breast_SE_998	LOC285095	0.71	LINC01237	0.69	GAL3ST2	0.68	NEU4	0.61	PPP1R7	0.41	D2HGDH	0.38	PASK	0.31	ING5	0.19	PDCD1	0.19	RTP5	0.17
Breast_SE_999	LINC01237	0.47	GAL3ST2	0.34	NEU4	0.31	PPP1R7	0.3	PASK	0.3	LOC285095	0.29	PDCD1	0.26	BOK-AS1	0.26	FARP2	0.25	MIR3133	0.21
Breast_SE_1000	EGOT	0.28	BHLHE40-AS1	0.21	ITPR1-AS1	0.19	GRM7-AS3	0.19	ITPR1	0.17	GRM7	0.13	SUMF1	0.07	BHLHE40	0.04	LOC100130207	0	CRBN	0
Breast_SE_1001	GRM7-AS3	0.34	ITPR1	0.27	EDEM1	0.16	EGOT	0.1	GRM7	0.08	SUMF1	0.08	BHLHE40-AS1	0.05	ITPR1-AS1	0.01	ARL8B	0	MIR4790	0
Breast_SE_1002	ITPR1-AS1	0.43	EDEM1	0.43	BHLHE40-AS1	0.35	BHLHE40	0.34	ITPR1	0.33	ARL8B	0.3	GRM7-AS3	0.28	SUMF1	0.17	IL5RA	0.16	EGOT	0.13
Breast_SE_1003	EDEM1	0.49	ITPR1	0.35	TRNT1	0.25	LOC100130207	0.22	ARL8B	0.19	IL5RA	0.19	EGOT	0.18	LOC101927394	0.1	GRM7-AS3	0.09	SUMF1	0.08
Breast_SE_1004	LMCD1	0.88	LMCD1-AS1	0.73	LINC00312	0.69	SETD5	0.52	THUMPD3-AS1	0.51	LOC101927394	0.48	CAV3	0.48	THUMPD3	0.44	MTMR14	0.43	LHFPL4	0.39
Breast_SE_1005	SSUH2	0.64	LHFPL4	0.61	LOC101927394	0.35	LINC00312	0.33	RAD18	0.29	LMCD1	0.26	OXTR	0.25	LMCD1-AS1	0.19	CAV3	0.18	CPNE9	0.15
Breast_SE_1006	CAV3	0.66	OXTR	0.54	LMCD1-AS1	0.52	LINC00312	0.5	LMCD1	0.49	LOC101927394	0.44	RAD18	0.38	TADA3	0.31	SETD5	0.23	MTMR14	0.21
Breast_SE_1007	OXTR	0.65	TADA3	0.44	RAD18	0.43	LMCD1	0.42	LMCD1-AS1	0.42	LINC00312	0.34	LHFPL4	0.29	OGG1	0.27	CAV3	0.26	THUMPD3	0.25
Breast_SE_1008	SRGAP3	0.79	SRGAP3-AS3	0.35	THUMPD3-AS1	0.35	ARPC4-TTLL3	0.11	ARPC4	0.08	OGG1	0.06	LMCD1	0.05	THUMPD3	0.05	TADA3	0.05	MTMR14	0.01
Breast_SE_1009	THUMPD3-AS1	0.42	TTLL3	0.4	TADA3	0.37	SETD5	0.36	SRGAP3	0.26	ARPC4-TTLL3	0.19	BRPF1	0.15	ARPC4	0.12	THUMPD3	0.12	IL17RE	0.11
Breast_SE_1010	TADA3	0.71	BRPF1	0.67	ARPC4-TTLL3	0.58	SETD5	0.57	THUMPD3	0.56	ARPC4	0.52	THUMPD3-AS1	0.49	MTMR14	0.44	TTLL3	0.43	OGG1	0.36
Breast_SE_1011	TADA3	0.72	ARPC4-TTLL3	0.69	ARPC4	0.66	BRPF1	0.64	PRRT3	0.53	EMC3	0.51	TTLL3	0.5	OGG1	0.47	CAMK1	0.46	MTMR14	0.44
Breast_SE_1012	LOC401052	0.57	PRRT3	0.56	TADA3	0.51	TTLL3	0.5	CIDECP	0.39	BRPF1	0.35	ARPC4-TTLL3	0.27	EMC3-AS1	0.27	EMC3	0.24	ARPC4	0.22
Breast_SE_1013	IRAK2	0.55	SEC13	0.5	ATP2B2	0.5	CIDECP	0.49	EMC3	0.42	TATDN2	0.28	BRK1	0.25	MIR378B	0.24	VHL	0.21	GHRLOS	0.21
Breast_SE_1014	ATP2B2	0.86	MIR885	0.59	ATP2B2-IT2	0.56	LINC00606	0.56	MIR378B	0.5	LOC401052	0.49	SLC6A1	0.36	IRAK2	0.35	BRK1	0.29	CIDECP	0.28
Breast_SE_1015	HRH1	0.58	ATP2B2	0.57	MIR885	0.53	IRAK2	0.46	SEC13	0.4	SLC6A1	0.36	ATG7	0.27	ATP2B2-IT2	0.22	LINC00606	0.22	TATDN2	0.2
Breast_SE_1016	HRH1	0.67	IRAK2	0.43	ATP2B2	0.38	SEC13	0.36	SLC6A1	0.21	LINC00606	0.18	ATP2B2-IT2	0.18	TAMM41	0.17	MIR378B	0.16	ATG7	0.15
Breast_SE_1017	SEC13	0.36	TAMM41	0.33	GHRL	0.33	SLC6A1	0.26	ATP2B2	0.24	MKRN2	0.2	VGLL4	0.19	ATG7	0.19	LINC00606	0.15	ATP2B2-IT2	0.15
Breast_SE_1018	MKRN2OS	0.59	SLC6A11	0.53	VGLL4	0.41	SLC6A1-AS1	0.16	TMEM40	0.14	TIMP4	0.09	SYN2	0.05	TAMM41	0.02	SNORA7A	0	RAF1	0
Breast_SE_1019	PPARG	0.55	HRH1	0.52	RPL32	0.26	SLC6A1-AS1	0.19	MKRN2	0.15	ATG7	0.12	RAF1	0.1	TAMM41	0.07	TSEN2	0.06	TIMP4	0.03
Breast_SE_1020	PPARG	0.82	HRH1	0.57	RPL32	0.38	TIMP4	0.35	MKRN2	0.32	SYN2	0.21	ATG7	0.2	TSEN2	0.06	SNORA7A	0.06	RAF1	0.04
Breast_SE_1021	TAMM41	0.31	NUP210	0.27	RAF1	0.24	PPARG	0.23	HDAC11	0.11	MKRN2OS	0.11	VGLL4	0.11	IQSEC1	0.1	FBLN2	0.06	MKRN2	0.05
Breast_SE_1022	RAF1	0.63	TAMM41	0.58	IQSEC1	0.52	MKRN2	0.41	HDAC11	0.38	NUP210	0.37	CAND2	0.35	FBLN2	0.35	VGLL4	0.34	HDAC11-AS1	0.29
Breast_SE_1023	TMEM40	0.76	HDAC11	0.33	TAMM41	0.32	MKRN2OS	0.27	HDAC11-AS1	0.27	NUP210	0.26	FBLN2	0.21	IQSEC1	0.19	WNT7A	0.17	RAF1	0.14
Breast_SE_1024	IQSEC1	0.71	NUP210	0.43	RAF1	0.39	PPARG	0.38	CAND2	0.27	SYN2	0.21	MKRN2	0.18	LINC00620	0.16	MKRN2OS	0.13	HDAC11	0.12
Breast_SE_1025	HDAC11	0.81	FBLN2	0.6	HDAC11-AS1	0.52	RAF1	0.46	IQSEC1	0.43	LSM3	0.38	MKRN2	0.35	NUP210	0.33	CAND2	0.3	FGD5P1	0.25
Breast_SE_1027	WNT7A	0.88	SLC6A6	0.33	TMEM43	0.22	SNORA7A	0.1	XPC	0.09	TPRXL	0.07	RPL32	0.04	GRIP2	0.01	FGD5P1	0	C3orf20	-0.1
Breast_SE_1028	XPC	0.48	HDAC11	0.4	TMEM43	0.3	NR2C2	0.29	HDAC11-AS1	0.27	FBLN2	0.26	FGD5-AS1	0.25	NUP210	0.24	CHCHD4	0.21	CCDC174	0.2
Breast_SE_1029	FGD5	0.64	LSM3	0.49	FGD5-AS1	0.49	LINC01267	0.46	HDAC11	0.41	NR2C2	0.38	C3orf20	0.38	CCDC174	0.31	TPRXL	0.21	MRPS25	0.21
Breast_SE_1030	SLC6A6	0.72	TMEM43	0.49	GRIP2	0.49	LSM3	0.27	CCDC174	0.27	NR2C2	0.25	MRPS25	0.23	C3orf20	0.22	FGD5-AS1	0.21	LINC01267	0.17
Breast_SE_1031	FGD5	0.91	LINC01267	0.66	COL6A4P1	0.44	LSM3	0.33	MRPS25	0.31	EAF1	0.3	FGD5-AS1	0.27	COLQ	0.23	METTL6	0.19	CHCHD4	0.17
Breast_SE_1037	SH3BP5-AS1	0.66	SH3BP5	0.65	EAF1	0.51	COL6A4P1	0.44	NR2C2	0.41	MIR563	0.38	FGD5-AS1	0.36	MRPS25	0.34	COLQ	0.33	CCDC174	0.29
Breast_SE_1038	ANKRD28	0.69	BTD	0.59	METTL6	0.44	RFTN1	0.35	GALNT15	0.35	COL6A4P1	0.31	HACL1	0.23	MIR563	0.18	NR2C2	0.18	DPH3	0.18
Breast_SE_1039	ANKRD28	0.46	RFTN1	0.45	BTD	0.41	METTL6	0.25	DPH3	0.15	MIR563	0.11	HACL1	0.07	NR2C2	0.05	MIR4270	0	LINC00690	0
Breast_SE_1040	RFTN1	0.53	ANKRD28	0.49	GALNT15	0.46	BTD	0.3	METTL6	0.21	PLCL2	0.2	MIR563	0.13	DPH3	0.1	MIR4270	0	HACL1	0
Breast_SE_1041	SATB1	0.76	SATB1-AS1	0.56	PLCL2	0.48	OXNAD1	0.44	RFTN1	0.36	KAT2B	0.34	DPH3	0.3	DAZL	0.22	PP2D1	0.19	GALNT15	0.16
Breast_SE_1046	THRB	0.73	THRB-AS1	0.6	OXSM	0.31	TOP2B	0.14	LINC00691	0.12	ZNF385D-AS2	0.11	LOC101927854	0.07	NKIRAS1	0	MIR4792	0	MIR4442	0
Breast_SE_1047	RARB	0.82	NEK10	0.58	NKIRAS1	0.36	NGLY1	0.34	UBE2E1	0.31	UBE2E2	0.3	NR1D2	0.27	OXSM	0.21	SLC4A7	0.19	TOP2B	0.17
Breast_SE_1048	UBE2E1	0.54	NEK10	0.49	NKIRAS1	0.48	RARB	0.47	RPL15	0.43	NR1D2	0.4	NGLY1	0.36	SLC4A7	0.33	OXSM	0.27	TOP2B	0.23
Breast_SE_1051	RBMS3	0.72	SLC4A7	0.59	RBMS3-AS3	0.57	TGFBR2	0.49	RBMS3-AS1	0.35	LRRC3B	0.31	NEK10	0.31	AZI2	0.25	CMC1	0.21	ZCWPW2	0.14
Breast_SE_1055	TGFBR2	0.67	CMTM7	0.59	OSBPL10	0.48	RBMS3	0.47	RBMS3-AS1	0.43	STT3B	0.36	RBMS3-AS3	0.34	GADL1	0.27	MIR548AY	0.26	AZI2	0.17
Breast_SE_1057	TGFBR2	0.8	OSBPL10	0.59	RBMS3	0.48	CMTM7	0.46	RBMS3-AS3	0.44	STT3B	0.39	RBMS3-AS1	0.34	AZI2	0.33	CMTM6	0.33	GADL1	0.22
Breast_SE_1058	STT3B	0.38	GLB1	0.34	DYNC1LI1	0.33	CNOT10	0.33	GPD1L	0.31	CCR4	0.22	GADL1	0.19	TRIM71	0.19	MIR548AY	0.17	RBMS3-AS1	0.15
Breast_SE_1059	STT3B	0.38	GLB1	0.34	DYNC1LI1	0.33	CNOT10	0.33	GPD1L	0.31	CCR4	0.22	GADL1	0.19	TRIM71	0.19	MIR548AY	0.17	RBMS3-AS1	0.15
Breast_SE_1061	GPD1L	0.85	CMTM8	0.55	UBP1	0.41	CNOT10	0.27	ZNF860	0.21	DYNC1LI1	0.2	CCR4	0.18	GLB1	0.16	TRIM71	0.07	GADL1	0.07
Breast_SE_1062	CMTM7	0.79	FBXL2	0.52	CLASP2	0.4	CMTM6	0.38	OSBPL10	0.38	DYNC1LI1	0.34	TMPPE	0.33	CRTAP	0.32	ZNF860	0.31	STT3B	0.2
Breast_SE_1063	TRIM71	0.81	MIR548AY	0.81	CMTM8	0.38	CNOT10	0.32	CLASP2	0.3	UBP1	0.22	DYNC1LI1	0.18	TMPPE	0.15	CCR4	0.14	GLB1	0.13
Breast_SE_1064	GPD1L	0.59	CMTM8	0.56	CNOT10	0.39	PDCD6IP	0.32	UBP1	0.31	CLASP2	0.24	DYNC1LI1	0.23	FBXL2	0.21	GLB1	0.17	TMPPE	0.1
Breast_SE_1065	STAC	0.75	OXSR1	0.48	VILL	0.43	PLCD1	0.42	DLEC1	0.33	MYD88	0.28	ACAA1	0.23	LRRFIP2	0.22	MIR26A1	0.2	C3orf35	0.19
Breast_SE_1066	PLCD1	0.49	ACAA1	0.46	LRRFIP2	0.46	STAC	0.35	C3orf35	0.34	DLEC1	0.33	GOLGA4	0.33	MYD88	0.27	SLC22A13	0.24	OXSR1	0.2
Breast_SE_1068	CTDSPL	0.81	ITGA9-AS1	0.53	XYLB	0.31	VILL	0.25	PLCD1	0.17	ACAA1	0.14	MIR26A1	0.13	EXOG	0.12	SLC22A14	0.1	SLC22A13	0.1
Breast_SE_1069	ACAA1	0.53	CTDSPL	0.53	PLCD1	0.46	ITGA9-AS1	0.45	ITGA9	0.43	DLEC1	0.43	VILL	0.38	MYD88	0.29	MIR26A1	0.23	ACVR2B	0.23
Breast_SE_1070	ACAA1	0.55	ACVR2B-AS1	0.4	PLCD1	0.37	MYD88	0.3	C3orf35	0.28	DLEC1	0.19	SCN5A	0.16	ACVR2B	0.16	SCN10A	0.15	OXSR1	0.15
Breast_SE_1072	ACVR2B-AS1	0.52	SNORA6	0.27	WDR48	0.24	ACVR2B	0.21	MOBP	0.15	SNORA62	0.14	XIRP1	0.12	SCN5A	0.11	SCN11A	0.06	MIR6822	0.06
Breast_SE_1073	TTC21A	0.63	MYRIP	0.57	ACVR2B-AS1	0.44	CX3CR1	0.43	GORASP1	0.32	CCR8	0.31	MOBP	0.31	MIR6822	0.3	CSRNP1	0.28	SCN11A	0.14
Breast_SE_1074	TRAK1	0.71	SEC22C	0.49	VIPR1-AS1	0.38	ULK4	0.35	VIPR1	0.28	CTNNB1	0.25	LYZL4	0.2	NKTR	0.18	HIGD1A	0.16	LOC101928323	0.13
Breast_SE_1075	VIPR1-AS1	0.68	VIPR1	0.67	LYZL4	0.53	ACKR2	0.34	CYP8B1	0.34	NKTR	0.31	LOC101928323	0.3	CCDC13-AS1	0.26	TRAK1	0.17	CCDC13	0.15
Breast_SE_1076	ZBTB47	0.68	SS18L2	0.45	SEC22C	0.36	HIGD1A	0.35	NKTR	0.34	HHATL	0.32	CCDC13-AS1	0.32	VIPR1-AS1	0.29	VIPR1	0.29	LOC101928323	0.27
Breast_SE_1077	ZBTB47	0.82	SEC22C	0.67	HIGD1A	0.41	CCDC13	0.31	NKTR	0.25	LOC101928323	0.22	SS18L2	0.16	KRBOX1	0.14	KRBOX1-AS1	0.14	CCK	0.12
Breast_SE_1078	VIPR1	0.54	LYZL4	0.52	CCDC13	0.52	VIPR1-AS1	0.48	FAM198A	0.43	ACKR2	0.42	CYP8B1	0.4	NKTR	0.35	POMGNT2	0.23	ZBTB47	0.18
Breast_SE_1080	MIR138-1	0.52	ANO10	0.38	KRBOX1	0.28	TOPAZ1	0.28	ZKSCAN7	0.26	ABHD5	0.24	KRBOX1-AS1	0.24	ZNF197	0.2	ZNF197-AS1	0.2	ZNF445	0.11
Breast_SE_1081	ANO10	0.79	MIR138-1	0.41	ZNF197	0.26	KIAA1143	0.25	TOPAZ1	0.18	KIF15	0.18	ZNF501	0.17	SNRK	0.16	SNRK-AS1	0.14	TCAIM	0.14
Breast_SE_1082	MIR138-1	0.69	TMEM42	0.54	MIR564	0.5	ZKSCAN7	0.49	ZNF501	0.32	ANO10	0.3	ZNF502	0.27	KIF15	0.06	ZNF35	0.01	TOPAZ1	0
Breast_SE_1083	TMEM158	0.79	TMEM42	0.55	ZDHHC3	0.48	MIR564	0.44	EXOSC7	0.37	CDCP1	0.36	LARS2	0.33	ZNF197-AS1	0.3	CLEC3B	0.28	ZNF501	0.24
Breast_SE_1084	MIR564	0.52	LIMD1	0.43	LIMD1-AS1	0.35	TMEM42	0.33	TMEM158	0.28	LZTFL1	0.25	CCR9	0.22	CCR1	0.21	SACM1L	0.13	CLEC3B	0.11
Breast_SE_1085	FYCO1	0.47	CCR5	0.42	CCR2	0.4	CCR3	0.37	LIMD1-AS1	0.32	LOC102724297	0.3	CCR9	0.3	SLC6A20	0.28	LZTFL1	0.24	CCRL2	0.23
Breast_SE_1086	CCR1	0.51	LRRC2-AS1	0.3	CXCR6	0.26	XCR1	0.24	CCR2	0.24	LOC102724297	0.2	RTP3	0.2	FYCO1	0.19	LRRC2	0.19	CCR3	0.18
Breast_SE_1087	LOC102724297	0.82	CCRL2	0.79	CCR2	0.53	CCR5	0.52	FYCO1	0.28	CCR3	0.19	PRSS50	0.14	CXCR6	0.09	PRSS46	0.03	LTF	0.03
Breast_SE_1088	LRRC2-AS1	0.77	RTP3	0.67	LRRC2	0.61	TMIE	0.43	LOC102724297	0.31	CCRL2	0.27	PTH1R	0.17	CCDC12	0.16	CCR1	0.12	CCR5	0.09
Breast_SE_1090	NBEAL2	0.66	NRADDP	0.6	PRSS46	0.23	ALS2CL	0.15	KIF9	0.15	PRSS42	0.13	PRSS45	0.08	PRSS50	0.06	KIF9-AS1	0.06	KLHL18	0.05
Breast_SE_1092	CSPG5	0.44	SMARCC1	0.43	SCAP	0.38	PTPN23	0.37	SETD2	0.3	DHX30	0.29	MAP4	0.26	PRSS46	0.25	NBEAL2	0.24	MIR1226	0.15
Breast_SE_1093	SMARCC1	0.44	CSPG5	0.4	MAP4	0.3	PTPN23	0.24	ELP6	0.23	NME6	0.22	DHX30	0.22	MIR1226	0.2	SCAP	0.05	FBXW12	0.04
Breast_SE_1094	SPINK8	0.72	TMA7	0.54	PFKFB4	0.31	FBXW12	0.31	CAMP	0.3	NME6	0.27	MIR6823	0.23	PLXNB1	0.23	UQCRC1	0.21	ATRIP	0.18
Breast_SE_1095	PLXNB1	0.54	ATRIP	0.49	CCDC51	0.44	TMEM89	0.42	PFKFB4	0.39	TMA7	0.38	CAMP	0.37	MIR6823	0.35	UQCRC1	0.34	TREX1	0.33
Breast_SE_1096	UQCRC1	0.65	UCN2	0.6	PFKFB4	0.54	TMA7	0.51	ATRIP	0.5	CCDC51	0.49	MIR711	0.47	SHISA5	0.45	COL7A1	0.43	NCKIPSD	0.41
Breast_SE_1098	P4HTM	0.67	DALRD3	0.66	ARIH2	0.64	USP19	0.59	CCDC71	0.37	ARIH2OS	0.37	LAMB2	0.36	QARS	0.36	PRKAR2A	0.35	MIR6890	0.34
Breast_SE_1099	LAMB2	0.6	ARIH2	0.58	USP19	0.54	ARIH2OS	0.54	QRICH1	0.48	P4HTM	0.45	MIR6890	0.43	QARS	0.42	CCDC71	0.34	KLHDC8B	0.32
Breast_SE_1100	LAMB2	0.6	DAG1	0.53	AMT	0.48	USP19	0.48	NICN1	0.47	MIR6890	0.46	BSN	0.45	USP4	0.41	QARS	0.38	RHOA	0.28
Breast_SE_1101	NICN1	0.6	DAG1	0.56	TRAIP	0.55	AMIGO3	0.51	RNF123	0.45	IP6K1	0.42	BSN	0.4	TCTA	0.33	AMT	0.27	CDHR4	0.26
Breast_SE_1102	RBM5	0.58	CDHR4	0.55	RBM5-AS1	0.5	UBA7	0.48	MIR5193	0.48	AMIGO3	0.4	IP6K1	0.4	DAG1	0.38	TRAIP	0.38	RBM6	0.33
Breast_SE_1103	RNF123	0.56	MST1R	0.55	MST1	0.49	AMIGO3	0.49	SEMA3F	0.37	RBM5-AS1	0.27	RBM5	0.25	MON1A	0.17	CDHR4	0.14	APEH	0.12
Breast_SE_1104	TUSC2	0.65	HYAL2	0.58	NAT6	0.52	HYAL3	0.51	RBM5	0.37	RBM6	0.35	SEMA3B-AS1	0.35	MON1A	0.34	SEMA3F	0.34	LSMEM2	0.32
Breast_SE_1105	CACNA2D2	0.62	CISH	0.61	ZMYND10	0.46	NPRL2	0.41	SEMA3B-AS1	0.39	TUSC2	0.25	HYAL3	0.22	CYB561D2	0.18	HYAL2	0.13	HEMK1	0.11
Breast_SE_1106	CISH	0.73	CACNA2D2	0.48	DOCK3	0.26	ZMYND10	0.24	MAPKAPK3	0.2	TUSC2	0.19	HYAL3	0.16	HEMK1	0.11	HYAL1	0.09	MIR4787	0.03
Breast_SE_1107	RBM15B	0.67	GPR62	0.57	PCBP4	0.52	RAD54L2	0.46	ABHD14A	0.43	ABHD14B	0.39	TEX264	0.38	MANF	0.3	PARP3	0.26	GRM2	0.24
Breast_SE_1108	TEX264	0.61	ABHD14B	0.59	ABHD14A	0.54	PCBP4	0.51	ABHD14A-ACY1	0.5	ACY1	0.46	GPR62	0.43	PARP3	0.42	RBM15B	0.37	RAD54L2	0.32
Breast_SE_1109	PCBP4	0.62	POC1A	0.61	ABHD14A	0.58	ABHD14B	0.49	GPR62	0.46	ABHD14A-ACY1	0.43	PARP3	0.41	ACY1	0.39	DUSP7	0.32	RRP9	0.29
Breast_SE_1110	PBRM1	0.52	SNORD19B	0.47	NISCH	0.44	GNL3	0.39	NEK4	0.38	MUSTN1	0.38	GLT8D1	0.37	ITIH4-AS1	0.33	SNORD19	0.31	TMEM110-MUSTN1	0.31
Breast_SE_1111	PRKCD	0.75	CACNA1D	0.71	SFMBT1	0.45	ITIH4	0.29	ITIH1	0.27	NEK4	0.24	MIR8064	0.24	SNORD19	0.16	MUSTN1	0.12	SNORD19B	0.07
Breast_SE_1112	TKT	0.72	DCP1A	0.6	SPCS1	0.41	GLT8D1	0.4	NEK4	0.36	SNORD69	0.35	SNORD19B	0.29	TMEM110	0.23	RFT1	0.21	ITIH3	0.2
Breast_SE_1113	WNT5A	0.64	CACNA2D3	0.44	DCP1A	0.42	LRTM1	0.38	ACTR8	0.32	RFT1	0.27	FAM208A	0.22	TKT	0.2	CCDC66	0.12	CACNA2D3-AS1	0.07
Breast_SE_1114	WNT5A	0.63	SPATA12	0.45	CACNA2D3	0.39	TKT	0.3	DCP1A	0.26	LRTM1	0.24	ACTR8	0.16	FAM208A	0.1	CACNA2D3-AS1	0.08	CCDC66	0.03
Breast_SE_1115	WNT5A	0.88	CACNA2D3	0.55	CACNA2D3-AS1	0.47	SPATA12	0.4	ACTR8	0.21	ERC2-IT1	0.17	ARHGEF3-AS1	0.17	ESRG	0.15	LRTM1	0.14	ERC2	0.05
Breast_SE_1116	ARHGEF3	0.7	HESX1	0.42	DNASE1L3	0.3	APPL1	0.27	IL17RD	0.26	DENND6A	0.24	ASB14	0.23	ERC2	0.18	ERC2-IT1	0.18	SPATA12	0.08
Breast_SE_1117	IL17RD	0.54	ARHGEF3	0.45	DNAH12	0.31	HESX1	0.27	DENND6A	0.23	ABHD6	0.21	FAM208A	0.2	APPL1	0.17	ASB14	0.13	SPATA12	0.1
Breast_SE_1118	DENND6A	0.69	CCDC66	0.57	FAM208A	0.47	PDHB	0.45	RPP14	0.42	PXK	0.41	APPL1	0.36	ASB14	0.35	IL17RD	0.34	ARF4	0.3
Breast_SE_1119	DENND6A	0.46	SLMAP	0.43	FLNB	0.4	ABHD6	0.39	ASB14	0.38	PDE12	0.38	RPP14	0.36	IL17RD	0.35	ARF4	0.3	PXK	0.29
Breast_SE_1120	DENND6A	0.52	PXK	0.43	FLNB	0.42	KCTD6	0.38	ASB14	0.35	APPL1	0.35	PDE12	0.33	FAM107A	0.33	ABHD6	0.3	ACOX2	0.3
Breast_SE_1121	PXK	0.68	PDHB	0.56	RPP14	0.55	KCTD6	0.54	DENND6A	0.54	ARF4	0.37	ABHD6	0.32	PDE12	0.28	FAM107A	0.21	ACOX2	0.14
Breast_SE_1122	KCTD6	0.64	PDHB	0.45	ACOX2	0.37	PDE12	0.31	PXK	0.27	DNAH12	0.24	DENND6A	0.21	RPP14	0.14	FAM3D	0.12	ASB14	0.05
Breast_SE_1123	FAM107A	0.49	PXK	0.35	KCTD6	0.31	FAM3D	0.27	PDHB	0.27	PDE12	0.22	SLMAP	0.18	RPP14	0.17	DENND6A	0.15	DNAH12	0.14
Breast_SE_1127	PTPRG	0.83	PTPRG-AS1	0.58	PRICKLE2-AS3	0.41	THOC7-AS1	0.25	THOC7	0.19	PRICKLE2	0.17	PSMD6	0.14	PRICKLE2-AS1	0.13	LINC00698	0.06	ATXN7	0.02
Breast_SE_1130	PTPRG-AS1	0.47	PTPRG	0.46	CADPS	0.2	PRICKLE2-AS3	0.2	LINC00698	0.04	THOC7-AS1	0.04	PSMD6	0.03	FEZF2	0.02	THOC7	0	PRICKLE2	0
Breast_SE_1131	THOC7	0.72	PSMD6	0.7	LINC00994	0.64	ATXN7	0.58	C3orf49	0.56	PRICKLE2-AS2	0.45	ADAMTS9-AS2	0.3	THOC7-AS1	0.24	PSMD6-AS2	0.21	PRICKLE2-AS1	0.17
Breast_SE_1132	THOC7	0.73	PSMD6	0.72	LINC00994	0.64	ATXN7	0.59	C3orf49	0.58	PRICKLE2-AS2	0.46	ADAMTS9-AS2	0.29	THOC7-AS1	0.26	PSMD6-AS2	0.22	PRICKLE2-AS1	0.18
Breast_SE_1133	THOC7	0.73	PSMD6	0.72	LINC00994	0.65	ATXN7	0.59	C3orf49	0.58	PRICKLE2-AS2	0.46	ADAMTS9-AS2	0.3	THOC7-AS1	0.26	PSMD6-AS2	0.22	PRICKLE2-AS1	0.18
Breast_SE_1134	THOC7	0.73	PSMD6	0.72	LINC00994	0.65	ATXN7	0.59	C3orf49	0.58	PRICKLE2-AS2	0.47	ADAMTS9-AS2	0.3	THOC7-AS1	0.26	PSMD6-AS2	0.22	PRICKLE2-AS1	0.18
Breast_SE_1135	THOC7	0.73	PSMD6	0.72	LINC00994	0.65	ATXN7	0.59	C3orf49	0.58	PRICKLE2-AS2	0.46	ADAMTS9-AS2	0.3	THOC7-AS1	0.26	PSMD6-AS2	0.22	PRICKLE2-AS1	0.18
Breast_SE_1143	PRICKLE2	0.43	PRICKLE2-AS1	0.4	PRICKLE2-AS3	0.39	SYNPR-AS1	0.28	SNTN	0.2	SYNPR	0.16	MAGI1	0.16	ADAMTS9-AS2	0.06	PSMD6-AS2	0	PRICKLE2-AS2	0
Breast_SE_1144	MAGI1	0.31	ATXN7	0.31	PRICKLE2-AS1	0.21	MAGI1-IT1	0.18	THOC7-AS1	0.16	PRICKLE2	0.16	ADAMTS9	0.12	ADAMTS9-AS1	0.07	PRICKLE2-AS2	0.04	SYNPR	0.03
Breast_SE_1147	MAGI1	0.89	ATXN7	0.61	MAGI1-IT1	0.53	SLC25A26	0.49	PSMD6-AS2	0.47	LRIG1	0.45	SUCLG2	0.39	PSMD6	0.24	ADAMTS9-AS1	0.19	LINC00994	0.19
Breast_SE_1148	MAGI1	0.85	SLC25A26	0.61	MAGI1-IT1	0.48	LRIG1	0.48	SUCLG2	0.45	PSMD6-AS2	0.43	PSMD6	0.32	ADAMTS9-AS2	0.28	ADAMTS9	0.26	MAGI1-AS1	0.21
Breast_SE_1149	MAGI1	0.85	SLC25A26	0.62	MAGI1-IT1	0.49	LRIG1	0.47	SUCLG2	0.45	PSMD6-AS2	0.41	PSMD6	0.31	ADAMTS9-AS2	0.29	ADAMTS9	0.26	FAM19A1	0.22
Breast_SE_1150	LRIG1	0.68	MAGI1-IT1	0.45	MAGI1	0.39	FAM19A4	0.32	ADAMTS9	0.26	ADAMTS9-AS1	0.26	ADAMTS9-AS2	0.23	SLC25A26	0.23	PRICKLE2-AS2	0.1	LINC00994	0.06
Breast_SE_1151	SUCLG2-AS1	0.71	SUCLG2	0.41	FAM19A1	0.35	ADAMTS9-AS2	0.34	MAGI1-AS1	0.26	UBA3	0.2	SLC25A26	0.17	EOGT	0.14	TMF1	0.12	ARL6IP5	0.11
Breast_SE_1153	UBA3	0.61	ARL6IP5	0.55	SUCLG2	0.51	TMF1	0.47	MITF	0.45	LRIG1	0.34	GPR27	0.22	FRMD4B	0.15	PROK2	0.14	MIR1284	0.1
Breast_SE_1154	SUCLG2	0.41	LRIG1	0.34	ARL6IP5	0.3	GPR27	0.24	UBA3	0.22	MIR1284	0.14	EIF4E3	0.11	FRMD4B	0.11	SUCLG2-AS1	0.07	MITF	0.02
Breast_SE_1158	FOXP1	0.52	LINC00870	0.47	EOGT	0.28	GPR27	0.17	EIF4E3	0.15	GXYLT2	0.14	PROK2	0.06	ARL6IP5	0	MIR3136	0	TMF1	0
Breast_SE_1159	FOXP1	0.52	LINC00870	0.44	MITF	0.17	TMF1	0.15	MIR3136	0.15	EIF4E3	0.14	EOGT	0.11	RYBP	0.09	MIR1284	0.07	GPR27	0.02
Breast_SE_1160	EBLN2	0.55	LINC00870	0.43	FOXP1	0.4	FRMD4B	0.33	GPR27	0.22	MIR1284	0.2	EIF4E3	0.17	MITF	0.05	RYBP	0.02	LMOD3	0
Breast_SE_1161	FOXP1	0.69	RYBP	0.37	PDZRN3-AS1	0.34	UBA3	0.32	PDZRN3	0.31	LOC101927296	0.3	EIF4E3	0.29	PPP4R2	0.27	MIR1284	0.26	GPR27	0.25
Breast_SE_1162	LOC101927296	0.54	LINC00870	0.46	RYBP	0.42	MIR1284	0.32	EIF4E3	0.23	CNTN3	0.16	GPR27	0.13	FRMD4B	0.11	MIR4444-2	0.09	EBLN2	0.08
Breast_SE_1163	GPR27	0.57	RYBP	0.52	EIF4E3	0.43	LOC101927296	0.41	MIR1284	0.31	LINC00870	0.26	EBLN2	0.26	PPP4R2	0.23	MIR4444-2	0.05	FOXP1	0.02
Breast_SE_1167	GBE1	0.51	LINC00960	0.39	LINC00506	0.36	ROBO1	0.35	ZNF717	0.2	HTR1F	0.19	MIR4795	0.14	LINC00971	0.12	FRG2C	0.12	CHMP2B	0.12
Breast_SE_1168	STX19	0.37	CHMP2B	0.33	C3orf38	0.26	LINC00971	0.24	NSUN3	0.21	POU1F1	0.12	CGGBP1	0.11	ZNF654	0.09	MIR4795	0.04	MIR5688	0
Breast_SE_1171	GPR15	0.58	CLDND1	0.55	CPOX	0.54	COL8A1	0.32	ST3GAL6-AS1	0.31	ST3GAL6	0.25	ARL6	0.18	CRYBG3	0.17	OR5K1	0	OR5K3	0
Breast_SE_1172	ST3GAL6	0.88	ST3GAL6-AS1	0.83	COL8A1	0.68	CLDND1	0.47	CPOX	0.46	DCBLD2	0.37	GPR15	0.34	OR5K1	0.1	OR5K2	0.1	CRYBG3	0.08
Breast_SE_1173	DCBLD2	0.82	HP09053	0.47	COL8A1	0.45	CMSS1	0.41	GPR15	0.33	ST3GAL6	0.3	CLDND1	0.26	ST3GAL6-AS1	0.24	CPOX	0.23	OR5K2	0.05
Breast_SE_1174	DCBLD2	0.69	COL8A1	0.49	CLDND1	0.45	GPR15	0.42	CPOX	0.36	CMSS1	0.31	HP09053	0.29	FILIP1L	0.27	ST3GAL6-AS1	0.25	ST3GAL6	0.23
Breast_SE_1175	COL8A1	0.87	ST3GAL6	0.56	ST3GAL6-AS1	0.56	ABI3BP	0.47	DCBLD2	0.45	GPR15	0.41	HP09053	0.39	CLDND1	0.31	MIR3921	0.28	CPOX	0.28
Breast_SE_1177	DCBLD2	0.41	GPR15	0.38	CMSS1	0.36	IMPG2	0.36	TBC1D23	0.34	HP09053	0.33	CLDND1	0.3	CPOX	0.26	MIR3921	0.23	TMEM45A	0.16
Breast_SE_1178	TMEM45A	0.72	LNP1	0.49	SENP7	0.36	IMPG2	0.26	TBC1D23	0.25	MIR3921	0.22	TFG	0.19	COL8A1	0.14	ZBTB11-AS1	0.07	CMSS1	0.04
Breast_SE_1179	SENP7	0.44	IMPG2	0.32	TBC1D23	0.15	NXPE3	0.12	ZBTB11-AS1	0.04	PCNP	0	CEP97	0	NFKBIZ	0	TMEM45A	0	ABI3BP	0
Breast_SE_1180	NFKBIZ	0.62	LOC101929411	0.3	ZBTB11-AS1	0.17	TBC1D23	0.16	IMPG2	0.15	CEP97	0.13	TFG	0.08	SENP7	0.07	PCNP	0.04	LNP1	0.03
Breast_SE_1181	NFKBIZ	0.47	LOC101929411	0.25	LNP1	0.2	SENP7	0.2	ZPLD1	0.19	TMEM45A	0.19	ZBTB11-AS1	0.19	IMPG2	0.15	CEP97	0.11	NXPE3	0.09
Breast_SE_1182	NFKBIZ	0.39	LOC101929411	0.38	ZPLD1	0.31	LNP1	0.3	ZBTB11-AS1	0.16	TMEM45A	0.13	TFG	0.11	SENP7	0.06	NIT2	0	MIR548AB	0
Breast_SE_1183	NFKBIZ	0.46	ZBTB11-AS1	0.45	LOC101929411	0.42	ZPLD1	0.39	LNP1	0.34	IMPG2	0.32	TFG	0.3	ZBTB11	0.21	SENP7	0.2	PDCL3P4	0.12
Breast_SE_1184	ALCAM	0.78	RETNLB	0.22	MYH15	0.21	DZIP3	0.21	HHLA2	0.2	LINC00882	0.2	LINC00636	0.16	LOC101929579	0.11	CCDC54	0.06	TRAT1	9.97
Breast_SE_1187	LINC00882	0.57	LOC101929579	0.41	CCDC54	0.38	MYH15	0.36	IFT57	0.26	CBLB	0.25	DZIP3	0.2	ALCAM	0.19	BBX	0.15	LINC00636	0.07
Breast_SE_1189	LINC00636	0.45	DZIP3	0.42	CD47	0.36	RETNLB	0.29	LINC00635	0.17	MYH15	0.11	LINC01205	0.07	MORC1	0.04	LINC00488	0	HHLA2	0
Breast_SE_1192	CCDC80	0.49	PHLDB2	0.46	SLC35A5	0.42	LINC01279	0.37	TAGLN3	0.26	PLCXD2-AS1	0.21	ATG3	0.07	CD200R1	0.06	ABHD10	0.05	ZBED2	0.04
Breast_SE_1193	CCDC80	0.36	PHLDB2	0.34	LINC01279	0.29	ABHD10	0.09	TAGLN3	0.04	TMPRSS7	0.02	SLC35A5	0.02	CD200	0	PLCXD2-AS1	0	ATG3	0
Breast_SE_1194	CD200	0.8	SLC9C1	0.21	C3orf52	0.2	SLC35A5	0.16	GCSAM	0.15	LINC01279	0.07	CD200R1	0.07	BTLA	0.05	TMPRSS7	0.05	GTPBP8	0.04
Breast_SE_1195	CCDC80	0.84	LINC01279	0.68	SLC35A5	0.27	GTPBP8	0.24	TAGLN3	0.04	ATG3	0.02	CD200R1	0.01	MIR8076	0	C3orf52	0	ABHD10	0
Breast_SE_1196	BOC	0.68	CFAP44	0.64	CFAP44-AS1	0.49	GRAMD1C	0.46	ZDHHC23	0.43	MIR8076	0.42	CD200R1	0.37	CD200	0.33	ATP6V1A	0.29	SIDT1	0.28
Breast_SE_1197	BOC	0.84	CD200	0.53	CFAP44	0.49	CD200R1	0.36	BTLA	0.31	CFAP44-AS1	0.26	MIR8076	0.23	ZDHHC23	0.18	SLC35A5	0.18	LINC01279	0.17
Breast_SE_1198	SIDT1	0.93	SPICE1	0.72	ZDHHC23	0.66	GRAMD1C	0.61	CFAP44-AS1	0.5	CFAP44	0.47	CD200R1L	0.43	ATP6V1A	0.42	NAA50	0.34	MIR4446	0.27
Breast_SE_1200	BOC	0.64	ZBTB20-AS1	0.62	MIR568	0.6	ZBTB20	0.6	ZBTB20-AS4	0.45	CFAP44	0.41	GAP43	0.39	NAA50	0.31	CFAP44-AS1	0.23	SPICE1	0.19
Breast_SE_1203	ZBTB20	0.44	LSAMP	0.36	ZBTB20-AS1	0.34	LSAMP-AS1	0.34	ZNF80	0.23	ZBTB20-AS4	0.12	TIGIT	0.11	GAP43	0.08	TUSC7	0	MIR4796	0
Breast_SE_1205	ARHGAP31	0.84	ARHGAP31-AS1	0.65	ADPRH	0.48	TMEM39A	0.4	POGLUT1	0.29	POPDC2	0.28	TIMMDC1	0.28	PLA1A	0.22	C3orf30	0.16	B4GALT4-AS1	0.16
Breast_SE_1207	MAATS1	0.31	COX17	0.16	POPDC2	0.15	HGD	0.14	TIMMDC1	0.12	GTF2E1	0.09	GSK3B	0.07	CD80	0.05	ADPRH	0	NDUFB4	0
Breast_SE_1208	FSTL1	0.76	MIR198	0.74	ADPRH	0.32	GPR156	0.32	TIMMDC1	0.24	POPDC2	0.24	LRRC58	0.23	CD80	0.21	POGLUT1	0.18	RABL3	0.06
Breast_SE_1210	PARP15	0.59	CD86	0.39	ILDR1	0.33	EAF2	0.27	DTX3L	0.18	IQCB1	0.17	SLC15A2	0.16	CSTA	0.14	KPNA1	0.06	PARP9	0.06
Breast_SE_1214	PDIA5	0.44	MIR7110	0.3	SEMA5B	0.25	FAM162A	0.21	LOC102723582	0.16	DIRC2	0.11	MYLK	0.11	PARP9	0.1	MYLK-AS1	0.09	MYLK-AS2	0.06
Breast_SE_1216	CCDC14	0.64	MYLK	0.59	MYLK-AS1	0.49	ROPN1	0.34	DIRC2	0.17	PARP15	0.13	UMPS	0.12	ADCY5	0.06	MIR5002	0	MIR6083	0
Breast_SE_1217	ITGB5	0.62	SLC12A8	0.43	ZNF148	0.39	KALRN	0.3	SNX4	0.25	HEG1	0.24	OSBPL11	0.22	MUC13	0.16	LOC101927056	0.15	UMPS	0.15
Breast_SE_1218	HEG1	0.7	ITGB5	0.43	SLC12A8	0.38	MUC13	0.25	LOC101927056	0.2	ZNF148	0.2	MIR544B	0.12	SLC41A3	0.08	SNX4	0.04	MIR5092	0
Breast_SE_1221	PLXNA1	0.56	ALDH1L1-AS2	0.32	KLF15	0.26	TPRA1	0.26	SLC41A3	0.2	ALDH1L1	0.06	LINC01471	0.04	ALDH1L1-AS1	0	C3orf56	0	ZXDC	0
Breast_SE_1222	GATA2	0.55	MCM2	0.33	GATA2-AS1	0.24	PODXL2	0.24	RUVBL1-AS1	0.23	DNAJB8	0.19	RUVBL1	0.19	LINC01471	0.15	MGLL	0.13	MIR7976	0.05
Breast_SE_1223	MGLL	0.73	RUVBL1	0.3	ABTB1	0.3	EEFSEC	0.16	GATA2	0.14	DNAJB8-AS1	0.11	DNAJB8	0.11	KBTBD12	0.04	TPRA1	0.02	PLXNA1	0.01
Breast_SE_1224	SEC61A1	0.35	RAB7A	0.32	RUVBL1	0.23	ABTB1	0.2	EEFSEC	0.2	RPN1	0.19	GATA2-AS1	0.15	LOC90246	0.15	MIR7976	0.12	RUVBL1-AS1	0.08
Breast_SE_1225	GATA2	0.59	MCM2	0.53	LOC90246	0.48	EEFSEC	0.41	PODXL2	0.38	RAB7A	0.34	GATA2-AS1	0.34	DNAJB8	0.29	LOC653712	0.25	KIAA1257	0.23
Breast_SE_1226	GATA2	0.86	GATA2-AS1	0.7	LOC90246	0.47	RAB7A	0.46	ISY1	0.38	ISY1-RAB43	0.35	RUVBL1	0.31	EEFSEC	0.28	DNAJB8	0.19	EFCC1	0.18
Breast_SE_1230	IFT122	0.48	COPG1	0.45	LOC653712	0.38	ACAD9	0.31	MIR6826	0.3	EFCC1	0.23	MBD4	0.19	RPL32P3	0.18	RHO	0.17	KIAA1257	0.14
Breast_SE_1231	PLXND1	0.79	IFT122	0.46	MBD4	0.35	EFCC1	0.32	H1FOO	0.28	TMCC1	0.26	RPL32P3	0.26	HMCES	0.2	ISY1	0.2	GP9	0.19
Breast_SE_1235	RAB6B	0.59	BFSP2	0.55	BFSP2-AS1	0.35	TOPBP1	0.34	TMEM108	0.28	RYK	0.27	SLCO2A1	0.26	SRPRB	0.26	TF	0.24	UBA5	0.17
Breast_SE_1236	TOPBP1	0.53	MIR6827	0.48	AMOTL2	0.48	CDV3	0.45	UBA5	0.43	CEP63	0.4	TF	0.36	ANAPC13	0.26	NPHP3	0.2	MIR4788	0.19
Breast_SE_1237	SLCO2A1	0.64	RAB6B	0.63	C3orf36	0.46	TMEM108	0.29	SRPRB	0.26	KY	0.26	RYK	0.12	CEP63	0.11	EPHB1	0.06	ANAPC13	0.05
Breast_SE_1238	AMOTL2	0.68	MIR6827	0.62	SLCO2A1	0.31	MIR4788	0.26	TF	0.25	CEP63	0.25	NPHP3-AS1	0.24	KY	0.18	CDV3	0.15	TOPBP1	0.11
Breast_SE_1239	CEP63	0.47	PPP2R3A	0.38	EPHB1	0.31	KY	0.26	SLCO2A1	0.19	TF	0.19	MIR4788	0.14	RAB6B	0.14	ANAPC13	0.09	MIR6827	0.05
Breast_SE_1240	KY	0.95	RAB6B	0.29	RYK	0.29	CEP63	0.27	PPP2R3A	0.26	AMOTL2	0.21	EPHB1	0.16	SRPRB	0.15	SLCO2A1	0.15	CDV3	0.15
Breast_SE_1241	PCCB	0.63	MSL2	0.42	CEP63	0.39	MIR4788	0.34	NCK1-AS1	0.32	EPHB1	0.29	ANAPC13	0.28	NCK1	0.2	PPP2R3A	0.18	DZIP1L	0.12
Breast_SE_1242	NCK1	0.85	STAG1	0.84	NCK1-AS1	0.61	DBR1	0.33	SLC35G2	0.31	A4GNT	0.25	MSL2	0.23	DZIP1L	0.2	ESYT3	0.19	NME9	0.17
Breast_SE_1245	DZIP1L	0.9	CLDN18	0.62	A4GNT	0.47	ARMC8	0.19	FOXL2	0.17	DBR1	0.13	PRR23A	0.12	FOXL2NB	0.08	NME9	0.07	MRAS	0.06
Breast_SE_1247	CEP70	0.72	FAIM	0.62	ESYT3	0.53	PIK3CB	0.49	DBR1	0.47	MRAS	0.44	NME9	0.38	PISRT1	0.32	A4GNT	0.2	FOXL2	0.18
Breast_SE_1248	NME9	0.75	ESYT3	0.59	RBP1	0.41	BPESC1	0.36	RBP2	0.25	PISRT1	0.22	MRAS	0.2	PRR23A	0.17	FAIM	0.1	LINC01391	0.07
Breast_SE_1250	COPB2	0.43	MRPS22	0.37	CEP70	0.18	MRAS	0.17	PRR23C	0.16	FOXL2	0.15	FAIM	0.15	CLSTN2	0.04	FOXL2NB	0.02	LOC100507291	0.01
Breast_SE_1251	RBP1	0.59	CEP70	0.35	ESYT3	0.34	CLSTN2	0.33	MRPS22	0.2	COPB2	0.17	FAIM	0.17	PIK3CB	0.11	LOC100507291	0.11	FOXL2	0.06
Breast_SE_1252	PXYLP1	0.63	PCOLCE2	0.43	TRPC1	0.36	ATR	0.34	SLC25A36	0.33	LOC646730	0.19	SPSB4	0.16	GK5	0.15	LOC100507389	0.13	ZBTB38	0.11
Breast_SE_1253	LOC646730	0.63	ZBTB38	0.6	ATR	0.5	ATP1B3	0.47	PCOLCE2	0.45	RNF7	0.42	GK5	0.38	XRN1	0.37	PXYLP1	0.37	SLC25A36	0.36
Breast_SE_1258	C3orf58	0.63	GRK7	0.42	LOC100289361	0.41	TFDP2	0.39	PAQR9-AS1	0.34	XRN1	0.27	SLC9A9	0.2	TRPC1	0.18	GK5	0.1	SLC9A9-AS1	0.1
Breast_SE_1259	PLOD2	0.83	PLSCR4	0.46	HLTF-AS1	0.38	HPS3	0.35	GYG1	0.32	HLTF	0.29	SLC9A9	0.26	ZIC4	0.24	PLSCR1	0.2	PLSCR5	0.17
Breast_SE_1261	ZIC1	0.89	ZIC4	0.82	LOC440982	0.42	PLSCR1	0.38	HLTF-AS1	0.29	CP	0.26	HLTF	0.25	TM4SF1-AS1	0.25	PLSCR4	0.22	PLSCR2	0.17
Breast_SE_1262	GYG1	0.51	HPS3	0.41	RNF13	0.36	COMMD2	0.21	HLTF	0.18	AGTR1	0.18	TM4SF1-AS1	0.18	CP	0.12	TM4SF18	0.08	HLTF-AS1	0.02
Breast_SE_1263	HPS3	0.57	GYG1	0.57	AGTR1	0.47	RNF13	0.37	HLTF	0.27	COMMD2	0.26	TM4SF1-AS1	0.25	CP	0.18	CPA3	0.13	HLTF-AS1	0.1
Breast_SE_1264	HPS3	0.66	HLTF-AS1	0.6	CP	0.58	TM4SF1-AS1	0.5	HLTF	0.47	WWTR1-AS1	0.42	TM4SF18	0.37	LOC646903	0.12	RNF13	0.09	TM4SF4	0.07
Breast_SE_1265	WWTR1	0.75	HPS3	0.56	HLTF-AS1	0.54	HLTF	0.42	WWTR1-AS1	0.4	LOC646903	0.37	PFN2	0.31	TM4SF1	0.29	COMMD2	0.27	TM4SF18	0.23
Breast_SE_1268	PFN2	0.81	LOC646903	0.56	ERICH6-AS1	0.5	ERICH6	0.47	EIF2A	0.47	SERP1	0.3	COMMD2	0.3	WWTR1	0.26	LINC01214	0.25	LOC101928105	0.23
Breast_SE_1269	PFN2	0.8	LOC646903	0.55	ERICH6-AS1	0.49	ERICH6	0.47	EIF2A	0.46	SERP1	0.29	COMMD2	0.28	WWTR1	0.26	LINC01214	0.24	LOC101928105	0.23
Breast_SE_1270	PFN2	0.8	LOC646903	0.55	ERICH6-AS1	0.49	ERICH6	0.47	EIF2A	0.46	SERP1	0.29	COMMD2	0.28	WWTR1	0.25	LINC01214	0.24	LOC101928105	0.23
Breast_SE_1271	ERICH6-AS1	0.67	WWTR1-AS1	0.67	LINC01213	0.51	TSC22D2	0.4	SERP1	0.38	LOC646903	0.35	WWTR1	0.33	COMMD2	0.29	PFN2	0.26	RNF13	0.24
Breast_SE_1272	TSC22D2	0.59	LOC646903	0.55	ERICH6	0.55	WWTR1-AS1	0.54	PFN2	0.45	LOC101928105	0.42	SERP1	0.39	RNF13	0.35	LINC01214	0.35	COMMD2	0.32
Breast_SE_1274	LOC646903	0.43	TSC22D2	0.41	EIF2A	0.35	PFN2	0.33	LOC101928105	0.29	SERP1	0.29	LINC01214	0.25	MED12L	0.24	ERICH6-AS1	0.22	SIAH2	0.22
Breast_SE_1275	SIAH2	0.76	LOC101928105	0.68	LINC01214	0.58	SERP1	0.57	CLRN1-AS1	0.52	ERICH6-AS1	0.47	TSC22D2	0.42	CLRN1	0.39	P2RY14	0.38	EIF2A	0.33
Breast_SE_1276	MED12L	0.48	GPR87	0.44	LOC101928105	0.33	P2RY14	0.22	ERICH6-AS1	0.17	EIF2A	0.15	ERICH6	0.14	P2RY12	0.11	SIAH2	0.11	AADAC	0.1
Breast_SE_1277	MBNL1-AS1	0.6	MBNL1	0.46	IGSF10	0.38	P2RY12	0.3	SUCNR1	0.22	GPR171	0.22	LOC101928166	0.19	MED12L	0.16	C3orf79	0.13	AADACL2-AS1	0.04
Breast_SE_1278	MBNL1	0.59	MBNL1-AS1	0.58	P2RY12	0.39	DHX36	0.33	IGSF10	0.29	RAP2B	0.26	GPR87	0.25	SUCNR1	0.23	AADACL2-AS1	0.17	AADAC	0.16
Breast_SE_1279	PLCH1	0.93	CCNL1	0.45	GPR149	0.41	LEKR1	0.37	LINC01487	0.36	KCNAB1-AS2	0.35	LINC00881	0.14	C3orf33	0.01	KCNAB1-AS1	0	KCNAB1	0
Breast_SE_1280	PLCH1	0.37	CCNL1	0.36	GMPS	0.26	LEKR1	0.25	LINC00886	0.21	GPR149	0.2	KCNAB1-AS2	0.13	VEPH1	0.12	LINC01487	0.06	SLC33A1	0.05
Breast_SE_1281	TIPARP	0.71	SSR3	0.64	TIPARP-AS1	0.64	LINC00886	0.49	SLC33A1	0.37	PA2G4P4	0.27	GMPS	0.2	KCNAB1	0.2	SHOX2	0.19	LINC00880	0.18
Breast_SE_1282	CCNL1	0.38	SHOX2	0.3	KCNAB1-AS2	0.28	SLC33A1	0.22	SSR3	0.14	RSRC1	0.14	LINC00886	0.09	LEKR1	0.06	GMPS	0.05	LINC00881	0.05
Breast_SE_1283	RARRES1	0.66	RSRC1	0.59	LXN	0.41	LOC100996447	0.37	MLF1	0.33	GFM1	0.29	IQCJ-SCHIP1-AS1	0.25	MFSD1	0.25	LINC01100	0.25	CCNL1	0.18
Breast_SE_1285	IQCJ-SCHIP1	0.87	SCHIP1	0.87	IQCJ-SCHIP1-AS1	0.53	SMC4	0.24	IFT80	0.2	ARL14	0.18	KPNA4	0.17	MFSD1	0.13	MIR3919	0	MIR15B	0
Breast_SE_1286	IFT80	0.66	SPTSSB	0.43	NMD3	0.41	SMC4	0.4	B3GALNT1	0.39	C3orf80	0.31	IQCJ-SCHIP1-AS1	0.23	SCARNA7	0.18	KPNA4	0.16	TRIM59	0.14
Breast_SE_1287	SPTSSB	0.8	PPM1L	0.76	NMD3	0.61	B3GALNT1	0.49	IFT80	0.37	SMC4	0.29	IQCJ-SCHIP1-AS1	0.16	TRIM59	0.16	C3orf80	0.08	LINC01100	0.06
Breast_SE_1288	SPTSSB	0.79	PPM1L	0.7	NMD3	0.58	B3GALNT1	0.49	TRIM59	0.33	IFT80	0.3	SMC4	0.27	IQCJ-SCHIP1-AS1	0.22	ARL14	0.14	LINC01100	0.05
Breast_SE_1289	SERPINI1	0.78	GPR160	0.64	LRRC31	0.64	SAMD7	0.63	PDCD10	0.54	SEC62	0.45	GOLIM4	0.41	ZBBX	0.4	MYNN	0.35	LRRIQ4	0.14
Breast_SE_1291	MECOM	0.85	EGFEM1P	0.41	GOLIM4	0.4	ACTRT3	0.24	TERC	0.19	PHC3	0.09	MIR551B	0	LOC100128164	0	LRRC34	0	CLDN11	0
Breast_SE_1292	MECOM	0.74	PHC3	0.31	SKIL	0.2	ACTRT3	0.2	PRKCI	0.13	MIR6828	0.09	TERC	0.05	LOC101928583	0.03	CLDN11	0.02	MYNN	0.01
Breast_SE_1293	TERC	0.43	LRRC34	0.23	PHC3	0.22	MECOM	0.13	SEC62	0.11	MYNN	0.1	LOC100128164	0.07	LRRC31	0.06	ACTRT3	0.04	LRRIQ4	0.01
Breast_SE_1294	GPR160	0.92	LRRC31	0.85	LRRIQ4	0.38	PHC3	0.37	SAMD7	0.36	PRKCI	0.27	SEC62	0.14	SKIL	0.06	LOC101928583	0.02	RPL22L1	0
Breast_SE_1295	SKIL	0.68	MYNN	0.35	PRKCI	0.35	PHC3	0.31	ACTRT3	0.28	LRRC34	0.25	SEC62	0.25	LRRIQ4	0.22	GPR160	0.19	LOC101928583	0.12
Breast_SE_1297	EIF5A2	0.56	SLC2A2	0.52	LOC100128164	0.42	CLDN11	0.25	LRRC34	0.2	LOC101928583	0.13	MIR6828	0.13	SEC62	0.11	SLC7A14	0.03	PHC3	0.01
Breast_SE_1299	FNDC3B	0.5	PLD1	0.46	TMEM212	0.33	TMEM212-AS1	0.26	SLC2A2	0.18	SKIL	0.14	NCEH1	0.11	SPATA16	0.08	GHSR	0.08	CLDN11	0.06
Breast_SE_1300	GHSR	0.38	FNDC3B	0.28	RPL22L1	0.27	NLGN1	0.24	PLD1	0.19	TMEM212	0.16	TMEM212-AS1	0.12	LOC101928583	0.08	EIF5A2	0.05	NCEH1	0.02
Breast_SE_1301	FNDC3B	0.73	EIF5A2	0.52	TMEM212	0.43	PLD1	0.3	NLGN1	0.24	NCEH1	0.24	SKIL	0.19	SLC2A2	0.18	TMEM212-AS1	0.14	LOC101928583	0.12
Breast_SE_1302	ECT2	0.37	TNFSF10	0.28	LOC101928583	0.19	SPATA16	0.14	TNIK	0.13	NCEH1	0.09	NLGN1-AS1	0.01	MIR569	0	TMEM212	0	SLC2A2	0
Breast_SE_1303	ECT2	0.34	NLGN1	0.3	NCEH1	0.23	SLC2A2	0.2	NLGN1-AS1	0.19	TMEM212	0.1	FNDC3B	0.07	LOC101928583	0.05	MIR569	0	TNIK	0
Breast_SE_1304	NLGN1-AS1	0	NLGN1	0	SPATA16	0	ECT2	0	NAALADL2	0	NCEH1	0	TNFSF10	0	NAALADL2-AS3	0	GHSR	0	MIR4789	0
Breast_SE_1305	NAALADL2	0.8	NAALADL2-AS3	0.63	LINC01208	0.57	TNIK	0.39	TNFSF10	0.32	NLGN1-AS1	0.25	TMEM212	0.24	ECT2	0.23	SPATA16	0.11	TMEM212-AS1	0.06
Breast_SE_1306	TMEM212	0.47	NLGN1-AS1	0.45	NLGN1	0.4	LINC01208	0.39	FNDC3B	0.3	SPATA16	0.29	TBL1XR1	0.26	TMEM212-AS1	0.26	NAALADL2	0.21	NAALADL2-AS2	0.16
Breast_SE_1307	NAALADL2	0.66	GHSR	0.55	LINC00501	0.5	ECT2	0.43	NAALADL2-AS3	0.43	TBL1XR1	0.41	LINC00578	0.38	LINC01208	0.35	TMEM212-AS1	0.25	TNFSF10	0.03
Breast_SE_1314	LINC00501	0.67	KCNMB3	0.6	NAALADL2	0.57	LINC00578	0.54	NAALADL2-AS3	0.51	TBL1XR1	0.48	LINC01208	0.47	MFN1	0.35	KCNMB2	0.34	LOC101928739	0.22
Breast_SE_1315	LINC00578	0.36	KCNMB3	0.26	NAALADL2-AS3	0.23	LINC00501	0.23	LOC101928739	0.21	LINC01208	0.11	LINC01014	0.05	GNB4	0.04	MFN1	0.03	ZNF639	0.02
Breast_SE_1316	LINC00501	0.67	LINC00578	0.54	KCNMB3	0.38	GNB4	0.32	TBL1XR1	0.32	LINC01014	0.24	MFN1	0.17	LINC01208	0.15	NDUFB5	0.13	KCNMB2	0.08
Breast_SE_1317	LINC00501	0.65	TBL1XR1	0.54	LINC00578	0.5	KCNMB3	0.35	LINC01208	0.35	MFN1	0.22	NDUFB5	0.19	GNB4	0.16	LINC01014	0.02	MIR7977	0
Breast_SE_1318	LINC00501	0.54	TBL1XR1	0.44	LINC00578	0.43	KCNMB3	0.37	LINC01014	0.27	GNB4	0.21	NDUFB5	0.16	LINC01208	0.09	MFN1	0.08	KCNMB2	0.04
Breast_SE_1319	USP13	0.48	FXR1	0.47	NDUFB5	0.44	ZNF639	0.4	DNAJC19	0.32	ACTL6A	0.28	MFN1	0.2	MRPL47	0.15	SOX2-OT	0.11	LOC101928739	0.07
Breast_SE_1321	B3GNT5	0.59	MCF2L2	0.36	LAMP3	0.33	ABCC5-AS1	0.28	EIF2B5	0.2	ATP11B	0.17	KLHL6	0.15	DCUN1D1	0.13	KLHL6-AS1	0.13	MCCC1	0.08
Breast_SE_1325	CAMK2N2	0.58	ABCC5	0.44	PARL	0.41	KLHL24	0.41	ABCC5-AS1	0.38	HTR3D	0.33	MAP6D1	0.33	ECE2	0.31	EIF2B5	0.25	ABCF3	0.22
Breast_SE_1326	CAMK2N2	0.53	DVL3	0.49	AP2M1	0.45	POLR2H	0.4	FAM131A	0.36	ABCC5-AS1	0.27	ABCF3	0.26	HTR3C	0.26	EIF2B5	0.2	ECE2	0.19
Breast_SE_1328	FAM131A	0.74	ECE2	0.35	EIF2B5	0.32	EIF4G1	0.32	ALG3	0.3	CAMK2N2	0.29	DVL3	0.28	ABCF3	0.25	THPO	0.18	PSMD2	0.18
Breast_SE_1329	EPHB3	0.92	MAGEF1	0.61	VWA5B2	0.48	VPS8	0.37	MIR1224	0.37	POLR2H	0.3	DVL3	0.3	CHRD	0.29	THPO	0.29	EIF2B5	0.16
Breast_SE_1330	LIPH	0.53	EPHB3	0.51	MAGEF1	0.43	C3orf70	0.33	CLCN2	0.29	MAP3K13	0.12	TMEM41A	0.11	THPO	0.07	POLR2H	0.07	SENP2	0.01
Breast_SE_1331	IGF2BP2	0.95	ETV5	0.66	DNAJB11	0.45	FETUB	0.4	DGKG	0.3	MIR548AQ	0.28	AHSG	0.27	EHHADH-AS1	0.26	TRA2B	0.08	MIR5588	0
Breast_SE_1335	ADIPOQ	0.35	ADIPOQ-AS1	0.35	CRYGS	0.23	RFC4	0.23	KNG1	0.21	TBCCD1	0.2	RPL39L	0.18	SNORD2	0.12	MIR1248	0.07	SNORA4	0.05
Breast_SE_1336	ST6GAL1	0.64	SNORD2	0.38	SNORA4	0.36	SNORA63	0.31	ADIPOQ-AS1	0.25	ADIPOQ	0.24	MIR1248	0.24	SNORA81	0.23	RPL39L	0.11	RFC4	0
Breast_SE_1338	BCL6	0.77	LPP-AS2	0.56	LOC100131635	0.55	FLJ42393	0.29	ST6GAL1	0.29	RTP4	0.17	RTP2	0.07	SNORA4	0.07	LPP	0.06	SNORA63	0.02
Breast_SE_1339	LPP-AS2	0.53	BCL6	0.41	LPP	0.39	MASP1	0.29	TPRG1	0.28	TPRG1-AS2	0.25	FLJ42393	0.19	LOC100131635	0.18	LPP-AS1	0.17	LOC101929130	0.17
Breast_SE_1342	TPRG1-AS2	0.77	LOC100131635	0.56	TPRG1	0.56	TPRG1-AS1	0.55	BCL6	0.23	GMNC	0.21	MIR28	0	SST	0	CLDN1	0	MIR944	0
Breast_SE_1343	TPRG1	0.57	LPP-AS2	0.49	LOC100131635	0.36	BCL6	0.27	TPRG1-AS1	0.27	TPRG1-AS2	0.22	TMEM207	0.09	RTP2	0.07	MIR28	0	SNAR-I	0
Breast_SE_1344	LPP-AS2	0.56	TPRG1-AS1	0.34	TPRG1	0.32	IL1RAP	0.19	TPRG1-AS2	0.17	LPP	0.15	FLJ42393	0.13	CCDC50	0.06	LINCR-0002	0.05	CLDN16	0.04
Breast_SE_1346	CLDN16	0.47	CLDN1	0.45	TMEM207	0.41	TPRG1-AS1	0.39	IL1RAP	0.24	FGF12	0.16	FGF12-AS1	0.11	TPRG1	0.08	TPRG1-AS2	0.06	MIR944	0.06
Breast_SE_1347	IL1RAP	0.69	TPRG1-AS1	0.38	UTS2B	0.33	LINCR-0002	0.22	OSTN	0.14	TP63	0.14	MIR944	0.06	CLDN1	0.03	TPRG1-AS2	0.02	SNAR-I	0
Breast_SE_1348	CCDC50	0.67	UTS2B	0.54	IL1RAP	0.45	MGC2889	0.26	OSTN	0.25	LINCR-0002	0.12	MB21D2	0.09	FGF12-AS1	0.09	CLDN1	0.06	CLDN16	0.04
Breast_SE_1350	MB21D2	0.39	LRRC15	0.29	CCDC50	0.28	FGF12	0.28	CPN2	0.19	LINCR-0002	0.16	GP5	0.15	OPA1-AS1	0.08	FGF12-AS1	0.04	PYDC2	0
Breast_SE_1351	ATP13A4	0.42	OPA1	0.37	LSG1	0.33	ATP13A5-AS1	0.32	CPN2	0.3	LINC00887	0.3	ATP13A5	0.29	OPA1-AS1	0.27	ATP13A4-AS1	0.25	TMEM44-AS1	0.24
Breast_SE_1352	ATP13A5-AS1	0.25	HRASLS	0.24	ATP13A5	0.23	ATP13A4	0.2	TMEM44-AS1	0.18	OPA1	0.17	OPA1-AS1	0.16	CPN2	0.15	HES1	0.12	DPPA2P3	0.11
Breast_SE_1353	HES1	0.67	LINC00887	0.53	ATP13A4	0.53	HRASLS	0.5	MGC2889	0.45	DPPA2P3	0.43	ATP13A5	0.42	ATP13A5-AS1	0.4	OPA1-AS1	0.37	OPA1	0.34
Breast_SE_1354	LINC00887	0.58	HES1	0.39	ATP13A4	0.36	ATP13A4-AS1	0.32	MIR3137	0.25	XXYLT1-AS1	0.24	CPN2	0.19	XXYLT1-AS2	0.17	DPPA2P3	0.14	FAM43A	0.09
Breast_SE_1355	LRRC15	0.66	ATP13A3	0.42	GP5	0.38	TMEM44	0.38	LINC00884	0.37	XXYLT1	0.17	TMEM44-AS1	0.15	LSG1	0.11	CPN2	0.09	XXYLT1-AS2	0.09
Breast_SE_1357	FAM43A	0.6	XXYLT1	0.59	TMEM44	0.55	LRRC15	0.55	GP5	0.42	XXYLT1-AS2	0.29	CPN2	0.19	LSG1	0.15	LINC00969	0.14	ATP13A3	0.13
Breast_SE_1358	SDHAP2	0.42	XXYLT1-AS1	0.3	APOD	0.27	LINC00969	0.22	TFRC	0.16	MIR570	0.15	LINC00885	0.14	SDHAP1	0.13	XXYLT1	0.08	SLC51A	0.05
Breast_SE_1359	TM4SF19	0.53	TM4SF19-AS1	0.48	MUC4	0.39	PCYT1A	0.38	TNK2	0.36	TM4SF19-TCTEX1D2	0.35	MIR6829	0.3	ACAP2	0.29	PPP1R2	0.17	MUC20	0.13
Breast_SE_1360	LINC00885	0.85	TCTEX1D2	0.57	RNF168	0.48	MUC20	0.46	SLC51A	0.4	LINC00969	0.29	UBXN7	0.22	MIR570	0.21	TFRC	0.2	SDHAP2	0.17
Breast_SE_1362	TCTEX1D2	0.54	RNF168	0.42	PIGX	0.38	CEP19	0.36	PAK2	0.34	UBXN7-AS1	0.24	ZDHHC19	0.23	UBXN7	0.23	LINC01063	0.22	SENP5	0.15
Breast_SE_1364	FBXO45	0.48	LINC01063	0.46	PAK2	0.43	RNF168	0.42	SENP5	0.42	PIGX	0.41	WDR53	0.41	TCTEX1D2	0.31	NCBP2	0.22	PIGZ	0.22
Breast_SE_1366	NRROS	0.34	WDR53	0.29	UBXN7-AS1	0.24	NCBP2	0.2	DLG1-AS1	0.18	BDH1	0.18	FBXO45	0.17	DLG1	0.15	UBXN7	0.13	SENP5	0.12
Breast_SE_1367	DLG1	0.52	PAK2	0.49	NRROS	0.44	DLG1-AS1	0.41	NCBP2	0.37	LOC220729	0.32	FYTTD1	0.31	MIR922	0.3	IQCG	0.29	LRCH3	0.27
Breast_SE_1370	BDH1	0.68	LOC220729	0.67	DLG1-AS1	0.64	DLG1	0.54	NCBP2-AS2	0.52	SENP5	0.48	MIR922	0.47	NCBP2	0.39	LMLN-AS1	0.33	LMLN	0.28
Breast_SE_1371	NCBP2-AS2	0.49	MIR922	0.45	PAK2	0.32	FYTTD1	0.27	LMLN-AS1	0.22	PIGX	0.2	LMLN	0.17	LRCH3	0.17	LOC220729	0.14	NCBP2	0.14
Breast_SE_1373	NCBP2-AS2	0.55	LMLN-AS1	0.41	MIR922	0.4	LMLN	0.38	PIGZ	0.37	PIGX	0.28	PAK2	0.28	FYTTD1	0.25	BDH1	0.17	SENP5	0.14
Breast_SE_1374	PCGF3	0.57	MYL5	0.52	ATP5I	0.51	GAK	0.5	ABCA11P	0.48	DGKQ	0.46	ZNF141	0.42	LOC100129917	0.31	CPLX1	0.29	SLC26A1	0.25
Breast_SE_1375	CTBP1-AS	0.54	CTBP1	0.48	FGFRL1	0.46	ATP5I	0.39	MYL5	0.38	SPON2	0.38	SLC26A1	0.31	CTBP1-AS2	0.3	PCGF3	0.27	MFSD7	0.22
Breast_SE_1376	SPON2	0.71	CTBP1-AS2	0.5	CTBP1-AS	0.46	CTBP1	0.44	FGFRL1	0.36	MAEA	0.34	PCGF3	0.24	NKX1-1	0.22	GAK	0.2	UVSSA	0.19
Breast_SE_1377	MAEA	0.79	CTBP1-AS	0.62	CTBP1	0.61	NKX1-1	0.6	TACC3	0.59	FGFRL1	0.52	SLBP	0.44	TMEM129	0.43	CTBP1-AS2	0.43	FAM53A	0.39
Breast_SE_1378	SLBP	0.69	NELFA	0.66	MIR943	0.58	CTBP1-AS	0.55	CTBP1	0.49	NAT8L	0.48	TACC3	0.45	LETM1	0.38	MAEA	0.32	NKX1-1	0.31
Breast_SE_1379	NELFA	0.79	HAUS3	0.74	MIR943	0.73	TACC3	0.67	RNF4	0.63	NAT8L	0.61	LETM1	0.58	SLBP	0.57	CRIPAK	0.55	SCARNA22	0.44
Breast_SE_1380	NAT8L	0.7	SLBP	0.51	NELFA	0.45	MIR943	0.35	HAUS3	0.35	RNF4	0.35	FAM193A	0.29	FAM53A	0.28	POLN	0.24	MXD4	0.2
Breast_SE_1381	MXD4	0.55	MIR4800	0.5	POLN	0.45	NAT8L	0.44	FAM193A	0.4	HAUS3	0.35	SH3BP2	0.34	NELFA	0.26	SLBP	0.26	TACC3	0.26
Breast_SE_1382	ZFYVE28	0.78	TNIP2	0.35	NOP14-AS1	0.2	NOP14	0.2	RNF4	0.18	ADD1	0.18	HAUS3	0.14	MXD4	0.11	POLN	0.08	MIR4800	0.06
Breast_SE_1383	FAM193A	0.77	ADD1	0.62	HAUS3	0.62	MXD4	0.6	MIR4800	0.57	RNF4	0.56	NELFA	0.55	SH3BP2	0.54	MIR943	0.54	NOP14-AS1	0.5
Breast_SE_1384	NAT8L	0.69	ADD1	0.67	RNF4	0.63	FAM193A	0.6	TNIP2	0.58	NOP14-AS1	0.52	NOP14	0.44	MIR943	0.36	HTT	0.35	MXD4	0.3
Breast_SE_1386	FAM193A	0.65	TNIP2	0.62	SH3BP2	0.6	HAUS3	0.59	NOP14-AS1	0.5	ADD1	0.48	RNF4	0.43	GRK4	0.43	NOP14	0.42	ZFYVE28	0.36
Breast_SE_1389	DOK7	0.58	TMEM128	0.46	ADRA2C	0.43	FAM86EP	0.4	LRPAP1	0.35	RGS12	0.35	HTT	0.31	NOP14-AS1	0.27	TNIP2	0.25	NOP14	0.24
Breast_SE_1391	LINC01396	0.73	STX18-AS1	0.69	STX18	0.67	TMEM128	0.53	LOC101928279	0.51	FAM86EP	0.41	LRPAP1	0.28	ZBTB49	0.28	LYAR	0.25	NSG1	0.22
Breast_SE_1392	MSX1	0.93	LINC01396	0.66	LOC101928279	0.63	STX18	0.63	STX18-AS1	0.56	NSG1	0.4	LYAR	0.33	CRMP1	0.31	ADRA2C	0.3	STK32B	0.25
Breast_SE_1393	EVC	0.84	CRMP1	0.67	EVC2	0.51	CYTL1	0.38	MAN2B2	0.24	STK32B	0.23	MRFAP1	0.19	BLOC1S4	0.09	MSX1	0.04	MIR378D1	0
Breast_SE_1395	MRFAP1	0.69	LOC93622	0.6	KIAA0232	0.57	TADA2B	0.47	CCDC96	0.45	MRFAP1L1	0.44	PPP2R2C	0.44	TBC1D14	0.41	BLOC1S4	0.41	GRPEL1	0.4
Breast_SE_1396	PPP2R2C	0.7	LOC93622	0.63	S100P	0.58	KIAA0232	0.56	JAKMIP1	0.47	MRFAP1L1	0.46	CCDC96	0.36	TADA2B	0.31	WFS1	0.26	TBC1D14	0.24
Breast_SE_1397	TBC1D14	0.79	LOC100129931	0.76	TADA2B	0.7	KIAA0232	0.64	CCDC96	0.57	MRFAP1	0.53	MRFAP1L1	0.5	BLOC1S4	0.42	WFS1	0.42	JAKMIP1	0.38
Breast_SE_1398	SORCS2	0.6	LOC389199	0.4	AFAP1	0.39	AFAP1-AS1	0.36	MRFAP1L1	0.24	PSAPL1	0.15	ABLIM2	0.13	BLOC1S4	0.09	LOC93622	0.07	MRFAP1	0.07
Breast_SE_1400	AFAP1	0.59	SORCS2	0.54	LOC389199	0.46	AFAP1-AS1	0.29	GRPEL1	0.22	TADA2B	0.16	TBC1D14	0.12	LOC100129931	0.12	CPZ	0.12	ACOX3	0.11
Breast_SE_1401	SH3TC1	0.55	HTRA3	0.52	ABLIM2	0.22	ACOX3	0.19	MIR95	0.18	TRMT44	0.13	PSAPL1	0.12	SORCS2	0.09	MIR4274	0	MIR4798	0
Breast_SE_1402	GPR78	0.52	ABLIM2	0.37	HTRA3	0.23	CPZ	0.08	MIR95	0.08	ACOX3	0	USP17L11	0	USP17L18	0	USP17L20	0	USP17L12	0
Breast_SE_1403	WDR1	0.72	SLC2A9	0.26	MIR548I2	0.24	MIR3138	0.16	ZNF518B	0.07	CLNK	0	USP17L6P	0	USP17L9P	0	USP17L25	0	USP17L26	0
Breast_SE_1407	MIR5091	0.69	MIR3138	0.52	LINC01182	0.42	BOD1L1	0.32	SLC2A9	0.32	HS3ST1	0.31	WDR1	0.15	ZNF518B	0.14	CLNK	0	USP17L6P	0
Breast_SE_1410	LINC01085	0.56	LINC01182	0.5	BST1	0.46	LOC101929095	0.44	CC2D2A	0.43	FAM200B	0.29	CD38	0.27	MIR5091	0.24	BOD1L1	0.15	RAB28	0.11
Breast_SE_1411	CPEB2	0.7	FBXL5	0.54	LOC101929095	0.47	TAPT1	0.42	BOD1L1	0.41	BST1	0.37	FAM200B	0.37	CC2D2A	0.24	TAPT1-AS1	0.06	CD38	0
Breast_SE_1413	FAM200B	0.59	CPEB2	0.52	BST1	0.5	CC2D2A	0.38	LAP3	0.34	LOC101929095	0.32	FBXL5	0.32	LINC01085	0.28	CD38	0.27	LDB2	0.2
Breast_SE_1414	FGFBP1	0.53	C1QTNF7	0.44	LAP3	0.32	TAPT1-AS1	0.26	FAM200B	0.25	PROM1	0.2	CPEB2	0.18	BST1	0.14	CD38	0.14	LOC101929095	0.13
Breast_SE_1415	PROM1	0.46	FGFBP2	0.46	FAM184B	0.2	CPEB2-AS1	0.14	TAPT1	0.11	CD38	0	FGFBP1	-0.1	C1QTNF7	-0.1	TAPT1-AS1	-0.2	LDB2	-0.2
Breast_SE_1419	CCDC149	0.66	SEPSECS	0.44	DHX15	0.3	PI4K2B	0.3	SLC34A2	0.26	SOD3	0.2	LGI2	0.17	LOC101929161	0.15	SEPSECS-AS1	0.08	ANAPC4	0.04
Breast_SE_1422	RBPJ	0.71	SMIM20	0.48	PI4K2B	0.47	ANAPC4	0.35	SEPSECS-AS1	0.29	STIM2	0.24	LOC101929161	0.19	SEL1L3	0.16	CCDC149	0.12	SOD3	0.11
Breast_SE_1425	PCDH7	0.68	LOC101928622	0.34	LOC101929161	0.22	SEL1L3	0.18	STIM2	0.13	CCKAR	0.13	RBPJ	0.05	TBC1D19	0.05	DTHD1	0.04	MIR4275	0
Breast_SE_1426	C4orf19	0.8	NWD2	0.78	RELL1	0.4	LINC01258	0.24	KLF3	0.21	ARAP2	0.14	KLF3-AS1	0.07	LOC439933	0.03	MIR4801	0	TLR1	0
Breast_SE_1427	TBC1D1	0.64	KLF3-AS1	0.52	TLR1	0.46	LINC01258	0.4	FAM114A1	0.35	LOC100508631	0.25	KLHL5	0.23	PGM2	0.18	TLR6	0.17	TLR10	0.15
Breast_SE_1429	KLF3	0.71	LINC01258	0.65	KLF3-AS1	0.6	TLR1	0.29	RFC1	0.2	WDR19	0.17	TBC1D1	0.1	TLR10	0.02	MIR5591	0	FAM114A1	0
Breast_SE_1430	KLHL5	0.78	TMEM156	0.68	MIR574	0.34	FAM114A1	0.32	LIAS	0.28	RPL9	0.19	UGDH	0.17	KLB	0.11	TLR1	0.09	RFC1	0.09
Breast_SE_1431	SMIM14	0.7	UGDH-AS1	0.68	UGDH	0.46	RHOH	0.29	FAM114A1	0.19	MIR574	0.13	UBE2K	0.11	KLB	0.09	KLHL5	0.08	WDR19	0.03
Breast_SE_1432	N4BP2	0.7	PDS5A	0.6	UBE2K	0.47	RBM47	0.37	KLB	0.33	UGDH-AS1	0.27	WDR19	0.2	LIAS	0.17	RFC1	0.17	NSUN7	0.12
Breast_SE_1433	RHOH	0.55	RBM47	0.3	UGDH-AS1	0.23	LOC344967	0.14	PDS5A	0.06	LOC401127	0.05	NSUN7	0.01	LIAS	0	MIR4802	0	MIR5591	0
Breast_SE_1434	RBM47	0.93	NSUN7	0.52	RHOH	0.47	SMIM14	0.46	PDS5A	0.39	N4BP2	0.35	KLB	0.35	UCHL1-AS1	0.26	UGDH-AS1	0.17	MIR4802	0
Breast_SE_1435	APBB2	0.47	SHISA3	0.32	DCAF4L1	0.26	TMEM33	0.17	LOC344967	0.13	CHRNA9	0.07	PHOX2B	0.05	MIR4802	0	PDS5A	0	SLC30A9	0
Breast_SE_1436	APBB2	0.7	PDS5A	0.33	DCAF4L1	0.29	TMEM33	0.28	ATP8A1	0.27	N4BP2	0.2	LOC344967	0.2	PHOX2B	0.17	SLC30A9	0.17	SHISA3	0.16
Breast_SE_1437	LIMCH1	0.87	RBM47	0.54	ATP8A1	0.5	NSUN7	0.47	PDS5A	0.36	RHOH	0.31	UCHL1-AS1	0.3	N4BP2	0.25	PHOX2B	0.21	DCAF4L1	0.16
Breast_SE_1438	LIMCH1	0.73	GRXCR1	0.51	PHOX2B	0.42	NSUN7	0.36	SHISA3	0.35	DCAF4L1	0.25	UCHL1-AS1	0.23	RBM47	0.19	ATP8A1	0.19	UCHL1	0.08
Breast_SE_1443	SLAIN2	0.75	OCIAD1	0.63	LOC101927179	0.19	OCIAD2	0.18	COMMD8	0.16	ZAR1	0.07	CWH43	0.05	TEC	0	GABRA4	0	ATP10D	0
Breast_SE_1446	LOC101927157	0.48	CWH43	0.45	CNGA1	0.34	OCIAD2	0.25	GABRB1	0.2	NFXL1	0.18	FRYL	0.17	GABRA4	0.08	LOC101927179	0.08	ZAR1	0.03
Breast_SE_1447	RASL11B	0.63	SNORA26	0.54	MIR4449	0.5	DANCR	0.36	ERVMER34-1	0.25	LOC100506444	0.24	SPATA18	0.16	USP46	0.13	USP46-AS1	0.13	LRRC66	0.1
Breast_SE_1449	CHIC2	0.63	GSX2	0.58	SCFD2	0.49	TMEM165	0.41	RPL21P44	0.36	KDR	0.27	LNX1-AS1	0.15	PDGFRA	0.1	SNORA26	0.1	ERVMER34-1	0.05
Breast_SE_1450	PDGFRA	0.84	LNX1-AS1	0.49	RASL11B	0.47	KIT	0.28	KDR	0.19	TMEM165	0.17	LOC100506444	0.13	CHIC2	0.12	CLOCK	0.02	SRD5A3	0.02
Breast_SE_1452	GSX2	0.5	PAICS	0.49	SRP72	0.47	CHIC2	0.45	AASDH	0.41	CLOCK	0.38	EXOC1	0.35	TMEM165	0.26	PPAT	0.26	RPL21P44	0.22
Breast_SE_1453	SRD5A3-AS1	0.4	KIAA1211	0.38	SRD5A3	0.31	PDCL2	0.3	AASDH	0.24	CEP135	0.14	THEGL	0.09	NMU	0.06	GSX2	0.05	PDGFRA	0
Breast_SE_1454	REST	0.51	AASDH	0.47	KIAA1211	0.46	CEP135	0.45	PAICS	0.41	NOA1	0.37	EXOC1	0.36	PPAT	0.35	POLR2B	0.34	THEGL	0.3
Breast_SE_1455	IGFBP7-AS1	0.85	IGFBP7	0.81	POLR2B	0.32	CEP135	0.25	ARL9	0.19	PAICS	0.16	EXOC1	0.14	THEGL	0.13	PPAT	0.05	MIR7641-2	0
Breast_SE_1459	RUFY3	0.58	GRSF1	0.57	MOB1B	0.54	UTP3	0.28	ODAM	0.25	AMTN	0.22	PRR27	0.22	CSN1S2BP	0.22	CSN3	0.22	ENAM	0.16
Breast_SE_1460	ADAMTS3	0.46	PF4	0.41	AFM	0.3	ANKRD17	0.28	RUFY3	0.27	ALB	0.22	CXCL1	0.19	GRSF1	0.15	CXCL6	0.06	AFP	0.06
Breast_SE_1462	CXCL8	0.57	CXCL2	0.52	MTHFD2L	0.52	CXCL3	0.49	PF4	0.45	CXCL5	0.41	CXCL1	0.4	AFP	0.32	ALB	0.32	EREG	0.29
Breast_SE_1463	PF4	0.59	MTHFD2L	0.59	CXCL1	0.57	CXCL8	0.48	CXCL3	0.46	PPBP	0.43	CXCL5	0.42	CXCL2	0.41	AREG	0.34	EREG	0.24
Breast_SE_1465	MTHFD2L	0.47	CXCL2	0.43	CXCL8	0.41	CXCL3	0.35	PF4	0.34	CXCL1	0.32	EREG	0.29	CXCL5	0.25	ALB	0.24	PPBPP2	0.21
Breast_SE_1466	AREG	0.73	EREG	0.53	PPBP	0.45	MTHFD2L	0.42	EPGN	0.42	RASSF6	0.31	CXCL3	0.26	CXCL2	0.22	CXCL1	0.15	CXCL8	0.09
Breast_SE_1468	AREG	0.59	PF4	0.55	PPBP	0.49	THAP6	0.38	MTHFD2L	0.37	EREG	0.32	CXCL1	0.27	EPGN	0.25	BTC	0.23	PF4V1	0.17
Breast_SE_1469	FAM47E	0.67	SCARB2	0.52	NAAA	0.38	FAM47E-STBD1	0.36	STBD1	0.32	SHROOM3	0.32	ART3	0.26	MIR548AH	0.12	SDAD1	0.09	CCDC158	0.08
Breast_SE_1470	SHROOM3	0.66	FAM47E	0.5	MIR548AH	0.32	MIR4450	0.31	STBD1	0.28	FAM47E-STBD1	0.28	ART3	0.25	SCARB2	0.24	CXCL9	0.21	CCDC158	0.19
Breast_SE_1471	NUP54	0.44	LOC101928809	0.43	STBD1	0.35	CCNI	0.32	CCDC158	0.22	MIR4450	0.21	CXCL11	0.07	MRPL1	0.07	CCNG2	0	SCARB2	0
Breast_SE_1472	CCNG2	0.66	FAM47E	0.48	SCARB2	0.44	SHROOM3	0.4	CCNI	0.39	SOWAHB	0.17	CXCL9	0.15	MIR548AH	0.12	CNOT6L	0.12	CXCL13	0.12
Breast_SE_1474	ANXA3	0.72	FRAS1	0.48	BMP2K	0.26	SOWAHB	0.17	PRDM8	0.07	LINC00989	0.05	PCAT4	0.02	MRPL1	0.01	FGF5	0	MIR5096	0
Breast_SE_1475	ANTXR2	0.68	PRDM8	0.67	LINC01094	0.59	FGF5	0.58	C4orf22	0.41	PAQR3	0.39	BMP2K	0.28	LOC101928942	0.22	MRPL1	0.2	PCAT4	0.17
Breast_SE_1476	HNRNPD	0.53	HELQ	0.49	LIN54	0.46	HNRNPDL	0.39	SCD5	0.36	TMEM150C	0.29	COPS4	0.23	LINC00575	0.22	ENOPH1	0.22	SEC31A	0.21
Breast_SE_1477	HNRNPD	0.53	HELQ	0.49	LIN54	0.47	HNRNPDL	0.39	SCD5	0.36	TMEM150C	0.29	COPS4	0.23	LINC00575	0.22	ENOPH1	0.22	SEC31A	0.21
Breast_SE_1478	HNRNPD	0.53	HELQ	0.49	LIN54	0.47	HNRNPDL	0.39	SCD5	0.36	TMEM150C	0.29	COPS4	0.23	LINC00575	0.22	ENOPH1	0.22	SEC31A	0.21
Breast_SE_1479	TMEM150C	0.87	ENOPH1	0.25	RASGEF1B	0.14	LIN54	0.13	MRPS18C	0.03	MIR575	0	COQ2	0	PRKG2	0	SCD5	0	HELQ	0
Breast_SE_1480	COQ2	0.34	THAP9	0.24	SCD5	0.24	PLAC8	0.2	LINC00575	0.18	SEC31A	0.16	NKX6-1	0.16	RASGEF1B	0.05	LIN54	0.01	HELQ	0
Breast_SE_1481	PLAC8	0.68	COQ2	0.54	LIN54	0.29	SEC31A	0.27	NKX6-1	0.23	HPSE	0.2	SCD5	0.18	COPS4	0.17	HNRNPD	0.1	MRPS18C	0.03
Breast_SE_1482	WDFY3	0.44	HPSE	0.38	COQ2	0.35	SEC31A	0.32	PLAC8	0.31	HELQ	0.3	NKX6-1	0.29	MRPS18C	0.23	HNRNPDL	0.2	COPS4	0.19
Breast_SE_1484	LOC101929064	0.6	HSD17B13	0.5	ARHGAP24	0.48	NKX6-1	0.3	HSD17B11	0.27	DSPP	0.23	WDFY3-AS2	0.09	SPARCL1	0.06	MIR5705	0	PTPN13	0
Breast_SE_1486	AFF1	0.66	MIR4451	0.31	KLHL8	0.28	MAPK10	0.25	SPP1	0.21	MIR4452	0.17	C4orf36	0.17	HSD17B13	0.17	PKD2	0.15	MIR5705	0
Breast_SE_1490	PDLIM5	0.57	SMARCAD1	0.41	ADH5	0.35	UNC5C	0.34	STPG2	0.27	HPGDS	0.15	STPG2-AS1	0.15	TSPAN5	0.14	RAP1GDS1	0.14	METAP1	0.06
Breast_SE_1491	PDLIM5	0.6	TSPAN5	0.27	ADH5	0.27	STPG2	0.26	SMARCAD1	0.2	RAP1GDS1	0.17	METAP1	0.15	HPGDS	0.13	UNC5C	0.11	STPG2-AS1	0.05
Breast_SE_1492	BMPR1B	0.91	BMPR1B-AS1	0.9	UNC5C	0.44	PDHA2	0.28	ADH4	0.17	EIF4E	0.15	METAP1	0.1	RAP1GDS1	0.05	ADH5	0.02	SMARCAD1	0.01
Breast_SE_1493	BMPR1B	0.93	BMPR1B-AS1	0.88	PDHA2	0.33	EIF4E	0.26	UNC5C	0.2	ADH4	0.08	HPGDS	0.04	RAP1GDS1	0.04	STPG2	0.01	LOC101929210	0
Breast_SE_1496	PCNAP1	0.63	HPGDS	0.2	EIF4E	0.1	STPG2-AS1	0.08	ADH1A	0.05	STPG2	0.02	MIR3684	0	ADH1B	0	LOC100507053	0	BMPR1B	0
Breast_SE_1498	TSPAN5	0.83	RAP1GDS1	0.5	ADH1B	0.47	ADH1A	0.37	LOC100507053	0.34	ADH5	0.33	ADH1C	0.31	STPG2	0.28	STPG2-AS1	0.26	ADH4	0.17
Breast_SE_1501	ADH1C	0.4	LAMTOR3	0.38	DNAJB14	0.35	MTTP	0.34	C4orf17	0.24	ADH7	0.22	H2AFZ	0.21	LOC256880	0.21	ADH1B	0.16	LOC101929353	0.14
Breast_SE_1502	PPP3CA	0.77	FLJ20021	0.75	MIR1255A	0.56	CISD2	0.48	H2AFZ	0.45	LOC102723704	0.44	UBE2D3	0.33	DNAJB14	0.33	SLC39A8	0.32	LAMTOR3	0.26
Breast_SE_1505	CENPE	0.44	MIR1255A	0.42	TET2	0.37	BDH2	0.33	CISD2	0.26	TACR3	0.24	SLC9B1	0.18	UBE2D3	0.15	MANBA	0.15	FLJ20021	0.14
Breast_SE_1506	CENPE	0.44	MIR1255A	0.43	TET2	0.37	BDH2	0.34	CISD2	0.26	TACR3	0.23	SLC9B1	0.18	MANBA	0.15	FLJ20021	0.15	UBE2D3	0.14
Breast_SE_1507	ARHGEF38	0.73	ARHGEF38-IT1	0.62	CXXC4	0.56	LOC101929529	0.46	HADH	0.43	NPNT	0.42	TACR3	0.4	PPA2	0.36	GSTCD	0.32	TET2	0.29
Breast_SE_1509	PAPSS1	0.8	HADH	0.53	TBCK	0.42	SEC24B-AS1	0.34	LOC101929577	0.28	ETNPPL	0.18	LEF1-AS1	0.17	LOC101929595	0.14	LEF1	0.11	CYP2U1	0.1
Breast_SE_1511	ELOVL6	0.63	SEC24B	0.5	RPL34	0.36	GAR1	0.33	SEC24B-AS1	0.14	OSTC	0.06	RPL34-AS1	0.06	ENPEP	0.05	RRH	0.01	ETNPPL	0
Breast_SE_1512	CAMK2D	0.79	ANK2	0.38	ARSJ	0.33	ZGRF1	0.33	TIFA	0.27	MIR302B	0.27	LARP7	0.16	NDST4	0.15	MIR302A	0.15	UGT8	0.13
Breast_SE_1513	ARSJ	0.67	CAMK2D	0.38	MIR302B	0.35	ANK2	0.29	MIR302D	0.28	MIR302A	0.27	ALPK1	0.25	NEUROG2	0.25	ZGRF1	0.21	MIR367	0.18
Breast_SE_1514	MIR1973	0	NDST4	0	MIR577	0	UGT8	0	TRAM1L1	0	ARSJ	0	LINC01378	0	CAMK2D	0	NDST3	0	MIR1243	0
Breast_SE_1519	BBS7	0.65	NUDT6	0.6	ANXA5	0.57	BBS12	0.52	FGF2	0.49	TRPC3	0.46	EXOSC9	0.42	PP12613	0.35	TMEM155	0.3	IL21-AS1	0.25
Breast_SE_1520	NUDT6	0.43	PP12613	0.38	TRPC3	0.33	BBS7	0.32	TMEM155	0.32	ANXA5	0.3	FGF2	0.3	IL21-AS1	0.25	KIAA1109	0.24	BBS12	0.22
Breast_SE_1521	FGF2	0.61	SPATA5	0.58	NUDT6	0.58	BBS7	0.47	TRPC3	0.41	CETN4P	0.4	ANXA5	0.38	BBS12	0.37	IL21	0.33	PP12613	0.32
Breast_SE_1522	NUDT6	0.8	FGF2	0.76	SPATA5	0.63	BBS7	0.49	ANXA5	0.41	BBS12	0.36	PP12613	0.33	TRPC3	0.32	TMEM155	0.26	IL21-AS1	0.21
Breast_SE_1523	SPRY1	0.85	LINC01091	0.6	BBS12	0.36	TRPC3	0.3	IL21	0.26	IL21-AS1	0.26	KIAA1109	0.26	EXOSC9	0.16	ADAD1	0.16	BBS7	0.1
Breast_SE_1525	LINC01091	0.62	PP12613	0.37	SPRY1	0.37	CETN4P	0.31	ADAD1	0.27	IL21-AS1	0.24	IL21	0.23	TRPC3	0.22	CCNA2	0.19	BBS12	0.03
Breast_SE_1526	IL21-AS1	0.72	IL21	0.72	ADAD1	0.55	LINC01091	0.51	BBS12	0.37	TRPC3	0.2	CCNA2	0.16	IL2	0.13	PP12613	0.1	ANKRD50	0.09
Breast_SE_1530	JADE1	0.75	FAT4	0.6	PGRMC2	0.43	SPATA5	0.34	SCLT1	0.32	INTU	0.32	SPRY1	0.17	LARP1B	0.16	ANKRD50	0.11	LOC101927359	0.1
Breast_SE_1531	PCDH10	0.87	LOC101927359	0.84	PABPC4L	0.43	PCDH18	0.26	PLK4	0.07	LINC00499	0	HSPA4L	0	LINC00613	0	LINC00616	-0.1	MFSD8	-0.1
Breast_SE_1533	NDUFC1	0.8	ELMOD2	0.61	SCOC-AS1	0.59	TBC1D9	0.56	MAML3	0.5	MGST2	0.4	ELF2	0.37	SCOC	0.3	CLGN	0.28	RAB33B	0.24
Breast_SE_1534	ELF2	0.78	TNRC18P1	0.57	MAML3	0.46	CLGN	0.4	RAB33B	0.36	TBC1D9	0.35	ELMOD2	0.28	NDUFC1	0.24	SETD7	0.12	MGST2	0.11
Breast_SE_1535	ELF2	0.74	TBC1D9	0.61	MAML3	0.57	RAB33B	0.54	NDUFC1	0.49	TNRC18P1	0.49	RNF150	0.43	CLGN	0.42	SETD7	0.34	ELMOD2	0.34
Breast_SE_1536	ELF2	0.75	TBC1D9	0.58	RAB33B	0.56	MAML3	0.53	TNRC18P1	0.5	RNF150	0.47	CLGN	0.43	NDUFC1	0.4	SETD7	0.36	SCOC	0.3
Breast_SE_1537	ELF2	0.75	TBC1D9	0.58	RAB33B	0.56	MAML3	0.53	TNRC18P1	0.5	RNF150	0.47	CLGN	0.43	NDUFC1	0.4	SETD7	0.36	SCOC	0.3
Breast_SE_1538	MAML3	0.8	TBC1D9	0.54	CLGN	0.51	SETD7	0.5	SCOC-AS1	0.39	ZNF330	0.39	MGST2	0.38	ELF2	0.35	NAA15	0.33	NDUFC1	0.29
Breast_SE_1539	MAML3	0.88	CLGN	0.61	TBC1D9	0.49	TNRC18P1	0.48	NDUFC1	0.46	ZNF330	0.45	SETD7	0.41	NAA15	0.39	SCOC-AS1	0.38	SCOC	0.37
Breast_SE_1540	TBC1D9	0.85	MAML3	0.6	TNRC18P1	0.54	NDUFC1	0.45	MGST2	0.42	ELMOD2	0.42	CLGN	0.41	SCOC-AS1	0.38	MGAT4D	0.36	ELF2	0.31
Breast_SE_1542	MGAT4D	0.64	INPP4B	0.46	TBC1D9	0.46	USP38	0.28	GAB1	0.24	TNRC18P1	0.1	SMARCA5-AS1	0.09	SMARCA5	0.07	ELMOD2	0.01	MIR3139	0
Breast_SE_1545	GAB1	0.88	USP38	0.7	LOC101927636	0.6	GUSBP5	0.42	SMAD1	0.42	FREM3	0.4	SMARCA5	0.38	GYPA	0.32	GYPE	0.2	SMARCA5-AS1	0.15
Breast_SE_1546	SMAD1	0.77	SMAD1-AS2	0.61	LINC01095	0.39	GYPE	0.36	GYPB	0.27	POU4F2	0.24	MMAA	0.22	LOC101927636	0.21	GYPA	0.18	TTC29	0.16
Breast_SE_1547	ZNF827	0.78	MMAA	0.49	GYPA	0.36	ANAPC10	0.29	SMAD1	0.25	HHIP-AS1	0.25	SLC10A7	0.2	GYPB	0.17	POU4F2	0.11	HHIP	0.1
Breast_SE_1548	ZNF827	0.71	SMAD1	0.38	MMAA	0.38	SLC10A7	0.26	LINC01095	0.23	ANAPC10	0.19	ABCE1	0.16	HHIP-AS1	0.14	TTC29	0.13	LSM6	0.12
Breast_SE_1549	ARHGAP10	0.78	PRMT9	0.68	LINC01095	0.55	TMEM184C	0.53	LRBA	0.44	NR3C2	0.31	SLC10A7	0.26	MMAA	0.12	ZNF827	0.09	POU4F2	0.08
Breast_SE_1551	DCLK2	0.71	SH3D19	0.2	MIR4453	0.14	NR3C2	0.11	PRMT9	0.02	TIGD4	0.01	MIR4799	0	GATB	0	MIR3140	0	ARHGAP10	-0.1
Breast_SE_1552	LRBA	0.66	FHDC1	0.52	ARFIP1	0.43	TIGD4	0.35	FAM160A1	0.35	LOC729870	0.32	GATB	0.26	MIR4453	0.24	TRIM2	0.24	MND1	0.23
Breast_SE_1556	FHDC1	0.88	LOC729870	0.75	ARFIP1	0.58	FBXW7	0.58	FAM160A1	0.51	TRIM2	0.26	TIGD4	0.19	MIR4453	0.18	GATB	0.11	FGA	0.1
Breast_SE_1558	TRIM2	0.66	LOC729870	0.44	MIR3140	0.39	TIGD4	0.36	FGA	0.33	PLRG1	0.24	FHDC1	0.23	MND1	0.22	ARFIP1	0.18	DCHS2	0.17
Breast_SE_1559	FHDC1	0.65	LOC729870	0.58	FBXW7	0.54	LRAT	0.5	ARFIP1	0.5	TRIM2	0.34	MND1	0.22	TMEM154	0.22	MIR4453	0.2	FGA	0.04
Breast_SE_1565	PDGFC	0.76	GLRB	0.54	CTSO	0.45	C4orf46	0.36	GUCY1B3	0.29	C4orf45	0.26	RXFP1	0.25	NPY2R	0.18	RBM46	0.17	GRIA2	0.17
Breast_SE_1576	DDX60L	0.64	PALLD	0.6	KLHL2	0.42	LOC101928131	0.4	TLL1	0.39	CLCN3	0.38	NEK1	0.37	SPOCK3	0.36	DDX60	0.36	LINC01179	0.35
Breast_SE_1577	PALLD	0.74	CBR4	0.55	DDX60L	0.53	CPE	0.42	LOC101928131	0.41	DDX60	0.29	LINC01179	0.29	TLL1	0.27	CLCN3	0.27	SPOCK3	0.23
Breast_SE_1578	CBR4	0.59	CLCN3	0.5	CPE	0.45	MFAP3L	0.4	NEK1	0.34	PALLD	0.29	DDX60L	0.24	SH3RF1	0.22	LOC101928131	0.16	LINC01179	0.08
Breast_SE_1579	SH3RF1	0.74	CLCN3	0.59	DDX60L	0.49	DDX60	0.46	NEK1	0.28	PALLD	0.24	SPOCK3	0.21	CBR4	0.07	TLL1	0.04	AADAT	0.01
Breast_SE_1583	GALNT7	0.55	CEP44	0.45	HMGB2	0.38	LOC101930370	0.35	ADAM29	0.25	HPGD	0.21	SAP30	0.17	MIR548T	0.09	GLRA3	0.05	LOC101928314	0
Breast_SE_1584	HAND2	0.87	HAND2-AS1	0.77	SCRG1	0.73	GPM6A	0.36	LOC101928551	0.22	FBXO8	0.18	HPGD	0.03	LOC101928314	0	MIR4276	0	LOC101928590	0
Breast_SE_1585	NEIL3	0.58	CEP44	0.47	FBXO8	0.43	AGA	0.42	VEGFC	0.36	SPATA4	0.32	SPCS3	0.28	WDR17	0.24	HAND2	0.02	LOC101928590	0
Breast_SE_1586	VEGFC	0.9	SPCS3	0.55	SPATA4	0.51	ASB5	0.38	NEIL3	0.3	WDR17	0.26	CEP44	0.24	FBXO8	0.19	AGA	0.17	LOC101928551	0.14
Breast_SE_1590	WWC2	0.89	CLDN22	0.77	WWC2-AS2	0.77	DCTD	0.68	LOC389247	0.55	PRIMPOL	0.37	CDKN2AIP	0.34	ENPP6	0.31	TENM3	0.26	FAM92A1P2	0.24
Breast_SE_1591	TRAPPC11	0.65	ING2	0.6	CENPU	0.55	PRIMPOL	0.54	CDKN2AIP	0.47	LOC389247	0.38	RWDD4	0.37	CLDN22	0.37	WWC2-AS2	0.35	WWC2	0.31
Breast_SE_1592	ING2	0.56	CDKN2AIP	0.51	TRAPPC11	0.47	CENPU	0.44	PRIMPOL	0.39	RWDD4	0.34	LOC389247	0.3	CASP3	0.28	IRF2	0.27	CLDN22	0.23
Breast_SE_1593	ING2	0.52	SLED1	0.44	IRF2	0.32	RWDD4	0.32	SLC25A4	0.29	CENPU	0.28	ACSL1	0.26	CFAP97	0.25	CDKN2AIP	0.22	CASP3	0.21
Breast_SE_1594	ACSL1	0.84	SLED1	0.55	LINC01093	0.55	CCDC110	0.43	HELT	0.32	CENPU	0.26	CFAP97	0.13	PDLIM3	0.12	ENPP6	0.07	MIR4455	0
Breast_SE_1596	SORBS2	0.73	SLC25A4	0.46	CFAP97	0.45	HELT	0.39	LRP2BP	0.38	PDLIM3	0.35	ANKRD37	0.35	C4orf47	0.34	FAM149A	0.34	UFSP2	0.33
Breast_SE_1597	UFSP2	0.52	FLJ38576	0.51	CFAP97	0.49	SLC25A4	0.45	ANKRD37	0.44	SNX25	0.3	TLR3	0.24	LRP2BP	0.19	FAT1	0.05	CYP4V2	0.01
Breast_SE_1599	FAT1	0.77	TLR3	0.51	CFAP97	0.34	UFSP2	0.32	FAM149A	0.31	ANKRD37	0.31	FLJ38576	0.3	SORBS2	0.3	CYP4V2	0.26	LRP2BP	0.26
Breast_SE_1601	DBET	0.53	F11	0.51	MTNR1A	0.47	FLJ38576	0.46	FAT1	0.34	FAM149A	0.32	SORBS2	0.31	ZFP42	0.27	TRIML2	0.21	F11-AS1	0.16
Breast_SE_1603	FLJ38576	0.49	FRG1	0.39	FRG2	0.29	TRIML2	0.28	FAM149A	0.28	SORBS2	0.28	F11-AS1	0.21	FAT1	0.19	MTNR1A	0.17	F11	0.14
Breast_SE_1604	PLEKHG4B	0.81	TPPP	0.51	NKD2	0.32	LOC100996325	0.3	LRRC14B	0.29	SLC9A3	0.26	ZDHHC11B	0.25	SLC12A7	0.22	LOC100506688	0.21	ZDHHC11	0
Breast_SE_1605	NKD2	0.39	PLEKHG4B	0.39	LOC100506688	0.33	LRRC14B	0.25	AHRR	0.25	SLC12A7	0.22	EXOC3	0.2	ZDHHC11	0.19	SLC9A3	0.16	BRD9	0.15
Breast_SE_1606	PDCD6	0.48	EXOC3	0.47	LRRC14B	0.43	SDHA	0.4	SLC12A7	0.38	ZDHHC11	0.35	ZDHHC11B	0.27	PLEKHG4B	0.26	PP7080	0.24	BRD9	0.22
Breast_SE_1607	EXOC3	0.71	PDCD6	0.63	SDHA	0.57	PP7080	0.56	CCDC127	0.55	ZDHHC11	0.44	TRIP13	0.42	ZDHHC11B	0.34	BRD9	0.33	LRRC14B	0.31
Breast_SE_1608	AHRR	0.7	NKD2	0.49	BRD9	0.48	TRIP13	0.37	EXOC3	0.37	SLC9A3	0.28	CEP72	0.2	SLC12A7	0.2	PDCD6	0.19	LOC100996325	0.17
Breast_SE_1609	EXOC3	0.66	BRD9	0.64	TRIP13	0.51	PP7080	0.44	MIR4635	0.26	NKD2	0.24	SLC6A18	0.22	SLC12A7	0.17	LOC100506688	0.13	CTD-3080P12.3	0.12
Breast_SE_1610	NKD2	0.73	LOC100506688	0.47	BRD9	0.46	TRIP13	0.4	CLPTM1L	0.39	MIR4635	0.27	SLC12A7	0.23	SLC6A18	0.19	SLC6A19	0.16	SLC9A3	0.12
Breast_SE_1611	SLC12A7	0.86	MIR4635	0.51	ZDHHC11B	0.37	NKD2	0.35	TPPP	0.33	LOC100996325	0.31	CTD-3080P12.3	0.29	SLC6A3	0.26	CEP72	0.18	SLC6A19	0.13
Breast_SE_1612	SDHAP3	0.48	LOC728613	0.48	CLPTM1L	0.41	ZDHHC11	0.39	LPCAT1	0.34	SLC6A3	0.29	CTD-3080P12.3	0.22	LINC01511	0.19	SLC12A7	0.18	TRIP13	0.17
Breast_SE_1613	LPCAT1	0.6	LOC728613	0.58	NDUFS6	0.55	MRPL36	0.46	CLPTM1L	0.44	SDHAP3	0.38	NKD2	0.31	LINC01511	0.26	MIR6075	0.24	SLC6A3	0.23
Breast_SE_1614	MRPL36	0.65	LPCAT1	0.4	NDUFS6	0.4	CLPTM1L	0.36	LOC728613	0.3	MIR4635	0.24	SLC6A18	0.23	MIR6075	0.11	SLC12A7	0.11	LINC01511	0.07
Breast_SE_1615	IRX4	0.93	CTD-2194D22.4	0.79	MIR4277	0.32	TERT	0.23	MIR6075	0.19	SLC6A19	0.13	LPCAT1	0.07	CTD-3080P12.3	0.02	MIR4457	0	CLPTM1L	0
Breast_SE_1617	C5orf38	0.68	IRX2	0.62	MIR6075	0.25	NDUFS6	0.16	IRX1	0.04	CLPTM1L	0.03	LINC01377	0	LINC01017	0	MIR4457	0	LPCAT1	0
Breast_SE_1618	IRX2	0.86	C5orf38	0.81	MRPL36	0.47	MIR6075	0.41	CLPTM1L	0.39	IRX4	0.33	IRX1	0.28	LINC01511	0.25	MIR4277	0.18	CTD-2194D22.4	0.17
Breast_SE_1619	C5orf38	0.44	LINC01511	0.39	IRX2	0.37	SDHAP3	0.37	MIR4277	0.32	LOC728613	0.31	SLC6A3	0.28	LOC100506858	0.26	CLPTM1L	0.24	IRX4	0.17
Breast_SE_1620	IRX1	0.96	IRX4	0.44	CTD-2194D22.4	0.42	CTD-2297D10.2	0.27	LINC01020	0.27	MRPL36	0.24	IRX2	0.19	ICE1	0.16	C5orf38	0.12	NDUFS6	0.01
Breast_SE_1622	ADAMTS16	0.51	LINC01019	0.41	LINC01018	0.31	UBE2QL1	0.22	ICE1	0.13	MED10	0.02	LINC01017	0	LINC01377	0	SRD5A1	0	IRX1	0
Breast_SE_1623	ICE1	0.56	NSUN2	0.55	SRD5A1	0.49	FASTKD3	0.47	MED10	0.43	MTRR	0.42	PAPD7	0.39	MIR4278	0.29	UBE2QL1	0.2	C5orf49	0.15
Breast_SE_1624	ICE1	0.72	MTRR	0.72	NSUN2	0.65	FASTKD3	0.59	SRD5A1	0.54	PAPD7	0.54	MED10	0.51	MIR4278	0.4	LINC01018	0.34	C5orf49	0.28
Breast_SE_1625	ADCY2	0.54	C5orf49	0.14	MTRR	0.13	SRD5A1	0.04	LINC01018	0.01	FASTKD3	0.01	UBE2QL1	0	MIR4636	0	MIR4278	0	NSUN2	0
Breast_SE_1628	SEMA5A	0.83	SNHG18	0.74	SNORD123	0.44	CCT5	0.4	TAS2R1	0.35	DAP	0.23	CMBL	0.22	MTRR	0.16	FAM173B	0.12	FASTKD3	0.07
Breast_SE_1629	SEMA5A	0.84	SNHG18	0.73	CCT5	0.43	SNORD123	0.42	TAS2R1	0.36	DAP	0.25	CMBL	0.24	MTRR	0.18	FAM173B	0.13	FASTKD3	0.11
Breast_SE_1630	C5orf49	0.5	CMBL	0.36	DAP	0.31	MIR4458HG	0.29	CTNND2	0.25	FASTKD3	0.23	LINC01194	0.22	MIR4458	0.19	MTRR	0.17	FAM173B	0.15
Breast_SE_1631	FASTKD3	0.73	FAM173B	0.71	CCT5	0.64	C5orf49	0.56	MTRR	0.53	DAP	0.47	LINC01194	0.4	CMBL	0.4	MIR4458HG	0.26	CTNND2	0.21
Breast_SE_1632	CMBL	0.63	MIR4458HG	0.59	C5orf49	0.52	MTRR	0.46	MIR4458	0.46	FAM173B	0.44	ROPN1L	0.43	ANKRD33B	0.41	ROPN1L-AS1	0.4	CCT5	0.39
Breast_SE_1633	ANKRD33B	0.84	ROPN1L	0.61	ROPN1L-AS1	0.47	MTRR	0.36	CCT5	0.28	FAM173B	0.25	FASTKD3	0.24	SNHG18	0.18	LINC01194	0.12	DAP	0.11
Breast_SE_1634	MTRR	0.65	DAP	0.6	ROPN1L	0.45	SNORD123	0.39	ROPN1L-AS1	0.39	CCT5	0.33	FASTKD3	0.3	SNHG18	0.29	CTNND2	0.23	ANKRD33B	0.18
Breast_SE_1636	DNAH5	0.66	TRIO	0.58	BASP1	0.53	MYO10	0.32	ANKRD33B	0.18	LINC01194	0.18	ANKH	0.18	LOC100130744	0.17	FBXL7	0.15	DAP	0.13
Breast_SE_1638	TRIO	0.77	BASP1	0.65	DNAH5	0.59	ZNF622	0.44	MYO10	0.37	ANKRD33B	0.36	FBXL7	0.3	ANKH	0.26	OTULIN	0.25	LOC100130744	0.25
Breast_SE_1640	ANKH	0.72	LOC100130744	0.63	MIR4637	0.48	MYO10	0.31	TRIO	0.16	ANKRD33B	0.13	FBXL7	0.07	LINC01194	0.05	OTULIN	0.04	FAM105A	0.02
Breast_SE_1641	LOC100130744	0.48	ANKH	0.47	TRIO	0.4	FBXL7	0.37	FAM105A	0.31	MYO10	0.25	BASP1	0.2	ZNF622	0.08	OTULIN	0.01	MIR887	0
Breast_SE_1643	LINC01194	0.55	MYO10	0.49	DNAH5	0.49	LOC285696	0.46	BASP1	0.4	TRIO	0.36	CTD-2350J17.1	0.19	OTULIN	0.18	MIR4637	0.17	ANKH	0.15
Breast_SE_1644	BASP1	0.94	TRIO	0.53	LOC285696	0.41	DNAH5	0.4	ZNF622	0.38	LINC01194	0.36	GUSBP1	0.36	FBXL7	0.34	CDH12	0.23	LOC101929524	0.2
Breast_SE_1646	GOLPH3	0.71	C5orf22	0.7	C1QTNF3-AMACR	0.68	AMACR	0.68	MTMR12	0.65	SUB1	0.64	ZFR	0.48	NPR3	0.46	RXFP3	0.35	SLC45A2	0.26
Breast_SE_1647	MTMR12	0.67	GOLPH3	0.57	C5orf22	0.51	MIR4279	0.48	PDZD2	0.43	ZFR	0.37	C1QTNF3-AMACR	0.36	SUB1	0.36	C1QTNF3	0.34	AMACR	0.34
Breast_SE_1648	MTMR12	0.53	ZFR	0.53	NPR3	0.51	GOLPH3	0.45	SUB1	0.42	RAI14	0.39	DROSHA	0.38	C5orf22	0.33	C1QTNF3	0.3	MIR579	0.24
Breast_SE_1649	RXFP3	0.55	NPR3	0.23	RAI14	0.13	CDH6	0.09	MIR7641-2	0	SUB1	0	ADAMTS12	0	GOLPH3	-0.1	C1QTNF3	-0.1	MTMR12	-0.1
Breast_SE_1651	NPR3	0.82	SLC45A2	0.45	C1QTNF3	0.43	MIR579	0.39	C5orf22	0.29	SUB1	0.29	CDH6	0.28	GOLPH3	0.26	MTMR12	0.24	C1QTNF3-AMACR	0.22
Breast_SE_1652	ADAMTS12	0.52	RXFP3	0.41	RAI14	0.31	SLC45A2	0.23	TARS	0.19	NPR3	0.18	SUB1	0.01	MIR7641-2	0	AMACR	0	C1QTNF3-AMACR	0
Breast_SE_1653	ADAMTS12	0.82	TARS	0.44	RAI14	0.4	SLC45A2	0.35	RXFP3	0.32	NPR3	0.28	ZFR	0.26	C1QTNF3	0.16	AMACR	0.13	MTMR12	0.13
Breast_SE_1654	TTC23L	0.56	C1QTNF3-AMACR	0.5	PRLR	0.5	AMACR	0.48	RAD1	0.46	AGXT2	0.44	UGT3A1	0.36	C1QTNF3	0.36	DNAJC21	0.36	SPEF2	0.34
Breast_SE_1655	RAI14	0.87	IL7R	0.56	TARS	0.5	ADAMTS12	0.4	CAPSL	0.29	BRIX1	0.25	SLC45A2	0.21	UGT3A1	0.21	DNAJC21	0.18	RXFP3	0.15
Breast_SE_1656	C1QTNF3-AMACR	0.64	AMACR	0.64	DNAJC21	0.55	LMBRD2	0.53	TTC23L	0.46	RAD1	0.42	SPEF2	0.4	SLC45A2	0.28	PRLR	0.26	BRIX1	0.24
Breast_SE_1657	PRLR	0.9	AGXT2	0.54	SPEF2	0.51	LMBRD2	0.42	MIR580	0.31	UGT3A1	0.31	TTC23L	0.28	C1QTNF3-AMACR	0.26	AMACR	0.25	C1QTNF3	0.21
Breast_SE_1660	SLC1A3	0.61	AGXT2	0.39	RANBP3L	0.32	LMBRD2	0.31	NIPBL	0.21	NUP155	0.19	MIR580	0.15	GDNF-AS1	0.14	NADK2	0.12	UGT3A2	0.11
Breast_SE_1661	SLC1A3	0.65	RANBP3L	0.32	MIR580	0.25	LMBRD2	0.22	PRLR	0.18	UGT3A1	0.18	C5orf42	0.17	NADK2	0.15	CAPSL	0.12	UGT3A2	0.08
Breast_SE_1662	WDR70	0.67	NIPBL	0.6	NADK2	0.59	NUP155	0.55	SKP2	0.45	SPEF2	0.35	RANBP3L	0.32	CAPSL	0.32	C5orf42	0.28	UGT3A2	0.23
Breast_SE_1663	GDNF	0.95	GDNF-AS1	0.74	DAB2	0.62	C5orf42	0.52	OSMR	0.51	OSMR-AS1	0.5	LIFR	0.38	LIFR-AS1	0.2	RICTOR	0.19	WDR70	0.17
Breast_SE_1664	LIFR	0.77	OSMR	0.68	DAB2	0.52	OSMR-AS1	0.49	GDNF	0.48	EGFLAM	0.39	NUP155	0.36	GDNF-AS1	0.36	C5orf42	0.31	LINC01265	0.25
Breast_SE_1665	OSMR	0.84	OSMR-AS1	0.66	LIFR	0.56	DAB2	0.55	PTGER4	0.51	EGFLAM	0.31	LINC01265	0.3	GDNF	0.27	LINC00603	0.27	GDNF-AS1	0.27
Breast_SE_1666	LIFR	0.43	DAB2	0.36	OSMR-AS1	0.33	LINC00603	0.32	OSMR	0.31	LOC100506548	0.3	RICTOR	0.24	WDR70	0.24	PTGER4	0.2	GDNF	0.15
Breast_SE_1667	LINC00603	0.57	GDNF-AS1	0.32	OSMR	0.3	DAB2	0.2	GDNF	0.17	PTGER4	0.17	OSMR-AS1	0.09	EGFLAM-AS4	0	C9	0	LIFR	-0.1
Breast_SE_1668	DAB2	0.69	OSMR	0.47	OSMR-AS1	0.44	LINC00603	0.43	PTGER4	0.27	LIFR-AS1	0.25	LINC01265	0.15	PRKAA1	0.14	MIR3650	0.12	TTC33	0.1
Breast_SE_1669	FBXO4	0.35	TTC33	0.27	C5orf51	0.25	PRKAA1	0.24	LINC00603	0.23	OXCT1-AS1	0.22	PLCXD3	0.15	RPL37	0.1	OXCT1	0.1	GHR	0.1
Breast_SE_1670	OXCT1-AS1	0.63	OXCT1	0.53	TTC33	0.46	C5orf51	0.4	FBXO4	0.34	RPL37	0.33	PRKAA1	0.21	LOC100506548	0.2	C7	0.14	GHR	0.14
Breast_SE_1671	CCDC152	0.86	GHR	0.79	LOC153684	0.67	ANXA2R	0.66	LOC100506639	0.63	LOC100132356	0.6	FBXO4	0.55	PAIP1	0.54	C5orf51	0.42	C5orf34	0.28
Breast_SE_1673	LOC100506639	0.4	LOC648987	0.38	C5orf34	0.32	OXCT1-AS1	0.3	FLJ32255	0.28	C5orf51	0.2	LOC100132356	0.17	LOC153684	0.14	ZNF131	0.06	NNT	0.06
Breast_SE_1674	LOC100506639	0.68	ANXA2R	0.66	FBXO4	0.63	GHR	0.59	LOC153684	0.55	C5orf51	0.53	PAIP1	0.51	LOC648987	0.5	ZNF131	0.49	CCDC152	0.42
Breast_SE_1675	CCL28	0.47	CCDC152	0.17	LOC101926960	0.16	GHR	0.11	LOC153684	0.03	C5orf34	0	FLJ32255	0	FGF10-AS1	0	PAIP1	0	LOC100506639	-0.1
Breast_SE_1677	MRPS30	0.7	GHR	0.69	ANXA2R	0.69	CCDC152	0.6	HCN1	0.47	LOC153684	0.46	LOC100506639	0.42	PAIP1	0.38	LOC100132356	0.21	C5orf34	0.2
Breast_SE_1678	ITGA1	0.45	LOC257396	0.44	LOC102467080	0.28	MOCS2	0.24	PELO	0.16	ARL15	0.15	HSPB3	0.12	NDUFS4	0.12	GZMK	0.05	PARP8	0.04
Breast_SE_1679	ITGA2	0.64	LOC257396	0.56	ITGA1	0.5	PELO	0.43	GZMK	0.33	MOCS2	0.29	FST	0.25	ISL1	0.18	GZMA	0.16	LOC642366	0.15
Breast_SE_1681	FST	0.53	ITGA1	0.44	LOC257396	0.43	GPX8	0.41	GZMK	0.38	PELO	0.29	NDUFS4	0.28	GZMA	0.27	ITGA2	0.27	HSPB3	0.23
Breast_SE_1683	CCNO	0.79	MCIDAS	0.73	CDC20B	0.21	DDX4	0.18	SKIV2L2	0.06	GZMK	0.06	SNX18	0.05	SLC38A9	0.02	ESM1	0.02	MIR449C	0
Breast_SE_1684	DHX29	0.58	FLJ31104	0.46	SLC38A9	0.38	IL31RA	0.37	IL6ST	0.33	GPX8	0.31	SKIV2L2	0.18	RNF138P1	0.17	GZMK	0.12	GZMA	0.11
Breast_SE_1685	FLJ31104	0.69	GPX8	0.38	IL6ST	0.26	ANKRD55	0.23	IL31RA	0.17	RNF138P1	0.12	MAP3K1	0.1	GZMA	0.1	MCIDAS	0	MIR5687	0
Breast_SE_1686	MAP3K1	0.81	MIER3	0.45	DDX4	0.33	SETD9	0.27	FLJ31104	0.2	GPBP1	0.14	CCNO	0.14	MCIDAS	0.14	MIR5687	0	MIR449C	0
Breast_SE_1687	MAP3K1	0.86	MIER3	0.73	GPBP1	0.47	SETD9	0.46	DDX4	0.36	CCNO	0.33	FLJ31104	0.28	MCIDAS	0.2	PLK2	0.15	DHX29	0.06
Breast_SE_1688	MIER3	0.42	GPBP1	0.38	MAP3K1	0.28	FLJ31104	0.27	RNF138P1	0.26	LINCR-0003	0.26	PDE4D	0.2	GAPT	0.18	PLK2	0.1	LOC101928505	0.06
Breast_SE_1689	LINCR-0003	0.57	ACTBL2	0.52	GAPT	0.4	FLJ31104	0.31	LOC101928505	0.28	IL31RA	0.22	RNF138P1	0.22	IL6ST	0.11	DDX4	0.01	PDE4D	0.01
Breast_SE_1690	ACTBL2	0.62	LINCR-0003	0.52	FLJ31104	0.38	ANKRD55	0.3	LOC101928505	0.29	GAPT	0.21	RNF138P1	0.2	IL31RA	0.18	IL6ST	0.14	DDX4	0.09
Breast_SE_1692	PLK2	0.41	FLJ31104	0.4	DDX4	0.27	SLC38A9	0.23	PDE4D	0.2	ACTBL2	0.16	IL31RA	0.15	GAPT	0.11	ANKRD55	0.06	MAP3K1	0.06
Breast_SE_1693	MAP3K1	0.6	GPBP1	0.41	SETD9	0.39	RAB3C	0.37	PLK2	0.29	PDE4D	0.21	FLJ31104	0.06	MIR548AE2	0	MIR582	0	PART1	0
Breast_SE_1694	FLJ31104	0.29	RAB3C	0.28	MAP3K1	0.25	PLK2	0.22	PDE4D	0.2	GPBP1	0.19	DEPDC1B	0.18	SETD9	0.15	GAPT	0.12	ACTBL2	0.03
Breast_SE_1695	PLK2	0.52	ERCC8	0.47	NDUFAF2	0.34	FLJ31104	0.28	DEPDC1B	0.25	MIER3	0.25	ELOVL7	0.18	MAP3K1	0.18	PDE4D	0.07	RAB3C	0.05
Breast_SE_1696	PDE4D	0.46	NDUFAF2	0.34	ZSWIM6	0.27	GAPT	0.27	DEPDC1B	0.26	LOC101928505	0.23	ERCC8	0.16	SETD9	0.1	MIR548AE2	0	MIR582	0
Breast_SE_1697	PDE4D	0.37	PLK2	0.27	RAB3C	0.22	PART1	0.2	LINCR-0003	0.14	GPBP1	0.09	KIF2A	0.04	ELOVL7	0.01	MIR582	0	MIR548AE2	0
Breast_SE_1698	PART1	0.9	KIF2A	0.13	LRRC70	0.03	SMIM15	0	MIR582	0	MIR548AE2	0	ELOVL7	0	PDE4D	0	RAB3C	0	GAPT	0
Breast_SE_1699	ZSWIM6	0.7	GAPT	0.39	NDUFAF2	0.38	DIMT1	0.38	IPO11-LRRC70	0.28	HTR1A	0.25	SMIM15	0.24	IPO11	0.23	ERCC8	0.19	DEPDC1B	0.11
Breast_SE_1702	HTR1A	0.6	ADAMTS6	0.57	TRIM23	0.43	PPWD1	0.29	IPO11	0.29	IPO11-LRRC70	0.28	NLN	0.27	CWC27	0.24	CENPK	0.17	FAM159B	0.15
Breast_SE_1703	ADAMTS6	0.83	SGTB	0.74	HTR1A	0.56	IPO11-LRRC70	0.5	SREK1IP1	0.5	PPWD1	0.37	CWC27	0.35	TRIM23	0.35	CENPK	0.35	FAM159B	0.34
Breast_SE_1704	HTR1A	0.47	FAM159B	0.31	RGS7BP	0.26	NLN	0.26	TRIM23	0.24	SGTB	0.21	RNF180	0.21	LOC101928858	0.18	CENPK	0.12	PPWD1	0.1
Breast_SE_1705	MAST4	0.43	CCNB1	0.19	LOC100303749	0.16	ADAMTS6	0.1	CD180	0.07	CENPH	0	NLN	0	SGTB	0	FAM159B	0	RGS7BP	-0.1
Breast_SE_1706	MAST4	0.76	CCNB1	0.32	PIK3R1	0.28	PPWD1	0.26	ADAMTS6	0.15	LOC101928858	0.14	SREK1	0.1	CENPK	0.1	SLC30A5	0.08	LOC100303749	0.06
Breast_SE_1707	LOC101928858	0.46	CCNB1	0.43	PIK3R1	0.42	SLC30A5	0.26	SREK1	0.19	MAST4	0.16	NLN	0.15	CENPK	0.09	SGTB	0.08	ADAMTS6	0.07
Breast_SE_1709	PIK3R1	0.78	SLC30A5	0.34	CCDC125	0.3	LOC101928858	0.29	MARVELD2	0.23	GTF2H2B	0.2	OCLN	0.19	CCNB1	0.16	GUSBP3	0.16	MAST4	0.15
Breast_SE_1710	MARVELD2	0.51	PIK3R1	0.46	OCLN	0.39	SMA4	0.31	LOC101928858	0.22	GTF2H2B	0.22	GUSBP3	0.18	CCDC125	0.17	LOC101928924	0	SLC30A5	0
Breast_SE_1711	PIK3R1	0.44	GUSBP3	0.34	SMA4	0.31	MARVELD2	0.3	CCDC125	0.23	OCLN	0.22	GTF2H2B	0.21	MRPS36	0.08	SLC30A5	0.06	LOC101928924	0
Breast_SE_1712	OCLN	0.78	SMA4	0.65	CCDC125	0.54	MARVELD2	0.49	RAD17	0.23	GTF2H2B	0.2	AK6	0.04	SERF1B	0.02	LOC101928924	0	MRPS36	0
Breast_SE_1713	MAP1B	0.86	LOC102503427	0.31	FOXD1	0.31	ZNF366	0.3	BTF3	0.2	MIR4804	0.19	TMEM171	0.19	PTCD2	0.17	MRPS27	0.08	BDP1	0.02
Breast_SE_1714	MAP1B	0.53	ZNF366	0.45	PTCD2	0.44	TNPO1	0.42	FOXD1	0.36	LOC102503427	0.28	MRPS27	0.22	MIR4804	0.14	BTF3	0.08	BDP1	0.08
Breast_SE_1716	MAP1B	0.59	TMEM171	0.54	ARHGEF28	0.52	TNPO1	0.34	BTF3	0.27	FOXD1	0.24	MRPS27	0.24	ENC1	0.18	PTCD2	0.18	FCHO2	0.15
Breast_SE_1717	FOXD1	0.78	ARHGEF28	0.37	TNPO1	0.28	HEXB	0.22	LINC01333	0.19	PTCD2	0.19	ZNF366	0.19	MRPS27	0.17	BTF3	0.15	TMEM171	0.12
Breast_SE_1718	ARHGEF28	0.51	GFM2	0.29	UTP15	0.23	TMEM174	0.16	LOC340090	0.16	FOXD1	0.16	HEXB	0.16	TNPO1	0.14	ZNF366	0.13	ENC1	0.1
Breast_SE_1722	HEXB	0.4	ENC1	0.36	ANKRA2	0.29	ARHGEF28	0.21	FOXD1	0.12	LINC01333	0.09	POLK	0.05	LOC340090	0	LINC01335	0	BTF3	0
Breast_SE_1725	IQGAP2	0.69	SV2C	0.53	ZBED3-AS1	0.43	ANKDD1B	0.34	COL4A3BP	0.33	SNORA47	0.31	PDE8B	0.3	ZBED3	0.29	S100Z	0.18	WDR41	0.1
Breast_SE_1726	F2R	0.83	F2RL1	0.47	F2RL2	0.46	POLK	0.42	NCRUPAR	0.31	ANKDD1B	0.3	S100Z	0.26	LOC101929109	0.23	CRHBP	0.21	WDR41	0.07
Breast_SE_1727	F2RL1	0.57	F2R	0.42	F2RL2	0.28	LOC101929154	0.21	CRHBP	0.21	NCRUPAR	0.2	LOC101929109	0.14	S100Z	0.02	SV2C	0	ANKDD1B	0
Breast_SE_1729	LHFPL2	0.78	ARSB	0.48	SCAMP1-AS1	0.33	LOC101929154	0.32	BHMT	0.16	BHMT2	0.14	DMGDH	0.11	WDR41	0.09	SNORA47	0.03	AP3B1	0.01
Breast_SE_1731	ZFYVE16	0.74	MTX3	0.63	JMY	0.62	SERINC5	0.59	CMYA5	0.54	FAM151B	0.51	HOMER1	0.45	CTD-2201I18.1	0.42	LINC01337	0.38	DHFR	0.3
Breast_SE_1732	ZFYVE16	0.58	CMYA5	0.49	MTX3	0.43	CKMT2	0.31	FAM151B	0.29	CTD-2201I18.1	0.28	THBS4	0.28	LINC01337	0.22	SERINC5	0.15	ANKRD34B	0.14
Breast_SE_1733	SSBP2	0.8	CKMT2	0.32	SCARNA18	0.3	CKMT2-AS1	0.25	ATG10	0.23	DHFR	0.2	FAM151B	0.16	LINC01337	0.15	MSH3	0.11	RASGRF2	0.06
Breast_SE_1734	SSBP2	0.68	ATG10	0.36	CKMT2	0.32	CKMT2-AS1	0.32	SCARNA18	0.26	ANKRD34B	0.18	ACOT12	0.16	TMEM167A	0.08	MSH3	0.07	LINC01337	0.07
Breast_SE_1735	VCAN	0.75	EDIL3	0.61	XRCC4	0.29	HAPLN1	0.23	RPS23	0.18	ATP6AP1L	0.11	RASGRF2-AS1	0.1	TMEM167A	0.09	SCARNA18	0.06	CKMT2-AS1	0.05
Breast_SE_1737	EDIL3	0.91	RPS23	0.54	HAPLN1	0.41	VCAN	0.36	ZCCHC9	0.29	LOC101929380	0.23	TMEM167A	0.14	XRCC4	0.12	ACOT12	0.09	ATG10	0.07
Breast_SE_1738	RASA1	0.57	LOC101929380	0.57	POLR3G	0.48	TMEM161B	0.43	CCNH	0.4	EDIL3	0.33	MIR4280	0.23	MBLAC2	0.11	MEF2C	0.06	CETN3	0.01
Breast_SE_1740	COX7C	0.46	LINC00461	0.46	CETN3	0.42	MIR9-2	0.41	TMEM161B-AS1	0.34	MEF2C-AS1	0.28	LOC731157	0.28	NBPF22P	0.23	MEF2C	0.18	MIR4280	0.07
Breast_SE_1741	MEF2C	0.86	MEF2C-AS1	0.79	LINC00461	0.61	MIR9-2	0.49	LYSMD3	0.28	TMEM161B	0.21	ARRDC3	0.19	RASA1	0.11	LOC101929380	0.1	MIR4280	0.04
Breast_SE_1742	LINC00461	0.48	MEF2C	0.48	MEF2C-AS1	0.46	TMEM161B-AS1	0.43	MIR2277	0.37	MIR9-2	0.36	ARRDC3-AS1	0.31	LOC731157	0.26	LYSMD3	0.11	FAM172A	0.09
Breast_SE_1743	LUCAT1	0.48	NR2F1-AS1	0.44	NR2F1	0.37	MEF2C	0.28	ARRDC3	0.27	POLR3G	0.27	MIR9-2	0.22	MEF2C-AS1	0.14	LINC00461	0.12	MBLAC2	0.1
Breast_SE_1744	MIR2277	0.41	ARRDC3	0.38	MEF2C	0.36	LINC00461	0.36	FAM172A	0.35	ARRDC3-AS1	0.33	MEF2C-AS1	0.33	MBLAC2	0.33	KIAA0825	0.31	MIR9-2	0.27
Breast_SE_1746	NR2F1-AS1	0.8	NR2F1	0.78	LUCAT1	0.4	ELL2	0.27	GLRX	0.2	GPR150	0.2	ARRDC3	0.18	RHOBTB3	0.15	MCTP1	0.05	MIR583	0
Breast_SE_1747	RHOBTB3	0.91	SPATA9	0.67	GLRX	0.58	RFESD	0.58	PCSK1	0.22	KIAA0825	0.16	FAM81B	0.14	GPR150	0.11	ELL2	0.09	CAST	0.06
Breast_SE_1748	GLRX	0.56	TTC37	0.49	GPR150	0.46	ELL2	0.44	RFESD	0.4	SPATA9	0.33	KIAA0825	0.3	ARSK	0.29	ERAP2	0.29	MCTP1	0.28
Breast_SE_1749	ELL2	0.56	CAST	0.51	MCTP1	0.48	ERAP1	0.41	RFESD	0.41	SPATA9	0.37	ARSK	0.36	ERAP2	0.26	PCSK1	0.25	GLRX	0.17
Breast_SE_1750	ELL2	0.59	PCSK1	0.5	MCTP1	0.47	ERAP2	0.39	CAST	0.38	ARSK	0.35	GPR150	0.34	RFESD	0.29	SPATA9	0.27	TTC37	0.1
Breast_SE_1751	CAST	0.75	ERAP1	0.52	ELL2	0.37	PCSK1	0.35	MCTP1	0.3	SPATA9	0.24	RFESD	0.22	RHOBTB3	0.22	ARSK	0.14	GPR150	0.12
Breast_SE_1752	LNPEP	0.65	RIOK2	0.39	ARSK	0.3	TTC37	0.25	RGMB-AS1	0.18	LIX1	0.15	FAM81B	0.12	SPATA9	0.09	RFESD	0.07	RHOBTB3	0.06
Breast_SE_1753	ELL2	0.44	RGMB	0.32	RGMB-AS1	0.32	CAST	0.3	ERAP2	0.24	RIOK2	0.22	PCSK1	0.19	GLRX	0.17	FAM174A	0.14	LNPEP	0.1
Breast_SE_1754	RGMB-AS1	0.59	RGMB	0.47	RIOK2	0.42	FAM174A	0.35	CHD1	0.21	LOC100289230	0.18	ERAP1	0.15	LIX1	0.14	LINC01340	0.09	ERAP2	0.06
Breast_SE_1759	FER	0.28	EFNA5	0.22	CAMK4	0.2	WDR36	0.02	TSLP	0	FBXL17	-0.1	STARD4	-0.1	LINC01023	-0.1	LOC285638	-0.1	SLC25A46	-0.1
Breast_SE_1760	FER	0.43	EFNA5	0.25	WDR36	0.2	CAMK4	0.2	STARD4	0.03	LOC285638	0	LINC01023	0	MAN2A1	0	TSLP	0	SLC25A46	-0.1
Breast_SE_1761	EFNA5	0.63	FER	0.18	LOC285638	0.04	MAN2A1	0	CAMK4	0	WDR36	0	STARD4	0	TSLP	-0.1	FBXL17	-0.1	STARD4-AS1	-0.2
Breast_SE_1762	EFNA5	0.84	MAN2A1	0.32	CAMK4	0.29	STARD4	0.24	LOC285638	0.18	FER	0.17	TSLP	0.12	WDR36	0.12	STARD4-AS1	0.06	FBXL17	0.05
Breast_SE_1767	LINC01023	0.48	FER	0.38	WDR36	0.38	PJA2	0.36	SNORA13	0.27	LOC285638	0.27	MAN2A1	0.24	TMEM232	0.16	FBXL17	0.15	CAMK4	0.13
Breast_SE_1768	LOC101927023	0.64	DCP2	0.56	EPB41L4A-AS2	0.53	EPB41L4A	0.5	KCNN2	0.45	REEP5	0.45	NREP-AS1	0.32	LOC101927078	0.28	SNORA13	0.27	SRP19	0.19
Breast_SE_1770	DMXL1	0.46	TNFAIP8	0.38	HSD17B4	0.34	LOC101927190	0.22	DTWD2	0.17	LOC100505841	0.15	ZNF474	0.12	LOX	0.1	MIR1244-1	0.08	SEMA6A-AS1	0.07
Breast_SE_1771	LOX	0.87	PRR16	0.61	ZNF474	0.55	CSNK1G3	0.51	CEP120	0.44	LOC100505841	0.36	SRFBP1	0.17	LINC01170	0.14	ZNF608	0.09	SNX24	0.08
Breast_SE_1772	ZNF608	0.78	ALDH7A1	0.5	PPIC	0.43	PRDM6	0.37	C5orf63	0.33	LOC101927421	0.31	MGC32805	0.31	LOC101927357	0.31	LINC01170	0.24	LMNB1	0.24
Breast_SE_1773	ZNF608	0.45	PRDM6	0.37	ALDH7A1	0.35	LOC101927357	0.33	C5orf63	0.31	LINC01170	0.3	MEGF10	0.29	SNX2	0.21	PPIC	0.16	LOC101927421	0.15
Breast_SE_1774	ALDH7A1	0.52	ZNF608	0.49	C5orf63	0.34	LINC01170	0.33	PRDM6	0.26	PPIC	0.25	CEP120	0.24	PHAX	0.21	CTXN3	0.21	SLC12A2	0.17
Breast_SE_1775	ZNF608	0.42	LINC01170	0.39	C5orf63	0.28	ALDH7A1	0.21	SLC12A2	0.09	PRDM6	0.09	LOC101927421	0.09	LMNB1	0.08	PPIC	0.08	LINC01184	0.05
Breast_SE_1777	PHAX	0.35	C5orf63	0.35	MEGF10	0.3	ALDH7A1	0.28	TEX43	0.23	LINC01184	0.2	LMNB1	0.2	CEP120	0.19	LOC101927421	0.19	ZNF608	0.19
Breast_SE_1778	PHAX	0.7	LMNB1	0.37	ALDH7A1	0.28	ADAMTS19-AS1	0.28	TEX43	0.26	PRRC1	0.25	LINC01170	0.14	ZNF608	0.12	CTXN3	0.07	C5orf63	0.03
Breast_SE_1783	CDC42SE2	0.63	IL5	0.42	SLC22A5	0.31	MIR3936	0.29	RAD50	0.17	RAPGEF6	0.13	HINT1	0.02	C5orf56	0	IRF1	0	SLC22A4	-0.1
Breast_SE_1784	FNIP1	0.18	ACSL6	0.17	MIR3936	0.14	C5orf56	0.13	RAD50	0.11	CDC42SE2	0.08	HINT1	0.07	IL5	0.07	SLC22A5	0.07	IL13	0.06
Breast_SE_1785	SLC22A4	0.6	PDLIM4	0.59	P4HA2	0.59	P4HA2-AS1	0.56	MIR6830	0.54	CSF2	0.41	RAD50	0.34	RAPGEF6	0.27	IRF1	0.16	C5orf56	0.12
Breast_SE_1786	PDLIM4	0.66	P4HA2	0.51	MIR6830	0.5	P4HA2-AS1	0.45	SLC22A4	0.42	ACSL6	0.3	IL5	0.18	IRF1	0.18	RAD50	0.15	CSF2	0.11
Breast_SE_1787	C5orf56	0.65	IRF1	0.58	MIR6830	0.35	SLC22A4	0.33	P4HA2	0.2	MIR3936	0.18	CCNI2	0.16	IL5	0.15	SHROOM1	0.03	SLC22A5	0
Breast_SE_1788	LEAP2	0.23	AFF4	0.21	C5orf56	0.21	KIF3A	0.15	RAD50	0.15	MIR3936	0.15	GDF9	0.13	UQCRQ	0.12	MIR1289-2	0.09	SLC22A5	0.09
Breast_SE_1790	TCF7	0.53	SKP1	0.37	CDKL3	0.21	UBE2B	0.21	CDKN2AIPNL	0.17	C5orf24	0.13	CAMLG	0.11	MIR1289-2	0.11	MIR3661	0.07	TXNDC15	0.06
Breast_SE_1793	PCBD2	0.42	DDX46	0.31	CATSPER3	0.27	MIR3661	0.21	CDKL3	0.2	LOC102546229	0.12	UBE2B	0.11	MIR4461	0.1	CDKN2AIPNL	0.08	JADE2	0.06
Breast_SE_1795	JADE2	0.62	VDAC1	0.54	CDKN2AIPNL	0.5	UBE2B	0.37	PPP2CA	0.36	PCBD2	0.34	SEC24A	0.33	SKP1	0.33	PITX1	0.32	TXNDC15	0.3
Breast_SE_1796	CDKL3	0.35	CDKN2AIPNL	0.31	PCBD2	0.28	CAMLG	0.23	CATSPER3	0.22	SKP1	0.18	C5orf24	0.14	DDX46	0.08	PITX1	0.06	SEC24A	0.04
Breast_SE_1797	PITX1	0.83	C5orf66-AS1	0.43	NEUROG1	0.32	C5orf24	0.31	CATSPER3	0.29	PCBD2	0.26	DCANP1	0.24	SEC24A	0.23	TIFAB	0.21	JADE2	0.15
Breast_SE_1798	MIR4461	0.4	PITX1	0.29	JADE2	0.27	DDX46	0.23	C5orf66-AS1	0.18	PCBD2	0.17	TIFAB	0.14	CXCL14	0.12	DCANP1	0.08	NEUROG1	0
Breast_SE_1801	TGFBI	0.79	SPOCK1	0.64	VTRNA2-1	0.43	PITX1	0.28	SMAD5	0.2	CXCL14	0.17	SMAD5-AS1	0.13	C5orf66-AS1	0.1	NEUROG1	0.07	MIR5692C1	0
Breast_SE_1802	KDM3B	0.42	LOC100128966	0.38	NPY6R	0.27	CDC25C	0.27	REEP2	0.23	PKD2L2	0.23	FAM13B	0.22	NME5	0.19	KLHL3	0.19	HNRNPA0	0.19
Breast_SE_1803	KDM3B	0.42	LOC100128966	0.39	CDC25C	0.27	NPY6R	0.27	PKD2L2	0.23	REEP2	0.23	FAM13B	0.23	NME5	0.2	HNRNPA0	0.19	KLHL3	0.18
Breast_SE_1804	KDM3B	0.42	LOC100128966	0.39	CDC25C	0.27	NPY6R	0.27	PKD2L2	0.23	REEP2	0.23	FAM13B	0.23	NME5	0.19	HNRNPA0	0.19	KLHL3	0.18
Breast_SE_1805	KDM3B	0.42	LOC100128966	0.39	CDC25C	0.27	NPY6R	0.27	PKD2L2	0.23	REEP2	0.23	FAM13B	0.23	NME5	0.19	HNRNPA0	0.19	KLHL3	0.18
Breast_SE_1806	KDM3B	0.42	LOC100128966	0.38	CDC25C	0.27	NPY6R	0.27	PKD2L2	0.24	FAM13B	0.23	REEP2	0.23	NME5	0.19	HNRNPA0	0.19	KLHL3	0.18
Breast_SE_1807	FAM13B	0.48	KDM3B	0.45	PKD2L2	0.45	LOC100128966	0.44	BRD8	0.43	FAM53C	0.42	GFRA3	0.38	CDC25C	0.35	HSPA9	0.3	REEP2	0.3
Breast_SE_1808	NME5	0.47	KDM3B	0.43	CTNNA1	0.23	LOC100128966	0.22	BRD8	0.22	WNT8A	0.16	HSPA9	0.15	FAM13B	0.12	PKD2L2	0.11	SIL1	0.08
Breast_SE_1809	BRD8	0.61	KDM3B	0.56	FAM13B	0.39	LOC100128966	0.38	PKD2L2	0.37	NME5	0.29	SNORD63	0.2	WNT8A	0.16	FAM53C	0.13	CDC25C	0.09
Breast_SE_1810	NME5	0.42	MATR3	0.31	CDC25C	0.23	CDC23	0.18	BRD8	0.14	KDM3B	0.13	WNT8A	0.07	GFRA3	0.03	EGR1	0	LOC100128966	0
Breast_SE_1811	NME5	0.48	KDM3B	0.45	GFRA3	0.41	BRD8	0.2	LOC100128966	0.13	MATR3	0.1	CDC23	0.08	SNORD63	0.04	EGR1	0	CDC25C	0
Breast_SE_1812	SLC23A1	0.44	CXXC5	0.43	MZB1	0.35	PSD2	0.33	PAIP2	0.17	PROB1	0.16	SNORD63	0.16	MATR3	0.08	SNORA74A	0.04	UBE2D2	0.04
Breast_SE_1813	PROB1	0.23	SLC23A1	0.23	CTNNA1	0.22	UBE2D2	0.19	MZB1	0.19	HSPA9	0.15	PAIP2	0.15	PSD2	0.14	CXXC5	0.12	SIL1	0.09
Breast_SE_1814	PROB1	0.64	MZB1	0.54	SLC23A1	0.47	CXXC5	0.31	SPATA24	0.22	PSD2	0.19	CTNNA1	0.15	PAIP2	0.05	IGIP	0.05	TMEM173	0
Breast_SE_1815	CXXC5	0.92	PURA	0.51	LOC101929719	0.42	PSD2	0.4	MZB1	0.38	UBE2D2	0.3	SLC23A1	0.29	IGIP	0.19	ECSCR	0.15	MATR3	0.15
Breast_SE_1816	PURA	0.47	IGIP	0.35	LOC101929719	0.28	CYSTM1	0.25	CXXC5	0.25	NDUFA2	0.23	SLC35A4	0.15	TMCO6	0.12	MIR6831	0.12	PSD2	0.12
Breast_SE_1819	HBEGF	0.66	PFDN1	0.36	IK	0.14	CD14	0.13	MIR3655	0.12	TMCO6	0.08	ANKHD1-EIF4EBP3	0.07	ANKHD1	0.05	SRA1	0.05	APBB3	0
Breast_SE_1820	DND1	0.62	APBB3	0.56	WDR55	0.46	ANKHD1-EIF4EBP3	0.35	ANKHD1	0.34	CD14	0.3	SLC35A4	0.3	EIF4EBP3	0.27	MIR6831	0.27	ZMAT2	0.22
Breast_SE_1821	DND1	0.63	WDR55	0.51	NDUFA2	0.46	ZMAT2	0.45	SRA1	0.35	SLC35A4	0.34	APBB3	0.29	EIF4EBP3	0.27	MIR6831	0.18	HARS2	0.17
Breast_SE_1822	LOC101926905	0.92	PCDHB8	0.7	PCDHB5	0.67	PCDHB3	0.67	PCDHB4	0.65	PCDHB1	0.63	PCDHAC1	0.6	PCDHB13	0.58	PCDHAC2	0.58	PCDHB12	0.54
Breast_SE_1823	LOC101926905	0.81	PCDHB4	0.76	PCDHB3	0.72	PCDHB6	0.67	PCDHB12	0.64	PCDHB7	0.58	PCDHB13	0.57	PCDHB16	0.57	PCDHB8	0.54	PCDHB11	0.47
Breast_SE_1824	PCDHGB2	0.62	PCDHGC5	0.62	PCDHGA6	0.61	PCDHGB3	0.61	PCDHGA12	0.61	PCDHGA5	0.61	PCDHGC3	0.61	PCDHGA7	0.61	PCDHGC4	0.61	PCDHGB7	0.61
Breast_SE_1825	PCDH1	0.71	LOC729080	0.58	PCDH12	0.16	LOC100505658	0.14	NDFIP1	0.09	RNF14	0.09	DIAPH1	0	RELL2	-0.1	PCDHGA12	-0.2	PCDHGC5	-0.2
Breast_SE_1826	RNF14	0.27	LOC100505658	0.25	PCDHGA11	0.23	PCDHGC5	0.23	PCDHGC4	0.23	PCDHGA12	0.23	KIAA0141	0.22	NDFIP1	0.22	PCDHGC3	0.16	PCDH12	0.08
Breast_SE_1827	SPRY4	0.73	FCHSD1	0.56	KIAA0141	0.4	HDAC3	0.28	RELL2	0.28	FGF1	0.27	GNPDA1	0.26	NDFIP1	0.09	ARHGAP26	0.08	RNF14	0.03
Breast_SE_1828	SPRY4	0.53	ARAP3	0.28	FCHSD1	0.12	ARHGAP26-IT1	0.05	NR3C1	0.04	ARHGAP26	0.04	GNPDA1	0.01	FGF1	0	ARHGAP26-AS1	0	RNF14	-0.1
Breast_SE_1829	SPRY4	0.53	FGF1	0.47	ARAP3	0.4	FCHSD1	0.28	NR3C1	0.26	ARHGAP26	0.18	DIAPH1	0.07	GNPDA1	0	RELL2	0	KIAA0141	0
Breast_SE_1831	ARHGAP26	0.71	ARHGAP26-AS1	0.42	NR3C1	0.37	HMHB1	0.3	GNPDA1	0.14	HDAC3	0.1	RNF14	0.04	MIR5197	0	FGF1	0	KIAA0141	0
Breast_SE_1832	YIPF5	0.7	NR3C1	0.6	KIAA0141	0.57	FGF1	0.46	SPRY4	0.38	RELL2	0.35	FCHSD1	0.34	ARAP3	0.32	RNF14	0.2	GNPDA1	0.18
Breast_SE_1834	NR3C1	0.88	YIPF5	0.61	RNF14	0.38	ARHGAP26	0.35	FGF1	0.31	NDFIP1	0.23	GNPDA1	0.2	KCTD16	0.18	HMHB1	0.16	KIAA0141	0.14
Breast_SE_1835	SH3RF2	0.61	PLAC8L1	0.5	LARS	0.47	YIPF5	0.43	STK32A	0.34	GRXCR2	0.33	C5orf46	0.31	PRELID2	0.3	KCTD16	0.27	JAKMIP2-AS1	0.19
Breast_SE_1837	SPINK6	0.92	SPINK7	0.87	LOC102546294	0.19	SH3TC2	0.15	FBXO38	0.08	SPINK9	0.06	ABLIM3	0.02	MIR584	0.01	ADRB2	0.01	SPINK13	0
Breast_SE_1838	PCYOX1L	0.44	SH3TC2	0.42	FBXO38	0.36	CSNK1A1	0.33	AFAP1L1	0.32	SPINK6	0.31	ARHGEF37	0.31	ADRB2	0.3	ABLIM3	0.28	SPINK9	0.25
Breast_SE_1839	ABLIM3	0.64	SPINK9	0.26	PCYOX1L	0.26	SPINK7	0.16	ADRB2	0.15	MIR584	0.14	SH3TC2	0.13	CSNK1A1	0.12	MIR378A	0.09	MIR143	0.04
Breast_SE_1840	PCYOX1L	0.58	IL17B	0.52	ARHGEF37	0.47	TIGD6	0.46	MIR143	0.44	CSF1R	0.35	MIR145	0.35	PDE6A	0.33	HMGXB3	0.21	CSNK1A1	0.17
Breast_SE_1841	PPARGC1B	0.54	CAMK2A	0.29	GRPEL2	0.26	ARHGEF37	0.26	PDE6A	0.25	CDX1	0.24	MIR378A	0.19	PCYOX1L	0.16	TIGD6	0.16	SLC6A7	0.12
Breast_SE_1842	SLC26A2	0.77	TCOF1	0.53	TIGD6	0.45	MIR378A	0.44	HMGXB3	0.37	PDGFRB	0.26	ARSI	0.25	MIR143	0.24	PPARGC1B	0.24	MIR145	0.23
Breast_SE_1843	HMGXB3	0.56	ARSI	0.55	MIR145	0.5	PDGFRB	0.46	TIGD6	0.44	CSNK1A1	0.41	NDST1	0.4	SLC26A2	0.3	TCOF1	0.29	RPS14	0.24
Breast_SE_1844	PDGFRB	0.69	SYNPO	0.63	CSF1R	0.55	TIGD6	0.51	CDX1	0.46	PDE6A	0.43	CAMK2A	0.42	HMGXB3	0.42	ARSI	0.41	RPS14	0.31
Breast_SE_1845	ARSI	0.57	SMIM3	0.43	CAMK2A	0.43	SYNPO	0.42	SLC26A2	0.41	TIGD6	0.36	CSF1R	0.32	HMGXB3	0.31	TCOF1	0.28	PDGFRB	0.24
Breast_SE_1846	NDST1	0.77	TIGD6	0.6	DCTN4	0.55	HMGXB3	0.4	IRGM	0.33	RBM22	0.33	SMIM3	0.28	PDGFRB	0.23	SYNPO	0.22	LOC644762	0.21
Breast_SE_1847	SYNPO	0.81	SMIM3	0.57	ARSI	0.44	PDGFRB	0.41	CAMK2A	0.37	ANXA6	0.36	CDX1	0.34	MYOZ3	0.34	RPS14	0.28	NDST1	0.28
Breast_SE_1848	SMIM3	0.74	NDST1	0.51	SYNPO	0.45	MYOZ3	0.39	TCOF1	0.27	ARSI	0.25	ZNF300	0.23	DCTN4	0.22	GM2A	0.22	SLC36A3	0.19
Breast_SE_1849	SYNPO	0.41	CCDC69	0.39	TNIP1	0.37	ANXA6	0.33	SMIM3	0.28	SLC36A2	0.27	NDST1	0.18	SLC36A1	0.16	GM2A	0.14	ZNF300	0.07
Breast_SE_1850	SLC36A2	0.56	SLC36A3	0.52	CCDC69	0.5	GM2A	0.44	ZNF300P1	0.11	MIR6499	0.08	ATOX1	0.08	IRGM	0.04	SLC36A1	0.03	GPX3	0
Breast_SE_1851	SLC36A3	0.58	SLC36A2	0.58	GM2A	0.54	FAT2	0.19	CCDC69	0.19	ZNF300P1	0.12	ATOX1	0.05	GLRA1	0.03	SLC36A1	0.02	IRGM	0
Breast_SE_1852	SPARC	0.7	SLC36A1	0.51	SMIM3	0.5	ANXA6	0.48	G3BP1	0.47	LOC100652758	0.39	ATOX1	0.38	ZNF300	0.33	GM2A	0.31	GLRA1	0.26
Breast_SE_1853	GALNT10	0.72	FAXDC2	0.52	SAP30L-AS1	0.46	LINC01470	0.23	SAP30L	0.2	CNOT8	0.19	MIR1294	0.18	FAM114A2	0.14	SGCD	0.11	MRPL22	0.11
Breast_SE_1854	LARP1	0.63	FAXDC2	0.58	SAP30L	0.55	CNOT8	0.52	MIR378H	0.44	GALNT10	0.35	LINC01470	0.27	MIR1303	0.12	GEMIN5	0.08	KIF4B	0.08
Breast_SE_1855	ADAM19	0.84	THG1L	0.61	RNF145	0.52	EBF1	0.46	LOC102724404	0.29	LSM11	0.2	NIPAL4	0.17	SGCD	0.14	ITK	0.11	MED7	0.1
Breast_SE_1856	FAM71B	0.92	LSM11	0.49	MED7	0.46	CLINT1	0.34	ITK	0.29	PPP1R2P3	0.22	RNF145	0.18	THG1L	0.17	UBLCP1	0.12	SOX30	0.01
Breast_SE_1857	EBF1	0.93	LSM11	0.55	UBLCP1	0.36	LOC102724404	0.35	TTC1	0.32	CLINT1	0.31	RNF145	0.29	ADAM19	0.25	THG1L	0.22	FABP6	0.2
Breast_SE_1858	RNF145	0.74	PTTG1	0.61	UBLCP1	0.58	LOC285626	0.55	ADRA1B	0.5	IL12B	0.47	THG1L	0.39	MIR146A	0.39	SLU7	0.32	LSM11	0.31
Breast_SE_1859	LOC285626	0.74	ADRA1B	0.65	RNF145	0.4	IL12B	0.39	MIR146A	0.29	UBLCP1	0.23	SLU7	0.23	C1QTNF2	0.15	TTC1	0.14	ATP10B	0.1
Breast_SE_1860	PTTG1	0.71	UBLCP1	0.66	EBF1	0.58	PWWP2A	0.45	ADRA1B	0.43	RNF145	0.39	ZBED8	0.34	CCNJL	0.3	TTC1	0.29	LOC285626	0.24
Breast_SE_1861	CCNJL	0.82	PWWP2A	0.45	GABRB2	0.34	ATP10B	0.31	FABP6	0.27	ZBED8	0.26	C1QTNF2	0.19	IL12B	0.04	GABRA6	0	ADRA1B	0
Breast_SE_1863	TENM2	0.74	RARS	0.5	FAM196B	0.45	SPDL1	0.41	MIR218-2	0.28	FBLL1	0.25	LCP2	0.15	C5orf58	0.06	LOC101927908	0	MIR585	0
Breast_SE_1864	WWC1	0.86	FOXI1	0.43	CTB-178M22.2	0.38	LINC01187	0.3	PANK3	0.12	DOCK2	0.01	MIR585	0	LOC101927908	0	MIR378E	0	MIR103A1	0
Breast_SE_1865	SLIT3	0.75	MIR218-2	0.59	FBLL1	0.43	C5orf58	0.41	SPDL1	0.29	MIR103B1	0.26	MIR103A1	0.26	KCNIP1	0.11	FOXI1	0.1	LINC01366	0.08
Breast_SE_1866	SPDL1	0.74	FAM196B	0.43	SLIT3	0.37	DOCK2	0.37	KCNIP1	0.3	MIR103B1	0.21	MIR103A1	0.21	MIR218-2	0.2	KCNMB1	0.15	C5orf58	0.1
Breast_SE_1868	FOXI1	0.67	LINC01187	0.34	GABRP	0.33	KCNIP1	0.23	MIR3912	0.2	RANBP17	0.13	TLX3	0.07	FGF18	0.03	SPDL1	0.01	MIR378E	0
Breast_SE_1870	GABRP	0.65	FOXI1	0.52	CTD-2270F17.1	0.36	RANBP17	0.22	KCNMB1	0.16	MIR3912	0.13	LINC01366	0.04	LINC01187	0.04	DOCK2	0.01	MIR378E	0
Breast_SE_1872	FGF18	0.65	UBTD2	0.39	KCNIP1	0.36	LCP2	0.3	LINC01366	0.29	RANBP17	0.29	C5orf58	0.26	NPM1	0.26	TLX3	0.24	FBXW11	0.21
Breast_SE_1873	FBXW11	0.62	MIR3912	0.51	EFCAB9	0.48	UBTD2	0.42	CREBRF	0.42	LOC100268168	0.33	ATP6V0E1	0.32	LOC101928093	0.24	SNORA74B	0.2	ERGIC1	0.19
Breast_SE_1874	STK10	0.74	ATP6V0E1	0.51	FBXW11	0.51	NPM1	0.43	RPL26L1	0.35	ERGIC1	0.33	LOC101928093	0.29	SNORA74B	0.25	EFCAB9	0.23	CREBRF	0.22
Breast_SE_1875	SH3PXD2B	0.69	CREBRF	0.44	SNORA74B	0.37	ATP6V0E1	0.26	NKX2-5	0.25	UBTD2	0.2	NEURL1B	0.19	BNIP1	0.15	MIR5003	0.15	FBXW11	0.08
Breast_SE_1876	ERGIC1	0.39	CREBRF	0.33	FBXW11	0.31	DUSP1	0.29	NKX2-5	0.26	LOC100268168	0.22	UBTD2	0.21	EFCAB9	0.16	NEURL1B	0.09	STK10	0.09
Breast_SE_1878	STC2	0.39	BOD1	0.36	NKX2-5	0.35	DUSP1	0.31	LOC101928093	0.15	ATP6V0E1	0.14	LOC100268168	0.12	ERGIC1	0.1	CREBRF	0.03	BNIP1	0.01
Breast_SE_1879	LINC01485	0.46	LOC100268168	0.43	NEURL1B	0.42	LOC285593	0.41	C5orf47	0.4	CPEB4	0.38	ERGIC1	0.31	BOD1	0.31	CREBRF	0.3	LINC01484	0.22
Breast_SE_1881	MSX2	0.88	CPLX2	0.6	HRH2	0.58	LINC01485	0.47	LOC285593	0.44	C5orf47	0.43	CPEB4	0.4	BNIP1	0.36	SFXN1	0.32	MIR4634	0.28
Breast_SE_1882	TSPAN17	0.37	HIGD2A	0.31	EIF4E1B	0.27	FAF2	0.24	NOP16	0.18	CDHR2	0.15	GPRIN1	0.14	CLTB	0.13	KIAA1191	0.12	RNF44	0.1
Breast_SE_1883	UNC5A	0.48	HK3	0.47	RNF44	0.46	EIF4E1B	0.45	CDHR2	0.43	SIMC1	0.43	UIMC1	0.37	LOC643201	0.32	TSPAN17	0.28	GPRIN1	0.27
Breast_SE_1884	UNC5A	0.64	HIGD2A	0.44	FGFR4	0.42	GPRIN1	0.39	CDHR2	0.37	TSPAN17	0.36	ZNF346	0.36	EIF4E1B	0.31	RNF44	0.26	KIAA1191	0.2
Breast_SE_1885	UNC5A	0.95	HK3	0.75	FGFR4	0.48	NSD1	0.47	ZNF346	0.45	GPRIN1	0.42	RNF44	0.41	HIGD2A	0.3	EIF4E1B	0.27	TSPAN17	0.23
Breast_SE_1887	FGFR4	0.87	HK3	0.56	SLC34A1	0.48	RAB24	0.41	MXD3	0.37	RGS14	0.36	ZNF346	0.3	PRELID1	0.29	DBN1	0.23	F12	0.23
Breast_SE_1889	RAB24	0.59	MXD3	0.59	LMAN2	0.54	ZNF346	0.54	PRELID1	0.49	GRK6	0.43	DDX41	0.41	DBN1	0.38	TMED9	0.35	PDLIM7	0.28
Breast_SE_1890	RMND5B	0.8	N4BP3	0.77	HNRNPAB	0.6	FAM153C	0.53	LOC100128340	0.43	CLK4	0.34	LOC202181	0.32	PROP1	0.28	DOK3	0.22	DDX41	0.22
Breast_SE_1891	RMND5B	0.66	ZNF354A	0.58	HNRNPAB	0.57	NHP2	0.51	N4BP3	0.46	PHYKPL	0.38	COL23A1	0.29	CLK4	0.29	ZNF354B	0.28	LOC202181	0.28
Breast_SE_1894	ADAMTS2	0.89	CANX	0.49	AACSP1	0.37	MIR1229	0.28	MGAT4B	0.26	ZNF354A	0.22	ZNF454	0.17	ZNF879	0.14	RUFY1	0.12	ZNF354C	0.06
Breast_SE_1895	RUFY1	0.63	LOC101928445	0.58	RNF130	0.57	MAML1	0.42	LOC100996419	0.42	MGAT4B	0.32	ADAMTS2	0.31	SQSTM1	0.3	TBC1D9B	0.28	C5orf60	0.27
Breast_SE_1896	RUFY1	0.69	LOC101928445	0.64	MAML1	0.57	MAPK9	0.49	MGAT4B	0.49	RNF130	0.4	GFPT2	0.33	MIR1229	0.32	C5orf60	0.31	CANX	0.25
Breast_SE_1897	GFPT2	0.73	SQSTM1	0.39	HEIH	0.39	MAPK9	0.38	LINC00847	0.38	MGAT4B	0.29	RNF130	0.25	MAML1	0.25	RASGEF1C	0.17	FLT4	0.14
Breast_SE_1898	CNOT6	0.68	MAPK9	0.53	FLT4	0.48	SCGB3A1	0.44	OR2V1	0.37	BTNL9	0.34	RNF130	0.33	TBC1D9B	0.28	MIR8089	0.28	BTNL8	0.27
Breast_SE_1899	CTC-338M12.4	0.36	CNOT6	0.36	ZFP62	0.34	HEIH	0.32	BTNL3	0.27	BTNL8	0.27	LINC00847	0.25	TRIM41	0.2	SNORD96A	0.19	OR2V1	0.15
Breast_SE_1900	CTC-338M12.4	0.52	TRIM41	0.46	BTNL9	0.43	TRIM52	0.42	BTNL8	0.32	MIR8089	0.27	OR2V2	0.24	BTNL3	0.2	OR2V1	0.13	SNORD95	0.12
Breast_SE_1901	EXOC2	0.5	FOXCUT	0.49	DUSP22	0.44	FOXC1	0.34	GMDS	0.33	FOXQ1	0.32	IRF4	0.3	MIR4645	0.24	LINC00266-3	0.23	WRNIP1	0.2
Breast_SE_1902	FOXQ1	0.81	FOXF2	0.62	MIR6720	0.59	SERPINB1	0.43	EXOC2	0.42	WRNIP1	0.36	SERPINB9P1	0.35	HUS1B	0.3	FOXC1	0.28	MIR4645	0.22
Breast_SE_1903	FOXF2	0.48	MIR6720	0.46	WRNIP1	0.28	SERPINB1	0.23	IRF4	0.16	FOXC1	0.15	GMDS-AS1	0.14	LOC101927730	0.12	FOXQ1	0.1	SERPINB9P1	0
Breast_SE_1904	FOXC1	0.88	FOXCUT	0.72	FOXQ1	0.39	SERPINB9P1	0.3	GMDS	0.28	MIR4645	0.27	SERPINB9	0.25	FOXF2	0.23	MIR6720	0.23	IRF4	0.23
Breast_SE_1905	FOXCUT	0.8	FOXC1	0.7	MIR4645	0.46	GMDS	0.36	MYLK4	0.34	SERPINB9	0.34	SERPINB9P1	0.32	LOC101927730	0.28	FOXQ1	0.17	LOC101927691	0.1
Breast_SE_1906	FOXCUT	0.67	MYLK4	0.58	FOXC1	0.54	SERPINB9P1	0.49	GMDS	0.34	FOXQ1	0.23	SERPINB9	0.16	LINC01011	0.13	WRNIP1	0.12	LOC101927730	0.1
Breast_SE_1908	SERPINB9P1	0.53	MYLK4	0.46	FOXC1	0.45	MIR4645	0.42	GMDS	0.4	SERPINB1	0.34	TUBB2B	0.31	TUBB2A	0.15	BPHL	0.11	GMDS-AS1	0.05
Breast_SE_1909	SERPINB9	0.59	PSMG4	0.55	TUBB2A	0.49	RIPK1	0.47	HTATSF1P2	0.47	MIR4645	0.47	LOC101927730	0.46	WRNIP1	0.44	SERPINB9P1	0.38	GMDS-AS1	0.3
Breast_SE_1910	SERPINB1	0.64	SERPINB9	0.56	LOC101927730	0.5	SERPINB9P1	0.43	MIR4645	0.37	WRNIP1	0.36	HTATSF1P2	0.36	TUBB2A	0.24	PSMG4	0.23	GMDS-AS1	0.15
Breast_SE_1911	NQO2	0.66	HTATSF1P2	0.66	WRNIP1	0.6	BPHL	0.6	RIPK1	0.56	PSMG4	0.53	SERPINB6	0.45	GMDS-AS1	0.43	LINC01011	0.41	LOC101927759	0.38
Breast_SE_1913	LOC643327	0.77	SLC22A23	0.74	LINC01011	0.36	BPHL	0.3	SERPINB6	0.17	LOC101927759	0.16	HTATSF1P2	0.03	SERPINB9P1	0	FAM50B	4.23	PSMG4	0
Breast_SE_1915	PXDC1	0.78	LOC100507506	0.39	TUBB2A	0.36	LOC643327	0.17	FAM50B	0.17	HTATSF1P2	0.15	TUBB2B	0.14	RIPK1	0.11	C6orf201	0.08	PRPF4B	0.08
Breast_SE_1916	PXDC1	0.46	LOC102724096	0.2	LOC101927759	0.17	LOC100507506	0.17	PRPF4B	0.12	SLC22A23	0.11	KU-MEL-3	0.1	LOC643327	0.09	TUBB2A	0.02	HTATSF1P2	0.01
Breast_SE_1917	BPHL	0.53	SLC22A23	0.35	LOC101927759	0.31	HTATSF1P2	0.31	PRPF4B	0.24	KU-MEL-3	0.2	LOC102724096	0.16	RIPK1	0.16	CDYL	0.12	FAM50B	0.12
Breast_SE_1919	PXDC1	0.52	PSMG4	0.41	CDYL	0.39	KU-MEL-3	0.33	LOC100507506	0.27	RPP40	0.24	PPP1R3G	0.22	MIR3691	0.21	LOC101927972	0.17	SLC22A23	0.17
Breast_SE_1920	LOC100507506	0.45	KU-MEL-3	0.44	LOC101927950	0.41	ECI2	0.36	CDYL	0.33	FAM50B	0.31	SLC22A23	0.27	LOC102724096	0.21	LOC643327	0.21	PXDC1	0.21
Breast_SE_1922	NRN1	0.92	LY86-AS1	0.46	RIOK1	0.3	PPP1R3G	0.21	LOC101927972	0.13	CAGE1	0.12	KU-MEL-3	0.08	RREB1	0	MIR7853	0	MIR5683	0
Breast_SE_1923	DSP	0.44	RREB1	0.36	F13A1	0.23	CAGE1	0.21	LOC101927972	0.07	LOC101927950	0.04	MIR5683	0	MIR7853	0	NRN1	0	PIP5K1P1	0
Breast_SE_1924	RREB1	0.56	EEF1E1-BLOC1S5	0.38	DSP	0.37	LY86-AS1	0.34	EEF1E1	0.32	BLOC1S5	0.31	SCARNA27	0.31	PIP5K1P1	0.29	CAGE1	0.28	F13A1	0.06
Breast_SE_1925	RREB1	0.72	DSP	0.56	PIP5K1P1	0.35	CAGE1	0.29	SCARNA27	0.27	LY86-AS1	0.16	BLOC1S5	0.14	SNRNP48	0.08	EEF1E1-BLOC1S5	0.01	MIR5683	0
Breast_SE_1927	DSP	0.87	RREB1	0.54	LOC100506207	0.54	HULC	0.43	SLC35B3	0.35	CAGE1	0.34	SCARNA27	0.32	BLOC1S5	0.12	EEF1E1-BLOC1S5	0.06	MIR5683	0
Breast_SE_1928	SCARNA27	0.46	SLC35B3	0.33	HULC	0.31	EEF1E1-BLOC1S5	0.21	EEF1E1	0.18	CAGE1	0.16	BLOC1S5	0.15	RREB1	0.09	MIR5683	0	DSP	0
Breast_SE_1930	TFAP2A	0.49	TFAP2A-AS1	0.39	MIR5689	0.16	GCM2	0.16	TMEM170B	0.15	LINC00518	0.13	HULC	0.13	SYCP2L	0.13	LOC101928191	0.07	NEDD9	0.05
Breast_SE_1931	TFAP2A	0.83	TFAP2A-AS1	0.77	TMEM170B	0.45	GCM2	0.44	LINC00518	0.34	NEDD9	0.29	LOC101928191	0.29	GCNT2	0.24	MIR5689	0.22	SYCP2L	0.02
Breast_SE_1932	GCNT2	0.71	GCM2	0.41	C6orf52	0.35	TMEM170B	0.3	TFAP2A-AS1	0.27	LOC101928191	0.22	SYCP2L	0.19	SMIM13	0.19	NEDD9	0.17	TFAP2A	0.16
Breast_SE_1933	GCM2	0.53	GCNT2	0.44	TMEM14B	0.38	LOC101928191	0.34	C6orf52	0.31	TMEM14C	0.29	LINC00518	0.28	SMIM13	0.27	SYCP2L	0.27	TMEM170B	0.26
Breast_SE_1934	NEDD9	0.62	TMEM170B	0.57	GCM2	0.56	TFAP2A	0.4	TFAP2A-AS1	0.35	C6orf52	0.32	LINC00518	0.21	GCNT2	0.16	MAK	0.15	SMIM13	0.15
Breast_SE_1935	EDN1	0.56	SMIM13	0.49	PAK1IP1	0.29	TMEM14C	0.28	TMEM14B	0.27	GCNT2	0.24	TMEM170B	0.17	GCM2	0.15	ELOVL2	0.13	C6orf52	0.1
Breast_SE_1936	TMEM14C	0.6	TMEM14B	0.51	ADTRP	0.45	PAK1IP1	0.33	LOC101928191	0.15	SMIM13	0.13	SYCP2L	0.09	C6orf52	0.07	GCNT2	0.06	HIVEP1	0.02
Breast_SE_1937	HIVEP1	0.81	TBC1D7	0.58	TMEM14B	0.46	PAK1IP1	0.37	NEDD9	0.35	ADTRP	0.33	SMIM13	0.29	LOC100130357	0.27	SYCP2L	0.26	GCM2	0.26
Breast_SE_1938	LOC100130357	0.52	TMEM170B	0.5	GCM2	0.49	SIRT5	0.46	EDN1	0.46	RANBP9	0.42	NOL7	0.32	NEDD9	0.3	TBC1D7	0.23	LOC101928191	0.22
Breast_SE_1939	LOC100130357	0.46	RANBP9	0.44	LOC101928191	0.39	GFOD1	0.36	EDN1	0.32	TBC1D7	0.3	NOL7	0.25	TMEM170B	0.24	ELOVL2-AS1	0.22	HIVEP1	0.18
Breast_SE_1940	LOC100130357	0.49	EDN1	0.45	NOL7	0.36	SMIM13	0.28	SIRT5	0.25	GFOD1	0.2	RNF182	0.15	MCUR1	0.14	PHACTR1	0.06	ELOVL2	0.05
Breast_SE_1942	ELOVL2-AS1	0.95	TMEM170B	0.2	NEDD9	0.18	TBC1D7	0.12	LOC101928253	0	ERVFRD-1	0	NOL7	0	GFOD1	0	LOC100130357	0	SMIM13	-0.1
Breast_SE_1943	GFOD1	0.7	SIRT5	0.58	JARID2-AS1	0.27	TBC1D7	0.24	LOC100130357	0.19	MCUR1	0.15	RANBP9	0.13	NOL7	0.08	LINC01108	0.03	LOC101928253	0
Breast_SE_1944	RANBP9	0.74	MYLIP	0.72	TBC1D7	0.57	HIVEP1	0.57	SIRT5	0.56	DTNBP1	0.56	MCUR1	0.54	LOC100130357	0.49	JARID2-AS1	0.47	GFOD1	0.44
Breast_SE_1945	GMPR	0.58	RNF182	0.29	LINC01108	0.25	CD83	0.25	ATXN1	0.13	NOL7	0.01	GFOD1	0	LOC101928433	0	PHACTR1	0	JARID2	-0.1
Breast_SE_1946	MIR4639	0.5	MYLIP	0.45	JARID2-AS1	0.4	TBC1D7	0.39	LOC100130357	0.33	STMND1	0.32	RANBP9	0.32	JARID2	0.31	LOC101928433	0.18	ATXN1	0.09
Breast_SE_1947	JARID2	0.61	MIR4639	0.57	RANBP9	0.53	DTNBP1	0.53	MYLIP	0.52	JARID2-AS1	0.42	MCUR1	0.39	TBC1D7	0.33	NOL7	0.31	LOC100130357	0.31
Breast_SE_1950	ATXN1	0.71	GMPR	0.62	LOC101928433	0.52	RBM24	0.25	CAP2	0.09	DEK	0.04	KIF13A	0	JARID2-AS1	0	TPMT	-0.1	STMND1	-0.1
Breast_SE_1951	STMND1	0.55	ATXN1	0.52	CAP2	0.52	RBM24	0.51	LOC101928433	0.48	DTNBP1	0.37	FAM8A1	0.28	DEK	0.22	KIF13A	0.19	LOC101928491	0.16
Breast_SE_1952	RBM24	0.87	CAP2	0.51	GMPR	0.46	LOC101928519	0.36	KIF13A	0.23	LOC101928433	0.22	ATXN1	0.21	DEK	0.2	NUP153	0.11	FAM8A1	0.11
Breast_SE_1953	RBM24	0.86	CAP2	0.51	GMPR	0.46	LOC101928519	0.36	KIF13A	0.23	LOC101928433	0.21	ATXN1	0.21	DEK	0.19	FAM8A1	0.11	NUP153	0.11
Breast_SE_1954	LOC101928433	0.63	CAP2	0.62	ATXN1	0.52	LOC101928491	0.45	RBM24	0.38	KDM1B	0.38	NUP153	0.35	DTNBP1	0.33	KIF13A	0.28	FAM8A1	0.25
Breast_SE_1956	NUP153	0.56	CAP2	0.49	KDM1B	0.44	RBM24	0.38	KIF13A	0.36	TPMT	0.31	LOC101928491	0.2	MIR4639	0.17	NHLRC1	0.17	MYLIP	0.15
Breast_SE_1958	DEK	0.69	ID4	0.39	KDM1B	0.31	LOC101928433	0.24	KIF13A	0.22	NUP153	0.21	RBM24	0.2	TPMT	0.18	ATXN1	0.13	NHLRC1	0.13
Breast_SE_1959	RNF144B	0.75	STMND1	0.54	LOC101928491	0.46	KDM1B	0.23	TPMT	0.21	MBOAT1	0.17	LOC101928433	0.16	ATXN1	0.15	FAM8A1	0.12	DEK	0.11
Breast_SE_1960	ID4	0.85	E2F3	0.49	LOC100506885	0.46	FAM8A1	0.44	SOX4	0.41	CDKAL1	0.41	MBOAT1	0.38	NHLRC1	0.37	TPMT	0.31	CASC15	0.3
Breast_SE_1961	MBOAT1	0.62	SOX4	0.56	CDKAL1	0.46	ID4	0.41	CASC15	0.26	HDGFL1	0.24	DEK	0.14	LOC100506885	0.12	FAM8A1	0.12	RNF144B	0.08
Breast_SE_1962	LINC00581	0.55	E2F3	0.48	KIF13A	0.46	KDM1B	0.41	DEK	0.4	NHLRC1	0.37	NUP153	0.34	TPMT	0.27	FAM8A1	0.23	SOX4	0.21
Breast_SE_1963	LINC00581	0.55	E2F3	0.48	KIF13A	0.46	KDM1B	0.42	DEK	0.4	NHLRC1	0.37	NUP153	0.34	TPMT	0.27	FAM8A1	0.23	SOX4	0.21
Breast_SE_1964	CDKAL1	0.86	ID4	0.35	SOX4	0.31	MBOAT1	0.26	E2F3	0.13	DEK	0.08	RNF144B	0.07	MIR548A1	0	LOC100506885	0	TPMT	0
Breast_SE_1965	CDKAL1	0.84	SOX4	0.5	MBOAT1	0.34	ID4	0.34	RNF144B	0.18	E2F3	0.1	ALDH5A1	0.1	LOC101928519	0.09	GPLD1	0.04	MIR548A1	0
Breast_SE_1966	SOX4	0.84	ALDH5A1	0.53	LINC00581	0.48	CASC15	0.43	GPLD1	0.42	LOC101928519	0.42	ID4	0.33	E2F3	0.32	CDKAL1	0.24	TDP2	0.24
Breast_SE_1969	KAAG1	0.69	DCDC2	0.69	C6orf229	0.39	ALDH5A1	0.32	GPLD1	0.31	ACOT13	0.15	MRS2	0.1	SCGN	0.04	SLC17A4	0.02	HIST1H2BA	0
Breast_SE_1970	C6orf62	0.51	ACOT13	0.46	ALDH5A1	0.24	SLC17A4	0.22	C6orf229	0.11	DCDC2	0.08	GPLD1	0.08	CMAHP	0.07	HIST1H2AA	0.07	LOC101928663	0.05
Breast_SE_1972	CMAHP	0.78	LOC101928663	0.47	ALDH5A1	0.46	GPLD1	0.33	C6orf62	0.3	ACOT13	0.29	KIAA0319	0.2	SLC17A1	0.15	SLC17A4	0.13	SCGN	0.12
Breast_SE_1973	HIST1H2AB	0.49	HIST1H3A	0.46	HIST1H2BE	0.35	HIST1H2BD	0.32	HIST1H1E	0.3	HIST1H3B	0.28	HIST1H1T	0.21	HIST1H3C	0.2	HIST1H2BC	0.19	HIST1H1C	0.18
Breast_SE_1974	HCG11	0.55	BTN2A1	0.47	LOC285819	0.43	HMGN4	0.36	HIST1H3F	0.35	HIST1H4G	0.31	BTN2A3P	0.25	BTN2A2	0.22	BTN3A2	0.21	BTN3A3	0.19
Breast_SE_1975	HIST1H2AG	0.47	HIST1H4I	0.37	GUSBP2	0.35	HCG11	0.34	MIR3143	0.33	ZNF391	0.32	HIST1H2BJ	0.31	HIST1H2AH	0.28	ZNF184	0.26	HIST1H2BK	0.13
Breast_SE_1977	HIST1H3H	0.47	HIST1H2AM	0.45	HIST1H4K	0.44	HIST1H2AJ	0.41	HIST1H2BL	0.38	HIST1H2AK	0.36	HIST1H2AI	0.35	LOC100131289	0.33	HIST1H3J	0.32	HIST1H2AL	0.32
Breast_SE_1978	ZKSCAN3	0.39	ZSCAN23	0.37	ZKSCAN8	0.36	ZSCAN31	0.33	ZSCAN12	0.29	ZNF192P1	0.25	ZSCAN9	0.24	ZSCAN16-AS1	0.21	NKAPL	0.19	PGBD1	0.17
Breast_SE_1979	HCG14	0.29	OR2J2	0.25	LOC100129636	0.23	OR2J3	0.22	ZKSCAN3	0.22	ZNF311	0.08	ZSCAN31	0.07	OR2W1	0	LOC101929006	0	OR14J1	0
Breast_SE_1980	ZFP57	0.6	HCG4	0.51	GABBR1	0.5	MOG	0.47	HLA-F	0.33	HLA-F-AS1	0.33	HCG4B	0.27	HLA-H	0.26	HLA-G	0.21	SNORD32B	0
Breast_SE_1983	HCG18	0.51	ABCF1	0.46	TRIM39	0.32	HCG17	0.31	PRR3	0.31	HLA-L	0.2	MIR877	0.19	TRIM10	0.18	TRIM15	0.14	TRIM26	0.12
Breast_SE_1984	MDC1	0.54	ATAT1	0.46	DHX16	0.42	MIR877	0.4	ABCF1	0.4	PRR3	0.4	TUBB	0.38	HCG18	0.35	HCG17	0.31	NRM	0.31
Breast_SE_1985	POU5F1	0.53	CCHCR1	0.51	PSORS1C3	0.4	PSORS1C1	0.38	C6orf15	0.37	DPCR1	0.36	PSORS1C2	0.34	VARS2	0.29	MUC22	0.22	SFTA2	0.2
Breast_SE_1986	HCG27	0.42	MICB	0.41	ATP6V1G2	0.35	NCR3	0.17	LINC01149	0.11	SNORD84	0.05	ATP6V1G2-DDX39B	0	DDX39B	0	MCCD1	-0.1	NFKBIL1	-0.1
Breast_SE_1987	SNORA38	0.24	LST1	0.24	HCG26	0.22	ATP6V1G2	0.21	SNORD84	0.2	LTA	0.18	MICB	0.16	ATP6V1G2-DDX39B	0.14	DDX39B	0.14	SNORD117	0.1
Breast_SE_1988	NFKBIL1	0.49	LY6G5B	0.43	ABHD16A	0.41	SNORA38	0.35	GPANK1	0.32	SNORD84	0.31	APOM	0.28	CSNK2B	0.27	C6orf47	0.26	BAG6	0.26
Breast_SE_1989	PPT2-EGFL8	0.32	PRRT1	0.28	LOC100507547	0.28	STK19	0.22	MIR1236	0.22	NELFE	0.21	PPT2	0.2	CFB	0.16	DXO	0.14	SKIV2L	0.11
Breast_SE_1990	PSMB9	0.72	PSMB8	0.65	TAP1	0.63	PSMB8-AS1	0.62	TAP2	0.49	HLA-DMA	0.4	HLA-DOB	0.37	HLA-DQA1	0.32	COL11A2	0.28	HLA-DRB6	0.26
Breast_SE_1991	HLA-DMB	0.24	LOC100294145	0.18	COL11A2	0.16	HLA-DRB1	0.16	HLA-DMA	0.11	RXRB	0.03	HLA-DQB1	0.03	MIR3135B	0	HLA-DQA1	0	HLA-DPB2	0
Breast_SE_1992	MIR6834	0.64	PFDN6	0.47	ZBTB22	0.45	RING1	0.35	MIR6873	0.31	RXRB	0.3	SLC39A7	0.28	WDR46	0.28	DAXX	0.23	HLA-DPB2	0.14
Breast_SE_1993	ZBTB22	0.56	VPS52	0.52	RGL2	0.49	HCG25	0.45	B3GALT4	0.44	MIR6834	0.42	PFDN6	0.34	MIR6873	0.3	DAXX	0.23	KIFC1	0.18
Breast_SE_1994	SYNGAP1	0.52	MIR6834	0.48	PFDN6	0.44	CUTA	0.43	MIR5004	0.38	ZBTB22	0.34	VPS52	0.28	PHF1	0.26	WDR46	0.25	MIR219A1	0.23
Breast_SE_1995	UQCC2	0.46	ITPR3	0.4	CUTA	0.29	ZBTB22	0.23	RGL2	0.21	GGNBP1	0.19	IP6K3	0.17	MIR3934	0.12	LINC00336	0.1	ZBTB9	0.02
Breast_SE_1996	UQCC2	0.48	MIR7159	0.45	GRM4	0.44	LINC01016	0.34	GGNBP1	0.22	NUDT3	0.18	MLN	0.14	ZBTB9	0.09	MIR1275	0	MIR3934	0
Breast_SE_1997	HMGA1	0.77	MIR6835	0.63	SNRPC	0.31	LOC101929243	0.13	RPS10	0.13	RPS10-NUDT3	0.12	IP6K3	0.1	NUDT3	0.09	SPDEF	0	MIR1275	0
Breast_SE_1999	SPDEF	0.93	PACSIN1	0.77	LOC101929243	0.44	TAF11	0.42	NUDT3	0.37	MIR7159	0.36	LINC01016	0.26	GRM4	0.26	ANKS1A	0.25	C6orf106	0.24
Breast_SE_2000	ZNF76	0.36	PACSIN1	0.31	SPDEF	0.3	UHRF1BP1	0.29	LOC101929243	0.24	C6orf106	0.18	TAF11	0.18	ANKS1A	0.16	SCUBE3	0.14	DEF6	0.05
Breast_SE_2002	TEAD3	0.82	PPARD	0.53	ANKS1A	0.5	LOC101929243	0.49	UHRF1BP1	0.43	FKBP5	0.42	ARMC12	0.41	ZNF76	0.41	DEF6	0.41	TULP1	0.38
Breast_SE_2004	FKBP5	0.68	ARMC12	0.56	DEF6	0.55	LOC285847	0.54	TEAD3	0.39	CLPSL2	0.39	CLPS	0.3	ZNF76	0.28	FANCE	0.27	LHFPL5	0.27
Breast_SE_2005	CLPSL1	0.72	CLPS	0.71	LHFPL5	0.67	CLPSL2	0.66	TULP1	0.57	TEAD3	0.55	MAPK13	0.55	LOC285847	0.5	ARMC12	0.48	DEF6	0.26
Breast_SE_2006	MAPK13	0.83	CLPSL2	0.54	BRPF3	0.42	MIR3925	0.31	CLPS	0.17	SLC26A8	0.16	ARMC12	0.15	SRPK1	0.13	LOC285847	0.09	CLPSL1	0.02
Breast_SE_2007	STK38	0.69	BRPF3	0.56	KCTD20	0.5	MTCH1	0.46	C6orf89	0.33	MAPK14	0.31	MIR3925	0.28	SLC26A8	0.24	MAPK13	0.22	PXT1	0.17
Breast_SE_2008	STK38	0.61	C6orf89	0.53	MTCH1	0.38	MAPK14	0.34	MIR3925	0.31	BRPF3	0.3	PI16	0.27	KCTD20	0.24	C6orf222	0.24	ETV7	0.22
Breast_SE_2009	STK38	0.45	C6orf89	0.3	MTCH1	0.28	TBC1D22B	0.26	TMEM217	0.25	PI16	0.23	KCTD20	0.19	C6orf222	0.15	PXT1	0.14	RNF8	0.04
Breast_SE_2010	STK38	0.59	TBC1D22B	0.5	TMEM217	0.49	MTCH1	0.47	C6orf89	0.39	CMTR1	0.37	KCTD20	0.36	PXT1	0.36	PPIL1	0.34	PI16	0.32
Breast_SE_2011	TMEM217	0.59	TBC1D22B	0.5	C6orf89	0.5	CMTR1	0.48	MTCH1	0.42	ZFAND3	0.39	MIR3925	0.32	MDGA1	0.31	RNF8	0.25	PI16	0.22
Breast_SE_2012	FGD2	0.77	SRSF3	0.43	TMEM217	0.41	PI16	0.35	TBC1D22B	0.32	RNF8	0.3	C6orf89	0.17	PIM1	0.14	CPNE5	0.03	RAB44	0
Breast_SE_2013	MDGA1	0.41	PIM1	0.41	CPNE5	0.34	PPIL1	0.23	TBC1D22B	0.14	MTCH1	0.12	CMTR1	0.11	TMEM217	0.06	FGD2	0.03	RNF8	0.01
Breast_SE_2014	ZFAND3	0.7	TBC1D22B	0.67	MTCH1	0.65	CMTR1	0.54	C6orf89	0.46	BTBD9	0.41	PI16	0.31	RNF8	0.31	TMEM217	0.29	GLO1	0.28
Breast_SE_2016	RNF8	0.29	CMTR1	0.23	MDGA1	0.19	ZFAND3	0.15	GLO1	0.13	BTBD9	0.1	KCNK16	0.09	CCDC167	0.06	TBC1D22B	0.05	TMEM217	0.04
Breast_SE_2017	KCNK5	0.76	SAYSD1	0.46	LRFN2	0.36	KCNK16	0.24	CCDC167	0.22	BTBD9	0.13	GLP1R	0.07	LINC00951	0.02	MIR4462	0	KIF6	0
Breast_SE_2018	MOCS1	0.59	TDRG1	0.43	SAYSD1	0.39	KCNK16	0.36	LOC100505635	0.34	DAAM2	0.33	LRFN2	0.26	OARD1	0.2	KIF6	0.2	LOC101929555	0.19
Breast_SE_2019	LOC101929555	0.76	ADCY10P1	0.43	OARD1	0.36	TDRG1	0.32	TREM1	0.14	TSPO2	0.12	APOBEC2	0.09	FOXP4	0.09	NFYA	0.05	UNC5CL	0.01
Breast_SE_2022	UNC5CL	0.59	OARD1	0.58	FOXP4	0.54	LRFN2	0.44	APOBEC2	0.44	NFYA	0.42	LOC101929555	0.42	MIR4641	0.39	TSPO2	0.27	ADCY10P1	0.24
Breast_SE_2023	FOXP4	0.75	MIR4641	0.72	LINC01276	0.7	NCR2	0.61	NFYA	0.44	FRS3	0.41	PRICKLE4	0.33	APOBEC2	0.25	OARD1	0.24	TFEB	0.22
Breast_SE_2024	TFEB	0.62	FRS3	0.51	CCND3	0.49	PRICKLE4	0.48	TAF8	0.47	MED20	0.44	TREML4	0.38	BYSL	0.32	MDFI	0.32	FOXP4	0.28
Breast_SE_2025	TAF8	0.46	TRERF1	0.32	FRS3	0.3	GUCA1B	0.25	MED20	0.23	CCND3	0.22	MRPS10	0.19	PRICKLE4	0.14	USP49	0.12	BYSL	0.12
Breast_SE_2026	C6orf132	0.76	PRICKLE4	0.5	MIR4641	0.42	TAF8	0.42	UBR2	0.41	FOXP4	0.34	CCND3	0.31	PGC	0.25	FRS3	0.2	MDFI	0.18
Breast_SE_2027	TBCC	0.26	CCND3	0.25	MRPS10	0.25	TFEB	0.22	ATP6V0CP3	0.1	TOMM6	0.04	GUCA1B	0.02	PGC	0.02	MED20	0.02	FRS3	0.02
Breast_SE_2028	CNPY3	0.56	PPP2R5D	0.41	RPL7L1	0.36	TBCC	0.31	C6orf226	0.29	MRPS10	0.15	CCND3	0.12	PTCRA	0.02	BYSL	0.02	MED20	0
Breast_SE_2030	KLHDC3	0.58	C6orf226	0.55	CUL7	0.51	PPP2R5D	0.51	CUL9	0.5	SRF	0.44	CNPY3	0.42	TBCC	0.39	UBR2	0.39	KLC4	0.33
Breast_SE_2031	KLHDC3	0.58	C6orf226	0.55	PPP2R5D	0.52	CUL7	0.52	CUL9	0.5	SRF	0.45	CNPY3	0.42	UBR2	0.4	TBCC	0.4	KLC4	0.33
Breast_SE_2032	KLHDC3	0.71	TBCC	0.58	MEA1	0.51	RRP36	0.46	PPP2R5D	0.45	RPL7L1	0.42	CUL9	0.38	SRF	0.37	CNPY3	0.32	PEX6	0.31
Breast_SE_2033	C6orf226	0.57	CUL9	0.56	CUL7	0.51	PEX6	0.5	PPP2R5D	0.46	KLHDC3	0.45	SRF	0.4	CNPY3	0.37	KLC4	0.36	UBR2	0.31
Breast_SE_2034	PPP2R5D	0.62	CUL7	0.57	KLHDC3	0.56	PEX6	0.54	CNPY3	0.51	CUL9	0.51	C6orf226	0.49	SRF	0.45	RRP36	0.41	MEA1	0.38
Breast_SE_2035	CUL9	0.67	PTK7	0.64	PEX6	0.54	KLHDC3	0.51	PPP2R5D	0.45	KLC4	0.42	CNPY3	0.4	CUL7	0.38	RRP36	0.35	C6orf226	0.31
Breast_SE_2036	SRF	0.79	PPP2R5D	0.67	CNPY3	0.62	RRP36	0.52	MEA1	0.5	PTK7	0.4	PTCRA	0.35	CUL9	0.31	KLHDC3	0.29	MRPL2	0.26
Breast_SE_2037	POLH	0.64	CUL9	0.61	TJAP1	0.55	XPO5	0.55	ABCC10	0.49	YIPF3	0.47	DLK2	0.42	SRF	0.41	ZNF318	0.37	DNPH1	0.32
Breast_SE_2038	GTPBP2	0.48	ZNF318	0.42	POLH	0.41	XPO5	0.37	VEGFA	0.34	DNPH1	0.26	YIPF3	0.24	RSPH9	0.22	ABCC10	0.21	POLR1C	0.14
Breast_SE_2039	LOC101929705	0.39	VEGFA	0.35	LINC01512	0.32	MIR6780B	0.27	C6orf223	0.26	ABCC10	0.24	TJAP1	0.23	POLR1C	0.22	ZNF318	0.18	GTPBP2	0.08
Breast_SE_2040	C6orf223	0.59	VEGFA	0.59	GTPBP2	0.54	TJAP1	0.42	POLH	0.31	CAPN11	0.27	ABCC10	0.27	LINC01512	0.19	POLR1C	0.13	TMEM63B	0.13
Breast_SE_2041	CAPN11	0.49	LOC101929705	0.4	C6orf223	0.35	AARS2	0.32	VEGFA	0.31	TMEM63B	0.3	SLC29A1	0.21	SLC35B2	0.19	MRPL14	0.13	MIR4647	0.07
Breast_SE_2042	RUNX2	0.53	SUPT3H	0.47	CDC5L	0.35	TMEM151B	0.33	MRPL14	0.22	HSP90AB1	0.19	MIR4647	0.12	MIR586	0	LOC101929705	0	AARS2	0
Breast_SE_2043	RUNX2	0.91	SUPT3H	0.78	HSP90AB1	0.51	SLC35B2	0.33	MIR4647	0.24	LOC101926898	0.24	RCAN2	0.23	TMEM151B	0.17	NFKBIE	0.1	CYP39A1	0.01
Breast_SE_2046	SLC25A27	0.51	CLIC5	0.32	CYP39A1	0.25	ENPP5	0.23	ENPP4	0.21	TDRD6	0.2	TNFRSF21	0.11	LOC101926962	0.11	PLA2G7	0.09	RCAN2	0.03
Breast_SE_2049	C6orf141	0.63	PTCHD4	0.22	DEFB112	0.22	CENPQ	0.2	OPN5	0.1	TFAP2B	0.03	DEFB133	0	DEFB114	0	DEFB113	0	DEFB110	0
Breast_SE_2050	TFAP2B	0.82	CRISP3	0.75	PGK2	0.57	LOC101927020	0.53	RHAG	0.52	CRISP2	0.52	LOC101927048	0.51	PKHD1	0.32	LOC101927082	0.21	TFAP2D	0.11
Breast_SE_2051	TFAP2B	0.51	GSTA2	0.51	GSTA5	0.5	EFHC1	0.26	IL17F	0.25	TRAM2-AS1	0.22	GSTA1	0.2	LOC730101	0.15	GSTA7P	0.12	PKHD1	0.1
Breast_SE_2052	TRAM2	0.79	LOC730101	0.76	EFHC1	0.6	TRAM2-AS1	0.6	ICK	0.55	TMEM14A	0.41	PAQR8	0.4	GSTA4	0.33	FBXO9	0.33	GSTA7P	0.25
Breast_SE_2053	ICK	0.71	TRAM2-AS1	0.52	FBXO9	0.5	ELOVL5	0.46	TRAM2	0.41	LOC730101	0.4	TMEM14A	0.33	GSTA4	0.24	GSTA7P	0.23	GSTA2	0.16
Breast_SE_2054	ELOVL5	0.8	FBXO9	0.57	MIR5685	0.48	GSTA2	0.42	GSTA3	0.4	GSTA5	0.4	GCLC	0.37	TMEM14A	0.36	LOC730101	0.35	ICK	0.33
Breast_SE_2056	GCLC	0.51	KLHL31	0.49	LRRC1	0.42	LOC101927136	0.29	GSTA3	0.29	GSTA5	0.27	MLIP-IT1	0.23	ELOVL5	0.2	RPS16P5	0.19	GSTA2	0.18
Breast_SE_2057	LRRC1	0.85	KLHL31	0.58	GCLC	0.47	FBXO9	0.42	RPS16P5	0.31	GSTA3	0.28	LOC101927189	0.26	GSTA5	0.25	MLIP-IT1	0.25	GCM1	0.25
Breast_SE_2059	FAM83B	0.76	BMP5	0.49	COL21A1	0.34	HMGCLL1	0.31	KLHL31	0.27	RPS16P5	0.17	LOC101927189	0.14	TINAG	0.09	MLIP	0.09	GFRAL	0.08
Breast_SE_2060	MIR548U	0.62	BMP5	0.19	FAM83B	0.16	DST	0.12	LOC101927211	0.08	LOC100506188	0.05	BAG2	0	HCRTR2	0	GFRAL	-0.1	HMGCLL1	-0.1
Breast_SE_2062	DST	0.71	LOC101930010	0.53	BAG2	0.3	RAB23	0.29	LOC101927211	0.27	KIAA1586	0.22	PRIM2	0.22	MIR548U	0.19	GUSBP4	0.17	BMP5	0.16
Breast_SE_2063	BAG2	0.7	RAB23	0.6	LOC101927211	0.55	KIAA1586	0.53	BEND6	0.45	COL21A1	0.39	ZNF451	0.37	DST	0.29	LOC100506188	0.29	PRIM2	0.26
Breast_SE_2067	PHF3	0.65	PTP4A1	0.6	LOC101927211	0.3	MIR548U	0.29	BAG2	0.2	LMBRD1	0.11	KHDRBS2	0.11	ZNF451	0	LOC102723883	0	PRIM2	0
Breast_SE_2069	LINC00472	0.65	OGFRL1	0.5	MIR30C2	0.42	MIR30A	0.32	FAM135A	0.28	KCNQ5-IT1	0.27	B3GAT2	0.22	KHDC1	0.16	KHDC1L	0.16	KCNQ5-AS1	0.14
Breast_SE_2075	MB21D1	0.73	KHDC1	0.56	MTO1	0.46	DDX43	0.27	OOEP	0.25	KCNQ5	0.24	KCNQ5-IT1	0.22	EEF1A1	0.17	COX7A2	0.16	COL12A1	0.15
Breast_SE_2076	MTO1	0.26	SLC17A5	0.24	LOC101928516	0.16	MB21D1	0.14	DPPA5	0.12	KHDC1	0.08	COX7A2	0.08	KHDC1L	0.06	KCNQ5	0.02	COL12A1	0.01
Breast_SE_2077	SLC17A5	0.37	MTO1	0.37	LOC101928516	0.36	MB21D1	0.33	COL12A1	0.26	KCNQ5-IT1	0.16	KHDC1	0.16	KCNQ5	0.15	EEF1A1	0.12	LOC101928489	0.12
Breast_SE_2082	COL12A1	0.85	TMEM30A	0.52	CD109	0.35	LOC101928489	0.32	FILIP1	0.28	LOC101928516	0.24	EEF1A1	0.23	MB21D1	0.17	LOC101928540	0.09	MTO1	0.08
Breast_SE_2088	FAM46A	0.76	PRSS35	0.33	SNAP91	0.27	MRAP2	0.21	CEP162	0.14	IBTK	0.13	RWDD2A	0.07	ELOVL4	0.01	TTK	0	CYB5R4	0
Breast_SE_2089	FAM46A	0.43	ELOVL4	0.36	RIPPLY2	0.24	TPBG	0.22	CYB5R4	0.21	SNAP91	0.21	UBE3D	0.2	MRAP2	0.16	PGM3	0.15	IBTK	0.07
Breast_SE_2090	TPBG	0.72	UBE3D	0.31	IBTK	0.28	ME1	0.22	FAM46A	0.21	CYB5R4	0.2	ELOVL4	0.15	DOPEY1	0.14	TBX18	0.11	TTK	0.1
Breast_SE_2093	TBX18	0.92	SNAP91	0.47	MRAP2	0.46	PGM3	0.4	CEP162	0.4	PRSS35	0.3	UBE3D	0.23	RWDD2A	0.23	CYB5R4	0.21	RIPPLY2	0.2
Breast_SE_2094	NT5E	0.63	CEP162	0.43	SNAP91	0.41	SNORD50A	0.34	SNORD50B	0.31	C6orf163	0.29	SYNCRIP	0.24	SNX14	0.24	ZNF292	0.2	SNHG5	0.09
Breast_SE_2095	SYNCRIP	0.58	RARS2	0.56	ZNF292	0.54	ORC3	0.42	GJB7	0.4	SNX14	0.36	SLC35A1	0.34	C6orf163	0.31	HTR1E	0.3	TBX18	0.29
Breast_SE_2096	CEP162	0.76	SYNCRIP	0.6	RARS2	0.57	ORC3	0.42	GJB7	0.4	SNX14	0.37	SLC35A1	0.35	C6orf163	0.3	HTR1E	0.3	TBX18	0.29
Breast_SE_2098	GJB7	0.37	SLC35A1	0.33	C6orf163	0.23	CGA	0.2	AKIRIN2	0.16	LOC101928911	0.14	HTR1E	0.14	PNRC1	0.14	RARS2	0.07	SRSF12	0.04
Breast_SE_2099	PNRC1	0.62	CASP8AP2	0.54	SRSF12	0.34	RRAGD	0.29	LYRM2	0.23	GABRR1	0.11	PM20D2	0.11	BACH2	0.1	CNR1	0.07	GABRR2	0.05
Breast_SE_2102	POU3F2	0.41	MCHR2-AS1	0.37	SIM1	0.32	FBXL4	0.31	ASCC3	0.26	GRIK2	0.19	COQ3	0.15	USP45	0.1	TSTD3	0.09	MMS22L	0.08
Breast_SE_2103	SIM1	0.79	GRIK2	0.29	CCNC	0.28	MCHR2	0.28	TSTD3	0.26	POU3F2	0.23	MCHR2-AS1	0.18	COQ3	0.13	LOC101927314	0.08	KLHL32	0.06
Breast_SE_2107	PREP	0.65	HACE1	0.48	BVES	0.42	CD24	0.37	SEC63	0.35	POPDC3	0.27	MIR587	0.25	BVES-AS1	0.21	OSTM1-AS1	0.2	RTN4IP1	0.12
Breast_SE_2109	HACE1	0.39	PREP	0.38	CD24	0.29	BVES	0.23	BVES-AS1	0.21	POPDC3	0.2	OSTM1-AS1	0.19	PRDM1	0.11	MIR587	0.1	SEC63	0.04
Breast_SE_2112	POPDC3	0.48	PRDM1	0.47	OSTM1	0.38	ATG5	0.37	BVES	0.3	PREP	0.2	PDSS2	0.18	MIR587	0.15	HACE1	0.12	SEC63	0.12
Breast_SE_2115	RTN4IP1	0.85	QRSL1	0.83	CD24	0.54	C6orf203	0.44	OSTM1-AS1	0.15	PDSS2	0.02	PREP	0	MIR587	0	SCML4	0	LIN28B	0
Breast_SE_2116	POPDC3	0.34	RTN4IP1	0.34	PRDM1	0.26	ATG5	0.23	QRSL1	0.22	BVES	0.21	MIR587	0.2	CD24	0.2	BVES-AS1	0.19	SEC63	0.13
Breast_SE_2118	CD24	0.47	OSTM1-AS1	0.4	PDSS2	0.35	MIR587	0.3	BEND3	0.24	C6orf203	0.13	SEC63	0.1	PREP	0	RTN4IP1	-0.1	POPDC3	-0.1
Breast_SE_2119	CD24	0.56	PDSS2	0.45	OSTM1-AS1	0.35	MIR587	0.34	FOXO3	0.34	BEND3	0.26	PREP	0.23	SEC63	0.22	C6orf203	0.12	SOBP	0.07
Breast_SE_2120	CD24	0.9	BEND3	0.48	PDSS2	0.4	C6orf203	0.38	RTN4IP1	0.32	QRSL1	0.3	PREP	0.26	MIR587	0.25	FOXO3	0.25	OSTM1-AS1	0.24
Breast_SE_2121	C6orf203	0.71	QRSL1	0.65	RTN4IP1	0.6	CD24	0.48	PDSS2	0.29	SOBP	0.22	ARMC2	0.21	BEND3	0.1	MIR587	0.07	SCML4	0.02
Breast_SE_2127	FOXO3	0.61	AK9	0.55	ZBTB24	0.41	ARMC2	0.39	CD164	0.39	SEC63	0.27	SMPD2	0.25	SESN1	0.24	PPIL6	0.18	SNX3	0.08
Breast_SE_2130	AK9	0.76	PPIL6	0.53	ARMC2	0.49	CCDC162P	0.47	CD164	0.46	ZBTB24	0.37	GPR6	0.36	FOXO3	0.3	CDC40	0.3	SESN1	0.29
Breast_SE_2131	ZBTB24	0.5	MICAL1	0.48	CEP57L1	0.39	ARMC2	0.37	WASF1	0.37	METTL24	0.29	SMPD2	0.26	CDC40	0.25	PPIL6	0.21	FIG4	0.1
Breast_SE_2132	AK9	0.8	FIG4	0.7	CD164	0.54	CDK19	0.53	CCDC162P	0.42	AMD1	0.41	CDC40	0.4	SMPD2	0.36	ARMC2	0.36	ZBTB24	0.33
Breast_SE_2135	CDK19	0.49	SLC16A10	0.42	SLC22A16	0.4	AMD1	0.35	METTL24	0.2	WASF1	0.15	MICAL1	0.15	GSTM2P1	0.05	TRAF3IP2-AS1	0.03	GTF3C6	0.01
Breast_SE_2137	CDK19	0.72	WASF1	0.54	AMD1	0.46	SLC16A10	0.43	FIG4	0.4	SLC22A16	0.36	REV3L	0.34	TRAF3IP2-AS1	0.31	GTF3C6	0.2	CDC40	0.2
Breast_SE_2138	METTL24	0.51	REV3L	0.38	SLC16A10	0.3	TRAF3IP2-AS1	0.28	GTF3C6	0.26	RPF2	0.24	SLC22A16	0.24	GSTM2P1	0.19	DDO	0.17	TUBE1	0.16
Breast_SE_2139	CDC40	0.72	TRAF3IP2-AS1	0.6	GTF3C6	0.56	REV3L	0.48	CDK19	0.32	SLC22A16	0.29	TRAF3IP2	0.26	METTL24	0.25	AMD1	0.21	SLC16A10	0.2
Breast_SE_2140	FYN	0.37	REV3L	0.35	CDK19	0.26	FAM229B	0.22	TRAF3IP2-AS1	0.16	LAMA4	0.15	GSTM2P1	0.12	LOC101927640	0.04	TRAF3IP2	0.02	SLC22A16	0
Breast_SE_2142	LAMA4	0.68	LOC101927640	0.55	TRAF3IP2-AS1	0.35	MARCKS	0.23	FAM229B	0.18	RPF2	0.11	FYN	0.09	SLC22A16	0.03	CDK19	0.02	RFPL4B	0.01
Breast_SE_2144	LAMA4	0.29	FRK	0.27	LOC101927640	0.26	TRAF3IP2-AS1	0.15	GSTM2P1	0.12	RFPL4B	0.06	GTF3C6	0.04	MARCKS	0.03	RPF2	0.01	FLJ34503	0
Breast_SE_2145	MARCKS	0.58	LOC101927640	0.45	RFPL4B	0.33	LAMA4	0.29	FAM229B	0.24	FLJ34503	0.14	COL10A1	0.13	FRK	0.04	TRAF3IP2-AS1	0.03	LINC01268	0
Breast_SE_2146	MARCKS	0.83	FAM229B	0.42	RFPL4B	0.36	HDAC2	0.25	FRK	0.23	LINC01268	0.2	FLJ34503	0.18	COL10A1	0.18	LAMA4	0.16	TRAF3IP2-AS1	0.13
Breast_SE_2148	DSE	0.84	LOC100287467	0.79	DCBLD1	0.63	ROS1	0.44	TPI1P3	0.3	GOPC	0.29	TRAPPC3L	0.23	FAM162B	0.14	VGLL2	0	RSPH4A	-0.1
Breast_SE_2149	DCBLD1	0.68	GOPC	0.66	LOC101927919	0.55	CEP85L	0.51	ROS1	0.49	LOC100287467	0.49	DSE	0.36	TRAPPC3L	0.26	BRD7P3	0.2	GPRC6A	0.15
Breast_SE_2151	ASF1A	0.53	SLC35F1	0.41	MCM9	0.34	RFX6	0.27	GOPC	0.26	VGLL2	0.25	FAM184A	0.16	CEP85L	0.12	BRD7P3	0.11	GPRC6A	0.11
Breast_SE_2152	RNF217	0.79	RNF217-AS1	0.72	TRMT11	0.34	NCOA7	0.22	ECHDC1	0.17	FABP7	0.17	CLVS2	0.15	TRDN	0.12	LOC100126584	0.11	SMPDL3A	0.07
Breast_SE_2154	TPD52L1	0.85	HINT3	0.39	RNF217-AS1	0.34	HEY2	0.34	RNF146	0.3	MIR588	0.28	LOC100126584	0.26	HDDC2	0.22	NCOA7	0.17	NKAIN2	0.15
Breast_SE_2155	NKAIN2	0.95	MIR588	0.7	HEY2	0.37	NCOA7	0.32	TRMT11	0.27	RNF146	0.19	SOGA3	0.14	HINT3	0.09	KIAA0408	0.07	RNF217-AS1	0.07
Breast_SE_2156	NCOA7	0.48	HEY2	0.46	NKAIN2	0.46	RNF146	0.42	RNF217-AS1	0.34	CENPW	0.33	HINT3	0.31	HDDC2	0.25	TRMT11	0.23	MIR588	0.22
Breast_SE_2157	SOGA3	0.46	KIAA0408	0.43	NCOA7	0.42	MIR588	0.33	RNF146	0.32	NKAIN2	0.28	LOC100126584	0.16	RNF217-AS1	0.15	THEMIS	0.09	ECHDC1	0.09
Breast_SE_2161	PTPRK	0.48	LOC101928140	0.43	MIR588	0.38	KIAA0408	0.31	SOGA3	0.3	EPB41L2	0.21	CENPW	0.18	SMLR1	0.14	ECHDC1	0.04	RSPO3	0.04
Breast_SE_2162	PTPRK	0.63	LOC101928140	0.6	MIR588	0.37	KIAA0408	0.3	SOGA3	0.27	CENPW	0.25	LAMA2	0.21	EPB41L2	0.18	RNF146	0.18	THEMIS	0.18
Breast_SE_2164	ARHGAP18	0.76	L3MBTL3	0.32	LAMA2	0.3	ENPP1	0.29	TMEM244	0.26	THEMIS	0.23	AKAP7	0.19	EPB41L2	0.16	ARG1	0.16	MIR548H5	0
Breast_SE_2167	SLC2A12	0.49	TBPL1	0.27	LOC101928231	0.15	HBS1L	0.15	SNORD101	0.03	MIR4459	0	LINC01010	0	SGK1	0	SNORA33	0	SNORD100	0
Breast_SE_2169	LOC101928304	0.32	SGK1	0.3	TCF21	0.21	LOC101928231	0.13	SLC2A12	0.06	TBPL1	0	MIR548A2	0	MIR4459	0	LINC00271	0	AHI1	0
Breast_SE_2171	MYB	0.82	MAP7	0.66	LINC00271	0.59	HMGA1P7	0.52	MIR3662	0.49	BCLAF1	0.27	ALDH8A1	0.24	MTFR2	0.23	LOC101928231	0.19	TBPL1	0.07
Breast_SE_2173	MAP3K5	0.72	IL22RA2	0.27	LINC00271	0.23	LOC102723649	0.22	PERP	0.17	PEX7	0.15	MAP7	0.15	LOC101928429	0.13	IL20RA	0.12	LOC101928461	0.05
Breast_SE_2174	IL20RA	0.79	NHEG1	0.48	PBOV1	0.41	LOC102723649	0.35	MAP7	0.34	IL22RA2	0.31	MAP3K5	0.28	LOC100130476	0.26	PEX7	0.21	PERP	0.18
Breast_SE_2175	IL22RA2	0.62	IFNGR1	0.47	LOC102723649	0.38	MAP3K5	0.37	OLIG3	0.36	IL20RA	0.3	PEX7	0.11	MAP7	0.11	PERP	0.06	SLC35D3	0.06
Breast_SE_2176	TNFAIP3	0.5	LOC101928429	0.31	OLIG3	0.26	MIR3145	0.22	SLC35D3	0.21	FLJ46906	0.13	LOC100130476	0.05	ECT2L	0	CCDC28A	0	LOC102723649	-0.1
Breast_SE_2178	PERP	0.7	NHSL1	0.61	HECA	0.51	IL22RA2	0.43	ABRACL	0.42	OLIG3	0.37	REPS1	0.36	ECT2L	0.33	IL20RA	0.31	PBOV1	0.29
Breast_SE_2179	HEBP2	0.61	NHSL1	0.5	ABRACL	0.5	HECA	0.48	TXLNB	0.43	ECT2L	0.36	FLJ46906	0.32	PBOV1	0.28	IL20RA	0.27	PERP	0.23
Breast_SE_2181	HEBP2	0.63	REPS1	0.48	HECA	0.47	ABRACL	0.46	CCDC28A	0.43	NHSL1	0.39	PERP	0.36	PBOV1	0.33	ECT2L	0.32	FLJ46906	0.21
Breast_SE_2182	CITED2	0.51	PBOV1	0.46	HECA	0.42	HEBP2	0.38	ECT2L	0.38	TXLNB	0.33	CCDC28A	0.29	LOC100132735	0.2	ABRACL	0.19	FLJ46906	0.11
Breast_SE_2185	CITED2	0.51	LOC100507477	0.43	LOC103352541	0.36	FLJ46906	0.12	MIR3145	0.09	LOC100132735	0.08	CCDC28A	0.02	MIR3668	0	MIR4465	0	VTA1	0
Breast_SE_2186	NMBR	0.38	VTA1	0.31	SF3B5	0.28	LINC01277	0.16	PEX3	0.1	ADAT2	0.05	LTV1	0.04	AIG1	0.03	LOC103352541	0.01	MIR4465	0
Breast_SE_2187	HIVEP2	0.69	ZC2HC1B	0.46	LINC01277	0.29	PHACTR2	0.24	LTV1	0.22	LOC153910	0.2	PEX3	0.15	VTA1	0.11	AIG1	0.09	EPM2A	0.06
Breast_SE_2190	UTRN	0.71	FBXO30	0.57	FUCA2	0.4	STX11	0.36	LTV1	0.32	PHACTR2	0.28	SF3B5	0.27	GRM1	0.24	HYMAI	0.22	ADAT2	0.2
Breast_SE_2191	STXBP5	0.81	STXBP5-AS1	0.54	GINM1	0.51	FBXO30	0.5	RAB32	0.45	UST	0.45	PPIL4	0.26	LOC100507557	0.17	GRM1	0.16	EPM2A	0.14
Breast_SE_2192	SASH1	0.75	LOC645967	0.32	ADGB	0.24	TAB2	0.22	NUP43	0.17	LRP11	0.16	LATS1	0.03	PPIL4	0	LOC101928661	0	UST	0
Breast_SE_2193	GINM1	0.33	PCMT1	0.33	UST	0.32	RAET1G	0.16	ZC3H12D	0.15	KATNA1	0.11	LRP11	0.11	ULBP2	0.08	NUP43	0.04	RAET1E-AS1	0.04
Breast_SE_2194	TAB2	0.55	LATS1	0.39	RAET1K	0.27	RPS18P9	0.25	LRP11	0.11	KATNA1	0.11	ZC3H12D	0.1	RAET1E	0.04	GINM1	0.02	RAET1G	0
Breast_SE_2195	TAB2	0.53	LATS1	0.38	RPS18P9	0.29	RAET1K	0.28	LRP11	0.16	RAET1E	0.1	ZC3H12D	0.09	KATNA1	0.09	RAET1G	0.07	GINM1	0.06
Breast_SE_2196	LRP11	0.39	RAET1E-AS1	0.29	ZC3H12D	0.24	PPP1R14C	0.23	PPIL4	0.19	ULBP3	0.16	NUP43	0.15	RAET1L	0.15	ULBP2	0.11	RPS18P9	0.1
Breast_SE_2199	PLEKHG1	0.72	RAET1L	0.54	PPP1R14C	0.53	RAET1E-AS1	0.21	IYD	0.07	LRP11	0	ULBP2	0	LOC102723831	-0.1	RAET1G	-0.1	CCDC170	-0.1
Breast_SE_2200	MTHFD1L	0.59	AKAP12	0.41	RAET1G	0.37	PPP1R14C	0.33	RAET1L	0.28	RAET1K	0.23	PLEKHG1	0.21	RAET1E-AS1	0.21	ULBP2	0.16	LRP11	0.11
Breast_SE_2201	AKAP12	0.51	ULBP3	0.33	RAET1G	0.26	RAET1E	0.26	SYNE1	0.19	MTHFD1L	0.17	RAET1E-AS1	0.04	ULBP2	0.04	RAET1K	0	LRP11	0
Breast_SE_2202	RMND1	0.68	CCDC170	0.66	ESR1	0.48	ZBTB2	0.43	RAET1K	0.23	ULBP1	0.18	LOC102723831	0.12	AKAP12	0.11	MTHFD1L	0.08	MYCT1	0.06
Breast_SE_2204	CCDC170	0.85	ESR1	0.85	RMND1	0.65	ZBTB2	0.29	FBXO5	0.24	MTRF1L	0.19	IYD	0.16	RAET1K	0.12	RGS17	0.09	SYNE1	0
Breast_SE_2205	ESR1	0.93	CCDC170	0.83	RMND1	0.65	ZBTB2	0.53	MTRF1L	0.27	FBXO5	0.14	IYD	0.04	RGS17	0	AKAP12	0	RAET1K	0
Breast_SE_2207	ULBP3	0.27	ESR1	0.24	PPP1R14C	0.22	CCDC170	0.13	RGS17	0.09	RMND1	0.08	SYNE1	0.03	IYD	0.02	VIP	0	MYCT1	0
Breast_SE_2208	CNKSR3	0.84	TIAM2	0.55	IPCEF1	0.41	SYNE1-AS1	0.4	MTRF1L	0.33	MIR4466	0.31	OPRM1	0.31	ARID1B	0.3	TFB1M	0.28	CLDN20	0.21
Breast_SE_2209	TIAM2	0.78	TFB1M	0.27	CLDN20	0.27	TMEM242	0.25	MTRF1L	0.22	VIP	0.13	MYCT1	0.12	CNKSR3	0.05	MIR1202	0	MIR3692	0
Breast_SE_2210	ARID1B	0.38	TULP4	0.37	MIR4466	0.24	ZDHHC14	0.15	SYNJ2-IT1	0.09	SYNJ2	0.07	GTF2H5	0.04	NOX3	0.04	DYNLT1	0.04	SYTL3	0.01
Breast_SE_2211	TULP4	0.52	ARID1B	0.42	SYNJ2-IT1	0.38	SYTL3	0.33	EZR-AS1	0.31	MIR3918	0.24	DYNLT1	0.21	EZR	0.2	MIR7161	0.16	MIR4466	0.08
Breast_SE_2212	GTF2H5	0.37	DYNLT1	0.33	MIR3918	0.25	SYTL3	0.2	SNX9	0.18	C6orf99	0.12	SERAC1	0.02	SYNJ2	0.02	ARID1B	0.01	MIR3692	0
Breast_SE_2213	SYNJ2	0.6	DYNLT1	0.37	SYNJ2-IT1	0.36	GTF2H5	0.32	TAGAP	0.32	RSPH3	0.28	ZDHHC14	0.26	TULP4	0.23	SERAC1	0.22	SYTL3	0.2
Breast_SE_2214	TAGAP	0.81	TULP4	0.78	SYNJ2-IT1	0.75	RSPH3	0.38	EZR-AS1	0.3	ZDHHC14	0.25	SYNJ2	0.23	DYNLT1	0.18	MIR7161	0.15	EZR	0.13
Breast_SE_2217	EZR-AS1	0.57	EZR	0.56	C6orf99	0.46	TAGAP	0.28	SYNJ2-IT1	0.28	SYTL3	0.24	LOC101929122	0.24	MIR7161	0.21	MIR3918	0.21	RSPH3	0.19
Breast_SE_2218	TAGAP	0.84	LOC101929122	0.82	FNDC1	0.68	TULP4	0.52	SNORA29	0.51	EZR-AS1	0.41	RSPH3	0.37	TCP1	0.3	SNORA20	0.26	MIR7161	0.24
Breast_SE_2220	SOD2	0.65	WTAP	0.58	LPAL2	0.27	FNDC1	0.27	LOC101929122	0.22	AIRN	0.15	LOC729603	0.14	SNORA29	0.12	TCP1	0.12	TAGAP	0.12
Breast_SE_2221	AIRN	0.34	ACAT2	0.32	FNDC1	0.32	LOC101929122	0.31	SNORA29	0.26	SNORA20	0.22	TAGAP	0.21	LOC729603	0.14	WTAP	0.11	LPAL2	0.08
Breast_SE_2225	AGPAT4	0.54	PACRG	0.39	PLG	0.36	AGPAT4-IT1	0.35	SLC22A2	0.32	MRPL18	0.28	IGF2R	0.11	TCP1	0.1	AIRN	0.07	SNORA29	0.03
Breast_SE_2227	QKI	0.63	DKFZp451B082	0.46	PRR18	0.43	C6orf118	0.33	T	0.33	MAP3K4	0.32	PACRG-AS1	0.27	PACRG	0.22	CAHM	0.21	AGPAT4-IT1	0.18
Breast_SE_2229	LINC00473	0.72	LINC00602	0.69	PDE10A	0.56	C6orf118	0.43	PRR18	0.23	T	0.16	FGFR1OP	0.13	RNASET2	0.03	GPR31	0	TCP10L2	0
Breast_SE_2231	RPS6KA2	0.7	RPS6KA2-IT1	0.4	LINC00473	0.11	LINC00602	0.11	CCR6	0.06	UNC93A	0.01	GPR31	0	TCP10L2	0	PRR18	0	LOC100289495	-0.1
Breast_SE_2233	UNC93A	0.88	TCP10	0.88	RNASET2	0.55	HGC6.3	0.22	TTLL2	0.19	MIR3939	0.17	FGFR1OP	0.12	KIF25-AS1	0.06	MPC1	0.03	TCP10L2	0
Breast_SE_2238	KIF25	0.5	CCR6	0.43	SMOC2	0.38	MIR3939	0.33	HGC6.3	0.27	FRMD1	0.24	FGFR1OP	0.15	KIF25-AS1	0.15	RPS6KA2-AS1	0.15	TCP10	0.04
Breast_SE_2239	SMOC2	0.73	UNC93A	0.58	TCP10	0.58	CCR6	0.49	LOC101929420	0.49	MIR3939	0.48	FGFR1OP	0.3	FRMD1	0.24	DACT2	0.17	HGC6.3	0.08
Breast_SE_2241	SMOC2	0.82	UNC93A	0.68	TCP10	0.67	LOC101929420	0.61	PHF10	0.37	FRMD1	0.34	C6orf120	0.25	DACT2	0.22	WDR27	0.19	HGC6.3	0.15
Breast_SE_2242	LOC101929460	0.75	THBS2	0.46	LOC101929523	0.31	DACT2	0.16	LINC00242	0.13	WDR27	0.06	PHF10	0.06	LOC102724357	0	TCTE3	0	C6orf120	0
Breast_SE_2243	THBS2	0.49	LOC101929460	0.46	LOC101929523	0.41	TCTE3	0.14	LOC102724511	0.05	DACT2	0.02	PHF10	0.02	LOC102724357	0	WDR27	0	LOC285804	0
Breast_SE_2244	PHF10	0.64	THBS2	0.29	LOC285804	0.24	C6orf120	0.16	FAM120B	0.12	TCTE3	0.12	LINC00574	0.11	WDR27	0.11	TBP	0.1	ERMARD	0.08
Breast_SE_2245	LOC100131532	0.56	DLL1	0.54	LINC00574	0.49	LINC00242	0.39	PDCD2	0.35	LOC102724511	0.34	C6orf120	0.18	LOC285804	0.12	FAM120B	0.11	TBP	0.09
Breast_SE_2246	DLL1	0.64	FAM120B	0.6	ERMARD	0.45	LINC00574	0.44	PSMB1	0.43	LINC00242	0.4	MIR4644	0.37	LOC102724511	0.26	C6orf120	0.25	TBP	0.23
Breast_SE_2248	FAM20C	0.49	ZFAND2A	0.37	LOC102723672	0.35	ADAP1	0.27	UNCX	0.24	LOC100507642	0.19	LOC101926963	0.14	C7orf50	0.11	COX19	0.11	LOC101927021	0.1
Breast_SE_2249	PDGFA	0.61	PRKAR1B	0.54	SUN1	0.38	ADAP1	0.36	UNCX	0.31	COX19	0.26	MIR339	0.17	FAM20C	0.17	C7orf50	0.15	ZFAND2A	0.12
Breast_SE_2250	PDGFA	0.8	LOC101926963	0.38	ZFAND2A	0.23	PRKAR1B	0.23	GPER1	0.16	COX19	0.15	UNCX	0.15	LOC102723672	0.15	FAM20C	0.09	ADAP1	0.04
Breast_SE_2251	GET4	0.71	COX19	0.58	ZFAND2A	0.51	ADAP1	0.45	LOC101927000	0.36	CYP2W1	0.36	LOC101927021	0.35	GPER1	0.27	MIR339	0.25	PRKAR1B	0.21
Breast_SE_2252	ZFAND2A	0.52	PSMG3	0.51	TMEM184A	0.46	C7orf50	0.38	MICALL2	0.35	PSMG3-AS1	0.35	MAFK	0.34	MAD1L1	0.24	CYP2W1	0.19	ELFN1-AS1	0.16
Breast_SE_2253	ELFN1	0.83	MAD1L1	0.46	UNCX	0.45	PSMG3	0.38	ZFAND2A	0.23	GPR146	0.21	SNX8	0.2	MAFK	0.16	NUDT1	0.13	MIR6836	0.12
Breast_SE_2254	CHST12	0.53	MAD1L1	0.53	SNX8	0.39	EIF3B	0.39	MIR6836	0.39	ELFN1	0.38	NUDT1	0.32	PSMG3	0.21	UNCX	0.17	ELFN1-AS1	0.17
Breast_SE_2255	PSMG3	0.59	SNX8	0.56	LFNG	0.52	PSMG3-AS1	0.46	TTYH3	0.43	BRAT1	0.41	MIR6836	0.41	NUDT1	0.36	MIR4648	0.34	GNA12	0.3
Breast_SE_2256	GNA12	0.39	LOC100129603	0.35	MIR6836	0.25	ELFN1-AS1	0.17	NUDT1	0.15	SNX8	0.06	MAD1L1	0.04	TTYH3	0.04	SDK1	0.03	ELFN1	0.02
Breast_SE_2258	LOC100129484	0.47	SLC29A4	0.24	SDK1	0.13	RBAKDN	0.05	WIPI2	0.03	TNRC18	0	RADIL	0	MMD2	0	RBAK	-0.1	ZNF890P	-0.1
Breast_SE_2259	SLC29A4	0.56	WIPI2	0.46	RNF216	0.32	FOXK1	0.32	RBAK-RBAKDN	0.3	RBAK	0.29	AP5Z1	0.29	RNF216P1	0.28	RADIL	0.24	MMD2	0.21
Breast_SE_2260	RNF216	0.68	WIPI2	0.59	TNRC18	0.58	RBAK	0.52	FBXL18	0.48	MIR6874	0.48	RNF216P1	0.44	SLC29A4	0.37	FSCN1	0.29	ACTB	0.29
Breast_SE_2261	OCM	0.32	ANKRD61	0.27	RSPH10B2	0.26	RNF216-IT1	0.24	ZNF815P	0.11	EIF2AK1	0.11	USP42	0.06	MIR6874	0.02	FAM220A	0.01	RNF216	0
Breast_SE_2262	CYTH3	0.65	ZDHHC4	0.26	AIMP2	0.2	KDELR2	0.15	RAC1	0.1	CCZ1	0.09	DAGLB	0.05	FAM220A	0.01	RSPH10B2	0	EIF2AK1	0
Breast_SE_2263	PMS2CL	0.54	ZDHHC4	0.53	RAC1	0.51	FAM220A	0.45	EIF2AK1	0.41	ZNF316	0.4	USP42	0.39	C7orf26	0.35	KDELR2	0.34	DAGLB	0.33
Breast_SE_2265	COL28A1	0.38	ZNF853	0.15	GRID2IP	0.13	LOC100131257	0.08	C1GALT1	0.06	LOC101927354	0.03	ZNF316	0.02	MIR3683	0	LOC101927391	0	ZDHHC4	-0.2
Breast_SE_2269	ARL4A	0.52	SCIN	0.31	ANKMY2	0.3	ETV1	0.3	LOC102725191	0.17	THSD7A	0.08	PHF14	0.04	LRRC72	0.03	ISPD-AS1	0.03	DGKB	0.02
Breast_SE_2270	AGMO	0.87	THSD7A	0.8	DGKB	0.61	TMEM106B	0.22	TSPAN13	0.14	ETV1	0.08	SOSTDC1	0.04	SCIN	0	AGR2	0	LOC102725191	0
Breast_SE_2275	BZW2	0.36	AGR3	0.3	ANKMY2	0.23	AGR2	0.18	LOC101927630	0.11	TWIST1	0.09	TSPAN13	0.08	SNX13	0.02	MIR1302-6	0	FERD3L	0
Breast_SE_2276	AGR2	0.69	AGR3	0.69	TSPAN13	0.42	ISPD	0.29	BZW2	0.17	ANKMY2	0.11	SNX13	0.02	AGMO	0.02	MEOX2-AS1	0.01	MIR1302-6	0
Breast_SE_2278	AHR	0.43	LOC101927630	0.33	TWIST1	0.32	SOSTDC1	0.29	ISPD-AS1	0.17	MEOX2-AS1	0.16	ANKMY2	0.15	LRRC72	0.12	HDAC9	0.11	ISPD	0.11
Breast_SE_2279	HDAC9	0.44	ANKMY2	0.3	TWIST1	0.28	LRRC72	0.24	MACC1-AS1	0.22	AGR2	0.11	TMEM196	0.05	AHR	0.03	LOC101927668	0	MACC1	0
Breast_SE_2281	TWIST1	0.89	TWISTNB	0.43	ABCB5	0.37	HDAC9	0.28	RPL23P8	0.18	TMEM196	0.18	ITGB8	0.08	LOC101927811	0.05	PRPS1L1	0.03	LOC101927769	0.02
Breast_SE_2284	LOC101927811	0.77	ITGB8	0.71	SP8	0.29	ABCB5	0.13	MACC1	0.11	LOC101927668	0.1	MIR3146	0.06	DNAH11	0.05	LOC101927769	0.04	FERD3L	0
Breast_SE_2286	LOC100506178	0.59	IL6	0.53	FAM126A	0.51	IGF2BP3	0.41	LOC401312	0.34	DNAH11	0.28	KLHL7-AS1	0.26	SNORD93	0.24	TOMM7	0.17	MALSU1	0.16
Breast_SE_2287	IL6	0.73	LOC100506178	0.63	FAM126A	0.59	LOC401312	0.43	IGF2BP3	0.41	KLHL7-AS1	0.28	TOMM7	0.22	STEAP1B	0.17	SNORD93	0.16	MALSU1	0.04
Breast_SE_2288	FAM126A	0.68	IL6	0.56	SNORD93	0.5	LOC100506178	0.48	IGF2BP3	0.37	LOC401312	0.3	STEAP1B	0.2	KLHL7-AS1	0.19	RPS2P32	0.11	TOMM7	0.07
Breast_SE_2289	IGF2BP3	0.87	LOC100506178	0.52	KLHL7-AS1	0.49	IL6	0.45	MALSU1	0.44	RPS2P32	0.37	NPY	0.27	TOMM7	0.24	STEAP1B	0.17	SNORD93	0.17
Breast_SE_2290	OSBPL3	0.66	MPP6	0.39	NFE2L3	0.29	IGF2BP3	0.2	NPY	0.07	CYCS	0.07	C7orf31	0.05	RPS2P32	0.04	STK31	-0.1	NPVF	-0.1
Breast_SE_2291	OSBPL3	0.92	MPP6	0.58	KIAA0087	0.28	NFE2L3	0.27	LOC441204	0.24	IGF2BP3	0.23	MIR148A	0.23	NPVF	0.07	CYCS	0.06	STK31	0.03
Breast_SE_2292	OSBPL3	0.55	NFE2L3	0.23	MPP6	0.19	SKAP2	0.17	C7orf31	0.09	CYCS	0.08	C7orf71	0.07	TRA2A	0	STK31	0	RPS2P32	-0.1
Breast_SE_2296	NPVF	0.43	SNX10	0.3	MIR148A	0.23	LOC441204	0.2	CBX3	0.16	KIAA0087	0.13	HOXA-AS3	0.04	HNRNPA2B1	0.04	HOXA2	0	HOXA-AS2	-0.1
Breast_SE_2298	CBX3	0.54	LOC441204	0.51	MIR148A	0.51	NFE2L3	0.47	KIAA0087	0.43	HNRNPA2B1	0.41	SNX10	0.06	SKAP2	0	HOXA6	-0.1	C7orf71	-0.1
Breast_SE_2301	HOXA5	0.84	HOXA3	0.8	HOTAIRM1	0.76	HOXA-AS2	0.75	HOXA10-AS	0.74	HOXA1	0.74	HOXA10	0.72	HOXA2	0.69	HOXA-AS3	0.64	HOXA6	0.61
Breast_SE_2302	HIBADH	0.42	TAX1BP1	0.36	HOTTIP	0.34	HOXA9	0.29	HOXA10-HOXA9	0.29	MIR196B	0.23	HOXA13	0.21	HOXA10-AS	0.16	HOXA10	0.14	HOXA6	0.13
Breast_SE_2303	TRIL	0.86	PRR15	0.71	LOC646762	0.68	LOC100506497	0.67	PLEKHA8	0.53	ZNRF2P2	0.53	DPY19L2P3	0.53	CHN2	0.5	WIPF3	0.37	LOC102724484	0.3
Breast_SE_2304	CHN2	0.83	LOC102724484	0.61	PRR15	0.44	CREB5	0.23	LOC646762	0.12	PLEKHA8	0.07	JAZF1-AS1	0.04	DPY19L2P3	0.03	LOC101928168	0	ZNRF2	0
Breast_SE_2306	SCRN1	0.84	CRHR2	0.36	MTURN	0.25	DKFZP586I1420	0.24	MIR550A1	0.19	MIR550B1	0.19	DPY19L2P3	0.18	LOC646762	0.18	GGCT	0.15	PLEKHA8	0.13
Breast_SE_2307	MTURN	0.55	LINC01176	0.36	LOC401320	0.35	DKFZP586I1420	0.26	DPY19L2P3	0.22	ZNRF2P2	0.21	FKBP14	0.17	ZNRF2	0.14	GARS	0.03	PLEKHA8	0.03
Breast_SE_2311	LINC01176	0.68	DPY19L2P3	0.6	GGCT	0.57	DKFZP586I1420	0.51	LOC401320	0.46	GHRHR	0.37	PLEKHA8	0.36	NOD1	0.26	AQP1	0.24	MTURN	0.24
Breast_SE_2312	AQP1	0.46	GHRHR	0.43	LINC01176	0.41	MTURN	0.4	LOC401320	0.39	PLEKHA8	0.36	GARS	0.34	ZNRF2	0.22	DKFZP586I1420	0.21	NOD1	0.16
Breast_SE_2313	AQP1	0.71	CRHR2	0.56	NOD1	0.4	GHRHR	0.4	CCDC129	0.31	PLEKHA8	0.28	ADCYAP1R1	0.22	INMT	0.16	GGCT	0.14	GARS	0.09
Breast_SE_2316	GHRHR	0.91	CCDC129	0.88	AQP1	0.59	MIR550A2	0.51	MIR550B2	0.51	PPP1R17	0.47	ZNRF2P1	0.36	PDE1C	0.31	CRHR2	0.27	GARS	0.15
Breast_SE_2317	PDE1C	0.86	PPP1R17	0.63	CCDC129	0.43	GHRHR	0.43	RP9P	0.41	BBS9	0.4	LINC00997	0.38	ZNRF2P1	0.33	KBTBD2	0.27	RP9	0.26
Breast_SE_2318	DPY19L1P1	0.66	AVL9	0.6	RP9	0.52	NT5C3A	0.48	KBTBD2	0.43	FKBP9	0.37	ZNRF2P1	0.34	LINC00997	0.31	BBS9	0.3	LSM5	0.23
Breast_SE_2322	BMPER	0.59	RP9P	0.59	FKBP9	0.51	LINC00997	0.43	RP9	0.42	PDE1C	0.27	NT5C3A	0.26	DPY19L1P1	0.25	KBTBD2	0.25	BBS9	0.22
Breast_SE_2324	EEPD1	0.53	LOC100506725	0.42	LOC101930085	0.4	HERPUD2	0.37	NPSR1-AS1	0.32	LOC401324	0.29	DPY19L2P1	0.28	AOAH	0.23	DPY19L1	0.2	KIAA0895	0.04
Breast_SE_2326	EEPD1	0.59	KIAA0895	0.42	AOAH	0.42	LOC401324	0.34	ANLN	0.32	DPY19L2P1	0.31	DPY19L1	0.21	TBX20	0.19	LOC101930085	0.17	HERPUD2	0.04
Breast_SE_2327	AOAH	0.57	AOAH-IT1	0.43	EEPD1	0.36	DPY19L2P1	0.27	TBX20	0.23	ANLN	0.19	KIAA0895	0.1	EPDR1	0.09	SFRP4	0.02	MIR1200	0
Breast_SE_2331	TARP	0.94	TRG-AS1	0.45	LINC00265	0.37	YAE1D1	0.15	EPDR1	0.1	RALA	0.07	STARD3NL	0.03	MIR1200	0	VPS41	0	CDK13	0
Breast_SE_2332	LINC00265	0.5	POU6F2-AS2	0.28	TRG-AS1	0.23	LINC01450	0.23	SFRP4	0.2	EPDR1	0.19	NME8	0.18	MPLKIP	0.16	POU6F2-AS1	0.16	TARP	0.16
Breast_SE_2333	VPS41	0.85	CDK13	0.75	YAE1D1	0.56	RALA	0.4	MPLKIP	0.32	GLI3	0.13	LINC01449	0.12	POU6F2-AS2	0.09	LINC00265	0.08	AMPH	0.02
Breast_SE_2335	INHBA	0.41	LINC01450	0.34	INHBA-AS1	0.29	GLI3	0.19	MPLKIP	0.19	LINC01448	0.08	SUGCT	0.02	POU6F2	0	C7orf25	0	LINC00265	0
Breast_SE_2336	INHBA	0.53	GLI3	0.44	INHBA-AS1	0.44	MPLKIP	0.41	LINC01450	0.26	C7orf25	0.19	MRPL32	0.18	POU6F2-AS2	0.14	SUGCT	0.13	YAE1D1	0.07
Breast_SE_2337	INHBA	0.65	MPLKIP	0.48	GLI3	0.43	LINC01450	0.42	MRPL32	0.4	INHBA-AS1	0.36	C7orf25	0.33	SUGCT	0.3	PSMA2	0.22	CDK13	0.2
Breast_SE_2338	INHBA	0.48	LINC01450	0.43	SUGCT	0.39	INHBA-AS1	0.37	MRPL32	0.22	MPLKIP	0.21	POU6F2-AS2	0.17	GLI3	0.06	HECW1	0.03	MIR3943	0
Breast_SE_2339	INHBA	0.78	MPLKIP	0.74	GLI3	0.56	STK17A	0.51	SUGCT	0.5	INHBA-AS1	0.5	MRPL32	0.38	C7orf25	0.33	PSMA2	0.28	LINC01450	0.2
Breast_SE_2340	URGCP-MRPS24	0.76	MRPS24	0.74	MPLKIP	0.59	STK17A	0.58	BLVRA	0.58	GLI3	0.52	PSMA2	0.48	C7orf25	0.43	SUGCT	0.4	COA1	0.4
Breast_SE_2341	GLI3	0.9	STK17A	0.45	HECW1	0.32	INHBA	0.31	BLVRA	0.23	URGCP-MRPS24	0.19	PSMA2	0.18	MRPS24	0.18	C7orf25	0.16	INHBA-AS1	0.14
Breast_SE_2342	STK17A	0.66	HECW1	0.55	DBNL	0.45	MIR6837	0.3	AEBP1	0.22	MRPL32	0.2	URGCP-MRPS24	0.19	MRPS24	0.18	RASA4CP	0.14	URGCP	0.12
Breast_SE_2343	BLVRA	0.48	POLM	0.18	COA1	0.17	PGAM2	0.17	LINC00957	0.17	POLD2	0.09	MIR6838	0.05	UBE2D4	0.02	MRPS24	0	POLR2J4	0
Breast_SE_2344	MYL7	0.32	URGCP	0.3	MRPS24	0.29	URGCP-MRPS24	0.29	RASA4CP	0.27	GCK	0.25	POLD2	0.23	LINC00957	0.19	DBNL	0.19	MIR6837	0.17
Breast_SE_2345	CAMK2B	0.52	NUDCD3	0.28	RASA4CP	0.24	SPDYE1	0.19	POLR2J4	0.15	POLD2	0.11	URGCP	0.09	UBE2D4	0.06	MIR6838	0.04	MYL7	0.03
Breast_SE_2346	MIR6838	0.37	POLM	0.18	DBNL	0.12	OGDH	0.1	LINC00957	0.06	ZMIZ2	0	RASA4CP	0	MIR6837	0	CAMK2B	0	NUDCD3	-0.1
Breast_SE_2347	ZMIZ2	0.54	NPC1L1	0.34	NUDCD3	0.33	OGDH	0.28	MYO1G	0.27	SNORA9	0.24	H2AFV	0.2	CCM2	0.16	CAMK2B	0.15	GCK	0.1
Breast_SE_2348	ZMIZ2	0.6	H2AFV	0.5	NUDCD3	0.45	PURB	0.42	NPC1L1	0.41	SNHG15	0.38	PPIA	0.33	OGDH	0.32	MIR4657	0.3	TMED4	0.23
Breast_SE_2349	NPC1L1	0.47	NUDCD3	0.45	ZMIZ2	0.39	MYO1G	0.37	CCM2	0.3	SNORA5C	0.29	TBRG4	0.28	OGDH	0.25	NACAD	0.24	SNHG15	0.24
Breast_SE_2350	ZMIZ2	0.29	NPC1L1	0.28	OGDH	0.17	CCM2	0.16	RAMP3	0.15	SNORA5C	0.13	H2AFV	0.13	TMED4	0.11	NACAD	0.08	ADCY1	0.07
Breast_SE_2351	IGFBP1	0.75	SNORA5B	0.14	SNORA9	0.14	IGFBP3	0.1	SNHG15	0.07	MIR4657	0.05	PURB	0.03	SEPT7P2	0.02	ZMIZ2	0	CCM2	0
Breast_SE_2352	TNS3	0.44	C7orf65	0.44	SNORA5C	0.35	SNORA5A	0.33	IGFBP3	0.33	SUN3	0.33	LINC01447	0.29	UPP1	0.25	LINC00525	0.15	SNORA5B	0.15
Breast_SE_2353	TNS3	0.8	C7orf65	0.47	SUN3	0.33	HUS1	0.32	LINC01447	0.29	LINC00525	0.28	UPP1	0.25	C7orf69	0.18	SNORA5C	0.17	IGFBP3	0.17
Breast_SE_2354	UPP1	0.79	C7orf57	0.54	LINC00525	0.46	TNS3	0.43	SUN3	0.38	IGFBP3	0.36	C7orf65	0.28	IGFBP1	0.27	CDC14C	0.26	C7orf69	0.2
Breast_SE_2358	COBL	0.93	DDC-AS1	0.54	VSTM2A-OT1	0.48	VSTM2A	0.44	LINC01445	0.44	DDC	0.41	FIGNL1	0.3	HPVC1	0.28	ZPBP	0.21	ABCA13	0.1
Breast_SE_2360	ELDR	0.65	SUMF2	0.61	EGFR-AS1	0.55	SEC61G	0.54	PHKG1	0.52	VOPP1	0.51	EGFR	0.5	CCT6A	0.46	LOC100996654	0.45	MRPS17	0.45
Breast_SE_2361	EGFR	0.76	EGFR-AS1	0.69	VOPP1	0.65	PSPH	0.6	SUMF2	0.59	CCT6A	0.58	PHKG1	0.57	ELDR	0.52	CHCHD2	0.41	MRPS17	0.39
Breast_SE_2363	ZNF713	0.77	LANCL2	0.63	SNORA15	0.62	ELDR	0.57	PSPH	0.56	MRPS17	0.45	PHKG1	0.4	LOC100996654	0.39	CHCHD2	0.39	SUMF2	0.38
Breast_SE_2364	ZNF713	0.77	LANCL2	0.63	SNORA15	0.62	ELDR	0.58	PSPH	0.56	MRPS17	0.45	PHKG1	0.4	LOC100996654	0.39	SUMF2	0.39	CHCHD2	0.39
Breast_SE_2365	ZNF713	0.77	LANCL2	0.63	SNORA15	0.62	ELDR	0.58	PSPH	0.56	MRPS17	0.45	PHKG1	0.4	LOC100996654	0.39	SUMF2	0.39	CHCHD2	0.39
Breast_SE_2366	ZNF713	0.77	LANCL2	0.63	SNORA15	0.62	ELDR	0.57	PSPH	0.56	MRPS17	0.45	PHKG1	0.4	LOC100996654	0.39	CHCHD2	0.39	SUMF2	0.38
Breast_SE_2367	ZNF713	0.77	LANCL2	0.63	SNORA15	0.62	ELDR	0.57	PSPH	0.56	MRPS17	0.45	PHKG1	0.4	SUMF2	0.38	CHCHD2	0.38	LOC100996654	0.38
Breast_SE_2368	ZNF713	0.77	LANCL2	0.63	SNORA15	0.62	ELDR	0.57	PSPH	0.56	MRPS17	0.45	PHKG1	0.4	SUMF2	0.38	CHCHD2	0.38	LOC100996654	0.38
Breast_SE_2369	VOPP1	0.77	ELDR	0.54	PSPH	0.54	EGFR	0.51	CHCHD2	0.5	LANCL2	0.5	PHKG1	0.5	EGFR-AS1	0.49	SNORA15	0.45	SUMF2	0.44
Breast_SE_2372	ZNF713	0.65	PSPH	0.56	SUMF2	0.56	PHKG1	0.55	ELDR	0.5	SNORA15	0.49	LANCL2	0.48	CHCHD2	0.4	MRPS17	0.39	VOPP1	0.29
Breast_SE_2373	ZNF736	0.76	ZNF107	0.76	ZNF680	0.67	ZNF138	0.63	MIR6839	0.6	ZNF273	0.59	CCT6P3	0.57	ERV3-1	0.55	ZNF92	0.53	LOC441242	0.43
Breast_SE_2374	LOC441242	0.5	LINC00174	0.46	GUSB	0.32	LOC644794	0.27	CRCP	0.26	SNORA22	0.25	VKORC1L1	0.21	CCT6P1	0.19	GTF2IRD1P1	0.18	ZNF92	0.16
Breast_SE_2375	TPST1	0.69	VKORC1L1	0.44	GUSB	0.41	LOC441242	0.36	ASL	0.32	SNORA22	0.3	LINC00174	0.24	TMEM248	0.16	GTF2IRD1P1	0.15	RABGEF1	0.15
Breast_SE_2376	TPST1	0.56	SNORA22	0.46	CCT6P1	0.38	TMEM248	0.38	LOC441242	0.33	ASL	0.3	TYW1	0.29	LINC00174	0.27	GUSB	0.16	GTF2IRD1P1	0.15
Breast_SE_2377	RABGEF1	0.4	PMS2P4	0.4	GTF2IRD1P1	0.39	STAG3L4	0.34	TMEM248	0.32	SNORA22	0.31	GUSB	0.3	VKORC1L1	0.3	LINC00174	0.28	CRCP	0.27
Breast_SE_2378	RABGEF1	0.58	TMEM248	0.51	GTF2IRD1P1	0.47	PMS2P4	0.43	STAG3L4	0.42	LOC644794	0.3	CRCP	0.29	LINC00174	0.27	GUSB	0.26	SNORA22	0.26
Breast_SE_2380	STAG3L4	0.27	AUTS2	0.16	LOC100507468	0.13	GTF2IRD1P1	0.13	KCTD7	0.09	RABGEF1	0.04	MIR4650-1	0	TMEM248	0	TPST1	0	MIR4650-2	0
Breast_SE_2381	AUTS2	0.93	TRIM74	0.57	LOC100101148	0.53	GTF2IP1	0.49	TRIM73	0.48	LOC541473	0.45	STAG3L3	0.45	LOC100507468	0.44	POM121	0.43	SPDYE8P	0.36
Breast_SE_2382	CALN1	0.99	STAG3L3	0.27	AUTS2	0.24	SPDYE7P	0.06	NSUN5	0.01	MIR3914-1	0	MIR3914-2	0	TRIM74	0	LOC100101148	0	POM121	0
Breast_SE_2383	BAZ1B	0.65	BCL7B	0.54	ELN	0.41	GTF2IP1	0.37	MLXIPL	0.35	SPDYE8P	0.34	FKBP6	0.32	TRIM50	0.32	ABHD11	0.3	FZD9	0.28
Breast_SE_2384	BAZ1B	0.62	CLDN4	0.6	CLDN3	0.57	MLXIPL	0.56	ABHD11	0.54	FKBP6	0.45	VPS37D	0.39	ELN	0.26	TRIM50	0.18	DNAJC30	0.18
Breast_SE_2385	LIMK1	0.67	CLIP2	0.61	BCL7B	0.5	ELN	0.4	GTF2IRD1	0.36	STX1A	0.31	TBL2	0.3	EIF4H	0.25	ABHD11-AS1	0.24	LAT2	0.2
Breast_SE_2386	CLIP2	0.7	LIMK1	0.49	STX1A	0.45	MIR4284	0.38	LAT2	0.36	GTF2IRD1	0.31	ELN	0.24	EIF4H	0.22	RFC2	0.17	LOC101926943	0.14
Breast_SE_2387	LOC101926943	0.66	GTF2I	0.63	GTF2IRD1	0.55	GTF2IRD2B	0.53	CLDN4	0.48	CLDN3	0.46	GTF2IRD2	0.44	ELN	0.42	RFC2	0.35	STAG3L2	0.28
Breast_SE_2388	HIP1	0.79	MDH2	0.54	TMEM120A	0.27	MIR4651	0.22	SRRM3	0.21	SNORA14A	0.19	STYXL1	0.18	NCF1C	0.18	RHBDD2	0.16	HSPB1	0.16
Breast_SE_2389	MIR4651	0.54	POR	0.54	RHBDD2	0.5	SPDYE5	0.46	SNORA14A	0.46	SSC4D	0.46	ZP3	0.42	PMS2P3	0.41	MDH2	0.39	HSPB1	0.38
Breast_SE_2390	PMS2P3	0.63	STYXL1	0.6	MDH2	0.59	RHBDD2	0.51	TMEM120A	0.42	HIP1	0.39	LOC100133091	0.36	POR	0.34	CCL24	0.33	ZP3	0.28
Breast_SE_2391	HSPB1	0.76	RHBDD2	0.6	MDH2	0.6	POR	0.47	TMEM120A	0.46	CCL26	0.36	SNORA14A	0.33	ZP3	0.31	YWHAG	0.31	POMZP3	0.3
Breast_SE_2392	DTX2	0.42	UPK3B	0.38	MIR4651	0.37	CCL24	0.36	DTX2P1-UPK3BP1-PMS2P11	0.32	SNORA14A	0.17	FDPSP2	0.1	POR	0.07	STYXL1	0.03	PMS2P9	0.03
Breast_SE_2393	DTX2	0.42	DTX2P1-UPK3BP1-PMS2P11	0.33	PTPN12	0.32	UPK3B	0.31	FGL2	0.18	APTR	0.17	LOC101927243	0.17	RSBN1L	0.14	PMS2P9	0.11	LOC100133091	0.09
Breast_SE_2395	GSAP	0.82	LOC100133091	0.44	POMZP3	0.41	LOC101927243	0.3	PTPN12	0.28	DTX2P1-UPK3BP1-PMS2P11	0.27	APTR	0.2	RSBN1L	0.14	DTX2	0.11	RPL13AP17	0.09
Breast_SE_2396	PTPN12	0.72	TMEM60	0.66	RSBN1L	0.64	APTR	0.62	POMZP3	0.62	LOC100133091	0.6	GSAP	0.42	PHTF2	0.25	MAGI2	0.23	SSC4D	0.21
Breast_SE_2397	ZP3	0.64	SSC4D	0.61	RSBN1L	0.46	POMZP3	0.45	TMEM60	0.38	APTR	0.3	LOC100133091	0.3	GSAP	0.21	PHTF2	0.21	PMS2P9	0.18
Breast_SE_2400	SEMA3C	0.55	CACNA2D1	0.37	TMEM60	0.3	PCLO	0.19	PHTF2	0.18	CD36	0.16	GNAI1	0.11	HGF	0.08	LOC100128317	0.07	LOC101927356	0.05
Breast_SE_2405	STEAP4	0.73	LOC102723885	0.6	SRI	0.49	TMEM243	0.41	STEAP2-AS1	0.22	SLC25A40	0.18	ADAM22	0.09	STEAP1	0.04	DMTF1	0.04	ABCB1	0.02
Breast_SE_2407	CDK14	0.77	STEAP1	0.59	GTPBP10	0.59	CLDN12	0.58	STEAP2	0.4	KRIT1	0.38	MTERF1	0.37	CFAP69	0.35	CYP51A1	0.24	ANKIB1	0.22
Breast_SE_2408	FZD1	0.82	AKAP9	0.51	KRIT1	0.5	ERVW-1	0.5	GATAD1	0.46	MIR1285-1	0.41	ANKIB1	0.4	GTPBP10	0.3	CFAP69	0.3	CDK14	0.28
Breast_SE_2410	CDK6	0.85	LOC101927497	0.62	SAMD9L	0.49	SAMD9	0.38	MTERF1	0.2	LRRD1	0.2	CYP51A1	0.13	ERVW-1	0.12	MIR1285-1	0.05	CYP51A1-AS1	0.01
Breast_SE_2412	COL1A2	0.75	GNG11	0.74	BET1	0.6	PON2	0.6	SGCE	0.47	PDK4	0.43	CASD1	0.34	SAMD9L	0.32	TFPI2	0.22	PEG10	0.2
Breast_SE_2413	CASD1	0.77	PPP1R9A	0.54	HEPACAM2	0.47	PON2	0.37	PEG10	0.37	BET1	0.33	ASB4	0.23	PON1	0.21	PDK4	0.05	PON3	0.03
Breast_SE_2420	MIR5692A1	0.46	PPP1R9A	0.37	SLC25A13	0.3	ASB4	0.27	PON1	0.27	DLX6-AS1	0.19	PEG10	0.18	DLX5	0.18	DLX6	0.1	PON2	0.1
Breast_SE_2421	DLX6	0.86	DLX6-AS1	0.79	DLX5	0.71	DYNC1I1	0.69	BHLHA15	0.34	PON2	0.23	PDK4	0.21	ASNS	0.17	BRI3	0.08	SLC25A13	0.04
Breast_SE_2422	BRI3	0.69	TECPR1	0.4	MIR5692A1	0.36	TAC1	0.28	BHLHA15	0.25	LMTK2	0.22	TRRAP	0.21	ARPC1A	0.19	MYH16	0.19	BAIAP2L1	0.16
Breast_SE_2423	TECPR1	0.34	BRI3	0.23	ARPC1A	0.23	NPTX2	0.18	BAIAP2L1	0.16	KPNA7	0.15	BHLHA15	0.14	TAC1	0.12	TMEM130	0.09	OCM2	0
Breast_SE_2424	PDAP1	0.66	CPSF4	0.66	ATP5J2-PTCD1	0.61	TRRAP	0.59	ATP5J2	0.55	TMEM130	0.52	PTCD1	0.49	BUD31	0.48	ARPC1A	0.4	MIR3609	0.38
Breast_SE_2425	LOC101927550	0.68	SMURF1	0.61	ZNF394	0.54	CPSF4	0.52	ARPC1B	0.46	FAM200A	0.45	MIR3609	0.42	ZNF655	0.36	TRRAP	0.32	ARPC1A	0.32
Breast_SE_2426	SMURF1	0.45	MYH16	0.41	KPNA7	0.37	LOC101927550	0.37	ARPC1B	0.28	TMEM130	0.18	MIR3609	0.16	PDAP1	0.14	ZNF789	0.1	TRRAP	0.1
Breast_SE_2427	ATP5J2	0.52	ATP5J2-PTCD1	0.52	PDAP1	0.49	ZNF394	0.48	CPSF4	0.45	PTCD1	0.36	ZKSCAN5	0.35	ARPC1A	0.33	BUD31	0.32	CYP3A7	0.27
Breast_SE_2428	ZNF655	0.94	FAM200A	0.35	ARPC1B	0.3	PDAP1	0.28	MYH16	0.23	CYP3A4	0.15	ZNF394	0.11	BUD31	0.1	CYP3A5	0.1	CYP3A43	0.09
Breast_SE_2430	AZGP1	0.71	GJC3	0.63	ZKSCAN1	0.54	AZGP1P1	0.53	TRIM4	0.51	MBLAC1	0.42	AP4M1	0.28	OR2AE1	0.27	ZNF3	0.23	ZSCAN21	0.2
Breast_SE_2431	ZSCAN21	0.7	AP4M1	0.63	LAMTOR4	0.62	TAF6	0.6	ZNF3	0.54	MBLAC1	0.54	MCM7	0.51	ZKSCAN1	0.51	GPC2	0.49	STAG3	0.41
Breast_SE_2433	SPDYE3	0.72	TSC22D4	0.59	PPP1R35	0.51	FBXO24	0.47	C7orf61	0.46	MEPCE	0.37	PMS2P1	0.37	PCOLCE-AS1	0.34	NYAP1	0.3	ZCWPW1	0.25
Breast_SE_2434	FBXO24	0.59	MOSPD3	0.53	POP7	0.48	GNB2	0.43	ZCWPW1	0.38	C7orf61	0.33	PCOLCE	0.33	ACTL6B	0.33	PCOLCE-AS1	0.32	MEPCE	0.31
Breast_SE_2435	GNB2	0.7	POP7	0.59	MOSPD3	0.54	EPO	0.5	ZAN	0.49	ACTL6B	0.44	EPHB4	0.41	FBXO24	0.37	SLC12A9	0.35	GIGYF1	0.3
Breast_SE_2436	POP7	0.62	GNB2	0.61	MOSPD3	0.6	SLC12A9	0.56	EPHB4	0.54	UFSP1	0.53	FBXO24	0.47	MUC12	0.38	PCOLCE	0.37	PCOLCE-AS1	0.32
Breast_SE_2437	MUC3A	0.63	UFSP1	0.33	AP1S1	0.32	MIR4653	0.25	VGF	0.11	TRIP6	0.05	ZAN	0.04	EPO	0.04	SLC12A9	0	ACHE	0
Breast_SE_2438	PLOD3	0.7	LOC102724094	0.66	MUC12	0.55	SERPINE1	0.53	FIS1	0.52	TRIP6	0.5	TRIM56	0.49	MIR6875	0.45	VGF	0.45	AP1S1	0.38
Breast_SE_2439	COL26A1	0.55	MYL10	0.5	IFT22	0.42	LOC102724094	0.38	FIS1	0.37	MUC12	0.36	MIR4653	0.32	ZNHIT1	0.32	LINC01007	0.29	PLOD3	0.28
Breast_SE_2440	FIS1	0.5	CUX1	0.47	NAT16	0.42	MYL10	0.41	AP1S1	0.33	ZNHIT1	0.3	IFT22	0.28	VGF	0.27	LINC01007	0.24	LOC101927746	0.19
Breast_SE_2441	CUX1	0.53	ORAI2	0.48	LOC101927746	0.38	FIS1	0.38	PLOD3	0.34	IFT22	0.32	MIR548O	0.22	ZNHIT1	0.17	LINC01007	0.15	SPDYE6	0.12
Breast_SE_2442	SH2B2	0.69	POLR2J	0.58	MIR4285	0.55	RASA4B	0.52	RASA4	0.49	ALKBH4	0.49	POLR2J3	0.46	MIR548O	0.44	PRKRIP1	0.44	LOC100630923	0.42
Breast_SE_2443	ORAI2	0.67	POLR2J	0.64	SH2B2	0.53	ALKBH4	0.48	PRKRIP1	0.44	LOC100630923	0.44	RASA4	0.38	RASA4B	0.38	FAM185A	0.34	LOC100289561	0.33
Breast_SE_2446	KMT2E-AS1	0.56	ATXN7L1	0.55	KMT2E	0.53	SRPK2	0.49	PUS7	0.32	LINC01004	0.31	LHFPL3-AS2	0.29	CDHR3	0.27	RINT1	0.26	DNAJC2	0.25
Breast_SE_2447	EFCAB10	0.59	SRPK2	0.58	RINT1	0.52	LINC01004	0.44	PUS7	0.42	ATXN7L1	0.37	ORC5	0.35	KMT2E	0.28	LOC101927870	0.24	LHFPL3	0.22
Breast_SE_2448	SYPL1	0.41	LINC01004	0.34	HBP1	0.3	PRKAR2B	0.27	KMT2E-AS1	0.21	KMT2E	0.15	LHFPL3-AS1	0.06	RINT1	0.02	GPR22	0.01	NAMPT	0
Breast_SE_2449	NAMPT	0.68	ATXN7L1	0.43	KMT2E	0.42	HBP1	0.38	SRPK2	0.35	CDHR3	0.27	PUS7	0.27	RINT1	0.23	EFCAB10	0.2	SYPL1	0.2
Breast_SE_2450	NAMPT	0.56	SYPL1	0.21	CCDC71L	0.19	PRKAR2B	0.16	HBP1	0.13	SLC26A4	0.12	ATXN7L1	0.11	PUS7	0.04	RINT1	0.04	PIK3CG	0.01
Breast_SE_2451	CCDC71L	0.43	NAMPT	0.31	PRKAR2B	0.16	SLC26A4	0.14	HBP1	0.12	SLC26A4-AS1	0.09	PUS7	0.09	CDHR3	0.07	RINT1	0.06	CBLL1	0.06
Breast_SE_2452	BCAP29	0.34	CCDC71L	0.27	SLC26A4	0.26	LOC101927974	0.24	SLC26A4-AS1	0.24	NAMPT	0.16	SYPL1	0.12	CDHR3	0.02	PRKAR2B	0	COG5	0
Breast_SE_2456	LAMB1	0.74	SLC26A4	0.4	LAMB4	0.35	C7orf66	0.28	SLC26A4-AS1	0.14	DUS4L	0.12	THAP5	0.04	PIK3CG	0.03	PNPLA8	0.02	LOC101927974	0
Breast_SE_2458	NRCAM	0.57	LOC101927974	0.26	GPR22	0.19	DUS4L	0.18	PRKAR2B	0.16	DLD	0	HBP1	0	THAP5	0	SLC26A4-AS1	0	PNPLA8	0
Breast_SE_2461	CAV1	0.5	CAV2	0.5	MDFIC	0.45	LOC102724434	0.36	LINC01393	0.35	MET	0.28	ST7-AS1	0.26	ST7-AS2	0.24	ST7-OT4	0.2	ST7-OT3	0.2
Breast_SE_2462	CAV2	0.92	CAV1	0.91	MET	0.75	MDFIC	0.6	LINC01393	0.44	LINC01510	0.37	LOC102724434	0.32	MIR6132	0.28	WNT2	0.24	ST7-AS2	0.06
Breast_SE_2463	CAV2	0.82	MET	0.81	CAV1	0.8	LINC01510	0.32	MIR6132	0.2	ANKRD7	0.18	ST7	0.11	WNT2	0.05	ST7-AS2	0.01	TFEC	0
Breast_SE_2464	CTTNBP2	0.54	WNT2	0.45	TES	0.22	CFTR	0.16	LSM8	0.14	ASZ1	0.14	LOC102724434	0.04	ST7-AS1	0	TFEC	0	ST7-OT3	0
Breast_SE_2468	FEZF1	0.57	FEZF1-AS1	0.54	FAM3C	0.42	LOC102724555	0.18	ASB15	0.18	LMOD2	0.12	TSPAN12	0.04	CPED1	0.03	TAS2R16	0	NDUFA5	0
Breast_SE_2471	HILPDA	0.73	PRRT4	0.66	IMPDH1	0.38	ATP6V1F	0.37	LEP	0.37	LRRC4	0.27	METTL2B	0.24	CCDC136	0.16	LOC100130705	0.12	LINC01000	0.09
Breast_SE_2472	FLNC	0.66	ATP6V1F	0.42	KCP	0.38	CCDC136	0.37	OPN1SW	0.29	SMO	0.29	CALU	0.25	LOC100130705	0.19	FAM71F1	0.14	METTL2B	0
Breast_SE_2473	STRIP2	0.8	CCDC136	0.23	FLNC	0.19	UBE2H	0.18	SMKR1	0.09	TNPO3	0.08	LOC407835	0.06	ZC3HC1	0.05	MIR182	0.01	AHCYL2	0
Breast_SE_2474	NRF1	0.47	TSPAN33	0.32	KLHDC10	0.31	MIR182	0.22	CPA5	0.22	SMKR1	0.2	CPA1	0.14	MIR183	0.12	AHCYL2	0.1	TMEM209	0.07
Breast_SE_2475	UBE2H	0.62	CEP41	0.51	ZC3HC1	0.44	CPA4	0.23	MIR183	0.19	MIR182	0.17	MEST	0.15	KLHDC10	0.13	SMKR1	0.12	SSMEM1	0.11
Breast_SE_2476	UBE2H	0.46	SMKR1	0.41	STRIP2	0.41	MIR182	0.33	MIR183	0.26	KLHDC10	0.15	CEP41	0.12	MESTIT1	0.11	CPA5	0.05	TMEM209	0.04
Breast_SE_2477	CPA4	0.46	CPA5	0.44	MESTIT1	0.31	CPA1	0.29	CEP41	0.28	COPG2	0.27	MIR182	0.26	KLHDC10	0.25	MIR183	0.22	CPA2	0.18
Breast_SE_2478	MEST	0.65	MESTIT1	0.64	COPG2	0.53	COPG2IT1	0.5	SSMEM1	0.46	TSGA13	0.4	KLHDC10	0.38	CPA1	0.34	TMEM209	0.29	CPA5	0.29
Breast_SE_2479	LINC-PINT	0.45	CEP41	0.36	MKLN1-AS	0.35	SSMEM1	0.15	CPA4	0.14	MIR29A	0.11	TMEM209	0.02	MIR335	0	CPA5	0	KLF14	0
Breast_SE_2480	CEP41	0.65	LINC-PINT	0.63	MKLN1-AS	0.47	MKLN1	0.4	MESTIT1	0.27	MIR29A	0.27	CPA4	0.23	LOC101928782	0.22	SSMEM1	0.09	PODXL	0.08
Breast_SE_2481	PODXL	0.84	LOC101928782	0.3	CPA1	0.27	COPG2IT1	0.26	TSGA13	0.23	MIR29B1	0.22	CPA5	0.21	MIR29A	0.11	LINC-PINT	0.02	MIR335	0
Breast_SE_2482	PODXL	0.49	PLXNA4	0.37	CEP41	0.32	LOC100506937	0.3	MIR29A	0.28	LINC-PINT	0.2	TSGA13	0.15	CHCHD3	0.12	MKLN1-AS	0.12	LOC101928782	0.09
Breast_SE_2483	AKR1B1	0.82	SLC35B4	0.45	CALD1	0.41	AKR1B10	0.4	AKR1B15	0.33	TMEM140	0.32	EXOC4	0.32	SLC13A4	0.29	NUP205	0.23	FAM180A	0.2
Breast_SE_2484	AKR1B15	0.71	AKR1B10	0.68	STRA8	0.44	C7orf49	0.36	WDR91	0.34	CNOT4	0.25	AKR1B1	0.2	EXOC4	0.19	AGBL3	0.16	NUP205	0.13
Breast_SE_2485	CALD1	0.63	WDR91	0.31	AGBL3	0.3	MIR6509	0.29	BPGM	0.28	SLC13A4	0.27	AKR1B15	0.23	C7orf49	0.22	AKR1B10	0.22	CNOT4	0.21
Breast_SE_2486	WDR91	0.72	C7orf49	0.45	TMEM140	0.45	LOC101928861	0.43	AGBL3	0.42	AKR1B15	0.38	MIR6509	0.37	AKR1B10	0.36	SLC13A4	0.35	STRA8	0.34
Breast_SE_2487	CREB3L2	0.58	DGKI	0.43	PTN	0.36	LOC100130880	0.33	ZC3HAV1L	0.26	MIR4468	0.17	AKR1D1	0.17	KIAA1549	0.13	CHRM2	0.12	UBN2	0.08
Breast_SE_2490	KIAA1549	0.52	C7orf55-LUC7L2	0.52	UBN2	0.49	TRIM24	0.41	LUC7L2	0.39	AKR1D1	0.29	ZC3HAV1	0.27	LOC100129148	0.25	TBXAS1	0.11	SVOPL	0.1
Breast_SE_2492	C7orf55-LUC7L2	0.59	TRIM24	0.53	LUC7L2	0.48	LOC100129148	0.45	UBN2	0.4	JHDM1D-AS1	0.31	KDM7A	0.24	KIAA1549	0.21	TBXAS1	0.14	HIPK2	0.08
Breast_SE_2493	C7orf55-LUC7L2	0.64	TRIM24	0.56	LUC7L2	0.54	LOC100129148	0.51	UBN2	0.4	JHDM1D-AS1	0.32	KDM7A	0.26	KIAA1549	0.18	TBXAS1	0.13	HIPK2	0.11
Breast_SE_2494	C7orf55-LUC7L2	0.64	TRIM24	0.55	LUC7L2	0.54	LOC100129148	0.5	UBN2	0.39	JHDM1D-AS1	0.31	KDM7A	0.26	KIAA1549	0.18	TBXAS1	0.14	HIPK2	0.11
Breast_SE_2495	JHDM1D-AS1	0.72	KDM7A	0.68	KLRG2	0.68	UBN2	0.66	RAB19	0.6	LOC100129148	0.47	LUC7L2	0.44	SVOPL	0.38	KIAA1549	0.35	C7orf55-LUC7L2	0.35
Breast_SE_2496	HIPK2	0.79	TBXAS1	0.79	SLC37A3	0.36	PARP12	0.35	DENND2A	0.23	ZC3HAV1	0.18	LUC7L2	0.12	C7orf55-LUC7L2	0.1	TTC26	0.07	LOC100129148	0.04
Breast_SE_2502	JHDM1D-AS1	0.7	KDM7A	0.6	RAB19	0.51	KLRG2	0.45	MKRN1	0.39	TMEM178B	0.17	LUC7L2	0.1	NDUFB2	0.08	ADCK2	0.07	LOC100129148	0.06
Breast_SE_2503	JHDM1D-AS1	0.7	KDM7A	0.59	RAB19	0.56	MKRN1	0.36	KLRG2	0.3	LUC7L2	0.11	ADCK2	0.07	C7orf55-LUC7L2	0.04	NDUFB2-AS1	0.04	LOC100129148	0.03
Breast_SE_2504	NDUFB2	0.76	MRPS33	0.67	NDUFB2-AS1	0.67	C7orf55-LUC7L2	0.5	MKRN1	0.45	BRAF	0.28	DENND2A	0.26	AGK	0.26	LOC100129148	0.23	TMEM178B	0.23
Breast_SE_2505	DENND2A	0.81	TBXAS1	0.43	AGK	0.33	PARP12	0.33	NDUFB2	0.31	HIPK2	0.23	SLC37A3	0.21	NDUFB2-AS1	0.2	MRPS33	0.15	TMEM178B	0
Breast_SE_2507	MGAM	0.44	PRSS58	0.41	OR9A2	0.37	MOXD2P	0.35	PRSS2	0.26	TAS2R38	0.23	PRSS37	0.07	TAS2R3	0.06	TAS2R5	0.05	TRY2P	0
Breast_SE_2508	PRSS58	0.56	EPHB6	0.31	OR9A2	0.28	PRSS1	0.25	MOXD2P	0.19	GSTK1	0.18	TMEM139	0.13	PIP	0.02	CLCN1	0	TAS2R39	0
Breast_SE_2509	TRPV6	0.79	EPHB6	0.76	TRPV5	0.67	KEL	0.5	CASP2	0.5	PIP	0.49	TAS2R40	0.39	PRSS1	0.36	TMEM139	0.35	GSTK1	0.34
Breast_SE_2510	TRPV6	0.92	PIP	0.76	EPHB6	0.6	TRPV5	0.59	TMEM139	0.58	TAS2R40	0.58	EPHA1	0.53	CASP2	0.41	OR6W1P	0.4	GSTK1	0.33
Breast_SE_2511	GSTK1	0.63	FAM131B	0.5	ZYX	0.5	TMEM139	0.47	LOC100507507	0.41	CASP2	0.37	PIP	0.31	TAS2R40	0.13	CLCN1	0.09	OR6V1	0.01
Breast_SE_2512	CUL1	0.63	ZNF212	0.6	ZNF786	0.53	ZNF746	0.48	EZH2	0.47	ZNF777	0.43	RNY4	0.42	RNY5	0.39	ZNF398	0.37	RNY1	0.35
Breast_SE_2513	ZNF212	0.75	EZH2	0.71	ZNF786	0.71	CUL1	0.67	ZNF777	0.67	ZNF746	0.65	ZNF425	0.53	ZNF282	0.53	RNY4	0.44	RNY1	0.35
Breast_SE_2514	ZNF212	0.75	EZH2	0.71	ZNF786	0.71	CUL1	0.68	ZNF777	0.67	ZNF746	0.65	ZNF425	0.53	ZNF282	0.53	RNY4	0.44	RNY1	0.35
Breast_SE_2515	ZNF212	0.75	EZH2	0.71	ZNF786	0.71	CUL1	0.68	ZNF777	0.67	ZNF746	0.65	ZNF425	0.53	ZNF282	0.53	RNY4	0.44	RNY1	0.36
Breast_SE_2516	ZNF212	0.84	ZNF786	0.79	EZH2	0.75	ZNF425	0.7	ZNF398	0.7	CUL1	0.62	ZNF746	0.6	ZNF777	0.58	ZNF282	0.45	LOC155060	0.45
Breast_SE_2517	ZNF212	0.75	ZNF777	0.72	CUL1	0.69	ZNF398	0.69	ZNF746	0.67	ZNF786	0.66	EZH2	0.61	ZNF425	0.61	ZNF282	0.59	ZNF783	0.56
Breast_SE_2518	ZNF467	0.67	ZNF398	0.67	ZNF425	0.62	ZNF862	0.59	ZNF786	0.57	SSPO	0.52	ATP6V0E2	0.47	ZNF746	0.46	KRBA1	0.42	ZNF212	0.4
Breast_SE_2519	ATP6V0E2	0.8	ZNF467	0.75	REPIN1	0.74	ZNF862	0.73	LOC728743	0.6	ATP6V0E2-AS1	0.54	ACTR3C	0.51	LRRC61	0.51	SSPO	0.5	ZBED6CL	0.49
Breast_SE_2520	REPIN1	0.92	LOC728743	0.57	ZBED6CL	0.55	ZNF862	0.55	ACTR3C	0.53	LRRC61	0.53	ATP6V0E2	0.48	ATP6V0E2-AS1	0.43	ZNF775	0.17	RARRES2	0.13
Breast_SE_2521	SLC4A2	0.8	ABCF2	0.7	AGAP3	0.65	CDK5	0.65	ABCB8	0.61	FASTK	0.5	NOS3	0.3	ASB10	0.27	ATG9B	0.22	KCNH2	0.21
Breast_SE_2522	SMARCD3	0.85	ABCF2	0.62	NUB1	0.6	CHPF2	0.56	RHEB	0.53	CDK5	0.53	SLC4A2	0.52	AGAP3	0.47	MIR671	0.46	TMUB1	0.41
Breast_SE_2523	PRKAG2	0.79	RHEB	0.45	SLC4A2	0.42	CHPF2	0.35	CRYGN	0.33	FASTK	0.3	WDR86	0.3	WDR86-AS1	0.28	MIR3907	0.27	ASB10	0.25
Breast_SE_2524	LINC01003	0.62	ACTR3B	0.61	KMT2C	0.49	PRKAG2-AS1	0.35	FABP5P3	0.35	GALNT11	0.33	SMARCD3	0.21	RHEB	0.17	NUB1	0.13	GALNTL5	0.12
Breast_SE_2525	LINC01003	0.61	ACTR3B	0.61	KMT2C	0.48	FABP5P3	0.36	PRKAG2-AS1	0.33	GALNT11	0.32	SMARCD3	0.24	RHEB	0.16	NUB1	0.12	GALNTL5	0.11
Breast_SE_2527	HTR5A	0.33	LOC100506302	0.29	LOC389602	0.28	C7orf13	0.2	PAXIP1-AS1	0.2	RNF32	0.11	LMBR1	0.07	INSIG1	0.06	CNPY1	0.04	SHH	0.03
Breast_SE_2528	LOC389602	0.62	LOC100506302	0.59	RNF32	0.51	LMBR1	0.36	INSIG1	0.35	HTR5A	0.24	RBM33	0.21	SHH	0.15	C7orf13	0.12	DPP6	0.11
Breast_SE_2529	PAXIP1	0.72	RNF32	0.67	NOM1	0.56	RBM33	0.49	LOC389602	0.43	LINC00244	0.39	LINC01006	0.39	LMBR1	0.39	LOC100506302	0.38	EN2	0.37
Breast_SE_2531	LOC389602	0.58	LOC100506302	0.48	NOM1	0.45	RNF32	0.27	RBM33	0.23	PAXIP1	0.17	C7orf13	0.08	INSIG1	0.07	PAXIP1-AS1	0.07	LMBR1	0.03
Breast_SE_2532	C7orf13	0.75	RNF32	0.72	LINC01006	0.61	LOC285889	0.45	LOC101927914	0.44	DNAJB6	0.42	LMBR1	0.38	CNPY1	0.37	SHH	0.37	LINC00244	0.33
Breast_SE_2533	MNX1	0.88	MNX1-AS1	0.77	LINC00244	0.38	CNPY1	0.32	LOC285889	0.31	MIR153-2	0.3	SHH	0.24	PTPRN2	0.2	LINC01006	0.16	RBM33	0.14
Breast_SE_2534	NOM1	0.61	LOC389602	0.58	DNAJB6	0.5	NCAPG2	0.49	RNF32	0.45	UBE3C	0.39	SHH	0.22	LOC101927914	0.15	LOC285889	0.12	C7orf13	0.03
Breast_SE_2535	NCAPG2	0.7	NOM1	0.64	RNF32	0.61	WDR60	0.59	DNAJB6	0.51	UBE3C	0.44	C7orf13	0.38	LMBR1	0.36	LINC00244	0.3	ESYT2	0.29
Breast_SE_2536	ESYT2	0.76	DNAJB6	0.68	NCAPG2	0.62	UBE3C	0.6	NOM1	0.53	RNF32	0.5	WDR60	0.48	C7orf13	0.46	LMBR1	0.43	LOC101927914	0.34
Breast_SE_2537	LINC00689	0.6	RNF32	0.4	C7orf13	0.38	NCAPG2	0.28	VIPR2	0.19	LOC101927914	0.13	DNAJB6	0.11	LINC00244	0.11	LMBR1	0.07	MIR595	0
Breast_SE_2538	ARHGEF10	0.74	ERICH1	0.66	CLN8	0.62	LOC101927752	0.61	FBXO25	0.47	TDRP	0.42	ZNF596	0.39	MIR3674	0.37	KBTBD11	0.33	MYOM2	0.26
Breast_SE_2539	XKR5	0.32	DEFA4	0.32	AGPAT5	0.28	DEFA6	0.28	DEFA10P	0.28	GS1-24F4.2	0.25	MIR8055	0.21	MCPH1	0.21	ANGPT2	0.18	LOC100287015	0.17
Breast_SE_2540	DEFB1	0.56	GS1-24F4.2	0.52	XKR5	0.43	DEFA6	0.29	MIR8055	0.03	DEFA8P	0	DEFA9P	0	DEFA1	0	DEFA1B	0	DEFT1P	0
Breast_SE_2541	FAM86B3P	0.3	MFHAS1	0.25	FAM66E	0.16	MIR548I3	0	USP17L3	0	USP17L8	0	ZNF705B	0	DEFB4A	0	SPAG11A	0	FAM90A10P	0
Breast_SE_2542	ERI1	0.33	LOC157273	0.32	FAM86B3P	0.29	MFHAS1	0.27	LOC101929128	0.2	FAM66E	0.15	CLDN23	0.14	MIR548I3	0	USP17L3	0	USP17L8	0
Breast_SE_2543	MFHAS1	0.56	ERI1	0.53	LINC00599	0.51	PPP1R3B	0.4	MIR4660	0.29	FAM86B3P	0.28	LOC101929128	0.1	LOC157273	0.06	MIR548I3	0	USP17L3	0
Breast_SE_2546	SOX7	0.68	RP1L1	0.57	LOC102723313	0.45	XKR6	0.35	C8orf74	0.34	MIR1322	0.32	LINCR-0001	0.29	MIR598	0.25	MSRA	0.23	PINX1	0.19
Breast_SE_2547	FAM167A	0.82	BLK	0.39	XKR6	0.37	MIR1322	0.34	DEFB135	0.28	TDH	0.24	SLC35G5	0.22	MTMR9	0.18	MIR598	0.14	CTSB	0.13
Breast_SE_2549	CTSB	0.73	NEIL2	0.58	FDFT1	0.48	FAM167A	0.37	DEFB135	0.26	FAM86B2	0.25	FAM86B1	0.16	FAM85A	0.11	USP17L7	0.07	C8orf49	0.03
Breast_SE_2551	DLC1	0.88	LOC100506990	0.52	LOC729732	0.51	FAM85A	0.43	LONRF1	0.36	LOC649352	0.34	MIR3926-1	0.33	FAM86B1	0.3	FAM90A2P	0.29	KIAA1456	0.26
Breast_SE_2552	C8orf48	0.81	DLC1	0.67	LOC100506990	0.46	FAM85A	0.45	LOC649352	0.42	MIR3926-2	0.36	KIAA1456	0.34	MIR3926-1	0.22	LONRF1	0.15	MIR5692A1	0.09
Breast_SE_2554	SLC7A2	0.74	PDGFRL	0.43	NAT1	0.37	LOC101929066	0.33	MTMR7	0.3	MTUS1	0.27	PSD3	0.17	MIR548V	0.1	PCM1	0.06	MSR1	0
Breast_SE_2555	LOC100128993	0.5	PDGFRL	0.49	FGF20	0.44	MIR548V	0.37	LOC101929066	0.32	MTUS1	0.27	PSD3	0.19	CSGALNACT1	0.15	NAT1	0.14	MSR1	0.07
Breast_SE_2556	MTUS1	0.86	MIR548V	0.53	FGL1	0.49	NAT2	0.38	ASAH1	0.3	LOC101929066	0.25	LOC100128993	0.1	PSD3	0.08	SH2D4A	0.07	PDGFRL	0
Breast_SE_2558	PSD3	0.66	LZTS1-AS1	0.54	LZTS1	0.49	SLC18A1	0.43	SH2D4A	0.37	PDGFRL	0.34	SLC7A2	0.29	LOC101929066	0.28	INTS10	0.21	ATP6V1B2	0.19
Breast_SE_2560	SH2D4A	0.61	ASAH1	0.45	LOC101929066	0.4	LPL	0.37	NAT1	0.33	PSD3	0.33	MTUS1	0.3	MIR548V	0.29	NAT2	0.25	SLC18A1	0.19
Breast_SE_2562	CSGALNACT1	0.82	LOC100128993	0.38	INTS10	0.36	ASAH1	0.29	SH2D4A	0.26	ATP6V1B2	0.24	LZTS1-AS1	0.12	MIR548V	0.11	PDGFRL	0.09	FGL1	0.09
Breast_SE_2564	REEP4	0.64	PHYHIP	0.59	PPP3CC	0.56	XPO7	0.52	FAM160B2	0.51	POLR3D	0.47	HR	0.46	SLC39A14	0.43	NUDT18	0.43	DMTN	0.41
Breast_SE_2565	SLC39A14	0.75	PPP3CC	0.71	POLR3D	0.66	BMP1	0.62	PIWIL2	0.61	SORBS3	0.6	PDLIM2	0.6	C8orf58	0.58	BIN3	0.55	LOC100507071	0.47
Breast_SE_2566	PPP3CC	0.84	SORBS3	0.72	SLC39A14	0.68	LOC100507071	0.61	BMP1	0.53	C8orf58	0.51	BIN3	0.44	PDLIM2	0.44	PIWIL2	0.4	CCAR2	0.36
Breast_SE_2567	PPP3CC	0.76	BIN3	0.72	C8orf58	0.7	POLR3D	0.68	BMP1	0.67	LOC100507071	0.65	PDLIM2	0.62	SORBS3	0.57	CCAR2	0.54	PHYHIP	0.54
Breast_SE_2568	RHOBTB2	0.7	TNFRSF10B	0.3	EGR3	0.24	LOC100507156	0.2	CCAR2	0.18	LOXL2	0.17	BIN3	0.16	TNFRSF10A	0.14	TNFRSF10C	0.12	CHMP7	0.11
Breast_SE_2569	TNFRSF10B	0.72	SLC25A37	0.67	R3HCC1	0.63	BIN3	0.6	LOXL2	0.53	CHMP7	0.52	CCAR2	0.51	LOC100507156	0.46	TNFRSF10A	0.44	TNFRSF10D	0.42
Breast_SE_2570	TNFRSF10A	0.77	LOC389641	0.74	TNFRSF10B	0.2	SLC25A37	0.07	BIN3-IT1	0.05	PEBP4	0.01	LOC101929237	0	NKX3-1	0	TNFRSF10D	0	TNFRSF10C	0
Breast_SE_2571	LOXL2	0.84	LOC100507156	0.82	SLC25A37	0.62	ENTPD4	0.61	STC1	0.56	CHMP7	0.55	R3HCC1	0.54	TNFRSF10B	0.45	NKX3-1	0.41	LOC286059	0.31
Breast_SE_2572	SLC25A37	0.84	LOXL2	0.74	LOC100507156	0.7	NKX3-1	0.59	STC1	0.52	R3HCC1	0.52	CHMP7	0.49	TNFRSF10B	0.47	ENTPD4	0.42	LOC286059	0.28
Breast_SE_2575	DOCK5	0.87	DPYSL2	0.59	MIR6876	0.54	STC1	0.53	PPP2R2A	0.52	KCTD9	0.45	PNMA2	0.42	NEFL	0.38	CDCA2	0.35	MIR6841	0.31
Breast_SE_2576	ADRA1A	0.66	GNRH1	0.46	KCTD9	0.33	MIR6841	0.32	NEFL	0.3	DPYSL2	0.27	DOCK5	0.24	CDCA2	0.23	MIR6876	0.2	NEFM	0.15
Breast_SE_2577	CDCA2	0.93	KCTD9	0.75	DPYSL2	0.63	BNIP3L	0.51	GNRH1	0.41	PNMA2	0.34	DOCK5	0.26	ADRA1A	0.2	MIR6876	0.19	LOC101929315	0.15
Breast_SE_2579	PNMA2	0.43	CLU	0.43	BNIP3L	0.31	MIR6843	0.27	PPP2R2A	0.24	DPYSL2	0.22	TRIM35	0.16	EBF2	0.16	CDCA2	0.13	SCARA3	0.13
Breast_SE_2580	DPYSL2	0.9	TRIM35	0.64	PPP2R2A	0.63	KCTD9	0.62	CDCA2	0.61	SCARA3	0.6	BNIP3L	0.51	PNMA2	0.5	ADRA1A	0.19	STMN4	0
Breast_SE_2581	PBK	0.6	TRIM35	0.55	MIR6842	0.43	PTK2B	0.43	ESCO2	0.39	CCDC25	0.38	STMN4	0.37	DPYSL2	0.2	EPHX2	0.17	NUGGC	0.16
Breast_SE_2582	SCARA3	0.58	CLU	0.54	MIR6843	0.5	EPHX2	0.39	ESCO2	0.27	PNOC	0.19	ELP3	0.06	TRIM35	0.02	CCDC25	0	NUGGC	0
Breast_SE_2583	SCARA5	0.67	PBK	0.41	FBXO16	0.38	ESCO2	0.26	CCDC25	0.23	CHRNA2	0.21	EPHX2	0.2	MIR6843	0.16	ZNF395	0.16	NUGGC	0.14
Breast_SE_2584	ZNF395	0.65	ESCO2	0.47	PBK	0.41	ELP3	0.33	CCDC25	0.3	SCARA3	0.27	FBXO16	0.24	INTS9	0.17	SCARA5	0.04	FZD3	0.03
Breast_SE_2586	DUSP4	0.68	LINC00589	0.38	LOC101929470	0.28	FBXO16	0.17	MBOAT4	0.08	MIR3148	0	MIR7641-2	0	MIR4288	0	EXTL3-AS1	0	PNOC	-0.1
Breast_SE_2587	DUSP4	0.34	KIF13B	0.31	LINC00589	0.3	LOC101929470	0.21	SARAF	0.14	FZD3	0.14	RBPMS	0.13	RBPMS-AS1	0.1	FBXO16	0.06	INTS9	0
Breast_SE_2589	DCTN6	0.58	LEPROTL1	0.56	HMBOX1	0.54	UBXN8	0.49	PPP2CB	0.45	WRN	0.44	KIF13B	0.33	SARAF	0.32	GSR	0.29	SMIM18	0.26
Breast_SE_2590	RBPMS-AS1	0.83	RBPMS	0.82	GSR	0.45	KIF13B	0.16	LINC00589	0.11	SMIM18	0.08	LOC101929470	0.06	MIR3148	0	DUSP4	0	MBOAT4	0
Breast_SE_2591	RBPMS	0.75	RBPMS-AS1	0.72	KIF13B	0.15	GSR	0.14	TEX15	0.12	SMIM18	0.12	LOC101929470	0.09	LINC00589	0.08	WRN	0.07	MBOAT4	0.03
Breast_SE_2592	GSR	0.63	SMIM18	0.24	MBOAT4	0.23	RBPMS	0.21	RBPMS-AS1	0.2	GTF2E2	0.12	DCTN6	0.09	LOC101929470	0.08	UBXN8	0.08	LEPROTL1	0.07
Breast_SE_2594	NRG1	0.76	PPP2CB	0.59	MAK16	0.54	UBXN8	0.52	GTF2E2	0.42	WRN	0.38	TTI2	0.35	FUT10	0.33	DCTN6	0.3	SNORD13	0.1
Breast_SE_2596	NRG1	0.92	MAK16	0.6	PPP2CB	0.56	FUT10	0.5	UBXN8	0.49	TTI2	0.41	GTF2E2	0.35	DUSP26	0.2	RNF122	0.07	SNORD13	0.01
Breast_SE_2597	NRG1	0.76	PPP2CB	0.57	MAK16	0.5	UBXN8	0.4	GTF2E2	0.4	TTI2	0.33	FUT10	0.31	SNORD13	0.14	RNF122	0.09	PURG	0.09
Breast_SE_2602	ZNF703	0.35	LOC728024	0.27	LSM1	0.2	ERLIN2	0.19	EIF4EBP1	0.19	LOC102723701	0.19	ASH2L	0.17	DDHD2	0.16	FGFR1	0.16	C8orf86	0.15
Breast_SE_2604	ZNF703	0.67	LOC101929622	0.43	RAB11FIP1	0.41	ERLIN2	0.4	LOC102723701	0.31	ASH2L	0.3	LSM1	0.29	DDHD2	0.29	KCNU1	0.22	BAG4	0.18
Breast_SE_2605	ZNF703	0.72	ERLIN2	0.69	LSM1	0.68	LOC102723701	0.66	ASH2L	0.66	DDHD2	0.58	BRF2	0.55	RAB11FIP1	0.52	BAG4	0.49	LOC101929622	0.4
Breast_SE_2606	RAB11FIP1	0.68	DDHD2	0.46	ASH2L	0.46	LSM1	0.44	BAG4	0.42	LOC101929622	0.39	ADRB3	0.36	BRF2	0.32	RNF5P1	0.32	ZNF703	0.32
Breast_SE_2607	ASH2L	0.55	DDHD2	0.54	EIF4EBP1	0.48	C8orf86	0.46	LSM1	0.46	ZNF703	0.43	FGFR1	0.42	LOC102723701	0.4	RAB11FIP1	0.34	LOC728024	0.33
Breast_SE_2608	ASH2L	0.59	DDHD2	0.57	LSM1	0.54	FGFR1	0.52	EIF4EBP1	0.45	LOC102723701	0.45	C8orf86	0.42	ERLIN2	0.41	BAG4	0.41	LOC728024	0.41
Breast_SE_2609	ASH2L	0.73	LSM1	0.72	DDHD2	0.68	BAG4	0.61	LOC102723701	0.59	LOC728024	0.55	C8orf86	0.55	EIF4EBP1	0.53	ERLIN2	0.51	BRF2	0.42
Breast_SE_2612	FGFR1	0.83	LSM1	0.7	ASH2L	0.69	C8orf86	0.69	DDHD2	0.65	LOC102723701	0.58	BAG4	0.57	LOC728024	0.53	HTRA4	0.47	BRF2	0.45
Breast_SE_2614	EIF4EBP1	0.62	ASH2L	0.42	ADAM9	0.37	LSM1	0.37	TACC1	0.36	DDHD2	0.27	ADRB3	0.21	ADAM3A	0.2	FGFR1	0.19	HTRA4	0.14
Breast_SE_2615	PLEKHA2	0.78	TM2D2	0.67	ADAM9	0.58	LSM1	0.52	BAG4	0.5	DDHD2	0.49	ADAM32	0.46	TACC1	0.45	EIF4EBP1	0.44	HTRA4	0.42
Breast_SE_2616	LSM1	0.7	TM2D2	0.69	ADAM9	0.67	ASH2L	0.67	FGFR1	0.6	DDHD2	0.59	PLEKHA2	0.55	ADAM32	0.54	BAG4	0.53	TACC1	0.43
Breast_SE_2617	IDO1	0.72	LOC100130964	0.48	IDO2	0.46	ADAM18	0.45	TACC1	0.4	TM2D2	0.38	PLEKHA2	0.35	ADAM3A	0.35	FGFR1	0.2	ADAM32	0.18
Breast_SE_2618	IDO2	0.15	ADAM5	0.13	ZMAT4	0.11	GOLGA7	0.09	HTRA4	0.07	LOC102723729	0.01	GINS4	0	SFRP1	0	MIR548AO	0	RNF5P1	0
Breast_SE_2619	HTRA4	0.2	PLEKHA2	0.13	SFRP1	0.12	LOC102723729	0.1	GINS4	0.08	TACC1	0.04	ZMAT4	0.02	GOLGA7	0	IDO1	0	IDO2	0
Breast_SE_2620	ZMAT4	0.42	NKX6-3	0.27	ADAM5	0.22	LOC102723729	0.21	GINS4	0.18	ADAM3A	0.16	GOLGA7	0.16	HTRA4	0.09	LOC100130964	0.06	IDO2	0.05
Breast_SE_2621	ZMAT4	0.71	ADAM3A	0.31	GOLGA7	0.2	ADAM2	0.18	ADAM32	0.11	GINS4	0.07	LOC102723729	0.07	LOC100130964	0.06	ADAM18	0.04	TM2D2	0
Breast_SE_2622	SFRP1	0.71	MIR548AO	0.59	IKBKB	0.53	LOC102723729	0.52	GINS4	0.51	GOLGA7	0.44	AP3M2	0.39	KAT6A	0.38	ANK1	0.38	PLAT	0.31
Breast_SE_2623	ANK1	0.84	AP3M2	0.71	GINS4	0.59	LOC102723729	0.57	PLAT	0.51	MIR486-2	0.5	MIR486-1	0.5	CHRNB3	0.45	VDAC3	0.42	IKBKB	0.34
Breast_SE_2625	PLAT	0.73	AP3M2	0.63	ANK1	0.53	LOC102723729	0.47	GINS4	0.45	MIR486-2	0.38	MIR486-1	0.38	THAP1	0.28	CHRNB3	0.27	VDAC3	0.26
Breast_SE_2626	IKBKB	0.62	PLAT	0.48	LOC101929897	0.42	MIR4469	0.34	SLC20A2	0.32	DKK4	0.32	RNF170	0.28	HOOK3	0.25	AP3M2	0.2	POLB	0.12
Breast_SE_2627	SLC20A2	0.51	POMK	0.44	KAT6A	0.39	IKBKB	0.3	POLB	0.29	HOOK3	0.25	SMIM19	0.23	MIR486-2	0.22	CHRNB3	0.17	AP3M2	0.16
Breast_SE_2628	VDAC3	0.83	RNF170	0.8	FNTA	0.76	THAP1	0.74	POLB	0.65	HOOK3	0.63	AP3M2	0.52	KAT6A	0.51	IKBKB	0.48	HGSNAT	0.48
Breast_SE_2629	HOOK3	0.71	HGSNAT	0.67	KAT6A	0.64	FNTA	0.63	SMIM19	0.63	AP3M2	0.61	RNF170	0.59	VDAC3	0.58	POMK	0.58	IKBKB	0.56
Breast_SE_2630	VDAC3	0.78	FNTA	0.67	HOOK3	0.61	AP3M2	0.61	THAP1	0.59	KAT6A	0.53	RNF170	0.51	HGSNAT	0.51	POLB	0.47	SMIM19	0.47
Breast_SE_2631	VDAC3	0.77	FNTA	0.67	HOOK3	0.61	AP3M2	0.61	THAP1	0.59	KAT6A	0.53	RNF170	0.51	HGSNAT	0.51	POLB	0.47	SMIM19	0.47
Breast_SE_2632	VDAC3	0.77	FNTA	0.67	HOOK3	0.61	AP3M2	0.61	THAP1	0.59	KAT6A	0.52	RNF170	0.51	HGSNAT	0.51	POLB	0.47	SMIM19	0.47
Breast_SE_2633	POTEA	0.56	LOC100287846	0.52	LOC101929217	0.43	LOC101929268	0.36	HGSNAT	0.34	SPIDR	0.32	UBE2V2	0.27	FNTA	0.24	THAP1	0.2	CEBPD	0.19
Breast_SE_2634	POTEA	0.6	LOC100287846	0.54	LOC101929217	0.48	LOC101929268	0.38	HGSNAT	0.37	UBE2V2	0.33	SPIDR	0.32	POMK	0.29	FNTA	0.25	HOOK3	0.19
Breast_SE_2635	POTEA	0.53	LOC100287846	0.52	LOC101929217	0.41	HGSNAT	0.34	SPIDR	0.33	LOC101929268	0.32	UBE2V2	0.28	FNTA	0.24	CEBPD	0.18	POMK	0.14
Breast_SE_2636	CEBPD	0.38	MIR4469	0.27	SNTG1	0.23	PRKDC	0.16	HGSNAT	0.07	LINC00293	0.06	SNAI2	0.05	MCM4	0.02	LOC100507464	0	POMK	0
Breast_SE_2637	CEBPD	0.6	UBE2V2	0.37	SPIDR	0.35	PCMTD1	0.33	PXDNL	0.32	SNTG1	0.3	PRKDC	0.2	LINC00293	0.17	MCM4	0.15	LOC100287846	0.14
Breast_SE_2639	CEBPD	0.79	MCM4	0.51	UBE2V2	0.5	PRKDC	0.46	SPIDR	0.42	LOC100287846	0.3	SNTG1	0.3	PXDNL	0.29	PCMTD1	0.26	SNAI2	0.21
Breast_SE_2640	SNAI2	0.77	LOC101929268	0.59	EFCAB1	0.4	CEBPD	0.4	LOC101929217	0.4	PRKDC	0.31	ST18	0.28	PXDNL	0.26	UBE2V2	0.18	SNTG1	0.16
Breast_SE_2641	SNAI2	0.79	LOC101929268	0.66	EFCAB1	0.57	LOC101929217	0.51	CEBPD	0.44	UBE2V2	0.43	NPBWR1	0.39	PXDNL	0.34	RB1CC1	0.27	PRKDC	0.27
Breast_SE_2642	LOC101929268	0.67	SNAI2	0.67	LOC101929217	0.57	EFCAB1	0.55	UBE2V2	0.39	PXDNL	0.37	NPBWR1	0.33	CEBPD	0.32	RB1CC1	0.3	SNTG1	0.26
Breast_SE_2643	SNAI2	0.57	LOC101929268	0.55	LOC101929217	0.5	EFCAB1	0.49	UBE2V2	0.36	PXDNL	0.36	CEBPD	0.34	PRKDC	0.24	RB1CC1	0.23	PCMTD1	0.23
Breast_SE_2644	SNAI2	0.35	PRKDC	0.26	CEBPD	0.12	ST18	0.1	LOC101929268	0.09	MCM4	0.09	EFCAB1	0	LOC100507464	0	LOC101929341	0	LINC00293	0
Breast_SE_2645	SNAI2	0.84	LOC101929268	0.62	EFCAB1	0.48	PXDNL	0.42	LOC101929217	0.42	UBE2V2	0.23	CEBPD	0.22	RB1CC1	0.21	NPBWR1	0.13	ST18	0.12
Breast_SE_2646	PCMTD1	0.67	RB1CC1	0.57	PXDNL	0.44	SNTG1	0.33	MRPL15	0.26	TCEA1	0.24	ATP6V1H	0.15	LYPLA1	0.14	NPBWR1	0.12	OPRK1	0.09
Breast_SE_2649	ST18	0.25	PXDNL	0.22	SBF1P1	0.2	PCMTD1	0.14	XKR4	0.1	NPBWR1	0.07	TCEA1	0.06	TMEM68	0.04	RNU105C	0	LOC101929341	0
Breast_SE_2651	RGS20	0.86	LYN	0.62	MRPL15	0.4	TGS1	0.39	ATP6V1H	0.23	RP1	0.23	SOX17	0.22	XKR4	0.21	RPS20	0.19	SBF1P1	0.18
Breast_SE_2652	SOX17	0.91	PLAG1	0.46	LYN	0.18	SNORD54	0.15	XKR4	0.12	TGS1	0.1	TCEA1	0.05	RGS20	0.05	SBF1P1	0.01	RNU105C	0
Breast_SE_2653	SOX17	0.93	OPRK1	0.61	PLAG1	0.49	RP1	0.38	LYN	0.35	CHCHD7	0.26	TGS1	0.2	RGS20	0.19	MRPL15	0.17	TCEA1	0.1
Breast_SE_2654	LYN	0.72	RP1	0.39	PLAG1	0.33	XKR4	0.33	SOX17	0.21	TGS1	0.19	SNORD54	0.15	CHCHD7	0.13	MOS	0	SDR16C6P	0
Breast_SE_2655	SNORD54	0.12	LOC286177	0.07	MOS	0	LYN	0	LOC101929488	0	PENK	0	SDR16C5	-0.1	LOC101929415	-0.1	LINC00588	-0.1	SBF1P1	-0.1
Breast_SE_2657	LOC100505501	0.48	TOX	0.41	IMPAD1	0.28	LOC101929415	0.2	NSMAF	0.2	LINC00968	0.16	LOC100130298	0.15	SDCBP	0.06	FAM110B	0.01	LINC00588	0
Breast_SE_2660	RAB2A	0.74	LOC100130298	0.62	SDCBP	0.55	FAM110B	0.55	LINC01301	0.41	TTPA	0.4	CA8	0.37	GGH	0.36	LOC100505501	0.34	NSMAF	0.33
Breast_SE_2663	ASPH	0.76	CLVS1	0.73	MIR4470	0.66	LINC01289	0.4	LOC102724623	0.3	UG0898H09	0.3	LOC100130298	0.26	LOC100505501	0.23	GGH	0.11	NKAIN3	0.08
Breast_SE_2667	PDE7A	0.59	C8orf44	0.52	MCMDC2	0.45	VCPIP1	0.45	MTFR1	0.44	ARMC1	0.43	C8orf46	0.42	MYBL1	0.36	ADHFE1	0.25	DNAJC5B	0.21
Breast_SE_2668	PDE7A	0.59	C8orf44	0.52	MCMDC2	0.45	VCPIP1	0.45	MTFR1	0.44	ARMC1	0.43	C8orf46	0.43	MYBL1	0.36	ADHFE1	0.26	DNAJC5B	0.22
Breast_SE_2669	PDE7A	0.59	C8orf44	0.52	MCMDC2	0.46	VCPIP1	0.46	MTFR1	0.44	ARMC1	0.43	C8orf46	0.43	MYBL1	0.36	ADHFE1	0.26	DNAJC5B	0.22
Breast_SE_2670	PDE7A	0.59	C8orf44	0.52	MCMDC2	0.46	VCPIP1	0.45	MTFR1	0.44	ARMC1	0.43	C8orf46	0.43	MYBL1	0.36	ADHFE1	0.25	DNAJC5B	0.22
Breast_SE_2671	PDE7A	0.59	C8orf44	0.52	MCMDC2	0.46	VCPIP1	0.45	MTFR1	0.44	ARMC1	0.43	C8orf46	0.43	MYBL1	0.36	ADHFE1	0.26	DNAJC5B	0.22
Breast_SE_2674	C8orf44	0.62	MYBL1	0.51	DNAJC5B	0.41	C8orf46	0.33	CRH	0.32	TRIM55	0.25	VCPIP1	0.24	ARMC1	0.24	SNHG6	0.21	ADHFE1	0.21
Breast_SE_2675	MYBL1	0.78	C8orf46	0.66	COPS5	0.45	SNHG6	0.44	C8orf44	0.44	MCMDC2	0.43	VCPIP1	0.43	DNAJC5B	0.32	ADHFE1	0.27	TRIM55	0.21
Breast_SE_2678	SULF1	0.69	TCF24	0.66	NCOA2	0.31	COPS5	0.22	C8orf34	0.21	MCMDC2	0.1	CSPP1	0.09	LACTB2	0.09	XKR9	0.06	SNHG6	0.04
Breast_SE_2680	SLCO5A1	0.57	NCOA2	0.52	PRDM14	0.39	LACTB2	0.28	XKR9	0.22	RPL7	0.18	TERF1	0.17	PREX2	0.09	SULF1	0.09	SBSPON	0.08
Breast_SE_2681	SLCO5A1	0.58	NCOA2	0.51	PRDM14	0.41	LACTB2	0.29	XKR9	0.22	TERF1	0.19	RPL7	0.18	SULF1	0.1	PREX2	0.1	SBSPON	0.08
Breast_SE_2682	SLCO5A1	0.58	NCOA2	0.51	PRDM14	0.41	LACTB2	0.29	XKR9	0.22	TERF1	0.19	RPL7	0.18	SULF1	0.1	PREX2	0.1	SBSPON	0.08
Breast_SE_2683	SLCO5A1	0.57	NCOA2	0.51	PRDM14	0.41	LACTB2	0.29	XKR9	0.22	TERF1	0.19	RPL7	0.18	SULF1	0.1	PREX2	0.09	SBSPON	0.08
Breast_SE_2684	SLCO5A1	0.57	NCOA2	0.51	PRDM14	0.41	LACTB2	0.29	XKR9	0.22	TERF1	0.19	RPL7	0.18	SULF1	0.1	PREX2	0.1	SBSPON	0.08
Breast_SE_2685	SLCO5A1	0.57	NCOA2	0.51	PRDM14	0.41	LACTB2	0.29	XKR9	0.22	TERF1	0.19	RPL7	0.18	SULF1	0.1	PREX2	0.09	SBSPON	0.08
Breast_SE_2686	SLCO5A1	0.57	NCOA2	0.51	PRDM14	0.41	LACTB2	0.29	XKR9	0.22	TERF1	0.19	RPL7	0.18	SULF1	0.1	PREX2	0.09	SBSPON	0.08
Breast_SE_2687	MSC	0.89	EYA1	0.67	TRAM1	0.42	TERF1	0.39	LACTB2	0.3	TRPA1	0.25	RPL7	0.21	TMEM70	0.17	KCNB2	0.14	PRDM14	0.06
Breast_SE_2688	SBSPON	0.97	TERF1	0.67	TMEM70	0.55	MSC	0.53	UBE2W	0.51	LY96	0.44	RPL7	0.28	STAU2	0.23	RDH10	0.14	TRPA1	0.12
Breast_SE_2689	RDH10	0.48	STAU2-AS1	0.42	STAU2	0.2	SBSPON	0.13	KCNB2	0.08	RPL7	0.06	UBE2W	0.01	PI15	0.01	LOC101926908	0	MIR5681A	0
Breast_SE_2690	STAU2-AS1	0.57	RDH10	0.39	KCNB2	0.35	PI15	0.15	STAU2	0.13	JPH1	0.1	GDAP1	0	MIR5681A	0	MIR5681B	0	MIR2052	0
Breast_SE_2693	GDAP1	0.33	UBE2W	0.32	TERF1	0.31	STAU2	0.26	SBSPON	0.19	RPL7	0.14	LINC01111	0.12	CRISPLD1	0.11	CASC9	0.08	ZFHX4-AS1	0.02
Breast_SE_2694	ZFHX4	0.92	ZFHX4-AS1	0.79	TMEM70	0.59	PEX2	0.5	LY96	0.46	IL7	0.45	ZC2HC1A	0.34	CRISPLD1	0.32	GDAP1	0.31	PKIA	0.28
Breast_SE_2695	STMN2	0.7	LOC101241902	0.64	PEX2	0.61	IL7	0.59	ZC2HC1A	0.51	FABP12	0.38	MRPS28	0.33	FABP5	0.28	HEY1	0.26	PAG1	0.24
Breast_SE_2696	TPD52	0.77	PMP2	0.23	SLC10A5	0.22	ZNF704	0.09	ZBTB10	0.01	FABP9	0	ZC2HC1A	-0.1	MIR5708	-0.1	HEY1	-0.1	FABP12	-0.2
Breast_SE_2697	ZBTB10	0.84	ZNF704	0.39	PAG1	0.33	HEY1	0.26	SNX16	0.23	MRPS28	0.18	FABP12	0.18	MIR5708	0.13	ZFAND1	0.11	IL7	0.11
Breast_SE_2698	ZBTB10	0.84	ZNF704	0.39	PAG1	0.33	HEY1	0.26	SNX16	0.23	FABP12	0.18	MRPS28	0.18	MIR5708	0.13	ZFAND1	0.11	IL7	0.11
Breast_SE_2699	ZBTB10	0.84	ZNF704	0.39	PAG1	0.33	HEY1	0.26	SNX16	0.23	FABP12	0.18	MRPS28	0.18	MIR5708	0.13	ZFAND1	0.12	IL7	0.11
Breast_SE_2700	ZBTB10	0.84	ZNF704	0.39	PAG1	0.33	HEY1	0.26	SNX16	0.23	FABP12	0.18	MRPS28	0.18	MIR5708	0.13	ZFAND1	0.11	IL7	0.11
Breast_SE_2701	ZBTB10	0.84	ZNF704	0.39	PAG1	0.33	HEY1	0.26	SNX16	0.23	FABP12	0.18	MRPS28	0.18	MIR5708	0.13	ZFAND1	0.11	IL7	0.11
Breast_SE_2702	ZBTB10	0.84	ZNF704	0.39	PAG1	0.33	HEY1	0.26	SNX16	0.23	MRPS28	0.18	FABP12	0.18	MIR5708	0.13	ZFAND1	0.11	IL7	0.11
Breast_SE_2703	ZBTB10	0.84	ZNF704	0.39	PAG1	0.33	HEY1	0.26	SNX16	0.22	MRPS28	0.18	FABP12	0.18	MIR5708	0.13	ZFAND1	0.11	IL7	0.11
Breast_SE_2704	ZBTB10	0.84	ZNF704	0.39	PAG1	0.33	HEY1	0.25	SNX16	0.23	FABP12	0.18	MRPS28	0.18	MIR5708	0.13	ZFAND1	0.11	IL7	0.11
Breast_SE_2705	ZBTB10	0.84	ZNF704	0.39	PAG1	0.33	HEY1	0.26	SNX16	0.23	MRPS28	0.18	FABP12	0.18	MIR5708	0.13	ZFAND1	0.11	IL7	0.11
Breast_SE_2706	ZBTB10	0.84	ZNF704	0.39	PAG1	0.33	HEY1	0.25	SNX16	0.23	MRPS28	0.18	FABP12	0.18	MIR5708	0.13	IL7	0.11	ZFAND1	0.11
Breast_SE_2707	ZBTB10	0.84	ZNF704	0.39	PAG1	0.33	HEY1	0.26	SNX16	0.23	FABP12	0.18	MRPS28	0.18	MIR5708	0.13	ZFAND1	0.11	IL7	0.11
Breast_SE_2708	ZBTB10	0.84	ZNF704	0.39	PAG1	0.33	HEY1	0.25	SNX16	0.23	MRPS28	0.18	FABP12	0.18	MIR5708	0.12	ZFAND1	0.11	IL7	0.11
Breast_SE_2713	CA2	0.74	SLC7A13	0.38	LRRCC1	0.33	PSKH2	0.31	E2F5	0.25	CA3	0.25	CA1	0.21	WWP1	0.11	RMDN1	0.05	CA13	0.01
Breast_SE_2717	OSGIN2	0.69	RIPK2	0.51	DECR1	0.45	LOC101929709	0.44	NBN	0.43	LINC01030	0.38	TMEM64	0.35	OTUD6B-AS1	0.34	RUNX1T1	0.16	CALB1	0.16
Breast_SE_2719	DECR1	0.76	TMEM64	0.52	OSGIN2	0.5	MMP16	0.44	OTUD6B-AS1	0.39	C8orf88	0.37	NBN	0.32	LINC01030	0.25	RUNX1T1	0.23	DCAF4L2	0.18
Breast_SE_2721	TMEM64	0.78	DECR1	0.62	TRIQK	0.6	NECAB1	0.58	C8orf88	0.54	FLJ46284	0.46	LINC01030	0.42	OTUD6B	0.32	NBN	0.3	RUNX1T1	0.28
Breast_SE_2724	PDP1	0.72	GEM	0.36	LINC00535	0.25	TMEM67	0.16	MIR378D2	0.13	DPY19L4	0.12	TRIQK	0.09	C8orf87	0	MIR8084	0	RBM12B-AS1	0
Breast_SE_2726	GEM	0.71	PDP1	0.58	DPY19L4	0.48	LINC00535	0.34	RAD54B	0.24	INTS8	0.18	FSBP	0.16	MIR378D2	0.08	MIR3150B	0	MIR3150A	0
Breast_SE_2727	ESRP1	0.98	LOC100288748	0.86	PLEKHF2	0.68	NDUFAF6	0.43	CCNE2	0.32	TP53INP1	0.2	LINC01298	0.2	C8orf37	0.18	INTS8	0.13	C8orf37-AS1	0.12
Breast_SE_2729	LOC100288748	0.83	ESRP1	0.79	PLEKHF2	0.7	NDUFAF6	0.59	LINC01298	0.36	CCNE2	0.32	TP53INP1	0.22	RAD54B	0.13	C8orf37	0.1	INTS8	0.09
Breast_SE_2730	LOC100288748	0.66	ESRP1	0.6	PLEKHF2	0.53	LINC01298	0.44	NDUFAF6	0.35	TP53INP1	0.28	C8orf37-AS1	0.1	C8orf37	0.08	RAD54B	0.02	MIR3150A	0
Breast_SE_2732	SDC2	0.92	LOC101927066	0.59	CPQ	0.59	LOC102724804	0.45	MTERF3	0.39	GDF6	0.37	C8orf37	0.36	UQCRB	0.3	MTDH	0.25	RPL30	0.16
Breast_SE_2735	TSPYL5	0.58	LAPTM4B	0.48	PTDSS1	0.3	SDC2	0.28	MATN2	0.28	STK3	0.24	ERICH5	0.22	RPL30	0.21	MTERF3	0.17	CPQ	0.13
Breast_SE_2737	KCNS2	0.7	MTDH	0.65	CPQ	0.58	POP1	0.46	NIPAL2	0.44	STK3	0.31	LOC101927066	0.29	RPL30	0.23	MATN2	0.21	VPS13B	0.19
Breast_SE_2738	OSR2	0.73	STK3	0.69	ERICH5	0.41	SPAG1	0.39	VPS13B	0.38	COX6C	0.35	FBXO43	0.29	POLR2K	0.24	LAPTM4B	0.24	KCNS2	0.24
Breast_SE_2739	OSR2	0.67	VPS13B	0.54	STK3	0.53	MATN2	0.44	COX6C	0.41	FBXO43	0.38	LAPTM4B	0.38	RGS22	0.29	MIR599	0.26	POLR2K	0.26
Breast_SE_2742	RGS22	0.7	COX6C	0.64	VPS13B	0.57	MIR599	0.53	MIR875	0.47	MIR7705	0.29	OSR2	0.28	ANKRD46	0.28	ZNF706	0.25	PABPC1	0.23
Breast_SE_2744	RNF19A	0.69	VPS13B	0.62	MIR875	0.61	GRHL2	0.56	ANKRD46	0.46	POLR2K	0.43	YWHAZ	0.38	MIR599	0.38	PABPC1	0.35	MIR7705	0.35
Breast_SE_2745	GRHL2	0.83	MIR875	0.39	RNF19A	0.35	MIR599	0.31	COX6C	0.23	ANKRD46	0.23	SNX31	0.16	POLR2K	0.09	NACAP1	0.07	NCALD	0.07
Breast_SE_2746	PABPC1	0.71	MIR7705	0.59	ZNF706	0.5	COX6C	0.41	POLR2K	0.33	MIR875	0.32	YWHAZ	0.26	RNF19A	0.21	MIR599	0.19	FBXO43	0.18
Breast_SE_2747	PABPC1	0.69	MIR7705	0.51	ZNF706	0.47	COX6C	0.32	FBXO43	0.31	MIR875	0.25	YWHAZ	0.24	POLR2K	0.23	RNF19A	0.16	MIR599	0.16
Breast_SE_2748	ZNF706	0.51	COX6C	0.48	YWHAZ	0.47	POLR2K	0.42	ANKRD46	0.42	PABPC1	0.38	RGS22	0.31	MIR7705	0.31	MIR875	0.27	SPAG1	0.23
Breast_SE_2749	YWHAZ	0.33	PABPC1	0.32	COX6C	0.24	MIR7705	0.24	SPAG1	0.23	RRM2B	0.21	FBXO43	0.19	ZNF706	0.19	POLR2K	0.17	RGS22	0.16
Breast_SE_2750	UBR5	0.68	MIR7705	0.6	PABPC1	0.58	RNF19A	0.54	ZNF706	0.47	RRM2B	0.4	POLR2K	0.39	YWHAZ	0.33	RGS22	0.33	NCALD	0.2
Breast_SE_2751	UBR5	0.68	MIR7705	0.6	PABPC1	0.58	RNF19A	0.54	ZNF706	0.46	RRM2B	0.4	POLR2K	0.39	YWHAZ	0.33	RGS22	0.32	NCALD	0.2
Breast_SE_2752	UBR5	0.68	MIR7705	0.6	PABPC1	0.58	RNF19A	0.54	ZNF706	0.46	RRM2B	0.4	POLR2K	0.39	YWHAZ	0.33	RGS22	0.32	NCALD	0.2
Breast_SE_2753	UBR5	0.68	MIR7705	0.6	PABPC1	0.58	RNF19A	0.54	ZNF706	0.46	RRM2B	0.4	POLR2K	0.39	YWHAZ	0.33	RGS22	0.32	NCALD	0.2
Breast_SE_2754	UBR5	0.68	MIR7705	0.6	PABPC1	0.58	RNF19A	0.54	ZNF706	0.46	RRM2B	0.4	POLR2K	0.39	YWHAZ	0.33	RGS22	0.32	NCALD	0.2
Breast_SE_2755	GRHL2	0.66	ANKRD46	0.43	RNF19A	0.41	POLR2K	0.39	UBR5	0.35	NCALD	0.27	MIR7705	0.25	SPAG1	0.24	YWHAZ	0.21	PABPC1	0.18
Breast_SE_2756	ATP6V1C1	0.52	NCALD	0.5	RRM2B	0.45	PABPC1	0.43	YWHAZ	0.41	FLJ42969	0.4	MIR7705	0.4	ZNF706	0.32	RNF19A	0.21	AZIN1	0.2
Breast_SE_2757	NCALD	0.72	GRHL2	0.26	BAALC	0.07	MIR3151	0.04	ODF1	0.01	ZNF706	0	MIR5680	0	BAALC-AS1	0	LINC01181	0	FLJ42969	0
Breast_SE_2758	MIR3151	0.53	UBR5	0.53	BAALC-AS1	0.41	DCAF13	0.39	ATP6V1C1	0.35	RRM2B	0.34	AZIN1	0.34	FZD6	0.32	LINC01181	0.27	ZNF706	0.25
Breast_SE_2759	UBR5	0.53	BAALC-AS1	0.45	DCAF13	0.43	MIR3151	0.43	ATP6V1C1	0.38	AZIN1	0.35	RRM2B	0.35	FZD6	0.33	ZNF706	0.32	KLF10	0.3
Breast_SE_2760	UBR5	0.53	RRM2B	0.49	BAALC	0.48	BAALC-AS1	0.48	CTHRC1	0.46	KLF10	0.43	DCAF13	0.41	ODF1	0.39	AZIN1	0.39	SLC25A32	0.29
Breast_SE_2761	DCAF13	0.49	SLC25A32	0.33	UBR5	0.33	ATP6V1C1	0.27	BAALC-AS1	0.25	AZIN1	0.2	MIR3151	0.16	FZD6	0.14	BAALC	0.14	RRM2B	0.13
Breast_SE_2765	RIMS2	0.62	MIR3151	0.47	FZD6	0.34	LINC01181	0.23	UBR5	0.15	DCSTAMP	0.04	MIR548A3	0.01	MIR5680	0	KLF10	0	SLC25A32	0
Breast_SE_2767	OXR1	0.47	RIMS2	0.41	SYBU	0.15	ANGPT1	0.11	EMC2	0.04	ABRA	0.01	TMEM74	0	ENY2	0	RSPO2	0	DCSTAMP	0
Breast_SE_2768	OXR1	0.67	ABRA	0.48	EMC2	0.32	DCSTAMP	0.2	ENY2	0.18	PKHD1L1	0.17	LOC100132813	0.16	SYBU	0.13	MIR548A3	0.12	EBAG9	0.1
Breast_SE_2769	ANGPT1	0	ABRA	0	RSPO2	0	OXR1	0	EIF3E	0	EMC2	0	ZFPM2-AS1	0	TMEM74	0	ZFPM2	0	NUDCD1	0
Breast_SE_2770	TRPS1	0.8	AARD	0.48	LINC00536	0.18	RAD21-AS1	0.17	RAD21	0.16	LOC101927513	0.11	COLEC10	0.08	EIF3H	0.05	MIR3610	0.05	MAL2	0.04
Breast_SE_2771	TRPS1	0.82	AARD	0.53	MAL2	0.46	SAMD12	0.28	RAD21-AS1	0.27	SAMD12-AS1	0.23	RAD21	0.22	MIR3610	0.17	SLC30A8	0.03	MIR2053	0
Breast_SE_2773	SAMD12-AS1	0.58	TRPS1	0.57	SAMD12	0.49	MAL2	0.45	LINC00536	0.02	AARD	0.01	MIR2053	0	MIR548AZ	0	MIR3610	-0.1	RAD21-AS1	-0.1
Breast_SE_2774	AARD	0.71	MIR3610	0.7	RAD21-AS1	0.69	TRPS1	0.35	RAD21	0.35	MAL2	0.34	NOV	0.2	SAMD12	0.15	SAMD12-AS1	0.1	UTP23	0.06
Breast_SE_2775	AARD	0.61	MIR3610	0.58	RAD21-AS1	0.5	TRPS1	0.36	MAL2	0.34	RAD21	0.18	LINC00536	0.1	SAMD12-AS1	0.09	COLEC10	0.08	NOV	0.04
Breast_SE_2776	MAL2	0.48	AARD	0.4	TRPS1	0.37	MIR3610	0.35	SAMD12-AS1	0.33	RAD21-AS1	0.25	LINC00536	0.23	SAMD12	0.19	COLEC10	0.16	LOC101927513	0.12
Breast_SE_2777	TRPS1	0.57	AARD	0.53	RAD21-AS1	0.28	LINC00536	0.27	MIR3610	0.26	MAL2	0.23	RAD21	0.2	COLEC10	0.18	LOC101927513	0.13	ENPP2	0.13
Breast_SE_2779	AARD	0.86	RAD21-AS1	0.84	RAD21	0.74	MIR3610	0.73	UTP23	0.52	NOV	0.5	MED30	0.46	EIF3H	0.45	TRPS1	0.27	MAL2	0.21
Breast_SE_2781	EXT1	0.77	NOV	0.56	TNFRSF11B	0.44	ENPP2	0.38	TAF2	0.37	EIF3H	0.37	MED30	0.36	LOC101927513	0.27	AARD	0.25	MIR3610	0.23
Breast_SE_2782	SLC30A8	0.63	ENPP2	0.49	COLEC10	0.46	MED30	0.46	LOC101927513	0.38	EIF3H	0.36	DSCC1	0.36	EXT1	0.36	TAF2	0.28	AARD	0.25
Breast_SE_2783	EXT1	0.45	ENPP2	0.31	SLC30A8	0.28	DEPTOR	0.17	TAF2	0.13	TNFRSF11B	0.11	MED30	0.1	AARD	0.09	DSCC1	0.09	UTP23	0.09
Breast_SE_2784	TNFRSF11B	0.34	DSCC1	0.26	COLEC10	0.25	LOC101927513	0.16	MAL2	0.08	AARD	0.04	MTBP	0.02	DEPTOR	0.01	MIR548AZ	0	MED30	0
Breast_SE_2785	MAL2	0.91	SAMD12	0.53	SAMD12-AS1	0.51	MIR548AZ	0	LOC101927543	0	SNTB1	0	DEPTOR	-0.1	TAF2	-0.1	MTBP	-0.1	MED30	-0.1
Breast_SE_2789	DSCC1	0.22	ENPP2	0.11	DERL1	0.11	LOC101927513	0.09	DEPTOR	0.05	HAS2	0.03	MTBP	0.02	COL14A1	0.01	MAL2	0.01	HAS2-AS1	0.01
Breast_SE_2790	HAS2	0.75	HAS2-AS1	0.75	C8orf76	0.46	ZHX1-C8orf76	0.42	DERL1	0.41	MRPL13	0.4	MTBP	0.38	TBC1D31	0.38	DEPTOR	0.37	LOC101927543	0.35
Breast_SE_2792	HAS2	0.44	HAS2-AS1	0.35	LOC101927543	0.31	FAM83A	0.25	DERL1	0.17	FAM83A-AS1	0.14	SNTB1	0.1	TBC1D31	0.09	MIR548AA1	0.03	MIR548D1	0.03
Breast_SE_2793	FAM83A	0.22	HAS2	0.12	MIR548AA1	0.08	MIR548D1	0.08	FAM83A-AS1	0.08	FAM91A1	0.02	ATAD2	0	TBC1D31	0	WDYHV1	0	MIR4663	0
Breast_SE_2794	MIR4663	0.42	WDYHV1	0.39	DERL1	0.37	C8orf76	0.35	HAS2	0.32	ZHX1-C8orf76	0.29	HAS2-AS1	0.29	FBXO32	0.28	ZHX1	0.24	KLHL38	0.19
Breast_SE_2795	ZHX2	0.33	ANXA13	0.32	MIR548AA1	0.04	MIR548D1	0.04	FAM91A1	0.04	TBC1D31	0	KLHL38	0	HAS2-AS1	0	FBXO32	-0.1	HAS2	-0.1
Breast_SE_2796	ZHX2	0.77	MIR548AA1	0.47	MIR548D1	0.47	MIR4663	0.17	ANXA13	0.03	FER1L6	0	FAM83A	0	FAM83A-AS1	-0.1	KLHL38	-0.1	FAM91A1	-0.1
Breast_SE_2797	FAM83A	0.57	FAM83A-AS1	0.38	MIR4663	0.35	FER1L6-AS2	0.24	TBC1D31	0.19	DERL1	0.18	FER1L6	0.17	ATAD2	0.06	ZHX2	0.02	FAM91A1	0.02
Breast_SE_2798	ZHX1	0.8	ZHX1-C8orf76	0.78	C8orf76	0.76	ATAD2	0.69	DERL1	0.66	TBC1D31	0.66	FBXO32	0.58	KLHL38	0.57	FAM91A1	0.5	ANXA13	0.42
Breast_SE_2799	ZHX1	0.8	ZHX1-C8orf76	0.78	C8orf76	0.76	ATAD2	0.69	TBC1D31	0.67	DERL1	0.66	FBXO32	0.57	KLHL38	0.56	FAM91A1	0.5	ANXA13	0.42
Breast_SE_2800	ZHX1	0.8	ZHX1-C8orf76	0.78	C8orf76	0.76	ATAD2	0.69	TBC1D31	0.67	DERL1	0.66	FBXO32	0.57	KLHL38	0.57	FAM91A1	0.5	ANXA13	0.42
Breast_SE_2801	ZHX1	0.8	ZHX1-C8orf76	0.78	C8orf76	0.76	ATAD2	0.69	TBC1D31	0.67	DERL1	0.66	FBXO32	0.58	KLHL38	0.57	FAM91A1	0.5	ANXA13	0.42
Breast_SE_2802	FBXO32	0.5	WDYHV1	0.37	KLHL38	0.36	ZHX1	0.35	ANXA13	0.32	ZHX1-C8orf76	0.3	ATAD2	0.3	C8orf76	0.28	TBC1D31	0.25	DERL1	0.2
Breast_SE_2803	FBXO32	0.74	KLHL38	0.47	ZHX1	0.26	FER1L6-AS1	0.24	WDYHV1	0.24	FAM91A1	0.18	ZHX1-C8orf76	0.16	DERL1	0.13	FER1L6	0.12	FER1L6-AS2	0.12
Breast_SE_2804	RNF139-AS1	0.59	TRMT12	0.42	TMEM65	0.39	MIR6844	0.35	FER1L6-AS1	0.31	FBXO32	0.31	RNF139	0.27	TATDN1	0.27	MIR548AA1	0.23	NDUFB9	0.23
Breast_SE_2805	TATDN1	0.79	MIR6844	0.74	RNF139-AS1	0.72	TRMT12	0.69	NSMCE2	0.69	RNF139	0.68	NDUFB9	0.67	TMEM65	0.62	SQLE	0.55	ZNF572	0.37
Breast_SE_2806	RNF139-AS1	0.69	TATDN1	0.63	MIR6844	0.58	TMEM65	0.55	TRMT12	0.49	NSMCE2	0.48	NDUFB9	0.45	RNF139	0.45	SQLE	0.41	ZNF572	0.25
Breast_SE_2807	RNF139-AS1	0.3	TRIB1	0.27	NDUFB9	0.25	FAM91A1	0.19	TATDN1	0.18	FER1L6-AS2	0.17	LINC00964	0.17	MTSS1	0.15	RNF139	0.15	FER1L6	0.14
Breast_SE_2808	FER1L6-AS2	0.49	LINC00964	0.45	FER1L6	0.42	FER1L6-AS1	0.42	MTSS1	0.33	RNF139-AS1	0.18	SQLE	0.18	LOC101927588	0.11	MIR4662A	0	MIR4662B	0
Breast_SE_2810	SQLE	0.64	TATDN1	0.54	RNF139-AS1	0.48	NSMCE2	0.48	RNF139	0.45	NDUFB9	0.41	TRMT12	0.41	TMEM65	0.41	ZNF572	0.25	TRIB1	0.25
Breast_SE_2811	RNF139-AS1	0.7	TATDN1	0.69	TMEM65	0.61	NSMCE2	0.59	TRMT12	0.57	RNF139	0.51	SQLE	0.51	NDUFB9	0.44	TRIB1	0.24	LINC00964	0.14
Breast_SE_2812	TRIB1	0.27	TATDN1	0.11	ZNF572	0.06	SQLE	0.05	FER1L6-AS2	0.04	NDUFB9	0.04	RNF139-AS1	0.03	MIR4662A	0	MIR4662B	0	TMEM65	0
Breast_SE_2813	TRIB1	0.15	TATDN1	0.03	MIR4662A	0	MIR4662B	0	ZNF572	0	RNF139-AS1	0	MIR6844	0	TMEM65	0	FER1L6-AS1	0	SQLE	0
Breast_SE_2814	TATDN1	0.58	MIR6844	0.5	TMEM65	0.48	RNF139-AS1	0.47	TRIB1	0.45	NSMCE2	0.43	RNF139	0.34	SQLE	0.32	TRMT12	0.31	ZNF572	0.29
Breast_SE_2815	PCAT2	0.26	MIR6844	0.21	TATDN1	0.09	ZNF572	0.08	TMEM65	0.06	NSMCE2	0	MIR4662A	0	MIR4662B	0	TRIB1	0	TRMT12	0
Breast_SE_2816	FAM84B	0.88	PRNCR1	0.29	PCAT1	0.27	LINC00861	0.22	CASC11	0.22	CASC21	0.19	POU5F1B	0.15	LOC101927657	0.07	CCAT2	0.04	ZNF572	0
Breast_SE_2818	CCAT2	0.65	PRNCR1	0.44	CASC8	0.43	CASC11	0.31	CASC21	0.3	POU5F1B	0.28	MYC	0.15	TMEM75	0.04	CASC19	0.04	PCAT1	0
Breast_SE_2819	CCAT2	0.58	PRNCR1	0.41	CASC8	0.38	CASC21	0.24	CASC11	0.24	POU5F1B	0.22	MYC	0.08	TMEM75	0.01	CASC19	0	PCAT1	0
Breast_SE_2822	CASC8	0.72	MYC	0.51	TMEM75	0.47	PVT1	0.41	CCAT2	0.39	CASC19	0.38	CCAT1	0.35	MIR1204	0.34	PRNCR1	0.33	MIR1206	0.31
Breast_SE_2824	CASC8	0.54	CCAT2	0.48	CASC21	0.43	POU5F1B	0.41	TMEM75	0.38	MYC	0.37	MIR1206	0.33	MIR1204	0.32	PVT1	0.29	MIR1208	0.26
Breast_SE_2825	PVT1	0.67	MIR1204	0.56	TMEM75	0.49	MIR1207	0.47	MIR1205	0.47	MIR1206	0.45	PCAT2	0.42	MIR1208	0.41	CCAT1	0.27	CASC8	0.23
Breast_SE_2827	CCAT2	0.7	CASC21	0.36	POU5F1B	0.32	PRNCR1	0.15	CASC8	0.11	MIR1205	0.08	MIR3686	0	GSDMC	0	LINC00824	0	TMEM75	0
Breast_SE_2829	ASAP1-IT1	0.69	ASAP1	0.39	MIR5194	0.36	TMEM75	0.31	MIR1204	0.3	EFR3A	0.26	PVT1	0.25	MIR1206	0.22	MIR1207	0.19	MIR1205	0.16
Breast_SE_2830	ASAP1	0.69	FAM49B	0.48	EFR3A	0.37	ASAP1-IT1	0.35	HHLA1	0.3	OC90	0.3	ADCY8	0.3	LINC00977	0.23	MIR5194	0.13	MIR1205	0.12
Breast_SE_2831	LINC00824	0.46	OC90	0.43	HHLA1	0.42	ASAP1-IT1	0.31	ASAP1	0.21	FAM49B	0.11	MIR5194	0.07	GSDMC	0.03	ADCY8	0.01	MIR3686	0
Breast_SE_2832	KCNQ3	0.81	LRRC6	0.51	PHF20L1	0.47	ZFAT	0.44	ZFAT-AS1	0.4	TMEM71	0.37	NDRG1	0.29	ADCY8	0.21	ST3GAL1	0.19	EFR3A	0.12
Breast_SE_2833	NDRG1	0.68	TG	0.66	WISP1	0.54	KCNQ3	0.39	SLA	0.39	ZFAT-AS1	0.39	PHF20L1	0.32	ZFAT	0.27	LOC101927822	0.26	MIR30B	0.26
Breast_SE_2834	ST3GAL1	0.54	TG	0.53	WISP1	0.46	SLA	0.33	LOC101927822	0.3	PHF20L1	0.26	NCRNA00250	0.22	KCNQ3	0.18	NDRG1	0.15	ZFAT	0.14
[truncated: 2,046 more rows]

## Sheet: SE - gene distances
SE_name	Best correlating gene	Distance to gene bp	Pearson correlation
Breast_SE_10	ERRFI1	0	0.77
Breast_SE_1004	LMCD1	0	0.88
Breast_SE_1005	SSUH2	37537	0.64
Breast_SE_1006	CAV3	0	0.66
Breast_SE_1007	OXTR	63808	0.65
Breast_SE_1008	SRGAP3	132217	0.79
Breast_SE_101	TINAGL1	0	0.66
Breast_SE_1010	TADA3	0	0.71
Breast_SE_1011	TADA3	0	0.72
Breast_SE_1012	LOC401052	0	0.57
Breast_SE_1013	IRAK2	0	0.55
Breast_SE_1014	ATP2B2	222987	0.86
Breast_SE_1015	HRH1	0	0.58
Breast_SE_1016	HRH1	0	0.67
Breast_SE_1018	MKRN2OS	0	0.59
Breast_SE_1019	PPARG	0	0.55
Breast_SE_102	COL16A1	0	0.61
Breast_SE_1020	PPARG	0	0.82
Breast_SE_1022	RAF1	59032	0.63
Breast_SE_1023	TMEM40	0	0.76
Breast_SE_1024	IQSEC1	26381	0.71
Breast_SE_1025	HDAC11	0	0.81
Breast_SE_1027	WNT7A	0	0.88
Breast_SE_1029	FGD5	0	0.64
Breast_SE_103	CCDC28B	0	0.6
Breast_SE_1030	SLC6A6	0	0.72
Breast_SE_1031	FGD5	0	0.91
Breast_SE_1032	EAF1	0	0.68
Breast_SE_1033	EAF1	0	0.68
Breast_SE_1034	EAF1	0	0.68
Breast_SE_1035	EAF1	0	0.68
Breast_SE_1036	EAF1	0	0.68
Breast_SE_1037	SH3BP5-AS1	0	0.66
Breast_SE_1038	ANKRD28	0	0.69
Breast_SE_104	CCDC28B	0	0.63
Breast_SE_1040	RFTN1	0	0.53
Breast_SE_1041	SATB1	0	0.76
Breast_SE_1042	VENTXP7	0	0.51
Breast_SE_1043	ZNF385D	275759	0.8
Breast_SE_1046	THRB	329093	0.73
Breast_SE_1047	RARB	591006	0.82
Breast_SE_1048	UBE2E1	1761845	0.54
Breast_SE_1049	TOP2B	65242	0.6
Breast_SE_105	TXLNA	0	0.53
Breast_SE_1050	SLC4A7	76325	0.63
Breast_SE_1051	RBMS3	0	0.72
Breast_SE_1052	RBMS3	0	0.85
Breast_SE_1053	RBMS3-AS3	54231	0.69
Breast_SE_1054	RBMS3	395548	0.72
Breast_SE_1055	TGFBR2	0	0.67
Breast_SE_1057	TGFBR2	0	0.8
Breast_SE_106	MARCKSL1	0	0.78
Breast_SE_1060	OSBPL10	215678	0.71
Breast_SE_1061	GPD1L	0	0.85
Breast_SE_1062	CMTM7	0	0.79
Breast_SE_1063	TRIM71	0	0.81
Breast_SE_1064	GPD1L	1874066	0.59
Breast_SE_1065	STAC	266461	0.75
Breast_SE_1067	ITGA9	0	0.78
Breast_SE_1068	CTDSPL	0	0.81
Breast_SE_1069	ACAA1	0	0.53
Breast_SE_107	KIAA1522	0	0.66
Breast_SE_1070	ACAA1	0	0.55
Breast_SE_1071	SCN5A	0	0.97
Breast_SE_1072	ACVR2B-AS1	549208	0.52
Breast_SE_1073	TTC21A	0	0.63
Breast_SE_1074	TRAK1	0	0.71
Breast_SE_1075	VIPR1-AS1	0	0.68
Breast_SE_1076	ZBTB47	0	0.68
Breast_SE_1077	ZBTB47	0	0.82
Breast_SE_1078	VIPR1	272153	0.54
Breast_SE_1079	ZNF852	0	0.62
Breast_SE_108	AZIN2	0	0.5
Breast_SE_1080	MIR138-1	0	0.52
Breast_SE_1081	ANO10	484300	0.79
Breast_SE_1082	MIR138-1	0	0.69
Breast_SE_1083	TMEM158	0	0.79
Breast_SE_1084	MIR564	672015	0.52
Breast_SE_1086	CCR1	0	0.51
Breast_SE_1087	LOC102724297	0	0.82
Breast_SE_1088	LRRC2-AS1	0	0.77
Breast_SE_1089	ALS2CL	0	0.72
Breast_SE_109	TRIM62	0	0.62
Breast_SE_1090	NBEAL2	0	0.66
Breast_SE_1091	SETD2	145405	0.54
Breast_SE_1094	SPINK8	0	0.72
Breast_SE_1095	PLXNB1	0	0.54
Breast_SE_1096	UQCRC1	0	0.65
Breast_SE_1098	P4HTM	0	0.67
Breast_SE_1099	LAMB2	0	0.6
Breast_SE_11	LOC102724552	0	0.7
Breast_SE_110	LOC101929464	0	0.61
Breast_SE_1100	LAMB2	195740	0.6
Breast_SE_1101	NICN1	226494	0.6
Breast_SE_1102	RBM5	0	0.58
Breast_SE_1103	RNF123	194424	0.56
Breast_SE_1104	TUSC2	0	0.65
Breast_SE_1105	CACNA2D2	55224	0.62
Breast_SE_1106	CISH	0	0.73
Breast_SE_1107	RBM15B	0	0.67
Breast_SE_1108	TEX264	0	0.61
Breast_SE_1109	PCBP4	0	0.62
Breast_SE_111	GJB3	0	0.81
Breast_SE_1110	PBRM1	87639	0.52
Breast_SE_1111	PRKCD	0	0.75
Breast_SE_1112	TKT	0	0.72
Breast_SE_1113	WNT5A	0	0.64
Breast_SE_1114	WNT5A	0	0.63
Breast_SE_1115	WNT5A	0	0.88
Breast_SE_1116	ARHGEF3	27646	0.7
Breast_SE_1117	IL17RD	0	0.54
Breast_SE_1118	DENND6A	0	0.69
Breast_SE_112	KIAA0319L	69650	0.65
Breast_SE_1120	DENND6A	315980	0.52
Breast_SE_1121	PXK	0	0.68
Breast_SE_1122	KCTD6	0	0.64
Breast_SE_1124	FLNB	852387	0.61
Breast_SE_1125	PXK	1203439	0.54
Breast_SE_1127	PTPRG	0	0.83
Breast_SE_1129	C3orf14	0	0.7
Breast_SE_113	C1orf216	369192	0.54
Breast_SE_1131	THOC7	12160	0.72
Breast_SE_1132	THOC7	27947	0.73
Breast_SE_1133	THOC7	28693	0.73
Breast_SE_1134	THOC7	28802	0.73
Breast_SE_1135	THOC7	29296	0.73
Breast_SE_1136	ATXN7	46514	0.61
Breast_SE_1137	ATXN7	46535	0.61
Breast_SE_1138	ATXN7	46612	0.6
Breast_SE_1139	ATXN7	46660	0.6
Breast_SE_1140	ATXN7	46687	0.52
Breast_SE_1145	ADAMTS9	168573	0.88
Breast_SE_1147	MAGI1	529349	0.89
Breast_SE_1148	MAGI1	681634	0.85
Breast_SE_1149	MAGI1	681800	0.85
Breast_SE_1150	LRIG1	0	0.68
Breast_SE_1151	SUCLG2-AS1	0	0.71
Breast_SE_1152	EOGT	21121	0.74
Breast_SE_1153	UBA3	0	0.61
Breast_SE_1155	MITF	0	0.62
Breast_SE_1156	MITF	98432	0.5
Breast_SE_1158	FOXP1	8477	0.52
Breast_SE_1159	FOXP1	130506	0.52
Breast_SE_116	FHL3	0	0.79
Breast_SE_1160	EBLN2	0	0.55
Breast_SE_1161	FOXP1	538660	0.69
Breast_SE_1162	LOC101927296	0	0.54
Breast_SE_1163	GPR27	966058	0.57
Breast_SE_1164	PPP4R2	0	0.58
Breast_SE_1165	PDZRN3	3973	0.56
Breast_SE_1166	CNTN3	329749	0.9
Breast_SE_1167	GBE1	233430	0.51
Breast_SE_1169	STX19	0	0.64
Breast_SE_117	MACF1	0	0.57
Breast_SE_1170	STX19	0	0.64
Breast_SE_1171	GPR15	6271	0.58
Breast_SE_1172	ST3GAL6	0	0.88
Breast_SE_1173	DCBLD2	74308	0.82
Breast_SE_1174	DCBLD2	149484	0.69
Breast_SE_1175	COL8A1	0	0.87
Breast_SE_1178	TMEM45A	0	0.72
Breast_SE_118	KIAA0754	0	0.77
Breast_SE_1180	NFKBIZ	0	0.62
Breast_SE_1184	ALCAM	0	0.78
Breast_SE_1185	CBLB	166737	0.68
Breast_SE_1186	MYH15	0	0.5
Breast_SE_1187	LINC00882	88116	0.57
Breast_SE_1188	LINC01215	0	0.55
Breast_SE_119	MYCL	0	0.76
Breast_SE_1190	CD47	45625	0.57
Breast_SE_1191	ZBED2	0	0.63
Breast_SE_1194	CD200	0	0.8
Breast_SE_1195	CCDC80	0	0.84
Breast_SE_1196	BOC	0	0.68
Breast_SE_1197	BOC	0	0.84
Breast_SE_1198	SIDT1	0	0.93
Breast_SE_12	SLC45A1	525645	0.73
Breast_SE_1200	BOC	1149177	0.64
Breast_SE_1201	BOC	1223838	0.62
Breast_SE_1205	ARHGAP31	0	0.84
Breast_SE_1208	FSTL1	21782	0.76
Breast_SE_1209	HGD	0	0.85
Breast_SE_121	COL9A2	3562	0.5
Breast_SE_1210	PARP15	0	0.59
Breast_SE_1211	PARP15	0	0.71
Breast_SE_1212	PARP9	33103	0.55
Breast_SE_1213	PARP14	0	0.54
Breast_SE_1215	ADCY5	100676	0.8
Breast_SE_1216	CCDC14	0	0.64
Breast_SE_1217	ITGB5	0	0.62
Breast_SE_1218	HEG1	18978	0.7
Breast_SE_122	SMAP2	0	0.91
Breast_SE_1220	ZXDC	27337	0.57
Breast_SE_1221	PLXNA1	0	0.56
Breast_SE_1222	GATA2	0	0.55
Breast_SE_1223	MGLL	0	0.73
Breast_SE_1225	GATA2	0	0.59
Breast_SE_1226	GATA2	0	0.86
Breast_SE_1227	CNBP	0	0.51
Breast_SE_123	SCMH1	0	0.61
Breast_SE_1231	PLXND1	0	0.79
Breast_SE_1233	MBD4	400157	0.64
Breast_SE_1235	RAB6B	0	0.59
Breast_SE_1236	TOPBP1	0	0.53
Breast_SE_1237	SLCO2A1	0	0.64
Breast_SE_1238	AMOTL2	0	0.68
Breast_SE_124	CITED4	0	0.65
Breast_SE_1240	KY	49339	0.95
Breast_SE_1241	PCCB	0	0.63
Breast_SE_1242	NCK1	0	0.85
Breast_SE_1243	DZIP1L	0	0.53
Breast_SE_1244	IL20RB	20009	0.76
Breast_SE_1245	DZIP1L	6093	0.9
Breast_SE_1246	MRAS	0	0.62
Breast_SE_1247	CEP70	84642	0.72
Breast_SE_1248	NME9	599398	0.75
Breast_SE_1249	FOXL2NB	0	0.98
Breast_SE_125	FOXO6	0	0.76
Breast_SE_1251	RBP1	1560	0.59
Breast_SE_1252	PXYLP1	39019	0.63
Breast_SE_1253	LOC646730	0	0.63
Breast_SE_1254	ATP1B3	0	0.53
Breast_SE_1258	C3orf58	0	0.63
Breast_SE_1259	PLOD2	47780	0.83
Breast_SE_1260	PLSCR1	25568	0.57
Breast_SE_1261	ZIC1	0	0.89
Breast_SE_1262	GYG1	0	0.51
Breast_SE_1263	HPS3	0	0.57
Breast_SE_1264	HPS3	142137	0.66
Breast_SE_1265	WWTR1	0	0.75
Breast_SE_1266	HPS3	681439	0.6
Breast_SE_1267	HPS3	682459	0.6
Breast_SE_1268	PFN2	0	0.81
Breast_SE_1269	PFN2	4022	0.8
Breast_SE_1270	PFN2	4129	0.8
Breast_SE_1271	ERICH6-AS1	0	0.67
Breast_SE_1272	TSC22D2	0	0.59
Breast_SE_1275	SIAH2	0	0.76
Breast_SE_1277	MBNL1-AS1	0	0.6
Breast_SE_1278	MBNL1	861095	0.59
Breast_SE_1279	PLCH1	222150	0.93
Breast_SE_1281	TIPARP	0	0.71
Breast_SE_1283	RARRES1	0	0.66
Breast_SE_1285	IQCJ-SCHIP1	656188	0.87
Breast_SE_1286	IFT80	138422	0.66
Breast_SE_1287	SPTSSB	0	0.8
Breast_SE_1288	SPTSSB	42055	0.79
Breast_SE_1289	SERPINI1	144838	0.78
Breast_SE_1291	MECOM	0	0.85
Breast_SE_1292	MECOM	522204	0.74
Breast_SE_1294	GPR160	0	0.92
Breast_SE_1295	SKIL	0	0.68
Breast_SE_1296	CLDN11	0	0.83
Breast_SE_1297	EIF5A2	0	0.56
Breast_SE_1299	FNDC3B	0	0.5
Breast_SE_13	GPR157	0	0.58
Breast_SE_1301	FNDC3B	0	0.73
Breast_SE_1305	NAALADL2	0	0.8
Breast_SE_1307	NAALADL2	0	0.66
Breast_SE_1308	NAALADL2-AS3	0	0.84
Breast_SE_1309	GHSR	2663973	0.8
Breast_SE_131	TMEM125	0	0.9
Breast_SE_1312	LINC01208	249409	0.74
Breast_SE_1313	NAALADL2	2043144	0.69
Breast_SE_1314	LINC00501	0	0.67
Breast_SE_1316	LINC00501	124066	0.67
Breast_SE_1317	LINC00501	220551	0.65
Breast_SE_1318	LINC00501	450820	0.54
Breast_SE_132	SZT2	0	0.58
Breast_SE_1320	PEX5L	587221	0.68
Breast_SE_1321	B3GNT5	0	0.59
Breast_SE_1322	B3GNT5	113089	0.53
Breast_SE_1323	KLHL24	0	0.62
Breast_SE_1325	CAMK2N2	0	0.58
Breast_SE_1326	CAMK2N2	0	0.53
Breast_SE_1327	CAMK2N2	0	0.56
Breast_SE_1328	FAM131A	0	0.74
Breast_SE_1329	EPHB3	0	0.92
Breast_SE_133	C1orf210	129365	0.68
Breast_SE_1330	LIPH	0	0.53
Breast_SE_1331	IGF2BP2	2670	0.95
Breast_SE_1333	ETV5	0	0.87
Breast_SE_1334	AHSG	0	0.65
Breast_SE_1336	ST6GAL1	0	0.64
Breast_SE_1337	RTP4	0	0.74
Breast_SE_1338	BCL6	0	0.77
Breast_SE_1339	LPP-AS2	751	0.53
Breast_SE_134	SLC6A9	0	0.71
Breast_SE_1340	TP63	0	0.57
Breast_SE_1341	TPRG1-AS1	0	0.53
Breast_SE_1342	TPRG1-AS2	0	0.77
Breast_SE_1343	TPRG1	94375	0.57
Breast_SE_1344	LPP-AS2	1596732	0.56
Breast_SE_1345	IL1RAP	0	0.63
Breast_SE_1347	IL1RAP	0	0.69
Breast_SE_1348	CCDC50	0	0.67
Breast_SE_135	TCTEX1D4	0	0.82
Breast_SE_1353	HES1	0	0.67
Breast_SE_1354	LINC00887	0	0.58
Breast_SE_1355	LRRC15	113770	0.66
Breast_SE_1356	FAM43A	0	0.61
Breast_SE_1357	FAM43A	325174	0.6
Breast_SE_1359	TM4SF19	0	0.53
Breast_SE_136	KIF2C	0	0.52
Breast_SE_1360	LINC00885	0	0.85
Breast_SE_1361	TM4SF19	11110	0.74
Breast_SE_1362	TCTEX1D2	197736	0.54
Breast_SE_1363	NRROS	0	0.63
Breast_SE_1367	DLG1	234448	0.52
Breast_SE_1370	BDH1	0	0.68
Breast_SE_1373	NCBP2-AS2	987284	0.55
Breast_SE_1374	PCGF3	0	0.57
Breast_SE_1375	CTBP1-AS	0	0.54
Breast_SE_1376	SPON2	0	0.71
Breast_SE_1377	MAEA	0	0.79
Breast_SE_1378	SLBP	0	0.69
Breast_SE_1379	NELFA	0	0.79
Breast_SE_138	PIK3R3	0	0.57
Breast_SE_1380	NAT8L	0	0.7
Breast_SE_1381	MXD4	0	0.55
Breast_SE_1382	ZFYVE28	132469	0.78
Breast_SE_1383	FAM193A	0	0.77
Breast_SE_1384	NAT8L	473624	0.69
Breast_SE_1386	FAM193A	152930	0.65
Breast_SE_1387	DOK7	0	0.72
Breast_SE_1388	RGS12	47713	0.55
Breast_SE_1389	DOK7	0	0.58
Breast_SE_1391	LINC01396	0	0.73
Breast_SE_1392	MSX1	0	0.93
Breast_SE_1393	EVC	0	0.84
Breast_SE_1394	PPP2R2C	0	0.67
Breast_SE_1395	MRFAP1	0	0.69
Breast_SE_1396	PPP2R2C	335509	0.7
Breast_SE_1397	TBC1D14	0	0.79
Breast_SE_1398	SORCS2	0	0.6
Breast_SE_1400	AFAP1	0	0.59
Breast_SE_1401	SH3TC1	0	0.55
Breast_SE_1402	GPR78	0	0.52
Breast_SE_1403	WDR1	0	0.72
Breast_SE_1404	SLC2A9	446434	0.66
Breast_SE_1405	SLC2A9	497479	0.83
Breast_SE_1406	HS3ST1	71195	0.57
Breast_SE_1407	MIR5091	0	0.69
Breast_SE_1408	LINC01182	0	0.58
Breast_SE_1409	LINC01182	0	0.61
Breast_SE_141	PIK3R3	87492	0.67
Breast_SE_1410	LINC01085	0	0.56
Breast_SE_1411	CPEB2	0	0.7
Breast_SE_1412	FGFBP2	0	0.65
Breast_SE_1413	FAM200B	0	0.59
Breast_SE_1414	FGFBP1	0	0.53
Breast_SE_1419	CCDC149	0	0.66
Breast_SE_142	PIK3R3	113973	0.71
Breast_SE_1420	SLC34A2	0	0.71
Breast_SE_1421	RBPJ	0	0.58
Breast_SE_1422	RBPJ	0	0.71
Breast_SE_1424	STIM2	1490098	0.66
Breast_SE_1425	PCDH7	0	0.68
Breast_SE_1426	C4orf19	0	0.8
Breast_SE_1427	TBC1D1	45406	0.64
Breast_SE_1429	KLF3	0	0.71
Breast_SE_143	LRRC41	0	0.62
Breast_SE_1430	KLHL5	0	0.78
Breast_SE_1431	SMIM14	0	0.7
Breast_SE_1432	N4BP2	0	0.7
Breast_SE_1433	RHOH	0	0.55
Breast_SE_1434	RBM47	0	0.93
Breast_SE_1436	APBB2	285040	0.7
Breast_SE_1437	LIMCH1	0	0.87
Breast_SE_1438	LIMCH1	135806	0.73
Breast_SE_1439	GRXCR1	0	0.9
Breast_SE_144	FAAH	353769	0.84
Breast_SE_1440	DCAF4L1	1334101	0.52
Breast_SE_1441	GABRB1	478061	0.66
Breast_SE_1442	TEC	116367	0.71
Breast_SE_1443	SLAIN2	0	0.75
Breast_SE_1447	RASL11B	0	0.63
Breast_SE_1449	CHIC2	38809	0.63
Breast_SE_145	CYP4B1	0	0.73
Breast_SE_1450	PDGFRA	0	0.84
Breast_SE_1452	GSX2	1069211	0.5
Breast_SE_1454	REST	0	0.51
Breast_SE_1455	IGFBP7-AS1	0	0.85
Breast_SE_1457	UGT2B7	0	0.78
Breast_SE_1459	RUFY3	0	0.58
Breast_SE_146	PDZK1IP1	0	0.75
Breast_SE_1461	PPBPP2	0	0.51
Breast_SE_1462	CXCL8	0	0.57
Breast_SE_1463	PF4	0	0.59
Breast_SE_1464	MTHFD2L	0	0.58
Breast_SE_1466	AREG	0	0.73
Breast_SE_1467	PF4	547260	0.64
Breast_SE_1468	AREG	162854	0.59
Breast_SE_1469	FAM47E	0	0.67
Breast_SE_147	CYP4A22	70947	0.72
Breast_SE_1470	SHROOM3	0	0.66
Breast_SE_1472	CCNG2	0	0.66
Breast_SE_1473	CNOT6L	85790	0.79
Breast_SE_1474	ANXA3	0	0.72
Breast_SE_1475	ANTXR2	103979	0.68
Breast_SE_1476	HNRNPD	75290	0.53
Breast_SE_1477	HNRNPD	75414	0.53
Breast_SE_1478	HNRNPD	75470	0.53
Breast_SE_1479	TMEM150C	8718	0.87
Breast_SE_1481	PLAC8	0	0.68
Breast_SE_1483	PLAC8	761497	0.63
Breast_SE_1484	LOC101929064	0	0.6
Breast_SE_1486	AFF1	0	0.66
Breast_SE_1487	SPARCL1	3651	0.76
Breast_SE_1488	HERC3	0	0.78
Breast_SE_1490	PDLIM5	0	0.57
Breast_SE_1491	PDLIM5	33062	0.6
Breast_SE_1492	BMPR1B	0	0.91
Breast_SE_1493	BMPR1B	233280	0.93
Breast_SE_1494	UNC5C	371071	0.86
Breast_SE_1495	PCNAP1	0	0.56
Breast_SE_1496	PCNAP1	0	0.63
Breast_SE_1497	LOC100507053	0	0.51
Breast_SE_1498	TSPAN5	68969	0.83
Breast_SE_15	GPR157	574824	0.54
Breast_SE_150	FOXE3	259237	0.97
Breast_SE_1502	PPP3CA	314576	0.77
Breast_SE_1507	ARHGEF38	0	0.73
Breast_SE_1509	PAPSS1	74201	0.8
Breast_SE_151	TRABD2B	226290	0.74
Breast_SE_1510	LEF1-AS1	0	0.81
Breast_SE_1511	ELOVL6	35639	0.63
Breast_SE_1512	CAMK2D	304499	0.79
Breast_SE_1513	ARSJ	43337	0.67
Breast_SE_1516	SEC24D	16339	0.59
Breast_SE_1518	FABP2	891903	0.89
Breast_SE_1519	BBS7	0	0.65
Breast_SE_152	CDKN2C	0	0.81
Breast_SE_1521	FGF2	0	0.61
Breast_SE_1522	NUDT6	0	0.8
Breast_SE_1523	SPRY1	0	0.85
Breast_SE_1524	FAT4	0	0.58
Breast_SE_1525	LINC01091	451594	0.62
Breast_SE_1526	IL21-AS1	1552010	0.72
Breast_SE_1527	MFSD8	0	0.53
Breast_SE_1529	JADE1	0	0.66
Breast_SE_153	TTC39A-AS1	0	0.72
Breast_SE_1530	JADE1	0	0.75
Breast_SE_1531	PCDH10	0	0.87
Breast_SE_1532	SLC7A11	57149	0.62
Breast_SE_1533	NDUFC1	0	0.8
Breast_SE_1534	ELF2	110025	0.78
Breast_SE_1535	ELF2	439651	0.74
Breast_SE_1536	ELF2	497577	0.75
Breast_SE_1537	ELF2	497669	0.75
Breast_SE_1538	MAML3	413828	0.8
Breast_SE_1539	MAML3	502890	0.88
Breast_SE_1540	TBC1D9	6338	0.85
Breast_SE_1542	MGAT4D	2014547	0.64
Breast_SE_1544	TBC1D9	1974405	0.62
Breast_SE_1545	GAB1	0	0.88
Breast_SE_1546	SMAD1	0	0.77
Breast_SE_1547	ZNF827	0	0.78
Breast_SE_1548	ZNF827	146841	0.71
Breast_SE_1549	ARHGAP10	0	0.78
Breast_SE_155	RAB3B	0	0.54
Breast_SE_1550	NR3C2	74582	0.6
Breast_SE_1551	DCLK2	129235	0.71
Breast_SE_1552	LRBA	745820	0.66
Breast_SE_1555	TMEM154	6526	0.69
Breast_SE_1556	FHDC1	0	0.88
Breast_SE_1558	TRIM2	0	0.66
Breast_SE_1559	FHDC1	522160	0.65
Breast_SE_1560	TLR2	0	0.67
Breast_SE_1562	LRAT	0	0.86
Breast_SE_1563	GUCY1A3	0	0.94
Breast_SE_1564	PDGFC	0	0.54
Breast_SE_1565	PDGFC	160758	0.76
Breast_SE_1567	CTSO	2067875	0.7
Breast_SE_1568	FAM198B	0	0.67
Breast_SE_1569	RXFP1	0	0.71
Breast_SE_1570	C4orf45	0	0.56
Breast_SE_1571	PDGFC	2639933	0.5
Breast_SE_1572	MIR4454	0	0.77
Breast_SE_1573	NPY1R	0	0.93
Breast_SE_1574	KLHL2	0	0.62
Breast_SE_1575	TLL1	89395	0.74
Breast_SE_1576	DDX60L	118041	0.64
Breast_SE_1577	PALLD	8554	0.74
Breast_SE_1578	CBR4	10554	0.59
Breast_SE_1579	SH3RF1	125354	0.74
Breast_SE_158	ECHDC2	7676	0.66
Breast_SE_1581	MFAP3L	0	0.52
Breast_SE_1582	MFAP3L	0	0.53
Breast_SE_1583	GALNT7	0	0.55
Breast_SE_1584	HAND2	0	0.87
Breast_SE_1585	NEIL3	0	0.58
Breast_SE_1586	VEGFC	83798	0.9
Breast_SE_1587	VEGFC	194290	0.56
Breast_SE_1588	VEGFC	294760	0.6
Breast_SE_1589	TENM3	0	0.5
Breast_SE_159	C1orf123	0	0.6
Breast_SE_1590	WWC2	0	0.89
Breast_SE_1591	TRAPPC11	0	0.65
Breast_SE_1592	ING2	0	0.56
Breast_SE_1593	ING2	749819	0.52
Breast_SE_1594	ACSL1	27408	0.84
Breast_SE_1595	ANKRD37	0	0.56
Breast_SE_1596	SORBS2	176024	0.73
Breast_SE_1597	UFSP2	494952	0.52
Breast_SE_1598	F11	0	0.79
Breast_SE_1599	FAT1	27076	0.77
Breast_SE_160	LRP8	28132	0.67
Breast_SE_1601	DBET	0	0.53
Breast_SE_1602	LINC01060	0	0.8
Breast_SE_1604	PLEKHG4B	0	0.81
Breast_SE_1607	EXOC3	0	0.71
Breast_SE_1608	AHRR	0	0.7
Breast_SE_1609	EXOC3	421913	0.66
Breast_SE_161	SLC1A7	507060	0.58
Breast_SE_1610	NKD2	0	0.73
Breast_SE_1611	SLC12A7	0	0.86
Breast_SE_1613	LPCAT1	8474	0.6
Breast_SE_1614	MRPL36	0	0.65
Breast_SE_1615	IRX4	0	0.93
Breast_SE_1616	IRX4	40734	0.71
Breast_SE_1617	C5orf38	0	0.68
Breast_SE_1618	IRX2	0	0.86
Breast_SE_162	GLIS1	219057	0.97
Breast_SE_1620	IRX1	0	0.96
Breast_SE_1621	LINC01020	0	0.72
Breast_SE_1622	ADAMTS16	77858	0.51
Breast_SE_1623	ICE1	1209179	0.56
Breast_SE_1624	ICE1	1277226	0.72
Breast_SE_1625	ADCY2	471750	0.54
Breast_SE_1627	SNORD123	0	0.51
Breast_SE_1628	SEMA5A	505151	0.83
Breast_SE_1629	SEMA5A	509181	0.84
Breast_SE_163	SSBP3	0	0.8
Breast_SE_1630	C5orf49	2415862	0.5
Breast_SE_1631	FASTKD3	2492254	0.73
Breast_SE_1632	CMBL	134913	0.63
Breast_SE_1633	ANKRD33B	0	0.84
Breast_SE_1634	MTRR	2809558	0.65
Breast_SE_1636	DNAH5	339870	0.66
Breast_SE_1637	TRIO	0	0.62
Breast_SE_1638	TRIO	0	0.77
Breast_SE_1639	DNAH5	968808	0.59
Breast_SE_164	SSBP3	231595	0.61
Breast_SE_1640	ANKH	0	0.72
Breast_SE_1643	LINC01194	4270502	0.55
Breast_SE_1644	BASP1	0	0.94
Breast_SE_1645	LOC285696	5515882	0.83
Breast_SE_1646	GOLPH3	19042	0.71
Breast_SE_1647	MTMR12	0	0.67
Breast_SE_1648	MTMR12	201428	0.53
Breast_SE_1649	RXFP3	0	0.55
Breast_SE_1650	NPR3	0	0.6
Breast_SE_1651	NPR3	0	0.82
Breast_SE_1652	ADAMTS12	0	0.52
Breast_SE_1653	ADAMTS12	160363	0.82
Breast_SE_1654	TTC23L	0	0.56
Breast_SE_1655	RAI14	0	0.87
Breast_SE_1656	C1QTNF3-AMACR	917343	0.64
Breast_SE_1657	PRLR	3811	0.9
Breast_SE_1658	UGT3A2	0	0.83
Breast_SE_1659	NADK2	47515	0.8
Breast_SE_166	USP24	123502	0.54
Breast_SE_1660	SLC1A3	0	0.61
Breast_SE_1661	SLC1A3	27633	0.65
Breast_SE_1662	WDR70	0	0.67
Breast_SE_1663	GDNF	21580	0.95
Breast_SE_1664	LIFR	0	0.77
Breast_SE_1665	OSMR	0	0.84
Breast_SE_1667	LINC00603	0	0.57
Breast_SE_1668	DAB2	2030	0.69
Breast_SE_1670	OXCT1-AS1	0	0.63
Breast_SE_1671	CCDC152	0	0.86
Breast_SE_1672	CCDC152	49749	0.83
Breast_SE_1674	LOC100506639	0	0.68
Breast_SE_1676	ZNF131	434966	0.64
Breast_SE_1677	MRPS30	0	0.7
Breast_SE_1679	ITGA2	0	0.64
Breast_SE_1680	GZMK	0	0.71
Breast_SE_1681	FST	0	0.53
Breast_SE_1682	SNX18	0	0.57
Breast_SE_1683	CCNO	0	0.79
Breast_SE_1684	DHX29	234382	0.58
Breast_SE_1685	FLJ31104	0	0.69
Breast_SE_1686	MAP3K1	0	0.81
Breast_SE_1687	MAP3K1	0	0.86
Breast_SE_1689	LINCR-0003	0	0.57
Breast_SE_169	MROH7	1547848	0.68
Breast_SE_1690	ACTBL2	0	0.62
Breast_SE_1693	MAP3K1	1245828	0.6
Breast_SE_1695	PLK2	0	0.52
Breast_SE_1698	PART1	0	0.9
Breast_SE_1699	ZSWIM6	0	0.7
Breast_SE_170	MROH7	1721268	0.57
Breast_SE_1702	HTR1A	1059637	0.6
Breast_SE_1703	ADAMTS6	6022	0.83
Breast_SE_1706	MAST4	390754	0.76
Breast_SE_1708	MAST4	1281615	0.59
Breast_SE_1709	PIK3R1	0	0.78
Breast_SE_1710	MARVELD2	0	0.51
Breast_SE_1712	OCLN	0	0.78
Breast_SE_1713	MAP1B	0	0.86
Breast_SE_1714	MAP1B	199722	0.53
Breast_SE_1715	MAP1B	489938	0.63
Breast_SE_1716	MAP1B	1256015	0.59
Breast_SE_1717	FOXD1	0	0.78
Breast_SE_1718	ARHGEF28	0	0.51
Breast_SE_1719	GCNT4	0	0.5
Breast_SE_172	C1orf87	0	0.7
Breast_SE_1723	GCNT4	9362	0.74
Breast_SE_1724	HMGCR	0	0.53
Breast_SE_1725	IQGAP2	0	0.69
Breast_SE_1726	F2R	0	0.83
Breast_SE_1727	F2RL1	0	0.57
Breast_SE_1728	PDE8B	0	0.62
Breast_SE_1729	LHFPL2	0	0.78
Breast_SE_173	TACSTD2	0	0.82
Breast_SE_1731	ZFYVE16	0	0.74
Breast_SE_1732	ZFYVE16	56384	0.58
Breast_SE_1733	SSBP2	335920	0.8
Breast_SE_1734	SSBP2	408736	0.68
Breast_SE_1735	VCAN	0	0.75
Breast_SE_1736	HAPLN1	74413	0.77
Breast_SE_1737	EDIL3	414859	0.91
Breast_SE_1738	RASA1	0	0.57
Breast_SE_174	MYSM1	22143	0.55
Breast_SE_1741	MEF2C	141651	0.86
Breast_SE_1746	NR2F1-AS1	154222	0.8
Breast_SE_1747	RHOBTB3	0	0.91
Breast_SE_1748	GLRX	0	0.56
Breast_SE_1749	ELL2	121558	0.56
Breast_SE_1750	ELL2	287344	0.59
Breast_SE_1751	CAST	0	0.75
Breast_SE_1752	LNPEP	0	0.65
Breast_SE_1754	RGMB-AS1	0	0.59
Breast_SE_1756	PAM	0	0.66
Breast_SE_1757	PAM	98194	0.54
Breast_SE_1758	C5orf30	0	0.81
Breast_SE_1761	EFNA5	124377	0.63
Breast_SE_1762	EFNA5	269064	0.84
Breast_SE_1763	FBXL17	521262	0.5
Breast_SE_1764	FBXL17	521351	0.5
Breast_SE_1765	FBXL17	521428	0.5
Breast_SE_1766	FBXL17	521544	0.5
Breast_SE_1768	LOC101927023	632202	0.64
Breast_SE_1771	LOX	0	0.87
Breast_SE_1772	ZNF608	0	0.78
Breast_SE_1774	ALDH7A1	0	0.52
Breast_SE_1776	PRDM6	2566173	0.76
Breast_SE_1778	PHAX	147447	0.7
Breast_SE_1779	ISOC1	19437	0.61
Breast_SE_178	NFIA	0	0.84
Breast_SE_1780	KIAA1024L	0	1
Breast_SE_1781	KIAA1024L	0	0.99
Breast_SE_1783	CDC42SE2	0	0.63
Breast_SE_1785	SLC22A4	0	0.6
Breast_SE_1786	PDLIM4	0	0.66
Breast_SE_1787	C5orf56	0	0.65
Breast_SE_1789	RAD50	659271	0.54
Breast_SE_1790	TCF7	0	0.53
Breast_SE_1794	VDAC1	460779	0.51
Breast_SE_1795	JADE2	0	0.62
Breast_SE_1797	PITX1	0	0.83
Breast_SE_1800	CXCL14	0	0.52
Breast_SE_1801	TGFBI	0	0.79
Breast_SE_1809	BRD8	347418	0.61
Breast_SE_181	KANK4	38044	0.73
Breast_SE_1814	PROB1	0	0.64
Breast_SE_1815	CXXC5	0	0.92
Breast_SE_1817	CYSTM1	0	0.67
Breast_SE_1818	HBEGF	0	0.54
Breast_SE_1819	HBEGF	0	0.66
Breast_SE_182	USP1	0	0.7
Breast_SE_1820	DND1	0	0.62
Breast_SE_1821	DND1	0	0.63
Breast_SE_1822	LOC101926905	37534	0.92
Breast_SE_1823	LOC101926905	125779	0.81
Breast_SE_1824	PCDHGB2	105681	0.62
Breast_SE_1825	PCDH1	0	0.71
Breast_SE_1827	SPRY4	0	0.73
Breast_SE_1828	SPRY4	108945	0.53
Breast_SE_1829	SPRY4	154519	0.53
Breast_SE_183	PGM1	50181	0.66
Breast_SE_1830	FGF1	0	0.63
Breast_SE_1831	ARHGAP26	0	0.71
Breast_SE_1832	YIPF5	0	0.7
Breast_SE_1834	NR3C1	90389	0.88
Breast_SE_1835	SH3RF2	0	0.61
Breast_SE_1836	DPYSL3	0	0.69
Breast_SE_1837	SPINK6	0	0.92
Breast_SE_1839	ABLIM3	0	0.64
Breast_SE_184	ROR1	263660	0.58
Breast_SE_1840	PCYOX1L	0	0.58
Breast_SE_1841	PPARGC1B	0	0.54
Breast_SE_1842	SLC26A2	0	0.77
Breast_SE_1843	HMGXB3	0	0.56
Breast_SE_1844	PDGFRB	0	0.69
Breast_SE_1845	ARSI	0	0.57
Breast_SE_1846	NDST1	0	0.77
Breast_SE_1847	SYNPO	0	0.81
Breast_SE_1848	SMIM3	0	0.74
Breast_SE_185	CACHD1	0	0.63
Breast_SE_1850	SLC36A2	0	0.56
Breast_SE_1851	SLC36A3	0	0.58
Breast_SE_1852	SPARC	0	0.7
Breast_SE_1853	GALNT10	0	0.72
Breast_SE_1854	LARP1	0	0.63
Breast_SE_1855	ADAM19	1524	0.84
Breast_SE_1856	FAM71B	850406	0.92
Breast_SE_1857	EBF1	0	0.93
Breast_SE_1858	RNF145	0	0.74
Breast_SE_1859	LOC285626	541759	0.74
Breast_SE_1860	PTTG1	0	0.71
Breast_SE_1861	CCNJL	0	0.82
Breast_SE_1862	MAT2B	0	0.51
Breast_SE_1863	TENM2	399801	0.74
Breast_SE_1864	WWC1	0	0.86
Breast_SE_1865	SLIT3	478796	0.75
Breast_SE_1866	SPDL1	107106	0.74
Breast_SE_1867	FAM196B	82631	0.51
Breast_SE_1868	FOXI1	0	0.67
Breast_SE_1869	C5orf58	0	0.94
Breast_SE_187	LEPR	0	0.53
Breast_SE_1870	GABRP	0	0.65
Breast_SE_1871	TLX3	0	0.9
Breast_SE_1872	FGF18	0	0.65
Breast_SE_1873	FBXW11	112574	0.62
Breast_SE_1874	STK10	54377	0.74
Breast_SE_1875	SH3PXD2B	13115	0.69
Breast_SE_188	PDE4B	437485	0.71
Breast_SE_1880	MSX2	0	0.76
Breast_SE_1881	MSX2	0	0.88
Breast_SE_1884	UNC5A	0	0.64
Breast_SE_1885	UNC5A	0	0.95
Breast_SE_1886	MXD3	0	0.52
Breast_SE_1887	FGFR4	0	0.87
Breast_SE_1888	MXD3	0	0.65
Breast_SE_1889	RAB24	0	0.59
Breast_SE_189	LEPR	1111683	0.66
Breast_SE_1890	RMND5B	0	0.8
Breast_SE_1891	RMND5B	65741	0.66
Breast_SE_1892	AACSP1	0	0.82
Breast_SE_1893	ZNF354C	0	0.63
Breast_SE_1894	ADAMTS2	72231	0.89
Breast_SE_1895	RUFY1	35600	0.63
Breast_SE_1896	RUFY1	124052	0.69
Breast_SE_1897	GFPT2	0	0.73
Breast_SE_1898	CNOT6	0	0.68
Breast_SE_19	CASZ1	0	0.71
Breast_SE_190	WDR78	100856	0.51
Breast_SE_1900	CTC-338M12.4	0	0.52
Breast_SE_1901	EXOC2	0	0.5
Breast_SE_1902	FOXQ1	0	0.81
Breast_SE_1904	FOXC1	0	0.88
Breast_SE_1905	FOXCUT	143216	0.8
Breast_SE_1906	FOXCUT	493695	0.67
Breast_SE_1907	GMDS-AS1	0	0.67
Breast_SE_1908	SERPINB9P1	0	0.53
Breast_SE_1909	SERPINB9	0	0.59
Breast_SE_191	GADD45A	0	0.68
Breast_SE_1910	SERPINB1	0	0.64
Breast_SE_1911	NQO2	0	0.66
Breast_SE_1912	TUBB2A	73275	0.72
Breast_SE_1913	LOC643327	0	0.77
Breast_SE_1914	LOC643327	43024	0.76
Breast_SE_1915	PXDC1	0	0.78
Breast_SE_1917	BPHL	871101	0.53
Breast_SE_1919	PXDC1	613848	0.52
Breast_SE_192	GNG12-AS1	340829	0.66
Breast_SE_1921	PPP1R3G	0	0.73
Breast_SE_1922	NRN1	0	0.92
Breast_SE_1924	RREB1	0	0.56
Breast_SE_1925	RREB1	0	0.72
Breast_SE_1927	DSP	0	0.87
Breast_SE_193	RPE65	0	0.57
Breast_SE_1931	TFAP2A	0	0.83
Breast_SE_1932	GCNT2	0	0.71
Breast_SE_1933	GCM2	0	0.53
Breast_SE_1934	NEDD9	0	0.62
Breast_SE_1935	EDN1	0	0.56
Breast_SE_1936	TMEM14C	1030563	0.6
Breast_SE_1937	HIVEP1	0	0.81
Breast_SE_1938	LOC100130357	0	0.52
Breast_SE_194	NEGR1	874111	0.83
Breast_SE_1942	ELOVL2-AS1	1733884	0.95
Breast_SE_1943	GFOD1	0	0.7
Breast_SE_1944	RANBP9	86465	0.74
Breast_SE_1945	GMPR	0	0.58
Breast_SE_1946	MIR4639	0	0.5
Breast_SE_1947	JARID2	0	0.61
Breast_SE_1948	MYLIP	0	0.88
Breast_SE_1949	GMPR	0	0.57
Breast_SE_195	LHX8	2649	0.91
Breast_SE_1950	ATXN1	368204	0.71
Breast_SE_1951	STMND1	0	0.55
Breast_SE_1952	RBM24	0	0.87
Breast_SE_1953	RBM24	0	0.86
Breast_SE_1954	LOC101928433	623547	0.63
Breast_SE_1955	LOC101928519	0	0.72
Breast_SE_1956	NUP153	84532	0.56
Breast_SE_1957	KIF13A	163635	0.84
Breast_SE_1958	DEK	0	0.69
Breast_SE_1959	RNF144B	0	0.75
Breast_SE_196	ST6GALNAC5	0	0.94
Breast_SE_1960	ID4	0	0.85
Breast_SE_1961	MBOAT1	17207	0.62
Breast_SE_1962	LINC00581	0	0.55
Breast_SE_1963	LINC00581	0	0.55
Breast_SE_1964	CDKAL1	142963	0.86
Breast_SE_1965	CDKAL1	965275	0.84
Breast_SE_1966	SOX4	0	0.84
Breast_SE_1967	CASC15	188949	0.76
Breast_SE_1968	GPLD1	0	0.74
Breast_SE_1969	KAAG1	0	0.69
Breast_SE_197	ST6GALNAC5	121567	0.79
Breast_SE_1970	C6orf62	2583	0.51
Breast_SE_1971	C6orf229	184062	0.59
Breast_SE_1972	CMAHP	31244	0.78
Breast_SE_1974	HCG11	0	0.55
Breast_SE_1976	HIST1H3H	0	0.84
Breast_SE_198	AK5	207230	0.66
Breast_SE_1980	ZFP57	0	0.6
Breast_SE_1981	IFITM4P	173464	0.73
Breast_SE_1982	TRIM31	0	0.6
Breast_SE_1983	HCG18	32896	0.51
Breast_SE_1984	MDC1	0	0.54
Breast_SE_1985	POU5F1	0	0.53
Breast_SE_199	ST6GALNAC5	812990	0.55
Breast_SE_1990	PSMB9	0	0.72
Breast_SE_1992	MIR6834	0	0.64
Breast_SE_1993	ZBTB22	0	0.56
Breast_SE_1994	SYNGAP1	0	0.52
Breast_SE_1997	HMGA1	0	0.77
Breast_SE_1998	UHRF1BP1	0	0.69
Breast_SE_1999	SPDEF	0	0.93
Breast_SE_20	RNU6-2	589319	0.59
Breast_SE_200	NEXN-AS1	0	0.75
Breast_SE_2002	TEAD3	0	0.82
Breast_SE_2003	DEF6	285052	0.58
Breast_SE_2004	FKBP5	89085	0.68
Breast_SE_2005	CLPSL1	0	0.72
Breast_SE_2006	MAPK13	0	0.83
Breast_SE_2007	STK38	0	0.69
Breast_SE_2008	STK38	38726	0.61
Breast_SE_2010	STK38	410862	0.59
Breast_SE_2011	TMEM217	26236	0.59
Breast_SE_2012	FGD2	297037	0.77
Breast_SE_2014	ZFAND3	0	0.7
Breast_SE_2015	TBC1D22B	560142	0.73
Breast_SE_2017	KCNK5	0	0.76
Breast_SE_2018	MOCS1	0	0.59
Breast_SE_2019	LOC101929555	51816	0.76
Breast_SE_2020	LOC101929555	106386	0.94
Breast_SE_2021	LOC101929555	116963	0.94
Breast_SE_2022	UNC5CL	0	0.59
Breast_SE_2023	FOXP4	0	0.75
Breast_SE_2024	TFEB	0	0.62
Breast_SE_2026	C6orf132	0	0.76
Breast_SE_2028	CNPY3	0	0.56
Breast_SE_2029	PEX6	0	0.63
Breast_SE_2030	KLHDC3	0	0.58
Breast_SE_2031	KLHDC3	0	0.58
Breast_SE_2032	KLHDC3	0	0.71
Breast_SE_2033	C6orf226	0	0.57
Breast_SE_2034	PPP2R5D	0	0.62
Breast_SE_2035	CUL9	0	0.67
Breast_SE_2036	SRF	0	0.79
Breast_SE_2037	POLH	0	0.64
Breast_SE_2040	C6orf223	0	0.59
Breast_SE_2042	RUNX2	0	0.53
Breast_SE_2043	RUNX2	83525	0.91
Breast_SE_2045	LOC101926962	10435	0.53
Breast_SE_2046	SLC25A27	301946	0.51
Breast_SE_2047	CD2AP	0	0.71
Breast_SE_2049	C6orf141	0	0.63
Breast_SE_205	SYDE2	31863	0.9
Breast_SE_2050	TFAP2B	0	0.82
Breast_SE_2051	TFAP2B	634852	0.51
Breast_SE_2052	TRAM2	0	0.79
Breast_SE_2053	ICK	34214	0.71
Breast_SE_2054	ELOVL5	0	0.8
Breast_SE_2056	GCLC	84211	0.51
Breast_SE_2057	LRRC1	0	0.85
Breast_SE_2058	LOC101927189	0	0.79
Breast_SE_2059	FAM83B	0	0.76
Breast_SE_206	CTBS	704352	0.73
Breast_SE_2060	MIR548U	0	0.62
Breast_SE_2061	LOC101930010	0	0.57
Breast_SE_2062	DST	167708	0.71
Breast_SE_2063	BAG2	0	0.7
Breast_SE_2064	LGSN	0	0.52
Breast_SE_2065	LGSN	0	0.55
Breast_SE_2066	MIR548U	6096843	0.53
Breast_SE_2067	PHF3	0	0.65
Breast_SE_2068	EYS	953639	0.82
Breast_SE_2069	LINC00472	0	0.65
Breast_SE_207	DDAH1	108160	0.79
Breast_SE_2070	LINC00472	52986	0.6
Breast_SE_2072	KCNQ5	0	0.66
Breast_SE_2073	MIR30A	1626449	0.5
Breast_SE_2075	MB21D1	17279	0.73
Breast_SE_2078	CD109	0	0.84
Breast_SE_2079	LOC101928516	389380	0.99
Breast_SE_208	CYR61	0	0.69
Breast_SE_2082	COL12A1	102923	0.85
Breast_SE_2084	SENP6	0	0.58
Breast_SE_2085	SENP6	0	0.58
Breast_SE_2086	MYO6	0	0.92
Breast_SE_2088	FAM46A	0	0.76
Breast_SE_209	C1orf52	1452928	0.69
Breast_SE_2090	TPBG	0	0.72
Breast_SE_2091	TPBG	21855	0.63
Breast_SE_2093	TBX18	20466	0.92
Breast_SE_2094	NT5E	0	0.63
Breast_SE_2095	SYNCRIP	22019	0.58
Breast_SE_2096	CEP162	1517443	0.76
Breast_SE_2099	PNRC1	0	0.62
Breast_SE_21	CORT	595525	0.65
Breast_SE_210	LMO4	0	0.77
Breast_SE_2100	PM20D2	0	0.94
Breast_SE_2103	SIM1	58250	0.79
Breast_SE_2105	HACE1	130316	0.61
Breast_SE_2106	POPDC3	15510	0.91
Breast_SE_2107	PREP	31807	0.65
Breast_SE_2108	PREP	124053	0.77
Breast_SE_211	LINC01364	427941	0.59
Breast_SE_2110	BVES	638902	0.53
Breast_SE_2111	BVES	870497	0.62
Breast_SE_2114	CD24	0	0.52
Breast_SE_2115	RTN4IP1	0	0.85
Breast_SE_2119	CD24	0	0.56
Breast_SE_212	GBP2	0	0.54
Breast_SE_2120	CD24	0	0.9
Breast_SE_2121	C6orf203	0	0.71
Breast_SE_2122	BEND3	46580	0.66
Breast_SE_2126	ARMC2	0	0.53
Breast_SE_2127	FOXO3	0	0.61
Breast_SE_2128	SESN1	15853	0.69
Breast_SE_213	LRRC8C	0	0.75
Breast_SE_2130	AK9	0	0.76
Breast_SE_2131	ZBTB24	0	0.5
Breast_SE_2132	AK9	364565	0.8
Breast_SE_2133	WASF1	78755	0.72
Breast_SE_2134	METTL24	80307	0.72
Breast_SE_2136	CDK19	203708	0.7
Breast_SE_2137	CDK19	242383	0.72
Breast_SE_2138	METTL24	1010522	0.51
Breast_SE_2139	CDC40	1282503	0.72
Breast_SE_2142	LAMA4	66712	0.68
Breast_SE_2145	MARCKS	0	0.58
Breast_SE_2146	MARCKS	0	0.83
Breast_SE_2148	DSE	97649	0.84
Breast_SE_2149	DCBLD1	0	0.68
Breast_SE_215	ZNF326	0	0.72
Breast_SE_2150	DCBLD1	0	0.62
Breast_SE_2151	ASF1A	0	0.53
Breast_SE_2152	RNF217	0	0.79
Breast_SE_2153	RNF217-AS1	179539	0.64
Breast_SE_2154	TPD52L1	0	0.85
Breast_SE_2155	NKAIN2	1611376	0.95
Breast_SE_2158	RNF146	0	0.72
Breast_SE_2159	RNF146	0	0.72
Breast_SE_216	PKN2	1197460	0.54
Breast_SE_2160	ECHDC1	48612	0.79
Breast_SE_2162	PTPRK	596439	0.63
Breast_SE_2163	SOGA3	2048527	0.58
Breast_SE_2164	ARHGAP18	63263	0.76
Breast_SE_2166	CTGF	165363	0.53
Breast_SE_2168	SGK1	0	0.86
Breast_SE_217	HFM1	0	0.6
Breast_SE_2170	LOC101928231	180530	0.75
Breast_SE_2171	MYB	22494	0.82
Breast_SE_2173	MAP3K5	180582	0.72
Breast_SE_2174	IL20RA	0	0.79
Breast_SE_2175	IL22RA2	1981	0.62
Breast_SE_2176	TNFAIP3	0	0.5
Breast_SE_2177	PERP	0	0.72
Breast_SE_2178	PERP	0	0.7
Breast_SE_2179	HEBP2	0	0.61
Breast_SE_218	TGFBR3	0	0.68
Breast_SE_2180	NHSL1	198287	0.76
Breast_SE_2181	HEBP2	409731	0.63
Breast_SE_2182	CITED2	0	0.51
Breast_SE_2183	CITED2	194449	0.57
Breast_SE_2185	CITED2	665705	0.51
Breast_SE_2187	HIVEP2	150273	0.69
Breast_SE_2189	AIG1	334013	0.53
Breast_SE_219	TGFBR3	0	0.63
Breast_SE_2190	UTRN	0	0.71
Breast_SE_2191	STXBP5	0	0.81
Breast_SE_2192	SASH1	0	0.75
Breast_SE_2194	TAB2	97632	0.55
Breast_SE_2195	TAB2	98264	0.53
Breast_SE_2197	RAET1E	608	0.69
Breast_SE_2198	PPP1R14C	0	0.76
Breast_SE_2199	PLEKHG1	56913	0.72
Breast_SE_220	TGFBR3	0	0.76
Breast_SE_2200	MTHFD1L	0	0.59
Breast_SE_2201	AKAP12	0	0.51
Breast_SE_2202	RMND1	0	0.68
Breast_SE_2203	CCDC170	0	0.95
Breast_SE_2204	CCDC170	108598	0.85
Breast_SE_2205	ESR1	106392	0.93
Breast_SE_2206	ESR1	208388	0.62
Breast_SE_2208	CNKSR3	28239	0.84
Breast_SE_2209	TIAM2	0	0.78
Breast_SE_2211	TULP4	0	0.52
Breast_SE_2213	SYNJ2	0	0.6
Breast_SE_2214	TAGAP	0	0.81
Breast_SE_2215	OSTCP1	0	0.61
Breast_SE_2216	LOC101929122	0	0.64
Breast_SE_2217	EZR-AS1	0	0.57
Breast_SE_2218	TAGAP	0	0.84
Breast_SE_222	LOC100129046	0	0.68
Breast_SE_2220	SOD2	0	0.65
Breast_SE_2223	AIRN	373886	0.54
Breast_SE_2225	AGPAT4	263038	0.54
Breast_SE_2226	SLC22A2	1259526	0.81
Breast_SE_2227	QKI	0	0.63
Breast_SE_2228	LINC00602	0	0.67
Breast_SE_2229	LINC00473	59160	0.72
Breast_SE_223	SLC44A3	0	0.57
Breast_SE_2230	RPS6KA2	147966	0.58
Breast_SE_2231	RPS6KA2	179319	0.7
Breast_SE_2232	RNASET2	4069	0.62
Breast_SE_2233	UNC93A	0	0.88
Breast_SE_2235	SMOC2	0	0.56
Breast_SE_2237	TCP10	548782	0.83
Breast_SE_2238	KIF25	0	0.5
Breast_SE_2239	SMOC2	0	0.73
Breast_SE_224	ARHGAP29	648	0.77
Breast_SE_2240	SMOC2	0	0.74
Breast_SE_2241	SMOC2	64712	0.82
Breast_SE_2242	LOC101929460	28213	0.75
Breast_SE_2244	PHF10	0	0.64
Breast_SE_2245	LOC100131532	151834	0.56
Breast_SE_2246	DLL1	5253	0.64
Breast_SE_2249	PDGFA	0	0.61
Breast_SE_225	F3	0	0.75
Breast_SE_2250	PDGFA	0	0.8
Breast_SE_2251	GET4	0	0.71
Breast_SE_2252	ZFAND2A	250889	0.52
Breast_SE_2253	ELFN1	0	0.83
Breast_SE_2254	CHST12	0	0.53
Breast_SE_2255	PSMG3	641654	0.59
Breast_SE_2259	SLC29A4	0	0.56
Breast_SE_226	CNN3	0	0.83
Breast_SE_2260	RNF216	0	0.68
Breast_SE_2262	CYTH3	81045	0.65
Breast_SE_2263	PMS2CL	0	0.54
Breast_SE_2264	USP42	501992	0.91
Breast_SE_2266	ICA1	0	0.71
Breast_SE_2267	GLCCI1	0	0.83
Breast_SE_2268	ICA1	125722	0.94
Breast_SE_2269	ARL4A	0	0.52
Breast_SE_227	DPYD	0	0.56
Breast_SE_2270	AGMO	0	0.87
Breast_SE_2271	ISPD-AS1	0	0.71
Breast_SE_2272	ISPD	83405	0.74
Breast_SE_2273	SOSTDC1	0	0.75
Breast_SE_2274	ISPD	317441	0.66
Breast_SE_2276	AGR2	0	0.69
Breast_SE_2277	AHR	0	0.82
Breast_SE_228	DPYD	806562	0.87
Breast_SE_2281	TWIST1	0	0.89
Breast_SE_2284	LOC101927811	0	0.77
Breast_SE_2285	SP8	0	0.86
Breast_SE_2286	LOC100506178	0	0.59
Breast_SE_2287	IL6	0	0.73
Breast_SE_2288	FAM126A	0	0.68
Breast_SE_2289	IGF2BP3	0	0.87
Breast_SE_229	DPYD	918147	0.75
Breast_SE_2290	OSBPL3	0	0.66
Breast_SE_2291	OSBPL3	158892	0.92
Breast_SE_2292	OSBPL3	211801	0.55
Breast_SE_2293	NPVF	151344	0.99
Breast_SE_2298	CBX3	0	0.54
Breast_SE_230	MIR137	116291	0.54
Breast_SE_2300	SKAP2	177799	0.73
Breast_SE_2301	HOXA5	0	0.84
Breast_SE_2303	TRIL	0	0.86
Breast_SE_2304	CHN2	78481	0.83
Breast_SE_2305	PRR15	0	0.9
Breast_SE_2306	SCRN1	65003	0.84
Breast_SE_2307	MTURN	0	0.55
Breast_SE_2308	ZNRF2	0	0.7
Breast_SE_2309	DKFZP586I1420	21514	0.76
Breast_SE_231	DPYD-AS1	1144750	0.72
Breast_SE_2311	LINC01176	108379	0.68
Breast_SE_2313	AQP1	0	0.71
Breast_SE_2314	ADCYAP1R1	0	0.68
Breast_SE_2316	GHRHR	730579	0.91
Breast_SE_2317	PDE1C	307979	0.86
Breast_SE_2318	DPY19L1P1	0	0.66
Breast_SE_2319	RP9P	0	0.53
Breast_SE_2320	KBTBD2	21061	0.53
Breast_SE_2321	RP9	0	0.51
Breast_SE_2322	BMPER	0	0.59
Breast_SE_2323	BMPER	119013	0.51
Breast_SE_2324	EEPD1	0	0.53
Breast_SE_2325	EEPD1	79465	0.59
Breast_SE_2326	EEPD1	232674	0.59
Breast_SE_2327	AOAH	111690	0.57
Breast_SE_2328	LOC401324	1470264	0.65
Breast_SE_2329	AOAH-IT1	1064140	1
Breast_SE_233	LRRC39	0	0.55
Breast_SE_2330	EPDR1	0	0.82
Breast_SE_2331	TARP	0	0.94
Breast_SE_2332	LINC00265	0	0.5
Breast_SE_2333	VPS41	1213693	0.85
Breast_SE_2334	SUGCT	658138	0.74
Breast_SE_2336	INHBA	0	0.53
Breast_SE_2337	INHBA	0	0.65
Breast_SE_2339	INHBA	0	0.78
Breast_SE_2340	URGCP-MRPS24	0	0.76
Breast_SE_2341	GLI3	165104	0.9
Breast_SE_2342	STK17A	0	0.66
Breast_SE_2345	CAMK2B	0	0.52
Breast_SE_2347	ZMIZ2	0	0.54
Breast_SE_2348	ZMIZ2	0	0.6
Breast_SE_235	PRMT6	0	0.58
Breast_SE_2351	IGFBP1	0	0.75
Breast_SE_2353	TNS3	0	0.8
Breast_SE_2354	UPP1	0	0.79
Breast_SE_2355	LINC01447	2680297	0.93
Breast_SE_2356	GRB10	148341	0.85
Breast_SE_2358	COBL	239169	0.93
Breast_SE_236	PRMT6	0	0.58
Breast_SE_2360	ELDR	0	0.65
Breast_SE_2361	EGFR	0	0.76
Breast_SE_2363	ZNF713	0	0.77
Breast_SE_2364	ZNF713	0	0.77
Breast_SE_2365	ZNF713	0	0.77
Breast_SE_2366	ZNF713	0	0.77
Breast_SE_2367	ZNF713	0	0.77
Breast_SE_2368	ZNF713	0	0.77
Breast_SE_2369	VOPP1	29079	0.77
Breast_SE_237	CLCC1	0	0.59
Breast_SE_2370	ZNF713	0	0.67
Breast_SE_2371	ZNF713	62472	0.74
Breast_SE_2372	ZNF713	113107	0.65
Breast_SE_2373	ZNF736	312068	0.76
Breast_SE_2374	LOC441242	427580	0.5
Breast_SE_2375	TPST1	0	0.69
Breast_SE_2376	TPST1	138866	0.56
Breast_SE_2378	RABGEF1	43479	0.58
Breast_SE_2379	PMS2P4	24624	0.62
Breast_SE_238	VAV3	20106	0.63
Breast_SE_2381	AUTS2	1094125	0.93
Breast_SE_2382	CALN1	0	0.99
Breast_SE_2383	BAZ1B	68544	0.65
Breast_SE_2384	BAZ1B	224792	0.62
Breast_SE_2385	LIMK1	0	0.67
Breast_SE_2386	CLIP2	0	0.7
Breast_SE_2387	LOC101926943	0	0.66
Breast_SE_2388	HIP1	65010	0.79
Breast_SE_2389	MIR4651	0	0.54
Breast_SE_239	SLC25A24	55655	0.62
Breast_SE_2390	PMS2P3	529317	0.63
Breast_SE_2391	HSPB1	0	0.76
Breast_SE_2395	GSAP	71425	0.82
Breast_SE_2396	PTPN12	0	0.72
Breast_SE_2397	ZP3	1268841	0.64
Breast_SE_2398	GNAI1	0	0.93
Breast_SE_240	FAM102B	0	0.69
Breast_SE_2400	SEMA3C	37817	0.55
Breast_SE_2401	HGF	0	0.76
Breast_SE_2402	HGF	0	0.93
Breast_SE_2403	SEMA3D	285725	0.51
Breast_SE_2405	STEAP4	0	0.73
Breast_SE_2406	ZNF804B	266312	0.99
Breast_SE_2407	CDK14	0	0.77
Breast_SE_2408	FZD1	0	0.82
Breast_SE_241	STXBP3	0	0.78
Breast_SE_2410	CDK6	5338	0.85
Breast_SE_2411	GNG11	0	0.77
Breast_SE_2412	COL1A2	0	0.75
Breast_SE_2413	CASD1	0	0.77
Breast_SE_2414	SGCE	45466	0.89
Breast_SE_2415	DYNC1I1	0	0.51
Breast_SE_2416	PPP1R9A	0	0.82
Breast_SE_2418	DLX5	0	0.8
Breast_SE_2419	DLX6-AS1	0	0.55
Breast_SE_242	AKNAD1	0	0.53
Breast_SE_2421	DLX6	0	0.86
Breast_SE_2422	BRI3	0	0.69
Breast_SE_2424	PDAP1	0	0.66
Breast_SE_2425	LOC101927550	85597	0.68
Breast_SE_2427	ATP5J2	0	0.52
Breast_SE_2428	ZNF655	0	0.94
Breast_SE_243	SORT1	0	0.64
Breast_SE_2430	AZGP1	0	0.71
Breast_SE_2431	ZSCAN21	29307	0.7
Breast_SE_2433	SPDYE3	118616	0.72
Breast_SE_2434	FBXO24	0	0.59
Breast_SE_2435	GNB2	0	0.7
Breast_SE_2436	POP7	82047	0.62
Breast_SE_2437	MUC3A	0	0.63
Breast_SE_2438	PLOD3	0	0.7
Breast_SE_2439	COL26A1	0	0.55
Breast_SE_244	CELSR2	0	0.76
Breast_SE_2440	FIS1	476529	0.5
Breast_SE_2441	CUX1	0	0.53
Breast_SE_2442	SH2B2	0	0.69
Breast_SE_2443	ORAI2	0	0.67
Breast_SE_2445	NAPEPLD	13632	0.64
Breast_SE_2446	KMT2E-AS1	0	0.56
Breast_SE_2447	EFCAB10	0	0.59
Breast_SE_2449	NAMPT	0	0.68
Breast_SE_245	GNAT2	10435	0.6
Breast_SE_2450	NAMPT	168539	0.56
Breast_SE_2454	CBLL1	0	0.68
Breast_SE_2456	LAMB1	0	0.74
Breast_SE_2457	NRCAM	136429	0.78
Breast_SE_2458	NRCAM	187161	0.57
Breast_SE_246	AHCYL1	0	0.66
Breast_SE_2461	CAV1	0	0.5
Breast_SE_2462	CAV2	0	0.92
Breast_SE_2463	CAV2	170668	0.82
Breast_SE_2464	CTTNBP2	0	0.54
Breast_SE_2465	MIR6132	1032334	0.53
Breast_SE_2466	CPED1	0	0.68
Breast_SE_2467	FEZF1	0	0.61
Breast_SE_2468	FEZF1	0	0.57
Breast_SE_2469	WASL	63956	0.55
Breast_SE_247	KCNC4-AS1	0	0.76
Breast_SE_2471	HILPDA	0	0.73
Breast_SE_2472	FLNC	0	0.66
Breast_SE_2473	STRIP2	0	0.8
Breast_SE_2475	UBE2H	0	0.62
Breast_SE_2478	MEST	0	0.65
Breast_SE_248	AHCYL1	343328	0.5
Breast_SE_2480	CEP41	751831	0.65
Breast_SE_2481	PODXL	1819	0.84
Breast_SE_2483	AKR1B1	0	0.82
Breast_SE_2484	AKR1B15	0	0.71
Breast_SE_2485	CALD1	0	0.63
Breast_SE_2486	WDR91	0	0.72
Breast_SE_2487	CREB3L2	0	0.58
Breast_SE_2488	SVOPL	55586	0.74
Breast_SE_2489	ATP6V0A4	32128	0.67
Breast_SE_249	DENND2D	0	0.63
Breast_SE_2490	KIAA1549	242330	0.52
Breast_SE_2491	C7orf55-LUC7L2	0	0.5
Breast_SE_2492	C7orf55-LUC7L2	0	0.59
Breast_SE_2493	C7orf55-LUC7L2	16576	0.64
Breast_SE_2494	C7orf55-LUC7L2	16592	0.64
Breast_SE_2495	JHDM1D-AS1	0	0.72
Breast_SE_2496	HIPK2	57547	0.79
Breast_SE_2497	KDM7A	88448	0.51
Breast_SE_2498	KDM7A	89076	0.5
Breast_SE_2499	KDM7A	89527	0.5
Breast_SE_250	FAM212B	0	0.87
Breast_SE_2500	KDM7A	89597	0.5
Breast_SE_2501	KDM7A	89691	0.5
Breast_SE_2502	JHDM1D-AS1	14867	0.7
Breast_SE_2503	JHDM1D-AS1	126843	0.7
Breast_SE_2504	NDUFB2	0	0.76
Breast_SE_2505	DENND2A	77439	0.81
Breast_SE_2506	KIAA1147	0	0.81
Breast_SE_2508	PRSS58	516591	0.56
Breast_SE_2509	TRPV6	0	0.79
Breast_SE_251	ST7L	0	0.57
Breast_SE_2510	TRPV6	246426	0.92
Breast_SE_2511	GSTK1	0	0.63
Breast_SE_2512	CUL1	0	0.63
Breast_SE_2513	ZNF212	0	0.75
Breast_SE_2514	ZNF212	0	0.75
Breast_SE_2515	ZNF212	0	0.75
Breast_SE_2516	ZNF212	0	0.84
Breast_SE_2517	ZNF212	0	0.75
Breast_SE_2518	ZNF467	0	0.67
Breast_SE_2519	ATP6V0E2	0	0.8
Breast_SE_252	ST7L	71504	0.5
Breast_SE_2520	REPIN1	0	0.92
Breast_SE_2521	SLC4A2	0	0.8
Breast_SE_2522	SMARCD3	0	0.85
Breast_SE_2523	PRKAG2	0	0.79
Breast_SE_2524	LINC01003	0	0.62
Breast_SE_2525	LINC01003	0	0.61
Breast_SE_2526	PAXIP1	58221	0.65
Breast_SE_2528	LOC389602	0	0.62
Breast_SE_2529	PAXIP1	699132	0.72
Breast_SE_2530	SHH	0	0.51
Breast_SE_2531	LOC389602	0	0.58
Breast_SE_2532	C7orf13	270	0.75
Breast_SE_2533	MNX1	0	0.88
Breast_SE_2534	NOM1	304874	0.61
Breast_SE_2535	NCAPG2	6079	0.7
Breast_SE_2536	ESYT2	51899	0.76
Breast_SE_2537	LINC00689	0	0.6
Breast_SE_2538	ARHGEF10	0	0.74
Breast_SE_254	LINC01356	15400	0.74
Breast_SE_2540	DEFB1	0	0.56
Breast_SE_2543	MFHAS1	12970	0.56
Breast_SE_2545	PPP1R3B	0	0.54
Breast_SE_2546	SOX7	0	0.68
Breast_SE_2547	FAM167A	21157	0.82
Breast_SE_2548	NEIL2	0	0.66
Breast_SE_2549	CTSB	0	0.73
Breast_SE_255	LOC643441	0	0.85
Breast_SE_2550	LONRF1	29148	0.79
Breast_SE_2551	DLC1	0	0.88
Breast_SE_2552	C8orf48	0	0.81
Breast_SE_2553	MIR3926-2	676189	0.59
Breast_SE_2554	SLC7A2	0	0.74
Breast_SE_2555	LOC100128993	0	0.5
Breast_SE_2556	MTUS1	63321	0.86
Breast_SE_2557	PCM1	0	0.7
Breast_SE_2558	PSD3	506769	0.66
Breast_SE_256	MAGI3	0	0.79
Breast_SE_2560	SH2D4A	0	0.61
Breast_SE_2561	MTUS1	1762103	0.65
Breast_SE_2562	CSGALNACT1	198188	0.82
Breast_SE_2563	LZTS1	41259	0.9
Breast_SE_2564	REEP4	0	0.64
Breast_SE_2565	SLC39A14	0	0.75
Breast_SE_2566	PPP3CC	0	0.84
Breast_SE_2567	PPP3CC	90665	0.76
Breast_SE_2568	RHOBTB2	0	0.7
Breast_SE_2569	TNFRSF10B	42909	0.72
Breast_SE_2570	TNFRSF10A	25800	0.77
Breast_SE_2571	LOXL2	0	0.84
Breast_SE_2572	SLC25A37	0	0.84
Breast_SE_2574	NEFL	43219	0.78
Breast_SE_2575	DOCK5	0	0.87
Breast_SE_2576	ADRA1A	0	0.66
Breast_SE_2577	CDCA2	0	0.93
Breast_SE_2578	ADRA1A	0	0.5
Breast_SE_258	TRIM33	0	0.79
Breast_SE_2580	DPYSL2	56759	0.9
Breast_SE_2581	PBK	0	0.6
Breast_SE_2582	SCARA3	0	0.58
Breast_SE_2583	SCARA5	0	0.67
Breast_SE_2584	ZNF395	0	0.65
Breast_SE_2585	FBXO16	771359	0.5
Breast_SE_2586	DUSP4	0	0.68
Breast_SE_2588	EXTL3	1125605	0.54
Breast_SE_2589	DCTN6	0	0.58
Breast_SE_259	TRIM33	0	0.79
Breast_SE_2590	RBPMS-AS1	0	0.83
Breast_SE_2591	RBPMS	23467	0.75
Breast_SE_2592	GSR	0	0.63
Breast_SE_2594	NRG1	584056	0.76
Breast_SE_2595	NRG1	654593	0.72
Breast_SE_2596	NRG1	899623	0.92
Breast_SE_2597	NRG1	1022653	0.76
Breast_SE_2598	RNF122	6110	0.7
Breast_SE_26	TNFRSF1B	0	0.61
Breast_SE_260	OLFML3	129120	0.59
Breast_SE_2600	STAR	0	0.7
Breast_SE_2604	ZNF703	0	0.67
Breast_SE_2605	ZNF703	0	0.72
Breast_SE_2606	RAB11FIP1	0	0.68
Breast_SE_2607	ASH2L	0	0.55
Breast_SE_2608	ASH2L	0	0.59
Breast_SE_2609	ASH2L	55102	0.73
Breast_SE_261	TRIM33	81495	0.85
Breast_SE_2610	LSM1	103104	0.7
Breast_SE_2611	LSM1	103958	0.71
Breast_SE_2612	FGFR1	0	0.83
Breast_SE_2614	EIF4EBP1	666729	0.62
Breast_SE_2615	PLEKHA2	0	0.78
Breast_SE_2616	LSM1	829521	0.7
Breast_SE_2617	IDO1	0	0.72
Breast_SE_262	HIPK1-AS1	827997	0.52
Breast_SE_2621	ZMAT4	0	0.71
Breast_SE_2622	SFRP1	0	0.71
Breast_SE_2623	ANK1	27635	0.84
Breast_SE_2624	VDAC3	0	0.69
Breast_SE_2625	PLAT	0	0.73
Breast_SE_2626	IKBKB	0	0.62
Breast_SE_2627	SLC20A2	41994	0.51
Breast_SE_2628	VDAC3	494222	0.83
Breast_SE_2629	HOOK3	155993	0.71
Breast_SE_263	HIPK1-AS1	831277	0.52
Breast_SE_2630	VDAC3	747018	0.78
Breast_SE_2631	VDAC3	747064	0.77
Breast_SE_2632	VDAC3	747255	0.77
Breast_SE_2633	POTEA	2800222	0.56
Breast_SE_2634	POTEA	2881682	0.6
Breast_SE_2635	POTEA	3081071	0.53
Breast_SE_2637	CEBPD	0	0.6
Breast_SE_2638	ST18	0	0.53
Breast_SE_2639	CEBPD	0	0.79
Breast_SE_264	HIPK1-AS1	831827	0.52
Breast_SE_2640	SNAI2	0	0.77
Breast_SE_2641	SNAI2	0	0.79
Breast_SE_2642	LOC101929268	0	0.67
Breast_SE_2643	SNAI2	0	0.57
Breast_SE_2645	SNAI2	0	0.84
Breast_SE_2646	PCMTD1	53193	0.67
Breast_SE_2647	ST18	0	0.55
Breast_SE_2648	RB1CC1	90758	0.62
Breast_SE_265	HIPK1-AS1	831960	0.52
Breast_SE_2651	RGS20	15894	0.86
Breast_SE_2652	SOX17	0	0.91
Breast_SE_2653	SOX17	0	0.93
Breast_SE_2654	LYN	0	0.72
Breast_SE_2656	NSMAF	63988	0.6
Breast_SE_2658	CA8	0	0.62
Breast_SE_2659	CA8	0	0.9
Breast_SE_266	TSPAN2	12869	0.77
Breast_SE_2660	RAB2A	0	0.74
Breast_SE_2661	CHD7	0	0.69
Breast_SE_2662	LOC100130298	0	0.56
Breast_SE_2663	ASPH	91114	0.76
Breast_SE_2666	C8orf44	0	0.64
Breast_SE_2667	PDE7A	121024	0.59
Breast_SE_2668	PDE7A	125670	0.59
Breast_SE_2669	PDE7A	125895	0.59
Breast_SE_267	NGF	0	0.82
Breast_SE_2670	PDE7A	125901	0.59
Breast_SE_2671	PDE7A	126352	0.59
Breast_SE_2673	PDE7A	304095	0.56
Breast_SE_2674	C8orf44	0	0.62
Breast_SE_2675	MYBL1	0	0.78
Breast_SE_2676	C8orf44-SGK3	21131	0.65
Breast_SE_2677	CSPP1	0	0.69
Breast_SE_2678	SULF1	0	0.69
Breast_SE_268	NGF	138799	0.73
Breast_SE_2680	SLCO5A1	713005	0.57
Breast_SE_2681	SLCO5A1	728625	0.58
Breast_SE_2682	SLCO5A1	728669	0.58
Breast_SE_2683	SLCO5A1	728847	0.57
Breast_SE_2684	SLCO5A1	728868	0.57
Breast_SE_2685	SLCO5A1	729262	0.57
Breast_SE_2686	SLCO5A1	729313	0.57
Breast_SE_2687	MSC	0	0.89
Breast_SE_2688	SBSPON	9905	0.97
Breast_SE_269	CASQ2	0	0.51
Breast_SE_2690	STAU2-AS1	0	0.57
Breast_SE_2694	ZFHX4	0	0.92
Breast_SE_2695	STMN2	0	0.7
Breast_SE_2696	TPD52	31163	0.77
Breast_SE_2697	ZBTB10	0	0.84
Breast_SE_2698	ZBTB10	0	0.84
Breast_SE_2699	ZBTB10	0	0.84
Breast_SE_27	DHRS3	0	0.78
Breast_SE_270	SLC22A15	0	0.75
Breast_SE_2700	ZBTB10	0	0.84
Breast_SE_2701	ZBTB10	0	0.84
Breast_SE_2702	ZBTB10	0	0.84
Breast_SE_2703	ZBTB10	0	0.84
Breast_SE_2704	ZBTB10	0	0.84
Breast_SE_2705	ZBTB10	0	0.84
Breast_SE_2706	ZBTB10	0	0.84
Breast_SE_2707	ZBTB10	0	0.84
Breast_SE_2708	ZBTB10	0	0.84
Breast_SE_2709	FABP5	0	0.75
Breast_SE_2713	CA2	364733	0.74
Breast_SE_2714	CNBD1	1068923	0.92
Breast_SE_2715	MMP16	288713	0.88
Breast_SE_2716	LINC01030	0	0.62
Breast_SE_2717	OSGIN2	0	0.69
Breast_SE_2718	OSGIN2	0	0.65
Breast_SE_2719	DECR1	0	0.76
Breast_SE_272	LOC101929099	0	0.71
Breast_SE_2720	CALB1	0	0.83
Breast_SE_2721	TMEM64	10400	0.78
Breast_SE_2722	LINC01030	248230	0.99
Breast_SE_2723	RUNX1T1	0	0.88
Breast_SE_2724	PDP1	0	0.72
Breast_SE_2725	GEM	0	0.54
Breast_SE_2726	GEM	0	0.71
Breast_SE_2727	ESRP1	0	0.98
Breast_SE_2728	TP53INP1	2095	0.78
Breast_SE_2729	LOC100288748	386187	0.83
Breast_SE_273	LOC101929099	0	0.59
Breast_SE_2730	LOC100288748	550622	0.66
Breast_SE_2731	SDC2	0	0.66
Breast_SE_2732	SDC2	0	0.92
Breast_SE_2733	UQCRB	1412851	0.69
Breast_SE_2734	UQCRB	1416309	0.69
Breast_SE_2735	TSPYL5	463073	0.58
Breast_SE_2736	STK3	0	0.61
Breast_SE_2737	KCNS2	0	0.7
Breast_SE_2738	OSR2	0	0.73
Breast_SE_2739	OSR2	0	0.67
Breast_SE_2740	KCNS2	1276616	0.59
Breast_SE_2741	KCNS2	1360387	0.92
Breast_SE_2742	RGS22	0	0.7
Breast_SE_2744	RNF19A	20243	0.69
Breast_SE_2745	GRHL2	0	0.83
Breast_SE_2746	PABPC1	0	0.71
Breast_SE_2747	PABPC1	16666	0.69
Breast_SE_2748	ZNF706	0	0.51
Breast_SE_275	IGSF3	88545	0.82
Breast_SE_2750	UBR5	0	0.68
Breast_SE_2751	UBR5	0	0.68
Breast_SE_2752	UBR5	0	0.68
Breast_SE_2753	UBR5	0	0.68
Breast_SE_2754	UBR5	0	0.68
Breast_SE_2755	GRHL2	0	0.66
Breast_SE_2756	ATP6V1C1	0	0.52
Breast_SE_2757	NCALD	319927	0.72
Breast_SE_2758	MIR3151	0	0.53
Breast_SE_2759	UBR5	158354	0.53
Breast_SE_276	PTGFRN	0	0.81
Breast_SE_2760	UBR5	324620	0.53
Breast_SE_2763	FZD6	0	0.76
Breast_SE_2764	CTHRC1	0	0.88
Breast_SE_2765	RIMS2	0	0.62
Breast_SE_2766	ZFPM2-AS1	263738	0.68
Breast_SE_2768	OXR1	322240	0.67
Breast_SE_277	VTCN1	2125	0.81
Breast_SE_2770	TRPS1	1492	0.8
Breast_SE_2771	TRPS1	357918	0.82
Breast_SE_2773	SAMD12-AS1	0	0.58
Breast_SE_2774	AARD	0	0.71
Breast_SE_2775	AARD	0	0.61
Breast_SE_2777	TRPS1	1034039	0.57
Breast_SE_2779	AARD	0	0.86
Breast_SE_278	TRIM45	228332	0.56
Breast_SE_2781	EXT1	0	0.77
Breast_SE_2782	SLC30A8	1237321	0.63
Breast_SE_2785	MAL2	0	0.91
Breast_SE_2786	DEPTOR	0	0.64
Breast_SE_2787	DEPTOR	71956	0.87
Breast_SE_2788	COLEC10	1776811	0.6
Breast_SE_279	FAM46C	0	0.86
Breast_SE_2790	HAS2	11758	0.75
Breast_SE_2796	ZHX2	0	0.77
Breast_SE_2797	FAM83A	0	0.57
Breast_SE_2798	ZHX1	20715	0.8
Breast_SE_2799	ZHX1	23259	0.8
Breast_SE_28	PDPN	0	0.71
Breast_SE_280	TBX15	42114	0.62
Breast_SE_2800	ZHX1	23402	0.8
Breast_SE_2801	ZHX1	24491	0.8
Breast_SE_2802	FBXO32	0	0.5
Breast_SE_2803	FBXO32	0	0.74
Breast_SE_2804	RNF139-AS1	0	0.59
Breast_SE_2805	TATDN1	0	0.79
Breast_SE_2806	RNF139-AS1	47313	0.69
Breast_SE_2809	ZNF572	0	0.51
Breast_SE_2810	SQLE	0	0.64
Breast_SE_2811	RNF139-AS1	597797	0.7
Breast_SE_2814	TATDN1	873174	0.58
Breast_SE_2816	FAM84B	0	0.88
Breast_SE_2818	CCAT2	0	0.65
Breast_SE_2819	CCAT2	0	0.58
Breast_SE_282	PHGDH	0	0.74
Breast_SE_2820	CCAT2	0	0.57
Breast_SE_2822	CASC8	0	0.72
Breast_SE_2823	TMEM75	0	0.69
Breast_SE_2824	CASC8	271788	0.54
Breast_SE_2825	PVT1	0	0.67
Breast_SE_2827	CCAT2	1023244	0.7
Breast_SE_2828	LINC00824	119037	0.61
Breast_SE_2829	ASAP1-IT1	0	0.69
Breast_SE_283	HMGCS2	17509	0.56
Breast_SE_2830	ASAP1	0	0.69
Breast_SE_2832	KCNQ3	383857	0.81
Breast_SE_2833	NDRG1	0	0.68
Breast_SE_2834	ST3GAL1	24794	0.54
Breast_SE_2837	MIR30B	406979	0.68
Breast_SE_2838	PTK2	0	0.63
Breast_SE_284	PDZK1	12700	0.52
Breast_SE_2840	PTK2	318617	0.63
Breast_SE_2841	SLC45A4	0	0.51
Breast_SE_2844	LOC100288181	0	0.56
Breast_SE_2845	SLURP1	0	0.68
Breast_SE_2847	LOC100133669	26161	0.82
Breast_SE_2848	TOP1MT	0	0.62
Breast_SE_2849	TOP1MT	50397	0.62
Breast_SE_285	POLR3GL	0	0.58
Breast_SE_2850	FAM83H-AS1	0	0.9
Breast_SE_2851	EEF1D	180902	0.75
Breast_SE_2852	MAF1	0	0.66
Breast_SE_2854	SLC39A4	0	0.55
Breast_SE_2855	ZNF34	0	0.75
Breast_SE_2856	ZNF250	0	0.74
Breast_SE_2857	ZNF250	23069	0.74
Breast_SE_2858	ZNF250	23101	0.74
Breast_SE_2859	ZNF250	23123	0.74
Breast_SE_286	RNF115	285917	0.53
Breast_SE_2860	KANK1	143789	0.81
Breast_SE_2861	DMRT1	118202	0.9
Breast_SE_2863	SMARCA2	0	0.86
Breast_SE_2865	RFX3-AS1	0	0.57
Breast_SE_2866	VLDLR	0	0.78
Breast_SE_2867	AK3	0	0.61
Breast_SE_2869	GLIS3-AS1	0	0.57
Breast_SE_287	GPR89B	0	0.5
Breast_SE_2870	GLIS3	200368	0.8
Breast_SE_2871	GLIS3	377154	0.71
Breast_SE_2872	PLGRKT	0	0.53
Breast_SE_2873	ERMP1	0	0.7
Breast_SE_2874	JAK2	0	0.68
Breast_SE_2875	CD274	41249	0.76
Breast_SE_2876	KIAA2026	0	0.87
Breast_SE_2877	ERMP1	6489	0.79
Breast_SE_2879	PDCD1LG2	1019914	0.71
Breast_SE_288	BCL9	0	0.55
Breast_SE_2880	KIAA2026	752542	0.57
Breast_SE_2881	KDM4C	29390	0.78
Breast_SE_2882	KDM4C	34327	0.78
Breast_SE_2884	LURAP1L	0	0.7
Breast_SE_2885	CER1	0	0.57
Breast_SE_2887	BNC2	0	0.51
Breast_SE_2888	LINC01235	4327	0.97
Breast_SE_2889	LINC01235	74988	0.91
Breast_SE_289	ACP6	0	0.75
Breast_SE_2890	LINC01235	148007	0.96
Breast_SE_2891	LINC01235	300135	0.65
Breast_SE_2892	ZDHHC21	0	0.57
Breast_SE_2893	NFIB	210662	0.79
Breast_SE_2894	TTC39B	122739	0.78
Breast_SE_2895	ADAMTSL1	0	0.64
Breast_SE_2897	BNC2	289233	0.89
Breast_SE_2898	ADAMTSL1	0	0.55
Breast_SE_2899	PLIN2	0	0.63
Breast_SE_29	PRDM2	47887	0.58
Breast_SE_290	GJA5	0	0.8
Breast_SE_2900	DENND4C	0	0.73
Breast_SE_2901	DENND4C	0	0.73
Breast_SE_2904	MIR31HG	71768	0.81
Breast_SE_2905	MIR31HG	201812	0.77
Breast_SE_2906	KLHL9	401352	0.62
Breast_SE_2907	CDKN2A	0	0.84
Breast_SE_2908	CDKN2B	26565	0.58
Breast_SE_2909	TUSC1	588	0.91
Breast_SE_291	GPR89B	442901	0.5
Breast_SE_2910	EQTN	77048	0.66
Breast_SE_2912	ACO1	0	0.62
Breast_SE_2914	DNAJA1	0	0.59
Breast_SE_2917	NOL6	272248	0.62
Breast_SE_2918	UBE2R2	0	0.55
Breast_SE_2919	UBE2R2	0	0.56
Breast_SE_292	HIST2H2AC	0	0.54
Breast_SE_2921	SIGMAR1	0	0.76
Breast_SE_2922	ARID3C	0	0.5
Breast_SE_2923	CCL27	0	0.63
Breast_SE_2925	RUSC2	0	0.7
Breast_SE_2926	TESK1	0	0.84
Breast_SE_2927	TLN1	0	0.67
Breast_SE_2928	TMEM8B	0	0.66
Breast_SE_2929	HRCT1	0	0.76
Breast_SE_293	OTUD7B	37402	0.66
Breast_SE_2930	GLIPR2	0	0.72
Breast_SE_2931	GNE	29252	0.64
Breast_SE_2932	GRHPR	0	0.61
Breast_SE_2933	TRMT10B	30075	0.76
Breast_SE_2934	SHB	0	0.72
Breast_SE_2935	DCAF10	353511	0.52
Breast_SE_2936	ALDH1B1	0	0.54
Breast_SE_2937	TJP2	0	0.55
Breast_SE_2938	PGM5	966620	0.56
Breast_SE_2939	C9orf135	0	0.51
Breast_SE_294	PLEKHO1	0	0.83
Breast_SE_2940	C9orf135	40415	0.69
Breast_SE_2941	MAMDC2-AS1	0	0.57
Breast_SE_2942	KLF9	5078	0.61
Breast_SE_2944	KLF9	168871	0.66
Breast_SE_2947	GDA	0	0.73
Breast_SE_295	ANP32E	0	0.7
Breast_SE_2950	ANXA1	0	0.61
Breast_SE_2952	RORB-AS1	0	0.76
Breast_SE_2953	OSTF1	0	0.67
Breast_SE_2954	GCNT1	0	0.62
Breast_SE_2955	GCNT1	68621	0.61
Breast_SE_2957	TLE4	0	0.62
Breast_SE_2958	GKAP1	0	0.62
Breast_SE_2959	TLE1	0	0.53
Breast_SE_296	RPRD2	0	0.69
Breast_SE_2960	TLE1	102046	0.88
Breast_SE_2961	RASEF	41010	0.89
Breast_SE_2966	SLC28A3	0	0.77
Breast_SE_2968	GOLM1	35970	0.64
Breast_SE_297	MIR6878	13915	0.72
Breast_SE_2970	GAS1	0	0.86
Breast_SE_2971	GAS1	314812	0.64
Breast_SE_2973	DAPK1	0	0.86
Breast_SE_2974	CTSL	0	0.83
Breast_SE_2976	NXNL2	0	0.69
Breast_SE_2977	C9orf47	0	0.5
Breast_SE_2978	S1PR3	0	0.57
Breast_SE_2979	SECISBP2	0	0.59
Breast_SE_298	ANXA9	0	0.76
Breast_SE_2980	GADD45G	0	0.78
Breast_SE_2981	GADD45G	0	0.88
Breast_SE_2982	LINC01508	117236	0.84
Breast_SE_2985	IARS	0	0.69
Breast_SE_2986	NFIL3	9239	0.73
Breast_SE_2987	ROR2	0	0.97
Breast_SE_299	ARNT	214670	0.76
Breast_SE_2990	BICD2	0	0.55
Breast_SE_2991	NINJ1	0	0.62
Breast_SE_2992	C9orf129	0	0.51
Breast_SE_2993	FAM120AOS	0	0.57
Breast_SE_2994	C9orf129	239148	0.55
Breast_SE_2995	FAM120A	682080	0.64
Breast_SE_2996	FBP1	18319	0.56
Breast_SE_2997	MIR24-1	0	0.65
Breast_SE_2998	MIR3074	0	0.73
Breast_SE_2999	PTCH1	0	0.77
Breast_SE_3	SKI	0	0.64
Breast_SE_30	KAZN	271532	0.71
Breast_SE_300	GABPB2	116418	0.62
Breast_SE_3001	LINC00092	0	0.74
Breast_SE_3002	CDC14B	0	0.62
Breast_SE_3003	NUTM2G	0	0.52
Breast_SE_3004	TMOD1	0	0.61
Breast_SE_3005	XPA	21812	0.52
Breast_SE_3007	NANS	0	0.68
Breast_SE_3008	COL15A1	0	0.6
Breast_SE_3009	GALNT12	1010750	0.53
Breast_SE_301	RFX5	0	0.67
Breast_SE_3010	MSANTD3	0	0.69
Breast_SE_3012	ABCA1	76611	0.8
Breast_SE_3013	ABCA1	322577	0.55
Breast_SE_3014	ZNF462	0	0.77
Breast_SE_3016	KLF4	0	0.65
Breast_SE_302	RFX5	57234	0.65
Breast_SE_3021	TMEM245	82849	0.68
Breast_SE_3022	EPB41L4B	77845	0.5
Breast_SE_3023	EPB41L4B	116985	0.67
Breast_SE_3024	PTPN3	64698	0.81
Breast_SE_3025	PALM2-AKAP2	234964	0.91
Breast_SE_3026	C9orf152	0	0.9
Breast_SE_3027	TXN	0	0.54
Breast_SE_3029	UGCG	0	0.57
Breast_SE_303	CGN	0	0.78
Breast_SE_3030	KIAA0368	120506	0.51
Breast_SE_3031	KIAA0368	120987	0.51
Breast_SE_3032	PTGR1	47342	0.64
Breast_SE_3035	UGCG	0	0.66
Breast_SE_3036	PTGR1	614172	0.63
Breast_SE_3037	SLC46A2	0	0.83
Breast_SE_3038	ALAD	0	0.63
Breast_SE_3039	ALAD	0	0.67
Breast_SE_304	RORC	0	0.86
Breast_SE_3040	ALAD	68542	0.61
Breast_SE_3041	AMBP	12089	0.83
Breast_SE_3042	ZNF618	324506	0.7
Breast_SE_3043	ALAD	1097332	0.51
Breast_SE_3044	BSPRY	1231207	0.61
Breast_SE_3047	TNFSF15	232675	0.75
Breast_SE_3049	PAPPA	0	0.65
Breast_SE_305	LOC100132111	0	0.83
Breast_SE_3050	PAPPA	0	0.72
Breast_SE_3051	AKNA	1734151	0.5
Breast_SE_3052	PAPPA	0	0.8
Breast_SE_3053	TLR4	0	0.78
Breast_SE_3056	MEGF9	94317	0.81
Breast_SE_3057	TRAF1	0	0.58
Breast_SE_3058	GSN	37723	0.8
Breast_SE_3059	DAB2IP	0	0.63
Breast_SE_3060	TTLL11	108761	0.69
Breast_SE_3061	PTGS1	0	0.66
Breast_SE_3063	MIR601	521701	0.56
Breast_SE_3064	NEK6	0	0.8
Breast_SE_3065	NEK6	394882	0.5
Breast_SE_3066	OLFML2A	0	0.54
Breast_SE_3069	LMX1B	0	0.84
Breast_SE_307	FLG	0	0.75
Breast_SE_3070	MIR3911	0	0.54
Breast_SE_3073	MIR3911	0	0.6
Breast_SE_3075	ODF2	0	0.58
Breast_SE_3076	PKN3	0	0.74
Breast_SE_3077	LRRC8A	0	0.65
Breast_SE_3078	IER5L	0	0.62
Breast_SE_3079	IER5L	130777	0.7
Breast_SE_308	IVL	0	0.8
Breast_SE_3081	FNBP1	31433	0.76
Breast_SE_3083	ASS1	0	0.75
Breast_SE_3084	FIBCD1	0	0.67
Breast_SE_3085	AIF1L	0	0.68
Breast_SE_3086	FAM78A	0	0.58
Breast_SE_3087	AIF1L	240460	0.67
Breast_SE_3088	UCK1	0	0.59
Breast_SE_3089	RAPGEF1	0	0.61
Breast_SE_309	S100A9	0	0.73
Breast_SE_3090	NTNG2	0	0.55
Breast_SE_3093	TTF1	293266	0.59
Breast_SE_3094	TTF1	293578	0.59
Breast_SE_3095	TTF1	293811	0.59
Breast_SE_3096	OBP2B	0	0.57
Breast_SE_3097	CEL	0	0.63
Breast_SE_3098	RALGDS	491	0.52
Breast_SE_31	CELA2A	0	0.58
Breast_SE_310	S100A1	0	0.59
Breast_SE_3100	SURF1	96836	0.54
Breast_SE_3101	SARDH	0	0.72
Breast_SE_3102	SURF2	411794	0.5
Breast_SE_3103	BRD3	0	0.54
Breast_SE_3104	CACFD1	663424	0.55
Breast_SE_3105	RXRA	0	0.58
Breast_SE_3106	SOHLH1	0	0.61
Breast_SE_3107	PPP1R26	0	0.71
Breast_SE_3108	UBAC1	0	0.5
Breast_SE_3109	UBAC1	110490	0.56
Breast_SE_311	GATAD2B	0	0.57
Breast_SE_3110	UBAC1	350319	0.65
Breast_SE_3112	ARRDC1	0	0.72
Breast_SE_3113	TUBB8	26523	0.6
Breast_SE_3114	ZMYND11	0	0.73
Breast_SE_3116	GTPBP4	0	0.74
Breast_SE_3117	LARP4B	226176	0.58
Breast_SE_312	JTB	0	0.55
Breast_SE_3120	PFKP	0	0.51
Breast_SE_3121	PFKP	0	0.72
Breast_SE_3123	LINC00702	0	0.64
Breast_SE_3125	LINC00702	0	0.6
Breast_SE_3126	LINC00702	22155	0.55
Breast_SE_3127	LINC00702	137258	0.53
Breast_SE_3128	LINC00704	0	0.52
Breast_SE_3129	LINC00704	0	0.59
Breast_SE_3130	AKR1C4	0	0.54
Breast_SE_3131	TUBAL3	19577	0.64
Breast_SE_3132	FAM208B	0	0.61
Breast_SE_3133	RBM17	0	0.69
Breast_SE_3134	IL15RA	0	0.71
Breast_SE_3135	PFKFB3	0	0.65
Breast_SE_3136	LINC00706	0	0.78
Breast_SE_3137	SFMBT2	248241	0.95
Breast_SE_3138	GATA3	0	0.9
Breast_SE_314	IL6R	0	0.65
Breast_SE_3140	GATA3-AS1	800607	0.98
Breast_SE_3141	GATA3-AS1	896625	0.9
Breast_SE_3142	SFTA1P	7851	0.71
Breast_SE_3143	CELF2	682621	0.83
Breast_SE_3144	PROSER2	0	0.91
Breast_SE_3145	USP6NL	581077	0.72
Breast_SE_3146	CCDC3	0	0.64
Breast_SE_3148	LOC101928453	0	0.65
Breast_SE_3149	LOC101928453	0	0.69
Breast_SE_315	ADAR	17520	0.56
Breast_SE_3150	LOC101928453	0	0.72
Breast_SE_3151	LOC101928453	321489	0.77
Breast_SE_3153	NMT2	60806	0.86
Breast_SE_3154	VIM-AS1	0	0.85
Breast_SE_3155	VIM-AS1	0	0.82
Breast_SE_3156	ST8SIA6	115557	0.95
Breast_SE_3157	VIM-AS1	288680	0.66
Breast_SE_3158	STAM	0	0.7
Breast_SE_3159	MALRD1	154950	0.98
Breast_SE_316	FLAD1	0	0.79
Breast_SE_3161	PLXDC2	0	0.82
Breast_SE_3162	NEBL	391044	0.83
Breast_SE_3163	CASC10	0	0.69
Breast_SE_3164	CASC10	0	0.56
Breast_SE_3165	DNAJC1	470935	0.57
Breast_SE_3166	COMMD3-BMI1	0	0.89
Breast_SE_3167	PIP4K2A	61812	0.81
Breast_SE_3168	LOC100499489	375590	0.57
Breast_SE_317	MUC1	0	0.65
Breast_SE_3170	C10orf67	28073	0.82
Breast_SE_3171	OTUD1	0	0.6
Breast_SE_3172	KIAA1217	498548	0.77
Breast_SE_3174	ARHGAP21	133833	0.78
Breast_SE_3175	ENKUR	76767	0.54
Breast_SE_3176	APBB1IP	46592	0.83
Breast_SE_3177	MASTL	0	0.71
Breast_SE_3178	MASTL	0	0.71
Breast_SE_3179	MASTL	0	0.71
Breast_SE_318	YY1AP1	0	0.8
Breast_SE_3180	WAC-AS1	0	0.81
Breast_SE_3181	RAB18	0	0.69
Breast_SE_3182	ARMC4	0	0.73
Breast_SE_3183	ARMC4	222272	0.79
Breast_SE_3184	MPP7	188672	0.73
Breast_SE_3185	WAC	0	0.82
Breast_SE_3186	BAMBI	0	0.94
Breast_SE_3187	BAMBI	372194	0.73
Breast_SE_3188	LINC01517	498219	0.67
Breast_SE_3189	MIR604	0	0.65
Breast_SE_319	YY1AP1	0	0.8
Breast_SE_3190	SVIL	123218	0.6
Breast_SE_3192	SVIL-AS1	534558	0.53
Breast_SE_3193	MAP3K8	0	0.75
Breast_SE_3194	ZEB1	0	0.73
Breast_SE_3195	ZNF438	136222	0.63
Breast_SE_3196	ZEB1	0	0.92
Breast_SE_3197	ZEB1	375153	0.78
Breast_SE_3198	ZEB1	420022	0.65
Breast_SE_3199	ARHGAP12	81508	0.81
Breast_SE_32	TMEM51	0	0.73
Breast_SE_320	ASH1L-AS1	74689	0.59
Breast_SE_3200	EPC1	0	0.65
Breast_SE_3201	ARHGAP12	502386	0.72
Breast_SE_3202	ITGB1	6008	0.75
Breast_SE_3203	NRP1	0	0.89
Breast_SE_3205	LOC101929431	2501308	0.58
Breast_SE_3206	MIR4683	0	0.74
Breast_SE_3207	GJD4	1160675	0.98
Breast_SE_3208	ANKRD30A	0	0.97
Breast_SE_3209	RASGEF1A	0	0.7
Breast_SE_321	YY1AP1	24227	0.77
Breast_SE_3210	HNRNPF	0	0.67
Breast_SE_3211	CXCL12	0	0.57
Breast_SE_3212	LINC00841	254815	0.73
Breast_SE_3213	CXCL12	10721	0.9
Breast_SE_3214	RASSF4	0	0.74
Breast_SE_3216	ANTXRL	0	0.75
Breast_SE_3218	ZNF488	18219	0.8
Breast_SE_3219	FAM25C	873935	0.58
Breast_SE_322	YY1AP1	224820	0.73
Breast_SE_3220	ARHGAP22	0	0.51
Breast_SE_3221	ARHGAP22	133249	0.75
Breast_SE_3222	PGBD3	6608	0.64
Breast_SE_3223	SGMS1	296812	0.68
Breast_SE_3224	DKK1	0	0.82
Breast_SE_3225	DKK1	118629	0.62
Breast_SE_3226	CISD1	0	0.55
Breast_SE_3227	BICC1	110172	0.6
Breast_SE_3228	CCDC6	34496	0.72
Breast_SE_3229	ANK3	0	0.64
Breast_SE_323	MEF2D	0	0.5
Breast_SE_3230	RTKN2	0	0.51
Breast_SE_3231	ARID5B	0	0.72
Breast_SE_3233	RTKN2	36832	0.54
Breast_SE_3234	EGR2	0	0.76
Breast_SE_3235	EGR2	65934	0.86
Breast_SE_3236	JMJD1C-AS1	0	0.62
Breast_SE_3237	HERC4	113454	0.78
Breast_SE_3238	PBLD	14358	0.5
Breast_SE_3239	SRGN	0	0.73
Breast_SE_324	RRNAD1	0	0.76
Breast_SE_3240	TSPAN15	0	0.53
Breast_SE_3241	COL13A1	0	0.82
Breast_SE_3242	AIFM2	0	0.6
Breast_SE_3243	LRRC20	59315	0.51
Breast_SE_3244	ADAMTS14	0	0.84
Breast_SE_3245	PCBD1	0	0.69
Breast_SE_3246	UNC5B	0	0.61
Breast_SE_3249	CHST3	0	0.78
Breast_SE_325	PEAR1	0	0.76
Breast_SE_3250	DDIT4	0	0.7
Breast_SE_3253	CHCHD1	0	0.59
Breast_SE_3254	VCL	147235	0.63
Breast_SE_3255	KAT6B	0	0.64
Breast_SE_3256	DUPD1	65670	0.71
Breast_SE_3257	KAT6B	332840	0.73
Breast_SE_3258	ZNF503	70640	0.82
Breast_SE_3259	KCNMA1	279825	0.6
Breast_SE_326	CRABP2	374350	0.7
Breast_SE_3260	KCNMA1	418121	0.76
Breast_SE_3261	DLG5	4915	0.81
Breast_SE_3262	DLG5-AS1	814696	0.66
Breast_SE_3263	ZMIZ1-AS1	0	0.76
Breast_SE_3264	ZMIZ1	0	0.74
Breast_SE_3265	ZCCHC24	0	0.79
Breast_SE_3266	ANXA11	0	0.83
Breast_SE_3267	TSPAN14	0	0.76
Breast_SE_3268	LOC100130698	692076	0.72
Breast_SE_3271	PAPSS2	0	0.51
Breast_SE_3272	GLUD1	0	0.72
Breast_SE_3273	GLUD1	28965	0.7
Breast_SE_3274	PAPSS2	0	0.63
Breast_SE_3275	KLLN	0	0.65
Breast_SE_3277	STAMBPL1	0	0.78
Breast_SE_3278	FAS	0	0.7
Breast_SE_3279	IFIT2	0	0.5
Breast_SE_3280	IFIT2	23312	0.61
Breast_SE_3283	HTR7	62911	0.88
Breast_SE_3284	ANKRD1	0	0.81
Breast_SE_3285	MYOF	41945	0.64
Breast_SE_3286	PDLIM1	0	0.73
Breast_SE_3287	FRAT2	0	0.82
Breast_SE_329	DUSP23	18205	0.67
Breast_SE_3290	MORN4	18109	0.71
Breast_SE_3291	MARVELD1	0	0.84
Breast_SE_3294	PYROXD2	0	0.53
Breast_SE_3295	SCD	0	0.54
Breast_SE_3296	SCD	0	0.53
Breast_SE_3297	DNMBP	0	0.51
Breast_SE_3299	DNMBP	13261	0.7
Breast_SE_33	EFHD2	0	0.52
Breast_SE_330	CFAP45	173685	0.56
Breast_SE_3300	SCD	0	0.68
Breast_SE_3301	WNT8B	246881	0.92
Breast_SE_3302	KAZALD1	0	0.68
Breast_SE_3306	CUEDC2	0	0.6
Breast_SE_3308	TRIM8	0	0.67
Breast_SE_3310	SH3PXD2A	0	0.51
Breast_SE_3311	CFAP58	0	0.76
Breast_SE_3312	ITPRIP	0	0.69
Breast_SE_3313	LOC101927523	0	0.9
Breast_SE_3314	SH3PXD2A-AS1	2676875	0.6
Breast_SE_3318	ADD3-AS1	0	0.74
Breast_SE_3319	XPNPEP1	338963	0.64
Breast_SE_3320	DUSP5	0	0.62
Breast_SE_3321	MIR4680	0	0.82
Breast_SE_3323	TCF7L2	0	0.73
Breast_SE_3324	PLEKHS1	0	0.69
Breast_SE_3325	VWA2	0	0.55
Breast_SE_3326	AFAP1L2	5395	0.63
Breast_SE_3327	ABLIM1	40029	0.83
Breast_SE_3328	ABLIM1	171729	0.65
Breast_SE_333	VANGL2	0	0.86
Breast_SE_3330	GFRA1	0	0.59
Breast_SE_3331	PNLIPRP1	0	0.88
Breast_SE_3333	GFRA1	0	0.9
Breast_SE_3334	GFRA1	190632	0.93
Breast_SE_3335	PNLIPRP3	0	0.96
Breast_SE_3336	PDZD8	41759	0.65
Breast_SE_3339	RAB11FIP2	2879	0.73
[truncated: 2,201 more rows]
