# Supplementary material for: Super-enhancer acquisition drives oncogene expression in triple negative breast cancer
Source: PLoS One. 2020 Jun 25;15(6):e0235343. doi: 10.1371/journal.pone.0235343 (PMC7316302; doi:10.1371/journal.pone.0235343)
Supplement: S5 Table — (XLSX) [file pone.0235343.s010.xlsx]

## Sheet: Sheet1
Table S5: Groups specific putative superenhancer associated genes
Group 1	Group 1-2 overlap	Group 2	Group 3	Group 4
LINC01342	SEMA3G	CX3CR1	FGD5P1	IRAK2
RNF223	FAM3D	SUCLG2	CSMD2-AS1	HRH1
CYP8B1	SNTN	MIR3921	MIR6825	GRIP2
ACKR2	MAGI1	CNBP	IL20RB	TMEM43
KIAA1522	GPR27	RPL32P3	IGF2BP2	BTD
FBXW12	FOXO6	CEP63	TM4SF19-AS1	RFTN1
SEMA3B-AS1	PPM1L	RBP1	SH3TC1	AZIN2
DOCK3	DVL3	RARRES1	LOC401127	ZKSCAN7
LOC101927296	TMEM125	ATP11B	TERT	WNT5A
SIDT1	ST6GAL1	EPHB3	IRX4	PTPRG-AS1
SMAP2	MRFAP1L1	PDZK1IP1	LINC01020	PRICKLE2-AS3
EEFSEC	LOC93622	RNU6-2	SLC30A5	MIR198
SLCO2A1	LINC01398	SFRP2	SGTB	COPB2
ECT2	OCLN	FHDC1	PLEKHG1	WWTR1
CLDN16	KDM3B	ACSL1	PDGFA	EIF5A2
HRASLS	PCDH1	MTRR	HOXA4	DGKG
MUC20	WWC1	PDE8B	CPA2	ATP13A3
CCDC149	NEURL1B	EFNA5	TBXAS1	TMEM44
RBM47	LINC01484	MIR3936	LOC101929294	FGFRL1
LIMCH1	LOC100128340	DDX46	SMIM19	HTRA3
RHOH	N4BP3	WWC1	IFNA8	C1orf185
CYP4Z2P	CORT	FOXI1	EQTN	BBS7
TTC39A-AS1	CASZ1	CREBRF	PLCH2	DCLK2
ELMOD2	RREB1	SYCP2L	MIR4673	ANKRD33B
MIR6075	LY6G6E	CD24	MIR4683	MYO10
SDHAP3	TULP1	WTAP	MIR1307	TRIO
SLC6A3	PRICKLE4	MIR3939	MIR609	C5orf34
MTMR12	CD24	ABCD3	MKI67	NNT
RANBP3L	AK9	ZNF736	SYT8	ZSWIM6
TTC23L	HECA	ELN	CLDN25	MAP1B
LOC100132356	ABCD3	RBM15	FEZ1	LHFPL2
CCNO	TRIL	MIR4469	LOC101927284	LINC01358
SETD9	CLDN4	PABPC1	AJUBA	TXNDC15
MAP3K1	REPIN1	RNF19A	PKP1	TGFBI
LOC101929719	MTUS1	VTCN1	LAD1	GNPDA1
FAM153B	TPD52	LOC101928087	PLEK2	ARAP3
BTNL9	TRIM45	MELK	SLC39A9	YIPF5
C1orf127	ESRP1	TMEM51-AS1	FLRT2	FGF1
MIR4639	GRHL2	KAZN	EHD4	ARSI
OR2B2	VTCN1	HDHD3	TMOD3	SMIM3
MIR7159	MAL2	C2CD4D	TM6SF1	SPARC
LOC101929243	EPPK1	S100A9	YOD1	EBF1
PACSIN1	PIP5K1B	KIAA1217	CHTF8	MIR146A
CLPSL2	RASEF	SVIL-AS1	TANGO6	UBLCP1
TREML3P	SEMA4D	AS3MT	MIR8058	ATP6V0E1
MAFK	TNFAIP8L2	RRM1	TRAPPC8	ADAMTS2
LOC100505938	CGN	IPO7	FHOD3	GFPT2
TMEM167B	LOC100132111	PBX1	ATP8B3	RBM24
CLDN3	RALGPS1	DEPDC7	ARHGEF16	PTGFR
C1orf194	MIR2861	ELF5	DFFB	LOC101929188
AMIGO1	LINC00963	HSD17B12	WTIP	MDGA1
TAS2R40	AIF1L	MTCH2	TGM6	RPL7L1
SSPO	CALML5	POU2F3	FOXA2	LINC01461
MNX1	NEBL	FOXRED1	MIRLET7BHG	HSP90AB1
DUSP4	CRABP2	TSPAN9	RHOB	COL12A1
ADHFE1	ARHGEF11	LRP6	SLC20A1	TMEM242
ESRP1	DLG5-AS1	LRMP	NT5DC4	PDGFA
LOC100288748	ATP1A4	ITGB7	POTEI	ZFAND2A
PLEKHF2	DCAF8	LOC100996664	CYBRD1	CHST12
NCALD	USP21	PADI1	ADAM23	RPL23P8
ANKRD46	PWWP2B	RCC2	SNORA7A	FAM126A
FBXO43	CRACR2B	CLMN	LOC653160	STK17A
SLC30A8	KRTAP5-AS1	DICER1	PLXNA1	NACAD
RHPN1	FAM180B	ALDH1A2	ARMC8	EGFR
EPPK1	VPS37C	SLTM	MIR548AQ	STX1A
SLC39A4	LOC101927495	LDHAL6B	TM4SF19	ZNF655
MLANA	CHRM1	C1orf186	USP17L10	SERPINE1
C9orf92	HRASLS2	C1orf116	RHOH	CSF1
ENHO	MARK2	GOLGA6C	MIR4277	CEP41
BNIPL	OVOL1	ARPIN	CTD-2194D22.4	ABCF2
GADD45G	BBS1	LRRK1	CTD-2297D10.2	PRKAG2
PCAT7	RHOD	SYT17	CCNB1	LOXL2
MIR1302-8	ALDH3B2	TMC5	TAF9	TACC1
KIF12	HSPB2-C11orf52	BRD7	PPP1R14C	ADAM9
C9orf106	TMPRSS13	CHTF8	FAM20C	ANK1
LOC401557	TIRAP	PPP2R5A	HOXA-AS3	NGF
SAPCD2	ST14	LOC101929541	HOXA7	PDP1
LRRC26	TSPAN9	CXCL16	CPA4	NACAP1
GATA3	PLEKHG6	GGT6	HIPK2	SLC25A32
USP6NL	KIAA0040	SNORA21	NKX2-6	TMEM75
RNU6-1	LOC100506125	KRT20	VDAC3	PVT1
COMMD3-BMI1	GPD1	KRTAP29-1	MIR31HG	ASAP1
LINC00845	FAIM2	YPEL2	LINC00032	PDCD1LG2
LOC101929234	METTL7A	SMIM5	GABRD	CD274
ZNF503-AS2	KRT83	SNHG22	SNHG7	ALDH1B1
DLG5	ZNF740	EIF3G	NOTCH1	CTSL
SFTPD	FAM222A	B3GNT3	FZD8	DNAJC25-GNG10
RBM20	P2RX4	RHPN2	COL17A1	DNAJC25
MIR4680	SMIM2-IT1	USF2	DOCK1	COL27A1
ARMS2	SOS2	PRR19	CTSD	TNC
KNDC1	SLC10A1	PRKD2	ANKK1	NEK6
KCNQ1	TTC9	MYH14	SLC37A2	OLFML2A
MIR8070	BATF	RALGAPA2	SOX21	ENG
LOC100147773	ELF3	EPB41L1	PRMT5	PTGES
SYT13	ESRRB	SLC35F3	CAMSAP2	NCS1
LOC221122	TC2N	WFDC10B	ACTN1	SARDH
VWCE	SLC25A47	SLC13A3	ADAM21P1	MIR3689C
ALDH3B2	BMF	B4GALT5	STON2	LOC101448202
TCIRG1	RHOV	CEBPB-AS1	MAPKBP1	MIR3689F
FGF3	PLEKHA6	BCAS1	MYO5A	MIR4669
LOC102724265	ZNF710	FAM209A	BNC1	PFKP
P2RY2	PRSS22	RBBP8NL	C1orf116	NMT2
P2RY6	PRSS27	LINC01132	SMPD3	VIM
STARD10	LOC388282	ARID4B	MIR7854	ZEB1
PGM2L1	PARD6A	MIS18A	DSC3	NRP1
TMEM45B	MIR6773	DONSON	GALNT1	RASSF4
CHD4	ESRP2	BRWD1-IT2	ADAMTSL5	SRGN
SLC11A2	MARVELD3	LINC00111	WRAP73	CHST3
SUOX	FA2H	MIR3198-1	UBA2	PLAU
TEDDM1	MIR1910	LOC100128531	SIRPB2	LINC00857
ADAM1A	DBNDD1	MB	NAPB	EIF5AL1
TESC-AS1	TLCD2	APOBEC3H	MIR3619	PPIF
BRI3BP	SNORD91A	TCF20	SDC1	DYDC2
RAB20	VMO1	POLDIP3	IL1A	CD1D
F7	LOC100287808	SHANK3	POTEE	OR10J5
ADCY4	KRT23	GRHL1	METTL8	ACTR1A
PADI2	ASB16	CLIP4	KLF7	NEURL1-AS1
MST1L	PRR15L	TACR1		LINC00601
TTC6	DLX3	LIMS3-LOC440895		DKK3
SLC25A21	MBTD1	BUB1		DBX1
KCNK13	CACNG1	RUFY4		BDNF
MOAP1	LLGL2	FEV		CREB3L1
SLC25A29	ZNF750	MYRIP		FOSL1
PPP1R13B	RAB40B	MAGI1		LRFN4
LINC00637	MYO5B	IMPG2		RELT
LOC100506747	H3F3A	HMCES		KCNE3
FMOD	SPINT2	H1FOO		CTSC
BRF1	CATSPERG	TF		MCAM
ARHGAP11A	LRFN1	ESYT3		ETS1
RHOV	MED29	IL12A-AS1		EPHA2
PLEKHA6	CEACAM6	MCCC1		RASSF8
FAM214A	CBFA2T2	VWA5B2		GNS
FEM1B	EPB41L1	STIL		CORO1C
UBL7-AS1	STAU1	RNU6-9		SH2B3
MIR29C	ZFP64	DCHS2		NOS1
WDR93	LOC101927932	FAM160A1		COL4A1
MAN2A2	DOPEY2	LINC01093		RASA3
DNASE1	LOC101930094	ANKRD33B		SNAPC1
DEXI	BCRP3	ZBED3		SHISA4
RMI2	AP1B1	FER		MEIS2
MKL2	OSM	RAD50		NUAK2
PDXDC1	MB	CATSPER3		FBN1
ZP2	GALR3	GABRP		SMAD3
PAX7	CBX7	SH3PXD2B		RPL4
LOC283856	CYP2D6	LINC00518		SNAPC5
MIR6773	RAP1GAP	SEC63		STOML1
CDH1	FLJ33534	SYNJ2-IT1		CYP11A1
BCO1	WDPCP	DACT2		MIR3174
SLC38A8	CNNM4	ARHGAP29		LOC100128108
MIR5093	LOC100506076	ZNF107		TMEM204
KLHL36	PSD4	CLDN4		CTF1
MIR1910	PTPN4	KCNC4		CBLN1
GSE1	PKP4	KAT6A		HERPUD1
FENDRR	UGT1A1	NACAP1		ST3GAL2
TRAPPC2L	RAB17	ANKRD46		MIR8058
CBFA2T3	RTP5	TRIM45		COTL1
APRT	TLR9	LY6D		PMP22
LOC101927727	KCTD6	SLC25A51		ADORA2B
OVCA2	MAGI1-IT1	DDI2		TGFB2-OT1
LOC100130950	PSMD6-AS2	ZNF618		ARHGAP23
POLDIP2	EBLN2	CGN		RPL23
GRB7	EDN2	S100A8		CNTNAP1
LRRC37A4P	IL12A-AS1	MIR603		FZD2
FAM117A	EPHB3	SVIL		DUSP10
EPN3	C1orf210	CYP17A1		COL1A1
TOB1	BCL6	NUP98		ITGA3
MSI2	KIAA0232	ST5		MILR1
EPX	TSPAN1	NUF2		SMURF2
MIR6080	SMA4	CSTF3		MXRA7
SLC16A6	SNORD63	APIP		TIMP2
SLC9A3R1	NME5	ACCS		RPTOR
LLGL2	LOC729080	AGBL2		ACTG1
TNRC6C-AS1	FOXI1	TRIM29		MRPL12
MIR4730	LOC100268168	LOC102724301		OGFOD3
CCDC40	LOC285593	ST3GAL4		MTCL1
CBX2	RMND5B	CACNA1C-IT3		GACAT2
C17orf62	DSP	MIR613		LINC01444
FEM1A	LY86-AS1	PRH2		LOC101927989
ARRDC5	LY6G6D	SMCO2		DPP9-AS1
TP73	TEAD3	ZNF740		PLIN3
MIR6792	C6orf132	ZFP36L1		MIR5695
EPHX3	OSTM1-AS1	MST1P2		SYDE1
NR2F6	C6orf203	CROCC		TPM4
IFI30	PPIL6	MIR2116		AXL
CEBPA	FIG4	LOC101928725		GALNT2
CHST8	ABRACL	AQP9		PRNP
CEBPG	FNBP1L	AVPR1B		APMAP
CATSPERG	DPY19L2P3	IL20		HM13
SIPA1L3	CLDN3	NEIL1		POFUT1
MED29	ATP6V0E2	WDR93		MYL9
CEACAM3	MIR548V	LOC101927751		TGM2
CEACAM22P	SLC10A5	PAPD5		SERINC3
ZNF296	LOC101929099	CDH3		LINC01273
PPP1R37	PLEKHF2	ANGEL2		POFUT2
TRAPPC6A	FBXO43	ZMYND15		LOC100129027
SLC8A2	FLJ42969	VMO1		COL18A1
SULT2B1	SAMD12-AS1	CACNB1		COL6A1
ZNF473	FAM83H-AS1	KRT23		COL6A2
SNRPD2P2	PRKACG	KRT33A		B3GALNT2
PLCB4	GKAP1	MIR454		TCN2
DEFB121	MIR3153	SMIM6		PES1
E2F1	VPS72	SCARNA17		LGALS1
PHF20	RORC	PPAN		APOBEC3C
WFDC3	C2CD4D	ARRDC2		KIAA0930
SLMO2-ATP5E	GARNL3	WDR88		SPANXB1
SS18L1	FAM102A	MAG		HPCAL1
MIR6813	C9orf106	PAFAH1B3		HS1BP3
LINC00189	ASS1	ZC3H4		FNDC4
HLCS	TUBAL3	VRK3		MRPL33
SLC19A1	NEBL-AS1	INSM1		FOSL2
LGALS8-AS1	HAPLN2	LOC100130373		LUZP1
RASL10A	IQGAP3	KCNK1		MCFD2
ASCC2	DLG5	UBE2C		TMEM247
SLC5A4	IGSF9	EYA2		LINC01119
MIR4766	PPOX	MIR645		CCDC88A
CSDC2	ARHGAP30	LINC01271		MAP4K4
PRR5-ARHGAP8	C10orf91	CYP24A1		ERCC3
IL17REL	MUC5B	FAM209B		GYPC
BCOR	KRTAP5-2	OGFR-AS1		ZEB2
GPC4	FNBP4	TBCE		VAMP3
SH3YL1	CD5	HUNK		FN1
TPO	SYT7	LOC100506403		SNORA73B
ID2-AS1	SNORD27	HMGN1		DOCK10
TTC32	OVOL1-AS1	MIR3197		USP40
LOC101928222	RBM14	TMPRSS3		COL6A3
NT5C1B	TBC1D10C	SLC25A18		ASB1
DYNC2LI1	TBX10	MIR6817		GPC1
ZNF436	C11orf52	GUCD1		MIR3133
ASAP3	TMPRSS4-AS1	RASD2		EMC3
ATP6V1E2	FOXRED1	SNORD83B		PPARG
SPRED2	ARHGAP32	OGFRP1		SYN2
TET3	NRIP2	PACSIN2		TIMP4
TMEM150A	SCNN1A	KLHDC7B		FBLN2
FAM95A	TNR	C2orf48		GALNT15
PTPN4	ADCY6	SNORD53		PHC2
SLC38A11	RACGAP1	HK2		ZNF501
FAM126B	NR4A1	LIMS3		SPATA12
ZFAND2B	CSAD	ZC3H8		PTPRG
LOC101928881	C12orf76	DIRC3		PRICKLE2
EFHD1	MORN3	TTLL4		FSTL1
MIR6811	LINC00284			MRPS22
LOC100288175	NEMF			TM4SF1
KLHL40	DCAF5			SLC2A2
TRIM62	LOC101928075			IGF2BP2
SPINK8	RPS6KL1			MB21D2
TUSC2	PPP1R12B			XXYLT1
CISH	RPS10P7			LINC00884
RYBP	PTPRVP			SPON2
GRAMD1C	CIPC			SH3TC1
TMCO2	CCDC88C			OSBPL9
LOC90246	ITPK1			ANXA5
RAB6B	DEGS2			PRSS48
TNIK	PAK6			CMBL
LPP-AS2	MRPL42P5			NNT-AS1
FGF12	SPINT1			NDUFAF2
LINC00885	PIK3C2B			ZNF366
SLC34A2	ZNF774			TNPO1
LINC00853	LOC101929613			ARSB
TTC39A	MMP15			JUN
ELF2	AGRP			CAMLG
LPCAT1	CDH1			SPOCK1
MIR4635	PHLPP2			PCDHGC4
LINC01511	CTRB2			KIAA0141
NPR3	GSE1			NR3C1
LMBRD2	SPIRE2			CD74
NIM1K	MIR212			HMGXB3
PDE4D	GGT6			TNIP1
CXXC5	SRCIN1			ADAM19
CPEB4	KRT40			NKX2-5
OR2V1	ASB16-AS1			CANX
CASZ1	LRRC46			AACSP1
LOC100130357	FAM117A			SQSTM1
HIST1H2BN	TOB1-AS1			CAP2
UQCC2	CACNG4			DNAJB4
SPDEF	MYO15B			CUTA
MAPK13	MIR4525			RNF8
TREM1	SNHG22			TRERF1
TMEM184A	ZNF678			IFI44
LOC101927391	SIPA1L3			SUPT3H
FNDC7	CCER2			KCNQ5
ABHD11	PAK4			SYNJ2
KIAA1324	CEACAM3			FAM20C
PSMA5	E2F1			MAD1L1
TRPV6	PHF20			TWISTNB
ATP6V0E2	RNF114			IL6
MNX1-AS1	ATP9A			DBNL
LOC101929470	TUBB1			CCM2
LINC00967	TTC3-AS1			EGFR-AS1
NDUFAF6	SLC37A1			SUMF2
GRHL2	POM121L10P			EIF4H
FLJ42969	RASL10A			FAM200A
TRPS1	KIAA1656			PLOD3
RHPN1-AS1	RASD2			LOC102724094
FAM83H-AS1	MIR659			LINC01007
MIR6893	SYNGR1			AMPD2
ERMP1	PDGFB			CPA4
TYRP1	LOC101929829			NUB1
DNAI1	NBPF3			WDR86
ANXA9	C2orf50			LOC100507156
SEMA4D	PEX13			TM2D2
FBP1	CNNM3			AP3M2
GABBR2	CBWD2			CD58
HDHD3	INHBB			TMEM67
LINC00963	DAPL1			MIR7705
FCN2	UGT1A3			ATP6V1C1
NPDC1	RBM44			MIR1206
MIR3621	LINC01237			CASC8
GATA3-AS1				LINC00824
SFMBT2				INSL4
LOC101928453				TOMM5
BMI1				CDK20
CCDC6				GNG10
CAMK2G				SLC31A2
ZNF503				SNORA65
DLG5-AS1				NTMT1
TMEM254				ADAMTSL2
DUSP5				COL5A1
TACC2				KLF6
LRRC27				FAM171A1
ASCL2				VIM-AS1
ZBED5-AS1				NCOA4
PBX1				DDX21
DKFZp779M0652				MCU
C11orf94				C10orf55
PGA5				SFTPA1
TBX10				MBL1P
MIR6753				CD1C
MRGPRF-AS1				CD1A
LOC100287896				ATP1A2
ST14				TRIM8
ZNF384				INA
GALNT6				DOCK1
ERBB3				MICAL2
LINC00272				HTATIP2
ATXN2				BDNF-AS
C12orf49				MIR3160-1
MIR5188				DRAP1
LOC101060553				POLD4
TMCO3				ARAP1
RIPK3				NEU3
PADI3				TMEM126A
FOXA1				ABCG4
TC2N				C11orf45
CHGA				NECAP2
DEGS2				BCAT1
BTG2				AVPR1A
TMEM183A				SELPLG
TEX22				MYL2
GOLGA8K				MAP1LC3B2
SPINT1				COL4A2
SOX13				TMEM255B
MYO5C				HIF1A
LINC00593				FLJ22447
MIR4513				TIMM17A
CD46				NAV1
ZNF774				C15orf41
FAM174B				SLC41A1
NAA60				LINC01491
TEKT5				LCTL
PARN				MAP2K1
MPV17L				REC114
ANKS4B				ANPEP
KLHDC7A				FAM138E
BBS2				MSRB1
ESRP2				BCKDK
DYNLRB2				ANKRD26P1
ATP2C2				MT1A
LOC101927793				HYDIN
CDT1				LOC101928417
RPH3AL				TLDC1
DPH1				TRIM16
SLC52A1				TRPV2
SLC13A2				TGFB2
PGAP3				LASP1
ARHGAP27				STAT5B
DLX3				EFTUD2
TOB1-AS1				HLX
MTVR2				LRRC59
RNF43				EME1
MIR3064				SPHK1
LINC00674				SEC14L1
CD300LB				SOCS3
HID1				LGALS3BP
UNC13D				C1QTNF1
SYNGR2				NPTX1
CARD14				ARL16
TEX19				MIR6786
PTPRS				B3GNTL1
LINC01134				LINC01443
CAMSAP3				ZNF516
CASP14				C19orf70
CPAMD8				CALR
B3GNT3				EPHX3
CEBPA-AS1				AKAP8
FAM98C				OR7C1
LRFN1				OR10H4
DMRTC2				TGFB1
CEACAM16				ABCB10
MIR4531				LINC01433
NAPA				SMOX
SPACA4				ENTPD6
MYH14				LINC00028
CAPN9				FOXS1
SLX4IP				DSN1
DEFB122				TTI1
NECAB3				FITM2
EPB41L1				TTPAL
PCIF1				PTPN1
PPP1R3D				LINC00163
RBBP8NL				MIR6815
SAMD10				PCBP3
CLDN8				LOC101928796
DOPEY2				NID1
FTCD				SEC14L6
LGALS8				MTFP1
XBP1				CYTH4
OSM				APOBEC3G
RFPL3				SAMM50
EP300-AS1				ATP11C
ARHGAP8				ODC1
DENND6B				WDR35
CASK				LOC100505736
FRMD7				CLIP4
LINC01250				RPL11
GRHL1				RHOQ
RHOB				LINC01118
APOB				SOCS5
MTA3				MIR4426
TCEA3				EFEMP1
EPCAM				NPAS2
LOC339807				AMMECR1L
DCTN1-AS1				LIMS2
ST3GAL5-AS1				TEX41
PROM2				UTS2
INHBB				RPL37A
LOC101929633				RCC1
CFLAR-AS1				RHBDD1
LOC100129175				DGKD
CHRNG				RAMP1
ALPP				COPS8
MLPH				SCLY
				MIR4441
				LOC285191
