# Supplementary material for: Super-enhancer acquisition drives oncogene expression in triple negative breast cancer
Source: PLoS One. 2020 Jun 25;15(6):e0235343. doi: 10.1371/journal.pone.0235343 (PMC7316302; doi:10.1371/journal.pone.0235343)
Supplement: S6 Table — (XLSX) [file pone.0235343.s011.xlsx]

## Sheet: Sheet1
Table S6: Putative tumor-specific SE driven genes for CRISPR screen
Gene
ABTB2
ADAM12
ADAMTS2
ADORA2A
ADPRH
AHCYL1
AIF1L
AKAP10
ALDH3B2
ALDH4A1
ALX3
ANXA11
AP1B1
APOBR
ARHGAP31
ARHGAP32
ARHGAP8
ARID5B
ARRB1
ASCL2
ASS1
ATF3
ATG101
ATOH8
ATP9A
AZGP1
BACE2
BAHD1
BAMBI
BATF
BCDIN3D
BCL2L13
BCOR
BID
BMF
BMP4
BOC
BPGM
BTG2
C2CD4C
C2CD4D
CA4
CABLES1
CALD1
CALM1
CAMSAP3
CAPN9
CARKD
CASKIN2
CBR1
CBS
CBX2
CBX8
CCDC101
CCDC124
CCDC125
CCDC40
CCND1
CEBPA
CELSR2
CGN
CHCHD2
CHKA
CHST12
CHST8
CLIC4
CLN3
CLPTM1L
CLTC
CNNM3
CNNM4
COL15A1
COL6A1
COL6A2
COL6A3
COPS8
COQ2
COQ9
CP
CRISPLD2
CRYBA2
CX3CL1
CXCL16
CYB561
CYR61
DCAF5
DDAH1
DDX3X
DEGS1
DHRS3
DLX3
DNMT3L
DOPEY2
DTX4
DUSP15
DUSP8
E2F1
EDIL3
EEFSEC
EFCAB11
EFHD1
EGFR
ELF3
EN1
EPCAM
EPHB2
EPHB3
EPS8L1
ERMP1
ESRP1
FAF1
FAIM2
FAM117A
FAM132B
FAM174B
FAM198A
FAM217B
FAM46A
FAM47E
FBLN2
FBXO28
FIBCD1
FOXA1
FOXI1
FOXJ1
FOXP4
FOXS1
FUT8
GABRP
GADD45G
GAL3ST2
GALNT12
GALNT6
GATA2
GDPD5
GFOD1
GGT1
GGT6
GJC3
GLYATL1
GOLGA5
GOLPH3
GOLT1A
GPR124
GPR19
GPRC5C
GPRIN2
GRHL1
GRTP1
GSTM4
GUCD1 (C22orf13)
H3F3B
HDAC11
HEATR6
HEG1
HMCES(C3orf37 0.38)
HNRNPAB
HOXD1
HOXD11
HOXD3
HOXD4
HRASLS2
HS6ST1
ID2
IGFBP5
IL27
IL34
INHBB
INPP5J
INSL3
IQCC
ITGA11
ITGB5
JAK3
JDP2
KCNC4
KCNJ12
KCNJ18
KCNK5
KCNQ1
KIAA0196
KIAA0513
KIAA1324
KIF12
KLHDC7A
KSR1
LANCL2
LCTL
LDHD
LIMCH1
LINGO1
LLGL2
LOH12CR1
LPCAT1
LRRC16A
LRRC75B
LY6E
MAD1L1
MAFB
MAP2K3
MAP3K1
MAP3K1
MAP3K8
MAPKAPK2
MAPKAPK5
MARCKSL1
MAST3
MB
MCF2L
MIF4GD
MPV17L2
MRPS17
MSX2
MTCL1
MTMR12
MTSS1L
N4BP3
NATD1
NBPF3
NDUFB9
NECAB3
NELFCD
NFKBIZ
NINJ1
NR4A1
NSMCE2
NUAK1
NUPR1
OCLN
PACSIN1
PATZ1
PAX9
PBX1
PDCD4
PDE9A
PDGFRB
PDS5A
PEX13
PGAM5
PGLS
PHKG1
PIK3C2B
PIM1
PKIG
PLAC8
PLEKHA6
PLEKHA7
PLEKHF2
PLEKHH1
PLXND1
PODXL
PPAP2C
PPFIBP2
PPIF
PPIL1
PPM1L
PPP1R3D
PPP2R5A
PROC
PRODH
PRR14L
PRR5
PRSS35
PSPH
PTPN4
PTPRJ
PXMP2
QRFP
RAB11FIP1
RAB20
RABEP1
RAD51B
RAP1GAP
RARRES1
RARRES3
RASD2
RASSF5
RBM38
RDH13
REPIN1
RHPN2
RMND5B
RNF139
RNF144A
RPS6KA5
RPS6KB1
RSPH1
RSRC1
RTKN2
RUNX3
SALL4
SAYSD1
SBK1
SEC61G
SERINC3
SERPINB1
SERPINB9
SHROOM3
SIDT1
SIM2
SIRT5
SIX1
SLC12A7
SLC12A8
SLC25A21
SLC2A10
SLC37A1
SLC9A3R1
SMAD6
SMAGP
SMARCD2
SMEK1
SOX11
SOX13
SPDEF
SPICE1
SPTSSB
SQLE
SRCIN1
ST14
STRA6
STXBP2
SULT1A1
SULT1A2
SUMF2
SYCP2
SYK
SYNGR2
SYNPO
SYT15
SYT17
TATDN1
TBC1D16
TC2N
TDRKH
TEX36
TGFB2
THEM5
TMC5
TMC6
TMEM11
TMEM116
TMEM241
TMEM65
TMPRSS2
TNFAIP2
TNS3
TOX2
TP53I11
TPD52L1
TPM1
TPPP
TPRG1
TRAFD1
TRIB1
TRIM2
TRMT12
TRPS1
TTC3
TTC39A
TTC6
TUBD1
UBL7
UMODL1
UNC13A
UNK
UPP1
USP22
USP32
USP34
VIPR1
VMP1
VOPP1
VPS37C
VTN
WDHD1
WDR52
WNT10A
WWC1
XBP1
ZBTB21
ZBTB8A
ZCCHC24
ZDHHC23
ZHX2
ZIC1
ZIC4
ZMYND15
ZNF148
ZNF713
ZNRF1
