# Supplementary material for: Super-enhancer acquisition drives oncogene expression in triple negative breast cancer
Source: PLoS One. 2020 Jun 25;15(6):e0235343. doi: 10.1371/journal.pone.0235343 (PMC7316302; doi:10.1371/journal.pone.0235343)
Supplement: S7 Table — (XLSX) [file pone.0235343.s012.xlsx]

## Sheet: HCC38
Gene	Type	HCC38 Log fold-change	HCC38 LFC rescaled	HCC38 drop-out rank
RPL23	Positive control	-9.15746	-1.01267	1
RPL11	Positive control	-8.37549	-1.01239	2
EEF2	Positive control	-7.76207	-1.01204	3
EEFSEC	SE associated gene	-7.56224	-1.01189	4
EIF3A	Positive control	-6.81818	-1.0111	5
WEE1	Positive control	-6.81583	-1.0111	6
BRD2	epi genes	-6.64403	-1.01085	7
CCT3	Positive control	-6.47568	-1.01058	8
MYC	Positive control	-6.2927	-1.01025	9
COPS8	SE associated gene	-6.2453	-1.01015	10
WDHD1	SE associated gene	-6.22935	-1.01012	11
NUF2	Positive control	-6.17366	-1.01001	12
CDK9	epi genes	-6.17104	-1.01	13
PSMB2	Positive control	-6.11189	-1.00987	14
EIF3D	Positive control	-6.05515	-1.00974	15
CCT8	Positive control	-5.90213	-1.00937	16
USP39	Positive control	-5.86397	-1.00928	17
CCT7	Positive control	-5.78498	-1.00906	18
CCND1	SE associated gene	-5.73529	-1.00892	19
HDAC3	epi genes	-5.70864	-1.00885	20
BRCA1	Positive control	-5.22434	-1.00717	21
CDK1	Positive control	-5.18682	-1.00701	22
PSMD1	Positive control	-5.07218	-1.00652	23
MCL1	Positive control	-4.89376	-1.00566	24
RPL10A	Positive control	-4.87531	-1.00556	25
NDUFB9	SE associated gene	-4.69571	-1.00457	26
WWTR1	Positive control	-4.46024	-1.00307	27
SUZ12	epi genes	-4.14444	-1.00064	28
MED1	epi genes	-4.09849	-1.00024	29
ATM	Positive control	-4.08136	-1.00009	30
CTCF	epi genes	-3.96456	-0.998997	31
RPL36	Positive control	-3.96109	-0.998963	32
THEM5	SE associated gene	-3.3963	-0.992258	33
TUBD1	SE associated gene	-3.36294	-0.991775	34
EIF3G	Positive control	-3.05046	-0.986674	35
CYR61	SE associated gene	-2.84146	-0.982605	36
MARCKSL1	SE associated gene	-2.80647	-0.981865	37
MAPK1	Positive control	-2.64804	-0.978288	38
GPRIN2	SE associated gene	-2.61169	-0.977411	39
NSMCE2	SE associated gene	-2.58707	-0.976805	40
PPIF	SE associated gene	-2.58237	-0.976689	41
MTOR	Positive control	-2.49409	-0.974424	42
EIF3B	Positive control	-2.47326	-0.97387	43
ERMP1	SE associated gene	-2.46465	-0.973638	44
RAD51B	SE associated gene	-2.43973	-0.972961	45
CLTC	SE associated gene	-2.37741	-0.971217	46
PGLS	SE associated gene	-2.2865	-0.968537	47
BID	SE associated gene	-2.18235	-0.965258	48
CDK7	epi genes	-2.15313	-0.964297	49
MRPS17	SE associated gene	-2.14639	-0.964072	50
MPV17L2	SE associated gene	-2.121	-0.963217	51
DDX3X	SE associated gene	-2.06653	-0.961333	52
PHKG1	SE associated gene	-2.03909	-0.960358	53
AHCYL1	SE associated gene	-1.95142	-0.95712	54
KDM5A	epi genes	-1.85294	-0.953249	55
HDAC11	SE associated gene	-1.70484	-0.946929	56
LANCL2	SE associated gene	-1.5733	-0.940772	57
VMP1	SE associated gene	-1.41811	-0.932786	58
KDM2A	epi genes	-1.35487	-0.929292	59
PODXL	SE associated gene	-1.35211	-0.929137	60
SIX1	SE associated gene	-1.2842	-0.925213	61
MAD1L1	SE associated gene	-1.18085	-0.918897	62
CA4	SE associated gene	-1.16837	-0.918105	63
IGFBP5	SE associated gene	-1.04446	-0.909887	64
EP300	epi genes	-1.04405	-0.909858	65
HS6ST1	SE associated gene	-0.98445	-0.905664	66
LLGL2	SE associated gene	-0.95658	-0.903647	67
MAP3K1	SE associated gene	-0.901741	-0.899571	68
MAP3K1	SE associated gene	-0.901741	-0.899571	68
KCNC4	SE associated gene	-0.840429	-0.89484	70
SMEK1	SE associated gene	-0.821836	-0.893369	71
GGT6	SE associated gene	-0.784304	-0.890345	72
SEC61G	SE associated gene	-0.770413	-0.889207	73
PLK1	Positive control	-0.769668	-0.889145	74
HEATR6	SE associated gene	-0.659789	-0.879779	75
STRA6	SE associated gene	-0.627585	-0.876908	76
QRFP	SE associated gene	-0.617605	-0.876007	77
LRRC75B	SE associated gene	-0.611068	-0.875413	78
CELSR2	SE associated gene	-0.554602	-0.870182	79
SQLE	SE associated gene	-0.527671	-0.867622	80
NRAS	Positive control	-0.522637	-0.867138	81
BRCA2	Positive control	-0.505612	-0.865492	82
EFHD1	SE associated gene	-0.483677	-0.863344	83
IQCC	SE associated gene	-0.47466	-0.862453	84
BAMBI	SE associated gene	-0.465065	-0.861499	85
PDS5A	SE associated gene	-0.447572	-0.859745	86
KIAA1324	SE associated gene	-0.438978	-0.858876	87
SYT15	SE associated gene	-0.426946	-0.857652	88
BCDIN3D	SE associated gene	-0.42225	-0.857172	89
ESRP1	SE associated gene	-0.399396	-0.854814	90
KDM3B	epi genes	-0.397429	-0.85461	91
COQ2	SE associated gene	-0.385326	-0.853346	92
USP32	SE associated gene	-0.37186	-0.851929	93
VOPP1	SE associated gene	-0.341692	-0.848711	94
AKAP10	SE associated gene	-0.332221	-0.847688	95
ABTB2	SE associated gene	-0.330049	-0.847453	96
HOXD1	SE associated gene	-0.310107	-0.845277	97
HMCES(C3orf37 0.38)	SE associated gene	-0.307004	-0.844936	98
SYK	SE associated gene	-0.296615	-0.84379	99
MTSS1L	SE associated gene	-0.271187	-0.840952	100
KAT6A	epi genes	-0.268035	-0.840598	101
ASS1	SE associated gene	-0.254044	-0.839014	102
DDAH1	SE associated gene	-0.251676	-0.838745	103
FBLN2	SE associated gene	-0.241616	-0.837597	104
AIF1L	SE associated gene	-0.23416	-0.836741	105
PPFIBP2	SE associated gene	-0.233477	-0.836662	106
HOXD11	SE associated gene	-0.229305	-0.836181	107
CEBPA	SE associated gene	-0.215714	-0.834607	108
SIM2	SE associated gene	-0.205686	-0.833436	109
ATF3	SE associated gene	-0.193999	-0.832063	110
FOXA1	SE associated gene	-0.173926	-0.829682	111
GPR19	SE associated gene	-0.136273	-0.825136	112
RDH13	SE associated gene	-0.115817	-0.822622	113
TRIB1	SE associated gene	-0.114786	-0.822494	114
H3F3B	SE associated gene	-0.0548576	-0.814943	115
FAM132B	SE associated gene	-0.0520475	-0.814582	116
LCTL	SE associated gene	-0.0313767	-0.811908	117
KMT2A	epi genes	-0.0174381	-0.810087	118
DNMT1	epi genes	0.0279506	-0.804048	119
SMARCD2	SE associated gene	0.030014	-0.803769	120
VTN	SE associated gene	0.0403482	-0.80237	121
KSR1	SE associated gene	0.0487895	-0.80122	122
ZCCHC24	SE associated gene	0.0488714	-0.801208	123
RUNX3	SE associated gene	0.07221	-0.797999	124
SLC2A10	SE associated gene	0.0737714	-0.797782	125
TWIST2	epi genes	0.0789367	-0.797065	126
KDM1B	epi genes	0.088583	-0.79572	127
FAIM2	SE associated gene	0.0914163	-0.795324	128
ADAM12	SE associated gene	0.0954514	-0.794758	129
KCNJ12	SE associated gene	0.0986016	-0.794315	130
RNF139	SE associated gene	0.112959	-0.792286	131
PEX13	SE associated gene	0.115456	-0.791932	132
TPPP	SE associated gene	0.11627	-0.791816	133
TPM1	SE associated gene	0.118233	-0.791537	134
NBPF3	SE associated gene	0.126747	-0.790322	135
TP53	Positive control	0.136497	-0.788923	136
PPAP2C	SE associated gene	0.143331	-0.787938	137
EGFR	SE associated gene	0.148742	-0.787155	138
FAM117A	SE associated gene	0.150602	-0.786885	139
RHPN2	SE associated gene	0.166169	-0.784616	140
ITGB5	SE associated gene	0.193149	-0.780633	141
GPR124	SE associated gene	0.197186	-0.780031	142
KARS	Positive control	0.233618	-0.774539	143
BTG2	SE associated gene	0.244012	-0.77295	144
KDM4B	epi genes	0.249013	-0.772182	145
TTC39A	SE associated gene	0.28674	-0.766316	146
PDE9A	SE associated gene	0.29188	-0.765507	147
CABLES1	SE associated gene	0.293544	-0.765245	148
BAHD1	SE associated gene	0.300779	-0.7641	149
GATA2	SE associated gene	0.306299	-0.763224	150
PATZ1	SE associated gene	0.334326	-0.758731	151
ZHX2	SE associated gene	0.335467	-0.758547	152
TNS3	SE associated gene	0.351156	-0.755998	153
TEX36	SE associated gene	0.366928	-0.753412	154
SOX11	SE associated gene	0.37279	-0.752444	155
SBK1	SE associated gene	0.380593	-0.751152	156
NUAK1	SE associated gene	0.380802	-0.751117	157
SLC9A3R1	SE associated gene	0.381017	-0.751082	158
SUMF2	SE associated gene	0.395764	-0.748622	159
BACE2	SE associated gene	0.410285	-0.74618	160
SYNGR2	SE associated gene	0.415239	-0.745342	161
GJC3	SE associated gene	0.417137	-0.745021	162
MAST3	SE associated gene	0.437843	-0.741489	163
TMEM65	SE associated gene	0.444467	-0.74035	164
CCDC40	SE associated gene	0.450597	-0.739293	165
CLIC4	SE associated gene	0.46785	-0.736296	166
CBX2	SE associated gene	0.474315	-0.735165	167
HNRNPAB	SE associated gene	0.475749	-0.734914	168
ZNF713	SE associated gene	0.485046	-0.733279	169
DHRS3	SE associated gene	0.496476	-0.731258	170
KIAA0513	SE associated gene	0.500938	-0.730465	171
BATF	SE associated gene	0.517282	-0.727544	172
PLAC8	SE associated gene	0.536022	-0.724161	173
DOT1L	epi genes	0.545132	-0.722504	174
RASD2	SE associated gene	0.546663	-0.722224	175
TRMT12	SE associated gene	0.552461	-0.721164	176
RAB11FIP1	SE associated gene	0.553519	-0.72097	177
CHCHD2	SE associated gene	0.571139	-0.717725	178
EPHB3	SE associated gene	0.571506	-0.717657	179
DLX3	SE associated gene	0.576084	-0.716808	180
UBL7	SE associated gene	0.580804	-0.715931	181
PRSS35	SE associated gene	0.582716	-0.715575	182
USP34	SE associated gene	0.601643	-0.712029	183
GALNT6	SE associated gene	0.601897	-0.711981	184
PRODH	SE associated gene	0.610276	-0.710399	185
PDGFRB	SE associated gene	0.636186	-0.70546	186
PDCD4	SE associated gene	0.637795	-0.705151	187
PAX9	SE associated gene	0.644704	-0.703821	188
LINGO1	SE associated gene	0.653556	-0.702109	189
ALDH3B2	SE associated gene	0.658711	-0.701108	190
KDM4C	epi genes	0.660225	-0.700813	191
SRC	Positive control	0.665946	-0.699698	192
KAT2A	epi genes	0.670895	-0.698731	193
ZBTB8A	SE associated gene	0.674699	-0.697985	194
CYB561	SE associated gene	0.696332	-0.693715	195
ELF3	SE associated gene	0.700915	-0.692804	196
RARRES3	SE associated gene	0.714338	-0.690122	197
DCAF5	SE associated gene	0.720138	-0.688957	198
KAT5	epi genes	0.724038	-0.688171	199
ATOH8	SE associated gene	0.724119	-0.688155	200
STXBP2	SE associated gene	0.724224	-0.688134	201
PLEKHH1	SE associated gene	0.727793	-0.687413	202
TWIST1	epi genes	0.732158	-0.68653	203
JDP2	SE associated gene	0.735073	-0.685939	204
ABL1	Positive control	0.749864	-0.682926	205
HOXD4	SE associated gene	0.75105	-0.682684	206
RB1	Positive control	0.77812	-0.677102	207
LDHD	SE associated gene	0.782068	-0.676281	208
E2F1	SE associated gene	0.782692	-0.676151	209
CHST8	SE associated gene	0.786843	-0.675285	210
MTMR12	SE associated gene	0.791677	-0.674275	211
EPCAM	SE associated gene	0.796728	-0.673216	212
ITGA11	SE associated gene	0.80283	-0.671934	213
PTPRJ	SE associated gene	0.81975	-0.668354	214
GADD45G	SE associated gene	0.821983	-0.667879	215
KDM1A	epi genes	0.823052	-0.667652	216
TGFB2	SE associated gene	0.827481	-0.666708	217
ZEB1	epi genes	0.835414	-0.665011	218
BOC	SE associated gene	0.867751	-0.658018	219
RAP1GAP	SE associated gene	0.870513	-0.657415	220
PPIL1	SE associated gene	0.878002	-0.655775	221
UNK	SE associated gene	0.880811	-0.655159	222
BCL2	Positive control	0.881514	-0.655004	223
FOXS1	SE associated gene	0.892604	-0.65256	224
RASSF5	SE associated gene	0.894108	-0.652227	225
NATD1	SE associated gene	0.911738	-0.648307	226
TRAFD1	SE associated gene	0.913007	-0.648023	227
RARRES1	SE associated gene	0.919383	-0.646596	228
ZNF148	SE associated gene	0.92043	-0.646361	229
RPS6KA5	SE associated gene	0.97414	-0.634131	230
GSTM4	SE associated gene	0.97546	-0.633826	231
ARHGAP8	SE associated gene	0.977236	-0.633415	232
INSL3	SE associated gene	0.985907	-0.631404	233
EFCAB11	SE associated gene	0.988926	-0.630702	234
MTCL1	SE associated gene	0.99517	-0.629246	235
CRYBA2	SE associated gene	1.00813	-0.626207	236
TPRG1	SE associated gene	1.01547	-0.624479	237
SALL4	SE associated gene	1.01717	-0.624077	238
BCL2L13	SE associated gene	1.02274	-0.622758	239
CTNNB1	Positive control	1.0251	-0.622197	240
SRCIN1	SE associated gene	1.02575	-0.622043	241
GUCD1 (C22orf13)	SE associated gene	1.03303	-0.620313	242
GLYATL1	SE associated gene	1.03304	-0.62031	243
ZIC1	SE associated gene	1.03791	-0.619148	244
CCDC125	SE associated gene	1.0549	-0.61507	245
COL6A2	SE associated gene	1.06354	-0.612982	246
MAP2K3	SE associated gene	1.06504	-0.61262	247
CLPTM1L	SE associated gene	1.08558	-0.607613	248
KCNQ1	SE associated gene	1.08686	-0.6073	249
KDM4A	epi genes	1.0869	-0.607291	250
BPGM	SE associated gene	1.09003	-0.606523	251
N4BP3	SE associated gene	1.09342	-0.605689	252
TMEM241	SE associated gene	1.09464	-0.605389	253
WWC1	SE associated gene	1.09817	-0.604519	254
ADORA2A	SE associated gene	1.10033	-0.603986	255
MIF4GD	SE associated gene	1.10759	-0.60219	256
WHSC1	epi genes	1.11165	-0.601182	257
TOX2	SE associated gene	1.11413	-0.600567	258
FAM198A	SE associated gene	1.11549	-0.600229	259
TRPS1	SE associated gene	1.11594	-0.600117	260
COL15A1	SE associated gene	1.12313	-0.598323	261
GRHL1	SE associated gene	1.16574	-0.587559	262
GDPD5	SE associated gene	1.16825	-0.586918	263
ASCL2	SE associated gene	1.17111	-0.586186	264
SLC12A8	SE associated gene	1.17419	-0.585396	265
MCF2L	SE associated gene	1.1787	-0.584237	266
SERPINB9	SE associated gene	1.17932	-0.584077	267
CAPN9	SE associated gene	1.18067	-0.583732	268
EED	epi genes	1.18268	-0.583212	269
CP	SE associated gene	1.19408	-0.580268	270
TMEM11	SE associated gene	1.19483	-0.580074	271
CX3CL1	SE associated gene	1.19655	-0.579627	272
EPS8L1	SE associated gene	1.20218	-0.578163	273
GALNT12	SE associated gene	1.2218	-0.573031	274
ADPRH	SE associated gene	1.22401	-0.57245	275
CBX8	SE associated gene	1.23733	-0.568933	276
COL6A1	SE associated gene	1.23788	-0.568788	277
FAM174B	SE associated gene	1.23945	-0.56837	278
KCNK5	SE associated gene	1.24065	-0.568054	279
NELFCD	SE associated gene	1.24447	-0.567038	280
KIAA0196	SE associated gene	1.24686	-0.566402	281
LPCAT1	SE associated gene	1.248	-0.566099	282
ADAMTS2	SE associated gene	1.25114	-0.565262	283
AZGP1	SE associated gene	1.25742	-0.563584	284
CALD1	SE associated gene	1.26037	-0.562793	285
SMAD6	SE associated gene	1.2614	-0.562515	286
ANXA11	SE associated gene	1.26289	-0.562116	287
RABEP1	SE associated gene	1.26297	-0.562095	288
RSPH1	SE associated gene	1.27089	-0.559965	289
CAMSAP3	SE associated gene	1.27587	-0.558622	290
GFOD1	SE associated gene	1.28222	-0.556903	291
TTC3	SE associated gene	1.28757	-0.555449	292
MSX2	SE associated gene	1.30585	-0.550458	293
INPP5J	SE associated gene	1.30589	-0.550447	294
PLXND1	SE associated gene	1.30758	-0.549985	295
PIK3C2B	SE associated gene	1.31732	-0.547304	296
ZMYND15	SE associated gene	1.32142	-0.54617	297
JAK3	SE associated gene	1.32477	-0.545244	298
RBM38	SE associated gene	1.327	-0.544625	299
LOH12CR1	SE associated gene	1.33461	-0.542512	300
ZNRF1	SE associated gene	1.33706	-0.541829	301
HOXD3	SE associated gene	1.34216	-0.540406	302
IL34	SE associated gene	1.34354	-0.540021	303
TPD52L1	SE associated gene	1.34871	-0.538574	304
GAL3ST2	SE associated gene	1.3502	-0.538157	305
CXCL16	SE associated gene	1.35084	-0.537975	306
RMND5B	SE associated gene	1.35692	-0.536268	307
KLHDC7A	SE associated gene	1.35859	-0.535798	308
INHBB	SE associated gene	1.36185	-0.53488	309
PPP1R3D	SE associated gene	1.3836	-0.528709	310
PGAM5	SE associated gene	1.38702	-0.527733	311
PLEKHA7	SE associated gene	1.39261	-0.526135	312
CNNM4	SE associated gene	1.3933	-0.525937	313
SIRT5	SE associated gene	1.39562	-0.525272	314
TMC6	SE associated gene	1.40753	-0.521843	315
VPS37C	SE associated gene	1.41619	-0.519341	316
GABRP	SE associated gene	1.42212	-0.517619	317
FAM217B	SE associated gene	1.4236	-0.517189	318
HRASLS2	SE associated gene	1.46222	-0.505848	319
CHD1	epi genes	1.46474	-0.5051	320
CARKD	SE associated gene	1.46569	-0.504818	321
SMIM3	#N/A	1.47659	-0.501573	322
COL6A3	SE associated gene	1.48006	-0.500537	323
SOX13	SE associated gene	1.49728	-0.495367	324
ARID5B	SE associated gene	1.50067	-0.494345	325
BCOR	SE associated gene	1.5051	-0.493005	326
DTX4	SE associated gene	1.51624	-0.489625	327
COQ9	SE associated gene	1.51668	-0.48949	328
SLC37A1	SE associated gene	1.51943	-0.488653	329
UMODL1	SE associated gene	1.52047	-0.488334	330
LRRC16A	SE associated gene	1.54291	-0.481456	331
FAF1	SE associated gene	1.54605	-0.480486	332
XBP1	SE associated gene	1.55571	-0.477498	333
PSPH	SE associated gene	1.56061	-0.475979	334
SLC25A21	SE associated gene	1.56576	-0.474376	335
EN1	SE associated gene	1.57177	-0.472499	336
CNNM3	SE associated gene	1.57221	-0.472362	337
ALX3	SE associated gene	1.57542	-0.471358	338
RTKN2	SE associated gene	1.57683	-0.470915	339
RSRC1	SE associated gene	1.58939	-0.466972	340
TP53I11	SE associated gene	1.5999	-0.463651	341
EZH2	epi genes	1.60298	-0.462675	342
OCLN	SE associated gene	1.6035	-0.46251	343
MAFB	SE associated gene	1.61189	-0.459842	344
KCNJ18	SE associated gene	1.61499	-0.458854	345
KDM5B	epi genes	1.6187	-0.457671	346
ST14	SE associated gene	1.62413	-0.455931	347
C2CD4C	SE associated gene	1.63668	-0.451899	348
PKIG	SE associated gene	1.64124	-0.450427	349
AKT1	Positive control	1.64252	-0.450015	350
SMAGP	SE associated gene	1.64278	-0.44993	351
GOLGA5	SE associated gene	1.64545	-0.449068	352
SERPINB1	SE associated gene	1.66482	-0.442771	353
SPDEF	SE associated gene	1.66506	-0.442693	354
VIPR1	SE associated gene	1.68042	-0.437661	355
SNAI1	epi genes	1.68133	-0.437361	356
HDAC4	epi genes	1.68733	-0.435384	357
LIMCH1	SE associated gene	1.70019	-0.431129	358
UNC13A	SE associated gene	1.71078	-0.427604	359
KAT2B	epi genes	1.71654	-0.42568	360
UPP1	SE associated gene	1.72419	-0.423118	361
DNMT3L	SE associated gene	1.72438	-0.423052	362
ZIC4	SE associated gene	1.72708	-0.422146	363
CGN	SE associated gene	1.72966	-0.421279	364
ALDH4A1	SE associated gene	1.73282	-0.420214	365
HEG1	SE associated gene	1.73504	-0.419466	366
PXMP2	SE associated gene	1.75429	-0.412945	367
PLEKHF2	SE associated gene	1.75688	-0.412061	368
CALM1	SE associated gene	1.77276	-0.406634	369
TC2N	SE associated gene	1.773	-0.406549	370
APC	Positive control	1.78161	-0.403587	371
ARRB1	SE associated gene	1.78406	-0.402746	372
NFKBIZ	SE associated gene	1.78814	-0.401334	373
GRTP1	SE associated gene	1.7916	-0.40014	374
SYNPO	SE associated gene	1.79301	-0.399651	375
EDIL3	SE associated gene	1.79591	-0.398647	376
AP1B1	SE associated gene	1.79592	-0.398642	377
RNF144A	SE associated gene	1.79976	-0.397309	378
SYCP2	SE associated gene	1.80472	-0.395583	379
USP22	SE associated gene	1.80542	-0.39534	380
FBXO28	SE associated gene	1.82076	-0.38998	381
BMF	SE associated gene	1.82689	-0.387826	382
DUSP15	SE associated gene	1.85126	-0.379208	383
GOLT1A	SE associated gene	1.85465	-0.378004	384
BRD3	epi genes	1.85545	-0.377716	385
CHST12	SE associated gene	1.85821	-0.376733	386
TMC5	SE associated gene	1.87834	-0.369522	387
NECAB3	SE associated gene	1.88601	-0.366757	388
PPM1L	SE associated gene	1.8905	-0.365135	389
ATG101	SE associated gene	1.91522	-0.35614	390
KDM2B	epi genes	1.92041	-0.35424	391
FAM46A	SE associated gene	1.94007	-0.347001	392
MB	SE associated gene	1.94764	-0.344197	393
PPP2R5A	SE associated gene	1.94839	-0.34392	394
CHKA	SE associated gene	1.94851	-0.343877	395
BMP4	SE associated gene	1.95119	-0.342882	396
PRR5	SE associated gene	1.95485	-0.341521	397
TNFAIP2	SE associated gene	1.96154	-0.339025	398
WNT10A	SE associated gene	1.96928	-0.336131	399
FOXJ1	SE associated gene	2.0043	-0.322919	400
SYT17	SE associated gene	2.00822	-0.321426	401
CRISPLD2	SE associated gene	2.01006	-0.320724	402
CREBBP	epi genes	2.01267	-0.319731	403
KDM6A	epi genes	2.02692	-0.314275	404
KIF12	SE associated gene	2.03042	-0.31293	405
FIBCD1	SE associated gene	2.03219	-0.312252	406
CASKIN2	SE associated gene	2.03247	-0.312144	407
TDRKH	SE associated gene	2.03304	-0.311922	408
SERINC3	SE associated gene	2.10099	-0.285389	409
SPTSSB	SE associated gene	2.10415	-0.284136	410
KDM6B	epi genes	2.11423	-0.280127	411
CCDC124	SE associated gene	2.121	-0.277428	412
DUSP8	SE associated gene	2.12707	-0.275001	413
DOPEY2	SE associated gene	2.13738	-0.270863	414
PIM1	SE associated gene	2.13781	-0.270689	415
FOXI1	SE associated gene	2.13959	-0.269974	416
FAS	Positive control	2.14429	-0.268079	417
PLEKHA6	SE associated gene	2.16129	-0.261198	418
HDAC1	epi genes	2.17045	-0.257473	419
SAYSD1	SE associated gene	2.18347	-0.252151	420
CCDC101	SE associated gene	2.19261	-0.248395	421
ZBTB21	SE associated gene	2.19551	-0.247203	422
SULT1A2	SE associated gene	2.21827	-0.237785	423
EZH1	epi genes	2.21958	-0.237238	424
SPICE1	SE associated gene	2.21962	-0.237223	425
SULT1A1	SE associated gene	2.22006	-0.237042	426
KDM3A	epi genes	2.23515	-0.230743	427
MAP3K8	SE associated gene	2.25427	-0.222707	428
GGT1	SE associated gene	2.256	-0.221978	429
PIK3CA	Positive control	2.2651	-0.218131	430
CBR1	SE associated gene	2.27034	-0.215911	431
RAB20	SE associated gene	2.27337	-0.214623	432
MAPKAPK2	SE associated gene	2.28052	-0.211579	433
TMEM116	SE associated gene	2.28876	-0.20806	434
PROC	SE associated gene	2.29287	-0.206301	435
FUT8	SE associated gene	2.30163	-0.202544	436
TMPRSS2	SE associated gene	2.30904	-0.199351	437
AR	epi genes	2.33992	-0.185959	438
EPHB2	SE associated gene	2.33995	-0.185946	439
PRR14L	SE associated gene	2.35588	-0.178975	440
APOBR	SE associated gene	2.3899	-0.163937	441
NUPR1	SE associated gene	2.39828	-0.160204	442
GPRC5C	SE associated gene	2.42712	-0.147262	443
HDAC2	epi genes	2.4334	-0.144423	444
ATP9A	SE associated gene	2.43915	-0.14182	445
KDM4D	epi genes	2.44112	-0.140927	446
MAPKAPK5	SE associated gene	2.44868	-0.137494	447
REPIN1	SE associated gene	2.45021	-0.136798	448
ARHGAP32	SE associated gene	2.45201	-0.135979	449
TTC6	SE associated gene	2.4585	-0.133017	450
IL27	SE associated gene	2.46338	-0.130786	451
TRIM2	SE associated gene	2.47237	-0.126665	452
SLC12A7	SE associated gene	2.47809	-0.124037	453
SNAI2	epi genes	2.50941	-0.109544	454
TATDN1	SE associated gene	2.51313	-0.107813	455
FAM47E	SE associated gene	2.52466	-0.102427	456
ID2	SE associated gene	2.52931	-0.100252	457
ARHGAP31	SE associated gene	2.53314	-0.0984519	458
C2CD4D	SE associated gene	2.5397	-0.095369	459
KRAS	Positive control	2.61842	-0.0577849	460
DEGS1	SE associated gene	2.65185	-0.0414992	461
CLN3	SE associated gene	2.66902	-0.0330622	462
PTPN4	SE associated gene	2.67577	-0.0297296	463
PACSIN1	SE associated gene	2.68913	-0.0231115	464
ZDHHC23	SE associated gene	2.71906	-0.00817471	465
SIDT1	SE associated gene	2.73154	-0.00189944	466
NTC	NA	2.7353	0	467
BRD4	epi genes	2.76555	0.0153361	468
SHROOM3	SE associated gene	2.78138	0.0234296	469
NR4A1	SE associated gene	2.79662	0.0312581	470
PBX1	SE associated gene	2.84169	0.0546533	471
VIM	epi genes	2.84616	0.0569925	472
GOLPH3	SE associated gene	2.91136	0.091503	473
FOXP4	SE associated gene	2.92834	0.100611	474
TBC1D16	SE associated gene	3.14492	0.221131	475
LY6E	SE associated gene	3.21034	0.259102	476
NINJ1	SE associated gene	3.28135	0.301133	477
RPS6KB1	SE associated gene	3.50815	0.440966	478
CBS	SE associated gene	#N/A	#N/A	#N/A
RP11-379F4.4	#N/A	#N/A	#N/A	#N/A
WDR52	SE associated gene	#N/A	#N/A	#N/A

## Sheet: MDAMB468
Gene	Type	MDAMB468 Log fold-change	MDAMB468 LFC rescaled	MDAMB468 drop-out rank
EEFSEC	SE associated gene	-6.57266	-1.06234	1
EEF2	Positive control	-6.4634	-1.06195	2
EIF3A	Positive control	-5.69683	-1.05814	3
NUF2	Positive control	-5.54407	-1.05711	4
MYC	Positive control	-5.25075	-1.0548	5
RPL11	Positive control	-5.22703	-1.05459	6
WDHD1	SE associated gene	-5.1835	-1.0542	7
RPL10A	Positive control	-5.16969	-1.05408	8
CCT7	Positive control	-5.00419	-1.05247	9
CDK1	Positive control	-4.87693	-1.0511	10
CDK9	epi genes	-4.83544	-1.05063	11
WEE1	Positive control	-4.74808	-1.04959	12
RPL23	Positive control	-4.61299	-1.04785	13
COPS8	SE associated gene	-4.57767	-1.04737	14
CCT8	Positive control	-4.38939	-1.0446	15
SEC61G	SE associated gene	-4.20109	-1.04145	16
PSMB2	Positive control	-4.08776	-1.03935	17
VOPP1	SE associated gene	-3.83399	-1.03402	18
EIF3G	Positive control	-3.54299	-1.02667	19
EGFR	SE associated gene	-3.52431	-1.02615	20
USP39	Positive control	-3.49022	-1.02517	21
CLTC	SE associated gene	-3.47719	-1.0248	22
HDAC3	epi genes	-3.40511	-1.02265	23
LANCL2	SE associated gene	-3.26183	-1.01806	24
CTCF	epi genes	-3.22845	-1.01692	25
NDUFB9	SE associated gene	-2.92904	-1.00553	26
CCT3	Positive control	-2.79344	-0.99957	27
BRD2	epi genes	-2.70712	-0.995491	28
RPL36	Positive control	-2.41639	-0.979916	29
MCL1	Positive control	-2.4125	-0.979687	30
MTOR	Positive control	-2.16898	-0.964124	31
PHKG1	SE associated gene	-2.15077	-0.962859	32
NSMCE2	SE associated gene	-2.13137	-0.961495	33
VMP1	SE associated gene	-2.06737	-0.956871	34
RAD51B	SE associated gene	-2.06442	-0.956652	35
CDK7	epi genes	-2.05921	-0.956267	36
ITGB5	SE associated gene	-2.02396	-0.953624	37
PLK1	Positive control	-1.94838	-0.947752	38
EP300	epi genes	-1.82684	-0.937696	39
TUBD1	SE associated gene	-1.80451	-0.935762	40
PSMD1	Positive control	-1.77922	-0.933539	41
SUMF2	SE associated gene	-1.69156	-0.925553	42
KAT5	epi genes	-1.61977	-0.918677	43
SUZ12	epi genes	-1.46876	-0.903168	44
EIF3D	Positive control	-1.46183	-0.902422	45
WWTR1	Positive control	-1.26679	-0.88003	46
ATM	Positive control	-1.25014	-0.877992	47
ZNF713	SE associated gene	-1.24552	-0.877423	48
CHCHD2	SE associated gene	-1.11637	-0.860849	49
DDX3X	SE associated gene	-0.846563	-0.821808	50
AHCYL1	SE associated gene	-0.816712	-0.817095	51
NELFCD	SE associated gene	-0.802263	-0.814784	52
BOC	SE associated gene	-0.791895	-0.813113	53
SIM2	SE associated gene	-0.734234	-0.803638	54
DNMT1	epi genes	-0.731156	-0.803124	55
BRD4	epi genes	-0.640081	-0.787473	56
MED1	epi genes	-0.59063	-0.778628	57
DOT1L	epi genes	-0.576761	-0.776102	58
PGLS	SE associated gene	-0.52979	-0.767399	59
MAD1L1	SE associated gene	-0.412614	-0.744662	60
MARCKSL1	SE associated gene	-0.400883	-0.742303	61
BRCA1	Positive control	-0.391899	-0.740486	62
KDM2A	epi genes	-0.376189	-0.737287	63
ALX3	SE associated gene	-0.336409	-0.729062	64
THEM5	SE associated gene	-0.257649	-0.712238	65
DTX4	SE associated gene	-0.24558	-0.709596	66
HMCES(C3orf37 0.38)	SE associated gene	-0.195289	-0.698399	67
GRTP1	SE associated gene	-0.189158	-0.697013	68
TMEM11	SE associated gene	-0.184655	-0.695992	69
H3F3B	SE associated gene	-0.174788	-0.693746	70
PPIF	SE associated gene	-0.133382	-0.684194	71
KIAA1324	SE associated gene	-0.116794	-0.680307	72
CEBPA	SE associated gene	-0.0777146	-0.671015	73
ABTB2	SE associated gene	-0.069509	-0.66904	74
TNS3	SE associated gene	-0.067986	-0.668672	75
TMC6	SE associated gene	-0.0584544	-0.666365	76
PDS5A	SE associated gene	-0.0439529	-0.662832	77
AKAP10	SE associated gene	-0.0276218	-0.658821	78
SLC12A7	SE associated gene	0.00785726	-0.64999	79
PSPH	SE associated gene	0.0797897	-0.631578	80
EIF3B	Positive control	0.089072	-0.629152	81
HNRNPAB	SE associated gene	0.0923063	-0.628304	82
CTNNB1	Positive control	0.0943942	-0.627756	83
COQ2	SE associated gene	0.106391	-0.624595	84
MRPS17	SE associated gene	0.120062	-0.620969	85
EED	epi genes	0.129902	-0.618344	86
CHKA	SE associated gene	0.134562	-0.617096	87
TWIST2	epi genes	0.139097	-0.615879	88
KDM1A	epi genes	0.147607	-0.613587	89
COQ9	SE associated gene	0.150023	-0.612935	90
LLGL2	SE associated gene	0.153951	-0.611872	91
APC	Positive control	0.169731	-0.607583	92
COL6A2	SE associated gene	0.175292	-0.606063	93
PBX1	SE associated gene	0.208545	-0.596885	94
ASS1	SE associated gene	0.209153	-0.596716	95
CYR61	SE associated gene	0.209898	-0.596509	96
TP53	Positive control	0.220602	-0.59352	97
TWIST1	epi genes	0.248654	-0.585611	98
KCNJ12	SE associated gene	0.249167	-0.585466	99
RASSF5	SE associated gene	0.263722	-0.581317	100
ATF3	SE associated gene	0.267137	-0.58034	101
MIF4GD	SE associated gene	0.272866	-0.578696	102
TTC39A	SE associated gene	0.282418	-0.575945	103
PLXND1	SE associated gene	0.282756	-0.575847	104
CLPTM1L	SE associated gene	0.289685	-0.573843	105
GDPD5	SE associated gene	0.296379	-0.571901	106
KMT2A	epi genes	0.307334	-0.568708	107
IGFBP5	SE associated gene	0.331043	-0.561738	108
CBX2	SE associated gene	0.337191	-0.559918	109
CCDC101	SE associated gene	0.35804	-0.553704	110
AP1B1	SE associated gene	0.376503	-0.548148	111
SYK	SE associated gene	0.377347	-0.547892	112
HEATR6	SE associated gene	0.387003	-0.544966	113
BAMBI	SE associated gene	0.389263	-0.544279	114
SERPINB1	SE associated gene	0.392818	-0.543197	115
RSPH1	SE associated gene	0.395873	-0.542265	116
ADAMTS2	SE associated gene	0.403922	-0.539805	117
GATA2	SE associated gene	0.405349	-0.539368	118
IQCC	SE associated gene	0.42877	-0.532149	119
KDM4A	epi genes	0.438138	-0.529239	120
FBXO28	SE associated gene	0.441121	-0.528309	121
ATG101	SE associated gene	0.448719	-0.525936	122
CCDC124	SE associated gene	0.450282	-0.525447	123
E2F1	SE associated gene	0.465329	-0.520718	124
CARKD	SE associated gene	0.471109	-0.518892	125
BACE2	SE associated gene	0.476894	-0.51706	126
SMEK1	SE associated gene	0.477826	-0.516764	127
SOX11	SE associated gene	0.482236	-0.515364	128
HOXD11	SE associated gene	0.484254	-0.514722	129
PLAC8	SE associated gene	0.491425	-0.512436	130
KDM3B	epi genes	0.491801	-0.512316	131
SQLE	SE associated gene	0.495654	-0.511084	132
PDE9A	SE associated gene	0.499694	-0.50979	133
USP32	SE associated gene	0.504856	-0.508133	134
PPFIBP2	SE associated gene	0.505629	-0.507885	135
AKT1	Positive control	0.516279	-0.504453	136
KAT2B	epi genes	0.517517	-0.504053	137
HOXD3	SE associated gene	0.519989	-0.503253	138
TP53I11	SE associated gene	0.525904	-0.501336	139
CAPN9	SE associated gene	0.529731	-0.500093	140
KARS	Positive control	0.530551	-0.499826	141
KDM4C	epi genes	0.53573	-0.49814	142
SERPINB9	SE associated gene	0.540883	-0.496458	143
MPV17L2	SE associated gene	0.56018	-0.490123	144
N4BP3	SE associated gene	0.563871	-0.488904	145
CCDC40	SE associated gene	0.576999	-0.484555	146
ADPRH	SE associated gene	0.580147	-0.483507	147
TC2N	SE associated gene	0.587181	-0.481163	148
SYT15	SE associated gene	0.593226	-0.479141	149
SLC9A3R1	SE associated gene	0.593604	-0.479015	150
GFOD1	SE associated gene	0.595222	-0.478473	151
GPRIN2	SE associated gene	0.596071	-0.478188	152
SIX1	SE associated gene	0.606578	-0.474657	153
VTN	SE associated gene	0.61193	-0.472851	154
MAST3	SE associated gene	0.612212	-0.472756	155
CBX8	SE associated gene	0.613999	-0.472152	156
TMEM65	SE associated gene	0.615371	-0.471688	157
CA4	SE associated gene	0.619698	-0.470223	158
KDM4B	epi genes	0.623148	-0.469053	159
LDHD	SE associated gene	0.630286	-0.466625	160
PEX13	SE associated gene	0.634539	-0.465175	161
LY6E	SE associated gene	0.644226	-0.461862	162
KCNC4	SE associated gene	0.648289	-0.460469	163
CCND1	SE associated gene	0.649235	-0.460143	164
GPR124	SE associated gene	0.659455	-0.456624	165
OCLN	SE associated gene	0.659812	-0.456501	166
TBC1D16	SE associated gene	0.667003	-0.454014	167
WWC1	SE associated gene	0.668443	-0.453516	168
NINJ1	SE associated gene	0.674508	-0.451411	169
PPM1L	SE associated gene	0.675835	-0.45095	170
GALNT12	SE associated gene	0.683835	-0.448163	171
COL6A1	SE associated gene	0.686081	-0.447378	172
GPR19	SE associated gene	0.687736	-0.4468	173
RARRES1	SE associated gene	0.690234	-0.445926	174
RDH13	SE associated gene	0.694462	-0.444445	175
MAPK1	Positive control	0.707693	-0.439792	176
GADD45G	SE associated gene	0.713063	-0.437895	177
FAM132B	SE associated gene	0.713623	-0.437697	178
MAPKAPK5	SE associated gene	0.71376	-0.437649	179
PATZ1	SE associated gene	0.718241	-0.436062	180
FAM46A	SE associated gene	0.718424	-0.435997	181
ATOH8	SE associated gene	0.721654	-0.434852	182
KIAA0513	SE associated gene	0.721936	-0.434752	183
PIK3C2B	SE associated gene	0.725433	-0.433509	184
FAM117A	SE associated gene	0.727392	-0.432812	185
ZNRF1	SE associated gene	0.736752	-0.429475	186
C2CD4D	SE associated gene	0.741928	-0.427623	187
SLC2A10	SE associated gene	0.751279	-0.424266	188
SMARCD2	SE associated gene	0.753347	-0.423522	189
SOX13	SE associated gene	0.758151	-0.421791	190
EPS8L1	SE associated gene	0.763921	-0.419706	191
HDAC11	SE associated gene	0.769329	-0.417748	192
CASKIN2	SE associated gene	0.77998	-0.413877	193
ADORA2A	SE associated gene	0.784597	-0.412194	194
ADAM12	SE associated gene	0.786334	-0.411559	195
PIM1	SE associated gene	0.792997	-0.409122	196
QRFP	SE associated gene	0.79671	-0.407761	197
CLIC4	SE associated gene	0.799693	-0.406665	198
KDM5B	epi genes	0.802399	-0.40567	199
BRCA2	Positive control	0.806006	-0.404342	200
TPPP	SE associated gene	0.806418	-0.404191	201
DHRS3	SE associated gene	0.812899	-0.401799	202
LOH12CR1	SE associated gene	0.816359	-0.400519	203
CYB561	SE associated gene	0.816696	-0.400394	204
HOXD1	SE associated gene	0.820515	-0.398979	205
INPP5J	SE associated gene	0.82113	-0.398751	206
SYNGR2	SE associated gene	0.824374	-0.397547	207
TGFB2	SE associated gene	0.830365	-0.395319	208
KDM5A	epi genes	0.832052	-0.394691	209
ZHX2	SE associated gene	0.833155	-0.39428	210
KDM3A	epi genes	0.834196	-0.393891	211
ITGA11	SE associated gene	0.834951	-0.39361	212
LPCAT1	SE associated gene	0.83614	-0.393166	213
CALD1	SE associated gene	0.843395	-0.390453	214
MAPKAPK2	SE associated gene	0.843739	-0.390324	215
CRISPLD2	SE associated gene	0.845795	-0.389554	216
GGT1	SE associated gene	0.85464	-0.386232	217
SERINC3	SE associated gene	0.855409	-0.385942	218
JAK3	SE associated gene	0.856503	-0.38553	219
SNAI1	epi genes	0.856596	-0.385495	220
EN1	SE associated gene	0.85966	-0.38434	221
ASCL2	SE associated gene	0.860818	-0.383903	222
SMAD6	SE associated gene	0.862213	-0.383377	223
FAM174B	SE associated gene	0.862718	-0.383186	224
MAP3K1	SE associated gene	0.863806	-0.382775	225
MAP3K1	SE associated gene	0.863806	-0.382775	225
COL6A3	SE associated gene	0.865435	-0.382159	227
BCDIN3D	SE associated gene	0.868385	-0.381044	228
CNNM3	SE associated gene	0.870284	-0.380324	229
BCL2	Positive control	0.87185	-0.379731	230
SBK1	SE associated gene	0.872379	-0.37953	231
RASD2	SE associated gene	0.874441	-0.378748	232
CBR1	SE associated gene	0.876941	-0.377798	233
KDM6A	epi genes	0.877224	-0.377691	234
LCTL	SE associated gene	0.886215	-0.374267	235
BATF	SE associated gene	0.888232	-0.373498	236
SALL4	SE associated gene	0.895433	-0.370744	237
FOXJ1	SE associated gene	0.895676	-0.370651	238
TDRKH	SE associated gene	0.904341	-0.367326	239
CRYBA2	SE associated gene	0.907298	-0.366188	240
ZDHHC23	SE associated gene	0.909073	-0.365505	241
GALNT6	SE associated gene	0.912645	-0.364127	242
MCF2L	SE associated gene	0.918964	-0.361686	243
PLEKHA7	SE associated gene	0.920437	-0.361116	244
GAL3ST2	SE associated gene	0.923594	-0.359893	245
MSX2	SE associated gene	0.925685	-0.359082	246
ZCCHC24	SE associated gene	0.932433	-0.356461	247
SMIM3	#N/A	0.935866	-0.355124	248
EPCAM	SE associated gene	0.936646	-0.35482	249
TTC3	SE associated gene	0.940349	-0.353376	250
RAP1GAP	SE associated gene	0.941436	-0.352951	251
XBP1	SE associated gene	0.941493	-0.352929	252
MAP3K8	SE associated gene	0.948122	-0.350336	253
AIF1L	SE associated gene	0.950025	-0.349591	254
RUNX3	SE associated gene	0.952362	-0.348674	255
RSRC1	SE associated gene	0.952884	-0.348469	256
FUT8	SE associated gene	0.954251	-0.347932	257
SULT1A2	SE associated gene	0.95473	-0.347744	258
UPP1	SE associated gene	0.954788	-0.347722	259
ALDH3B2	SE associated gene	0.95556	-0.347418	260
EPHB2	SE associated gene	0.957429	-0.346684	261
NR4A1	SE associated gene	0.958766	-0.346158	262
FAIM2	SE associated gene	0.960584	-0.345442	263
RNF144A	SE associated gene	0.961519	-0.345074	264
PPP1R3D	SE associated gene	0.964654	-0.343839	265
SRC	Positive control	0.96503	-0.34369	266
FOXA1	SE associated gene	0.965399	-0.343545	267
TRPS1	SE associated gene	0.96593	-0.343335	268
PGAM5	SE associated gene	0.969925	-0.341757	269
UNK	SE associated gene	0.971592	-0.341098	270
ZNF148	SE associated gene	0.973633	-0.340291	271
CHD1	epi genes	0.974636	-0.339894	272
PDCD4	SE associated gene	0.97965	-0.337906	273
JDP2	SE associated gene	0.982815	-0.336649	274
ZBTB8A	SE associated gene	0.985338	-0.335646	275
ESRP1	SE associated gene	0.985385	-0.335627	276
INSL3	SE associated gene	0.990752	-0.333489	277
SIRT5	SE associated gene	0.992734	-0.332699	278
KCNJ18	SE associated gene	0.995959	-0.331411	279
SPDEF	SE associated gene	0.998889	-0.330239	280
NRAS	Positive control	0.999886	-0.32984	281
FAM198A	SE associated gene	1.00218	-0.328923	282
KRAS	Positive control	1.00305	-0.328574	283
CHST8	SE associated gene	1.00347	-0.328403	284
CLN3	SE associated gene	1.00507	-0.327765	285
PDGFRB	SE associated gene	1.00983	-0.325851	286
SYNPO	SE associated gene	1.00984	-0.325848	287
SULT1A1	SE associated gene	1.01051	-0.325578	288
APOBR	SE associated gene	1.01051	-0.325578	289
ABL1	Positive control	1.02112	-0.321304	290
IL34	SE associated gene	1.02286	-0.320602	291
FIBCD1	SE associated gene	1.02317	-0.320475	292
RABEP1	SE associated gene	1.02572	-0.319443	293
BMF	SE associated gene	1.02795	-0.318543	294
CAMSAP3	SE associated gene	1.03442	-0.315917	295
BID	SE associated gene	1.03812	-0.314414	296
FAM47E	SE associated gene	1.0436	-0.312185	297
ZIC1	SE associated gene	1.04516	-0.311548	298
EZH2	epi genes	1.04961	-0.309731	299
PTPRJ	SE associated gene	1.05046	-0.309385	300
CABLES1	SE associated gene	1.05066	-0.309305	301
INHBB	SE associated gene	1.05105	-0.309144	302
MTCL1	SE associated gene	1.05359	-0.308104	303
FAM217B	SE associated gene	1.05683	-0.306777	304
UMODL1	SE associated gene	1.05685	-0.306771	305
AZGP1	SE associated gene	1.05716	-0.306644	306
TRIB1	SE associated gene	1.05784	-0.306364	307
ERMP1	SE associated gene	1.06255	-0.304434	308
KSR1	SE associated gene	1.06262	-0.304405	309
CELSR2	SE associated gene	1.06277	-0.304343	310
COL15A1	SE associated gene	1.06505	-0.303403	311
ARID5B	SE associated gene	1.06518	-0.303352	312
ATP9A	SE associated gene	1.06749	-0.3024	313
PODXL	SE associated gene	1.0696	-0.301531	314
WNT10A	SE associated gene	1.07463	-0.29946	315
TRMT12	SE associated gene	1.0764	-0.298729	316
FOXS1	SE associated gene	1.08636	-0.294604	317
DUSP15	SE associated gene	1.08743	-0.294163	318
PLEKHH1	SE associated gene	1.08927	-0.293399	319
FOXP4	SE associated gene	1.0898	-0.293179	320
GLYATL1	SE associated gene	1.09432	-0.291297	321
RHPN2	SE associated gene	1.09652	-0.290381	322
TPRG1	SE associated gene	1.10289	-0.287726	323
HOXD4	SE associated gene	1.11108	-0.284301	324
TOX2	SE associated gene	1.11302	-0.28349	325
BPGM	SE associated gene	1.11454	-0.282852	326
LIMCH1	SE associated gene	1.11573	-0.282354	327
TNFAIP2	SE associated gene	1.11582	-0.282315	328
PXMP2	SE associated gene	1.11595	-0.282261	329
IL27	SE associated gene	1.11603	-0.282228	330
GOLPH3	SE associated gene	1.11614	-0.282179	331
SLC12A8	SE associated gene	1.11615	-0.282175	332
NFKBIZ	SE associated gene	1.12001	-0.280557	333
ARRB1	SE associated gene	1.12351	-0.279083	334
ARHGAP8	SE associated gene	1.12508	-0.278419	335
RB1	Positive control	1.12785	-0.277254	336
PKIG	SE associated gene	1.1291	-0.276728	337
TEX36	SE associated gene	1.13508	-0.274199	338
FBLN2	SE associated gene	1.13536	-0.274082	339
DEGS1	SE associated gene	1.13591	-0.273851	340
GPRC5C	SE associated gene	1.13726	-0.273276	341
DNMT3L	SE associated gene	1.13782	-0.27304	342
STRA6	SE associated gene	1.14348	-0.270641	343
NATD1	SE associated gene	1.14634	-0.269429	344
EFHD1	SE associated gene	1.14654	-0.269343	345
HEG1	SE associated gene	1.14796	-0.26874	346
RAB11FIP1	SE associated gene	1.15232	-0.266882	347
SPICE1	SE associated gene	1.1544	-0.265999	348
CX3CL1	SE associated gene	1.15732	-0.264751	349
SNAI2	epi genes	1.15807	-0.264432	350
BCL2L13	SE associated gene	1.15842	-0.264284	351
PACSIN1	SE associated gene	1.15938	-0.263872	352
BTG2	SE associated gene	1.16071	-0.263307	353
TMPRSS2	SE associated gene	1.16394	-0.261926	354
KAT2A	epi genes	1.16397	-0.261912	355
CGN	SE associated gene	1.16428	-0.261779	356
RBM38	SE associated gene	1.16535	-0.261322	357
BRD3	epi genes	1.16964	-0.259481	358
RNF139	SE associated gene	1.17201	-0.258466	359
PRODH	SE associated gene	1.17417	-0.257538	360
DOPEY2	SE associated gene	1.17591	-0.256789	361
DUSP8	SE associated gene	1.17613	-0.256695	362
GUCD1 (C22orf13)	SE associated gene	1.18482	-0.252953	363
RARRES3	SE associated gene	1.18507	-0.252844	364
CXCL16	SE associated gene	1.18806	-0.251554	365
LRRC75B	SE associated gene	1.18855	-0.251345	366
HDAC4	epi genes	1.18918	-0.25107	367
BAHD1	SE associated gene	1.19097	-0.250297	368
ZMYND15	SE associated gene	1.19744	-0.247498	369
KDM1B	epi genes	1.19771	-0.24738	370
CHST12	SE associated gene	1.2004	-0.246214	371
KCNQ1	SE associated gene	1.20244	-0.245327	372
BMP4	SE associated gene	1.20543	-0.244025	373
UNC13A	SE associated gene	1.20568	-0.24392	374
CCDC125	SE associated gene	1.20782	-0.242986	375
ARHGAP32	SE associated gene	1.2107	-0.241732	376
NBPF3	SE associated gene	1.21693	-0.239016	377
FAS	Positive control	1.22154	-0.237001	378
TPM1	SE associated gene	1.22154	-0.236998	379
SLC37A1	SE associated gene	1.22254	-0.236562	380
GSTM4	SE associated gene	1.22952	-0.233502	381
PPP2R5A	SE associated gene	1.23057	-0.23304	382
GGT6	SE associated gene	1.23074	-0.232965	383
HDAC1	epi genes	1.23384	-0.231602	384
BCOR	SE associated gene	1.23429	-0.231406	385
ST14	SE associated gene	1.23509	-0.231052	386
PAX9	SE associated gene	1.24029	-0.228762	387
EPHB3	SE associated gene	1.24104	-0.228431	388
TPD52L1	SE associated gene	1.24234	-0.227862	389
USP22	SE associated gene	1.24621	-0.22615	390
NECAB3	SE associated gene	1.25056	-0.224227	391
MTSS1L	SE associated gene	1.26301	-0.218704	392
VPS37C	SE associated gene	1.2677	-0.216617	393
PRR14L	SE associated gene	1.27038	-0.215422	394
NUAK1	SE associated gene	1.27134	-0.214995	395
SRCIN1	SE associated gene	1.27464	-0.213522	396
LINGO1	SE associated gene	1.27632	-0.212769	397
GABRP	SE associated gene	1.2795	-0.211347	398
MB	SE associated gene	1.28083	-0.210753	399
C2CD4C	SE associated gene	1.28267	-0.209927	400
SIDT1	SE associated gene	1.28491	-0.208926	401
SYCP2	SE associated gene	1.28723	-0.207884	402
PRSS35	SE associated gene	1.29744	-0.203292	403
RAB20	SE associated gene	1.30267	-0.200932	404
KLHDC7A	SE associated gene	1.30512	-0.199825	405
REPIN1	SE associated gene	1.3054	-0.1997	406
KIF12	SE associated gene	1.31189	-0.196762	407
MAFB	SE associated gene	1.31395	-0.195826	408
TTC6	SE associated gene	1.31801	-0.193987	409
HRASLS2	SE associated gene	1.31933	-0.193387	410
CNNM4	SE associated gene	1.32925	-0.18887	411
SYT17	SE associated gene	1.33267	-0.187309	412
KCNK5	SE associated gene	1.33523	-0.186141	413
ANXA11	SE associated gene	1.34832	-0.18014	414
HS6ST1	SE associated gene	1.35632	-0.176461	415
KIAA0196	SE associated gene	1.35827	-0.175564	416
PPAP2C	SE associated gene	1.36609	-0.171952	417
ZEB1	epi genes	1.39117	-0.160302	418
PTPN4	SE associated gene	1.39389	-0.159028	419
WHSC1	epi genes	1.40254	-0.154984	420
UBL7	SE associated gene	1.40916	-0.151878	421
FOXI1	SE associated gene	1.4129	-0.150118	422
NUPR1	SE associated gene	1.41514	-0.149065	423
PLEKHA6	SE associated gene	1.41895	-0.147267	424
GRHL1	SE associated gene	1.42014	-0.146706	425
RPS6KA5	SE associated gene	1.43527	-0.139551	426
KDM6B	epi genes	1.43536	-0.139506	427
SLC25A21	SE associated gene	1.4402	-0.13721	428
FAF1	SE associated gene	1.44707	-0.133939	429
SHROOM3	SE associated gene	1.44731	-0.133825	430
TMEM241	SE associated gene	1.44737	-0.133796	431
DDAH1	SE associated gene	1.44907	-0.132987	432
RTKN2	SE associated gene	1.45906	-0.128217	433
MTMR12	SE associated gene	1.46372	-0.125983	434
ALDH4A1	SE associated gene	1.47348	-0.121298	435
SPTSSB	SE associated gene	1.47529	-0.120426	436
RMND5B	SE associated gene	1.47671	-0.119742	437
GOLT1A	SE associated gene	1.4816	-0.117388	438
ELF3	SE associated gene	1.49233	-0.112202	439
DCAF5	SE associated gene	1.50373	-0.106671	440
ARHGAP31	SE associated gene	1.50965	-0.103786	441
GOLGA5	SE associated gene	1.51522	-0.101073	442
PROC	SE associated gene	1.53355	-0.0920961	443
SAYSD1	SE associated gene	1.53386	-0.0919429	444
ZIC4	SE associated gene	1.54669	-0.0856203	445
DLX3	SE associated gene	1.54696	-0.0854905	446
TRAFD1	SE associated gene	1.55276	-0.0826213	447
EDIL3	SE associated gene	1.55648	-0.0807806	448
MAP2K3	SE associated gene	1.55942	-0.0793232	449
USP34	SE associated gene	1.56017	-0.0789542	450
KAT6A	epi genes	1.57312	-0.0725125	451
KDM4D	epi genes	1.57401	-0.0720737	452
TRIM2	SE associated gene	1.60018	-0.0589686	453
LRRC16A	SE associated gene	1.60612	-0.0559783	454
VIM	epi genes	1.60865	-0.0547034	455
CALM1	SE associated gene	1.6115	-0.0532641	456
TMC5	SE associated gene	1.6214	-0.0482598	457
ZBTB21	SE associated gene	1.62153	-0.0481917	458
KDM2B	epi genes	1.63115	-0.0433098	459
GJC3	SE associated gene	1.63574	-0.0409769	460
TMEM116	SE associated gene	1.65039	-0.033502	461
ID2	SE associated gene	1.6521	-0.032625	462
RPS6KB1	SE associated gene	1.6697	-0.0235868	463
EZH1	epi genes	1.70425	-0.00569485	464
PPIL1	SE associated gene	1.70688	-0.00432556	465
NTC	NA	1.71516	0	466
CREBBP	epi genes	1.71567	0.000268078	467
PIK3CA	Positive control	1.72187	0.00351456	468
EFCAB11	SE associated gene	1.73813	0.0120564	469
AR	epi genes	1.77081	0.0293632	470
PRR5	SE associated gene	1.79601	0.0428361	471
STXBP2	SE associated gene	1.80072	0.0453633	472
SMAGP	SE associated gene	1.80681	0.0486411	473
VIPR1	SE associated gene	1.84886	0.0714436	474
TATDN1	SE associated gene	1.95439	0.130003	475
PLEKHF2	SE associated gene	1.96486	0.135919	476
CP	SE associated gene	2.03341	0.1751	477
HDAC2	epi genes	2.08587	0.205618	478
CBS	SE associated gene	#N/A	#N/A	#N/A
RP11-379F4.4	#N/A	#N/A	#N/A	#N/A
WDR52	SE associated gene	#N/A	#N/A	#N/A

## Sheet: MFM223
Gene	Type	MFM223 lfc	MFM223 LFC rescaled	MFM223 drop-out rank
RPL11	Positive control	-6.68342	-1.11826	1
EEF2	Positive control	-5.96422	-1.11185	2
PSMB2	Positive control	-5.68658	-1.1084	3
MYC	Positive control	-5.5827	-1.10692	4
CCT7	Positive control	-5.51399	-1.10589	5
NSMCE2	SE associated gene	-5.48687	-1.10547	6
TRMT12	SE associated gene	-5.45351	-1.10494	7
MCL1	Positive control	-5.22269	-1.10094	8
SQLE	SE associated gene	-4.90902	-1.09439	9
RPL23	Positive control	-4.82923	-1.09249	10
CDK9	epi genes	-4.53799	-1.08461	11
NDUFB9	SE associated gene	-4.46294	-1.08232	12
WEE1	Positive control	-4.46287	-1.08232	13
NATD1	SE associated gene	-4.36772	-1.07924	14
CCND1	SE associated gene	-4.23651	-1.07466	15
EIF3A	Positive control	-4.02697	-1.06646	16
PPIF	SE associated gene	-3.89167	-1.06053	17
CDK1	Positive control	-3.82429	-1.05737	18
HDAC3	epi genes	-3.65664	-1.04887	19
CCT8	Positive control	-3.6002	-1.0458	20
USP39	Positive control	-3.37195	-1.03213	21
RPL36	Positive control	-3.35584	-1.03108	22
MAD1L1	SE associated gene	-3.29428	-1.02699	23
RPL10A	Positive control	-3.22458	-1.02216	24
AKAP10	SE associated gene	-3.15435	-1.01707	25
COPS8	SE associated gene	-3.08157	-1.01154	26
PIK3CA	Positive control	-3.06246	-1.01005	27
CCDC124	SE associated gene	-3.04159	-1.0084	28
KCNJ12	SE associated gene	-3.02942	-1.00742	29
NUF2	Positive control	-3.02937	-1.00742	30
MAP2K3	SE associated gene	-3.00262	-1.00525	31
RNF139	SE associated gene	-2.98767	-1.00402	32
PGLS	SE associated gene	-2.88202	-0.99501	33
PLK1	Positive control	-2.77216	-0.984975	34
TMEM65	SE associated gene	-2.65798	-0.973787	35
WDHD1	SE associated gene	-2.62356	-0.970255	36
KAT5	epi genes	-2.48385	-0.955119	37
KCNJ18	SE associated gene	-2.48226	-0.954939	38
CLTC	SE associated gene	-2.43879	-0.949952	39
TATDN1	SE associated gene	-2.41282	-0.94691	40
MTOR	Positive control	-2.37056	-0.941853	41
TRIB1	SE associated gene	-2.35412	-0.939851	42
CDK7	epi genes	-2.3402	-0.938139	43
EIF3D	Positive control	-2.16484	-0.915302	44
TMEM11	SE associated gene	-2.16373	-0.91515	45
CCT3	Positive control	-2.11737	-0.908695	46
KIAA0196	SE associated gene	-2.04831	-0.898745	47
CTCF	epi genes	-2.00282	-0.891964	48
FOXA1	SE associated gene	-1.95368	-0.884433	49
PAX9	SE associated gene	-1.93832	-0.882033	50
EIF3G	Positive control	-1.7574	-0.852105	51
PSMD1	Positive control	-1.63992	-0.830939	52
EEFSEC	SE associated gene	-1.61079	-0.82547	53
ZCCHC24	SE associated gene	-1.48569	-0.800942	54
JAK3	SE associated gene	-1.39207	-0.781441	55
VMP1	SE associated gene	-1.35562	-0.773577	56
MAST3	SE associated gene	-1.32907	-0.767747	57
ATG101	SE associated gene	-1.32717	-0.767327	58
HEATR6	SE associated gene	-1.30295	-0.761932	59
WWTR1	Positive control	-1.28824	-0.75862	60
ALDH3B2	SE associated gene	-1.25253	-0.750472	61
NELFCD	SE associated gene	-1.22837	-0.744869	62
HNRNPAB	SE associated gene	-1.18514	-0.734666	63
BRCA1	Positive control	-1.14982	-0.726155	64
LANCL2	SE associated gene	-1.14093	-0.723985	65
UNC13A	SE associated gene	-1.13037	-0.721398	66
SPDEF	SE associated gene	-1.09658	-0.713021	67
MPV17L2	SE associated gene	-1.08871	-0.711049	68
GPR124	SE associated gene	-1.08317	-0.709655	69
SMEK1	SE associated gene	-1.05212	-0.701774	70
KDM2A	epi genes	-1.0486	-0.700872	71
SEC61G	SE associated gene	-1.04519	-0.699997	72
RAB11FIP1	SE associated gene	-1.02259	-0.694158	73
EPCAM	SE associated gene	-1.02226	-0.694074	74
MRPS17	SE associated gene	-0.985084	-0.684319	75
KDM5A	epi genes	-0.979603	-0.682865	76
RAD51B	SE associated gene	-0.93882	-0.67192	77
BRD2	epi genes	-0.932367	-0.670168	78
SUZ12	epi genes	-0.916603	-0.665862	79
ANXA11	SE associated gene	-0.885359	-0.657227	80
DOT1L	epi genes	-0.863275	-0.651042	81
TRPS1	SE associated gene	-0.846981	-0.646435	82
KARS	Positive control	-0.845625	-0.646049	83
BRCA2	Positive control	-0.829291	-0.64139	84
ELF3	SE associated gene	-0.803631	-0.633994	85
KRAS	Positive control	-0.798888	-0.632616	86
CHKA	SE associated gene	-0.78709	-0.629176	87
EIF3B	Positive control	-0.77656	-0.626089	88
USP32	SE associated gene	-0.695817	-0.601882	89
THEM5	SE associated gene	-0.691279	-0.600494	90
TUBD1	SE associated gene	-0.658161	-0.590267	91
BCDIN3D	SE associated gene	-0.657065	-0.589925	92
RSRC1	SE associated gene	-0.646173	-0.586525	93
SLC12A7	SE associated gene	-0.646052	-0.586487	94
MED1	epi genes	-0.643748	-0.585765	95
MARCKSL1	SE associated gene	-0.636751	-0.583568	96
HMCES(C3orf37 0.38)	SE associated gene	-0.588641	-0.568267	97
AKT1	Positive control	-0.54985	-0.555674	98
KDM6A	epi genes	-0.549599	-0.555592	99
KDM1A	epi genes	-0.545145	-0.554131	100
BOC	SE associated gene	-0.506189	-0.541226	101
BTG2	SE associated gene	-0.482065	-0.533116	102
HDAC11	SE associated gene	-0.481976	-0.533087	103
SMAD6	SE associated gene	-0.481295	-0.532856	104
GGT6	SE associated gene	-0.480733	-0.532666	105
PATZ1	SE associated gene	-0.462428	-0.526449	106
CHCHD2	SE associated gene	-0.460346	-0.525739	107
LLGL2	SE associated gene	-0.456634	-0.52447	108
ITGA11	SE associated gene	-0.440403	-0.518899	109
PEX13	SE associated gene	-0.435907	-0.517349	110
CCDC40	SE associated gene	-0.426037	-0.513934	111
KAT6A	epi genes	-0.420985	-0.51218	112
FAM117A	SE associated gene	-0.417131	-0.51084	113
USP34	SE associated gene	-0.373847	-0.495622	114
GALNT6	SE associated gene	-0.353028	-0.488197	115
CREBBP	epi genes	-0.343609	-0.484815	116
GJC3	SE associated gene	-0.33182	-0.480562	117
DNMT1	epi genes	-0.322032	-0.477015	118
SALL4	SE associated gene	-0.318361	-0.47568	119
INSL3	SE associated gene	-0.295345	-0.467263	120
MIF4GD	SE associated gene	-0.295312	-0.467251	121
HS6ST1	SE associated gene	-0.294736	-0.467039	122
TTC39A	SE associated gene	-0.287609	-0.464415	123
PSPH	SE associated gene	-0.284135	-0.463133	124
CYR61	SE associated gene	-0.267653	-0.457023	125
EPHB3	SE associated gene	-0.25813	-0.453473	126
ATM	Positive control	-0.251914	-0.451148	127
KDM5B	epi genes	-0.247806	-0.449608	128
GPR19	SE associated gene	-0.243949	-0.448159	129
KDM4A	epi genes	-0.238808	-0.446225	130
TMEM241	SE associated gene	-0.227416	-0.441923	131
TRAFD1	SE associated gene	-0.222244	-0.439963	132
PDE9A	SE associated gene	-0.221174	-0.439557	133
C2CD4C	SE associated gene	-0.213805	-0.436755	134
CEBPA	SE associated gene	-0.208989	-0.434919	135
EGFR	SE associated gene	-0.201431	-0.432031	136
SIM2	SE associated gene	-0.196797	-0.430255	137
ATF3	SE associated gene	-0.187755	-0.42678	138
BID	SE associated gene	-0.185411	-0.425877	139
KAT2B	epi genes	-0.179282	-0.423512	140
ALDH4A1	SE associated gene	-0.172069	-0.42072	141
TPRG1	SE associated gene	-0.165873	-0.418315	142
MAPK1	Positive control	-0.164109	-0.417629	143
PLXND1	SE associated gene	-0.159523	-0.415844	144
KDM3B	epi genes	-0.156278	-0.414579	145
VOPP1	SE associated gene	-0.153152	-0.413358	146
E2F1	SE associated gene	-0.152289	-0.413021	147
NBPF3	SE associated gene	-0.148914	-0.411701	148
BMF	SE associated gene	-0.145868	-0.410507	149
ERMP1	SE associated gene	-0.144376	-0.409922	150
TPPP	SE associated gene	-0.14225	-0.409088	151
BMP4	SE associated gene	-0.140609	-0.408444	152
COL15A1	SE associated gene	-0.137895	-0.407377	153
PHKG1	SE associated gene	-0.130191	-0.404342	154
ZDHHC23	SE associated gene	-0.121111	-0.400753	155
ID2	SE associated gene	-0.120215	-0.400398	156
CALD1	SE associated gene	-0.119729	-0.400206	157
SYNGR2	SE associated gene	-0.117703	-0.399403	158
GPRIN2	SE associated gene	-0.11448	-0.398123	159
ABTB2	SE associated gene	-0.114306	-0.398054	160
EN1	SE associated gene	-0.114018	-0.39794	161
WNT10A	SE associated gene	-0.111892	-0.397095	162
CBX8	SE associated gene	-0.110299	-0.396461	163
RASD2	SE associated gene	-0.108427	-0.395717	164
GADD45G	SE associated gene	-0.108175	-0.395616	165
MTMR12	SE associated gene	-0.106636	-0.395003	166
FUT8	SE associated gene	-0.103984	-0.393946	167
FOXS1	SE associated gene	-0.103822	-0.393881	168
ITGB5	SE associated gene	-0.102838	-0.393489	169
TDRKH	SE associated gene	-0.102465	-0.39334	170
KCNC4	SE associated gene	-0.102012	-0.393159	171
CARKD	SE associated gene	-0.100926	-0.392725	172
ARID5B	SE associated gene	-0.0954863	-0.39055	173
AHCYL1	SE associated gene	-0.0881015	-0.38759	174
ZNRF1	SE associated gene	-0.087932	-0.387522	175
H3F3B	SE associated gene	-0.0712383	-0.380795	176
RPS6KA5	SE associated gene	-0.0699497	-0.380274	177
KIAA1324	SE associated gene	-0.0695873	-0.380127	178
DLX3	SE associated gene	-0.0683925	-0.379643	179
REPIN1	SE associated gene	-0.0663818	-0.378829	180
SLC2A10	SE associated gene	-0.0651657	-0.378336	181
ADAMTS2	SE associated gene	-0.0598891	-0.376195	182
USP22	SE associated gene	-0.046997	-0.370944	183
TPM1	SE associated gene	-0.0461626	-0.370603	184
HOXD3	SE associated gene	-0.0451292	-0.370181	185
CCDC101	SE associated gene	-0.0416812	-0.368771	186
AP1B1	SE associated gene	-0.0412101	-0.368578	187
GRHL1	SE associated gene	-0.0411993	-0.368573	188
BACE2	SE associated gene	-0.0373464	-0.366995	189
HDAC1	epi genes	-0.0280723	-0.363185	190
SUMF2	SE associated gene	-0.0235355	-0.361316	191
RABEP1	SE associated gene	-0.0146839	-0.35766	192
PPFIBP2	SE associated gene	-0.0121854	-0.356626	193
LDHD	SE associated gene	-0.0107056	-0.356012	194
UPP1	SE associated gene	-0.00939629	-0.355469	195
COQ2	SE associated gene	-0.00216958	-0.352468	196
PRODH	SE associated gene	-0.000447393	-0.351752	197
PACSIN1	SE associated gene	0.000413462	-0.351393	198
KMT2A	epi genes	0.00191689	-0.350767	199
GRTP1	SE associated gene	0.00397555	-0.349909	200
IQCC	SE associated gene	0.0170424	-0.344446	201
PKIG	SE associated gene	0.0203194	-0.343072	202
EFHD1	SE associated gene	0.0216458	-0.342515	203
RASSF5	SE associated gene	0.024413	-0.341352	204
IGFBP5	SE associated gene	0.0254811	-0.340903	205
CRISPLD2	SE associated gene	0.0330567	-0.337712	206
DCAF5	SE associated gene	0.0350641	-0.336865	207
SERINC3	SE associated gene	0.0369702	-0.33606	208
ADPRH	SE associated gene	0.0410551	-0.334332	209
CCDC125	SE associated gene	0.0413649	-0.334201	210
JDP2	SE associated gene	0.0416609	-0.334076	211
RARRES1	SE associated gene	0.0433829	-0.333347	212
MTCL1	SE associated gene	0.0463688	-0.332081	213
FAM132B	SE associated gene	0.0483004	-0.331262	214
COL6A1	SE associated gene	0.0571922	-0.327481	215
KAT2A	epi genes	0.0578332	-0.327208	216
SBK1	SE associated gene	0.0582685	-0.327022	217
PLAC8	SE associated gene	0.0593047	-0.326581	218
CLN3	SE associated gene	0.063777	-0.324672	219
VTN	SE associated gene	0.0649732	-0.324161	220
LRRC16A	SE associated gene	0.0662686	-0.323608	221
TBC1D16	SE associated gene	0.0734142	-0.320549	222
IL34	SE associated gene	0.0741063	-0.320252	223
CBX2	SE associated gene	0.075863	-0.319499	224
HOXD1	SE associated gene	0.0774347	-0.318824	225
CGN	SE associated gene	0.0835388	-0.3162	226
KIAA0513	SE associated gene	0.0862544	-0.31503	227
HOXD11	SE associated gene	0.0920759	-0.312519	228
RAP1GAP	SE associated gene	0.0922201	-0.312457	229
GATA2	SE associated gene	0.0922581	-0.31244	230
STRA6	SE associated gene	0.101623	-0.308388	231
SLC9A3R1	SE associated gene	0.112214	-0.303787	232
SMAGP	SE associated gene	0.114566	-0.302763	233
PDCD4	SE associated gene	0.125978	-0.29778	234
ZMYND15	SE associated gene	0.127114	-0.297282	235
BAHD1	SE associated gene	0.129064	-0.296428	236
LCTL	SE associated gene	0.131162	-0.295509	237
TWIST1	epi genes	0.132662	-0.29485	238
RUNX3	SE associated gene	0.133717	-0.294388	239
ZNF713	SE associated gene	0.134264	-0.294148	240
SPICE1	SE associated gene	0.136424	-0.293199	241
SYCP2	SE associated gene	0.136567	-0.293136	242
ADAM12	SE associated gene	0.139514	-0.29184	243
MAPKAPK5	SE associated gene	0.141093	-0.291145	244
ARHGAP31	SE associated gene	0.142259	-0.290632	245
BCL2	Positive control	0.147905	-0.288142	246
RMND5B	SE associated gene	0.148959	-0.287677	247
GUCD1 (C22orf13)	SE associated gene	0.150829	-0.286851	248
BAMBI	SE associated gene	0.155601	-0.28474	249
ZIC1	SE associated gene	0.155745	-0.284676	250
SRC	Positive control	0.158889	-0.283284	251
MAPKAPK2	SE associated gene	0.160337	-0.282642	252
AIF1L	SE associated gene	0.162326	-0.281759	253
INHBB	SE associated gene	0.163066	-0.281431	254
CELSR2	SE associated gene	0.165812	-0.280211	255
TGFB2	SE associated gene	0.169706	-0.278479	256
TP53	Positive control	0.175722	-0.275798	257
UBL7	SE associated gene	0.175917	-0.275711	258
PPM1L	SE associated gene	0.178912	-0.274374	259
SMIM3	#N/A	0.180831	-0.273516	260
CXCL16	SE associated gene	0.181319	-0.273298	261
HDAC4	epi genes	0.187529	-0.270518	262
ABL1	Positive control	0.187619	-0.270478	263
PXMP2	SE associated gene	0.200951	-0.264488	264
SOX13	SE associated gene	0.202369	-0.263849	265
NECAB3	SE associated gene	0.203248	-0.263452	266
TC2N	SE associated gene	0.207851	-0.261375	267
EPS8L1	SE associated gene	0.208283	-0.26118	268
PGAM5	SE associated gene	0.210708	-0.260084	269
NRAS	Positive control	0.211286	-0.259822	270
PPP1R3D	SE associated gene	0.211583	-0.259688	271
KDM4C	epi genes	0.212599	-0.259229	272
KDM4D	epi genes	0.214292	-0.258462	273
DHRS3	SE associated gene	0.215574	-0.257882	274
QRFP	SE associated gene	0.215863	-0.257751	275
LOH12CR1	SE associated gene	0.216827	-0.257314	276
SYT15	SE associated gene	0.222023	-0.254957	277
GOLT1A	SE associated gene	0.224137	-0.253996	278
BATF	SE associated gene	0.226333	-0.252998	279
CRYBA2	SE associated gene	0.226407	-0.252964	280
SIX1	SE associated gene	0.22694	-0.252722	281
TWIST2	epi genes	0.231526	-0.250634	282
CABLES1	SE associated gene	0.233692	-0.249646	283
ZBTB8A	SE associated gene	0.235269	-0.248927	284
FAM46A	SE associated gene	0.235995	-0.248596	285
RARRES3	SE associated gene	0.239784	-0.246864	286
FAM174B	SE associated gene	0.242558	-0.245596	287
DDX3X	SE associated gene	0.242566	-0.245592	288
ARHGAP8	SE associated gene	0.243895	-0.244984	289
SOX11	SE associated gene	0.243995	-0.244938	290
BPGM	SE associated gene	0.244644	-0.244641	291
FOXI1	SE associated gene	0.245191	-0.24439	292
PIK3C2B	SE associated gene	0.247678	-0.243251	293
UNK	SE associated gene	0.254591	-0.240077	294
SMARCD2	SE associated gene	0.25766	-0.238665	295
WWC1	SE associated gene	0.258341	-0.238352	296
GFOD1	SE associated gene	0.261923	-0.236701	297
ASCL2	SE associated gene	0.264027	-0.235731	298
PRR14L	SE associated gene	0.264425	-0.235548	299
SIRT5	SE associated gene	0.26599	-0.234825	300
TP53I11	SE associated gene	0.267184	-0.234274	301
VPS37C	SE associated gene	0.268105	-0.233849	302
UMODL1	SE associated gene	0.269058	-0.233408	303
PPP2R5A	SE associated gene	0.269957	-0.232993	304
DUSP8	SE associated gene	0.271139	-0.232446	305
WHSC1	epi genes	0.273391	-0.231404	306
RHPN2	SE associated gene	0.279025	-0.228793	307
VIM	epi genes	0.281199	-0.227784	308
ATP9A	SE associated gene	0.287125	-0.22503	309
EZH2	epi genes	0.288068	-0.224591	310
SLC12A8	SE associated gene	0.289339	-0.223999	311
MTSS1L	SE associated gene	0.28982	-0.223775	312
BCL2L13	SE associated gene	0.291607	-0.222942	313
DOPEY2	SE associated gene	0.291922	-0.222796	314
GSTM4	SE associated gene	0.294714	-0.221494	315
DTX4	SE associated gene	0.295502	-0.221126	316
PRSS35	SE associated gene	0.298234	-0.21985	317
CYB561	SE associated gene	0.298296	-0.219821	318
GABRP	SE associated gene	0.306249	-0.2161	319
PODXL	SE associated gene	0.306646	-0.215914	320
ATOH8	SE associated gene	0.30947	-0.21459	321
GLYATL1	SE associated gene	0.309589	-0.214534	322
FAIM2	SE associated gene	0.313842	-0.212537	323
RSPH1	SE associated gene	0.317001	-0.211051	324
PROC	SE associated gene	0.318685	-0.210259	325
HEG1	SE associated gene	0.323187	-0.208138	326
RNF144A	SE associated gene	0.325737	-0.206935	327
LPCAT1	SE associated gene	0.326505	-0.206572	328
TMC6	SE associated gene	0.326537	-0.206557	329
MAP3K1	SE associated gene	0.327783	-0.205969	330
MAP3K1	SE associated gene	0.327783	-0.205969	330
CX3CL1	SE associated gene	0.32987	-0.204983	332
MCF2L	SE associated gene	0.332361	-0.203805	333
PTPN4	SE associated gene	0.333824	-0.203113	334
BRD4	epi genes	0.33595	-0.202105	335
RDH13	SE associated gene	0.340857	-0.199779	336
PDS5A	SE associated gene	0.34744	-0.196651	337
EDIL3	SE associated gene	0.34894	-0.195937	338
SYK	SE associated gene	0.348967	-0.195924	339
RBM38	SE associated gene	0.352795	-0.194101	340
TTC6	SE associated gene	0.354791	-0.193149	341
SNAI1	epi genes	0.355093	-0.193005	342
GALNT12	SE associated gene	0.356664	-0.192255	343
LINGO1	SE associated gene	0.360989	-0.19019	344
STXBP2	SE associated gene	0.361218	-0.19008	345
CLIC4	SE associated gene	0.361345	-0.19002	346
IL27	SE associated gene	0.361872	-0.189768	347
CA4	SE associated gene	0.362748	-0.189349	348
NUPR1	SE associated gene	0.364078	-0.188712	349
KDM3A	epi genes	0.367025	-0.187301	350
SULT1A1	SE associated gene	0.367462	-0.187092	351
KDM1B	epi genes	0.36761	-0.187021	352
COQ9	SE associated gene	0.369954	-0.185897	353
KIF12	SE associated gene	0.37624	-0.182879	354
PLEKHA7	SE associated gene	0.385792	-0.178279	355
KCNQ1	SE associated gene	0.385973	-0.178192	356
PPAP2C	SE associated gene	0.387441	-0.177483	357
PDGFRB	SE associated gene	0.387882	-0.177271	358
SHROOM3	SE associated gene	0.388284	-0.177077	359
DNMT3L	SE associated gene	0.388565	-0.176941	360
LRRC75B	SE associated gene	0.38882	-0.176818	361
MAFB	SE associated gene	0.392766	-0.174911	362
ARRB1	SE associated gene	0.394444	-0.174099	363
FOXJ1	SE associated gene	0.397523	-0.172609	364
PRR5	SE associated gene	0.399028	-0.171879	365
CHD1	epi genes	0.399315	-0.17174	366
CLPTM1L	SE associated gene	0.402516	-0.170188	367
MAP3K8	SE associated gene	0.402525	-0.170184	368
TNS3	SE associated gene	0.40314	-0.169885	369
FAS	Positive control	0.403195	-0.169858	370
TMPRSS2	SE associated gene	0.408055	-0.167498	371
TRIM2	SE associated gene	0.408609	-0.167228	372
LY6E	SE associated gene	0.409696	-0.1667	373
CAPN9	SE associated gene	0.411455	-0.165843	374
FAM217B	SE associated gene	0.411996	-0.16558	375
TTC3	SE associated gene	0.412763	-0.165207	376
XBP1	SE associated gene	0.416679	-0.163298	377
FBLN2	SE associated gene	0.418431	-0.162444	378
SERPINB9	SE associated gene	0.419227	-0.162055	379
ZEB1	epi genes	0.422127	-0.160638	380
AZGP1	SE associated gene	0.42214	-0.160632	381
RTKN2	SE associated gene	0.42257	-0.160422	382
VIPR1	SE associated gene	0.424344	-0.159555	383
GPRC5C	SE associated gene	0.424349	-0.159552	384
N4BP3	SE associated gene	0.427411	-0.158054	385
GAL3ST2	SE associated gene	0.427512	-0.158005	386
GOLGA5	SE associated gene	0.428855	-0.157347	387
PLEKHH1	SE associated gene	0.434798	-0.154433	388
OCLN	SE associated gene	0.435642	-0.154019	389
ASS1	SE associated gene	0.435883	-0.1539	390
KSR1	SE associated gene	0.437407	-0.153152	391
MB	SE associated gene	0.437695	-0.15301	392
SNAI2	epi genes	0.439071	-0.152334	393
CAMSAP3	SE associated gene	0.439901	-0.151926	394
APOBR	SE associated gene	0.440001	-0.151877	395
ALX3	SE associated gene	0.446082	-0.148883	396
CBR1	SE associated gene	0.448054	-0.147911	397
RAB20	SE associated gene	0.450625	-0.146643	398
ZIC4	SE associated gene	0.451727	-0.146099	399
NR4A1	SE associated gene	0.460808	-0.141608	400
EFCAB11	SE associated gene	0.460956	-0.141535	401
LIMCH1	SE associated gene	0.474131	-0.134993	402
SAYSD1	SE associated gene	0.476422	-0.133852	403
HOXD4	SE associated gene	0.477843	-0.133144	404
KDM6B	epi genes	0.480146	-0.131996	405
C2CD4D	SE associated gene	0.480287	-0.131926	406
NUAK1	SE associated gene	0.480307	-0.131916	407
SPTSSB	SE associated gene	0.483877	-0.130135	408
RPS6KB1	SE associated gene	0.48638	-0.128884	409
PLEKHF2	SE associated gene	0.486495	-0.128827	410
SYNPO	SE associated gene	0.487607	-0.128271	411
KLHDC7A	SE associated gene	0.489758	-0.127195	412
CASKIN2	SE associated gene	0.489821	-0.127164	413
TMC5	SE associated gene	0.494909	-0.124615	414
CNNM4	SE associated gene	0.495616	-0.124261	415
EED	epi genes	0.497168	-0.123483	416
GGT1	SE associated gene	0.502845	-0.120632	417
GDPD5	SE associated gene	0.510332	-0.116864	418
COL6A3	SE associated gene	0.51281	-0.115615	419
NFKBIZ	SE associated gene	0.514303	-0.114861	420
FAM47E	SE associated gene	0.518598	-0.112693	421
CALM1	SE associated gene	0.518601	-0.112691	422
EPHB2	SE associated gene	0.528879	-0.107488	423
BCOR	SE associated gene	0.532703	-0.105547	424
TMEM116	SE associated gene	0.533866	-0.104956	425
FAM198A	SE associated gene	0.537156	-0.103284	426
PLEKHA6	SE associated gene	0.547582	-0.0979724	427
ST14	SE associated gene	0.549461	-0.0970129	428
SIDT1	SE associated gene	0.549632	-0.0969258	429
CTNNB1	Positive control	0.554479	-0.0944485	430
CHST8	SE associated gene	0.557134	-0.0930892	431
KDM2B	epi genes	0.560599	-0.0913144	432
SLC25A21	SE associated gene	0.563603	-0.0897734	433
COL6A2	SE associated gene	0.575015	-0.0839063	434
KCNK5	SE associated gene	0.582076	-0.0802644	435
CNNM3	SE associated gene	0.586938	-0.077752	436
SERPINB1	SE associated gene	0.590485	-0.0759163	437
TPD52L1	SE associated gene	0.593489	-0.0743599	438
PIM1	SE associated gene	0.596162	-0.0729737	439
SLC37A1	SE associated gene	0.597089	-0.0724929	440
MSX2	SE associated gene	0.598143	-0.0719458	441
INPP5J	SE associated gene	0.602425	-0.0697216	442
PBX1	SE associated gene	0.605121	-0.0683193	443
DDAH1	SE associated gene	0.605217	-0.0682693	444
FAF1	SE associated gene	0.606094	-0.067813	445
HRASLS2	SE associated gene	0.609887	-0.0658372	446
TNFAIP2	SE associated gene	0.615263	-0.0630328	447
FBXO28	SE associated gene	0.626457	-0.057178	448
FIBCD1	SE associated gene	0.628062	-0.0563365	449
ZHX2	SE associated gene	0.632944	-0.053775	450
ADORA2A	SE associated gene	0.63838	-0.0509174	451
DEGS1	SE associated gene	0.640488	-0.0498082	452
SYT17	SE associated gene	0.642894	-0.048541	453
ESRP1	SE associated gene	0.64879	-0.0454315	454
CHST12	SE associated gene	0.654082	-0.0426354	455
SULT1A2	SE associated gene	0.661761	-0.0385697	456
AR	epi genes	0.668681	-0.0348973	457
SRCIN1	SE associated gene	0.674346	-0.0318844	458
GOLPH3	SE associated gene	0.676362	-0.030811	459
DUSP15	SE associated gene	0.683718	-0.0268879	460
ZBTB21	SE associated gene	0.705639	-0.0151425	461
KDM4B	epi genes	0.723168	-0.0056908	462
NTC	NA	0.733675	0	463
ZNF148	SE associated gene	0.739815	0.00333446	464
RB1	Positive control	0.739927	0.00339494	465
EZH1	epi genes	0.759179	0.0138923	466
BRD3	epi genes	0.769154	0.0193564	467
FOXP4	SE associated gene	0.782649	0.0267755	468
APC	Positive control	0.794096	0.0330934	469
TEX36	SE associated gene	0.828518	0.0522271	470
PPIL1	SE associated gene	0.830955	0.0535892	471
EP300	epi genes	0.83879	0.0579756	472
ARHGAP32	SE associated gene	0.860209	0.0700211	473
TOX2	SE associated gene	0.875957	0.0789271	474
CP	SE associated gene	0.884302	0.0836641	475
NINJ1	SE associated gene	0.947557	0.119951	476
HDAC2	epi genes	0.968048	0.131851	477
PTPRJ	SE associated gene	1.09598	0.207743	478
CBS	SE associated gene	#N/A	#N/A	#N/A
RP11-379F4.4	#N/A	#N/A	#N/A	#N/A
WDR52	SE associated gene	#N/A	#N/A	#N/A

## Sheet: SUM149
Gene	Type	SUM149PT lfc	SUM149PT LFC rescaled	SUM149PT drop-out rank
EEF2	Positive control	-1.69245	-1.50775	1
CDK9	epi genes	-1.66138	-1.4887	2
EIF3A	Positive control	-1.56167	-1.42649	3
MYC	Positive control	-1.4266	-1.33968	4
CCT3	Positive control	-1.35276	-1.29101	5
CDK1	Positive control	-1.30694	-1.26038	6
PSMB2	Positive control	-1.27703	-1.24021	7
CCT7	Positive control	-1.25272	-1.22372	8
RPL11	Positive control	-1.16183	-1.16128	9
CCT8	Positive control	-1.09718	-1.11612	10
HDAC3	epi genes	-1.09432	-1.11411	11
WDHD1	SE associated gene	-1.08137	-1.10499	12
PSMD1	Positive control	-1.05621	-1.08719	13
USP39	Positive control	-1.04929	-1.08228	14
RPL23	Positive control	-1.02827	-1.06732	15
EEFSEC	SE associated gene	-0.994214	-1.04296	16
COPS8	SE associated gene	-0.993407	-1.04238	17
RPL36	Positive control	-0.892374	-0.969128	18
WWTR1	Positive control	-0.889982	-0.967376	19
WEE1	Positive control	-0.87442	-0.955964	20
MED1	epi genes	-0.823427	-0.918342	21
NUF2	Positive control	-0.803901	-0.903844	22
CDK7	epi genes	-0.7726	-0.880497	23
MTOR	Positive control	-0.709264	-0.832868	24
EIF3G	Positive control	-0.686208	-0.815402	25
CLTC	SE associated gene	-0.613842	-0.760144	26
SUZ12	epi genes	-0.564247	-0.7219	27
RAD51B	SE associated gene	-0.54766	-0.709042	28
VMP1	SE associated gene	-0.49942	-0.671461	29
RPL10A	Positive control	-0.487661	-0.662259	30
MAD1L1	SE associated gene	-0.430333	-0.617162	31
MCL1	Positive control	-0.407885	-0.5994	32
EIF3B	Positive control	-0.380421	-0.577591	33
KAT2A	epi genes	-0.376571	-0.574526	34
CTCF	epi genes	-0.370686	-0.56984	35
ERMP1	SE associated gene	-0.34611	-0.550225	36
EIF3D	Positive control	-0.28398	-0.50034	37
TMEM65	SE associated gene	-0.272246	-0.490871	38
APC	Positive control	-0.252539	-0.474936	39
MRPS17	SE associated gene	-0.251152	-0.473813	40
DOT1L	epi genes	-0.248301	-0.471503	41
SIM2	SE associated gene	-0.24172	-0.46617	42
SLC9A3R1	SE associated gene	-0.22026	-0.448744	43
NSMCE2	SE associated gene	-0.21411	-0.443742	44
BAMBI	SE associated gene	-0.213575	-0.443306	45
PLK1	Positive control	-0.209697	-0.44015	46
CCND1	SE associated gene	-0.208251	-0.438972	47
TNS3	SE associated gene	-0.204001	-0.43551	48
KARS	Positive control	-0.197513	-0.430221	49
EGFR	SE associated gene	-0.178197	-0.41445	50
BRCA1	Positive control	-0.173649	-0.41073	51
KDM4C	epi genes	-0.171107	-0.408651	52
TUBD1	SE associated gene	-0.167807	-0.40595	53
PGLS	SE associated gene	-0.166375	-0.404778	54
PDS5A	SE associated gene	-0.162705	-0.401773	55
BACE2	SE associated gene	-0.160923	-0.400313	56
NELFCD	SE associated gene	-0.154226	-0.394824	57
MARCKSL1	SE associated gene	-0.151581	-0.392655	58
MPV17L2	SE associated gene	-0.144211	-0.386607	59
EP300	epi genes	-0.14416	-0.386565	60
E2F1	SE associated gene	-0.134531	-0.378655	61
TGFB2	SE associated gene	-0.130743	-0.375541	62
TRIB1	SE associated gene	-0.12409	-0.370067	63
LINGO1	SE associated gene	-0.112304	-0.36036	64
ITGB5	SE associated gene	-0.108001	-0.356813	65
IGFBP5	SE associated gene	-0.104916	-0.354268	66
HOXD1	SE associated gene	-0.0866474	-0.33918	67
ESRP1	SE associated gene	-0.0810056	-0.334514	68
SBK1	SE associated gene	-0.0809741	-0.334488	69
PLXND1	SE associated gene	-0.0749913	-0.329537	70
KDM3B	epi genes	-0.0741435	-0.328835	71
HS6ST1	SE associated gene	-0.0701621	-0.325537	72
PAX9	SE associated gene	-0.0696239	-0.325091	73
COL6A2	SE associated gene	-0.06122	-0.318126	74
MAPK1	Positive control	-0.0594081	-0.316623	75
AKAP10	SE associated gene	-0.0558718	-0.313689	76
PHKG1	SE associated gene	-0.0535252	-0.311741	77
THEM5	SE associated gene	-0.0526011	-0.310974	78
GAL3ST2	SE associated gene	-0.0513058	-0.309899	79
SYT15	SE associated gene	-0.0503705	-0.309122	80
HNRNPAB	SE associated gene	-0.0435545	-0.303461	81
ITGA11	SE associated gene	-0.0432604	-0.303216	82
MAST3	SE associated gene	-0.0397799	-0.300323	83
FAM117A	SE associated gene	-0.0382975	-0.299091	84
CRISPLD2	SE associated gene	-0.0372259	-0.298199	85
RTKN2	SE associated gene	-0.0323375	-0.294133	86
CCDC101	SE associated gene	-0.0296592	-0.291904	87
DDX3X	SE associated gene	-0.0275037	-0.29011	88
ZEB1	epi genes	-0.0274531	-0.290067	89
HEG1	SE associated gene	-0.0223657	-0.285831	90
CARKD	SE associated gene	-0.0187727	-0.282837	91
HDAC11	SE associated gene	-0.0168765	-0.281256	92
USP32	SE associated gene	-0.0161876	-0.280682	93
FAM132B	SE associated gene	-0.0157436	-0.280312	94
KCNC4	SE associated gene	-0.0141339	-0.27897	95
FIBCD1	SE associated gene	-0.0127412	-0.277808	96
PATZ1	SE associated gene	-0.0118635	-0.277076	97
FAM217B	SE associated gene	-0.0104645	-0.275909	98
STRA6	SE associated gene	-0.00748208	-0.273421	99
BCL2	Positive control	-0.00360875	-0.270188	100
MAP2K3	SE associated gene	-0.00343378	-0.270042	101
TTC39A	SE associated gene	-0.00293855	-0.269628	102
EN1	SE associated gene	0.000515384	-0.266744	103
UNK	SE associated gene	0.00195583	-0.265541	104
CRYBA2	SE associated gene	0.00480743	-0.263158	105
KDM5A	epi genes	0.00716694	-0.261186	106
ABL1	Positive control	0.0107671	-0.258176	107
CXCL16	SE associated gene	0.0117331	-0.257368	108
SLC2A10	SE associated gene	0.0124513	-0.256768	109
TATDN1	SE associated gene	0.0139017	-0.255554	110
SALL4	SE associated gene	0.0155919	-0.25414	111
CELSR2	SE associated gene	0.0161791	-0.253649	112
SEC61G	SE associated gene	0.0166499	-0.253255	113
HDAC4	epi genes	0.0217804	-0.248961	114
COQ9	SE associated gene	0.0219261	-0.248839	115
NBPF3	SE associated gene	0.023479	-0.247538	116
PEX13	SE associated gene	0.0251432	-0.246144	117
CLPTM1L	SE associated gene	0.0277943	-0.243924	118
ZCCHC24	SE associated gene	0.0297675	-0.24227	119
KDM1A	epi genes	0.0341274	-0.238616	120
KAT6A	epi genes	0.0368035	-0.236371	121
BOC	SE associated gene	0.0374896	-0.235796	122
ATF3	SE associated gene	0.0375211	-0.23577	123
MAP3K1	SE associated gene	0.0375397	-0.235754	124
MAP3K1	SE associated gene	0.0375397	-0.235754	124
LPCAT1	SE associated gene	0.0385443	-0.234911	126
DNMT1	epi genes	0.0400801	-0.233623	127
SPTSSB	SE associated gene	0.0408132	-0.233008	128
ADAMTS2	SE associated gene	0.0417754	-0.2322	129
BID	SE associated gene	0.0421442	-0.231891	130
FOXS1	SE associated gene	0.0424791	-0.23161	131
SAYSD1	SE associated gene	0.0435318	-0.230726	132
AP1B1	SE associated gene	0.0435743	-0.230691	133
KAT5	epi genes	0.0452347	-0.229297	134
GOLPH3	SE associated gene	0.045574	-0.229012	135
TWIST2	epi genes	0.0493823	-0.225814	136
KCNJ18	SE associated gene	0.0509686	-0.224482	137
PDCD4	SE associated gene	0.0515136	-0.224024	138
ASS1	SE associated gene	0.0516921	-0.223874	139
SMAD6	SE associated gene	0.0524488	-0.223238	140
COL15A1	SE associated gene	0.0525193	-0.223179	141
FAM46A	SE associated gene	0.0529129	-0.222849	142
KDM4B	epi genes	0.0535967	-0.222274	143
TNFAIP2	SE associated gene	0.0541962	-0.22177	144
SULT1A1	SE associated gene	0.0551516	-0.220967	145
ABTB2	SE associated gene	0.0555689	-0.220617	146
ZNRF1	SE associated gene	0.0561404	-0.220136	147
ATG101	SE associated gene	0.0567417	-0.219631	148
EPCAM	SE associated gene	0.0574758	-0.219014	149
CBX8	SE associated gene	0.0580681	-0.218516	150
LDHD	SE associated gene	0.0590737	-0.21767	151
LLGL2	SE associated gene	0.0611376	-0.215935	152
USP22	SE associated gene	0.0618448	-0.21534	153
CAPN9	SE associated gene	0.0641965	-0.213362	154
RASSF5	SE associated gene	0.0646209	-0.213005	155
MSX2	SE associated gene	0.0657234	-0.212078	156
BRCA2	Positive control	0.0668168	-0.211157	157
USP34	SE associated gene	0.0680428	-0.210126	158
UNC13A	SE associated gene	0.0686398	-0.209623	159
ATOH8	SE associated gene	0.0688729	-0.209427	160
PPIF	SE associated gene	0.0708842	-0.207734	161
DHRS3	SE associated gene	0.0729844	-0.205966	162
PSPH	SE associated gene	0.0739081	-0.205188	163
PRSS35	SE associated gene	0.0739602	-0.205144	164
ZBTB8A	SE associated gene	0.0747114	-0.204511	165
GPR19	SE associated gene	0.075278	-0.204034	166
KCNK5	SE associated gene	0.0756692	-0.203705	167
PXMP2	SE associated gene	0.0757746	-0.203616	168
BAHD1	SE associated gene	0.0758764	-0.20353	169
INPP5J	SE associated gene	0.0763072	-0.203167	170
KDM2A	epi genes	0.0769232	-0.202648	171
BTG2	SE associated gene	0.0805424	-0.199599	172
SNAI1	epi genes	0.0815234	-0.198772	173
CYR61	SE associated gene	0.0818726	-0.198478	174
DUSP8	SE associated gene	0.0847213	-0.196076	175
RSPH1	SE associated gene	0.0872015	-0.193985	176
SYNGR2	SE associated gene	0.0883947	-0.192979	177
KCNQ1	SE associated gene	0.0884403	-0.19294	178
GPRIN2	SE associated gene	0.0890629	-0.192415	179
BPGM	SE associated gene	0.0901014	-0.191539	180
CTNNB1	Positive control	0.0908627	-0.190897	181
FBLN2	SE associated gene	0.0920407	-0.189903	182
INSL3	SE associated gene	0.092945	-0.18914	183
IL27	SE associated gene	0.094109	-0.188157	184
DDAH1	SE associated gene	0.0945089	-0.18782	185
GALNT6	SE associated gene	0.0970315	-0.18569	186
RUNX3	SE associated gene	0.0974977	-0.185297	187
BMP4	SE associated gene	0.0980337	-0.184844	188
KAT2B	epi genes	0.0989001	-0.184113	189
PDGFRB	SE associated gene	0.0991134	-0.183932	190
DCAF5	SE associated gene	0.101294	-0.182091	191
SERPINB9	SE associated gene	0.103528	-0.180204	192
VTN	SE associated gene	0.103897	-0.179891	193
PKIG	SE associated gene	0.104846	-0.17909	194
MTSS1L	SE associated gene	0.105664	-0.178399	195
ASCL2	SE associated gene	0.10592	-0.178183	196
TPM1	SE associated gene	0.106427	-0.177754	197
CBR1	SE associated gene	0.106833	-0.177411	198
SHROOM3	SE associated gene	0.107326	-0.176994	199
JDP2	SE associated gene	0.107659	-0.176713	200
MAFB	SE associated gene	0.107706	-0.176673	201
BRD3	epi genes	0.107971	-0.176449	202
CA4	SE associated gene	0.10911	-0.175486	203
KIAA0513	SE associated gene	0.111383	-0.173564	204
CYB561	SE associated gene	0.11403	-0.171326	205
PIM1	SE associated gene	0.115694	-0.169919	206
TWIST1	epi genes	0.11649	-0.169245	207
TMEM241	SE associated gene	0.117781	-0.168153	208
ALDH4A1	SE associated gene	0.118081	-0.167899	209
ZDHHC23	SE associated gene	0.118967	-0.167149	210
CALM1	SE associated gene	0.119697	-0.166532	211
NDUFB9	SE associated gene	0.120261	-0.166054	212
BRD4	epi genes	0.121641	-0.164886	213
ZIC1	SE associated gene	0.121691	-0.164843	214
COL6A3	SE associated gene	0.122377	-0.164263	215
ELF3	SE associated gene	0.123107	-0.163645	216
SRCIN1	SE associated gene	0.124099	-0.162805	217
BCOR	SE associated gene	0.124744	-0.162259	218
WWC1	SE associated gene	0.125921	-0.161262	219
AZGP1	SE associated gene	0.126828	-0.160494	220
GRTP1	SE associated gene	0.126871	-0.160457	221
WHSC1	epi genes	0.127944	-0.159549	222
SYK	SE associated gene	0.128363	-0.159194	223
ARHGAP8	SE associated gene	0.133235	-0.155066	224
EPHB2	SE associated gene	0.133368	-0.154953	225
CASKIN2	SE associated gene	0.134467	-0.154021	226
STXBP2	SE associated gene	0.137129	-0.151764	227
CBX2	SE associated gene	0.137983	-0.151041	228
RARRES1	SE associated gene	0.139966	-0.149359	229
NUPR1	SE associated gene	0.141382	-0.148158	230
PPM1L	SE associated gene	0.143552	-0.146317	231
RSRC1	SE associated gene	0.144937	-0.145141	232
KDM6B	epi genes	0.146654	-0.143685	233
BCDIN3D	SE associated gene	0.146732	-0.143618	234
CHCHD2	SE associated gene	0.146772	-0.143584	235
IL34	SE associated gene	0.14696	-0.143425	236
ALDH3B2	SE associated gene	0.147412	-0.143041	237
NFKBIZ	SE associated gene	0.147872	-0.142651	238
GGT1	SE associated gene	0.148447	-0.142162	239
LCTL	SE associated gene	0.14964	-0.141149	240
PLAC8	SE associated gene	0.150015	-0.140832	241
GABRP	SE associated gene	0.150417	-0.14049	242
CX3CL1	SE associated gene	0.151166	-0.139854	243
GALNT12	SE associated gene	0.151261	-0.139773	244
COQ2	SE associated gene	0.151511	-0.139562	245
CABLES1	SE associated gene	0.154162	-0.137309	246
SUMF2	SE associated gene	0.156385	-0.135421	247
CREBBP	epi genes	0.156804	-0.135065	248
EFHD1	SE associated gene	0.156851	-0.135026	249
CLIC4	SE associated gene	0.156894	-0.134989	250
RAB11FIP1	SE associated gene	0.157013	-0.134888	251
ADORA2A	SE associated gene	0.158159	-0.133914	252
ALX3	SE associated gene	0.160986	-0.131511	253
GUCD1 (C22orf13)	SE associated gene	0.161092	-0.131421	254
PACSIN1	SE associated gene	0.162335	-0.130364	255
CCDC124	SE associated gene	0.162472	-0.130249	256
TRMT12	SE associated gene	0.166134	-0.127135	257
XBP1	SE associated gene	0.166195	-0.127083	258
TOX2	SE associated gene	0.16711	-0.126305	259
TTC3	SE associated gene	0.168994	-0.124702	260
KMT2A	epi genes	0.169045	-0.124659	261
EED	epi genes	0.169252	-0.124482	262
PRODH	SE associated gene	0.169808	-0.124009	263
SLC25A21	SE associated gene	0.170124	-0.123741	264
REPIN1	SE associated gene	0.171168	-0.122852	265
CALD1	SE associated gene	0.172935	-0.121349	266
IQCC	SE associated gene	0.173387	-0.120964	267
RAP1GAP	SE associated gene	0.175173	-0.119443	268
MIF4GD	SE associated gene	0.175609	-0.119072	269
SRC	Positive control	0.176173	-0.118592	270
SLC12A8	SE associated gene	0.176324	-0.118464	271
HMCES(C3orf37 0.38)	SE associated gene	0.178131	-0.116926	272
SMAGP	SE associated gene	0.180695	-0.114742	273
SMARCD2	SE associated gene	0.180865	-0.114597	274
COL6A1	SE associated gene	0.181767	-0.113829	275
GPRC5C	SE associated gene	0.182869	-0.11289	276
RARRES3	SE associated gene	0.184003	-0.111924	277
LIMCH1	SE associated gene	0.184121	-0.111823	278
MTCL1	SE associated gene	0.185887	-0.110319	279
TBC1D16	SE associated gene	0.185948	-0.110266	280
CAMSAP3	SE associated gene	0.185998	-0.110223	281
RBM38	SE associated gene	0.187185	-0.109212	282
CHKA	SE associated gene	0.18722	-0.109182	283
AHCYL1	SE associated gene	0.189619	-0.107137	284
TMPRSS2	SE associated gene	0.189858	-0.106933	285
GSTM4	SE associated gene	0.191151	-0.105831	286
CHD1	epi genes	0.191466	-0.105563	287
BRD2	epi genes	0.191671	-0.105388	288
RAB20	SE associated gene	0.191763	-0.105309	289
EFCAB11	SE associated gene	0.19221	-0.104928	290
KIF12	SE associated gene	0.192387	-0.104777	291
NR4A1	SE associated gene	0.19253	-0.104655	292
HOXD3	SE associated gene	0.193323	-0.103979	293
CNNM3	SE associated gene	0.19341	-0.103905	294
GOLT1A	SE associated gene	0.193864	-0.103518	295
SLC37A1	SE associated gene	0.194614	-0.102878	296
MAP3K8	SE associated gene	0.19524	-0.102344	297
ARHGAP32	SE associated gene	0.198287	-0.0997442	298
SQLE	SE associated gene	0.201646	-0.0968779	299
ST14	SE associated gene	0.20204	-0.0965414	300
EZH1	epi genes	0.20381	-0.0950304	301
RASD2	SE associated gene	0.203828	-0.0950156	302
BCL2L13	SE associated gene	0.203915	-0.0949413	303
GRHL1	SE associated gene	0.207346	-0.0920111	304
ADPRH	SE associated gene	0.208183	-0.0912962	305
H3F3B	SE associated gene	0.208939	-0.0906505	306
NECAB3	SE associated gene	0.211658	-0.0883274	307
RABEP1	SE associated gene	0.212847	-0.0873113	308
TRAFD1	SE associated gene	0.213676	-0.0866032	309
FAM198A	SE associated gene	0.213823	-0.0864773	310
ARHGAP31	SE associated gene	0.215421	-0.0851115	311
RDH13	SE associated gene	0.216669	-0.0840454	312
LRRC75B	SE associated gene	0.216973	-0.0837851	313
SYT17	SE associated gene	0.217575	-0.0832704	314
GDPD5	SE associated gene	0.217862	-0.0830255	315
HEATR6	SE associated gene	0.21825	-0.0826938	316
LOH12CR1	SE associated gene	0.218255	-0.0826891	317
SPICE1	SE associated gene	0.218585	-0.0824073	318
MTMR12	SE associated gene	0.218797	-0.082226	319
NINJ1	SE associated gene	0.223712	-0.0780225	320
TPPP	SE associated gene	0.224522	-0.0773293	321
AR	epi genes	0.225801	-0.076235	322
NRAS	Positive control	0.225926	-0.0761281	323
GATA2	SE associated gene	0.226531	-0.0756104	324
WNT10A	SE associated gene	0.226694	-0.0754705	325
PIK3C2B	SE associated gene	0.227352	-0.0749079	326
SERINC3	SE associated gene	0.227726	-0.0745879	327
PTPN4	SE associated gene	0.228057	-0.0743042	328
C2CD4C	SE associated gene	0.229001	-0.0734967	329
TPRG1	SE associated gene	0.229099	-0.0734122	330
SOX11	SE associated gene	0.229218	-0.0733105	331
PIK3CA	Positive control	0.230275	-0.0724064	332
TMC5	SE associated gene	0.230939	-0.0718372	333
FAM174B	SE associated gene	0.231109	-0.0716922	334
CGN	SE associated gene	0.232229	-0.0707329	335
VOPP1	SE associated gene	0.232559	-0.0704509	336
KDM3A	epi genes	0.233285	-0.0698291	337
JAK3	SE associated gene	0.233866	-0.0693317	338
GADD45G	SE associated gene	0.234468	-0.068816	339
ANXA11	SE associated gene	0.234572	-0.0687268	340
CCDC125	SE associated gene	0.236064	-0.0674491	341
TEX36	SE associated gene	0.236338	-0.0672144	342
SERPINB1	SE associated gene	0.237643	-0.0660962	343
SLC12A7	SE associated gene	0.237846	-0.0659222	344
ZMYND15	SE associated gene	0.238117	-0.06569	345
FAIM2	SE associated gene	0.241069	-0.0631614	346
DLX3	SE associated gene	0.24237	-0.0620462	347
CHST8	SE associated gene	0.242798	-0.0616794	348
SIX1	SE associated gene	0.24284	-0.0616431	349
CLN3	SE associated gene	0.243298	-0.0612508	350
GPR124	SE associated gene	0.244915	-0.059865	351
HDAC1	epi genes	0.246231	-0.0587361	352
PPP1R3D	SE associated gene	0.246363	-0.0586233	353
KIAA1324	SE associated gene	0.247463	-0.0576798	354
TMEM11	SE associated gene	0.247649	-0.0575205	355
KSR1	SE associated gene	0.248089	-0.0571431	356
GLYATL1	SE associated gene	0.248507	-0.0567851	357
ZNF148	SE associated gene	0.250147	-0.055378	358
CEBPA	SE associated gene	0.251045	-0.0546083	359
PLEKHF2	SE associated gene	0.25262	-0.0532572	360
DTX4	SE associated gene	0.252951	-0.0529731	361
GGT6	SE associated gene	0.253097	-0.0528477	362
RNF139	SE associated gene	0.253159	-0.0527944	363
OCLN	SE associated gene	0.255328	-0.0509334	364
TDRKH	SE associated gene	0.256305	-0.0500947	365
VPS37C	SE associated gene	0.25915	-0.0476529	366
SIRT5	SE associated gene	0.263226	-0.0441534	367
PDE9A	SE associated gene	0.267001	-0.0409106	368
FAS	Positive control	0.268913	-0.0392673	369
PPAP2C	SE associated gene	0.269228	-0.0389969	370
PODXL	SE associated gene	0.27114	-0.0373535	371
UMODL1	SE associated gene	0.271996	-0.0366184	372
NATD1	SE associated gene	0.272618	-0.0360832	373
ZNF713	SE associated gene	0.274947	-0.0340815	374
MB	SE associated gene	0.275041	-0.0340004	375
SNAI2	epi genes	0.275051	-0.0339917	376
AIF1L	SE associated gene	0.278164	-0.0313143	377
QRFP	SE associated gene	0.285715	-0.0248183	378
SULT1A2	SE associated gene	0.286201	-0.0243998	379
PLEKHH1	SE associated gene	0.286963	-0.0237436	380
CCDC40	SE associated gene	0.288407	-0.0225008	381
UPP1	SE associated gene	0.288655	-0.0222874	382
KIAA0196	SE associated gene	0.290043	-0.0210918	383
PPFIBP2	SE associated gene	0.290245	-0.0209183	384
DUSP15	SE associated gene	0.291266	-0.0200392	385
MCF2L	SE associated gene	0.291323	-0.0199899	386
N4BP3	SE associated gene	0.29145	-0.0198802	387
LY6E	SE associated gene	0.29152	-0.0198199	388
KCNJ12	SE associated gene	0.292057	-0.0193581	389
TP53	Positive control	0.297487	-0.0146799	390
VIPR1	SE associated gene	0.297763	-0.0144422	391
GOLGA5	SE associated gene	0.29963	-0.0128333	392
KDM5B	epi genes	0.300338	-0.0122235	393
FAM47E	SE associated gene	0.300641	-0.0119621	394
SIDT1	SE associated gene	0.305112	-0.0081077	395
PPIL1	SE associated gene	0.310226	-0.00369653	396
TMC6	SE associated gene	0.310259	-0.00366779	397
GJC3	SE associated gene	0.310853	-0.00315543	398
KDM4A	epi genes	0.311618	-0.00249581	399
FBXO28	SE associated gene	0.311637	-0.00247941	400
GFOD1	SE associated gene	0.31202	-0.0021488	401
TTC6	SE associated gene	0.314415	-8.20371e-05	402
NTC	NA	0.31451	0	403
TRPS1	SE associated gene	0.315104	0.000512882	404
DOPEY2	SE associated gene	0.317147	0.00227622	405
PPP2R5A	SE associated gene	0.317377	0.0024746	406
C2CD4D	SE associated gene	0.318305	0.00327607	407
ATP9A	SE associated gene	0.323073	0.00739368	408
SMIM3	#N/A	0.32448	0.00860919	409
ZBTB21	SE associated gene	0.324578	0.00869355	410
BMF	SE associated gene	0.32574	0.00969784	411
DEGS1	SE associated gene	0.329675	0.0130975	412
CP	SE associated gene	0.330377	0.0137045	413
FOXI1	SE associated gene	0.33091	0.0141656	414
CNNM4	SE associated gene	0.331094	0.0143247	415
HOXD4	SE associated gene	0.33235	0.0154099	416
RNF144A	SE associated gene	0.332872	0.0158613	417
RPS6KA5	SE associated gene	0.332967	0.0159439	418
SPDEF	SE associated gene	0.334555	0.0173168	419
MAPKAPK2	SE associated gene	0.33696	0.0193963	420
PRR5	SE associated gene	0.3379	0.0202092	421
PLEKHA7	SE associated gene	0.338778	0.0209692	422
SYCP2	SE associated gene	0.341207	0.02307	423
KDM4D	epi genes	0.341776	0.0235628	424
AKT1	Positive control	0.342253	0.0239756	425
BATF	SE associated gene	0.343925	0.0254224	426
KDM1B	epi genes	0.345069	0.0264122	427
KLHDC7A	SE associated gene	0.346197	0.0273887	428
UBL7	SE associated gene	0.351697	0.0321513	429
VIM	epi genes	0.356005	0.0358833	430
ADAM12	SE associated gene	0.356154	0.0360125	431
FAF1	SE associated gene	0.357214	0.0369306	432
TC2N	SE associated gene	0.362399	0.0414248	433
EZH2	epi genes	0.364388	0.0431495	434
KDM2B	epi genes	0.368612	0.0468125	435
SMEK1	SE associated gene	0.370114	0.0481159	436
INHBB	SE associated gene	0.37025	0.0482339	437
HOXD11	SE associated gene	0.371452	0.0492765	438
HDAC2	epi genes	0.371983	0.0497372	439
LANCL2	SE associated gene	0.374362	0.0518014	440
PGAM5	SE associated gene	0.376459	0.0536216	441
ATM	Positive control	0.376567	0.0537158	442
HRASLS2	SE associated gene	0.379657	0.0563987	443
FOXA1	SE associated gene	0.380377	0.0570239	444
RB1	Positive control	0.38044	0.0570782	445
EPS8L1	SE associated gene	0.380508	0.0571372	446
RHPN2	SE associated gene	0.383452	0.0596944	447
EPHB3	SE associated gene	0.385019	0.0610557	448
NUAK1	SE associated gene	0.389359	0.0648263	449
TRIM2	SE associated gene	0.391612	0.0667848	450
RPS6KB1	SE associated gene	0.392773	0.067794	451
SOX13	SE associated gene	0.398987	0.0731978	452
FOXJ1	SE associated gene	0.399148	0.0733376	453
RMND5B	SE associated gene	0.400023	0.0740987	454
ARID5B	SE associated gene	0.402832	0.076543	455
TPD52L1	SE associated gene	0.403184	0.0768491	456
PROC	SE associated gene	0.409004	0.0819152	457
ARRB1	SE associated gene	0.412965	0.0853642	458
FUT8	SE associated gene	0.413299	0.0856552	459
FOXP4	SE associated gene	0.421044	0.0924026	460
TMEM116	SE associated gene	0.423006	0.0941133	461
PLEKHA6	SE associated gene	0.430978	0.101065	462
LRRC16A	SE associated gene	0.440061	0.108992	463
TP53I11	SE associated gene	0.443972	0.112406	464
ZIC4	SE associated gene	0.450533	0.118138	465
PTPRJ	SE associated gene	0.462792	0.128856	466
DNMT3L	SE associated gene	0.479382	0.143379	467
PRR14L	SE associated gene	0.483777	0.14723	468
APOBR	SE associated gene	0.492078	0.154507	469
EDIL3	SE associated gene	0.505657	0.166422	470
KDM6A	epi genes	0.521606	0.180435	471
CHST12	SE associated gene	0.521966	0.180751	472
ZHX2	SE associated gene	0.533927	0.191273	473
ID2	SE associated gene	0.540912	0.197422	474
MAPKAPK5	SE associated gene	0.560724	0.214882	475
PBX1	SE associated gene	0.569321	0.222468	476
KRAS	Positive control	0.635197	0.280766	477
SYNPO	SE associated gene	0.683499	0.323704	478
CBS	SE associated gene	#N/A	#N/A	#N/A
RP11-379F4.4	#N/A	#N/A	#N/A	#N/A
WDR52	SE associated gene	#N/A	#N/A	#N/A

## Sheet: hTERT-HME
Gene	Type	HMEC lfc	HMEC LFC rescaled	HMEC drop-out rank
EEF2	Positive control	-5.35062	-1.12877	1
RPL23	Positive control	-4.85289	-1.12103	2
CDK9	epi genes	-4.35152	-1.11009	3
RPL11	Positive control	-4.33252	-1.10959	4
CCT7	Positive control	-4.19331	-1.10579	5
MYC	Positive control	-4.13027	-1.10395	6
PSMB2	Positive control	-3.58667	-1.08435	7
EIF3A	Positive control	-3.16881	-1.06368	8
WEE1	Positive control	-3.03041	-1.05548	9
CCT8	Positive control	-2.71913	-1.03412	10
RPL10A	Positive control	-2.61601	-1.02605	11
CDK1	Positive control	-2.59213	-1.02411	12
MTOR	Positive control	-2.26386	-0.994152	13
CCT3	Positive control	-2.24167	-0.991896	14
NUF2	Positive control	-1.99525	-0.964646	15
PLK1	Positive control	-1.85508	-0.947209	16
WDHD1	SE associated gene	-1.8491	-0.946431	17
NDUFB9	SE associated gene	-1.81393	-0.941802	18
EIF3D	Positive control	-1.80842	-0.941069	19
EIF3G	Positive control	-1.65538	-0.919683	20
HDAC3	epi genes	-1.60853	-0.912738	21
KAT5	epi genes	-1.59272	-0.910349	22
PSMD1	Positive control	-1.59186	-0.910219	23
USP39	Positive control	-1.48123	-0.892873	24
KDM2A	epi genes	-1.36384	-0.873204	25
EIF3B	Positive control	-1.29619	-0.861253	26
MAD1L1	SE associated gene	-1.28352	-0.858963	27
CDK7	epi genes	-1.23577	-0.850184	28
NSMCE2	SE associated gene	-1.23541	-0.850117	29
PGLS	SE associated gene	-1.01566	-0.806537	30
CTCF	epi genes	-0.977097	-0.79833	31
EEFSEC	SE associated gene	-0.971332	-0.797088	32
BRD2	epi genes	-0.954047	-0.793341	33
PIK3CA	Positive control	-0.925327	-0.787037	34
COPS8	SE associated gene	-0.912903	-0.78428	35
RPL36	Positive control	-0.887558	-0.778597	36
CLTC	SE associated gene	-0.759426	-0.748662	37
AKT1	Positive control	-0.62158	-0.714126	38
VMP1	SE associated gene	-0.594826	-0.707133	39
DOT1L	epi genes	-0.556882	-0.697051	40
SQLE	SE associated gene	-0.351188	-0.638923	41
BRCA1	Positive control	-0.342068	-0.636207	42
TUBD1	SE associated gene	-0.269532	-0.61417	43
EGFR	SE associated gene	-0.261461	-0.61167	44
WWTR1	Positive control	-0.201883	-0.592916	45
MED1	epi genes	-0.189746	-0.58903	46
SNAI2	epi genes	-0.160454	-0.57956	47
EED	epi genes	-0.0768497	-0.55181	48
ZEB1	epi genes	-0.0738804	-0.550805	49
SUZ12	epi genes	-0.067708	-0.54871	50
KARS	Positive control	-0.0618623	-0.546721	51
GPRIN2	SE associated gene	-0.0206285	-0.53254	52
PDS5A	SE associated gene	-0.00408726	-0.526776	53
SEC61G	SE associated gene	0.0022853	-0.524544	54
BOC	SE associated gene	0.0576601	-0.504878	55
DDX3X	SE associated gene	0.0785361	-0.497338	56
CCDC101	SE associated gene	0.104754	-0.487768	57
KMT2A	epi genes	0.113805	-0.484439	58
BRCA2	Positive control	0.115242	-0.483909	59
KDM4A	epi genes	0.166653	-0.464736	60
COQ2	SE associated gene	0.193972	-0.454372	61
CCND1	SE associated gene	0.20195	-0.451323	62
HDAC11	SE associated gene	0.212783	-0.447166	63
MAP2K3	SE associated gene	0.241112	-0.436203	64
MARCKSL1	SE associated gene	0.253656	-0.431306	65
CHCHD2	SE associated gene	0.262863	-0.427696	66
AHCYL1	SE associated gene	0.313749	-0.407487	67
KCNC4	SE associated gene	0.327749	-0.401852	68
LLGL2	SE associated gene	0.329833	-0.401011	69
BRD4	epi genes	0.334594	-0.399085	70
KAT2A	epi genes	0.366925	-0.385909	71
ALX3	SE associated gene	0.384847	-0.37853	72
PPIF	SE associated gene	0.387221	-0.377548	73
E2F1	SE associated gene	0.396757	-0.373596	74
SIM2	SE associated gene	0.398512	-0.372867	75
SYT15	SE associated gene	0.420837	-0.363548	76
MCL1	Positive control	0.424204	-0.362135	77
KDM5A	epi genes	0.426482	-0.361178	78
MRPS17	SE associated gene	0.428178	-0.360465	79
ATM	Positive control	0.442387	-0.354473	80
USP32	SE associated gene	0.456034	-0.348685	81
UBL7	SE associated gene	0.466366	-0.344282	82
NELFCD	SE associated gene	0.475077	-0.340555	83
NBPF3	SE associated gene	0.481966	-0.3376	84
BMP4	SE associated gene	0.495589	-0.33173	85
KDM1A	epi genes	0.498041	-0.330671	86
MIF4GD	SE associated gene	0.502184	-0.328878	87
HNRNPAB	SE associated gene	0.509784	-0.325581	88
AKAP10	SE associated gene	0.515502	-0.323095	89
ALDH3B2	SE associated gene	0.538471	-0.31305	90
KAT6A	epi genes	0.551691	-0.307228	91
TRIB1	SE associated gene	0.557146	-0.304816	92
BPGM	SE associated gene	0.573776	-0.297434	93
PHKG1	SE associated gene	0.584943	-0.292451	94
CBX2	SE associated gene	0.58579	-0.292072	95
OCLN	SE associated gene	0.589171	-0.290558	96
SULT1A2	SE associated gene	0.594424	-0.288203	97
KDM4B	epi genes	0.597163	-0.286973	98
DNMT1	epi genes	0.599476	-0.285933	99
SUMF2	SE associated gene	0.605181	-0.283365	100
ITGA11	SE associated gene	0.606383	-0.282823	101
SALL4	SE associated gene	0.614855	-0.278996	102
SIX1	SE associated gene	0.615078	-0.278895	103
VOPP1	SE associated gene	0.619708	-0.276799	104
SYNGR2	SE associated gene	0.621082	-0.276176	105
GALNT6	SE associated gene	0.622966	-0.275322	106
ATG101	SE associated gene	0.623206	-0.275213	107
ITGB5	SE associated gene	0.625482	-0.274179	108
KDM3B	epi genes	0.62765	-0.273195	109
FAM117A	SE associated gene	0.629309	-0.27244	110
RARRES1	SE associated gene	0.641463	-0.266899	111
LANCL2	SE associated gene	0.643111	-0.266146	112
JAK3	SE associated gene	0.649942	-0.263018	113
HEATR6	SE associated gene	0.650877	-0.26259	114
DUSP8	SE associated gene	0.655485	-0.260475	115
CYB561	SE associated gene	0.659988	-0.258405	116
PPP1R3D	SE associated gene	0.664159	-0.256484	117
ZDHHC23	SE associated gene	0.664902	-0.256141	118
BID	SE associated gene	0.665705	-0.255771	119
BATF	SE associated gene	0.680116	-0.249108	120
KIAA0196	SE associated gene	0.686085	-0.246338	121
PIK3C2B	SE associated gene	0.686382	-0.2462	122
KCNJ12	SE associated gene	0.69496	-0.242208	123
PDCD4	SE associated gene	0.700198	-0.239764	124
LDHD	SE associated gene	0.700323	-0.239705	125
KIAA1324	SE associated gene	0.702625	-0.23863	126
MAST3	SE associated gene	0.70288	-0.23851	127
GPR124	SE associated gene	0.70438	-0.237809	128
BTG2	SE associated gene	0.706	-0.237051	129
GATA2	SE associated gene	0.706395	-0.236866	130
SERPINB9	SE associated gene	0.711999	-0.23424	131
CAPN9	SE associated gene	0.716362	-0.232192	132
HMCES(C3orf37 0.38)	SE associated gene	0.716443	-0.232154	133
TOX2	SE associated gene	0.71721	-0.231793	134
CRISPLD2	SE associated gene	0.717439	-0.231686	135
TWIST1	epi genes	0.717982	-0.23143	136
SRC	Positive control	0.718986	-0.230958	137
RBM38	SE associated gene	0.721126	-0.229951	138
FAF1	SE associated gene	0.724193	-0.228507	139
RHPN2	SE associated gene	0.724758	-0.228241	140
SERPINB1	SE associated gene	0.726498	-0.22742	141
BAHD1	SE associated gene	0.728658	-0.226401	142
TRMT12	SE associated gene	0.731426	-0.225094	143
NFKBIZ	SE associated gene	0.733791	-0.223976	144
NATD1	SE associated gene	0.734299	-0.223736	145
JDP2	SE associated gene	0.735208	-0.223306	146
SMAD6	SE associated gene	0.736187	-0.222843	147
TATDN1	SE associated gene	0.736272	-0.222803	148
PLXND1	SE associated gene	0.736498	-0.222696	149
HOXD1	SE associated gene	0.736654	-0.222622	150
TTC3	SE associated gene	0.739497	-0.221275	151
ZBTB8A	SE associated gene	0.739512	-0.221268	152
AZGP1	SE associated gene	0.741442	-0.220354	153
CHKA	SE associated gene	0.746193	-0.218099	154
DLX3	SE associated gene	0.74997	-0.216303	155
ST14	SE associated gene	0.750194	-0.216197	156
SPDEF	SE associated gene	0.751015	-0.215806	157
SYK	SE associated gene	0.752104	-0.215288	158
BCDIN3D	SE associated gene	0.752699	-0.215005	159
CLIC4	SE associated gene	0.754792	-0.214008	160
ATF3	SE associated gene	0.756396	-0.213244	161
FAM198A	SE associated gene	0.757515	-0.21271	162
HS6ST1	SE associated gene	0.75879	-0.212102	163
RSRC1	SE associated gene	0.761739	-0.210694	164
ERMP1	SE associated gene	0.76193	-0.210603	165
TMEM11	SE associated gene	0.76199	-0.210573	166
IGFBP5	SE associated gene	0.763001	-0.210091	167
CEBPA	SE associated gene	0.764692	-0.209282	168
CARKD	SE associated gene	0.769611	-0.206928	169
SMEK1	SE associated gene	0.769931	-0.206774	170
ID2	SE associated gene	0.770784	-0.206366	171
INPP5J	SE associated gene	0.771006	-0.20626	172
TMEM241	SE associated gene	0.772041	-0.205763	173
TPRG1	SE associated gene	0.772523	-0.205532	174
STRA6	SE associated gene	0.774846	-0.204418	175
PXMP2	SE associated gene	0.775304	-0.204198	176
CELSR2	SE associated gene	0.775887	-0.203918	177
APC	Positive control	0.776738	-0.203509	178
KDM4C	epi genes	0.778246	-0.202785	179
UNK	SE associated gene	0.779163	-0.202344	180
SMARCD2	SE associated gene	0.7844	-0.199824	181
SERINC3	SE associated gene	0.785678	-0.199209	182
RAP1GAP	SE associated gene	0.786323	-0.198898	183
PLEKHA7	SE associated gene	0.786351	-0.198884	184
FAIM2	SE associated gene	0.786396	-0.198863	185
COL15A1	SE associated gene	0.788353	-0.197919	186
TRAFD1	SE associated gene	0.790273	-0.196993	187
DHRS3	SE associated gene	0.790892	-0.196694	188
SLC2A10	SE associated gene	0.795084	-0.194669	189
FOXJ1	SE associated gene	0.797899	-0.193307	190
QRFP	SE associated gene	0.798325	-0.193101	191
CTNNB1	Positive control	0.798951	-0.192798	192
RABEP1	SE associated gene	0.799055	-0.192748	193
SLC12A8	SE associated gene	0.799753	-0.19241	194
RASSF5	SE associated gene	0.801985	-0.191328	195
LCTL	SE associated gene	0.803416	-0.190635	196
FOXP4	SE associated gene	0.803581	-0.190555	197
FOXA1	SE associated gene	0.805775	-0.18949	198
UNC13A	SE associated gene	0.806458	-0.189159	199
CGN	SE associated gene	0.808519	-0.188158	200
TNFAIP2	SE associated gene	0.810153	-0.187364	201
CAMSAP3	SE associated gene	0.815183	-0.184917	202
IL34	SE associated gene	0.815744	-0.184644	203
ASCL2	SE associated gene	0.816051	-0.184494	204
DCAF5	SE associated gene	0.817147	-0.18396	205
ZNF148	SE associated gene	0.817331	-0.18387	206
ZCCHC24	SE associated gene	0.817504	-0.183786	207
EPHB3	SE associated gene	0.818432	-0.183334	208
RAD51B	SE associated gene	0.820573	-0.18229	209
SPTSSB	SE associated gene	0.823358	-0.180931	210
USP22	SE associated gene	0.825488	-0.17989	211
PACSIN1	SE associated gene	0.825751	-0.179761	212
PLEKHA6	SE associated gene	0.826609	-0.179342	213
ADPRH	SE associated gene	0.827067	-0.179118	214
MAP3K1	SE associated gene	0.827181	-0.179062	215
MAP3K1	SE associated gene	0.827181	-0.179062	215
RNF144A	SE associated gene	0.827379	-0.178965	217
PROC	SE associated gene	0.828298	-0.178516	218
IQCC	SE associated gene	0.829173	-0.178087	219
EFCAB11	SE associated gene	0.829871	-0.177746	220
NECAB3	SE associated gene	0.831391	-0.177002	221
PLEKHH1	SE associated gene	0.831733	-0.176834	222
PEX13	SE associated gene	0.832132	-0.176639	223
H3F3B	SE associated gene	0.832971	-0.176228	224
C2CD4D	SE associated gene	0.834754	-0.175354	225
KCNJ18	SE associated gene	0.836117	-0.174685	226
GDPD5	SE associated gene	0.836951	-0.174276	227
FOXS1	SE associated gene	0.837176	-0.174166	228
VTN	SE associated gene	0.839018	-0.173261	229
KAT2B	epi genes	0.843006	-0.171302	230
CX3CL1	SE associated gene	0.844129	-0.170749	231
KDM2B	epi genes	0.844629	-0.170503	232
RPS6KA5	SE associated gene	0.84471	-0.170464	233
TMPRSS2	SE associated gene	0.845879	-0.169888	234
ABL1	Positive control	0.8501	-0.167809	235
HOXD11	SE associated gene	0.851071	-0.16733	236
FAS	Positive control	0.851779	-0.166981	237
KDM1B	epi genes	0.852645	-0.166554	238
CP	SE associated gene	0.858954	-0.163437	239
EPS8L1	SE associated gene	0.860386	-0.162729	240
RASD2	SE associated gene	0.860419	-0.162713	241
MAPKAPK2	SE associated gene	0.861282	-0.162285	242
ARID5B	SE associated gene	0.861873	-0.161993	243
PPFIBP2	SE associated gene	0.862601	-0.161633	244
ZNRF1	SE associated gene	0.863923	-0.160978	245
ATOH8	SE associated gene	0.867955	-0.158979	246
SLC9A3R1	SE associated gene	0.868912	-0.158504	247
RAB20	SE associated gene	0.869847	-0.15804	248
SAYSD1	SE associated gene	0.869855	-0.158036	249
TP53I11	SE associated gene	0.870853	-0.157541	250
TWIST2	epi genes	0.872531	-0.156707	251
FIBCD1	SE associated gene	0.876387	-0.15479	252
FUT8	SE associated gene	0.876748	-0.15461	253
MSX2	SE associated gene	0.878817	-0.15358	254
ZIC1	SE associated gene	0.879037	-0.153471	255
ATP9A	SE associated gene	0.880254	-0.152864	256
SNAI1	epi genes	0.880625	-0.15268	257
CXCL16	SE associated gene	0.884097	-0.150949	258
BMF	SE associated gene	0.885365	-0.150316	259
ESRP1	SE associated gene	0.887988	-0.149006	260
PODXL	SE associated gene	0.888177	-0.148912	261
SPICE1	SE associated gene	0.888457	-0.148772	262
PDGFRB	SE associated gene	0.88867	-0.148665	263
EN1	SE associated gene	0.890284	-0.147859	264
CCDC40	SE associated gene	0.890387	-0.147807	265
LOH12CR1	SE associated gene	0.890868	-0.147567	266
GABRP	SE associated gene	0.890953	-0.147524	267
ZHX2	SE associated gene	0.891058	-0.147472	268
PTPN4	SE associated gene	0.892281	-0.14686	269
GRTP1	SE associated gene	0.89267	-0.146665	270
CBR1	SE associated gene	0.892729	-0.146636	271
PATZ1	SE associated gene	0.893136	-0.146432	272
CLN3	SE associated gene	0.894502	-0.145749	273
HOXD3	SE associated gene	0.895194	-0.145402	274
ZNF713	SE associated gene	0.895792	-0.145103	275
HDAC4	epi genes	0.895842	-0.145078	276
COL6A2	SE associated gene	0.896213	-0.144892	277
HDAC1	epi genes	0.897424	-0.144285	278
KSR1	SE associated gene	0.897508	-0.144243	279
ARHGAP31	SE associated gene	0.897764	-0.144114	280
KDM5B	epi genes	0.900552	-0.142716	281
EFHD1	SE associated gene	0.900782	-0.142601	282
RUNX3	SE associated gene	0.902271	-0.141853	283
PRR14L	SE associated gene	0.9043	-0.140835	284
GALNT12	SE associated gene	0.905297	-0.140333	285
MTCL1	SE associated gene	0.905761	-0.140101	286
KLHDC7A	SE associated gene	0.90585	-0.140056	287
PRR5	SE associated gene	0.906408	-0.139775	288
TEX36	SE associated gene	0.906848	-0.139554	289
SYCP2	SE associated gene	0.90714	-0.139407	290
TMEM116	SE associated gene	0.907373	-0.13929	291
ARHGAP8	SE associated gene	0.907611	-0.13917	292
CYR61	SE associated gene	0.910246	-0.137844	293
ADAM12	SE associated gene	0.912287	-0.136816	294
GUCD1 (C22orf13)	SE associated gene	0.912585	-0.136667	295
UPP1	SE associated gene	0.912716	-0.1366	296
FAM46A	SE associated gene	0.913011	-0.136452	297
CCDC124	SE associated gene	0.913133	-0.13639	298
TNS3	SE associated gene	0.91344	-0.136236	299
BACE2	SE associated gene	0.914966	-0.135466	300
KCNQ1	SE associated gene	0.91737	-0.134253	301
TDRKH	SE associated gene	0.918879	-0.133492	302
MTSS1L	SE associated gene	0.920169	-0.132841	303
REPIN1	SE associated gene	0.920488	-0.132679	304
COQ9	SE associated gene	0.920825	-0.132509	305
TTC39A	SE associated gene	0.921766	-0.132033	306
WHSC1	epi genes	0.925341	-0.130226	307
SRCIN1	SE associated gene	0.926475	-0.129652	308
SULT1A1	SE associated gene	0.927139	-0.129315	309
PDE9A	SE associated gene	0.928143	-0.128807	310
SLC37A1	SE associated gene	0.928315	-0.12872	311
DTX4	SE associated gene	0.929332	-0.128204	312
INSL3	SE associated gene	0.9299	-0.127917	313
LPCAT1	SE associated gene	0.930364	-0.127682	314
SMIM3	#N/A	0.93105	-0.127334	315
GJC3	SE associated gene	0.931184	-0.127266	316
CA4	SE associated gene	0.931599	-0.127056	317
GFOD1	SE associated gene	0.931665	-0.127022	318
BAMBI	SE associated gene	0.932537	-0.12658	319
AIF1L	SE associated gene	0.934171	-0.12575	320
AP1B1	SE associated gene	0.935568	-0.125041	321
VIPR1	SE associated gene	0.938958	-0.123319	322
FOXI1	SE associated gene	0.939434	-0.123077	323
NUAK1	SE associated gene	0.939794	-0.122894	324
TMC6	SE associated gene	0.940394	-0.122589	325
COL6A1	SE associated gene	0.94096	-0.122301	326
ASS1	SE associated gene	0.941072	-0.122244	327
CRYBA2	SE associated gene	0.946814	-0.11932	328
PPM1L	SE associated gene	0.947054	-0.119197	329
TC2N	SE associated gene	0.950883	-0.117244	330
CBX8	SE associated gene	0.952528	-0.116404	331
GPR19	SE associated gene	0.954095	-0.115604	332
RTKN2	SE associated gene	0.954145	-0.115578	333
ALDH4A1	SE associated gene	0.956007	-0.114627	334
LRRC16A	SE associated gene	0.957087	-0.114074	335
LINGO1	SE associated gene	0.957801	-0.113709	336
CHST8	SE associated gene	0.958382	-0.113412	337
THEM5	SE associated gene	0.959251	-0.112967	338
BCL2	Positive control	0.960864	-0.112141	339
TPD52L1	SE associated gene	0.961489	-0.111821	340
GADD45G	SE associated gene	0.962827	-0.111135	341
PKIG	SE associated gene	0.964081	-0.110492	342
FAM217B	SE associated gene	0.96465	-0.110201	343
INHBB	SE associated gene	0.964976	-0.110033	344
PAX9	SE associated gene	0.965386	-0.109823	345
TRPS1	SE associated gene	0.965634	-0.109696	346
EZH2	epi genes	0.966354	-0.109327	347
AR	epi genes	0.96651	-0.109246	348
HRASLS2	SE associated gene	0.966904	-0.109044	349
CASKIN2	SE associated gene	0.971127	-0.106875	350
PLEKHF2	SE associated gene	0.971588	-0.106638	351
DUSP15	SE associated gene	0.973604	-0.105601	352
RMND5B	SE associated gene	0.974338	-0.105224	353
ANXA11	SE associated gene	0.978417	-0.103124	354
EPHB2	SE associated gene	0.978863	-0.102894	355
EPCAM	SE associated gene	0.979271	-0.102684	356
GPRC5C	SE associated gene	0.980381	-0.102112	357
RB1	Positive control	0.981118	-0.101732	358
WWC1	SE associated gene	0.98371	-0.100394	359
MAFB	SE associated gene	0.984414	-0.100031	360
MB	SE associated gene	0.985632	-0.0994019	361
MPV17L2	SE associated gene	0.985965	-0.09923	362
DOPEY2	SE associated gene	0.987143	-0.0986216	363
CHST12	SE associated gene	0.989549	-0.0973781	364
FBLN2	SE associated gene	0.990279	-0.0970002	365
BCOR	SE associated gene	0.993241	-0.0954671	366
DEGS1	SE associated gene	0.993908	-0.0951219	367
EZH1	epi genes	0.997376	-0.0933246	368
GAL3ST2	SE associated gene	1.00153	-0.0911711	369
NRAS	Positive control	1.00235	-0.0907421	370
FAM47E	SE associated gene	1.00546	-0.0891254	371
CCDC125	SE associated gene	1.00739	-0.0881222	372
RARRES3	SE associated gene	1.00808	-0.087763	373
UMODL1	SE associated gene	1.01328	-0.0850585	374
GGT6	SE associated gene	1.01383	-0.0847692	375
TMEM65	SE associated gene	1.014	-0.0846813	376
TGFB2	SE associated gene	1.0157	-0.0837923	377
N4BP3	SE associated gene	1.01695	-0.083145	378
CABLES1	SE associated gene	1.01842	-0.0823754	379
KDM4D	epi genes	1.01938	-0.0818736	380
MCF2L	SE associated gene	1.02104	-0.0810041	381
KDM3A	epi genes	1.02237	-0.0803134	382
VPS37C	SE associated gene	1.02322	-0.0798683	383
GRHL1	SE associated gene	1.0237	-0.0796176	384
ELF3	SE associated gene	1.02427	-0.0793193	385
COL6A3	SE associated gene	1.02437	-0.0792631	386
TBC1D16	SE associated gene	1.02467	-0.0791079	387
PTPRJ	SE associated gene	1.02642	-0.078193	388
LY6E	SE associated gene	1.02904	-0.0768179	389
SOX11	SE associated gene	1.02927	-0.0766995	390
MAPKAPK5	SE associated gene	1.03127	-0.0756532	391
SBK1	SE associated gene	1.03275	-0.0748742	392
TPPP	SE associated gene	1.03322	-0.0746308	393
PIM1	SE associated gene	1.03416	-0.0741364	394
KIAA0513	SE associated gene	1.03485	-0.0737739	395
NR4A1	SE associated gene	1.03515	-0.0736162	396
GOLPH3	SE associated gene	1.03653	-0.0728928	397
CNNM4	SE associated gene	1.03723	-0.0725224	398
ABTB2	SE associated gene	1.03841	-0.0719017	399
KDM6A	epi genes	1.0402	-0.070963	400
FAM174B	SE associated gene	1.04093	-0.07058	401
PRSS35	SE associated gene	1.04143	-0.0703167	402
KCNK5	SE associated gene	1.05071	-0.0654262	403
BRD3	epi genes	1.05116	-0.0651866	404
ZMYND15	SE associated gene	1.05319	-0.0641136	405
NINJ1	SE associated gene	1.05413	-0.063621	406
TRIM2	SE associated gene	1.05436	-0.0634993	407
SMAGP	SE associated gene	1.05455	-0.063397	408
WNT10A	SE associated gene	1.05457	-0.0633868	409
TPM1	SE associated gene	1.05531	-0.062995	410
GOLT1A	SE associated gene	1.06346	-0.0586806	411
PPP2R5A	SE associated gene	1.06447	-0.0581465	412
STXBP2	SE associated gene	1.06501	-0.0578607	413
RNF139	SE associated gene	1.06634	-0.0571572	414
PLAC8	SE associated gene	1.06871	-0.0558998	415
IL27	SE associated gene	1.07103	-0.0546678	416
VIM	epi genes	1.07218	-0.0540576	417
GOLGA5	SE associated gene	1.07233	-0.0539782	418
FBXO28	SE associated gene	1.07643	-0.0517972	419
SHROOM3	SE associated gene	1.07937	-0.0502291	420
PRODH	SE associated gene	1.08338	-0.0480945	421
RDH13	SE associated gene	1.08427	-0.0476152	422
DDAH1	SE associated gene	1.08863	-0.0452874	423
SIDT1	SE associated gene	1.09131	-0.0438583	424
CALD1	SE associated gene	1.09314	-0.0428774	425
PSPH	SE associated gene	1.09421	-0.0423058	426
ARRB1	SE associated gene	1.09424	-0.0422905	427
MTMR12	SE associated gene	1.09554	-0.0415928	428
RAB11FIP1	SE associated gene	1.096	-0.0413503	429
LRRC75B	SE associated gene	1.09607	-0.0413103	430
HDAC2	epi genes	1.09871	-0.0398972	431
BCL2L13	SE associated gene	1.10191	-0.0381782	432
ARHGAP32	SE associated gene	1.1025	-0.0378611	433
ADORA2A	SE associated gene	1.10298	-0.0376077	434
SYT17	SE associated gene	1.10396	-0.037077	435
ZBTB21	SE associated gene	1.10462	-0.0367249	436
KDM6B	epi genes	1.10751	-0.0351738	437
DNMT3L	SE associated gene	1.11146	-0.0330475	438
HEG1	SE associated gene	1.1123	-0.032595	439
PGAM5	SE associated gene	1.11369	-0.0318483	440
HOXD4	SE associated gene	1.11411	-0.031619	441
ZIC4	SE associated gene	1.11537	-0.0309395	442
KIF12	SE associated gene	1.12116	-0.0278212	443
APOBR	SE associated gene	1.12265	-0.0270143	444
SLC25A21	SE associated gene	1.12488	-0.0258084	445
C2CD4C	SE associated gene	1.12884	-0.0236692	446
PPAP2C	SE associated gene	1.13021	-0.0229249	447
CNNM3	SE associated gene	1.1379	-0.018759	448
GGT1	SE associated gene	1.13848	-0.01844	449
ADAMTS2	SE associated gene	1.1411	-0.0170221	450
TTC6	SE associated gene	1.14261	-0.0161985	451
USP34	SE associated gene	1.14563	-0.0145566	452
XBP1	SE associated gene	1.14686	-0.0138878	453
FAM132B	SE associated gene	1.14833	-0.0130886	454
CHD1	epi genes	1.15919	-0.00716127	455
RPS6KB1	SE associated gene	1.15984	-0.00680901	456
MAP3K8	SE associated gene	1.16556	-0.0036806	457
RSPH1	SE associated gene	1.16797	-0.00236029	458
TMC5	SE associated gene	1.17173	-0.000296257	459
NTC	NA	1.17227	0	460
LIMCH1	SE associated gene	1.17443	0.00118278	461
NUPR1	SE associated gene	1.17726	0.00273966	462
PPIL1	SE associated gene	1.19216	0.0109429	463
SYNPO	SE associated gene	1.19641	0.0132937	464
SIRT5	SE associated gene	1.2046	0.0178238	465
CALM1	SE associated gene	1.20594	0.0185694	466
KRAS	Positive control	1.20611	0.0186611	467
CLPTM1L	SE associated gene	1.21916	0.0259159	468
PBX1	SE associated gene	1.23562	0.0351022	469
GLYATL1	SE associated gene	1.24214	0.0387491	470
GSTM4	SE associated gene	1.25191	0.0442347	471
EDIL3	SE associated gene	1.25756	0.047415	472
SLC12A7	SE associated gene	1.25893	0.0481908	473
MAPK1	Positive control	1.27658	0.0581626	474
SOX13	SE associated gene	1.35951	0.105722	475
EP300	epi genes	2.04264	0.540385	476
CREBBP	epi genes	2.0435	0.540976	477
TP53	Positive control	2.45325	0.835604	478
CBS	SE associated gene	#N/A	#N/A
RP11-379F4.4	#N/A	#N/A	#N/A
WDR52	SE associated gene	#N/A	#N/A
