# Supplementary material for: Super-enhancer acquisition drives oncogene expression in triple negative breast cancer
Source: PLoS One. 2020 Jun 25;15(6):e0235343. doi: 10.1371/journal.pone.0235343 (PMC7316302; doi:10.1371/journal.pone.0235343)
Supplement: S8 Table — (XLSX) [file pone.0235343.s013.xlsx]

## Sheet: Sheet1
Table S8: CRISPR gene library
Gene	Guide Name	Target Sequence	Target Class
ABTB2	ABTB2_a	AGAGTCGAGCTGTACGTCC	SE associated gene
ABTB2	ABTB2_b	AGCTCGACTCTGAAGACGC	SE associated gene
ABTB2	ABTB2_c	TCGACTCTGAAGACGCTGG	SE associated gene
ABTB2	ABTB2_d	ACGCTGGAGGACTTGACCT	SE associated gene
ABTB2	ABTB2_e	GGACTTGACCTTGGACTCC	SE associated gene
ABTB2	ABTB2_f	GACCTTGGACTCCGGGTAT	SE associated gene
ABTB2	ABTB2_g	AGCGAGCGGCACGAGTCCC	SE associated gene
ABTB2	ABTB2_h	GGACGAGAGGCTGAGCGAG	SE associated gene
ADAM12	ADAM12_a	CCCTCCTGCTCGCCCTGGC	SE associated gene
ADAM12	ADAM12_b	ACCGGCCAGGGCGAGCAGG	SE associated gene
ADAM12	ADAM12_c	AGCACCGGCCAGGGCGAGC	SE associated gene
ADAM12	ADAM12_d	CGCGAGCAGAGCACCGGCC	SE associated gene
ADAM12	ADAM12_e	CAGGGCGCGAGCAGAGCAC	SE associated gene
ADAM12	ADAM12_f	GCTCTGCTCGCGCCCTGCG	SE associated gene
ADAM12	ADAM12_g	AACTTCATCAGCTCTTCCT	SE associated gene
ADAM12	ADAM12_h	AAGTTGTCAGTGCCTCTGT	SE associated gene
ADAMTS2	ADAMTS2_a	CGAGCCTGGCGTTCGCGGG	SE associated gene
ADAMTS2	ADAMTS2_b	CGGCGAGCCTGGCGTTCGC	SE associated gene
ADAMTS2	ADAMTS2_c	CACGGAGCGGAGCGCATCC	SE associated gene
ADAMTS2	ADAMTS2_d	GGAGCGGAGCGCATCCTGG	SE associated gene
ADAMTS2	ADAMTS2_e	AGTGCGCACGGGCACCGCC	SE associated gene
ADAMTS2	ADAMTS2_f	CCCGTGCGCACTGACGCCC	SE associated gene
ADAMTS2	ADAMTS2_g	CCTGGGCGTCAGTGCGCAC	SE associated gene
ADAMTS2	ADAMTS2_h	ACTGACGCCCAGGGCCGCT	SE associated gene
ADORA2A	ADORA2A_a	ACACCGAGGAGCCCATGAT	SE associated gene
ADORA2A	ADORA2A_b	GGCTCCTCGGTGTACATCA	SE associated gene
ADORA2A	ADORA2A_c	TCCTCGGTGTACATCACGG	SE associated gene
ADORA2A	ADORA2A_d	TCCACCGTGATGTACACCG	SE associated gene
ADORA2A	ADORA2A_e	GTGTACATCACGGTGGAGC	SE associated gene
ADORA2A	ADORA2A_f	GAGCTGGCCATTGCTGTGC	SE associated gene
ADORA2A	ADORA2A_g	ATTGCTGTGCTGGCCATCC	SE associated gene
ADORA2A	ADORA2A_h	AGGATGGCCAGCACAGCAA	SE associated gene
ADPRH	ADPRH_a	TGAAGCCGGGCAAGCCCAA	SE associated gene
ADPRH	ADPRH_b	GCCGGGCAAGCCCAATGGC	SE associated gene
ADPRH	ADPRH_c	TCCAGCCATTGGGCTTGCC	SE associated gene
ADPRH	ADPRH_d	AAGGGAATCCTCCAGCCAT	SE associated gene
ADPRH	ADPRH_e	TTCCCTTCAACAGCCATGA	SE associated gene
ADPRH	ADPRH_f	CCTTCAACAGCCATGAGGG	SE associated gene
ADPRH	ADPRH_g	CGCCCTCATGGCTGTTGAA	SE associated gene
ADPRH	ADPRH_h	CAGCCATGAGGGCGGCTGT	SE associated gene
AHCYL1	AHCYL1_a	GAACTGTAGCTGTCAGTGG	SE associated gene
AHCYL1	AHCYL1_b	TCATCAGAGCTATCTGTGT	SE associated gene
AHCYL1	AHCYL1_c	ACAGATAGCTCTGATGATG	SE associated gene
AHCYL1	AHCYL1_d	TTGGTTTGCTGCTTCTCTC	SE associated gene
AHCYL1	AHCYL1_e	AAGCAGCAAACCAACTCCA	SE associated gene
AHCYL1	AHCYL1_f	TTGCTGCTGCCCTTGGAGT	SE associated gene
AHCYL1	AHCYL1_g	TGTGTGAAGAACATCAAGC	SE associated gene
AHCYL1	AHCYL1_h	CAGGCAGAATTTGGACGCC	SE associated gene
AIF1L	AIF1L_a	GTCGGGCGAGCTCAGCAAC	SE associated gene
AIF1L	AIF1L_b	GTTCGGCTTGCTCAAAGCC	SE associated gene
AIF1L	AIF1L_c	GGCTTGCTCAAAGCCCGGC	SE associated gene
AIF1L	AIF1L_d	GCTCAAAGCCCGGCAGGAG	SE associated gene
AIF1L	AIF1L_e	CAAAGCCCGGCAGGAGAGG	SE associated gene
AIF1L	AIF1L_f	GCCCGGCAGGAGAGGAGGC	SE associated gene
AIF1L	AIF1L_g	GAGGCTGGCCGAGATCAAC	SE associated gene
AIF1L	AIF1L_h	CTCTTCATCACTGTACTTC	SE associated gene
AKAP10	AKAP10_a	GTCGGGACGGAGGGTGCGG	SE associated gene
AKAP10	AKAP10_b	CGCACCCTCCGTCCCGACC	SE associated gene
AKAP10	AKAP10_c	GGTCGGGACGGAGGGTGCG	SE associated gene
AKAP10	AKAP10_d	GCACCCTCCGTCCCGACCC	SE associated gene
AKAP10	AKAP10_e	CGGGTCGGGACGGAGGGTG	SE associated gene
AKAP10	AKAP10_f	CGCCATGTCCTTCTTCCGG	SE associated gene
AKAP10	AKAP10_g	CCGGAAGAAGGACATGGCG	SE associated gene
AKAP10	AKAP10_h	TTCCGCCGGAAGAAGGACA	SE associated gene
ALDH3B2	ALDH3B2_a	GCTGGACTCGGTCTTCATC	SE associated gene
ALDH3B2	ALDH3B2_b	GACTCGGTCTTCATCTGGA	SE associated gene
ALDH3B2	ALDH3B2_c	TGGAAGGAACCCTTTGGCC	SE associated gene
ALDH3B2	ALDH3B2_d	GGTCCTCATCATCGCACCC	SE associated gene
ALDH3B2	ALDH3B2_e	GTTCCAGGGTGCGATGATG	SE associated gene
ALDH3B2	ALDH3B2_f	GGTTCAGTGGGTAGTTCCA	SE associated gene
ALDH3B2	ALDH3B2_g	TACCCACTGAACCTGACCC	SE associated gene
ALDH3B2	ALDH3B2_h	CACCAGGGTCAGGTTCAGT	SE associated gene
ALDH4A1	ALDH4A1_a	AAGCCATCCCATGCGTGGT	SE associated gene
ALDH4A1	ALDH4A1_b	GATGAGGAGGTGTGGACGT	SE associated gene
ALDH4A1	ALDH4A1_c	TTTAACCATGGACATAAGG	SE associated gene
ALDH4A1	ALDH4A1_d	CCTTATGTCCATGGTTAAA	SE associated gene
ALDH4A1	ALDH4A1_e	CTTGGCCACCTTATGTCCA	SE associated gene
ALDH4A1	ALDH4A1_f	TTGTCTGCATAACAGAACT	SE associated gene
ALDH4A1	ALDH4A1_g	CTGCTCAACAAAGCCATTG	SE associated gene
ALDH4A1	ALDH4A1_h	CTCAATGGCTTTGTTGAGC	SE associated gene
ALX3	ALX3_a	GAAAGGCGCGCAGTGCTCG	SE associated gene
ALX3	ALX3_b	ACTGCGCGCCTTTCCGCGT	SE associated gene
ALX3	ALX3_c	ACGAGCCTCCGGGCCCGCA	SE associated gene
ALX3	ALX3_d	TGCAGGTGAGGCGCAGCGG	SE associated gene
ALX3	ALX3_e	CGGAAAGCGGGTCAGCCGC	SE associated gene
ALX3	ALX3_f	GACCCGCTTTCCGGCCTGC	SE associated gene
ALX3	ALX3_g	GGCCCGCAGGCCGGAAAGC	SE associated gene
ALX3	ALX3_h	CTGGGAGGTAGGGCTCCAG	SE associated gene
ANXA11	ANXA11_a	CGTTATCCAGCCCGATGGG	SE associated gene
ANXA11	ANXA11_b	CCCATCGGGCTGGATAACG	SE associated gene
ANXA11	ANXA11_c	CCACGTTATCCAGCCCGAT	SE associated gene
ANXA11	ANXA11_d	TAACGTGGCCACCTATGCG	SE associated gene
ANXA11	ANXA11_e	TTCAACCAGGACTATCTCT	SE associated gene
ANXA11	ANXA11_f	CCAAATGTCCCAGACATGT	SE associated gene
ANXA11	ANXA11_g	ATGCCCAACCTGTACCCTG	SE associated gene
ANXA11	ANXA11_h	GGCTGCCCAAAGCCGCCAG	SE associated gene
AP1B1	AP1B1_a	CATGCAGTTGACCACATCG	SE associated gene
AP1B1	AP1B1_b	GTGGTCAACTGCATGCAGA	SE associated gene
AP1B1	AP1B1_c	TGCATGCAGACGGACAACC	SE associated gene
AP1B1	AP1B1_d	GGCGTAATTCATCAAGTAG	SE associated gene
AP1B1	AP1B1_e	GCCAAGAGTCAGCCTGACA	SE associated gene
AP1B1	AP1B1_f	CGGCCATAATGGCCATGTC	SE associated gene
AP1B1	AP1B1_g	AAGGTGTTGACGGCCATAA	SE associated gene
AP1B1	AP1B1_h	ACTGCCAGGGCTCGGATGA	SE associated gene
APOBR	APOBR_a	TCCTCCGGCTATACCTCCC	SE associated gene
APOBR	APOBR_b	CCCAGGGAGGTATAGCCGG	SE associated gene
APOBR	APOBR_c	CAGCCCAGGGAGGTATAGC	SE associated gene
APOBR	APOBR_d	TACCTCCCTGGGCTGCACC	SE associated gene
APOBR	APOBR_e	CAAGGCCTGGTGCAGCCCA	SE associated gene
APOBR	APOBR_f	GGCTGCACCAGGCCTTGAG	SE associated gene
APOBR	APOBR_g	GTAGGAGACAAAGGTGCCG	SE associated gene
APOBR	APOBR_h	CCTTTGTCTCCTACCTCCT	SE associated gene
AR	AR_a	GGTGGAAAGTAATAGTCAA	epi genes
AR	AR_b	ACAGATCAGGCAGGTCTTC	epi genes
AR	AR_c	TCATCTCCACAGATCAGGC	epi genes
AR	AR_d	AGCTTCATCTCCACAGATC	epi genes
AR	AR_e	CTGTGGAGATGAAGCTTCT	epi genes
AR	AR_f	AAGCTTCTGGGTGTCACTA	epi genes
AR	AR_g	ACTATGGAGCTCTCACATG	epi genes
AR	AR_h	CTCACATGTGGAAGCTGCA	epi genes
ARHGAP31	ARHGAP31_a	AGCAGAAGCTGAAACGAAA	SE associated gene
ARHGAP31	ARHGAP31_b	TCACAGCCAAACGCGCTGG	SE associated gene
ARHGAP31	ARHGAP31_c	AGGTCACAGCCAAACGCGC	SE associated gene
ARHGAP31	ARHGAP31_d	GCGTTTGGCTGTGACCTGA	SE associated gene
ARHGAP31	ARHGAP31_e	TGTGACCTGACGGAGTATC	SE associated gene
ARHGAP31	ARHGAP31_f	GCTTTCCAGATACTCCGTC	SE associated gene
ARHGAP31	ARHGAP31_g	ACGGAGTATCTGGAAAGCT	SE associated gene
ARHGAP31	ARHGAP31_h	TATCTGGAAAGCTCGGGAC	SE associated gene
ARHGAP32	ARHGAP32_a	AACAGAAGCTGAAGCAGCG	SE associated gene
ARHGAP32	ARHGAP32_b	AGGGTGTTTGGTTGTGACC	SE associated gene
ARHGAP32	ARHGAP32_c	GTGTTTGGTTGTGACCTGG	SE associated gene
ARHGAP32	ARHGAP32_d	TGCAGCTTTGAAGAACCTG	SE associated gene
ARHGAP32	ARHGAP32_e	ATTGAGAGATATGGCATCG	SE associated gene
ARHGAP32	ARHGAP32_f	AGAGATATGGCATCGTGGA	SE associated gene
ARHGAP32	ARHGAP32_g	ATTGGAGGCAACACCAGAA	SE associated gene
ARHGAP32	ARHGAP32_h	GTGCTCAGAGTCAAATTCA	SE associated gene
ARHGAP8	ARHGAP8_a	CGTGCTCAGCGCAGGATCC	SE associated gene
ARHGAP8	ARHGAP8_b	GGTGACTCGTGCTCAGCGC	SE associated gene
ARHGAP8	ARHGAP8_c	AGTCACCCGTTCTACGACG	SE associated gene
ARHGAP8	ARHGAP8_d	GTCTGGCCACGTCGTAGAA	SE associated gene
ARHGAP8	ARHGAP8_e	TCTACGACGTGGCCAGACA	SE associated gene
ARHGAP8	ARHGAP8_f	GCCAGACATGGCATTCTGC	SE associated gene
ARHGAP8	ARHGAP8_g	AGACATGGCATTCTGCAGG	SE associated gene
ARHGAP8	ARHGAP8_h	ACCTGCAGAATGCCATGTC	SE associated gene
ARID5B	ARID5B_a	AATCTCTTCTTTGTGGGCA	SE associated gene
ARID5B	ARID5B_b	AAAGAAGAGATTCATTCAG	SE associated gene
ARID5B	ARID5B_c	GATTCATTCAGTGGTGTTA	SE associated gene
ARID5B	ARID5B_d	ATTCCAACAACAATTCCGA	SE associated gene
ARID5B	ARID5B_e	TTGCCATCGGAATTGTTGT	SE associated gene
ARID5B	ARID5B_f	TTGGCAACGGCTTTGCCAT	SE associated gene
ARID5B	ARID5B_g	GGCTTGGTCAAGGCTGACC	SE associated gene
ARID5B	ARID5B_h	TTATTCTTCGGCTTGGTCA	SE associated gene
ARRB1	ARRB1_a	TCAAGAAGGCCAGTCCAAA	SE associated gene
ARRB1	ARRB1_b	CACCGTCTACCTGGGAAAG	SE associated gene
ARRB1	ARRB1_c	TCCCGCTTTCCCAGGTAGA	SE associated gene
ARRB1	ARRB1_d	CACAAAGTCCCGCTTTCCC	SE associated gene
ARRB1	ARRB1_e	GTGGACCACATCGACCTCG	SE associated gene
ARRB1	ARRB1_f	AGGGTCCACGAGGTCGATG	SE associated gene
ARRB1	ARRB1_g	ATCGACCTCGTGGACCCTG	SE associated gene
ARRB1	ARRB1_h	GAGATACTCAGGATCCACC	SE associated gene
ASCL2	ASCL2_a	GGACGGCGGCACACTGCCC	SE associated gene
ASCL2	ASCL2_b	CAGCGCAGCCGACAGGGAC	SE associated gene
ASCL2	ASCL2_c	CCCTGTCGGCTGCGCTGCC	SE associated gene
ASCL2	ASCL2_d	CCGGGCAGCGCAGCCGACA	SE associated gene
ASCL2	ASCL2_e	TGTCGGCTGCGCTGCCCGG	SE associated gene
ASCL2	ASCL2_f	CTGCAGCGCAACAGTTCCG	SE associated gene
ASCL2	ASCL2_g	GGAACTGTTGCGCTGCAGC	SE associated gene
ASCL2	ASCL2_h	GGCTGCAGCGCAACAGTTC	SE associated gene
ASS1	ASS1_a	AGCCACACGAGGATGCACG	SE associated gene
ASS1	ASS1_b	ATGTGTCCCACGGCGCCAC	SE associated gene
ASS1	ASS1_c	GAGCTCAGCTGCTACTCAC	SE associated gene
ASS1	ASS1_d	GTACTCCATCAGGTCATTG	SE associated gene
ASS1	ASS1_e	TTGCGCACTTCCCGGTCCA	SE associated gene
ASS1	ASS1_f	ATGAGCCAACTGATGCCAC	SE associated gene
ASS1	ASS1_g	TGAACCCGGTGGCATCAGT	SE associated gene
ATF3	ATF3_a	GTGACTGATTCCAGCGCAG	SE associated gene
ATF3	ATF3_b	TTTCCTTTCATCTTCTTCA	SE associated gene
ATF3	ATF3_c	AAGTGCCGAAACAAGAAGA	SE associated gene
ATF3	ATF3_d	ATGCTTCAACACCCAGGCC	SE associated gene
ATF3	ATF3_e	CGAGGCAGAGACCTGGCCT	SE associated gene
ATF3	ATF3_f	CAGAGGTGCTTGTTCTGGA	SE associated gene
ATF3	ATF3_g	GTGGCAGAGGTGCTTGTTC	SE associated gene
ATF3	ATF3_h	GAACAAGCACCTCTGCCAC	SE associated gene
ATOH8	ATOH8_a	AAGCACATCCCGGTCCTCG	SE associated gene
ATOH8	ATOH8_b	ACATCCCGGTCCTCGAGGA	SE associated gene
ATOH8	ATOH8_c	GGTCCTCGAGGACGGGCCG	SE associated gene
ATOH8	ATOH8_d	ACGGCCCGTCCTCGAGGAC	SE associated gene
ATOH8	ATOH8_e	CTTCCACGGCCCGTCCTCG	SE associated gene
ATOH8	ATOH8_f	TGGAAGACCGTGTGCGTGA	SE associated gene
ATOH8	ATOH8_g	TCACGCACACGGTCTTCCA	SE associated gene
ATOH8	ATOH8_h	TTCAGCTCCTTCACGCACA	SE associated gene
ATP9A	ATP9A_a	GACAACATCCCGCTGCAGC	SE associated gene
ATP9A	ATP9A_b	TCTGGCGCACCGGCTGCAG	SE associated gene
ATP9A	ATP9A_c	GCCGGTGCGCCAGAAGAAG	SE associated gene
ATP9A	ATP9A_d	GTGCGCCAGAAGAAGCGGA	SE associated gene
ATP9A	ATP9A_e	TCCGCTTCTTCTGGCGCAC	SE associated gene
ATP9A	ATP9A_f	GCTGTCCATCCGCTTCTTC	SE associated gene
ATP9A	ATP9A_g	GAAGAAGCGGATGGACAGC	SE associated gene
ATP9A	ATP9A_h	GCGAGTGGCTGAGATGCTG	SE associated gene
AZGP1	AZGP1_a	CTCTGACCTATATCTACAC	SE associated gene
AZGP1	AZGP1_b	GACAGCCCAGTGTAGATAT	SE associated gene
AZGP1	AZGP1_c	GCCAAGGGCCTGAAACGCG	SE associated gene
AZGP1	AZGP1_d	GAGGTCATTGAGTGAGCCA	SE associated gene
AZGP1	AZGP1_e	GTTGTATCTAAAGAACTGG	SE associated gene
AZGP1	AZGP1_f	ACTGTTGTATCTAAAGAAC	SE associated gene
AZGP1	AZGP1_g	TAGATACAACAGTAAAGAC	SE associated gene
AZGP1	AZGP1_h	ACAGGAAGTCTCAGCCCAT	SE associated gene
BACE2	BACE2_a	CAGAGGCAGCAGCAGCGCC	SE associated gene
BACE2	BACE2_b	GCTGCCTCTGCTGGCCCAG	SE associated gene
BACE2	BACE2_c	GGCAGCGTGAAGGGCGCGG	SE associated gene
BACE2	BACE2_d	GTTCGTGGCCGCGGCCACC	SE associated gene
BACE2	BACE2_e	ACTACGCGGTTCGTGGCCG	SE associated gene
BACE2	BACE2_f	GGCGCAACTACGCGGTTCG	SE associated gene
BACE2	BACE2_g	CGCGTAGTTGCGCCCACCC	SE associated gene
BACE2	BACE2_h	CTGCCGAGCGCCACGCCGA	SE associated gene
BAHD1	BAHD1_a	CCCTTCCCATGCTGAGTTC	SE associated gene
BAHD1	BAHD1_b	CCCGAACTCAGCATGGGAA	SE associated gene
BAHD1	BAHD1_c	TGAGGCCCGAACTCAGCAT	SE associated gene
BAHD1	BAHD1_d	TGCTGAGTTCGGGCCTCAC	SE associated gene
BAHD1	BAHD1_e	GTGAGGCCCGAACTCAGCA	SE associated gene
BAHD1	BAHD1_f	TGCTGTCTTCCATCTGCAG	SE associated gene
BAHD1	BAHD1_g	CAGATGGAAGACAGCAACA	SE associated gene
BAHD1	BAHD1_h	GAAGACAGCAACATGGAGC	SE associated gene
BAMBI	BAMBI_a	CTCCAGCTACATCTTCATC	SE associated gene
BAMBI	BAMBI_b	GATGAAGATGTAGCTGGAG	SE associated gene
BAMBI	BAMBI_c	AGCCAGATGAAGATGTAGC	SE associated gene
BAMBI	BAMBI_d	ATCTTCATCTGGCTGCAGC	SE associated gene
BAMBI	BAMBI_e	CAGCTGGAGCTCTGCGCCA	SE associated gene
BAMBI	BAMBI_f	TTGGTGAGCAGCACGGCCA	SE associated gene
BAMBI	BAMBI_g	CTGCCCACTGTGTAGCCAC	SE associated gene
BAMBI	BAMBI_h	TAACCAGTGGCTACACAGT	SE associated gene
BATF	BATF_a	CACTGCTGTCGGAGCTGTG	SE associated gene
BATF	BATF_b	AAGCTGGAGTCACTGCTGT	SE associated gene
BATF	BATF_c	GGAGGAGAGCGGCTGAAGC	SE associated gene
BATF	BATF_d	TGATGTGAGAAGAGTTCAG	SE associated gene
BATF	BATF_e	TGTGAGAAGAGTTCAGAGG	SE associated gene
BATF	BATF_f	CGCCCAGAAGAGCCGACAG	SE associated gene
BATF	BATF_g	CTCTGTCGGCTCTTCTGGG	SE associated gene
BATF	BATF_h	CTGCCTCTGTCGGCTCTTC	SE associated gene
BCDIN3D	BCDIN3D_a	CGGTGCCCACGGAACTGGA	SE associated gene
BCDIN3D	BCDIN3D_b	GCCCACGGAACTGGATGGA	SE associated gene
BCDIN3D	BCDIN3D_c	TCCCTCCATCCAGTTCCGT	SE associated gene
BCDIN3D	BCDIN3D_d	CTGGATGGAGGGAGTGTTA	SE associated gene
BCDIN3D	BCDIN3D_e	AGTGTTAAGGAGACCGCAG	SE associated gene
BCDIN3D	BCDIN3D_f	AAGGAGACCGCAGCGGAAG	SE associated gene
BCDIN3D	BCDIN3D_g	CGCGATTCCTCTTCCGCTG	SE associated gene
BCDIN3D	BCDIN3D_h	GAAGAGGAATCGCGAGTTC	SE associated gene
BCL2L13	BCL2L13_a	ACTGCAGCAGTGCGCTCAA	SE associated gene
BCL2L13	BCL2L13_b	CAGTTTGGCGTGACATACC	SE associated gene
BCL2L13	BCL2L13_c	TTTGGCGTGACATACCTGG	SE associated gene
BCL2L13	BCL2L13_d	CTCTGCCGAATAGTCCTCC	SE associated gene
BCL2L13	BCL2L13_e	CAGAGTACATCATTCAGCA	SE associated gene
BCL2L13	BCL2L13_f	AGTACATCATTCAGCAAGG	SE associated gene
BCL2L13	BCL2L13_g	CATCATTCAGCAAGGTGGC	SE associated gene
BCL2L13	BCL2L13_h	GTGTTTAGTCTTGAGTCAG	SE associated gene
BCOR	BCOR_a	GTGAACGTTCCCATACAGG	SE associated gene
BCOR	BCOR_b	GTATGGGAACGTTCACAGC	SE associated gene
BCOR	BCOR_c	GCTGTGAACGTTCCCATAC	SE associated gene
BCOR	BCOR_d	AGCTGGATGAACAGCGAGA	SE associated gene
BCOR	BCOR_e	CGAGAGGGTCCGCATGTGT	SE associated gene
BCOR	BCOR_f	AAAGCCAGACTGGAACTGA	SE associated gene
BCOR	BCOR_g	TCTTCCCTCAGTTCCAGTC	SE associated gene
BCOR	BCOR_h	GGATGCGAGCACGGCCCAT	SE associated gene
BID	BID_a	TGGACCGTAGCATCCCTCC	SE associated gene
BID	BID_b	CGTAGCATCCCTCCGGGCC	SE associated gene
BID	BID_c	CAGGCCCGGAGGGATGCTA	SE associated gene
BID	BID_d	TCCCTCCGGGCCTGGTGAA	SE associated gene
BID	BID_e	GCCGTTCACCAGGCCCGGA	SE associated gene
BID	BID_f	CCGGGCCTGGTGAACGGCC	SE associated gene
BID	BID_g	GGCCGTTCACCAGGCCCGG	SE associated gene
BID	BID_h	CCAGGCCGTTCACCAGGCC	SE associated gene
BMF	BMF_a	GAGCCATCTCAGTGTGTGG	SE associated gene
BMF	BMF_b	GCTCCTCCACACACTGAGA	SE associated gene
BMF	BMF_c	TCTCAGTGTGTGGAGGAGC	SE associated gene
BMF	BMF_d	CAGTGTGTGGAGGAGCTGG	SE associated gene
BMF	BMF_e	GATGATGTGTTCCAACCAG	SE associated gene
BMF	BMF_f	ATGTGTTCCAACCAGAGGA	SE associated gene
BMF	BMF_g	GGAGCCGGTGACCCAACCC	SE associated gene
BMF	BMF_h	AGCTCCCGGGTTGGGTCAC	SE associated gene
BMP4	BMP4_a	CCTGGTAACCGAATGCTGA	SE associated gene
BMP4	BMP4_b	CCATCAGCATTCGGTTACC	SE associated gene
BMP4	BMP4_c	TATTATGCCAAGTCCTGCT	SE associated gene
BMP4	BMP4_d	TATGCCAAGTCCTGCTAGG	SE associated gene
BMP4	BMP4_e	CGCGCCTCCTAGCAGGACT	SE associated gene
BMP4	BMP4_f	ATGGCTCGCGCCTCCTAGC	SE associated gene
BMP4	BMP4_g	CTCAGGTATCAAACTAGCA	SE associated gene
BMP4	BMP4_h	TAGTTTGATACCTGAGACG	SE associated gene
BOC	BOC_a	GCGTGGGACGATGACGGCG	SE associated gene
BOC	BOC_b	GGACGATGACGGCGTGGAG	SE associated gene
BOC	BOC_c	GACGGCGTGGAGAGGAATG	SE associated gene
BOC	BOC_d	TGGAGAGGAATGAGGCCTG	SE associated gene
BOC	BOC_e	ATGAGGCCTGAGGTCACAC	SE associated gene
BOC	BOC_f	GGCAAGCCAGTGTGACCTC	SE associated gene
BOC	BOC_g	GCCTCCTCCTAGCCACAGC	SE associated gene
BOC	BOC_h	GCCTGCTGTGGCTAGGAGG	SE associated gene
BPGM	BPGM_a	AACATAATAAGTTTGTACT	SE associated gene
BPGM	BPGM_b	AACTTATTATGTTAAGACA	SE associated gene
BPGM	BPGM_c	ATTATGTTAAGACATGGAG	SE associated gene
BPGM	BPGM_d	GGAGAGGGTGCTTGGAATA	SE associated gene
BPGM	BPGM_e	ATCAGAAACTCAACAGCGA	SE associated gene
BPGM	BPGM_f	AAACTCAACAGCGAAGGAA	SE associated gene
BPGM	BPGM_g	CTCAACAGCGAAGGAATGG	SE associated gene
BPGM	BPGM_h	CGAAGGAATGGAGGAAGCT	SE associated gene
BRD2	BRD2_a	GGACATGGGTACTATTAAG	epi genes
BRD2	BRD2_b	ATGTAACAGTTGGTGAACA	epi genes
BRD2	BRD2_c	TTGTTGTAAATGTAACAGT	epi genes
BRD2	BRD2_d	TTAGGACAATATCATCAGT	epi genes
BRD2	BRD2_e	GTCCTAATGGCACAAACGC	epi genes
BRD2	BRD2_f	CCACAAGAAGAACAAGAGC	epi genes
BRD2	BRD2_g	CCAGCTCTTGTTCTTCTTG	epi genes
BRD2	BRD2_h	TTGTGGCTGTTCTTAGGGA	epi genes
BRD3	BRD3_a	GGTGGGTTCACAGGGCCCG	epi genes
BRD3	BRD3_b	TCTTGCGGCCGGGCTTGCT	epi genes
BRD3	BRD3_c	GCTGGTTGGTCTTGCGGCC	epi genes
BRD3	BRD3_d	CTGCAGCTGGTTGGTCTTG	epi genes
BRD3	BRD3_e	TGCATGTACTGCAGCTGGT	epi genes
BRD3	BRD3_f	ATTCTGCATGTACTGCAGC	epi genes
BRD3	BRD3_g	CTGCAGTACATGCAGAATG	epi genes
BRD3	BRD3_h	CAGTACATGCAGAATGTGG	epi genes
BRD4	BRD4_a	TGTCTGCGGAGAGCGGCCC	epi genes
BRD4	BRD4_b	ATTTCTCAATCTCGTCCCA	epi genes
BRD4	BRD4_c	TTGAGAAATCTGCCAGTAA	epi genes
BRD4	BRD4_d	TCCCAAATGTCTACAACAC	epi genes
BRD4	BRD4_e	ATGTCTACAACACAGGCCC	epi genes
BRD4	BRD4_f	TGGCTGCGTTGGCTGGCTG	epi genes
BRD4	BRD4_g	GCTGGCTGCGTTGGCTGGC	epi genes
BRD4	BRD4_h	TGGTGCTGGCTGCGTTGGC	epi genes
BTG2	BTG2_a	CATGTCGGTTCCCTTCCCG	SE associated gene
BTG2	BTG2_b	AAGGGAACCGACATGCTCC	SE associated gene
BTG2	BTG2_c	GCGATCTCCGGGAGCATGT	SE associated gene
BTG2	BTG2_d	CGGAGATCGCCGCCGCCGT	SE associated gene
BTG2	BTG2_e	CCACGGCGGCGGCGATCTC	SE associated gene
BTG2	BTG2_f	GAGAGGAAGCCCACGGCGG	SE associated gene
BTG2	BTG2_g	CTGGAGAGGAAGCCCACGG	SE associated gene
BTG2	BTG2_h	GGTCCTCAGGAGGCTGGAG	SE associated gene
TEX36	TEX36_a	TTCAACCCACCTTCAGACA	SE associated gene
TEX36	TEX36_b	CCCACCTTCAGACAAGGAT	SE associated gene
TEX36	TEX36_c	TCCCATCCTTGTCTGAAGG	SE associated gene
TEX36	TEX36_d	TTCAGACAAGGATGGGAGA	SE associated gene
TEX36	TEX36_e	ATCTCCCATCCTTGTCTGA	SE associated gene
TEX36	TEX36_f	TTTGCGTTAGCCCGATGTG	SE associated gene
TEX36	TEX36_g	TAGCACTGGTGATGGATTC	SE associated gene
TEX36	TEX36_h	TTTGACGTAGCACTGGTGA	SE associated gene
ATG101	ATG101_a	AACTGTCGCTCGGAGGTGC	SE associated gene
ATG101	ATG101_b	TGTCGCTCGGAGGTGCTGG	SE associated gene
ATG101	ATG101_c	TCGGAGGTGCTGGAGGTGT	SE associated gene
ATG101	ATG101_d	GAGGTGCTGGAGGTGTCGG	SE associated gene
ATG101	ATG101_e	TGCTGGAGGTGTCGGTGGA	SE associated gene
ATG101	ATG101_f	CAGGTGGAGGAGGCCATGC	SE associated gene
ATG101	ATG101_g	ATGCTGGCTGTGCTGCACA	SE associated gene
ATG101	ATG101_h	GTGTGCAGCACAGCCAGCA	SE associated gene
NATD1	NATD1_a	TCCAGCGCGCCCAGCGGCA	SE associated gene
NATD1	NATD1_b	CCTGCTCCAGCGCGCCCAG	SE associated gene
NATD1	NATD1_c	GGTCGTGCTCCACGCGGAT	SE associated gene
NATD1	NATD1_d	CCGCGTGGAGCACGACCGC	SE associated gene
NATD1	NATD1_e	CCGGCGGTCGTGCTCCACG	SE associated gene
NATD1	NATD1_f	AGTGAACTGGCGGCGCCGG	SE associated gene
NATD1	NATD1_g	GACAGTGAACTGGCGGCGC	SE associated gene
NATD1	NATD1_h	GCGCCGCCAGTTCACTGTC	SE associated gene
GUCD1	GUCD1_a	GCTGCTGGATGACGGGCAC	SE associated gene
GUCD1	GUCD1_b	GGTAGAGCTGCTGGATGAC	SE associated gene
GUCD1	GUCD1_c	CATCCAGCAGCTCTACCAC	SE associated gene
GUCD1	GUCD1_d	AGCTCTACCACTGGGACTG	SE associated gene
GUCD1	GUCD1_e	TACCACTGGGACTGTGGCC	SE associated gene
GUCD1	GUCD1_f	GGCCAGGCCACAGTCCCAG	SE associated gene
GUCD1	GUCD1_g	GGCCTGGCCTGCTCCAGGA	SE associated gene
GUCD1	GUCD1_h	CACCATCCTGGAGCAGGCC	SE associated gene
C2CD4C	C2CD4C_a	CAACATGTGGTTCTTGGAG	SE associated gene
C2CD4C	C2CD4C_b	CGCTCCAAGAACCACATGT	SE associated gene
C2CD4C	C2CD4C_c	GTTCTTGGAGCGGCTTCGG	SE associated gene
C2CD4C	C2CD4C_d	CGTCAACACATTGCTGTAC	SE associated gene
C2CD4C	C2CD4C_e	GGCCCGAGGGCAGCTTGGG	SE associated gene
C2CD4C	C2CD4C_f	GCCTGTCCCTCGCCCTCCG	SE associated gene
C2CD4C	C2CD4C_g	GCGAGGGACAGGCCGCGCT	SE associated gene
C2CD4C	C2CD4C_h	GTTCTGTTCCGACGTGGAG	SE associated gene
C2CD4D	C2CD4D_a	AAAGCTGGCTATAAGGTGG	SE associated gene
C2CD4D	C2CD4D_b	CAACGGGCCGCAGGCTCCG	SE associated gene
C2CD4D	C2CD4D_c	AAGGCGCCCAACGGGCCGC	SE associated gene
C2CD4D	C2CD4D_d	CGGCCCGTTGGGCGCCTTC	SE associated gene
C2CD4D	C2CD4D_e	AGGCCGGAAGGCGCCCAAC	SE associated gene
C2CD4D	C2CD4D_f	GCTTGGAGAACAGGCCGGA	SE associated gene
C2CD4D	C2CD4D_g	CGACGCTTGGAGAACAGGC	SE associated gene
C2CD4D	C2CD4D_h	GGCGCGACGCTTGGAGAAC	SE associated gene
HMCES	HMCES_a	ACATCTCTAGGTAAGTGAC	SE associated gene
HMCES	HMCES_b	CTCTCGTGAGAACATCTCT	SE associated gene
HMCES	HMCES_c	ACGAGAGCTTGCGCCTACC	SE associated gene
HMCES	HMCES_d	AGCTTGCGCCTACCAGGAT	SE associated gene
HMCES	HMCES_e	TGCGCCTACCAGGATCGGC	SE associated gene
HMCES	HMCES_f	CCAGCAGCGGCTCCCGGAG	SE associated gene
HMCES	HMCES_g	GCAGCGGCTCCCGGAGTGG	SE associated gene
HMCES	HMCES_h	CCACTCCGGGAGCCGCTGC	SE associated gene
SMIM3	SMIM3_a	TTGGGAAGCACGACTTCCA	SE associated gene
SMIM3	SMIM3_b	GTGCTTCCCAAGCACATCC	SE associated gene
SMIM3	SMIM3_c	CAAGCACATCCTGGATATC	SE associated gene
SMIM3	SMIM3_d	CAGATATCCAGGATGTGCT	SE associated gene
SMIM3	SMIM3_e	GACAATAACCCAGATATCC	SE associated gene
SMIM3	SMIM3_f	GTTATTGTCCTCATCATCC	SE associated gene
SMIM3	SMIM3_g	AATGGTGGCCAGGATGATG	SE associated gene
SMIM3	SMIM3_h	CATGATGACAATGGTGGCC	SE associated gene
CA4	CA4_a	CGGATGCTGCTGGCGCTCC	SE associated gene
CA4	CA4_b	GCGCTCCTGGCCCTCTCCG	SE associated gene
CA4	CA4_c	CTCTCCGCGGCGCGGCCAT	SE associated gene
CA4	CA4_d	GATGGCCGCGCCGCGGAGA	SE associated gene
CA4	CA4_e	ATCAACATCGTCACCACCA	SE associated gene
CA4	CA4_f	TTGGTGGTGACGATGTTGA	SE associated gene
CA4	CA4_g	ATCGTCACCACCAAGGCAA	SE associated gene
CA4	CA4_h	GTCACCACCAAGGCAAAGG	SE associated gene
CABLES1	CABLES1_a	GGCAACACGATACCAGGAA	SE associated gene
CABLES1	CABLES1_b	GGATCTTCTGCCACTGATA	SE associated gene
CABLES1	CABLES1_c	CTTGGGTACTGTCGCGATA	SE associated gene
CABLES1	CABLES1_d	ATCGCGACAGTACCCAAGT	SE associated gene
CABLES1	CABLES1_e	ACGGAGGAAGACAATCAAC	SE associated gene
CABLES1	CABLES1_f	TGAGTTTGAAAGAGATCAT	SE associated gene
CABLES1	CABLES1_g	TTGAAAGAGATCATTGGTC	SE associated gene
CABLES1	CABLES1_h	AAGAGATCATTGGTCTGGA	SE associated gene
CALD1	CALD1_a	TCATCGTCATTCCTCTGGT	SE associated gene
CALD1	CALD1_b	TTCATCATCGTCATTCCTC	SE associated gene
CALD1	CALD1_c	AGGAATGACGATGATGAAG	SE associated gene
CALD1	CALD1_d	TGATGAAGAGGAGGCAGCC	SE associated gene
CALD1	CALD1_e	CCGCCGAGCCCGACAGGAA	SE associated gene
CALD1	CALD1_f	CCGTTCCTGTCGGGCTCGG	SE associated gene
CALD1	CALD1_g	AGCCCGACAGGAACGGCTG	SE associated gene
CALD1	CALD1_h	CAGCCGTTCCTGTCGGGCT	SE associated gene
CALM1	CALM1_a	TCTTTATCAAATAGGGAGA	SE associated gene
CALM1	CALM1_b	TCTCCCTATTTGATAAAGA	SE associated gene
CALM1	CALM1_c	TCGCCATCTTTATCAAATA	SE associated gene
CALM1	CALM1_d	TATTTGATAAAGATGGCGA	SE associated gene
CALM1	CALM1_e	ATCGCCATCTTTATCAAAT	SE associated gene
CALM1	CALM1_f	GGAACTTGGAACTGTCATG	SE associated gene
CALM1	CALM1_g	CCAACAGAAGCTGAATTGC	SE associated gene
CALM1	CALM1_h	CCTGCAATTCAGCTTCTGT	SE associated gene
CAMSAP3	CAMSAP3_a	AAGGTCCTCCGCAGCGGCC	SE associated gene
CAMSAP3	CAMSAP3_b	CTAGAAAGGTCCTCCGCAG	SE associated gene
CAMSAP3	CAMSAP3_c	TTGATCTCGGGCACTAGAA	SE associated gene
CAMSAP3	CAMSAP3_d	GTGCCCGAGATCAAGTCGC	SE associated gene
CAMSAP3	CAMSAP3_e	GGTCCAGCGACTTGATCTC	SE associated gene
CAMSAP3	CAMSAP3_f	GGACCAGTACGATTTCTCG	SE associated gene
CAMSAP3	CAMSAP3_g	GGCCCGCGAGAAATCGTAC	SE associated gene
CAMSAP3	CAMSAP3_h	TACGATTTCTCGCGGGCCA	SE associated gene
CAPN9	CAPN9_a	CCAGGGCCTCAGGCACACC	SE associated gene
CAPN9	CAPN9_b	CCGGGTGTGCCTGAGGCCC	SE associated gene
CAPN9	CAPN9_c	TGGGAACCGGGTGTGCCTG	SE associated gene
CAPN9	CAPN9_d	CAGGCACACCCGGTTCCCA	SE associated gene
CAPN9	CAPN9_e	CCCGGTTCCCAAGGACGCC	SE associated gene
CAPN9	CAPN9_f	TCCGGGCGTCCTTGGGAAC	SE associated gene
CAPN9	CAPN9_g	TGGGTGATCCGGGCGTCCT	SE associated gene
CAPN9	CAPN9_h	CCCGGATCACCCACTCCTC	SE associated gene
CARKD	CARKD_a	CCCAATGCTGTTCATGAGG	SE associated gene
CARKD	CARKD_b	CACCTCATGAACAGCATTG	SE associated gene
CARKD	CARKD_c	TCCACCTCATGAACAGCAT	SE associated gene
CARKD	CARKD_d	TGTTCATGAGGTGGAGAAG	SE associated gene
CARKD	CARKD_e	GGTGGAGAAGTGGCTGCCC	SE associated gene
CARKD	CARKD_f	CGACAAGAGCATGCAGCCG	SE associated gene
CARKD	CARKD_g	GGCTGCATGCTCTTGTCGT	SE associated gene
CARKD	CARKD_h	TACGACAAGAGCATGCAGC	SE associated gene
CASKIN2	CASKIN2_a	CCCGCTGCACTACGCAGCC	SE associated gene
CASKIN2	CASKIN2_b	CCAGGCTGCGTAGTGCAGC	SE associated gene
CASKIN2	CASKIN2_c	CTGCACTACGCAGCCTGGC	SE associated gene
CASKIN2	CASKIN2_d	CTACGCAGCCTGGCAGGGC	SE associated gene
CASKIN2	CASKIN2_e	CGCGCAGCAGCAGCCTCAC	SE associated gene
CASKIN2	CASKIN2_f	CTGCTGCTGCGCGCCTCTG	SE associated gene
CASKIN2	CASKIN2_g	GCGGCATTGACAGCCGCAG	SE associated gene
CASKIN2	CASKIN2_h	GCTGTCAATGCCGCCTCGC	SE associated gene
CBR1	CBR1_a	GCTTGAATATGAAAGGGTG	SE associated gene
CBR1	CBR1_b	ACTTCAGCTTGAATATGAA	SE associated gene
CBR1	CBR1_c	TAATTCTGTGCACACATCT	SE associated gene
CBR1	CBR1_d	ATCCTGCGTACTGTCTGCA	SE associated gene
CBR1	CBR1_e	GACCATGCAGACAGTACGC	SE associated gene
CBR1	CBR1_f	GCTTGGACTTTCCTCCTGA	SE associated gene
CBR1	CBR1_g	AAAGTCCAAGCCCTTAGCA	SE associated gene
CBR1	CBR1_h	GGAACTTCTGCTGCAGCTC	SE associated gene
CBS	CBS_a	TGGTGTCGTAGTGAGCCAG	SE associated gene
CBS	CBS_b	GGTGGTGTCGTAGTGAGCC	SE associated gene
CBX2	CBX2_a	TGGAGGAGCTGAGCAGCGT	SE associated gene
CBX2	CBX2_b	CTGAGCAGCGTGGGCGAGC	SE associated gene
CBX2	CBX2_c	TTGCTCAGGATGCACTCGG	SE associated gene
CBX2	CBX2_d	CGAGTGCATCCTGAGCAAG	SE associated gene
CBX2	CBX2_e	CGCTTGCTCAGGATGCACT	SE associated gene
CBX2	CBX2_f	GCTGGAGTACCTGGTCAAG	SE associated gene
CBX2	CBX2_g	AGTACCTGGTCAAGTGGCG	SE associated gene
CBX2	CBX2_h	CCTGGTCAAGTGGCGCGGC	SE associated gene
CBX8	CBX8_a	GGCCGAAGCCCTCCTGAAG	SE associated gene
CBX8	CBX8_b	CCTCCTGAAGCGGCGCATA	SE associated gene
CBX8	CBX8_c	CGTATGCGCCGCTTCAGGA	SE associated gene
CBX8	CBX8_d	CATGGAATACCTCGTGAAA	SE associated gene
CBX8	CBX8_e	GAATACCTCGTGAAATGGA	SE associated gene
CBX8	CBX8_f	CCTCGTGAAATGGAAGGGA	SE associated gene
CBX8	CBX8_g	CCATCCCTTCCATTTCACG	SE associated gene
CBX8	CBX8_h	TACAGCACATGGGAACCGG	SE associated gene
CCDC101	CCDC101_a	CGGGAATCGGCAGACACGA	SE associated gene
CCDC101	CCDC101_b	AGTTCTGCAATGCGGGAAT	SE associated gene
CCDC101	CCDC101_c	GTGAGAAGTTCTGCAATGC	SE associated gene
CCDC101	CCDC101_d	GGTTTGTTTGATCAGCTGA	SE associated gene
CCDC101	CCDC101_e	CATCCAGAAGACCCATGAG	SE associated gene
CCDC101	CCDC101_f	CATCCGCTCATGGGTCTTC	SE associated gene
CCDC101	CCDC101_g	CTCTGTCTGCATCCGCTCA	SE associated gene
CCDC101	CCDC101_h	CGCAGCTTTGTCCGGTAAT	SE associated gene
CCDC124	CCDC124_a	TTCTCACCCTGGAACTTCT	SE associated gene
CCDC124	CCDC124_b	CAGGGTGAGAACACCAAGT	SE associated gene
CCDC124	CCDC124_c	CGACTTGGTGTTCTCACCC	SE associated gene
CCDC124	CCDC124_d	GAGAACACCAAGTCGGCAG	SE associated gene
CCDC124	CCDC124_e	CACCAAGTCGGCAGCGGCC	SE associated gene
CCDC124	CCDC124_f	GCAGCGGCCCGGGCACGTA	SE associated gene
CCDC124	CCDC124_g	GCCCGGGCACGTAGGGCAG	SE associated gene
CCDC124	CCDC124_h	GGCCTCTGCCCTACGTGCC	SE associated gene
CCDC125	CCDC125_a	GAGTCAGACGTGCAGCTCT	SE associated gene
CCDC125	CCDC125_b	CAGCTCTGGGAAACAGAAG	SE associated gene
CCDC125	CCDC125_c	AAGAGGATGACATGACAGA	SE associated gene
CCDC125	CCDC125_d	CAGAAGGTGATTTAGGGTA	SE associated gene
CCDC125	CCDC125_e	GTGATTTAGGGTATGGCCT	SE associated gene
CCDC125	CCDC125_f	TTTAGGGTATGGCCTCGGA	SE associated gene
CCDC125	CCDC125_g	ATGGCCTCGGAAGGAAACC	SE associated gene
CCDC125	CCDC125_h	GCCTCGGAAGGAAACCTGG	SE associated gene
CCDC40	CCDC40_a	TCCCATCCGGAAGATGGAT	SE associated gene
CCDC40	CCDC40_b	GCCGATCCATCTTCCGGAT	SE associated gene
CCDC40	CCDC40_c	CAGAAGCCGATCCATCTTC	SE associated gene
CCDC40	CCDC40_d	GAAGATGGATCGGCTTCTG	SE associated gene
CCDC40	CCDC40_e	TCGGCTTCTGAGGGAGAGA	SE associated gene
CCDC40	CCDC40_f	TTCTGAGGGAGAGAAGGAA	SE associated gene
CCDC40	CCDC40_g	CACCACCAGAGAAGGATGA	SE associated gene
CCDC40	CCDC40_h	GGCCATCATCCTTCTCTGG	SE associated gene
CCND1	CCND1_a	CAGCTCCTGTGCTGCGAAG	SE associated gene
CCND1	CCND1_b	CACTTCGCAGCACAGGAGC	SE associated gene
CCND1	CCND1_c	GGTTTCCACTTCGCAGCAC	SE associated gene
CCND1	CCND1_d	GTTGAGGAGGTTGGCATCG	SE associated gene
CCND1	CCND1_e	TGCCAACCTCCTCAACGAC	SE associated gene
CCND1	CCND1_f	ACCCGGTCGTTGAGGAGGT	SE associated gene
CCND1	CCND1_g	CAGCACCCGGTCGTTGAGG	SE associated gene
CCND1	CCND1_h	CTCAACGACCGGGTGCTGC	SE associated gene
CDK7	CDK7_a	GGCTCTGGACGTGAAGTCT	epi genes
CDK7	CDK7_b	GCAAAGCGTTATGAGAAGC	epi genes
CDK7	CDK7_c	ATGAGAAGCTGGACTTCCT	epi genes
CDK7	CDK7_d	GAGAAGCTGGACTTCCTTG	epi genes
CDK7	CDK7_e	TCTCTGGCCTTGTAAACGG	epi genes
CDK7	CDK7_f	TTATCTCTGGCCTTGTAAA	epi genes
CDK7	CDK7_g	TTAATGGCGACAATTTGGT	epi genes
CDK7	CDK7_h	TGAAGAGTCATCAACATGT	epi genes
CDK9	CDK9_a	GCAAAGCAGTACGACTCGG	epi genes
CDK9	CDK9_b	ACGAGAAGCTCGCCAAGAT	epi genes
CDK9	CDK9_c	AGCTCGCCAAGATCGGCCA	epi genes
CDK9	CDK9_d	AAGGTGCCTTGGCCGATCT	epi genes
CDK9	CDK9_e	AGGCCAGGCACCGCAAGAC	epi genes
CDK9	CDK9_f	TGGCCGGTCTTGCGGTGCC	epi genes
CDK9	CDK9_g	CACCGCAAGACCGGCCAGA	epi genes
CDK9	CDK9_h	CGCAAGACCGGCCAGAAGG	epi genes
CEBPA	CEBPA_a	CGGCCGCCGGCTACCTGGA	SE associated gene
CEBPA	CEBPA_b	CGCCGGCTACCTGGACGGC	SE associated gene
CEBPA	CEBPA_c	CTGCCGTCCAGGTAGCCGG	SE associated gene
CEBPA	CEBPA_d	GGCTACCTGGACGGCAGGC	SE associated gene
CEBPA	CEBPA_e	AGCCTGCCGTCCAGGTAGC	SE associated gene
CEBPA	CEBPA_f	TCACCAGCGGCCGCAGCGC	SE associated gene
CEBPA	CEBPA_g	CGGCCGCTGGTGATCAAGC	SE associated gene
CEBPA	CEBPA_h	GCTCCTGCTTGATCACCAG	SE associated gene
CELSR2	CELSR2_a	CTGCTGCCGCCGCCACTAT	SE associated gene
CELSR2	CELSR2_b	GGTCTCCCAATAGTGGCGG	SE associated gene
CELSR2	CELSR2_c	CTTGGTCTCCCAATAGTGG	SE associated gene
CELSR2	CELSR2_d	CCACTATTGGGAGACCAAG	SE associated gene
CELSR2	CELSR2_e	CCACTTGGTCTCCCAATAG	SE associated gene
CELSR2	CELSR2_f	ATCCTCAGCGTCGAACCTC	SE associated gene
CELSR2	CELSR2_g	AGAGGTTCGACGCTGAGGA	SE associated gene
CELSR2	CELSR2_h	AGCCAGAGGTTCGACGCTG	SE associated gene
CGN	CGN_a	ACCCAACATGGCTGAGCCC	SE associated gene
CGN	CGN_b	CTGGACTCCATGGTCTACG	SE associated gene
CGN	CGN_c	GAAGCGAATCTGGACTCCA	SE associated gene
CGN	CGN_d	CTCTGTGATGAAGCGAATC	SE associated gene
CGN	CGN_e	TCATCACAGAGCCAGTGAG	SE associated gene
CGN	CGN_f	AGATGGGCACTCTACGTCG	SE associated gene
CGN	CGN_g	TGGGCACTCTACGTCGAGG	SE associated gene
CGN	CGN_h	GGTGGACGACGCCCAGCTA	SE associated gene
CHCHD2	CHCHD2_a	TGCTGCTGCTGTGCTGGCT	SE associated gene
CHCHD2	CHCHD2_b	GTTTGATCTCATAGAGGCA	SE associated gene
CHCHD2	CHCHD2_c	AAACTGTTTGATCTCATAG	SE associated gene
CHD1	CHD1_a	AAAGTGTTAGAAACAGTAG	epi genes
CHD1	CHD1_b	CCCAGAATCATCATCCGAC	epi genes
CHD1	CHD1_c	ATGATTCTGGGTCAGCTTC	epi genes
CHD1	CHD1_d	CTGGGTCAGCTTCAGGCTC	epi genes
CHD1	CHD1_e	CAGCTTCAGGCTCTGGATC	epi genes
CHD1	CHD1_f	CTGGATCTGGTTCGAGTTC	epi genes
CHD1	CHD1_g	GTTCTGGAAGCAGTAGTGA	epi genes
CHD1	CHD1_h	ATGGAAGCAGTAGCCAGTC	epi genes
CHKA	CHKA_a	AAACCAAATTCTGCACCGG	SE associated gene
CHKA	CHKA_b	AGGCGGAGCCCTCGCCGCT	SE associated gene
CHKA	CHKA_c	GCAGCAGCCCGAGCGGCGA	SE associated gene
CHKA	CHKA_d	AGCTCAGCAGCAGCCCGAG	SE associated gene
CHKA	CHKA_e	TCGGGCTGCTGCTGAGCTG	SE associated gene
CHKA	CHKA_f	TGCTGCTGAGCTGCGGTAG	SE associated gene
CHKA	CHKA_g	AGCTGCGGTAGCGGCAGCG	SE associated gene
CHKA	CHKA_h	TTGGACTCGAGGTCGCTGG	SE associated gene
CHST12	CHST12_a	GACCAAGGCCCGGCTGTTC	SE associated gene
CHST12	CHST12_b	AGCCGGAACAGCCGGGCCT	SE associated gene
CHST12	CHST12_c	GGCCCGGCTGTTCCGGCTG	SE associated gene
CHST12	CHST12_d	CGGCTGTTCCGGCTGTGGC	SE associated gene
CHST12	CHST12_e	CAGCCACAGCCGGAACAGC	SE associated gene
CHST12	CHST12_f	TCCGGCTGTGGCTGGTGCT	SE associated gene
CHST12	CHST12_g	CCTGCTGATCATCGTGTAC	SE associated gene
CHST12	CHST12_h	CCAGTACACGATGATCAGC	SE associated gene
CHST8	CHST8_a	CCTGCGACCTGGAACAATG	SE associated gene
CHST8	CHST8_b	CCGCATTGTTCCAGGTCGC	SE associated gene
CHST8	CHST8_c	CGACCTGGAACAATGCGGC	SE associated gene
CHST8	CHST8_d	AGGCCAGCCGCATTGTTCC	SE associated gene
CHST8	CHST8_e	AGGATGGAAGAGAACATGC	SE associated gene
CHST8	CHST8_f	TCCTGCTGTTCGGAGCTGC	SE associated gene
CHST8	CHST8_g	GCAGCTCCGAACAGCAGGA	SE associated gene
CHST8	CHST8_h	GCCTGCAGCTCCGAACAGC	SE associated gene
CLIC4	CLIC4_a	GTTGTCGATGCCGCTGAAT	SE associated gene
CLIC4	CLIC4_b	ATGCCGCTGAATGGGCTGA	SE associated gene
CLIC4	CLIC4_c	CCGCTGAATGGGCTGAAGG	SE associated gene
CLIC4	CLIC4_d	CCTCCTTCAGCCCATTCAG	SE associated gene
CLIC4	CLIC4_e	CTGAATGGGCTGAAGGAGG	SE associated gene
CLIC4	CLIC4_f	TTGACGAAGAGCTCGATGA	SE associated gene
CLIC4	CLIC4_g	ATGAAGAGCCTCTGGGAAA	SE associated gene
CLIC4	CLIC4_h	AGAATCATGAAGAGCCTCT	SE associated gene
CLN3	CLN3_a	TCCCACTGACGAGAACCCG	SE associated gene
CLN3	CLN3_b	TCAGTGGGATTTGTGCTGC	SE associated gene
CLN3	CLN3_c	GCTGCTGGAAGCTTCGTCC	SE associated gene
CLN3	CLN3_d	TCTTCGCTAGCATCTCATC	SE associated gene
CLN3	CLN3_e	CTAGCATCTCATCAGGCCT	SE associated gene
CLN3	CLN3_f	AGCATCTCATCAGGCCTTG	SE associated gene
CLN3	CLN3_g	TGATCTCCTGGTGGTCCTC	SE associated gene
CLN3	CLN3_h	CCTGGTGGTCCTCAGGGAC	SE associated gene
CLPTM1L	CLPTM1L_a	CGCAGCTCCTTCACCAGCT	SE associated gene
CLPTM1L	CLPTM1L_b	CAAGCTGGTGAAGGAGCTG	SE associated gene
CLPTM1L	CLPTM1L_c	AGCTCCTTCACCAGCTTGG	SE associated gene
CLPTM1L	CLPTM1L_d	TCCTTCACCAGCTTGGTGG	SE associated gene
CLPTM1L	CLPTM1L_e	CCCACCACCAAGCTGGTGA	SE associated gene
CLPTM1L	CLPTM1L_f	AACACGCCCACCACCAAGC	SE associated gene
CLPTM1L	CLPTM1L_g	TTGGTGGTGGGCGTGTTCG	SE associated gene
CLPTM1L	CLPTM1L_h	GGCGTGTTCGTGGTCTACG	SE associated gene
CLTC	CLTC_a	AAACGAATTGGCAGAATCT	SE associated gene
CLTC	CLTC_b	TGGGTTGATACCCAGGTTC	SE associated gene
CLTC	CLTC_c	GTTTGCTGGGTTGATACCC	SE associated gene
CLTC	CLTC_d	GTATCAACCCAGCAAACAT	SE associated gene
CLTC	CLTC_e	ACTGAAGCCAATGTTTGCT	SE associated gene
CLTC	CLTC_f	GGCTTCAGTACCCTGACTA	SE associated gene
CLTC	CLTC_g	TTTGTCAGACTCCATAGTC	SE associated gene
CLTC	CLTC_h	AAAGTAGGAGAGCAGGCCC	SE associated gene
CNNM3	CNNM3_a	GGCGGTAGCTGCGGCGGGT	SE associated gene
CNNM3	CNNM3_b	TGCGGCGGGTCGGTTAGGC	SE associated gene
CNNM3	CNNM3_c	TGTTCGCCGCGCTCTGCCT	SE associated gene
CNNM3	CNNM3_d	GCGTTGCCCAGGCAGAGCG	SE associated gene
CNNM3	CNNM3_e	CTCTGCCTGGGCAACGCCG	SE associated gene
CNNM3	CNNM3_f	AGCCCAGCACTCGCGGGCC	SE associated gene
CNNM3	CNNM3_g	GCAGAAGCCCAGCACTCGC	SE associated gene
CNNM3	CNNM3_h	CGAGTGCTGGGCTTCTGCC	SE associated gene
CNNM4	CNNM4_a	ACAGCAGCACCAGCAGCAC	SE associated gene
CNNM4	CNNM4_b	CTGGTGCTGCTGTGGGCGC	SE associated gene
CNNM4	CNNM4_c	GTGCTGCTGTGGGCGCTGG	SE associated gene
CNNM4	CNNM4_d	CCCAGCAGGGCACGATCGT	SE associated gene
CNNM4	CNNM4_e	CCCACGATCGTGCCCTGCT	SE associated gene
CNNM4	CNNM4_f	ACGATCGTGGGCATGAGGC	SE associated gene
CNNM4	CNNM4_g	CGAGCTGCAACAAGTCGTG	SE associated gene
CNNM4	CNNM4_h	AAGTCGTGTGGGACGAACC	SE associated gene
COL15A1	COL15A1_a	TGTCTGCTGATGCTGCTCT	SE associated gene
COL15A1	COL15A1_b	TCTGGGTGACAGCAGGGAG	SE associated gene
COL15A1	COL15A1_c	GGTCTGGGTGACAGCAGGG	SE associated gene
COL15A1	COL15A1_d	CTGCTGTCACCCAGACCCG	SE associated gene
COL15A1	COL15A1_e	CGCGGGTCTGGGTGACAGC	SE associated gene
COL15A1	COL15A1_f	ACTGCTTCCCAGGGTCACC	SE associated gene
COL15A1	COL15A1_g	GTGAGGTCCAGGTGACCCT	SE associated gene
COL15A1	COL15A1_h	TGGACCTCACGCAGCTCAT	SE associated gene
COL6A1	COL6A1_a	CAGCAGGCCTGCAGCAGCA	SE associated gene
COL6A1	COL6A1_b	GCCTGCTGGACAGCCGCGC	SE associated gene
COL6A1	COL6A1_c	TCCTGCGCGGCTGTCCAGC	SE associated gene
COL6A1	COL6A1_d	ACAGCCGCGCAGGATGAGC	SE associated gene
COL6A1	COL6A1_e	GTCTCCGGCTCATCCTGCG	SE associated gene
COL6A1	COL6A1_f	CCGAGGGCCGTGGCCTTCC	SE associated gene
COL6A1	COL6A1_g	CTGGAAGGCCACGGCCCTC	SE associated gene
COL6A1	COL6A1_h	CACAAAGAACAGGTCCACG	SE associated gene
COL6A2	COL6A2_a	CTGCTCCGTGCTCCTGCTC	SE associated gene
COL6A2	COL6A2_b	CAGAGCAGGAGCACGGAGC	SE associated gene
COL6A2	COL6A2_c	GCTCCGTGCTCCTGCTCTG	SE associated gene
COL6A2	COL6A2_d	GCCATCCAGGCCCAGCAGC	SE associated gene
COL6A2	COL6A2_e	TCCTGCTGCTGGGCCTGGA	SE associated gene
COL6A2	COL6A2_f	GACCTCCTGCTGCTGGGCC	SE associated gene
COL6A2	COL6A2_g	CGAGATGACCTCCTGCTGC	SE associated gene
COL6A2	COL6A2_h	CAGCAGGAGGTCATCTCGC	SE associated gene
COL6A3	COL6A3_a	CATCGGCACTTGCCCTTAG	SE associated gene
COL6A3	COL6A3_b	GCTGCTGGGCATGAGTTGT	SE associated gene
COL6A3	COL6A3_c	AAGAGAGACATAGTCTTCC	SE associated gene
COL6A3	COL6A3_d	AGAGACATAGTCTTCCTGG	SE associated gene
COL6A3	COL6A3_e	ACATAGTCTTCCTGGTGGA	SE associated gene
COL6A3	COL6A3_f	TGCAGATGAGCCATCCACC	SE associated gene
COL6A3	COL6A3_g	GTGGATGGCTCATCTGCAC	SE associated gene
COL6A3	COL6A3_h	GGCTCATCTGCACTGGGAC	SE associated gene
COPS8	COPS8_a	GTCAGTAGGACAAAGAATC	SE associated gene
COPS8	COPS8_b	AACCATCAACGCTCACCAG	SE associated gene
COPS8	COPS8_c	GCTCACCAGTGGTCTGAGA	SE associated gene
COPS8	COPS8_d	CTGGACCGTCTCAGACCAC	SE associated gene
COPS8	COPS8_e	GAGACGGTCCAGCCAATTA	SE associated gene
COPS8	COPS8_f	AGGAGACGCGCCTTTGCCC	SE associated gene
COPS8	COPS8_g	GTATACGCTTGAGAGACCA	SE associated gene
COPS8	COPS8_h	TCTACAGGAAGTCCAACAA	SE associated gene
COQ2	COQ2_a	ATCCTTACTTGTGAAATTG	SE associated gene
COQ2	COQ2_b	AATTTCACAAGTAAGGATG	SE associated gene
COQ2	COQ2_c	TCATCCTTACTTGTGAAAT	SE associated gene
COQ2	COQ2_d	CACAAGTAAGGATGAGGAA	SE associated gene
COQ2	COQ2_e	AGTCTGCCAGGCTGGGCGG	SE associated gene
COQ2	COQ2_f	AATCCTAGTCTGCCAGGCT	SE associated gene
COQ2	COQ2_g	GATGCAATCCTAGTCTGCC	SE associated gene
COQ2	COQ2_h	GACTAGGATTGCATCCTGC	SE associated gene
COQ9	COQ9_a	TGGCGGCGGCGGCGGTATC	SE associated gene
COQ9	COQ9_b	CGGCGGTATCTGGTGCGCT	SE associated gene
COQ9	COQ9_c	GGTATCTGGTGCGCTTGGC	SE associated gene
COQ9	COQ9_d	TCTGGTGCGCTTGGCCGGG	SE associated gene
COQ9	COQ9_e	CAGGAGCCTCCAGCCCGCC	SE associated gene
COQ9	COQ9_f	GCCCGTTGCCGACAAGCCC	SE associated gene
COQ9	COQ9_g	ACCAGGGCTTGTCGGCAAC	SE associated gene
COQ9	COQ9_h	ACGCGGCACCAGGGCTTGT	SE associated gene
CP	CP_a	TGGAATTATTGAAACGACT	SE associated gene
CP	CP_b	GGATTATGCCTCTGACCAT	SE associated gene
CP	CP_c	TAGTCTCCCAATTCTATCT	SE associated gene
CP	CP_d	ATTGGGAGACTATATAAGA	SE associated gene
CP	CP_e	TCTGTGTACTGAAGATAAA	SE associated gene
CP	CP_f	CTATTATCAAAGCTGAAAC	SE associated gene
CP	CP_g	AGTTTCAGCTTTGATAATA	SE associated gene
CP	CP_h	GGTGTAGGGCCTAGAGGCA	SE associated gene
CREBBP	CREBBP_a	GAGCCAAACTCAGCTCGCC	epi genes
CREBBP	CREBBP_b	TGTCATTCGCCGAGAAACC	epi genes
CREBBP	CREBBP_c	TTTGGATCATTGTTTGACT	epi genes
CREBBP	CREBBP_d	CTGATGAGCTGATACCCAA	epi genes
CREBBP	CREBBP_e	CATTGGGTATCAGCTCATC	epi genes
CREBBP	CREBBP_f	ATGAGCTGATACCCAATGG	epi genes
CREBBP	CREBBP_g	AGGCCTAATTCTCCTCCAT	epi genes
CREBBP	CREBBP_h	AAGGTTCCCACTGTTTAAA	epi genes
CRISPLD2	CRISPLD2_a	GGCTGCTGTTCCTGGTCTG	SE associated gene
CRISPLD2	CRISPLD2_b	TCCTGGTCTGCGGATCCCA	SE associated gene
CRISPLD2	CRISPLD2_c	GCCTTGGGATCCGCAGACC	SE associated gene
CRISPLD2	CRISPLD2_d	GTTGGGCAGGAGGTAGCCT	SE associated gene
CRISPLD2	CRISPLD2_e	GAGAGTGACGTTGGGCAGG	SE associated gene
CRISPLD2	CRISPLD2_f	TAAGAGAGTGACGTTGGGC	SE associated gene
CRISPLD2	CRISPLD2_g	CCCAACGTCACTCTCTTAG	SE associated gene
CRISPLD2	CRISPLD2_h	TCCTCTAAGAGAGTGACGT	SE associated gene
CRYBA2	CRYBA2_a	GCCCGCCAGCCTCACGCTC	SE associated gene
CRYBA2	CRYBA2_b	CCCAGAGCGTGAGGCTGGC	SE associated gene
CRYBA2	CRYBA2_c	AGCCTCACGCTCTGGGACG	SE associated gene
CRYBA2	CRYBA2_d	TCGTCCCAGAGCGTGAGGC	SE associated gene
CRYBA2	CRYBA2_e	CTCACGCTCTGGGACGAGG	SE associated gene
CRYBA2	CRYBA2_f	CTCCTCGTCCCAGAGCGTG	SE associated gene
CRYBA2	CRYBA2_g	CTTCCAGGGCCGTCGCTGT	SE associated gene
CRYBA2	CRYBA2_h	CAGCCGACAGCGACGGCCC	SE associated gene
CTCF	CTCF_a	TTTGTGACCAGTGGAGAAT	epi genes
CTCF	CTCF_b	TGCCGAACCAATTCTCCAC	epi genes
CTCF	CTCF_c	ACACTTGAATGGCTTCTCG	epi genes
CTCF	CTCF_d	CGCACATGGAACACTTGAA	epi genes
CTCF	CTCF_e	ACACTGGCGTAATCGCACA	epi genes
CTCF	CTCF_f	GTCACATTCGCTCTCATAC	epi genes
CTCF	CTCF_g	TGCACAAACTGCACTGAAA	epi genes
CTCF	CTCF_h	TTGTGCAGTTATGCCAGCA	epi genes
CX3CL1	CX3CL1_a	GGCTCCGATATCTCTGTCG	SE associated gene
CX3CL1	CX3CL1_b	GCAGCCACGACAGAGATAT	SE associated gene
CX3CL1	CX3CL1_c	CTGTCGTGGCTGCTCCGCT	SE associated gene
CX3CL1	CX3CL1_d	ATGGCAGAAGGTGGCCAAG	SE associated gene
CX3CL1	CX3CL1_e	ACAGTCAGATGGCAGAAGG	SE associated gene
CX3CL1	CX3CL1_f	TGCCATCTGACTGTCCTGC	SE associated gene
CX3CL1	CX3CL1_g	GTTGCATTTCGTCACACCG	SE associated gene
CX3CL1	CX3CL1_h	AGTGGATGAGCAAAGCTAC	SE associated gene
CXCL16	CXCL16_a	TCTGGGAGTCAGAGCGAGG	SE associated gene
CXCL16	CXCL16_b	CGAGATGGGACGGGACTTG	SE associated gene
CXCL16	CXCL16_c	CAAGTCCCGTCCCATCTCG	SE associated gene
CXCL16	CXCL16_d	CGCAAGTCCCGTCCCATCT	SE associated gene
CXCL16	CXCL16_e	TGGGACGGGACTTGCGGCC	SE associated gene
CXCL16	CXCL16_f	AGCAGGAGCACGCGGGACC	SE associated gene
CXCL16	CXCL16_g	AAGCAGGAGCAGGAGCACG	SE associated gene
CXCL16	CXCL16_h	CACCAGCAGGAGCAGAAGC	SE associated gene
CYB561	CYB561_a	GTAGTAAGGCAGTGCTGTG	SE associated gene
CYB561	CYB561_b	ACAGCACTGCCTTACTACG	SE associated gene
CYB561	CYB561_c	CGTAGTAAGGCAGTGCTGT	SE associated gene
CYB561	CYB561_d	CAGCTGCTGGGCCTGACCT	SE associated gene
CYB561	CYB561_e	AAGGTCAGGCCCAGCAGCT	SE associated gene
CYB561	CYB561_f	CTGCTGGGCCTGACCTTGG	SE associated gene
CYB561	CYB561_g	TGACCTTGGTGGCCATGAC	SE associated gene
CYB561	CYB561_h	GGTCATGGCCACCAAGGTC	SE associated gene
CYR61	CYR61_a	GCGAGCGCCCTGGCGATGC	SE associated gene
CYR61	CYR61_b	ACGACTAAGGCGAGCGCCC	SE associated gene
CYR61	CYR61_c	TGGAGAAGGGTGACGACTA	SE associated gene
CYR61	CYR61_d	CACCCTTCTCCACTTGACC	SE associated gene
CYR61	CYR61_e	AGCCTGGTCAAGTGGAGAA	SE associated gene
CYR61	CYR61_f	GCGCACTTGGGCGCCTCCA	SE associated gene
CYR61	CYR61_g	GAGGCGCCCAAGTGCGCGC	SE associated gene
CYR61	CYR61_h	CAAGTGCGCGCCGGGAGTC	SE associated gene
DCAF5	DCAF5_a	GGAACAAGCCATCCACTCC	SE associated gene
DCAF5	DCAF5_b	GGCTTGACCCTGGAGTGGA	SE associated gene
DCAF5	DCAF5_c	TATGGGCTTGACCCTGGAG	SE associated gene
DCAF5	DCAF5_d	AGCTGTATGGGCTTGACCC	SE associated gene
DCAF5	DCAF5_e	TCAAGCCCATACAGCTGAA	SE associated gene
DCAF5	DCAF5_f	GCTCTCCTTTCAGCTGTAT	SE associated gene
DCAF5	DCAF5_g	TTGCCTGGCTTTCAACAGT	SE associated gene
DCAF5	DCAF5_h	GTTCCCACTGTTGAAAGCC	SE associated gene
DDAH1	DDAH1_a	CAACGAGGTGCTGAAATCT	SE associated gene
DDAH1	DDAH1_b	GCAGTCTCCACAGTGCCAG	SE associated gene
DDAH1	DDAH1_c	CACAGTGCCAGTGGCAGAT	SE associated gene
DDAH1	DDAH1_d	CCATCTGCCACTGGCACTG	SE associated gene
DDAH1	DDAH1_e	AATGCAACCCATCTGCCAC	SE associated gene
DDAH1	DDAH1_f	TTGAAGAGTTTCTGCAGCA	SE associated gene
DDAH1	DDAH1_g	AGAGTTTCTGCAGCATGGC	SE associated gene
DDAH1	DDAH1_h	GGCCTAACCTGATCGCAAT	SE associated gene
DDX3X	DDX3X_a	ATCTGAAGAGTTCAGGTCT	SE associated gene
DDX3X	DDX3X_b	CTGATTATCTGAAGAGTTC	SE associated gene
DDX3X	DDX3X_c	ACTCTTCAGATAATCAGAG	SE associated gene
DDX3X	DDX3X_d	TCTACGATAAAGACAGTTC	SE associated gene
DDX3X	DDX3X_e	CGATAAAGACAGTTCAGGG	SE associated gene
DDX3X	DDX3X_f	GATCTCGTAGTGATTCAAG	SE associated gene
DDX3X	DDX3X_g	CTAGCTTCTTCAGTGATCG	SE associated gene
DDX3X	DDX3X_h	TCTTCAGTGATCGTGGAAG	SE associated gene
DEGS1	DEGS1_a	GAAGTCTTCCCGCGAGACG	SE associated gene
DEGS1	DEGS1_b	CTCGCGGGAAGACTTCGAG	SE associated gene
DEGS1	DEGS1_c	CGACCAGCCGCACGCCGAC	SE associated gene
DEGS1	DEGS1_d	CGGTCGGCGTGCGGCTGGT	SE associated gene
DEGS1	DEGS1_e	GACCGGCGCCGGGAGATCC	SE associated gene
DEGS1	DEGS1_f	AGGATCTCCCGGCGCCGGT	SE associated gene
DEGS1	DEGS1_g	TCATCAAGGACTTTATCTC	SE associated gene
DEGS1	DEGS1_h	TTGGGATCAGGTTTCATCA	SE associated gene
DHRS3	DHRS3_a	TGGAAACGGCTGGGCGCGC	SE associated gene
DHRS3	DHRS3_b	CCTCTACAGATGATCTATC	SE associated gene
DHRS3	DHRS3_c	CCAGATAGATCATCTGTAG	SE associated gene
DHRS3	DHRS3_d	CTACAGATGATCTATCTGG	SE associated gene
DHRS3	DHRS3_e	TGGTGGTGAAAGCAGCCGT	SE associated gene
DHRS3	DHRS3_f	GTGAAAGCAGCCGTCGGAC	SE associated gene
DHRS3	DHRS3_g	GCGGGCAGCACCAGTCCGA	SE associated gene
DHRS3	DHRS3_h	GGTGCTGCCCGCCAAGCTG	SE associated gene
DLX3	DLX3_a	CTGCTGAGCTTGCGATCGA	SE associated gene
DLX3	DLX3_b	GGAGCTGGAGATGTCGGTG	SE associated gene
DLX3	DLX3_c	AGCTCCCTTAGCTGCCATG	SE associated gene
DLX3	DLX3_d	GCATGGCAGCTAAGGGAGC	SE associated gene
DLX3	DLX3_e	GGAGCCCGCATGGCAGCTA	SE associated gene
DLX3	DLX3_f	AGCTGCCATGCGGGCTCCA	SE associated gene
DLX3	DLX3_g	CGAGTCCTTGGAGCCCGCA	SE associated gene
DLX3	DLX3_h	GGCAGGGTAGGCGAGTCCT	SE associated gene
DNMT1	DNMT1_a	CCAGCCCGGGTGCCCACAC	epi genes
DNMT1	DNMT1_b	CCAGTGTGGGCACCCGGGC	epi genes
DNMT1	DNMT1_c	GACGGCCAGTGTGGGCACC	epi genes
DNMT1	DNMT1_d	GTGCCCACACTGGCCGTCC	epi genes
DNMT1	DNMT1_e	ATGGCCGGGACGGCCAGTG	epi genes
DNMT1	DNMT1_f	GGCAGCGAGATGGCCGGGA	epi genes
DNMT1	DNMT1_g	GTCGGGCAGCGAGATGGCC	epi genes
DNMT1	DNMT1_h	ACATCGTCGGGCAGCGAGA	epi genes
DNMT3L	DNMT3L_a	CGGCCTCTGGGTCCAGGGC	SE associated gene
DNMT3L	DNMT3L_b	GGCTCGGCCTCTGGGTCCA	SE associated gene
DNMT3L	DNMT3L_c	CCAGAGGCCGAGCCCAGCA	SE associated gene
DNMT3L	DNMT3L_d	CATGCTGGGCTCGGCCTCT	SE associated gene
DNMT3L	DNMT3L_e	ATCACGTCCATGCTGGGCT	SE associated gene
DNMT3L	DNMT3L_f	ACGGAGCTTGAGAGCTCAC	SE associated gene
DNMT3L	DNMT3L_g	TCTCAAGCTCCGTTTCACC	SE associated gene
DNMT3L	DNMT3L_h	GCTCCGTTTCACCCGGGAC	SE associated gene
DOPEY2	DOPEY2_a	TTAAGAGCTCCTGCTCTTC	SE associated gene
DOPEY2	DOPEY2_b	TACTCTTCAGTGATTGAAA	SE associated gene
DOPEY2	DOPEY2_c	TTTGAGTCCTCGAGTGAAT	SE associated gene
DOPEY2	DOPEY2_d	GAGTCCTCGAGTGAATGGG	SE associated gene
DOPEY2	DOPEY2_e	AGATCCGCCCATTCACTCG	SE associated gene
DOPEY2	DOPEY2_f	CGGATCTCATATCTTCACT	SE associated gene
DOPEY2	DOPEY2_g	TGGCAACAAGGAGTACCTC	SE associated gene
DOPEY2	DOPEY2_h	GTACTCCTTGTTGCCAAGA	SE associated gene
DOT1L	DOT1L_a	TGAGACTGAAGTCGCCCGT	epi genes
DOT1L	DOT1L_b	TGAGCCCGCCGTCTACCCG	epi genes
DOT1L	DOT1L_c	AGCGGCCACGGGTAGACGG	epi genes
DOT1L	DOT1L_d	GTCTACCCGTGGCCGCTGC	epi genes
DOT1L	DOT1L_e	GGCAGCGGCCACGGGTAGA	epi genes
DOT1L	DOT1L_f	TGGGTCTGTGAAGAAATCC	epi genes
DOT1L	DOT1L_g	CCGGATCTCAAGCTCGCTA	epi genes
DOT1L	DOT1L_h	CATAGCGAGCTTGAGATCC	epi genes
DTX4	DTX4_a	CTCCTGGCCTCGGCCGTGG	SE associated gene
DTX4	DTX4_b	GGCCTCGGCCGTGGTGGTC	SE associated gene
DTX4	DTX4_c	GACCACCACGGCCGAGGCC	SE associated gene
DTX4	DTX4_d	GCCTCGGCCGTGGTGGTCT	SE associated gene
DTX4	DTX4_e	TCCCAGACCACCACGGCCG	SE associated gene
DTX4	DTX4_f	GGCCGTGGTGGTCTGGGAA	SE associated gene
DTX4	DTX4_g	AGCCATTCCCAGACCACCA	SE associated gene
DTX4	DTX4_h	GCTGAACGAGCACGGCCGC	SE associated gene
DUSP15	DUSP15_a	GACGTGCTTGAAGCCATCA	SE associated gene
DUSP15	DUSP15_b	TGAAGCCATCAAGGCCACC	SE associated gene
DUSP15	DUSP15_c	ATGGGCCTGGTGGCCTTGA	SE associated gene
DUSP15	DUSP15_d	CTGCCTAAAGCCTGGGTTG	SE associated gene
DUSP15	DUSP15_e	TGCTGCCTAAAGCCTGGGT	SE associated gene
DUSP15	DUSP15_f	CAAGCTGCTGCCTAAAGCC	SE associated gene
DUSP15	DUSP15_g	GCAGCTTGAAGAGTTTGGC	SE associated gene
DUSP15	DUSP15_h	GAAGCGCTCCTCCAGCTGC	SE associated gene
DUSP8	DUSP8_a	CATCACCTTCCTCGGGAGC	SE associated gene
DUSP8	DUSP8_b	GGCATCCATCACCTTCCTC	SE associated gene
DUSP8	DUSP8_c	AGCGGCTGTCGATGACCAG	SE associated gene
DUSP8	DUSP8_d	ATCGACAGCCGCTCCTTCG	SE associated gene
DUSP8	DUSP8_e	GTTGTACTCCACGAAGGAG	SE associated gene
DUSP8	DUSP8_f	CTTCGTGGAGTACAACAGC	SE associated gene
DUSP8	DUSP8_g	CAGCTGTTGTACTCCACGA	SE associated gene
DUSP8	DUSP8_h	CTCCAAGCTGGTGAAGCGG	SE associated gene
E2F1	E2F1_a	CTCCAGCGCCGGCGCGCAT	SE associated gene
E2F1	E2F1_b	CGGCGCTGGAGGCCCTGCT	SE associated gene
E2F1	E2F1_c	CGAGCAGGGCCTCCAGCGC	SE associated gene
E2F1	E2F1_d	GCGCTGGAGGCCCTGCTCG	SE associated gene
E2F1	E2F1_e	TCGAGCAGCCGCAGCGCGC	SE associated gene
E2F1	E2F1_f	GAGATGATGACGATCTGCG	SE associated gene
E2F1	E2F1_g	GTCATCATCTCCGCCGCGC	SE associated gene
E2F1	E2F1_h	CAGCAGGTCAGGGTCGCAG	SE associated gene
EDIL3	EDIL3_a	GAAGCGCTCGGTAGCCGTC	SE associated gene
EDIL3	EDIL3_b	TCGGTAGCCGTCTGGCTCT	SE associated gene
EDIL3	EDIL3_c	AGCCGTCTGGCTCTTGGTC	SE associated gene
EDIL3	EDIL3_d	AGCCCGACCAAGAGCCAGA	SE associated gene
EDIL3	EDIL3_e	TCTTGGTCGGGCTCAGCCT	SE associated gene
EDIL3	EDIL3_f	ATGGAGGTATCTGTTTGCC	SE associated gene
EDIL3	EDIL3_g	GGTATCTGTTTGCCAGGAT	SE associated gene
EDIL3	EDIL3_h	GTTTGCCAGGATTGGCTGA	SE associated gene
EED	EED_a	GCAGTCGACACTTCCCTCT	epi genes
EED	EED_b	AGGGAAGTGTCGACTGCGC	epi genes
EED	EED_c	GAAGTGTCGACTGCGCCGG	epi genes
EED	EED_d	CAGGCATGTCTGTTCCCGC	epi genes
EED	EED_e	GCGGGAACAGACATGCCTG	epi genes
EED	EED_f	GCTTCTGCTTCTTGGCCGC	epi genes
EED	EED_g	ACAGCAATCCAGACCTCTC	epi genes
EED	EED_h	TCTCGTCTCCAGAGAGGTC	epi genes
EEFSEC	EEFSEC_a	GGCGGGTGAACGTGAACGT	SE associated gene
EEFSEC	EEFSEC_b	AACGTGAACGTGGGCGTGC	SE associated gene
EEFSEC	EEFSEC_c	TGCTGGGCCACATCGACAG	SE associated gene
EEFSEC	EEFSEC_d	CACATCGACAGCGGCAAGA	SE associated gene
EEFSEC	EEFSEC_e	CGTCTTGCCGCTGTCGATG	SE associated gene
EEFSEC	EEFSEC_f	GACAGCGGCAAGACGGCGC	SE associated gene
EEFSEC	EEFSEC_g	CGGCAAGACGGCGCTGGCG	SE associated gene
EEFSEC	EEFSEC_h	AAGGCGGCGGTGGAGGCTG	SE associated gene
EFCAB11	EFCAB11_a	GAAGGAAGCTCAACGATAT	SE associated gene
EFCAB11	EFCAB11_b	CAGGTGGCTCCCAAATTAC	SE associated gene
EFCAB11	EFCAB11_c	GGCTCCCAAATTACCGGAA	SE associated gene
EFCAB11	EFCAB11_d	CCGGAAAGGACTGTTCTTG	SE associated gene
EFCAB11	EFCAB11_e	CATGTGATGAAGATCACAA	SE associated gene
EFCAB11	EFCAB11_f	AAAGGATATCTCAGCAGAG	SE associated gene
EFCAB11	EFCAB11_g	AAGTAGATCGAGATTCAGA	SE associated gene
EFCAB11	EFCAB11_h	TTGAATATGCCCTGAACTA	SE associated gene
EFHD1	EFHD1_a	CATCAGCTTCAGCTCCATC	SE associated gene
EFHD1	EFHD1_b	ATGGAGCTGAAGCTGATGA	SE associated gene
EFHD1	EFHD1_c	GCTGATGATGGAGAAGCTG	SE associated gene
EFHD1	EFHD1_d	AGGCCCAGGTGGGTCTGGG	SE associated gene
EFHD1	EFHD1_e	CTTCAGGCCCAGGTGGGTC	SE associated gene
EFHD1	EFHD1_f	ATGCTCTTCAGGCCCAGGT	SE associated gene
EFHD1	EFHD1_g	GATCATGCTCTTCAGGCCC	SE associated gene
EFHD1	EFHD1_h	GGCCTGAAGAGCATGATCA	SE associated gene
EGFR	EGFR_a	TGCGACCCTCCGGGACGGC	SE associated gene
EGFR	EGFR_b	AGCGCCAGGAGCGCTGCCC	SE associated gene
EGFR	EGFR_c	GCAGCGCTCCTGGCGCTGC	SE associated gene
EGFR	EGFR_d	GAGCGCAGCCAGCAGCGCC	SE associated gene
EGFR	EGFR_e	TGCGCTCTGCCCGGCGAGT	SE associated gene
EGFR	EGFR_f	TGCCCGGCGAGTCGGGCTC	SE associated gene
EGFR	EGFR_g	CCGGCGAGTCGGGCTCTGG	SE associated gene
EGFR	EGFR_h	CCTCCAGAGCCCGACTCGC	SE associated gene
ELF3	ELF3_a	TTCAGTGCGATGTACAGCT	SE associated gene
ELF3	ELF3_b	AGTGCGATGTACAGCTCGG	SE associated gene
ELF3	ELF3_c	AGCTCGGAGGACTCCACCC	SE associated gene
ELF3	ELF3_d	AGGGTCAGTACCAAGTCAT	SE associated gene
ELF3	ELF3_e	TACCCTCCAATGACATCTG	SE associated gene
ELF3	ELF3_f	TGTACCCTCCAATGACATC	SE associated gene
ELF3	ELF3_g	CAGTTCTGGTCGAAGACGC	SE associated gene
ELF3	ELF3_h	CTGCGTCTTCGACCAGAAC	SE associated gene
EN1	EN1_a	GTCAGCGCGACTCGGCCCT	SE associated gene
EN1	EN1_b	TCAGCCTGAGCCTCAGTCC	SE associated gene
EN1	EN1_c	CGGACTGAGGCTCAGGCTG	SE associated gene
EN1	EN1_d	GGCGCCCGGACTGAGGCTC	SE associated gene
EN1	EN1_e	GCCTCAGTCCGGGCGCCAG	SE associated gene
EN1	EN1_f	AGCGATGGAGACAGCGTGC	SE associated gene
EN1	EN1_g	AGGTGCGGGTGGTGGGCCA	SE associated gene
EN1	EN1_h	CCGCCGCCTCAGCATCTCG	SE associated gene
EP300	EP300_a	CGAGAATGTGGTGGAACCG	epi genes
EP300	EP300_b	CCCGGTTCCACCACATTCT	epi genes
EP300	EP300_c	GCTTGGCTGAAGGCGGCCC	epi genes
EP300	EP300_d	TAGGCCGCTTGGCTGAAGG	epi genes
EP300	EP300_e	GTTTAGGCCGCTTGGCTGA	epi genes
EP300	EP300_f	GATGAGAGTTTAGGCCGCT	epi genes
EP300	EP300_g	CGGCCTAAACTCTCATCTC	epi genes
EP300	EP300_h	CTCTCATCTCCGGCCCTCT	epi genes
EPCAM	EPCAM_a	CCCGCAGGTCCTCGCGTTC	SE associated gene
EPCAM	EPCAM_b	CCCGAACGCGAGGACCTGC	SE associated gene
EPCAM	EPCAM_c	AAGCAGAAGCCCGAACGCG	SE associated gene
EPCAM	EPCAM_d	TTCGGGCTTCTGCTTGCCG	SE associated gene
EPCAM	EPCAM_e	CTTCTGCTTGCCGCGGCGA	SE associated gene
EPCAM	EPCAM_f	AATGCCAGTGTACTTCAGT	SE associated gene
EPCAM	EPCAM_g	TGCACCAACTGAAGTACAC	SE associated gene
EPCAM	EPCAM_h	GCCAAATGTTTGGTGATGA	SE associated gene
EPHB2	EPHB2_a	ACTACAGCGACTGCTGAGC	SE associated gene
EPHB2	EPHB2_b	AGCTCAGCAGTCGCTGTAG	SE associated gene
EPHB2	EPHB2_c	CTACAGCGACTGCTGAGCT	SE associated gene
EPHB2	EPHB2_d	AGCGACTGCTGAGCTGGGC	SE associated gene
EPHB2	EPHB2_e	GATGGTGCATCCTCCATCA	SE associated gene
EPHB2	EPHB2_f	AACACGATCCGCACGTACC	SE associated gene
EPHB2	EPHB2_g	CTCAAACACGTTGCACACC	SE associated gene
EPHB2	EPHB2_h	AAGCCAGAACAACTGGCTA	SE associated gene
EPHB3	EPHB3_a	GGAGCAGCGGCAGAAGCCC	SE associated gene
EPHB3	EPHB3_b	GCAGCAGCGGAGGGAGCAG	SE associated gene
EPHB3	EPHB3_c	CGCTGCTGCTGCTGCCCGC	SE associated gene
EPHB3	EPHB3_d	AAATGGGTAACATCTGAGT	SE associated gene
EPHB3	EPHB3_e	GGTAACATCTGAGTTGGCG	SE associated gene
EPHB3	EPHB3_f	GGACATCTCATCCAGAAAG	SE associated gene
EPHB3	EPHB3_g	GAGGTGAGTGGCTACGATG	SE associated gene
EPHB3	EPHB3_h	TATGTGCGGATGGGATTCA	SE associated gene
EPS8L1	EPS8L1_a	GATCCGAGAGGACATCCAG	SE associated gene
EPS8L1	EPS8L1_b	CTCTGCACAATTACCGCTC	SE associated gene
EPS8L1	EPS8L1_c	CAATTACCGCTCGGGCCGC	SE associated gene
EPS8L1	EPS8L1_d	CGCTGCAACTCCTCCTGCG	SE associated gene
EPS8L1	EPS8L1_e	GGTCTCAGCGGCGGGCGAG	SE associated gene
EPS8L1	EPS8L1_f	ACTGACGGGCGGCGCTGCA	SE associated gene
EPS8L1	EPS8L1_g	CACTGCGCGGACTGACGGG	SE associated gene
EPS8L1	EPS8L1_h	GATCACTGCGCGGACTGAC	SE associated gene
ERMP1	ERMP1_a	TTCTGAGTCGGCTGCTGTG	SE associated gene
ERMP1	ERMP1_b	TGAGTCGGCTGCTGTGAGG	SE associated gene
ERMP1	ERMP1_c	CTGTGAGGCGGCACCGCGT	SE associated gene
ERMP1	ERMP1_d	TCGACGCTCTACTCCGACG	SE associated gene
ERMP1	ERMP1_e	TCGGAGTAGAGCGTCGAGA	SE associated gene
ERMP1	ERMP1_f	GTAGAGCGTCGAGAGGGAG	SE associated gene
ERMP1	ERMP1_g	GAGCGTCGAGAGGGAGCGG	SE associated gene
ERMP1	ERMP1_h	TCCCTCTCCGGCGGTGGCG	SE associated gene
ESRP1	ESRP1_a	ACGGCCTCTCCGGATTACT	SE associated gene
ESRP1	ESRP1_b	GCCTCTCCGGATTACTTGG	SE associated gene
ESRP1	ESRP1_c	ACCACCAAGTAATCCGGAG	SE associated gene
ESRP1	ESRP1_d	AAAGCACCACCAAGTAATC	SE associated gene
ESRP1	ESRP1_e	TCCGAGCCTAGCTTGGCCC	SE associated gene
ESRP1	ESRP1_f	AAGCTAGGCTCGGATGAGA	SE associated gene
ESRP1	ESRP1_g	TTCTCATCCGAGCCTAGCT	SE associated gene
ESRP1	ESRP1_h	CTGCTGTTCTGGAAAGTCG	SE associated gene
EZH1	EZH1_a	GTGATACATTTGGAGGTAG	epi genes
EZH1	EZH1_b	CTCCAAATGTATCACTTAC	epi genes
EZH1	EZH1_c	GCGACTTCGACAACTTAAA	epi genes
EZH1	EZH1_d	CGACAACTTAAACGGCTTC	epi genes
EZH1	EZH1_e	AAACGGCTTCAGGCAAATA	epi genes
EZH1	EZH1_f	CCAGATCCTCAATGAAGAA	epi genes
EZH1	EZH1_g	CCATTCTTCATTGAGGATC	epi genes
EZH1	EZH1_h	CTTCTTCCATTCTTCATTG	epi genes
EZH2	EZH2_a	CTGGGAAGAAATCTGAGAA	epi genes
EZH2	EZH2_b	GAAGGGACCAGTTTGTTGG	epi genes
EZH2	EZH2_c	CACGCTTCCGCCAACAAAC	epi genes
EZH2	EZH2_d	GCGACTGAGACAGCTCAAG	epi genes
EZH2	EZH2_e	GGAAATCTTAAACCAAGAA	epi genes
EZH2	EZH2_f	CCAAGAATGGAAACAGCGA	epi genes
EZH2	EZH2_g	CCTTCGCTGTTTCCATTCT	epi genes
EZH2	EZH2_h	TACATAACATTCCTTATAT	epi genes
FAF1	FAF1_a	ATCATCTCCCGGTCCATGT	SE associated gene
FAF1	FAF1_b	ATGGACCGGGAGATGATCC	SE associated gene
FAF1	FAF1_c	GACCGGGAGATGATCCTGG	SE associated gene
FAF1	FAF1_d	ATCCGCCAGGATCATCTCC	SE associated gene
FAF1	FAF1_e	ATCAATGGTGTAATACCAC	SE associated gene
FAF1	FAF1_f	ATGGAGGTGAGACCATACC	SE associated gene
FAF1	FAF1_g	TTAAATGCAGGTCCTGGTA	SE associated gene
FAF1	FAF1_h	CTGGATTAAATGCAGGTCC	SE associated gene
FAIM2	FAIM2_a	GTGCATGGCGAGAAGAAGG	SE associated gene
FAIM2	FAIM2_b	GCTTCCTCATAGGAGGGTG	SE associated gene
FAIM2	FAIM2_c	AGGTGGCTTCCTCATAGGA	SE associated gene
FAIM2	FAIM2_d	CCTATGAGGAAGCCACCTC	SE associated gene
FAIM2	FAIM2_e	GAGGTGGCTTCCTCATAGG	SE associated gene
FAIM2	FAIM2_f	CTATGAGGAAGCCACCTCT	SE associated gene
FAIM2	FAIM2_g	CCAGAGGTGGCTTCCTCAT	SE associated gene
FAIM2	FAIM2_h	GTGGAGAGGCACCGCTGTG	SE associated gene
FAM117A	FAM117A_a	GGCAGAGGCGGAGGTGCCT	SE associated gene
FAM117A	FAM117A_b	GGCTGGGCTGCAGCCGCTC	SE associated gene
FAM117A	FAM117A_c	GAGCGGCTGCAGCCCAGCC	SE associated gene
FAM117A	FAM117A_d	GCTGGGCTGCAGCCGCTCA	SE associated gene
FAM117A	FAM117A_e	TGCGGCTGCTGCAGCTGGA	SE associated gene
FAM117A	FAM117A_f	CAGCAGCCGCACCAGCGCC	SE associated gene
FAM117A	FAM117A_g	AGCCGCACCAGCGCCGGGA	SE associated gene
FAM117A	FAM117A_h	GCCACCGAGCATGGGACGC	SE associated gene
FAM132B	FAM132B_a	AGCAGCAGGCGGGCTCCGG	SE associated gene
FAM132B	FAM132B_b	ACGAGCAGCAGGCGGGCTC	SE associated gene
FAM132B	FAM132B_c	GCCTGCTGCTCGTCTACGC	SE associated gene
FAM132B	FAM132B_d	GCGTAGACGAGCAGCAGGC	SE associated gene
FAM132B	FAM132B_e	GCCCGCGTAGACGAGCAGC	SE associated gene
FAM132B	FAM132B_f	CTCGTCTACGCGGGCCTGC	SE associated gene
FAM132B	FAM132B_g	TGCGGGCGCGGCTCCTCGA	SE associated gene
FAM132B	FAM132B_h	TCGAGGAGCCGCGCCCGCA	SE associated gene
FAM174B	FAM174B_a	CGCGAGCAGCAGCAGCGGC	SE associated gene
FAM174B	FAM174B_b	GGAGCGCGAGCAGCAGCAG	SE associated gene
FAM174B	FAM174B_c	CTGCTGCTGCTCGCGCTCC	SE associated gene
FAM174B	FAM174B_d	TCGGCTCTGCTGGCGCGGG	SE associated gene
FAM174B	FAM174B_e	GGACTCGGCTCTGCTGGCG	SE associated gene
FAM174B	FAM174B_f	GAGACGGACTCGGCTCTGC	SE associated gene
FAM174B	FAM174B_g	CGAGTCCGTCTCCGCGCCG	SE associated gene
FAM174B	FAM174B_h	CACGGCGCGGAGACGGACT	SE associated gene
FAM198A	FAM198A_a	GGCTCCGGAGAAAGCTGCG	SE associated gene
FAM198A	FAM198A_b	GAGAAAGCTGCGTGGCAAG	SE associated gene
FAM198A	FAM198A_c	CTTGCCACGCAGCTTTCTC	SE associated gene
FAM198A	FAM198A_d	AGAGGCAGAACGCTATCAC	SE associated gene
FAM198A	FAM198A_e	CGCAGATAGGATCATCAAG	SE associated gene
FAM198A	FAM198A_f	TTGATGATCCTATCTGCGA	SE associated gene
FAM198A	FAM198A_g	GGTGACAGCCATCGCAGAT	SE associated gene
FAM198A	FAM198A_h	GCCGGCGGATGGACGCTGT	SE associated gene
LRRC75B	LRRC75B_a	TCAGAGCCAGCCTCGGGCC	SE associated gene
LRRC75B	LRRC75B_b	CGAGGCTGGCTCTGAGGCC	SE associated gene
LRRC75B	LRRC75B_c	CCGGCCTCAGAGCCAGCCT	SE associated gene
LRRC75B	LRRC75B_d	ACCCGGCGCTCGTAGGGCG	SE associated gene
LRRC75B	LRRC75B_e	GCCCTACGAGCGCCGGGTG	SE associated gene
LRRC75B	LRRC75B_f	CTACGAGCGCCGGGTGCGG	SE associated gene
LRRC75B	LRRC75B_g	ACCGCACCCGGCGCTCGTA	SE associated gene
LRRC75B	LRRC75B_h	CTCGCGGAGCCACCGCACC	SE associated gene
FAM217B	FAM217B_a	GTTCTCTGCGTTCAGAAGC	SE associated gene
FAM217B	FAM217B_b	CCCGAGTGGGAGGACTTCT	SE associated gene
FAM217B	FAM217B_c	CAAGAAGTCCTCCCACTCG	SE associated gene
FAM217B	FAM217B_d	TAGACTTATTCAGCTTGAG	SE associated gene
FAM217B	FAM217B_e	CAATTAGCTTACTTCTCCC	SE associated gene
FAM217B	FAM217B_f	TCCAAGCCACTACCTCACC	SE associated gene
FAM217B	FAM217B_g	TCCTGGTGAGGTAGTGGCT	SE associated gene
FAM217B	FAM217B_h	CCACTACCTCACCAGGAAG	SE associated gene
FAM46A	FAM46A_a	GCCATGTCTGAGGACGAGC	SE associated gene
FAM46A	FAM46A_b	GCCAGCTCGTCCTCAGACA	SE associated gene
FAM46A	FAM46A_c	CCCTAGGCGGCGACTTCGG	SE associated gene
FAM46A	FAM46A_d	CGCCGAAGTCGCCGCCTAG	SE associated gene
FAM46A	FAM46A_e	TAGGCGGCGACTTCGGCGG	SE associated gene
FAM46A	FAM46A_f	GCCGCCGAAGTCGCCGCCT	SE associated gene
FAM46A	FAM46A_g	GCGGCGACTTCGGCGGTGG	SE associated gene
FAM46A	FAM46A_h	CGGTGGCGGCAGCTTCGGT	SE associated gene
FAM47E	FAM47E_a	GGAAGTGCTTGATCCTGAC	SE associated gene
FAM47E	FAM47E_b	CTTGATCCTGACCGGAAGC	SE associated gene
FAM47E	FAM47E_c	GATCCTGACCGGAAGCTGG	SE associated gene
FAM47E	FAM47E_d	TGTCCTCCAGCTTCCGGTC	SE associated gene
FAM47E	FAM47E_e	CGGAAGCTGGAGGACACAT	SE associated gene
FAM47E	FAM47E_f	GACACATGGGCTTATTGTC	SE associated gene
FAM47E	FAM47E_g	GGCTTATTGTCAGGACACC	SE associated gene
FAM47E	FAM47E_h	ATTGTCAGGACACCAGGAA	SE associated gene
FBLN2	FBLN2_a	GCAGGAGCCTGGCTTGCTC	SE associated gene
FBLN2	FBLN2_b	GAGCAAGCCAGGCTCCTGC	SE associated gene
FBLN2	FBLN2_c	CAGGAGCCTGGCTTGCTCT	SE associated gene
FBLN2	FBLN2_d	GCCTGGCTTGCTCTGGGCC	SE associated gene
FBLN2	FBLN2_e	GCCAGGCCCAGAGCAAGCC	SE associated gene
FBLN2	FBLN2_f	GGCAGCTGCGGCCACGCTG	SE associated gene
FBLN2	FBLN2_g	GCCCGTGCAGTCCTGCCGA	SE associated gene
FBLN2	FBLN2_h	CGGCAGGACTGCACGGGCG	SE associated gene
FBXO28	FBXO28_a	GCAGCGGCGGAGGAGCGGA	SE associated gene
FBXO28	FBXO28_b	GCGGAGGAGCGGATGGCAG	SE associated gene
FBXO28	FBXO28_c	AGGAGCGGATGGCAGAGGA	SE associated gene
FBXO28	FBXO28_d	AGCGGATGGCAGAGGAAGG	SE associated gene
FBXO28	FBXO28_e	GAGGCGGCGGCCAAGGCGA	SE associated gene
FBXO28	FBXO28_f	AGAGGAACCGCCGTCGCCT	SE associated gene
FBXO28	FBXO28_g	GCGGTTCCTCTTTGGCCTC	SE associated gene
FBXO28	FBXO28_h	GTAGAGCCGGAGGCCAAAG	SE associated gene
FIBCD1	FIBCD1_a	AACGACCGGTGGAAGACCA	SE associated gene
FIBCD1	FIBCD1_b	ACCGGTGGAAGACCATGGG	SE associated gene
FIBCD1	FIBCD1_c	GCCGCCCATGGTCTTCCAC	SE associated gene
FIBCD1	FIBCD1_d	AGTTGGGCAGCGCCGCCCA	SE associated gene
FIBCD1	FIBCD1_e	GGCGGCGCTGCCCAACTTG	SE associated gene
FIBCD1	FIBCD1_f	CGCTGCCCAACTTGAGGAC	SE associated gene
FIBCD1	FIBCD1_g	GCGCGGCCGGTCCTCAAGT	SE associated gene
FIBCD1	FIBCD1_h	ACAGCACGTAGCCGCAGCT	SE associated gene
FOXA1	FOXA1_a	AGGGCATGAAACCAGCGAC	SE associated gene
FOXA1	FOXA1_b	TAGTAGCTGTTCCAGTCGC	SE associated gene
FOXA1	FOXA1_c	AGCTACTACGCAGACACGC	SE associated gene
FOXA1	FOXA1_d	CTGACCGGGACGGAGGAGT	SE associated gene
FOXA1	FOXA1_e	ATGTTGCTGACCGGGACGG	SE associated gene
FOXA1	FOXA1_f	TTCATGTTGCTGACCGGGA	SE associated gene
FOXA1	FOXA1_g	CGGTCAGCAACATGAACTC	SE associated gene
FOXA1	FOXA1_h	TGAGTTCATGTTGCTGACC	SE associated gene
FOXI1	FOXI1_a	ATAGTAGAGGTTCATCTCG	SE associated gene
FOXI1	FOXI1_b	GAAGAAGTTCTCATAGTAG	SE associated gene
FOXI1	FOXI1_c	GAGAACTTCTTCCACCCAC	SE associated gene
FOXI1	FOXI1_d	GCTGGGCACGCCCTGTGGG	SE associated gene
FOXI1	FOXI1_e	AGGGCTGGGCACGCCCTGT	SE associated gene
FOXI1	FOXI1_f	AAGGAGGGCCGCTGAGGGC	SE associated gene
FOXI1	FOXI1_g	CTCAGCGGCCCTCCTTCGA	SE associated gene
FOXI1	FOXI1_h	CTCGAAGGAGGGCCGCTGA	SE associated gene
FOXJ1	FOXJ1_a	GAGAGCTGGCTGCGCCTCT	SE associated gene
FOXJ1	FOXJ1_b	GGCTGCGCCTCTCGGGAGC	SE associated gene
FOXJ1	FOXJ1_c	CAGGGCGTCGGGCTCCTCC	SE associated gene
FOXJ1	FOXJ1_d	AGGCTGTCATCCAGGGCGT	SE associated gene
FOXJ1	FOXJ1_e	GCTGGTCAGGCTGTCATCC	SE associated gene
FOXJ1	FOXJ1_f	CAGCCTGACCAGCCTGCAG	SE associated gene
FOXJ1	FOXJ1_g	CAGCCACTGCAGGCTGGTC	SE associated gene
FOXJ1	FOXJ1_h	TCCTGCAGCCACTGCAGGC	SE associated gene
FOXP4	FOXP4_a	ATCTGCCTCGGAGACAATC	SE associated gene
FOXP4	FOXP4_b	GCCTCGGAGACAATCAGGT	SE associated gene
FOXP4	FOXP4_c	GCCGACCTGATTGTCTCCG	SE associated gene
FOXP4	FOXP4_d	CAATCAGGTCGGCTCCATC	SE associated gene
FOXP4	FOXP4_e	CGGCTCCATCTGGTCAGAA	SE associated gene
FOXP4	FOXP4_f	CATCTGGTCAGAATGGCGT	SE associated gene
FOXP4	FOXP4_g	CCACGCCATTCTGACCAGA	SE associated gene
FOXP4	FOXP4_h	ATGGCGTGGGCAGCCTCTC	SE associated gene
FOXS1	FOXS1_a	TGCAGCAGCAGCCTCTGCC	SE associated gene
FOXS1	FOXS1_b	AGCAGCCTCTGCCCGGGCC	SE associated gene
FOXS1	FOXS1_c	GGCTTGGTTGGCTCAGTTG	SE associated gene
FOXS1	FOXS1_d	AGCTGTAGGGAGGCTTGGT	SE associated gene
FOXS1	FOXS1_e	ATGTAGCTGTAGGGAGGCT	SE associated gene
FOXS1	FOXS1_f	TAAGGGCGATGTAGCTGTA	SE associated gene
FOXS1	FOXS1_g	TACATCGCCCTTATTGCTA	SE associated gene
FOXS1	FOXS1_h	CTGGATGGCCATAGCAATA	SE associated gene
FUT8	FUT8_a	ACTACCTCAGTCAGACAGA	SE associated gene
FUT8	FUT8_b	TCAGTCAGACAGATGGAGC	SE associated gene
FUT8	FUT8_c	TGCTCCATCTGTCTGACTG	SE associated gene
FUT8	FUT8_d	GACAGATGGAGCAGGTGAT	SE associated gene
FUT8	FUT8_e	GATGGAGCAGGTGATTGGC	SE associated gene
FUT8	FUT8_f	GCCAAAGATCTGACAGAAC	SE associated gene
FUT8	FUT8_g	TCTGACAGAACTGGTTCAG	SE associated gene
FUT8	FUT8_h	TTGGCTTTGCTGCAGTCCT	SE associated gene
GABRP	GABRP_a	ACACACGAAGGCCAAGTGG	SE associated gene
GABRP	GABRP_b	CAGACACACGAAGGCCAAG	SE associated gene
GABRP	GABRP_c	AAGAGACTCAGACACACGA	SE associated gene
GABRP	GABRP_d	GTCAGTTCAACGTCGAGGT	SE associated gene
GABRP	GABRP_e	GTGACAAGCTTTCCCTGCC	SE associated gene
GABRP	GABRP_f	GAGGTTCTCAAAGCCAGGC	SE associated gene
GABRP	GABRP_g	CTGTGAGGTTCTCAAAGCC	SE associated gene
GABRP	GABRP_h	GCTTTGAGAACCTCACAGC	SE associated gene
GADD45G	GADD45G_a	TGACTCTGGAAGAAGTCCG	SE associated gene
GADD45G	GADD45G_b	CTGGAAGAAGTCCGCGGCC	SE associated gene
GADD45G	GADD45G_c	CGCGGCCAGGACACAGTTC	SE associated gene
GADD45G	GADD45G_d	CGGAACTGTGTCCTGGCCG	SE associated gene
GADD45G	GADD45G_e	GCTTTCCGGAACTGTGTCC	SE associated gene
GADD45G	GADD45G_f	CTGCATGAGTTGCTGCTGT	SE associated gene
GADD45G	GADD45G_g	TGCTGTCGGCGCAGCGTCA	SE associated gene
GADD45G	GADD45G_h	GTCAGGGCTGCCTCACTGC	SE associated gene
GAL3ST2	GAL3ST2_a	AGTCAGGGCCAGGAGGAGG	SE associated gene
GAL3ST2	GAL3ST2_b	CAGGAGCAGAGTCAGGGCC	SE associated gene
GAL3ST2	GAL3ST2_c	GCCCTGACTCTGCTCCTGC	SE associated gene
GAL3ST2	GAL3ST2_d	GCCAGCAGGAGCAGAGTCA	SE associated gene
GAL3ST2	GAL3ST2_e	GTGCAGGAATCCGGCCAGC	SE associated gene
GAL3ST2	GAL3ST2_f	CTGGCCGGATTCCTGCACT	SE associated gene
GAL3ST2	GAL3ST2_g	AAGTCCGAGTGCAGGAATC	SE associated gene
GAL3ST2	GAL3ST2_h	CTGCACTCGGACTTAGAGC	SE associated gene
GALNT12	GALNT12_a	GCGCTGCCCGCGGGAACTG	SE associated gene
GALNT12	GALNT12_b	GAGGCGCTGTTGGTGCTCC	SE associated gene
GALNT12	GALNT12_c	TTGGTGCTCCTGGCGCTAC	SE associated gene
GALNT12	GALNT12_d	CTCCTGGCGCTACTGGCGT	SE associated gene
GALNT12	GALNT12_e	TGGCGCTACTGGCGTTGGC	SE associated gene
GALNT12	GALNT12_f	GGCCAACGCCAGTAGCGCC	SE associated gene
GALNT12	GALNT12_g	GGCGCTACTGGCGTTGGCC	SE associated gene
GALNT12	GALNT12_h	CTACTGGCGTTGGCCGGGC	SE associated gene
GALNT6	GALNT6_a	CCCTGCGCCTGGCCATGGT	SE associated gene
GALNT6	GALNT6_b	CCCACCATGGCCAGGCGCA	SE associated gene
GALNT6	GALNT6_c	GGCGCAGCCCACCATGGCC	SE associated gene
GALNT6	GALNT6_d	ACAAAGGCGCAGCCCACCA	SE associated gene
GALNT6	GALNT6_e	TTCCTCTTCCTCCTGCATA	SE associated gene
GALNT6	GALNT6_f	ATCCCTATGCAGGAGGAAG	SE associated gene
GALNT6	GALNT6_g	GCTCACATCCCTATGCAGG	SE associated gene
GALNT6	GALNT6_h	GCTGCTCACATCCCTATGC	SE associated gene
GATA2	GATA2_a	CCCGAGCAGCCGCGCTGGA	SE associated gene
GATA2	GATA2_b	GCCATCCAGCGCGGCTGCT	SE associated gene
GATA2	GATA2_c	CCGCGCTGGATGGCGCACC	SE associated gene
GATA2	GATA2_d	CCGGGTGCGCCATCCAGCG	SE associated gene
GATA2	GATA2_e	GCTGCGCATTCAGCACGGC	SE associated gene
GATA2	GATA2_f	GCCCGGGTGGTGTGAGTCG	SE associated gene
GATA2	GATA2_g	GACTCACACCACCCGGGCC	SE associated gene
GATA2	GATA2_h	AGGCCCGGGTGGTGTGAGT	SE associated gene
KAT2A	KAT2A_a	GGTGCAGGAGTCGGAGTTG	epi genes
KAT2A	KAT2A_b	TGGGTGCAGGAGTCGGAGT	epi genes
KAT2A	KAT2A_c	CCGACTCCTGCACCCAGCC	epi genes
KAT2A	KAT2A_d	CCGGGCTGGGTGCAGGAGT	epi genes
KAT2A	KAT2A_e	CTGAAGCCGGGCTGGGTGC	epi genes
KAT2A	KAT2A_f	CCGATTCCGACTCCCACCC	epi genes
KAT2A	KAT2A_g	GTCCCTGTGCTGCCGGCTG	epi genes
KAT2A	KAT2A_h	CAGCCGGCAGCACAGGGAC	epi genes
KAT5	KAT5_a	CTGCCGCCTACCCGTGCTG	epi genes
KAT5	KAT5_b	CCGCCTACCCGTGCTGCGG	epi genes
KAT5	KAT5_c	CCGCCGCAGCACGGGTAGG	epi genes
KAT5	KAT5_d	GTTCCGCCGCAGCACGGGT	epi genes
KAT5	KAT5_e	CCCGTGCTGCGGCGGAACC	epi genes
KAT5	KAT5_f	TCCTGGTTCCGCCGCAGCA	epi genes
KAT5	KAT5_g	CCAGGACAACGAAGATGAG	epi genes
KAT5	KAT5_h	CCACTCATCTTCGTTGTCC	epi genes
KAT6A	KAT6A_a	AATCCACTCAGTATAAAGC	epi genes
KAT6A	KAT6A_b	ACAGCGTCCTTCAGAAGAA	epi genes
KAT6A	KAT6A_c	TGCATATCCTTTCTTCTGA	epi genes
KAT6A	KAT6A_d	GTGTCTTCATCCCATGGCT	epi genes
KAT6A	KAT6A_e	TGGAGTTGAGTGTTAAAGA	epi genes
KAT6A	KAT6A_f	ATAAAGATCCTGATAATCC	epi genes
KAT6A	KAT6A_g	CTATTCGCCCAGGATTATC	epi genes
KAT6A	KAT6A_h	TAGGAAGTGCTATTCGCCC	epi genes
GDPD5	GDPD5_a	CTGTGGCTCGTAGTACTGC	SE associated gene
GDPD5	GDPD5_b	GGCAGGAGAGGCACAGCTG	SE associated gene
GDPD5	GDPD5_c	CTGTGCCTCTCCTGCCTCA	SE associated gene
GDPD5	GDPD5_d	GATGCCCGTGAGGCAGGAG	SE associated gene
GDPD5	GDPD5_e	CCTGCCTCACGGGCATCTA	SE associated gene
GDPD5	GDPD5_f	CCGTAGATGCCCGTGAGGC	SE associated gene
GDPD5	GDPD5_g	GCAGCCGTAGATGCCCGTG	SE associated gene
GDPD5	GDPD5_h	GCGCTGGTAGCGCTTCCAA	SE associated gene
GFOD1	GFOD1_a	CCAAGCTCATGAGCATCAT	SE associated gene
GFOD1	GFOD1_b	CATGATGCTCATGAGCTTG	SE associated gene
GFOD1	GFOD1_c	CCCATGATGCTCATGAGCT	SE associated gene
GFOD1	GFOD1_d	AACGTGCTGCGCTTCCTGC	SE associated gene
GFOD1	GFOD1_e	CATGCGCACGAAAGCCGGC	SE associated gene
GFOD1	GFOD1_f	GCTTCATGCGCACGAAAGC	SE associated gene
GFOD1	GFOD1_g	CGCATGAAGCAGCTGATCG	SE associated gene
GFOD1	GFOD1_h	TGAAGCAGCTGATCGAGGA	SE associated gene
GGT1	GGT1_a	CCAAGCAGTGCTCGAAGAT	SE associated gene
GGT1	GGT1_b	CCAATCTTCGAGCACTGCT	SE associated gene
GGT1	GGT1_c	CCCACAGCATGGGCATCGG	SE associated gene
GGT1	GGT1_d	GAGGTCATCAACGCCCGCG	SE associated gene
GGT1	GGT1_e	GTCATCAACGCCCGCGAGG	SE associated gene
GGT1	GGT1_f	CTGTTGAACATGGTGGCAA	SE associated gene
GGT1	GGT1_g	GCCACCATGTTCAACAGCT	SE associated gene
GGT1	GGT1_h	TCCGAGCTGTTGAACATGG	SE associated gene
GGT6	GGT6_a	GAGCGGGCAGAAGAGCCCG	SE associated gene
GGT6	GGT6_b	GCAGCTTCTGATAGACCAC	SE associated gene
GGT6	GGT6_c	CTATCAGAAGCTGCTGCCC	SE associated gene
GGT6	GGT6_d	CTGCCCTGGGAGCCAAGCT	SE associated gene
GGT6	GGT6_e	ACTCCAAGCTTGGCTCCCA	SE associated gene
GGT6	GGT6_f	TGGGAGCCAAGCTTGGAGT	SE associated gene
GGT6	GGT6_g	GACTCCAAGCTTGGCTCCC	SE associated gene
GGT6	GGT6_h	GAGCCAAGCTTGGAGTCGG	SE associated gene
GJC3	GJC3_a	GTGTGGCAGGTTCCTGCGG	SE associated gene
GJC3	GJC3_b	AGGTTCCTGCGGCGGCTGC	SE associated gene
GJC3	GJC3_c	TTCCTGCGGCGGCTGCTGG	SE associated gene
GJC3	GJC3_d	TCTTGCTTCCCGTGCTCCT	SE associated gene
GJC3	GJC3_e	GCTCATCACCATAGACTCC	SE associated gene
GJC3	GJC3_f	TACCCAGCGCCCTCTATAT	SE associated gene
GJC3	GJC3_g	AAACCCATATAGAGGGCGC	SE associated gene
GJC3	GJC3_h	AGAGTGAAACCCATATAGA	SE associated gene
GLYATL1	GLYATL1_a	CTGTGTATCACATCAATCA	SE associated gene
GLYATL1	GLYATL1_b	GGAGGTGCTGGTGGATTCC	SE associated gene
GLYATL1	GLYATL1_c	ACCATCTGATATTCAGGCC	SE associated gene
GLYATL1	GLYATL1_d	TAATAACCATCTGATATTC	SE associated gene
GLYATL1	GLYATL1_e	ATATCAGATGGTTATTATC	SE associated gene
GLYATL1	GLYATL1_f	AAATTGTGAGATCGTAAAC	SE associated gene
GLYATL1	GLYATL1_g	CATTCGAGAGCACTCCTCT	SE associated gene
GLYATL1	GLYATL1_h	AGAGCACTCCTCTTGGTTA	SE associated gene
GOLGA5	GOLGA5_a	TTTGTTGATCTTGCTGGAA	SE associated gene
GOLGA5	GOLGA5_b	TTTAAACCGAGTTGATCAA	SE associated gene
GOLGA5	GOLGA5_c	CAGATTTGATATATCAGAC	SE associated gene
GOLGA5	GOLGA5_d	AAATGTGAAAGTAGGATCT	SE associated gene
GOLGA5	GOLGA5_e	GGATCTCGGACACCAGTAG	SE associated gene
GOLGA5	GOLGA5_f	CAGGATGAGAGGCCTCTAC	SE associated gene
GOLGA5	GOLGA5_g	CAAACAGCAGCTCATCATC	SE associated gene
GOLGA5	GOLGA5_h	TTCACAGAAGGAGCCTACC	SE associated gene
GOLPH3	GOLPH3_a	CGCTGACCCAGCGCAGCTC	SE associated gene
GOLPH3	GOLPH3_b	GAGCTGCGCTGGGTCAGCG	SE associated gene
GOLPH3	GOLPH3_c	ACCCAGCGCAGCTCCGGCC	SE associated gene
GOLPH3	GOLPH3_d	CACCAGGCCGGAGCTGCGC	SE associated gene
GOLPH3	GOLPH3_e	GTGCGCCGCTGCACCAGGC	SE associated gene
GOLPH3	GOLPH3_f	CTGGTGCAGCGGCGCACCG	SE associated gene
GOLPH3	GOLPH3_g	CTCGGTGCGCCGCTGCACC	SE associated gene
GOLPH3	GOLPH3_h	GCGGCGTTGCGGGAGGCCT	SE associated gene
GOLT1A	GOLT1A_a	ATGAAGAAGATGCCGAAAC	SE associated gene
GOLT1A	GOLT1A_b	GTACAGGAGTGTTCCAAAG	SE associated gene
GOLT1A	GOLT1A_c	GAGCACGGAATCAAAGTAC	SE associated gene
GOLT1A	GOLT1A_d	TACTTTGATTCCGTGCTCC	SE associated gene
GOLT1A	GOLT1A_e	TTTCCAAAGGCCAGGAGCA	SE associated gene
GOLT1A	GOLT1A_f	GATGAGGGACAGGCCCGTC	SE associated gene
GOLT1A	GOLT1A_g	CGGGCCTGTCCCTCATCAT	SE associated gene
GOLT1A	GOLT1A_h	GTCCCTCATCATTGGCCTG	SE associated gene
GPR124	GPR124_a	AGCGGCAGCAGCAGGCGCG	SE associated gene
GPR124	GPR124_b	CCGTGGCTCCTGCTGCTCC	SE associated gene
GPR124	GPR124_c	CTGCTGCTCCTGGCGCCCG	SE associated gene
GPR124	GPR124_d	CTCGGGCGCCAGGAGCAGC	SE associated gene
GPR124	GPR124_e	TCCTGGCGCCCGAGGCTCG	SE associated gene
GPR124	GPR124_f	CGGATGGATAGCGGGCAGC	SE associated gene
GPR124	GPR124_g	GCAGCTGCGGATGGATAGC	SE associated gene
GPR124	GPR124_h	ATCCGCAGCTGCAAGTGCT	SE associated gene
GPR19	GPR19_a	GTGTAGGAATAATCAAATG	SE associated gene
GPR19	GPR19_b	TTGATTATTCCTACACTTC	SE associated gene
GPR19	GPR19_c	GGCTGTTTCAGTGCAGCTG	SE associated gene
GPR19	GPR19_d	TATTGGCTTGGCAGAGGTG	SE associated gene
GPR19	GPR19_e	CTGCCAAGCCAATACCTGA	SE associated gene
GPR19	GPR19_f	TCAGGTATTGGCTTGGCAG	SE associated gene
GPR19	GPR19_g	ATTCCATCAGGTATTGGCT	SE associated gene
GPR19	GPR19_h	ACTTAATTCCATCAGGTAT	SE associated gene
GPRC5C	GPRC5C_a	ACCCAACCAGAGCCTGGCC	SE associated gene
GPRC5C	GPRC5C_b	TCCCAGGCCAGGCTCTGGT	SE associated gene
GPRC5C	GPRC5C_c	AGAGCCTGGCCTGGGAGCC	SE associated gene
GPRC5C	GPRC5C_d	TGGCTCCCAGGCCAGGCTC	SE associated gene
GPRC5C	GPRC5C_e	GATGGCCATCCTGGCTCCC	SE associated gene
GPRC5C	GPRC5C_f	ATGGCCATCCACAAAGCCT	SE associated gene
GPRC5C	GPRC5C_g	ATCACCAAGGCTTTGTGGA	SE associated gene
GPRC5C	GPRC5C_h	AAGCCTTGGTGATGTGCCT	SE associated gene
GPRIN2	GPRIN2_a	GGTGCCCAGGGACCCGGCT	SE associated gene
GPRIN2	GPRIN2_b	GCTGGAAGAGCTCTGGGAC	SE associated gene
GPRIN2	GPRIN2_c	AGAGCTCTTCCAGCCTGCT	SE associated gene
GPRIN2	GPRIN2_d	AGCAGGCTGGAAGAGCTCT	SE associated gene
GPRIN2	GPRIN2_e	CAGCCTGCTGGGTGAAGGC	SE associated gene
GPRIN2	GPRIN2_f	CGGCCTTCACCCAGCAGGC	SE associated gene
GPRIN2	GPRIN2_g	TTCCCGGCCTTCACCCAGC	SE associated gene
GPRIN2	GPRIN2_h	TGGCAGTCTTGCGGAGCTC	SE associated gene
GRHL1	GRHL1_a	CATTCTGAAGAACCAACAC	SE associated gene
GRHL1	GRHL1_b	AGCACTTTATCCACAGCGG	SE associated gene
GRHL1	GRHL1_c	TAGTGTAGGACCGCCGCTG	SE associated gene
GRHL1	GRHL1_d	CGGCGGTCCTACACTAGTG	SE associated gene
GRHL1	GRHL1_e	GAGGCCTGGAAATCCTTCC	SE associated gene
GRHL1	GRHL1_f	CTTTGGTCGCTGCAGTGAG	SE associated gene
GRHL1	GRHL1_g	AAGCGATGATGAGCATCAA	SE associated gene
GRHL1	GRHL1_h	AAGACAGCGCCGCTGCGCT	SE associated gene
GRTP1	GRTP1_a	CGACCCGTACGGATTCGAG	SE associated gene
GRTP1	GRTP1_b	AGGCCGCTCGAATCCGTAC	SE associated gene
GRTP1	GRTP1_c	TACGGATTCGAGCGGCCTG	SE associated gene
GRTP1	GRTP1_d	CGGCGTCGTCGAAGTCCTC	SE associated gene
GRTP1	GRTP1_e	GTGAGCGTGACCAGGTAGC	SE associated gene
GRTP1	GRTP1_f	CTGGTCACGCTCACCCGCA	SE associated gene
GRTP1	GRTP1_g	CCTGCGGGTGAGCGTGACC	SE associated gene
GRTP1	GRTP1_h	CACCCGCAGGGCGATCAAA	SE associated gene
GSTM4	GSTM4_a	CGGGCAATGTAGCACAGGA	SE associated gene
GSTM4	GSTM4_b	ATTGGAGACGTCCATAGCC	SE associated gene
GSTM4	GSTM4_c	ATGGACGTCTCCAATCAGC	SE associated gene
GSTM4	GSTM4_d	CAGACTCTGGCCAGCTGAT	SE associated gene
GSTM4	GSTM4_e	TCAGGGCTGTAGCAGACTC	SE associated gene
GSTM4	GSTM4_f	AAACTGAAGCCAGAATACT	SE associated gene
GSTM4	GSTM4_g	GAAGTTCCTCCAAGTATTC	SE associated gene
GSTM4	GSTM4_h	AGAAGTGCTGCATCATTGT	SE associated gene
H3F3B	H3F3B_a	AGACTGCTCGTAAGTCCAC	SE associated gene
H3F3B	H3F3B_b	TGCTCGTAAGTCCACCGGT	SE associated gene
H3F3B	H3F3B_c	GCTGGCCACGAAAGCCGCC	SE associated gene
H3F3B	H3F3B_d	AAAGCGCTCCCTCTACCGG	SE associated gene
H3F3B	H3F3B_e	GGTTTCAGAGCGCAGCCAT	SE associated gene
HDAC1	HDAC1_a	GGCGCAGACGCAGGGCACC	epi genes
HDAC1	HDAC1_b	GCAGACGCAGGGCACCCGG	epi genes
HDAC1	HDAC1_c	GTAGTAACAGACTTTCCTC	epi genes
HDAC1	HDAC1_d	GAAATTACTATTATGGACA	epi genes
HDAC1	HDAC1_e	TCGGTGAGGCTTCATTGGG	epi genes
HDAC1	HDAC1_f	GGATTCGGTGAGGCTTCAT	epi genes
HDAC1	HDAC1_g	GAGTCATGCGGATTCGGTG	epi genes
HDAC1	HDAC1_h	CAGCAAATTATGAGTCATG	epi genes
HDAC11	HDAC11_a	AAAGGGATGCAGCTTCTCC	SE associated gene
HDAC11	HDAC11_b	AGCTGCATCCCTTTGATGC	SE associated gene
HDAC11	HDAC11_c	CTTCTGTCTGACAGCATGC	SE associated gene
HDAC11	HDAC11_d	CTGTCTGACAGCATGCTGG	SE associated gene
HDAC11	HDAC11_e	TCTGACAGCATGCTGGTGG	SE associated gene
HDAC11	HDAC11_f	AGCATGCTGGTGGAGGCGC	SE associated gene
HDAC11	HDAC11_g	ATGCTGGTGGAGGCGCGGG	SE associated gene
HDAC11	HDAC11_h	GTGGAGGCGCGGGAGGCCT	SE associated gene
HDAC2	HDAC2_a	TGGCGTACAGTCAAGGAGG	epi genes
HDAC2	HDAC2_b	GGAAATTATTATTATGGAC	epi genes
HDAC2	HDAC2_c	CGGATTCTATGAGGCTTCA	epi genes
HDAC2	HDAC2_d	TAATTTAACAGCAAGTTAT	epi genes
HDAC2	HDAC2_e	ATAACTTGCTGTTAAATTA	epi genes
HDAC2	HDAC2_f	ATAATTTAACAGCAAGTTA	epi genes
HDAC2	HDAC2_g	CTTCGGCAGTGGCTTTATG	epi genes
HDAC2	HDAC2_h	TTTGTCATTTCTTCGGCAG	epi genes
HDAC3	HDAC3_a	TAGAAATAGGCCACGGTCT	epi genes
HDAC3	HDAC3_b	GTGGAAGTTGCCCACGTCG	epi genes
HDAC3	HDAC3_c	TGGGTCAATGCCAGGCGAT	epi genes
HDAC3	HDAC3_d	CTGGCATTGACCCATAGCC	epi genes
HDAC3	HDAC3_e	CAGGCTATGGGTCAATGCC	epi genes
HDAC3	HDAC3_f	ATAGCCTGGTCCTGCATTA	epi genes
HDAC3	HDAC3_g	GTAATGCAGGACCAGGCTA	epi genes
HDAC3	HDAC3_h	GAGACCGTAATGCAGGACC	epi genes
HDAC4	HDAC4_a	TCTGGCCGAGACCAGCCAG	epi genes
HDAC4	HDAC4_b	CAGCTCCACTGGCTGGTCT	epi genes
HDAC4	HDAC4_c	ATTCAGCAGCTCCACTGGC	epi genes
HDAC4	HDAC4_d	CAGGATTCAGCAGCTCCAC	epi genes
HDAC4	HDAC4_e	GCATGTGGTTCACGCGGGC	epi genes
HDAC4	HDAC4_f	CTGGGCATGTGGTTCACGC	epi genes
HDAC4	HDAC4_g	GTGAACCACATGCCCAGCA	epi genes
HDAC4	HDAC4_h	ACGGCGCTGCCTCTGCAAG	epi genes
HEATR6	HEATR6_a	TGGCTGCTGTGCAAGTTGT	SE associated gene
HEATR6	HEATR6_b	TGTGCAAGTTGTCGGTTCG	SE associated gene
HEATR6	HEATR6_c	GTGGCCTTCCGTGCAGCCG	SE associated gene
HEATR6	HEATR6_d	CCTTCCGTGCAGCCGCGGG	SE associated gene
HEATR6	HEATR6_e	CCTCCCGCGGCTGCACGGA	SE associated gene
HEATR6	HEATR6_f	GGTGCCTCCCGCGGCTGCA	SE associated gene
HEATR6	HEATR6_g	GCTCAGGGATTGCTTCCCG	SE associated gene
HEATR6	HEATR6_h	CAATCCCTGAGCGAGGCAA	SE associated gene
HEG1	HEG1_a	CTGCAGCTGGAGCGCCGCC	SE associated gene
HEG1	HEG1_b	TGTCGCGGCGCCTGGCTCA	SE associated gene
HEG1	HEG1_c	GCCAGGCGCCGCGACACAG	SE associated gene
HEG1	HEG1_d	TGGCCAGAAAGTAACACTG	SE associated gene
HEG1	HEG1_e	ACCTTCTATCAGAATCAAG	SE associated gene
HEG1	HEG1_f	TCCTCTTGATTCTGATAGA	SE associated gene
HEG1	HEG1_g	CAACAGTGTCCTCCAAAGA	SE associated gene
HEG1	HEG1_h	TCCTCCAAAGAGGGCGTGA	SE associated gene
HNRNPAB	HNRNPAB_a	GCGGGCGAGGAGCAGCCCA	SE associated gene
HNRNPAB	HNRNPAB_b	AGCAGCCCATGGAGACGAC	SE associated gene
HNRNPAB	HNRNPAB_c	TGGCGCCCGTCGTCTCCAT	SE associated gene
HNRNPAB	HNRNPAB_d	CGACGGGCGCCACCGAGAA	SE associated gene
HNRNPAB	HNRNPAB_e	GCCACCGAGAACGGACATG	SE associated gene
HNRNPAB	HNRNPAB_f	GCCTCATGTCCGTTCTCGG	SE associated gene
HNRNPAB	HNRNPAB_g	ACGGCCTCATGTCCGTTCT	SE associated gene
HNRNPAB	HNRNPAB_h	CCGAAGGCGAGTCGCCGGC	SE associated gene
HOXD1	HOXD1_a	CATGACACGTACTCCAGGT	SE associated gene
HOXD1	HOXD1_b	GCTGCATGACACGTACTCC	SE associated gene
HOXD1	HOXD1_c	GAAGGCGAGGGTCGGGCGG	SE associated gene
HOXD1	HOXD1_d	GGCGAAGGCGAGGGTCGGG	SE associated gene
HOXD1	HOXD1_e	CGGCCGTCCGTACCGCCTC	SE associated gene
HOXD1	HOXD1_f	CGGCCGGAGGCGGTACGGA	SE associated gene
HOXD1	HOXD1_g	CAGTACGCGCAGTGCACCC	SE associated gene
HOXD1	HOXD1_h	AGGGTGCACTGCGCGTACT	SE associated gene
HOXD11	HOXD11_a	TGAACGACTTTGACGAGTG	SE associated gene
HOXD11	HOXD11_b	GTACATGCTGGCTGCGCTC	SE associated gene
HOXD11	HOXD11_c	CAGCCAGCATGTACCTGCC	SE associated gene
HOXD11	HOXD11_d	CAGCCCGGCAGGTACATGC	SE associated gene
HOXD11	HOXD11_e	ATAGTAGGCGCAGCCCGGC	SE associated gene
HOXD11	HOXD11_f	CCGGGCTGCGCCTACTATG	SE associated gene
HOXD11	HOXD11_g	CCACATAGTAGGCGCAGCC	SE associated gene
HOXD11	HOXD11_h	TTGCTAGCGAAGTCAGACG	SE associated gene
HOXD3	HOXD3_a	TTATTTGAGCAGGGTCAGC	SE associated gene
HOXD3	HOXD3_b	GAGCAGGGTCAGCAGGCCC	SE associated gene
HOXD3	HOXD3_c	GTGCACTCAGGAAGCTCCA	SE associated gene
HOXD3	HOXD3_d	CCTGAGTGCACAATGCAGA	SE associated gene
HOXD3	HOXD3_e	CCTTCTGCATTGTGCACTC	SE associated gene
HOXD3	HOXD3_f	CAGGACTGTTTGGAGGCTA	SE associated gene
HOXD3	HOXD3_g	CATAGCCTCCAAACAGTCC	SE associated gene
HOXD3	HOXD3_h	CCTGCTGCTGCCAGCTCCC	SE associated gene
HOXD4	HOXD4_a	ATGGTGAACTCCAAGTATG	SE associated gene
HOXD4	HOXD4_b	CCCAAGTTCCCTCCGTGCG	SE associated gene
HOXD4	HOXD4_c	CAAATACTCCTCGCACGGA	SE associated gene
HOXD4	HOXD4_d	CGTGCGAGGAGTATTTGCA	SE associated gene
HOXD4	HOXD4_e	CCTGCAAATACTCCTCGCA	SE associated gene
HOXD4	HOXD4_f	GCGAGGAGTATTTGCAGGG	SE associated gene
HOXD4	HOXD4_g	ATTTGCAGGGCGGCTACCT	SE associated gene
HOXD4	HOXD4_h	GGCGGCTACCTAGGCGAGC	SE associated gene
HRASLS2	HRASLS2_a	CCAGACCAAGACCGAGACT	SE associated gene
HRASLS2	HRASLS2_b	CCAAGTCTCGGTCTTGGTC	SE associated gene
HRASLS2	HRASLS2_c	GGTCTCCAAGTCTCGGTCT	SE associated gene
HRASLS2	HRASLS2_d	CAATCAGGTCTCCAAGTCT	SE associated gene
HRASLS2	HRASLS2_e	AAAGCGAGAAATCTCAATC	SE associated gene
HRASLS2	HRASLS2_f	TCGCTTTGGCTATGCACAC	SE associated gene
HRASLS2	HRASLS2_g	GCACACTGGGCCATCTACG	SE associated gene
HRASLS2	HRASLS2_h	TAGCCATCTCCCACGTAGA	SE associated gene
HS6ST1	HS6ST1_a	GTGCTGGTGGTGGCGGGCT	SE associated gene
HS6ST1	HS6ST1_b	TAGTACTTCTTCTCGTAGT	SE associated gene
HS6ST1	HS6ST1_c	GAGAAGAAGTACTACTTCC	SE associated gene
HS6ST1	HS6ST1_d	CGTCGTTGCATATGTGTGA	SE associated gene
HS6ST1	HS6ST1_e	GGCGGCAGCTCCTCAGGCG	SE associated gene
HS6ST1	HS6ST1_f	AGCAGGGCGGCAGCTCCTC	SE associated gene
HS6ST1	HS6ST1_g	TGCTATTGTACTGCATGAA	SE associated gene
HS6ST1	HS6ST1_h	CATGCAGTACAATAGCACG	SE associated gene
ID2	ID2_a	GCCTGTCGGACCACAGCCT	SE associated gene
ID2	ID2_b	GCCCAGGCTGTGGTCCGAC	SE associated gene
ID2	ID2_c	CCGGGAGATGCCCAGGCTG	SE associated gene
ID2	ID2_d	TTTGCTCCGGGAGATGCCC	SE associated gene
ID2	ID2_e	GCTCATCGGGTCGTCCACA	SE associated gene
ID2	ID2_f	GTTGTATAGCAGGCTCATC	SE associated gene
ID2	ID2_g	GTCGTTCATGTTGTATAGC	SE associated gene
ID2	ID2_h	TGCTCACCTTCTTGTTCTG	SE associated gene
IGFBP5	IGFBP5_a	ACCGCGGTCCTCCTGCTGC	SE associated gene
IGFBP5	IGFBP5_b	GCCAGCAGCAGGAGGACCG	SE associated gene
IGFBP5	IGFBP5_c	ATAGGCGGCCAGCAGCAGG	SE associated gene
IGFBP5	IGFBP5_d	GCTGCTGGCCGCCTATGCG	SE associated gene
IGFBP5	IGFBP5_e	CGCATAGGCGGCCAGCAGC	SE associated gene
IGFBP5	IGFBP5_f	CACGAAGGAGCCCAGGCTC	SE associated gene
IGFBP5	IGFBP5_g	GCAGTGCACGAAGGAGCCC	SE associated gene
IGFBP5	IGFBP5_h	CAGGGCTCGCAGTGCACGA	SE associated gene
IL27	IL27_a	GCCAGACGGCAGGCGACCT	SE associated gene
IL27	IL27_b	GCCAAGGTCGCCTGCCGTC	SE associated gene
IL27	IL27_c	GACGGCAGGCGACCTTGGC	SE associated gene
IL27	IL27_d	GAGCAAGGGAAGCAGCAAC	SE associated gene
IL27	IL27_e	TTGCTGCTTCCCTTGCTCC	SE associated gene
IL27	IL27_f	CCTTGCTCCTGGTTCAAGC	SE associated gene
IL27	IL27_g	CCAGCTTGAACCAGGAGCA	SE associated gene
IL27	IL27_h	CCTGGTTCAAGCTGGTGTC	SE associated gene
IL34	IL34_a	GCGCAGCCAGGTGAAGCCC	SE associated gene
IL34	IL34_b	CTTGGGATCTTCCTTGGCG	SE associated gene
IL34	IL34_c	ATCTTCCTTGGCGTGGCCT	SE associated gene
IL34	IL34_d	CTTCCTTGGCGTGGCCTTG	SE associated gene
IL34	IL34_e	GAATGAGCCTTTGGAGATG	SE associated gene
IL34	IL34_f	TCAAGGGCCACATCTCCAA	SE associated gene
IL34	IL34_g	TGGCCCTTGACGCAGAATG	SE associated gene
IL34	IL34_h	CACTCCTCATTCTGCGTCA	SE associated gene
INHBB	INHBB_a	GCCGCCTGCCTTCTGCTGC	SE associated gene
INHBB	INHBB_b	TCTGCTGCTGGCGGCCGGC	SE associated gene
INHBB	INHBB_c	TGCTGGCGGCCGGCTGGCT	SE associated gene
INHBB	INHBB_d	GTGTCCTGCGAGCCACCCG	SE associated gene
INHBB	INHBB_e	AGGACACCTGTACGTCGTG	SE associated gene
INHBB	INHBB_f	ACACCTGTACGTCGTGCGG	SE associated gene
INHBB	INHBB_g	AAGCCGCCGCACGACGTAC	SE associated gene
INHBB	INHBB_h	TACGTCGTGCGGCGGCTTC	SE associated gene
INPP5J	INPP5J_a	GGAGGGATGTGACATCGTC	SE associated gene
INPP5J	INPP5J_b	GTCACATCCCTCCTCCACC	SE associated gene
INPP5J	INPP5J_c	CCACCGCCCAGGTGGAGGA	SE associated gene
INPP5J	INPP5J_d	GTCACCACCGCCCAGGTGG	SE associated gene
INPP5J	INPP5J_e	GCTGTCGTCACCACCGCCC	SE associated gene
INPP5J	INPP5J_f	GCGGTGGTGACGACAGCGA	SE associated gene
INPP5J	INPP5J_g	GCGCAGACATGATCGCCAT	SE associated gene
INPP5J	INPP5J_h	ATGCTCAACAAGCGACTCA	SE associated gene
INSL3	INSL3_a	AGCGCCCAGGCGGGCAGAC	SE associated gene
INSL3	INSL3_b	GCCTGGGCGCTGGTGCTGC	SE associated gene
INSL3	INSL3_c	AGCAGCACCAGCGCCCAGG	SE associated gene
INSL3	INSL3_d	CCCAGCAGCACCAGCGCCC	SE associated gene
INSL3	INSL3_e	CCTGCCCTGGTGTTCGCGT	SE associated gene
INSL3	INSL3_f	CAACGCGAACACCAGGGCA	SE associated gene
INSL3	INSL3_g	ACAACTTCTCACGCATCTC	SE associated gene
INSL3	INSL3_h	AGATGCGTGAGAAGTTGTG	SE associated gene
IQCC	IQCC_a	CCAGAGCTGCTGGTTCGGA	SE associated gene
IQCC	IQCC_b	CCTTCCGAACCAGCAGCTC	SE associated gene
IQCC	IQCC_c	GCGTCGGACCAAGAAGCCC	SE associated gene
IQCC	IQCC_d	CAGGCTCTGGAACTGGCGT	SE associated gene
IQCC	IQCC_e	AGCTCGCAGGCTCTGGAAC	SE associated gene
IQCC	IQCC_f	ATACTCAGCTCGCAGGCTC	SE associated gene
IQCC	IQCC_g	AGCCTGCGAGCTGAGTATG	SE associated gene
IQCC	IQCC_h	CGCCTCATACTCAGCTCGC	SE associated gene
ITGA11	ITGA11_a	GAGCGCCCAGGCCACCACC	SE associated gene
ITGA11	ITGA11_b	GGCCTGGGCGCTCAGCCTG	SE associated gene
ITGA11	ITGA11_c	GGCCACAGGCTGAGCGCCC	SE associated gene
ITGA11	ITGA11_d	TTCACGGACACCTTCAACA	SE associated gene
ITGA11	ITGA11_e	CACCTTCAACATGGACACC	SE associated gene
ITGA11	ITGA11_f	CCGGGTCATCCCTGGCTCC	SE associated gene
ITGA11	ITGA11_g	TGGAGCCAGGGATGACCCG	SE associated gene
ITGA11	ITGA11_h	GAAGGCGGTCCTGGAGCCA	SE associated gene
ITGB5	ITGB5_a	CAGGCGTACAGCGGCGCCG	SE associated gene
ITGB5	ITGB5_b	GGCAGGCGTACAGCGGCGC	SE associated gene
ITGB5	ITGB5_c	GCTGTACGCCTGCCTCCTG	SE associated gene
ITGB5	ITGB5_d	CCAGGAGGCAGGCGTACAG	SE associated gene
ITGB5	ITGB5_e	GCTCTGCGCGCTCCTGCCC	SE associated gene
ITGB5	ITGB5_f	AGACATTCTTCACATGAGG	SE associated gene
ITGB5	ITGB5_g	AGCAGACATTCTTCACATG	SE associated gene
ITGB5	ITGB5_h	CCCACGGTCCATCACCTCT	SE associated gene
JAK3	JAK3_a	ATGAACGCTGAGGGATCAG	SE associated gene
JAK3	JAK3_b	GAGGCTGCATGAACGCTGA	SE associated gene
JAK3	JAK3_c	TCATGCAGCCTCTTGTCCA	SE associated gene
JAK3	JAK3_d	TGCAGCCTCTTGTCCACGG	SE associated gene
JAK3	JAK3_e	GCCTCTTGTCCACGGAGGC	SE associated gene
JAK3	JAK3_f	ACCAGCCTCCGTGGACAAG	SE associated gene
JAK3	JAK3_g	TGCAGGGCACCAGCCTCCG	SE associated gene
JAK3	JAK3_h	GCGGGCAGCAGCACATGCA	SE associated gene
JDP2	JDP2_a	AAGGGTCCGGGATCTGCCC	SE associated gene
JDP2	JDP2_b	CGGACCCTTCGGTGACCAC	SE associated gene
JDP2	JDP2_c	CTGTGGTCACCGAAGGGTC	SE associated gene
JDP2	JDP2_d	GGAGCCTGTGGTCACCGAA	SE associated gene
JDP2	JDP2_e	TGACCACAGGCTCCCTGCC	SE associated gene
JDP2	JDP2_f	CCCAGCTCGGCCCTGACTG	SE associated gene
JDP2	JDP2_g	CACAGTCAGGGCCGAGCTG	SE associated gene
JDP2	JDP2_h	AGCTCGGCCCTGACTGTGG	SE associated gene
KAT2B	KAT2B_a	GAAGCGCCGCAGGCTGCGG	epi genes
KAT2B	KAT2B_b	TGCGGTCCGGCGACGGCAG	epi genes
KAT2B	KAT2B_c	ACTGCCGTCGCCGGACCGC	epi genes
KAT2B	KAT2B_d	CTGCAGCCACTGCCGTCGC	epi genes
KAT2B	KAT2B_e	GCGACGGCAGTGGCTGCAG	epi genes
KAT2B	KAT2B_f	GCAGTGGCTGCAGCGGGCA	epi genes
KAT2B	KAT2B_g	CTGCAGCGGGCACGGCCGA	epi genes
KAT2B	KAT2B_h	CGGGCACGGCCGAAGGACC	epi genes
KCNC4	KCNC4_a	GTGTGTCTCCTCCTACCGC	SE associated gene
KCNC4	KCNC4_b	TCCTACCGCGGGCGCAAGT	SE associated gene
KCNC4	KCNC4_c	GACTTGCGCCCGCGGTAGG	SE associated gene
KCNC4	KCNC4_d	CTACCGCGGGCGCAAGTCG	SE associated gene
KCNC4	KCNC4_e	CCCGACTTGCGCCCGCGGT	SE associated gene
KCNC4	KCNC4_f	ACATGTCTGAAGGAGGAGA	SE associated gene
KCNC4	KCNC4_g	TGAAGGAGGAGATGGCCAA	SE associated gene
KCNC4	KCNC4_h	GAGGAGATGGCCAAGGGCG	SE associated gene
KCNJ12	KCNJ12_a	TACAGCATCGTGTCATCGG	SE associated gene
KCNJ12	KCNJ12_b	AGCATCGTGTCATCGGAGG	SE associated gene
KCNJ12	KCNJ12_c	TCGTGTCATCGGAGGAGGA	SE associated gene
KCNJ12	KCNJ12_d	GGCGAACTCAATGTTGCAC	SE associated gene
KCNJ12	KCNJ12_e	AACATTGAGTTCGCCAACA	SE associated gene
KCNJ12	KCNJ12_f	CTGTGTGGACATCCGCTGG	SE associated gene
KCNJ12	KCNJ12_g	GAGCAGCATGTACCGCCAG	SE associated gene
KCNJ12	KCNJ12_h	ATGATGCCGAACAGCAGCC	SE associated gene
KCNJ18	KCNJ18_a	TACAGCATCGTGTCATTGG	SE associated gene
KCNJ18	KCNJ18_b	AGCATCGTGTCATTGGAGG	SE associated gene
KCNJ18	KCNJ18_c	TCGTGTCATTGGAGGAGGA	SE associated gene
KCNJ18	KCNJ18_d	GGCGAACGCAATGTTGCAC	SE associated gene
KCNJ18	KCNJ18_e	AACATTGCGTTCGCCAACA	SE associated gene
KCNJ18	KCNJ18_f	GAGCAGCATGTAGCGCCAG	SE associated gene
KCNJ18	KCNJ18_g	ATGACGCCGAACAGCAGCC	SE associated gene
KCNJ18	KCNJ18_h	GCTGTTCGGCGTCATCTTC	SE associated gene
KCNK5	KCNK5_a	TGATGGCCGAGGTGAGCAG	SE associated gene
KCNK5	KCNK5_b	TCGGCCATCATCTTCTACC	SE associated gene
KCNK5	KCNK5_c	AGGTAGAAGATGATGGCCG	SE associated gene
KCNK5	KCNK5_d	TCATCTTCTACCTGGCCAT	SE associated gene
KCNK5	KCNK5_e	ATGGCCAGGTAGAAGATGA	SE associated gene
KCNK5	KCNK5_f	ATCTTCTACCTGGCCATCG	SE associated gene
KCNK5	KCNK5_g	GCGGCGATCTTCGAAGTGC	SE associated gene
KCNK5	KCNK5_h	GCGATCTTCGAAGTGCTGG	SE associated gene
KCNQ1	KCNQ1_a	GAGGCAGACCAGGACGATG	SE associated gene
KCNQ1	KCNQ1_b	GCTGAAGATGAGGCAGACC	SE associated gene
KCNQ1	KCNQ1_c	GGACAGCACGCTGAAGATG	SE associated gene
KCNQ1	KCNQ1_d	GCGGCATACTGCTCGATGG	SE associated gene
KCNQ1	KCNQ1_e	ATCGAGCAGTATGCCGCCC	SE associated gene
KCNQ1	KCNQ1_f	AGGGCGGCATACTGCTCGA	SE associated gene
KCNQ1	KCNQ1_g	AGTATGCCGCCCTGGCCAC	SE associated gene
KCNQ1	KCNQ1_h	CGTGCTGGTGGTGTTCTTC	SE associated gene
KDM1A	KDM1A_a	AAGAAGGCGGCAGCCGCGG	epi genes
KDM1A	KDM1A_b	GGCTGCAGCGGCAGCAACC	epi genes
KDM1A	KDM1A_c	GCAGCGGCAGCAACCGGGA	epi genes
KDM1A	KDM1A_d	GCGGCAGCAACCGGGACGG	epi genes
KDM1A	KDM1A_e	CAGCAACCGGGACGGAGGC	epi genes
KDM1A	KDM1A_f	CGGGACGGAGGCTGGCCCT	epi genes
KDM1A	KDM1A_g	CCAGGGCCAGCCTCCGTCC	epi genes
KDM1A	KDM1A_h	CTGGCCCTGGGACAGCAGG	epi genes
KDM1B	KDM1B_a	TCCTCAAAGGAAGGCTATC	epi genes
KDM1B	KDM1B_b	GCCTTCCTTTGAGGAGCTC	epi genes
KDM1B	KDM1B_c	TCCTTTGAGGAGCTCCGGT	epi genes
KDM1B	KDM1B_d	ACCGGAGCTCCTCAAAGGA	epi genes
KDM1B	KDM1B_e	GCCTACCGGAGCTCCTCAA	epi genes
KDM1B	KDM1B_f	GCAACAGAGACAACAGATG	epi genes
KDM1B	KDM1B_g	CAACAGATGAGGATGAAGA	epi genes
KDM1B	KDM1B_h	CAGATGAGGATGAAGATGG	epi genes
KDM2A	KDM2A_a	GCTAACTTGGGATCGCTGT	epi genes
KDM2A	KDM2A_b	ATCCCAAGTTAGCCCTCAC	epi genes
KDM2A	KDM2A_c	ACTCCAGTGAGGGCTAACT	epi genes
KDM2A	KDM2A_d	TACTATAGGAACTCCAGTG	epi genes
KDM2A	KDM2A_e	TGGAGTTCCTATAGTACAG	epi genes
KDM2A	KDM2A_f	CCCACTCGGCCAAAGGTGC	epi genes
KDM2A	KDM2A_g	CCCGCACCTTTGGCCGAGT	epi genes
KDM2A	KDM2A_h	AGTGTGAGGCTTCGTAATG	epi genes
KDM2B	KDM2B_a	GTATCGCTGGCGGTCAATC	epi genes
KDM2B	KDM2B_b	GTTCTCGTCGTATCGCTGG	epi genes
KDM2B	KDM2B_c	CAGCGATACGACGAGAACG	epi genes
KDM2B	KDM2B_d	CTCGTTCTCGTCGTATCGC	epi genes
KDM2B	KDM2B_e	GACGAGAACGAGGACTTGT	epi genes
KDM2B	KDM2B_f	AACGAGGACTTGTCGGACG	epi genes
KDM2B	KDM2B_g	GAGGACTTGTCGGACGTGG	epi genes
KDM2B	KDM2B_h	AGGAGATCGTCAGCGTCCG	epi genes
KDM3A	KDM3A_a	GCTCACGCTCGGAGAAAGT	epi genes
KDM3A	KDM3A_b	ACGCTCGGAGAAAGTTGGC	epi genes
KDM3A	KDM3A_c	GGAGAAAGTTGGCCGGTAT	epi genes
KDM3A	KDM3A_d	GAAAGTTGGCCGGTATTGG	epi genes
KDM3A	KDM3A_e	TCAGTCTGTCCGCAGCCGA	epi genes
KDM3A	KDM3A_f	CCGCAGCCGACGGCAGCGA	epi genes
KDM3A	KDM3A_g	CCATCGCTGCCGTCGGCTG	epi genes
KDM3A	KDM3A_h	TGGCTGCCATCGCTGCCGT	epi genes
KDM3B	KDM3B_a	AGCAGCCGCTTGCCCACCG	epi genes
KDM3B	KDM3B_b	CTGCTGTTCGCGGACACTG	epi genes
KDM3B	KDM3B_c	GACACTGCGGCCTCAGCCT	epi genes
KDM3B	KDM3B_d	AGCGGCGAGCGGAGATCCG	epi genes
KDM3B	KDM3B_e	GAGTGCGCAGCGCAGGCCC	epi genes
KDM3B	KDM3B_f	TGCGCTGCGCACTCGAGCC	epi genes
KDM3B	KDM3B_g	AGGCTCGAGTGCGCAGCGC	epi genes
KDM3B	KDM3B_h	CTGCGCACTCGAGCCTGGC	epi genes
KDM4A	KDM4A_a	AACTCTGAATCCCAGTGCT	epi genes
KDM4A	KDM4A_b	AAGGTCATTATCCTAGCAC	epi genes
KDM4A	KDM4A_c	TCTTCCATAGTTGGATAAA	epi genes
KDM4A	KDM4A_d	TTCGGAACTCTTCCATAGT	epi genes
KDM4A	KDM4A_e	TTGCCTACATTGAATCCCA	epi genes
KDM4A	KDM4A_f	GCTCCTTGGGATTCAATGT	epi genes
KDM4A	KDM4A_g	TGAATCCCAAGGAGCTCAT	epi genes
KDM4A	KDM4A_h	CCCAAGGAGCTCATCGGGC	epi genes
KDM4B	KDM4B_a	ATGACGTTTCGCCCAACCA	epi genes
KDM4B	KDM4B_b	CTTTAAATTCTTCCATGGT	epi genes
KDM4B	KDM4B_c	AAGTCTTTAAATTCTTCCA	epi genes
KDM4B	KDM4B_d	AAAGACTTCAACAAATACG	epi genes
KDM4B	KDM4B_e	TGGCCTACATAGAGTCGCA	epi genes
KDM4B	KDM4B_f	GCTCCCTGCGACTCTATGT	epi genes
KDM4B	KDM4B_g	GAGTCGCAGGGAGCCCACC	epi genes
KDM4B	KDM4B_h	TCGCAGGGAGCCCACCGGG	epi genes
KDM4C	KDM4C_a	TTCAGAGGACTTTCCACCT	epi genes
KDM4C	KDM4C_b	AAGGTCATTATCTTACAGC	epi genes
KDM4C	KDM4C_c	ATGACCTTCAGACCCTCCA	epi genes
KDM4C	KDM4C_d	ACCTTCAGACCCTCCATGG	epi genes
KDM4C	KDM4C_e	TCCTCCATGGAGGGTCTGA	epi genes
KDM4C	KDM4C_f	ACCCTCCATGGAGGAGTTC	epi genes
KDM4C	KDM4C_g	TCCCGGAACTCCTCCATGG	epi genes
KDM4C	KDM4C_h	AACTCCCGGAACTCCTCCA	epi genes
KDM4D	KDM4D_a	TTTGGATTCTGGGCACAGT	epi genes
KDM4D	KDM4D_b	TATGTTACAATTTGGATTC	epi genes
KDM4D	KDM4D_c	CATTAAACTCTTCTTTGGT	epi genes
KDM4D	KDM4D_d	GATAAATATATTGCTTACA	epi genes
KDM4D	KDM4D_e	TTGCTTACATGGAATCCCA	epi genes
KDM4D	KDM4D_f	CCCAAGGTGCACACAGAGC	epi genes
KDM4D	KDM4D_g	GCCAGCTCTGTGTGCACCT	epi genes
KDM4D	KDM4D_h	GGTGCACACAGAGCTGGCT	epi genes
KDM5A	KDM5A_a	CCAACTCGGCTCAAAGACG	epi genes
KDM5A	KDM5A_b	GTCTTTGAGCCGAGTTGGG	epi genes
KDM5A	KDM5A_c	TCCCAACTCGGCTCAAAGA	epi genes
KDM5A	KDM5A_d	CTGTGAACTCCTCCCAACT	epi genes
KDM5A	KDM5A_e	TGCGGCCGATAAAGCTGAG	epi genes
KDM5A	KDM5A_f	CAGCTTTATCGGCCGCATC	epi genes
KDM5A	KDM5A_g	CTCCGCCAAAGGCCGGATG	epi genes
KDM5A	KDM5A_h	TTACTTCACAGGCAAATGG	epi genes
KDM5B	KDM5B_a	CGGCCACCACACTGCACCC	epi genes
KDM5B	KDM5B_b	CGCGGGCCTGGGTGCAGTG	epi genes
KDM5B	KDM5B_c	GGAACTCGCCCAGCGGGCC	epi genes
KDM5B	KDM5B_d	AGGCAGGAACTCGCCCAGC	epi genes
KDM5B	KDM5B_e	CTGCCTCCACCCGAGTGCC	epi genes
KDM5B	KDM5B_f	CGGGCACTCGGGTGGAGGC	epi genes
KDM5B	KDM5B_g	AGACCGGGCACTCGGGTGG	epi genes
KDM5B	KDM5B_h	CGAAGACCGGGCACTCGGG	epi genes
KDM6A	KDM6A_a	ATCACACTGTAGATCTCCT	epi genes
KDM6A	KDM6A_b	CTGGGAGATAAAGCCACCA	epi genes
KDM6A	KDM6A_c	CTTGGTGGCTTTATCTCCC	epi genes
KDM6A	KDM6A_d	TGAATAGCATAGCTTTCCT	epi genes
KDM6A	KDM6A_e	GAATTAGGATCTGCTTCCA	epi genes
KDM6A	KDM6A_f	TGGAAGCAGATCCTAATTC	epi genes
KDM6A	KDM6A_g	TCCTAATTCTGGCCAGTCC	epi genes
KDM6A	KDM6A_h	GCCAGTCCTGGTATTTCCT	epi genes
KDM6B	KDM6B_a	ATCGGGCAGTGGACCCTCC	epi genes
KDM6B	KDM6B_b	AAAGGCTTCCCGTGCAGCG	epi genes
KDM6B	KDM6B_c	CACGGGAAGCCTTTGCCCT	epi genes
KDM6B	KDM6B_d	CGGGAAGCCTTTGCCCTTG	epi genes
KDM6B	KDM6B_e	TGAGGCGGGCAGGAGCTCC	epi genes
KDM6B	KDM6B_f	CAGCCATGCGCTACGAGGA	epi genes
KDM6B	KDM6B_g	CTCGTAGCGCATGGCTGCC	epi genes
KDM6B	KDM6B_h	CAGGCAGCCATGCGCTACG	epi genes
KIAA0196	KIAA0196_a	TAGCCGAGAACAACCTCTG	SE associated gene
KIAA0196	KIAA0196_b	TGGCCACAGAGGTTGTTCT	SE associated gene
KIAA0196	KIAA0196_c	CTGTGGCCAAGCAATCCTA	SE associated gene
KIAA0196	KIAA0196_d	TAGGATTGCTTGGCCACAG	SE associated gene
KIAA0196	KIAA0196_e	AACAATCCTTAGGATTGCT	SE associated gene
KIAA0196	KIAA0196_f	GCAATGATGGCATTACCAC	SE associated gene
KIAA0196	KIAA0196_g	GTTTATTCCTGCTGTGTTC	SE associated gene
KIAA0196	KIAA0196_h	GAGCTGATCAACAGAAATA	SE associated gene
KIAA0513	KIAA0513_a	AAGTCGATTAGCGAGCCCA	SE associated gene
KIAA0513	KIAA0513_b	CTAATCGACTTTGGGCCTG	SE associated gene
KIAA0513	KIAA0513_c	GAGAAGAGGTGGGTGCCTC	SE associated gene
KIAA0513	KIAA0513_d	CGCCGTCCTGCAGCACAGG	SE associated gene
KIAA0513	KIAA0513_e	CTGTGCTGCAGGACGGCGA	SE associated gene
KIAA0513	KIAA0513_f	CATCGCCGTCCTGCAGCAC	SE associated gene
KIAA0513	KIAA0513_g	CAGGACGGCGATGGCTCCC	SE associated gene
KIAA0513	KIAA0513_h	AGTGAGACCACTGAGTCTG	SE associated gene
KIAA1324	KIAA1324_a	CTGTAGCGAGGACCTTGAG	SE associated gene
KIAA1324	KIAA1324_b	CAGTGAAGCTGCCTGCCTC	SE associated gene
KIAA1324	KIAA1324_c	CAGTGGGTCTTCACACCAG	SE associated gene
KIAA1324	KIAA1324_d	ACTGCCCACCCTGCAACCC	SE associated gene
KIAA1324	KIAA1324_e	AGAAGCCTGGGTTGCAGGG	SE associated gene
KIAA1324	KIAA1324_f	TTGAAGAAGCCTGGGTTGC	SE associated gene
KIAA1324	KIAA1324_g	GGCTGGCAGGTGCTGTTGT	SE associated gene
KIAA1324	KIAA1324_h	CCTGCCAGCCCTGCCCATA	SE associated gene
KIF12	KIF12_a	AGGACCTTCGCCTGGCTGT	SE associated gene
KIF12	KIF12_b	CGGTCCAACAGCCAGGCGA	SE associated gene
KIF12	KIF12_c	TGCACGCGGTCCAACAGCC	SE associated gene
KIF12	KIF12_d	TGGACCGCGTGCAGCACCT	SE associated gene
KIF12	KIF12_e	GGCACCCAGGTGCTGCACG	SE associated gene
KIF12	KIF12_f	AAGAGGCGCGAAGGGTGAC	SE associated gene
KIF12	KIF12_g	ACCCTTCGCGCCTCTTATC	SE associated gene
KIF12	KIF12_h	TCCAGATAAGAGGCGCGAA	SE associated gene
KLHDC7A	KLHDC7A_a	CTGGGCCTCTGCTCCTCTG	SE associated gene
KLHDC7A	KLHDC7A_b	CATATCCAAATGCCAGTCC	SE associated gene
KLHDC7A	KLHDC7A_c	ATTTGGATATGCAGCTGAC	SE associated gene
KLHDC7A	KLHDC7A_d	GATATGCAGCTGACCGGCA	SE associated gene
KLHDC7A	KLHDC7A_e	ATGCAGCTGACCGGCAAGG	SE associated gene
KLHDC7A	KLHDC7A_f	GCTGACAGCACCACCTTGC	SE associated gene
KLHDC7A	KLHDC7A_g	GTCACCAGGAGCAGGGCAG	SE associated gene
KLHDC7A	KLHDC7A_h	GCCCTGCTCCTGGTGACTG	SE associated gene
KMT2A	KMT2A_a	GAGGAGGCTGCTGAGGCGG	epi genes
KMT2A	KMT2A_b	GACGACGAGGAGGCTGCTG	epi genes
KMT2A	KMT2A_c	GACGAGGCGGACGACGAGG	epi genes
KMT2A	KMT2A_d	GAAGACGAGGCGGACGACG	epi genes
KMT2A	KMT2A_e	GACGAAGACGAAGACGAGG	epi genes
KMT2A	KMT2A_f	GATGACGAAGACGAAGACG	epi genes
KMT2A	KMT2A_g	CATCGTCCTCAGCCTCTTC	epi genes
KMT2A	KMT2A_h	GCCGGCCCTGAAGAGGCTG	epi genes
KSR1	KSR1_a	CAAGGTGAAGGAGACGCTG	SE associated gene
KSR1	KSR1_b	CGCAGCGTCTCCTTCACCT	SE associated gene
KSR1	KSR1_c	GGAGACGCTGCGGCGCTGT	SE associated gene
KSR1	KSR1_d	GGTGAGGGCATACTGCAGA	SE associated gene
KSR1	KSR1_e	GTATGCCCTCACCTGCCTG	SE associated gene
KSR1	KSR1_f	GCCCTCACCTGCCTGCGGA	SE associated gene
KSR1	KSR1_g	ACCTTCCGCAGGCAGGTGA	SE associated gene
KSR1	KSR1_h	CCTGCCTGCGGAAGGTGAC	SE associated gene
LANCL2	LANCL2_a	AGCTTCAGCCTCTTTGACA	SE associated gene
LANCL2	LANCL2_b	AAGAGGCTGAAGCTCCACC	SE associated gene
LANCL2	LANCL2_c	GGCTGAAGCTCCACCTGGG	SE associated gene
LANCL2	LANCL2_d	CTGAAGCTCCACCTGGGAG	SE associated gene
LANCL2	LANCL2_e	GAGGCAGAAATGGAGGAAC	SE associated gene
LANCL2	LANCL2_f	CGGCCTCGTAGTCCGGGAA	SE associated gene
LANCL2	LANCL2_g	GGACTACGAGGCCGCCGCC	SE associated gene
LANCL2	LANCL2_h	CGGCGGCGGCCTCGTAGTC	SE associated gene
LCTL	LCTL_a	GCGTAGTCTCTGAAGTAGT	SE associated gene
LCTL	LCTL_b	AAGGCCTCAAAGCACAGGT	SE associated gene
LCTL	LCTL_c	CCCAAAGGCCTCAAAGCAC	SE associated gene
LCTL	LCTL_d	CGTGATCCAGTGCTTCACA	SE associated gene
LCTL	LCTL_e	GATCACGTTCAGTGATCCT	SE associated gene
LCTL	LCTL_f	AGACGGGCCACCATGCGCC	SE associated gene
LCTL	LCTL_g	CTTCAGGCCCGGCGCATGG	SE associated gene
LCTL	LCTL_h	GAGCTTCAGGCCCGGCGCA	SE associated gene
LDHD	LDHD_a	GGTTGCAGACCTGAGCAGT	SE associated gene
LDHD	LDHD_b	ACTGCTCAGGTCTGCAACC	SE associated gene
LDHD	LDHD_c	CTCTGCAGGGACTTCGTAG	SE associated gene
LDHD	LDHD_d	GACTTCGTAGAGGCTCTGA	SE associated gene
LDHD	LDHD_e	GTAGAGGCTCTGAAGGCCG	SE associated gene
LDHD	LDHD_f	AGGCTCTGAAGGCCGTGGT	SE associated gene
LDHD	LDHD_g	ACGTGGGAGCCGCCCACCA	SE associated gene
LDHD	LDHD_h	TCCCACGTGTCCACTGCCG	SE associated gene
LIMCH1	LIMCH1_a	AACGCAGTATCCGAGACAG	SE associated gene
LIMCH1	LIMCH1_b	GTCGATGTAGCCACTGTCT	SE associated gene
LIMCH1	LIMCH1_c	CAGTGGCTACATCGACTGC	SE associated gene
LIMCH1	LIMCH1_d	GAGAGGGAGTCGCTGCGCT	SE associated gene
LIMCH1	LIMCH1_e	CCCTCTCTCCTCCTCGCCA	SE associated gene
LIMCH1	LIMCH1_f	GCCGTGGCGAGGAGGAGAG	SE associated gene
LIMCH1	LIMCH1_g	CATCTCTGCCGTGGCGAGG	SE associated gene
LIMCH1	LIMCH1_h	AATCATCTCTGCCGTGGCG	SE associated gene
LINGO1	LINGO1_a	CAGGTGAGCAAGAGGATGC	SE associated gene
LINGO1	LINGO1_b	GAGCAAGAGGATGCTGGCG	SE associated gene
LINGO1	LINGO1_c	GGCTGCCAGCAGGCCAGGA	SE associated gene
LINGO1	LINGO1_d	GATGGGCTGCCAGCAGGCC	SE associated gene
LINGO1	LINGO1_e	AGGAGGATGGGCTGCCAGC	SE associated gene
LINGO1	LINGO1_f	TGGCAGCCCATCCTCCTGC	SE associated gene
LINGO1	LINGO1_g	CCCATCCTCCTGCTGGTGC	SE associated gene
LINGO1	LINGO1_h	CCAGCACCAGCAGGAGGAT	SE associated gene
LLGL2	LLGL2_a	GAGGCGGTTCCTGAGGCCA	SE associated gene
LLGL2	LLGL2_b	AGGGTCATGCCCTGGCCTC	SE associated gene
LLGL2	LLGL2_c	CCAGGGCATGACCCTGTGC	SE associated gene
LLGL2	LLGL2_d	CCCGCACAGGGTCATGCCC	SE associated gene
LLGL2	LLGL2_e	GCATGACCCTGTGCGGGAG	SE associated gene
LLGL2	LLGL2_f	CTTGAGCCTCTCCCGCACA	SE associated gene
LLGL2	LLGL2_g	TGTGCGGGAGAGGCTCAAG	SE associated gene
LLGL2	LLGL2_h	GCTTGAGCCTCTCCCGCAC	SE associated gene
LOC100287290	RP11-379F4.4_a	TTACACTTGGCAATCTTCT	SE associated gene
LOC100287290	RP11-379F4.4_b	ACTTGGCAATCTTCTAGGG	SE associated gene
LOC100287290	RP11-379F4.4_c	TGGCTGAACCCAGTGAACC	SE associated gene
LOC100287290	RP11-379F4.4_d	CTGAACCCAGTGAACCAGG	SE associated gene
LOC100287290	RP11-379F4.4_e	GGTAATCTGTCAGACCACA	SE associated gene
LOC100287290	RP11-379F4.4_f	AGAATGGCTGGGTAGGAAA	SE associated gene
LOC100287290	RP11-379F4.4_g	CTGATGAGAATGGCTGGGT	SE associated gene
LOC100287290	RP11-379F4.4_h	TTCTCTGATGAGAATGGCT	SE associated gene
KCNJ12	KCNJ12_a	TACAGCATCGTGTCATCGG	SE associated gene
KCNJ12	KCNJ12_b	AGCATCGTGTCATCGGAGG	SE associated gene
KCNJ12	KCNJ12_c	TCGTGTCATCGGAGGAGGA	SE associated gene
KCNJ12	KCNJ12_d	GGCGAACTCAATGTTGCAC	SE associated gene
KCNJ12	KCNJ12_e	AACATTGAGTTCGCCAACA	SE associated gene
KCNJ12	KCNJ12_f	CTGTGTGGACATCCGCTGG	SE associated gene
KCNJ12	KCNJ12_g	GAGCAGCATGTACCGCCAG	SE associated gene
KCNJ12	KCNJ12_h	ATGATGCCGAACAGCAGCC	SE associated gene
TTC6	TTC6_a	CAGGTGTTTCTGCTTGCAT	SE associated gene
TTC6	TTC6_b	TATACTCTGCTTGTATCTC	SE associated gene
TTC6	TTC6_c	GCAGAGTATAAATTCCAGA	SE associated gene
TTC6	TTC6_d	AAATTCCAGATGGGTGCTG	SE associated gene
TTC6	TTC6_e	CGATTCCTCAGCACCCATC	SE associated gene
TTC6	TTC6_f	ATCTGGAGAATACTTGACA	SE associated gene
TTC6	TTC6_g	ATTCTCCAGATTGAACAAG	SE associated gene
TTC6	TTC6_h	TATATCCTCTTGTTCAATC	SE associated gene
LOH12CR1	LOH12CR1_a	GGCAGTGAGCAGAGCTCCG	SE associated gene
LOH12CR1	LOH12CR1_b	TTGGGTCGGCTCTCGGCCT	SE associated gene
LOH12CR1	LOH12CR1_c	AGATCGTTGGGTCGGCTCT	SE associated gene
LOH12CR1	LOH12CR1_d	GGAGTTCAGATCGTTGGGT	SE associated gene
LOH12CR1	LOH12CR1_e	CTCTATGCTTGGCTGGTGA	SE associated gene
LOH12CR1	LOH12CR1_f	TCTTGGCTCTATGCTTGGC	SE associated gene
LOH12CR1	LOH12CR1_g	GCCAAGCATAGAGCCAAGA	SE associated gene
LOH12CR1	LOH12CR1_h	TCCATCTTGGCTCTATGCT	SE associated gene
LPCAT1	LPCAT1_a	GCCAGCGACGCTCGGCTGC	SE associated gene
LPCAT1	LPCAT1_b	GCCAGCAGCCGAGCGTCGC	SE associated gene
LPCAT1	LPCAT1_c	GGCGCAGCTCGTGCACGAA	SE associated gene
LPCAT1	LPCAT1_d	CGCCTCAGCGCCCTGCAGA	SE associated gene
LPCAT1	LPCAT1_e	GGCCTTCTGCAGGGCGCTG	SE associated gene
LPCAT1	LPCAT1_f	GAAGAGCGTCAGTGTCATG	SE associated gene
LPCAT1	LPCAT1_g	ATGACACTGACGCTCTTCC	SE associated gene
LPCAT1	LPCAT1_h	ACTGACGCTCTTCCCGGTC	SE associated gene
LRRC16A	LRRC16A_a	GGAACGTCAGAGCTCTCCT	SE associated gene
LRRC16A	LRRC16A_b	GAGAGCTCTGACGTTCCCA	SE associated gene
LRRC16A	LRRC16A_c	AAGTAAAGTTGGAAGTTAA	SE associated gene
LRRC16A	LRRC16A_d	GAAGGCTCGGCATGATGTA	SE associated gene
LRRC16A	LRRC16A_e	CGCTGTTACAAGGAAGGCT	SE associated gene
LRRC16A	LRRC16A_f	ATTCGCGCTGTTACAAGGA	SE associated gene
LRRC16A	LRRC16A_g	GAGTTAACCTTCAGCTACT	SE associated gene
LRRC16A	LRRC16A_h	TGAATCTCCAAGTAGCTGA	SE associated gene
LY6E	LY6E_a	ATCTTCTTGCCAGTGCTGC	SE associated gene
LY6E	LY6E_b	GTGCTGCTGGCTGCCCTTC	SE associated gene
LY6E	LY6E_c	GAAGGGCAGCCAGCAGCAC	SE associated gene
LY6E	LY6E_d	TGCTGCTGGCTGCCCTTCT	SE associated gene
LY6E	LY6E_e	CTGGCTGCCCTTCTGGGTG	SE associated gene
LY6E	LY6E_f	GAGAAGCACATCAGCGAGC	SE associated gene
LY6E	LY6E_g	TTGCTCTTCTGGTTCAAGC	SE associated gene
LY6E	LY6E_h	GCAGTACAGATTGCTCTTC	SE associated gene
MAD1L1	MAD1L1_a	TTGTTCAAAGATCTCAGGG	SE associated gene
MAD1L1	MAD1L1_b	AAGTTGTTCAAAGATCTCA	SE associated gene
MAD1L1	MAD1L1_c	AACTTCATCTCTCAGCGTG	SE associated gene
MAD1L1	MAD1L1_d	TTCATCTCTCAGCGTGTGG	SE associated gene
MAD1L1	MAD1L1_e	TCTCTCAGCGTGTGGAGGG	SE associated gene
MAD1L1	MAD1L1_f	AGCGTGTGGAGGGAGGCTC	SE associated gene
MAD1L1	MAD1L1_g	GTGGAGGGAGGCTCTGGAC	SE associated gene
MAD1L1	MAD1L1_h	GGACTGGATATTTCTACCT	SE associated gene
MAFB	MAFB_a	TGGCCGCGGAGCTGAGCAT	SE associated gene
MAFB	MAFB_b	GCGGGCTGGTGGGCAGCTC	SE associated gene
MAFB	MAFB_c	CCCACCAGCCCGCTGGCCA	SE associated gene
MAFB	MAFB_d	CCATGGCCAGCGGGCTGGT	SE associated gene
MAFB	MAFB_e	TACTCCATGGCCAGCGGGC	SE associated gene
MAFB	MAFB_f	GACATACTCCATGGCCAGC	SE associated gene
MAFB	MAFB_g	AAGTCGTTGACATACTCCA	SE associated gene
MAFB	MAFB_h	CTTCACGTCGAACTTGAGC	SE associated gene
MAP2K3	MAP2K3_a	CCGGGAGTCCAGGTTCCGG	SE associated gene
MAP2K3	MAP2K3_b	GATGAAGGTCCGGGAGTCC	SE associated gene
MAP2K3	MAP2K3_c	CCCGGACCTTCATCACCAT	SE associated gene
MAP2K3	MAP2K3_d	TCCAATGGTGATGAAGGTC	SE associated gene
MAP2K3	MAP2K3_e	CTGTCTCCAATGGTGATGA	SE associated gene
MAP2K3	MAP2K3_f	GAGGTGGAGGCTGATGACT	SE associated gene
MAP2K3	MAP2K3_g	TTGGTGACCATCTCAGAAC	SE associated gene
MAP2K3	MAP2K3_h	CCATCTCAGAACTGGGCCG	SE associated gene
MAP3K1	MAP3K1_a	GGAATCGCGCCTCGTCGTC	SE associated gene
MAP3K1	MAP3K1_b	CCTCGTCGTCGGGATTCCC	SE associated gene
MAP3K1	MAP3K1_c	CCCGGGAATCCCGACGACG	SE associated gene
MAP3K1	MAP3K1_d	TCGGGATTCCCGGGCGCCA	SE associated gene
MAP3K1	MAP3K1_e	GCTCGTAGCCCTGGCGCCC	SE associated gene
MAP3K1	MAP3K1_f	GCCAGGGCTACGAGCCCTG	SE associated gene
MAP3K1	MAP3K1_g	GCCTCAGGGCTCGTAGCCC	SE associated gene
MAP3K1	MAP3K1_h	CTACGAGCCCTGAGGCAGG	SE associated gene
MAP3K8	MAP3K8_a	TCTGATGTAATAGACATTA	SE associated gene
MAP3K8	MAP3K8_b	GACTGGGTTCATAAACTGC	SE associated gene
MAP3K8	MAP3K8_c	GACACATGGTCATTAGACT	SE associated gene
MAP3K8	MAP3K8_d	TGATTACTGTCTTGACACA	SE associated gene
MAP3K8	MAP3K8_e	CTAAGTCTCTGCTGCTTAG	SE associated gene
MAP3K8	MAP3K8_f	CTGCTGCTTAGTGGCCAAG	SE associated gene
MAP3K8	MAP3K8_g	ATCTGACTGATGACAACCA	SE associated gene
MAP3K8	MAP3K8_h	GGTTGTCATCAGTCAGATA	SE associated gene
MAPKAPK2	MAPKAPK2_a	TCCCAGGGCCAGAGCCCGC	SE associated gene
MAPKAPK2	MAPKAPK2_b	ACCGGCGGGCTCTGGCCCT	SE associated gene
MAPKAPK2	MAPKAPK2_c	GAACGGCACCGGCGGGCTC	SE associated gene
MAPKAPK2	MAPKAPK2_d	AACTGCGGGAACTGCTGCG	SE associated gene
MAPKAPK2	MAPKAPK2_e	CGCAGTTCCACGTCAAGTC	SE associated gene
MAPKAPK2	MAPKAPK2_f	CGGACTTGACGTGGAACTG	SE associated gene
MAPKAPK2	MAPKAPK2_g	CTGCAGGCCGGACTTGACG	SE associated gene
MAPKAPK2	MAPKAPK2_h	TTCTTCTTGATCTGCAGGC	SE associated gene
MAPKAPK5	MAPKAPK5_a	AGAAGAATACAGTATCAAT	SE associated gene
MAPKAPK5	MAPKAPK5_b	TCAATTGGACTCAGAAGCT	SE associated gene
MAPKAPK5	MAPKAPK5_c	GGACTCAGAAGCTGGGAGC	SE associated gene
MAPKAPK5	MAPKAPK5_d	AAAGAAATCTACTCAAGAA	SE associated gene
MAPKAPK5	MAPKAPK5_e	TGAACTATGTTTGGGTGTG	SE associated gene
MAPKAPK5	MAPKAPK5_f	GCCCGACTCTTAATTGTAA	SE associated gene
MAPKAPK5	MAPKAPK5_g	TCCATTACAATTAAGAGTC	SE associated gene
MAPKAPK5	MAPKAPK5_h	TTAATTGTAATGGAGATGA	SE associated gene
MARCKSL1	MARCKSL1_a	CTCGGCGGTCACGTCGCCC	SE associated gene
MARCKSL1	MARCKSL1_b	GGCGACGTGACCGCCGAGG	SE associated gene
MARCKSL1	MARCKSL1_c	TGACCGCCGAGGAGGCAGC	SE associated gene
MARCKSL1	MARCKSL1_d	GCGCCTGCTGCCTCCTCGG	SE associated gene
MARCKSL1	MARCKSL1_e	TGGCCGTTGGCCTTCGCGG	SE associated gene
MARCKSL1	MARCKSL1_f	CATCTGTTCCGTTCACAGG	SE associated gene
MARCKSL1	MARCKSL1_g	CCTGTGAACGGAACAGATG	SE associated gene
MARCKSL1	MARCKSL1_h	CTCATCTGTTCCGTTCACA	SE associated gene
MAST3	MAST3_a	GGACGAGTCGAGCCTCCTG	SE associated gene
MAST3	MAST3_b	AGCTGAGCCTGCCACGCCG	SE associated gene
MAST3	MAST3_c	GCCTGCCACGCCGAGGACG	SE associated gene
MAST3	MAST3_d	GCTCTTGCGGTTCCCGCTG	SE associated gene
MAST3	MAST3_e	AGCGGGAACCGCAAGAGCT	SE associated gene
MAST3	MAST3_f	ACCGCAAGAGCTTGGTGGT	SE associated gene
MAST3	MAST3_g	TCCTACCACCAAGCTCTTG	SE associated gene
MAST3	MAST3_h	GGACCGACAATGGCGACAG	SE associated gene
MB	MB_a	GCAGTTGGTGCTGAACGTC	SE associated gene
MB	MB_b	AGGTGGAGGCTGACATCCC	SE associated gene
MB	MB_c	GGCTGACATCCCAGGCCAT	SE associated gene
MB	MB_d	GACATCCCAGGCCATGGGC	SE associated gene
MB	MB_e	GGACTTCCTGCCCATGGCC	SE associated gene
MB	MB_f	GATGAGGACTTCCTGCCCA	SE associated gene
MB	MB_g	AAGGGTCACCCAGAGACTC	SE associated gene
MB	MB_h	AAACTTCTCCAGAGTCTCT	SE associated gene
MCF2L	MCF2L_a	ACAGAGCGGGACGATGTCC	SE associated gene
MCF2L	MCF2L_b	GATGTCGGCAGCACAGAGC	SE associated gene
MCF2L	MCF2L_c	CTCTGTGCTGCCGACATCC	SE associated gene
MCF2L	MCF2L_d	GGATGTCGGCAGCACAGAG	SE associated gene
MCF2L	MCF2L_e	GCGCTTCTTTAGCTGGTCC	SE associated gene
[truncated: 1,877 more rows]
