# Supplementary material for: Super-enhancer acquisition drives oncogene expression in triple negative breast cancer
Source: PLoS One. 2020 Jun 25;15(6):e0235343. doi: 10.1371/journal.pone.0235343 (PMC7316302; doi:10.1371/journal.pone.0235343)
Supplement: S9 Table — (XLSX) [file pone.0235343.s014.xlsx]

## Sheet: Sheet1
Table S9: BAMBI-distal superenhancers correlating with dependency
Superenhancer	chromosome	start	end	HCC38	HCC1409	HCC202	HUH1_LIVER	NCIH838_LUNG	BT549	CAL51	HCC1395	HCC1806	HCC1954	Hs578T	MDAMB157	MDAMB231	MDAMB436	MDAMB468	ZR75			SE	chromosome	start	end
Breast_SE_1970_1	6	24705588	24725588	5.8602	5.93696	5.72137	5.67229	5.48854	2.81883	2.61679	2.71261	1.89991	2.51153	2.76273	2.63194	2.81985	2.34325	2.59525	2.55508			Breast_SE_1_1	1	895298	915298
Breast_SE_3505_8	11	65121557	65141557	6.14036	6.34334	6.31829	5.43092	5.82477	2.82855	2.81186	2.89492	2.07942	2.5411	2.74536	2.58796	2.84037	2.57377	2.69066	2.44889			Breast_SE_1_2	1	915298	935298
Breast_SE_1988_3	6	31646089	31666089	6.56241	6.18211	6.72514	6.14436	5.9244	2.98183	2.90553	2.91208	2.27226	2.54597	2.94013	2.80917	2.99684	2.50468	2.79558	2.53316			Breast_SE_1_3	1	935298	955298
Breast_SE_4499_1	16	47451873	47471873	5.20754	5.39636	5.70796	5.51741	5.39672	2.55122	2.65155	2.57244	1.66218	2.54226	2.52137	2.17741	2.66657	2.24744	2.48101	2.51803			Breast_SE_1_4	1	955298	975298
Breast_SE_4500_1	16	47451452	47471452	5.20472	5.39517	5.71105	5.51696	5.40602	2.55052	2.65025	2.5729	1.6476	2.54345	2.52193	2.17422	2.66657	2.25511	2.48158	2.51688			Breast_SE_1_5	1	975298	995298
Breast_SE_1984_13	6	30712578	30732578	6.38589	5.57083	6.27857	5.69524	5.8304	2.98598	2.87894	2.80678	2.23834	2.77778	2.89768	2.831	2.95822	2.50687	2.78314	2.73214			Breast_SE_1_6	1	995298	1015298
Breast_SE_3238_3	10	68329852	68349852	5.93763	5.45663	6.02534	5.45568	5.36662	2.93107	2.78675	2.77686	1.82425	2.36099	2.74148	2.69794	2.83181	2.52283	2.55264	2.57153			Breast_SE_1_7	1	1015298	1035298
Breast_SE_5112_3	19	49434514	49454514	4.06027	4.97539	5.54188	5.2839	5.54542	2.7389	2.72255	2.63926	1.77467	2.02517	2.6825	2.26755	2.73725	1.9614	2.3734	2.43325			Breast_SE_1_8	1	1035298	1055298
Breast_SE_244_3	1	109074494	109094494	5.8503	5.48988	5.56	5.14151	6.07513	2.6556	2.56393	2.49884	1.77303	2.37773	2.502	2.38285	2.68199	2.38088	2.47417	2.21782			Breast_SE_1_9	1	1055298	1075298
Breast_SE_3505_23	11	65421557	65441557	6.86977	7.16066	7.12778	6.64155	6.75276	3.1033	2.81574	2.99194	2.46137	3.03005	2.80931	2.89193	2.92775	2.73844	2.73591	2.81054			Breast_SE_1_10	1	1075298	1095298
Breast_SE_312_4	1	153957651	153977651	6.41165	6.99656	7.70579	6.4042	6.26053	2.96743	2.94352	2.94785	2.3612	2.91103	2.80917	2.82732	2.97258	2.88776	2.88552	3.05351			Breast_SE_1_11	1	1095298	1115298
Breast_SE_5439_36	22	38164943	38184943	5.26645	5.63506	6.68859	4.90651	5.15714	2.69773	2.53309	2.47318	1.73085	2.66121	2.86191	2.31836	2.71494	2.18227	2.8736	2.35475			Breast_SE_1_12	1	1115298	1135298
Breast_SE_616_2	2	27356046	27376046	5.97987	6.52396	6.56193	6.017	5.2937	2.89738	2.84594	2.90046	2.14424	2.40664	2.8647	2.78168	2.80857	2.55816	2.63255	2.59666			Breast_SE_1_13	1	1135298	1155298
Breast_SE_3500_29	11	62833572	62853572	6.00675	5.91819	5.74697	5.39678	5.10311	2.74798	2.74249	2.89253	1.74467	2.42389	2.66452	2.60326	2.83762	2.40501	2.53841	2.34823			Breast_SE_1_14	1	1155298	1175298
Breast_SE_5126_4	19	54146099	54166099	4.85484	5.24955	5.18749	4.45589	4.88271	2.66651	2.5643	2.54461	1.84277	2.14869	2.50224	2.60448	2.59018	2.27152	2.56695	2.47193			Breast_SE_1_15	1	1175298	1195298
Breast_SE_825_1	2	156318088	156338088	2.87436	5.89097	6.42282	5.63671	6.90293	2.457	2.49521	2.66055	1.90753	1.95055	2.32302	2.04205	2.8302	1.95155	2.51594	2.40124			Breast_SE_1_16	1	1195298	1215298
Breast_SE_1977_3	6	27829974	27849974	6.46881	5.86108	6.89731	6.41198	5.7799	2.92243	2.6976	2.90849	1.99416	2.90595	2.80366	2.76136	2.75842	2.31756	2.67525	2.77919			Breast_SE_1_17	1	1215298	1235298
Breast_SE_2377_2	7	66645964	66665964	4.60281	5.62342	5.92184	5.16949	5.35374	2.67567	2.68034	2.68036	1.53981	1.99591	2.62057	2.50047	2.66134	2.43909	2.23382	2.30791			Breast_SE_1_18	1	1235298	1255298
Breast_SE_3117_1	10	1032056	1052056	5.33794	5.54225	6.08887	4.66616	5.25617	2.69834	2.54817	2.64199	1.81508	2.21094	2.44031	2.59024	2.66693	2.41823	2.47868	2.36795			Breast_SE_1_19	1	1255298	1275298
Breast_SE_248_2	1	110338441	110358441	6.2892	5.20165	5.3293	5.37865	5.66056	2.75817	2.70193	2.62766	1.7095	2.04368	2.65152	2.53035	2.67086	2.38303	2.50128	2.36032			Breast_SE_1_20	1	1275298	1295298
Breast_SE_5367_1	21	42876216	42896216	4.98313	6.1328	6.31436	5.46212	5.22372	2.74517	2.77864	2.71492	2.08742	2.03063	2.64373	2.61507	2.67161	2.40288	2.59961	2.31815			Breast_SE_1_21	1	1295298	1315298
Breast_SE_5113_7	19	49861743	49881743	6.7562	6.79203	7.13846	6.39425	6.66003	3.06782	3.0298	2.98961	2.68749	2.50878	2.97075	2.60395	3.02175	2.81169	2.85788	2.6794			Breast_SE_1_22	1	1315298	1335298
Breast_SE_1917_2	6	4005617	4025617	5.96058	5.93889	5.8885	5.45514	5.05004	2.88948	2.7266	2.84506	1.9642	2.78032	2.70641	2.71418	2.80023	2.47408	2.68118	2.61401			Breast_SE_1_23	1	1335298	1355298
Breast_SE_5444_18	22	39502585	39522585	5.43002	6.00174	6.29594	5.51446	5.24132	2.90629	2.8961	2.89376	2.07405	2.12283	2.88376	2.65202	2.73753	2.55212	2.64524	2.45084			Breast_SE_1_24	1	1355298	1375298
Breast_SE_4900_1	18	21595964	21615964	5.51269	6.07201	5.61533	5.8098	5.22697	2.73048	2.72051	2.82008	1.71991	2.37401	2.65834	2.697	2.70005	2.38419	2.43111	2.62457			Breast_SE_1_25	1	1375298	1395298
Breast_SE_4682_3	17	28720399	28740399	6.52996	7.64104	7.42027	6.48847	6.00718	2.88097	2.98177	2.91783	2.56961	2.73212	2.75938	2.69575	2.93359	2.63718	2.73866	2.65713			Breast_SE_1_26	1	1395298	1415298
Breast_SE_5346_1	21	37254181	37274181	5.65052	6.49925	6.19375	5.65512	5.29549	2.78674	2.73582	2.49892	1.86662	2.72275	2.60583	2.76937	2.71688	2.58032	2.70736	2.38885			Breast_SE_1_27	1	1415298	1435298
Breast_SE_4058_1	14	20445864	20465864	4.96118	5.85897	6.43149	5.56646	5.34963	2.74068	2.68722	2.7283	2.07876	2.60925	2.51245	2.34427	2.70581	2.65509	2.70187	2.47614			Breast_SE_1_28	1	1435298	1455298
Breast_SE_3505_22	11	65401557	65421557	6.82633	6.77825	6.92369	6.91877	6.69651	2.9575	2.89298	2.99468	2.3992	2.90042	2.73779	2.80896	2.93497	2.79072	2.85081	2.51191			Breast_SE_1_29	1	1455298	1475298
Breast_SE_2964_2	9	83972503	83992503	5.46014	6.11999	6.0072	6.0984	5.63335	2.90938	2.83953	2.86137	2.04396	2.39882	2.75253	2.77424	2.87818	2.67437	2.54793	2.49628			Breast_SE_1_30	1	1475298	1495298
Breast_SE_5077_13	19	38844012	38864012	6.25428	7.14018	6.80056	6.25837	6.02231	2.96817	2.92439	2.92615	2.6257	2.65368	2.88614	2.88869	2.90573	2.74451	2.83758	2.7927			Breast_SE_1_31	1	1495298	1515298
Breast_SE_1098_4	3	49006592	49026592	6.35473	7.14909	6.85322	6.45588	6.41713	3.08462	3.05569	3.02288	2.56061	2.19207	3.02612	2.77524	3.03481	2.93256	2.81283	2.94124			Breast_SE_1_32	1	1515298	1535298
Breast_SE_2007_2	6	36439235	36459235	4.47717	4.87152	5.24059	5.24604	5.13885	2.37218	2.41913	2.51485	1.90734	2.30094	2.64915	2.31293	2.7566	2.1853	2.59861	2.49485			Breast_SE_1_33	1	1535298	1555298
Breast_SE_1973_6	6	26106833	26126833	6.5388	5.72709	6.48194	6.19806	5.39655	2.81865	2.76072	2.79649	1.73829	2.86572	2.77669	2.7525	2.85342	2.11672	2.56374	2.6706			Breast_SE_1_34	1	1555298	1575298
Breast_SE_810_1	2	135975376	135995376	4.40574	4.7504	4.49263	4.70261	5.09231	2.52099	2.34697	2.16985	1.4229	2.19295	2.40596	2.04937	2.4962	2.12916	2.2906	1.97875			Breast_SE_1_35	1	1575298	1595298
Breast_SE_300_1	1	151178958	151198958	5.50047	5.81934	6.80024	5.94992	6.04172	2.69298	2.60893	2.55854	1.91598	2.70188	2.50846	2.58194	2.82715	2.6669	2.59909	2.82136			Breast_SE_1_36	1	1595298	1615298
Breast_SE_4859_11	17	77276384	77296384	7.26871	7.5669	7.24639	6.74769	6.49439	2.87352	2.86033	2.93038	2.63985	2.95818	2.76476	2.95998	3.04776	2.71441	2.89183	2.87041			Breast_SE_1_37	1	1615298	1635298
Breast_SE_5068_3	19	36129512	36149512	6.37607	5.60075	5.83129	5.68454	5.52026	2.73658	2.86615	2.82782	2.04476	2.93663	2.63945	2.79698	2.83188	2.51094	2.93014	2.57026			Breast_SE_1_38	1	1635298	1655298
Breast_SE_322_12	1	156101803	156121803	6.84881	6.83229	6.40193	6.2522	6.74074	3.11185	2.90901	3.04984	2.5389	2.84766	2.9201	3.0079	3.06567	2.94273	3.02081	2.85691			Breast_SE_1_39	1	1655298	1675298
Breast_SE_1984_5	6	30552578	30572578	5.94522	5.83058	6.66993	5.74062	5.68019	2.8356	2.78171	2.75489	2.33581	2.24901	2.74258	2.5378	2.80701	2.52612	2.66289	2.28096			Breast_SE_1_40	1	1675298	1695298
Breast_SE_2358_4	7	51307246	51327246	0	4.95345	2.18246	4.83018	4.86394	0	0	0	0	0	0	0	0	0	0	1.62096			Breast_SE_1_41	1	1695298	1715298
Breast_SE_4702_1	17	36518280	36538280	5.24602	4.92221	5.3223	5.5439	5.12648	2.62789	2.6535	2.66996	1.57438	2.23213	2.53827	2.38098	2.62335	2.26885	2.26839	2.42823			Breast_SE_2_1	1	1713986	1733986
Breast_SE_894_2	2	200859238	200879238	5.26304	5.46491	5.22465	5.52398	5.67067	2.64814	2.6661	2.74923	1.71702	2.39581	2.63581	2.60575	2.77334	2.52992	2.47055	2.51199			Breast_SE_2_2	1	1733986	1753986
Breast_SE_4992_2	19	3959971	3979971	4.40398	5.24781	5.43014	4.87272	4.9327	2.83167	2.57372	2.51876	1.839	1.82168	2.6695	2.38682	2.62918	2.2731	2.37064	2.20548			Breast_SE_2_3	1	1753986	1773986
Breast_SE_1973_1	6	26006833	26026833	6.53077	5.90904	6.36352	7.07127	5.77962	2.87735	2.71333	2.83903	1.7244	2.16171	2.65402	2.70212	2.85323	2.0545	2.65958	2.64891			Breast_SE_2_4	1	1773986	1793986
Breast_SE_75_1	1	25229104	25249104	5.28192	5.82363	5.5093	5.20176	6.19093	2.9238	2.7183	2.80602	1.32605	2.52752	2.7269	2.61243	2.78591	2.40327	2.69117	2.43278			Breast_SE_2_5	1	1793986	1813986
Breast_SE_4876_3	18	3246544	3266544	6.54164	6.66079	7.00686	6.95133	6.16727	2.94404	2.93046	2.86372	2.65776	2.73001	2.93621	2.85831	2.97912	2.72768	2.98514	2.74817			Breast_SE_2_6	1	1813986	1833986
Breast_SE_1293_2	3	169764767	169784767	5.62553	5.60345	5.86601	5.44571	5.24439	2.70093	2.62373	2.68594	2.14109	2.46683	2.75915	2.46783	2.73216	2.57598	2.33278	2.46356			Breast_SE_2_7	1	1833986	1853986
Breast_SE_5126_6	19	54186099	54206099	6.67482	6.58572	6.59136	6.41267	6.197	3.02101	2.94229	2.90068	2.55393	2.54015	2.92525	2.94551	2.9801	2.88888	2.77464	2.64032			Breast_SE_2_8	1	1853986	1873986
Breast_SE_4293_1	15	50344987	50364987	5.65888	5.84838	6.02701	6.17138	5.54785	2.73761	2.76616	2.78342	2.1772	2.23895	2.70696	2.60644	2.68579	2.63788	2.45349	2.58541			Breast_SE_2_9	1	1873986	1893986
Breast_SE_4294_1	15	50345007	50365007	5.65888	5.84678	6.02762	6.17076	5.54785	2.7374	2.76616	2.78342	2.1772	2.23895	2.70696	2.60644	2.68579	2.63823	2.45349	2.58541			Breast_SE_2_10	1	1893986	1913986
Breast_SE_4292_1	15	50345036	50365036	5.65776	5.84678	6.02953	6.17065	5.54702	2.7374	2.76634	2.78363	2.1785	2.23895	2.70696	2.60683	2.68579	2.63755	2.45349	2.58605			Breast_SE_2_11	1	1913986	1933986
Breast_SE_4291_1	15	50344848	50364848	5.65991	5.85071	6.02579	6.17353	5.54618	2.73808	2.76594	2.78359	2.17714	2.23737	2.70639	2.60604	2.68579	2.63823	2.45422	2.58509			Breast_SE_2_12	1	1933986	1953986
Breast_SE_4290_1	15	50344888	50364888	5.65991	5.84991	6.02701	6.17291	5.54618	2.73787	2.76634	2.78359	2.1785	2.23895	2.70639	2.60604	2.68579	2.63823	2.45484	2.58524			Breast_SE_2_13	1	1953986	1973986
Breast_SE_1281_8	3	156810594	156830594	6.20998	6.60569	6.64956	6.59395	6.62299	2.95249	2.59368	2.56593	2.56762	2.46306	2.86487	2.60647	2.8121	2.47127	2.61891	2.14227			Breast_SE_2_14	1	1973986	1993986
Breast_SE_4289_1	15	50344809	50364809	5.65991	5.85064	6.02454	6.17602	5.54618	2.73804	2.76572	2.78359	2.17714	2.23737	2.70639	2.60644	2.68579	2.63823	2.45359	2.58495			Breast_SE_2_15	1	1993986	2013986
Breast_SE_4288_1	15	50345176	50365176	5.65673	5.84831	6.02766	6.17076	5.54536	2.7374	2.76634	2.78346	2.1785	2.23417	2.70696	2.60683	2.68664	2.63791	2.45275	2.58648			Breast_SE_3_1	1	2119037	2139037
Breast_SE_4285_1	15	50344454	50364454	5.65983	5.84904	6.02332	6.17749	5.54615	2.73761	2.76557	2.7829	2.1772	2.23224	2.70613	2.60764	2.68664	2.63648	2.45432	2.58416			Breast_SE_3_2	1	2139037	2159037
Breast_SE_4286_1	15	50344233	50364233	5.65863	5.84977	6.02207	6.18075	5.54618	2.73761	2.76579	2.7829	2.1772	2.23193	2.70639	2.60843	2.68575	2.63616	2.45359	2.58511			Breast_SE_3_3	1	2159037	2179037
Breast_SE_4287_1	15	50344189	50364189	5.66086	5.84977	6.02207	6.17963	5.54702	2.73761	2.76579	2.7829	2.1772	2.22868	2.70668	2.60882	2.68575	2.63616	2.45422	2.58494			Breast_SE_3_4	1	2179037	2199037
Breast_SE_1179_1	3	101670261	101690261	5.4717	5.65443	5.98822	5.00804	5.22985	2.80713	2.69995	2.68296	2.06136	2.09402	2.75388	2.63904	2.83121	2.58	2.5164	2.39797			Breast_SE_3_5	1	2199037	2219037
Breast_SE_292_1	1	149871259	149891259	5.87475	6.14446	6.97645	6.63495	6.12189	2.85028	2.76024	2.8754	1.58315	3.02775	2.70929	2.73704	2.79695	2.59145	2.36657	2.81907			Breast_SE_3_6	1	2219037	2239037
Breast_SE_5158_4	20	5112470	5132470	6.34184	5.95973	5.80526	5.95841	5.37405	2.84094	2.80041	2.75839	2.31967	2.66102	2.66179	2.56328	2.77947	2.44526	2.61829	2.39715			Breast_SE_3_7	1	2239037	2259037
Breast_SE_5097_23	19	45453827	45473827	5.46012	6.15785	5.91228	5.37191	6.22415	2.37094	2.33742	2.506	2.35315	1.80981	2.53554	1.74493	2.53788	1.76117	2.70385	2.15681			Breast_SE_3_8	1	2259037	2279037
Breast_SE_5014_51	19	11077030	11097030	5.90972	6.16759	6.14493	6.27496	6.68612	2.89872	2.80913	2.95009	2.49009	2.80735	2.88719	2.71846	3.04943	2.62952	2.8257	2.5488			Breast_SE_3_9	1	2279037	2299037
Breast_SE_5018_13	19	13142862	13162862	6.77672	7.44286	7.56233	6.23283	6.32451	3.05682	3.06139	3.17129	2.76081	2.85901	3.02529	3.03067	3.08967	3.08706	3.10649	2.82454			Breast_SE_3_10	1	2299037	2319037
Breast_SE_4104_1	14	39161335	39181335	5.88169	5.49203	5.76958	6.11157	4.982	2.7127	2.70131	2.72915	1.45442	2.45064	2.58836	2.50165	2.75287	2.19508	2.39225	2.44289			Breast_SE_3_11	1	2319037	2339037
Breast_SE_3784_6	12	56680416	56700416	5.93161	5.83647	5.80572	6.29356	5.26723	2.85155	2.77959	2.72458	1.93261	2.67902	2.6645	2.67656	2.79063	2.43299	2.45341	2.69794			Breast_SE_3_12	1	2339037	2359037
Breast_SE_2446_5	7	104998456	105018456	6.53562	6.08688	6.68646	6.26175	5.65278	2.98629	2.90433	3.06572	2.31483	2.71664	2.89983	2.85418	2.94824	2.86704	2.67376	2.69143			Breast_SE_3_13	1	2359037	2379037
Breast_SE_367_2	1	174983245	175003245	5.0497	4.94552	5.56415	4.40119	5.32696	2.67142	2.65197	2.74448	1.84591	2.4774	2.54074	2.45609	2.6689	2.46871	2.41715	2.58192			Breast_SE_3_14	1	2379037	2399037
Breast_SE_1241_4	3	136196122	136216122	5.35413	4.99798	5.13012	5.06013	5.03763	2.62043	2.62038	2.78271	1.71376	2.24558	2.62743	2.60017	2.48824	2.30602	2.23549	2.27483			Breast_SE_3_15	1	2399037	2419037
Breast_SE_716_4	2	70288842	70308842	5.16782	5.14205	5.47939	5.61738	4.97697	2.6271	2.67975	2.58308	1.64161	2.35257	2.53996	2.50364	2.63931	2.54674	2.54043	2.41695			Breast_SE_3_16	1	2419037	2439037
Breast_SE_607_1	2	24069907	24089907	4.89233	4.99425	5.02167	4.66097	4.46367	2.45377	2.51956	2.29605	1.55048	2.43725	2.57243	2.6246	2.5787	1.85825	2.31386	2.14692			Breast_SE_3_17	1	2439037	2459037
Breast_SE_5082_6	19	40421294	40441294	6.15387	6.16403	5.8741	5.88128	5.70368	2.94405	2.90254	2.76477	2.48547	2.69918	2.79461	2.52541	2.90808	2.71202	2.84166	2.64358			Breast_SE_3_18	1	2459037	2479037
Breast_SE_2942_2	9	70405208	70425208	5.7871	7.13138	7.25437	5.90093	6.7261	2.7975	2.73359	2.94523	2.68636	2.84248	2.91834	2.54344	2.97952	2.95266	2.72451	2.77515			Breast_SE_3_19	1	2479037	2499037
Breast_SE_4545_3	16	68255175	68275175	5.94265	5.3875	5.35654	5.47334	5.7824	2.55075	2.82384	2.63357	2.15837	2.71562	2.61773	2.51764	2.68757	2.50371	2.61636	2.52142			Breast_SE_3_20	1	2499037	2519037
Breast_SE_5197_5	20	31588369	31608369	8.74095	7.42669	7.17529	8.16111	7.66623	3.23544	3.14675	2.91853	2.81491	3.06001	2.83572	3.06998	2.92903	2.56794	2.68593	2.70045			Breast_SE_3_21	1	2519037	2539037
Breast_SE_5077_12	19	38824012	38844012	6.47787	6.3413	6.98562	6.01381	4.94629	2.72027	2.55271	2.56111	1.81833	2.94496	2.45688	2.51056	2.72164	2.13239	2.67221	2.68782			Breast_SE_3_22	1	2539037	2559037
Breast_SE_5262_10	20	47339649	47359649	6.8758	6.41354	6.25671	6.9285	6.16311	3.16972	3.03638	2.98124	2.32694	3.13542	2.83444	2.83968	3.11221	2.67347	2.82459	2.79365			Breast_SE_3_23	1	2559037	2579037
Breast_SE_1973_2	6	26026833	26046833	7.04143	6.56816	6.96648	7.03684	5.44078	3.05773	2.8304	2.90905	2.27411	2.90203	2.9374	2.91761	2.97817	2.37217	2.68538	2.9215			Breast_SE_3_24	1	2579037	2599037
Breast_SE_1991_5	6	32956165	32976165	7.05024	6.87091	7.1504	6.69872	6.23065	3.03578	3.0128	3.04556	2.7765	3.04004	3.0085	2.98804	3.07253	2.90701	2.91453	2.81489			Breast_SE_3_25	1	2599037	2619037
Breast_SE_4738_5	17	44061634	44081634	5.63497	4.44399	4.98297	4.45253	4.78618	2.62977	2.63636	2.62163	1.69465	2.38606	2.5373	2.45803	2.66752	2.30611	2.41063	2.56613			Breast_SE_4_1	1	3052991	3072991
Breast_SE_3924_37	12	124901844	124921844	6.29364	6.49647	7.08903	6.12116	6.25796	2.83024	2.74547	2.84469	2.54628	2.86903	2.77244	2.68776	2.94784	2.79481	2.47261	2.78533			Breast_SE_4_2	1	3072991	3092991
Breast_SE_3782_5	12	56146740	56166740	5.75691	4.80853	5.71151	5.55517	5.3316	2.81317	2.78552	2.64878	1.88463	2.15487	2.65518	2.46177	2.75247	2.40162	2.34447	2.40042			Breast_SE_4_3	1	3092991	3112991
Breast_SE_3400_1	11	9347771	9367771	5.18242	5.20502	6.11697	4.73229	5.04596	2.54196	2.43387	2.50785	1.54297	2.82003	2.31822	2.40264	2.5624	2.01751	2.36829	2.55877			Breast_SE_4_4	1	3112991	3132991
Breast_SE_2031_1	6	42736484	42756484	5.00375	5.1247	5.32261	5.09336	4.64618	2.74661	2.71493	2.70748	1.63643	2.40232	2.7304	2.65098	2.84146	2.17803	2.44369	2.25901			Breast_SE_4_5	1	3132991	3152991
Breast_SE_65_12	1	23543551	23563551	6.79509	6.57813	6.64857	6.82068	7.1192	3.17586	3.07623	2.97301	2.5784	2.89639	3.0059	3.00328	2.42739	1.68328	2.7139	2.75838			Breast_SE_4_6	1	3152991	3172991
Breast_SE_5096_9	19	44729879	44749879	6.79658	6.18165	6.3585	5.89574	6.62824	3.06157	2.69191	2.95322	2.55984	2.87795	3.00547	2.64619	2.90141	2.90041	2.99726	2.8118			Breast_SE_4_7	1	3172991	3192991
Breast_SE_5280_3	20	53579400	53599400	6.46882	6.69244	7.24076	6.0139	6.08926	3.20021	2.95608	3.02246	2.68987	2.90493	2.88091	2.93042	2.93812	2.95243	2.78031	2.92315			Breast_SE_4_8	1	3192991	3212991
Breast_SE_1973_8	6	26146833	26166833	5.85004	5.71713	6.53427	5.84922	4.88686	2.78888	2.76824	2.61114	1.61743	2.85485	2.77679	2.76358	2.7575	1.91782	2.54868	2.61117			Breast_SE_4_9	1	3212991	3232991
Breast_SE_1109_18	3	52268126	52288126	5.45749	5.73726	5.43508	5.87843	5.12573	2.85062	3.0733	2.84727	1.78069	2.18913	2.83527	2.5014	2.81268	2.49167	2.4533	2.59678			Breast_SE_4_10	1	3232991	3252991
Breast_SE_297_4	1	150560581	150580581	6.9187	6.40083	7.87601	6.41638	6.25555	3.06034	2.9103	2.98783	2.51593	3.08998	2.86255	2.99168	3.03147	2.98097	2.98763	2.93741			Breast_SE_4_11	1	3252991	3272991
Breast_SE_152_1	1	50950671	50970671	5.58071	5.84068	6.2402	5.60941	5.00337	2.9231	2.76932	2.85325	2.19445	2.44064	2.81428	2.65946	2.68194	2.69002	2.57337	2.42736			Breast_SE_4_12	1	3272991	3292991
Breast_SE_2030_1	6	42736247	42756247	5.01921	5.12206	5.32045	5.08701	4.63825	2.74681	2.71422	2.70799	1.62075	2.4004	2.72889	2.65167	2.84165	2.17987	2.43758	2.26053			Breast_SE_4_13	1	3292991	3312991
Breast_SE_5017_7	19	12779018	12799018	7.60117	7.89015	7.82484	6.53132	7.36623	3.18225	2.96903	3.26195	3.04384	2.92136	3.0976	3.06397	3.03591	3.23029	3.19273	2.8342			Breast_SE_4_14	1	3312991	3332991
Breast_SE_5064_4	19	35740416	35760416	6.34758	5.69556	6.14475	5.71008	5.6463	2.95317	2.93463	2.94904	2.25976	2.07774	2.95031	2.86654	2.86874	2.65991	2.71536	2.64617			Breast_SE_4_15	1	3332991	3352991
Breast_SE_4778_1	17	59614303	59634303	5.87775	5.64892	6.14589	5.51274	5.00874	2.72574	2.63625	2.66952	1.56094	2.59192	2.64235	2.7588	2.7638	2.3712	2.22112	2.68113			Breast_SE_4_16	1	3352991	3372991
Breast_SE_324_6	1	156737984	156757984	7.33492	6.59549	6.98794	6.76078	6.38872	3.13547	3.05875	3.05421	2.71528	2.9692	2.92975	2.96869	3.09539	3.06062	2.9407	2.83637			Breast_SE_4_17	1	3372991	3392991
Breast_SE_4409_7	15	92898427	92918427	6.10031	5.29031	6.47932	5.94734	6.65569	2.72295	2.69882	2.7367	1.62316	2.83978	2.53866	2.55023	2.77355	2.53765	2.55167	2.80712			Breast_SE_4_18	1	3392991	3412991
Breast_SE_4157_19	14	68792182	68812182	6.23369	6.62552	7.22151	6.29846	5.6884	2.91148	2.99812	3.0677	2.62694	2.70947	2.92012	2.97323	2.98305	2.83671	2.82187	2.72374			Breast_SE_5_1	1	3449793	3469793
Breast_SE_1099_2	3	49092908	49112908	5.22413	5.83841	5.58363	5.51507	5.69933	2.83439	2.8057	2.85962	2.32026	2.15421	2.74469	2.54217	2.75326	2.67338	2.61667	2.61389			Breast_SE_5_2	1	3469793	3489793
Breast_SE_5220_3	20	35733341	35753341	5.60766	5.97655	5.02084	5.6727	5.59578	2.82131	2.64492	2.73905	1.5834	2.1461	2.64628	2.68278	2.80008	2.36657	2.23111	2.63909			Breast_SE_5_3	1	3489793	3509793
Breast_SE_4337_2	15	68270353	68290353	6.12707	6.45644	6.19173	5.57557	4.94281	2.64519	2.53488	2.95391	2.20361	2.76711	2.73101	2.56171	2.64993	2.33366	2.52577	2.6496			Breast_SE_5_4	1	3509793	3529793
Breast_SE_4493_2	16	30048030	30068030	6.72475	6.98097	7.23539	5.62617	5.45955	3.05373	2.99314	3.03024	2.55331	2.69434	2.94257	2.83747	3.01167	2.81298	2.80787	2.93789			Breast_SE_5_5	1	3529793	3549793
Breast_SE_1809_4	5	138541028	138561028	5.85486	5.80036	5.92343	5.55884	5.25081	2.8627	2.76109	2.75185	1.33664	1.67322	2.65594	2.54528	2.79879	2.44192	2.53822	2.52875			Breast_SE_5_6	1	3549793	3569793
Breast_SE_1207_2	3	120091700	120111700	5.9463	6.24767	6.48348	5.62833	5.50394	2.84151	2.79423	2.7947	2.50644	2.72738	2.84188	2.72128	2.75421	2.80162	2.69634	2.63085			Breast_SE_5_7	1	3569793	3589793
Breast_SE_5097_20	19	45393827	45413827	6.77223	6.05245	5.70618	5.52573	5.93365	2.86304	2.71903	2.73005	2.50094	2.88101	2.91289	2.40234	2.89359	2.5448	2.78631	2.59705			Breast_SE_5_8	1	3589793	3609793
Breast_SE_2379_1	7	67294467	67314467	4.1977	4.59505	5.30696	4.42386	5.23131	2.51421	2.38501	2.54978	0.955499	2.04219	2.46727	2.25113	2.38367	2.08698	2.1528	2.2783			Breast_SE_5_9	1	3609793	3629793
Breast_SE_5224_1	20	35943711	35963711	5.45515	5.87324	5.39615	5.5458	5.12808	2.75196	2.68607	2.77208	1.2859	2.02816	2.6639	2.57668	2.79275	2.43475	2.45306	2.53126			Breast_SE_5_10	1	3629793	3649793
Breast_SE_2348_7	7	44841365	44861365	3.92199	4.8284	4.9781	4.46513	4.21063	2.55989	2.41252	2.41432	1.84079	2.21055	2.48334	2.51241	2.45273	2.09358	2.23944	2.23653			Breast_SE_5_11	1	3649793	3669793
Breast_SE_3300_3	10	100365452	100385452	4.65382	5.41944	5.69017	5.27767	5.75947	2.81912	2.7276	2.79492	1.9365	2.93513	2.48905	2.3283	2.94065	2.34236	2.51314	2.78448			Breast_SE_5_12	1	3669793	3689793
Breast_SE_2008_4	6	36587104	36607104	4.56515	5.11554	5.4927	5.19103	4.88841	2.67434	2.56747	2.64072	1.35689	2.59969	2.62055	2.54042	2.86355	1.91166	2.48015	2.56308			Breast_SE_5_13	1	3689793	3709793
Breast_SE_1282_5	3	157144554	157164554	5.98022	5.81133	6.02087	5.79872	5.57982	2.84096	2.77441	2.7938	2.48685	2.47939	2.75018	2.64497	2.713	2.5698	2.65236	2.34718			Breast_SE_5_14	1	3709793	3729793
Breast_SE_5225_1	20	35943585	35963585	5.45909	5.87324	5.39615	5.54659	5.12693	2.75196	2.68657	2.77208	1.27601	2.02816	2.66356	2.57668	2.79278	2.43612	2.45243	2.53168			Breast_SE_5_15	1	3729793	3749793
Breast_SE_5222_1	20	35938646	35958646	5.55811	5.88428	5.39663	5.53332	5.19113	2.75937	2.68954	2.7744	1.24716	2.04758	2.68414	2.58415	2.79104	2.43418	2.45457	2.57144			Breast_SE_6_1	1	6172309	6192309
Breast_SE_5019_8	19	13831094	13851094	7.3758	7.2463	7.17396	6.82828	7.95261	3.23747	3.11938	3.26244	2.98392	2.88963	3.14787	3.09492	3.17259	3.13275	3.13225	2.76063			Breast_SE_6_2	1	6192309	6212309
Breast_SE_3079_10	9	129485459	129505459	7.74728	7.64757	7.75975	6.86706	5.8031	3.28889	3.25506	3.16412	2.72499	2.95154	3.04662	3.10486	3.12261	3.16785	3.04447	2.91075			Breast_SE_6_3	1	6212309	6232309
Breast_SE_4876_13	18	3446544	3466544	6.36711	6.82108	7.33535	7.07242	6.14288	3.02911	3.04036	2.93238	2.78399	3.01396	3.02312	3.0006	3.06311	2.98468	3.01835	2.88574			Breast_SE_6_4	1	6232309	6252309
Breast_SE_1286_1	3	160393945	160413945	6.65271	5.52566	5.95951	4.95399	5.07485	2.88505	2.73217	2.81929	2.31863	2.3501	2.7971	2.69104	2.6838	2.53556	2.58715	2.63213			Breast_SE_6_5	1	6252309	6272309
Breast_SE_4810_2	17	63755965	63775965	5.57341	5.3217	5.86352	5.15287	4.71747	2.63126	2.60284	2.56304	2.01563	2.55585	2.53783	2.65047	2.68618	2.32694	2.30423	2.55024			Breast_SE_6_6	1	6272309	6292309
Breast_SE_3794_1	12	62599032	62619032	5.47694	5.70753	5.83386	5.8422	5.22095	2.93078	2.81906	2.83699	2.18035	2.10805	2.82119	2.71775	2.74859	2.36766	2.3569	2.30637			Breast_SE_6_7	1	6292309	6312309
Breast_SE_3548_1	11	83145397	83165397	5.76491	5.02905	5.40499	4.88329	4.51124	2.76306	2.57804	2.56049	1.98659	2.4912	2.58947	2.50839	2.73284	2.41125	2.46651	2.36635			Breast_SE_6_8	1	6312309	6332309
Breast_SE_5223_1	20	35944343	35964343	5.45753	5.87958	5.3971	5.5402	5.11004	2.75256	2.68504	2.77338	1.25418	2.02295	2.66518	2.57712	2.79261	2.43486	2.45052	2.52748			Breast_SE_6_9	1	6332309	6352309
Breast_SE_4557_3	16	70284920	70304920	5.10564	5.27152	5.09928	5.26674	5.60365	2.68205	2.80077	2.68447	1.98034	1.84061	2.6271	2.41896	2.72308	2.35367	2.31635	2.49146			Breast_SE_6_10	1	6352309	6372309
Breast_SE_606_2	2	23912694	23932694	5.30434	6.18527	6.05027	5.13625	4.34714	2.58627	2.72559	2.59748	1.89078	2.07655	2.65675	2.69523	2.54399	2.287	2.54085	2.43391			Breast_SE_6_11	1	6372309	6392309
Breast_SE_5095_11	19	43751999	43771999	6.45602	5.32326	5.61824	5.62044	6.13765	3.07391	2.67585	2.91461	1.6975	2.9416	2.96312	2.44106	3.00992	2.48822	2.87352	2.57785			Breast_SE_6_12	1	6392309	6412309
Breast_SE_2963_1	9	83697102	83717102	5.04955	5.76412	5.70752	5.52884	5.07934	2.7303	2.71365	2.68442	2.02913	2.0308	2.62066	2.60054	2.70976	2.67068	2.43298	2.39328			Breast_SE_6_13	1	6412309	6432309
Breast_SE_1353_8	3	194131113	194151113	6.61686	7.30357	8.26721	6.85155	6.21282	2.88001	2.8564	2.92317	2.90828	3.01425	2.91978	2.85152	2.75974	2.80335	2.85167	2.68426			Breast_SE_6_14	1	6432309	6452309
Breast_SE_1977_6	6	27889974	27909974	6.39828	5.44785	6.25455	5.92076	5.09936	2.87958	2.77122	2.84348	1.61702	2.87459	2.70349	2.80666	2.85202	2.16632	2.65009	2.75418			Breast_SE_6_15	1	6452309	6472309
Breast_SE_1335_2	3	186767103	186787103	6.02141	5.03038	5.48235	5.58855	4.89129	2.68298	2.67826	2.5643	1.47566	2.46136	2.67342	2.55458	2.73826	2.05073	2.10997	2.5217			Breast_SE_6_16	1	6472309	6492309
Breast_SE_2962_1	9	83695403	83715403	5.0687	5.76869	5.71133	5.54712	5.06755	2.73078	2.71387	2.68729	2.03101	2.0204	2.62066	2.60257	2.71026	2.67005	2.43143	2.40182			Breast_SE_6_17	1	6492309	6512309
Breast_SE_5080_6	19	39393930	39413930	7.03987	7.47593	7.03789	8.0008	6.465	3.0994	2.99921	3.03172	2.86002	2.68456	3.06727	2.78653	3.07918	2.99965	3.07827	2.74923			Breast_SE_6_18	1	6512309	6532309
Breast_SE_615_3	2	27207226	27227226	5.8955	6.05146	6.63785	5.46675	5.10424	2.75879	2.77748	2.78505	2.50904	2.64043	2.80097	2.64419	2.65387	2.55255	2.74209	2.58775			Breast_SE_7_1	1	6573178	6593178
Breast_SE_3782_3	12	56106740	56126740	5.15089	5.33698	5.9239	5.56394	5.23775	2.69182	2.62163	2.52518	0.814061	2.52988	2.47465	2.29831	2.64352	2.01285	2.28057	2.5			Breast_SE_7_2	1	6593178	6613178
Breast_SE_2717_1	8	89749668	89769668	5.63595	6.01333	5.80323	5.02272	4.28967	2.7171	2.74513	2.6362	1.76934	2.43003	2.68952	2.48762	2.57258	2.22736	2.30483	2.12144			Breast_SE_7_3	1	6613178	6633178
Breast_SE_5077_3	19	38644012	38664012	6.89446	5.43397	5.59818	5.08404	6.07646	3.142	2.98935	2.79976	2.2411	2.93944	2.98239	2.94702	3.11671	2.70168	2.93273	2.78967			Breast_SE_7_4	1	6633178	6653178
Breast_SE_5083_8	19	40698055	40718055	5.55136	5.72696	5.82501	5.3563	5.84041	2.78943	2.76401	2.70629	2.41682	2.71468	2.69081	2.30921	2.70883	2.58968	2.72382	2.25204			Breast_SE_8_1	1	7240099	7260099
Breast_SE_715_2	2	70080471	70100471	6.1396	6.75391	6.817	6.45081	5.86323	2.89119	2.86967	2.90644	2.71642	2.7579	2.90567	2.88775	2.83824	2.89075	2.71981	2.7497			Breast_SE_8_2	1	7260099	7280099
Breast_SE_4661_3	17	17691589	17711589	6.05647	7.08462	6.80534	6.15673	5.7281	2.96272	2.88207	2.94449	2.74936	2.87263	2.84344	2.89336	2.88361	2.74335	2.90276	2.67303			Breast_SE_8_3	1	7280099	7300099
Breast_SE_5196_1	20	25618318	25638318	5.7133	5.67503	5.00276	5.47655	4.96268	2.87932	2.70272	2.71114	1.8753	2.10769	2.73389	2.61506	2.74618	2.28334	2.49564	2.13588			Breast_SE_8_4	1	7300099	7320099
Breast_SE_5587_4	X	154381666	154401666	4.98998	5.7573	6.19714	5.84048	4.72377	2.88666	2.64799	2.7584	1.96667	2.42937	2.56942	2.5277	2.69859	2.67226	2.64569	2.57369			Breast_SE_9_1	1	7364340	7384340
Breast_SE_4661_10	17	17831589	17851589	5.96957	7.69637	6.50951	6.30567	6.5496	3.00272	3.02194	3.06594	2.85767	2.99623	2.85435	2.88641	3.00464	2.85701	2.93805	2.71625			Breast_SE_9_2	1	7384340	7404340
Breast_SE_4350_1	15	72460348	72480348	5.38703	6.04856	5.77395	5.40619	5.17974	2.61749	2.68836	2.79799	2.32392	1.97854	2.52353	2.48371	2.58535	2.42366	2.28225	2.45129			Breast_SE_9_3	1	7404340	7424340
Breast_SE_1010_2	3	9390989	9410989	6.28725	6.20049	5.75275	6.19411	6.18491	2.93288	2.77026	2.84017	2.42989	2.57404	2.78065	2.80773	2.81038	2.8073	2.50982	2.56557			Breast_SE_9_4	1	7424340	7444340
Breast_SE_4110_1	14	49761112	49781112	5.53578	5.7769	5.54859	6.17576	4.88837	2.59188	2.73775	2.69943	1.86962	2.6195	2.60192	2.55309	2.75874	2.09882	2.15014	2.42738			Breast_SE_9_5	1	7444340	7464340
Breast_SE_217_1	1	91009754	91029754	5.94333	4.74982	5.22498	4.65572	5.35676	2.56213	2.59014	2.61924	1.91666	2.35021	2.5126	2.31359	2.53117	2.40163	2.42528	1.93977			Breast_SE_9_6	1	7464340	7484340
Breast_SE_1094_1	3	48283708	48303708	4.33311	4.55706	4.61922	4.74357	4.58788	2.62741	2.52989	2.54672	1.78676	2.10677	2.53453	2.10381	2.59166	2.2657	2.32053	2.4041			Breast_SE_9_7	1	7484340	7504340
Breast_SE_530_8	1	234591791	234611791	6.95711	7.51744	7.52934	6.90627	5.99244	3.09171	3.02259	3.11114	2.95189	3.07173	2.89652	2.98022	2.90751	2.87793	2.89786	2.9085			Breast_SE_9_8	1	7504340	7524340
Breast_SE_617_1	2	27397267	27417267	4.45389	4.7419	4.849	4.2795	4.48619	2.46077	2.53631	2.48498	1.32925	1.49736	2.3799	2.31082	2.43315	2.02473	2.3519	2.28988			Breast_SE_9_9	1	7524340	7544340
Breast_SE_5191_1	20	23338023	23358023	5.48899	5.36789	5.23131	4.74723	5.07897	2.86971	2.70065	2.80527	2.07141	2.16478	2.7424	2.54654	2.85022	2.30248	2.49174	2.13882			Breast_SE_9_10	1	7544340	7564340
Breast_SE_3125_4	10	3770224	3790224	6.30838	6.18602	6.77698	6.13932	6.35814	3.11652	2.73484	2.91933	2.69362	2.68913	2.93692	2.97471	3.06624	2.72051	2.7436	2.43936			Breast_SE_10_1	1	7939281	7959281
Breast_SE_1100_9	3	49469048	49489048	4.88099	4.9665	4.59462	4.45522	4.86265	2.64037	2.78606	2.77488	1.71684	2.57639	2.5123	2.34516	2.64783	2.30014	2.48469	2.48942			Breast_SE_10_2	1	7959281	7979281
Breast_SE_835_2	2	159605574	159625574	5.167	4.45253	5.04647	4.90568	5.15083	2.51128	2.41018	2.34323	1.41846	2.2667	2.2185	2.4257	2.46506	2.2462	2.14647	2.51601			Breast_SE_10_3	1	7979281	7999281
Breast_SE_5455_6	22	41269976	41289976	4.84521	5.10269	5.37464	4.72585	4.43147	2.69363	2.71668	2.65824	1.97011	2.71862	2.74506	2.42752	2.7727	2.36672	2.49948	2.42231			Breast_SE_10_4	1	7999281	8019281
Breast_SE_5127_5	19	54431039	54451039	5.60659	5.77632	6.3366	5.14476	5.55251	2.80483	2.67346	2.6237	2.52024	2.30343	2.67317	2.64557	2.74636	2.62345	2.65131	2.57946			Breast_SE_10_5	1	8019281	8039281
Breast_SE_1272_7	3	150404514	150424514	7.7032	6.23607	6.60097	5.68899	5.66072	3.05364	2.90299	3.01403	2.63469	2.28566	2.94836	2.97762	2.82702	2.66321	2.70749	2.66906			Breast_SE_10_6	1	8039281	8059281
Breast_SE_2076_2	6	73518659	73538659	6.51203	5.75029	5.49874	6.21087	5.86807	2.89827	2.88361	2.83742	2.2128	2.52491	2.75211	2.83604	3.01395	2.73607	2.70375	2.58279			Breast_SE_10_7	1	8059281	8079281
Breast_SE_2130_3	6	109363564	109383564	5.02807	5.98429	5.75077	5.33217	5.12923	2.73812	2.68545	2.74791	2.34071	2.46195	2.53398	2.46377	2.60441	2.64474	2.45216	2.54703			Breast_SE_10_8	1	8079281	8099281
Breast_SE_611_4	2	26014957	26034957	4.94505	5.98927	5.60262	5.92588	4.8811	2.56187	2.62926	2.75472	2.24593	2.37448	2.53655	2.51886	2.57825	2.41734	2.42091	2.4061			Breast_SE_10_9	1	8099281	8119281
Breast_SE_2348_4	7	44781365	44801365	5.14055	5.77559	6.06265	5.57149	5.66778	2.80205	2.75709	2.81321	2.56207	2.55889	2.69599	2.69857	2.70234	2.66005	2.80018	2.46018			Breast_SE_10_10	1	8119281	8139281
Breast_SE_1809_5	5	138561028	138581028	5.45986	5.24325	5.4986	5.32632	5.12363	2.83639	2.74423	2.72769	1.21544	2.17594	2.66414	2.71143	2.74476	2.28224	2.34766	2.53108			Breast_SE_10_11	1	8139281	8159281
Breast_SE_3226_1	10	58264513	58284513	5.98029	5.25896	5.63516	5.50028	5.45864	2.73473	2.62592	2.77115	2.25248	2.40791	2.56642	2.53021	2.70706	2.52513	2.48153	2.2073			Breast_SE_10_12	1	8159281	8179281
Breast_SE_2915_11	9	33273892	33293892	4.74912	5.2957	5.68796	5.24159	5.58221	2.86428	2.62041	2.72236	2.16419	2.17619	2.52481	2.36585	2.69651	2.7052	2.46403	2.30736			Breast_SE_10_13	1	8179281	8199281
Breast_SE_563_4	1	248854037	248874037	5.44514	5.50644	6.08765	5.31975	4.64076	2.62949	2.74677	2.85452	1.78535	2.43766	2.57193	2.72701	2.70014	2.56213	2.58288	2.71049			Breast_SE_10_14	1	8199281	8219281
Breast_SE_3407_1	11	10798401	10818401	5.01361	5.13314	5.80434	4.83467	4.6628	2.73147	2.80126	2.76751	1.73931	2.05692	2.71259	2.68051	2.79237	2.43752	2.44098	2.45035			Breast_SE_10_15	1	8219281	8239281
Breast_SE_3426_2	11	18381938	18401938	5.83762	5.03033	5.41649	5.1083	5.25144	2.93168	2.73015	2.81637	2.16746	2.66026	2.84795	2.78029	2.93654	2.35511	2.48773	2.3896			Breast_SE_10_16	1	8239281	8259281
Breast_SE_3406_1	11	10798319	10818319	5.01536	5.13183	5.80441	4.83439	4.66127	2.73169	2.80126	2.76806	1.73119	2.05743	2.71234	2.68051	2.79254	2.43752	2.44175	2.45007			Breast_SE_10_17	1	8259281	8279281
Breast_SE_3405_1	11	10797800	10817800	5.01536	5.12415	5.80308	4.8391	4.6566	2.73121	2.80094	2.76865	1.72293	2.06159	2.71265	2.68142	2.79163	2.43829	2.44508	2.45058			Breast_SE_11_1	1	8337266	8357266
Breast_SE_427_20	1	204397402	204417402	5.65677	5.16919	5.74112	5.37245	5.28652	2.82938	2.56568	2.75713	2.14866	2.34366	2.53258	2.61552	2.72571	2.59631	2.52071	2.76449			Breast_SE_11_2	1	8357266	8377266
Breast_SE_1505_2	4	102817680	102837680	6.27584	5.86658	6.24374	5.5355	5.61319	2.83971	2.75962	2.89744	2.53792	2.65889	2.70575	2.62954	2.86381	2.72084	2.63136	2.49521			Breast_SE_11_3	1	8377266	8397266
Breast_SE_2718_1	8	89892597	89912597	5.24089	5.28694	5.2187	6.35103	4.87643	2.3981	2.68337	2.45507	2.04334	2.11421	2.45673	2.07438	2.21778	2.21118	2.28963	2.21989			Breast_SE_11_4	1	8397266	8417266
Breast_SE_964_7	2	231704707	231724707	6.85968	7.07503	6.93067	6.43781	6.00772	3.03375	3.08992	3.09437	2.88093	2.31208	2.98749	3.0179	2.96901	2.87103	2.89562	2.76258			Breast_SE_11_5	1	8417266	8437266
Breast_SE_1506_1	4	102817337	102837337	6.27708	5.86579	6.24378	5.53356	5.61721	2.83985	2.75943	2.89779	2.5392	2.65998	2.70687	2.63099	2.8644	2.72162	2.63136	2.49474			Breast_SE_11_6	1	8437266	8457266
Breast_SE_378_1	1	180490030	180510030	4.89906	5.13519	5.57792	4.46596	5.32817	2.55238	2.59373	2.65208	2.14303	1.75682	2.42152	2.34347	2.51228	2.2005	2.25133	2.49447			Breast_SE_11_7	1	8457266	8477266
Breast_SE_3689_2	12	14765676	14785676	5.09795	5.87618	5.84816	5.0813	5.18506	2.76681	2.58399	2.98423	1.90731	2.53105	2.43173	2.6023	2.88012	2.57979	2.40103	2.78809			Breast_SE_11_8	1	8477266	8497266
Breast_SE_252_2	1	112613220	112633220	6.00205	5.30806	5.2255	5.54832	6.09292	2.80951	2.66501	2.63415	1.21611	2.47282	2.69545	2.48111	2.76151	2.56441	2.34903	2.44742			Breast_SE_11_9	1	8497266	8517266
Breast_SE_36_9	1	15826394	15846394	6.12778	5.9505	6.10924	5.3998	5.98394	2.8351	2.84319	2.91412	2.62219	2.86563	2.86446	2.77162	2.80186	2.70543	2.74623	2.56513			Breast_SE_11_10	1	8517266	8537266
Breast_SE_1973_14	6	26266833	26286833	6.7669	6.47141	7.09573	5.88479	5.35278	2.79708	2.08261	2.58663	2.10536	2.93421	2.66174	2.81079	2.55317	2.56296	2.6602	2.51707			Breast_SE_11_11	1	8537266	8557266
Breast_SE_574_4	2	8675661	8695661	5.06577	7.58634	7.61513	6.36297	5.41718	2.88731	2.9159	2.2028	2.50362	2.50604	2.76518	2.77297	1.02512	1.78129	2.07424	2.7763			Breast_SE_11_12	1	8557266	8577266
Breast_SE_5178_4	20	17559803	17579803	6.56651	6.19794	6.63938	4.89374	6.07228	2.92807	2.82469	2.84392	2.62716	2.65083	2.93114	2.82154	2.96404	2.62129	2.81989	2.45516			Breast_SE_12_1	1	8836971	8856971
Breast_SE_4992_3	19	3979971	3999971	4.55758	5.36931	5.44636	5.59522	4.32964	2.84711	2.83922	2.6629	1.85921	2.19383	2.7028	2.379	2.62568	2.3073	2.48261	2.62732			Breast_SE_12_2	1	8856971	8876971
Breast_SE_1973_3	6	26046833	26066833	6.12549	5.14165	6.43904	6.13407	5.1981	2.81105	2.69296	2.78968	2.06215	2.83105	2.77944	2.75551	2.79348	2.11025	2.43881	2.6744			Breast_SE_12_3	1	8876971	8896971
Breast_SE_113_16	1	36380028	36400028	5.16134	6.10926	6.33631	5.80181	5.11772	2.84528	2.81182	2.77905	2.39168	2.33584	2.77343	2.56273	2.76157	2.7716	2.6537	2.26533			Breast_SE_12_4	1	8896971	8916971
Breast_SE_4998_7	19	5889051	5909051	4.15316	5.29505	4.66708	5.22643	4.48844	2.6088	2.78056	2.4807	1.85065	1.8283	2.53876	2.42904	2.54799	1.68807	2.41506	2.36002			Breast_SE_12_5	1	8916971	8936971
Breast_SE_123_1	1	40689935	40709935	5.49832	4.75026	4.85615	4.67189	4.66564	2.62553	2.66468	2.67415	1.80137	2.36378	2.49402	2.40586	2.59162	2.52138	2.67864	2.16942			Breast_SE_12_6	1	8936971	8956971
Breast_SE_4986_41	19	1252244	1272244	7.1694	7.66037	7.28748	6.59753	6.67198	3.19801	3.22855	3.08024	3.15017	2.58171	3.13354	2.955	3.1173	3.2075	3.13351	2.74676			Breast_SE_12_7	1	8956971	8976971
Breast_SE_2492_1	7	139331186	139351186	5.09279	5.1928	5.92095	5.31005	4.74688	2.65153	2.56275	2.74897	1.28388	2.42369	2.56135	2.64621	2.63704	2.38345	2.25952	2.42042			Breast_SE_12_8	1	8976971	8996971
Breast_SE_2492_2	7	139351186	139371186	6.06778	5.87125	6.23179	5.47825	5.21175	2.81823	2.81872	2.90547	2.41324	2.45274	2.77191	2.77426	2.80606	2.73104	2.52713	2.54931			Breast_SE_13_1	1	9031476	9051476
Breast_SE_984_4	2	238271027	238291027	5.14264	6.74049	6.19644	5.47411	5.68722	1.57199	2.3699	2.60599	2.11873	2.60675	2.19057	1.97308	2.13458	1.13566	2.56653	2.66356			Breast_SE_13_2	1	9051476	9071476
Breast_SE_2494_1	7	139354450	139374450	6.06901	5.86615	6.23384	5.4903	5.2044	2.82015	2.81617	2.90556	2.41046	2.45177	2.77557	2.77636	2.80633	2.73513	2.52992	2.55556			Breast_SE_13_3	1	9071476	9091476
Breast_SE_3342_2	10	119077656	119097656	4.42003	5.50413	5.39076	5.40825	4.98353	2.54359	2.64428	2.59534	2.31488	2.21062	2.55919	2.39521	2.76463	2.40068	2.43957	2.53242			Breast_SE_13_4	1	9091476	9111476
Breast_SE_2493_1	7	139349458	139369458	6.05364	5.87545	6.23529	5.47889	5.20466	2.81695	2.81677	2.90656	2.41569	2.45245	2.77111	2.7751	2.80364	2.72568	2.5255	2.54773			Breast_SE_13_5	1	9111476	9131476
Breast_SE_3907_12	12	120274698	120294698	5.09685	4.74096	5.74383	5.17603	4.63138	2.30152	2.33193	2.37112	1.65397	2.56289	2.32623	2.42076	2.59391	2.14223	2.1785	2.52375			Breast_SE_13_6	1	9131476	9151476
Breast_SE_3210_5	10	43405305	43425305	6.53559	6.65205	6.49027	6.55299	6.13661	3.02479	2.90054	3.10502	2.73991	2.35312	2.75974	2.73863	2.9374	2.96107	2.91072	2.69026			Breast_SE_13_7	1	9151476	9171476
Breast_SE_1093_2	3	47774638	47794638	4.55834	5.39374	5.15084	5.11909	5.34561	2.63219	2.63058	2.6486	2.26192	2.10499	2.52428	2.36291	2.57863	2.49875	2.3356	2.52147			Breast_SE_13_8	1	9171476	9191476
Breast_SE_2041_6	6	44245263	44265263	5.99322	6.24524	6.55301	6.10889	5.19212	2.86057	2.9455	2.94957	2.48831	2.33435	2.85531	2.79021	3.02637	2.77321	2.78091	2.6496			Breast_SE_13_9	1	9191476	9211476
Breast_SE_4726_6	17	41671789	41691789	4.62674	4.77115	5.03144	5.10268	4.94771	2.54735	2.68904	2.64299	2.04131	2.60486	2.58989	2.42149	2.76246	2.18621	2.31122	2.26632			Breast_SE_14_1	1	9230702	9250702
Breast_SE_3745_3	12	46378575	46398575	5.16437	5.25393	5.83858	4.90711	5.01982	2.8084	2.68108	2.66805	2.34002	2.73828	2.77891	2.57708	2.80596	2.51663	2.55533	2.51668			Breast_SE_14_2	1	9250702	9270702
Breast_SE_4853_21	17	75773708	75793708	6.13651	6.62784	6.9025	5.99326	5.40537	2.79005	2.85192	2.92373	2.66362	2.74342	2.81093	2.89489	2.87388	2.80001	2.83995	2.72666			Breast_SE_14_3	1	9270702	9290702
Breast_SE_316_4	1	154956696	154976696	7.20946	5.97013	6.68586	7.15882	6.90572	3.14092	2.99872	3.02724	2.58697	3.04918	2.93594	2.93907	3.09395	2.98796	2.88305	2.82991			Breast_SE_14_4	1	9290702	9310702
Breast_SE_2491_1	7	139330930	139350930	5.08961	5.18787	5.92169	5.31345	4.7308	2.65027	2.56323	2.74825	1.26237	2.42369	2.56086	2.64724	2.63704	2.38096	2.25469	2.41767			Breast_SE_14_5	1	9310702	9330702
Breast_SE_313_4	1	154216503	154236503	5.29764	5.47521	5.37444	5.42737	5.18881	2.75813	2.6707	2.69585	2.13456	2.01191	2.55545	2.54236	2.73329	2.64827	2.53055	2.59035			Breast_SE_14_6	1	9330702	9350702
Breast_SE_4762_6	17	50713422	50733422	4.75005	4.899	5.87895	4.83997	4.27753	2.43198	2.5199	2.46789	1.88843	2.02823	2.36506	2.27254	2.59304	2.31024	2.35257	2.53027			Breast_SE_14_7	1	9350702	9370702
Breast_SE_3773_18	12	53492566	53512566	5.95219	5.37165	5.45454	5.05198	5.02334	2.90382	2.83537	2.81965	2.05205	2.07687	2.8535	2.67182	2.70517	2.65142	2.54465	2.61252			Breast_SE_14_8	1	9370702	9390702
Breast_SE_4857_20	17	76721147	76741147	6.72862	6.76161	7.01765	6.36785	5.60569	2.95093	2.97424	3.04432	2.76737	2.36347	2.88993	2.98889	2.97473	2.83639	2.893	2.83807			Breast_SE_14_9	1	9390702	9410702
Breast_SE_4127_2	14	55036608	55056608	5.61425	5.30764	5.3598	4.98061	4.67198	2.60561	2.58891	2.57587	2.057	2.0309	2.4307	2.36863	2.63866	2.39738	2.28739	2.04144			Breast_SE_14_10	1	9410702	9430702
Breast_SE_4405_7	15	90925595	90945595	5.39872	5.33696	5.40171	5.11872	4.7987	2.52693	2.6331	2.70169	1.97399	1.89631	2.5481	2.27546	2.63636	2.55762	2.33974	2.58815			Breast_SE_14_11	1	9430702	9450702
Breast_SE_5017_2	19	12679018	12699018	4.23436	5.14707	5.21043	4.61601	4.95361	2.66803	2.61758	2.64264	1.22823	1.80376	2.54699	2.56492	2.57527	2.39547	2.55378	2.26885			Breast_SE_14_12	1	9450702	9470702
Breast_SE_2717_8	8	89889668	89909668	5.33181	5.2939	5.2283	6.51856	4.91925	2.39825	2.69424	2.4899	2.05668	2.22537	2.47556	2.04121	2.23664	2.21974	2.31322	2.24537			Breast_SE_14_13	1	9470702	9490702
Breast_SE_1805_1	5	137743811	137763811	6.16016	6.04881	5.64758	5.59905	4.88142	2.8762	2.88128	2.82325	2.07137	1.89383	2.7928	2.73818	2.78077	2.49606	2.46767	2.37452			Breast_SE_14_14	1	9490702	9510702
Breast_SE_1804_1	5	137743806	137763806	6.16016	6.04881	5.64758	5.59905	4.88142	2.8762	2.88128	2.82325	2.07137	1.89383	2.7928	2.73818	2.78077	2.49606	2.46767	2.37417			Breast_SE_14_15	1	9510702	9530702
Breast_SE_2802_4	8	123384229	123404229	5.70012	5.28632	5.38976	5.27052	4.68257	2.76144	2.67867	2.77987	1.99935	2.08513	2.66168	2.66856	2.55831	2.45012	2.35985	2.32131			Breast_SE_14_16	1	9530702	9550702
Breast_SE_136_4	1	44771726	44791726	5.6488	4.76385	5.33156	5.69949	4.90571	2.7831	2.7599	2.66113	1.77422	1.88261	2.66199	2.45392	2.63493	2.3785	2.58078	2.4214			Breast_SE_14_17	1	9550702	9570702
Breast_SE_1803_1	5	137743871	137763871	6.16094	6.04811	5.64758	5.59888	4.87744	2.8762	2.88142	2.82325	2.06961	1.89383	2.793	2.73818	2.78095	2.49601	2.46697	2.37494			Breast_SE_15_1	1	9676872	9696872
Breast_SE_4109_4	14	49625596	49645596	5.91366	6.11281	5.60287	6.16809	5.32638	2.80504	2.82437	2.86324	2.37473	2.12226	2.64703	2.61712	2.8841	2.54297	2.56315	2.43205			Breast_SE_15_2	1	9696872	9716872
Breast_SE_1802_3	5	137742380	137762380	6.14917	6.04091	5.64909	5.6046	4.88281	2.87588	2.88126	2.82398	2.0642	1.88713	2.78985	2.73867	2.78165	2.49903	2.46487	2.37287			Breast_SE_15_3	1	9716872	9736872
Breast_SE_4105_1	14	39257538	39277538	5.78747	5.33971	5.49168	5.59221	4.56641	2.66558	2.70343	2.72769	2.06707	2.50138	2.60696	2.51617	2.69915	2.40309	2.36182	2.4036			Breast_SE_15_4	1	9736872	9756872
Breast_SE_3568_1	11	95780602	95800602	5.35679	5.51826	5.81762	5.44891	5.2278	2.74445	2.72625	2.67055	2.31942	2.07984	2.68477	2.50563	2.73369	2.51721	2.44774	2.08156			Breast_SE_15_5	1	9756872	9776872
Breast_SE_1806_1	5	137747465	137767465	6.16464	6.05268	5.65648	5.56969	4.86558	2.87499	2.88088	2.82543	2.06945	1.8866	2.79365	2.73818	2.78354	2.49252	2.46757	2.37234			Breast_SE_15_6	1	9776872	9796872
Breast_SE_2744_2	8	100292584	100312584	5.61748	6.69229	5.87837	5.43731	5.02694	2.72973	2.50474	2.57493	2.46836	2.55503	2.64254	2.59721	2.65729	2.4365	2.62077	2.28436			Breast_SE_15_7	1	9796872	9816872
Breast_SE_5152_5	20	3801332	3821332	7.22028	5.86425	6.30114	5.83957	6.64707	3.19479	2.86941	3.06139	2.5717	2.93996	3.01714	3.07737	3.09021	2.90293	2.90792	2.58361			Breast_SE_15_8	1	9816872	9836872
Breast_SE_3742_1	12	45980804	46000804	5.14297	5.65955	5.67897	5.54618	4.80419	2.65963	2.68539	2.74861	2.26132	2.25976	2.64994	2.60191	2.73616	2.529	2.46921	2.33291			Breast_SE_15_9	1	9836872	9856872
Breast_SE_3741_1	12	45978664	45998664	5.16128	5.64776	5.68145	5.54592	4.81944	2.66322	2.68305	2.74714	2.2576	2.24793	2.64735	2.59987	2.73766	2.5366	2.45941	2.33034			Breast_SE_15_10	1	9856872	9876872
Breast_SE_4106_1	14	39256763	39276763	5.76542	5.32849	5.48905	5.59221	4.55321	2.66433	2.70219	2.72587	2.06163	2.50359	2.60742	2.51781	2.69818	2.39995	2.35313	2.40182			Breast_SE_15_11	1	9876872	9896872
Breast_SE_3743_1	12	45980894	46000894	5.14297	5.65955	5.6798	5.54636	4.80419	2.65963	2.68539	2.74881	2.26335	2.26125	2.64994	2.60231	2.7359	2.529	2.46921	2.33258			Breast_SE_15_12	1	9896872	9916872
Breast_SE_1688_1	5	57165955	57185955	5.71235	5.32698	5.58738	5.22132	4.8806	2.70024	2.65087	2.64983	2.26685	2.19132	2.57448	2.45367	2.81286	2.54425	2.5499	2.38583			Breast_SE_16_1	1	9992695	10012695
Breast_SE_4526_21	16	57181590	57201590	5.72703	4.63793	4.82583	4.64024	4.58957	2.70869	2.54359	2.61934	1.57035	2.12024	2.59352	2.38091	2.70958	2.44698	2.45216	2.39011			Breast_SE_16_2	1	10012695	10032695
Breast_SE_72_1	1	24634959	24654959	4.94093	5.21818	5.16979	4.29677	4.8789	2.83074	2.65987	2.80366	2.04232	2.21089	2.69413	2.51745	2.71158	2.51383	2.62798	2.33958			Breast_SE_16_3	1	10032695	10052695
Breast_SE_4109_2	14	49585596	49605596	6.48696	5.70128	5.91213	5.91217	4.86999	2.76152	2.71854	2.86503	2.29647	2.33317	2.68604	2.55106	2.88444	2.54187	2.48241	2.53321			Breast_SE_16_4	1	10052695	10072695
Breast_SE_5198_5	20	31720677	31740677	7.08782	6.23812	6.24918	6.22791	6.01968	2.94693	2.93915	2.8503	2.72323	2.54224	2.94875	2.88004	3.07591	2.90143	2.72193	2.6409			Breast_SE_16_5	1	10072695	10092695
Breast_SE_5440_3	22	38500957	38520957	5.22913	5.87135	5.43588	5.10487	5.34475	2.76814	2.83772	2.81297	2.28384	1.87094	2.75267	2.67783	2.52984	2.52293	2.55725	2.30675			Breast_SE_16_6	1	10092695	10112695
Breast_SE_5112_14	19	49654514	49674514	5.47351	4.35185	5.31286	4.98497	5.00629	2.7625	2.70773	2.54079	2.01226	2.11815	2.51774	2.1996	2.65327	2.40077	2.5833	2.33321			Breast_SE_17_1	1	10375556	10395556
Breast_SE_4545_2	16	68235175	68255175	5.60382	6.47306	6.71344	6.00165	5.00947	2.70808	2.91726	2.63458	2.64666	2.36455	2.64375	2.55329	2.6849	2.54507	2.81527	2.8345			Breast_SE_17_2	1	10395556	10415556
Breast_SE_4854_1	17	75965317	75985317	6.01087	5.50283	5.73226	5.62351	4.8087	2.59281	2.66921	2.72991	2.13227	2.79572	2.55325	2.78306	2.71353	2.44836	2.82183	2.62409			Breast_SE_17_3	1	10415556	10435556
Breast_SE_1066_5	3	37225247	37245247	4.74752	5.16487	4.99534	4.60093	4.13059	2.38075	2.50943	2.52403	1.4064	2.10528	2.53751	2.38897	2.68156	2.14503	2.11425	2.45459			Breast_SE_18_1	1	10443212	10463212
Breast_SE_889_2	2	197500151	197520151	5.30044	5.25333	5.03435	5.17212	4.79395	2.61204	2.66838	2.67938	1.97953	2.21706	2.57106	2.61371	2.74222	2.55095	2.53545	2.62517			Breast_SE_18_2	1	10463212	10483212
Breast_SE_1002_1	3	4962712	4982712	6.37478	6.31693	6.00424	5.62217	6.13327	2.90951	2.77955	2.9729	2.56863	2.75862	2.9003	2.93313	2.9276	2.84743	2.62427	2.43449			Breast_SE_18_3	1	10483212	10503212
Breast_SE_5474_4	22	46053316	46073316	8.18766	6.92256	7.88852	6.46999	5.96215	3.25927	3.16868	3.18364	3.04011	2.97455	3.22165	3.07287	3.0924	2.99236	3.0101	2.70249			Breast_SE_18_4	1	10503212	10523212
Breast_SE_316_12	1	155116696	155136696	6.76263	6.15052	8.20141	6.67897	6.77585	2.8703	2.72986	2.85977	2.63633	2.97621	2.44878	2.69127	2.76628	2.95173	2.99185	2.92055			Breast_SE_18_5	1	10523212	10543212
Breast_SE_4188_1	14	81210576	81230576	5.31201	5.63268	5.78841	5.28581	5.40629	2.66855	2.62481	2.77801	2.39695	2.54599	2.53097	2.64164	2.65523	2.58111	2.32292	2.55408			Breast_SE_19_1	1	10587142	10607142
Breast_SE_4190_1	14	81210602	81230602	5.31201	5.63268	5.78987	5.28926	5.40537	2.66855	2.62444	2.77801	2.39695	2.54658	2.53097	2.64199	2.65523	2.58111	2.32292	2.55428			Breast_SE_19_2	1	10607142	10627142
Breast_SE_4191_1	14	81210519	81230519	5.31343	5.63352	5.78915	5.28581	5.40626	2.66855	2.62481	2.77861	2.39695	2.54658	2.53042	2.64199	2.65553	2.58111	2.32292	2.55334			Breast_SE_19_3	1	10627142	10647142
Breast_SE_4189_1	14	81210442	81230442	5.31485	5.63268	5.78766	5.28602	5.40626	2.66827	2.62512	2.77861	2.39829	2.54481	2.5314	2.64199	2.65553	2.58154	2.32292	2.55389			Breast_SE_19_4	1	10647142	10667142
Breast_SE_3782_8	12	56206740	56226740	5.09513	5.38459	5.47625	4.6343	4.43067	2.62806	2.71186	2.60633	1.02726	1.86831	2.61096	2.35173	2.70691	2.20069	2.24176	2.3077			Breast_SE_19_5	1	10667142	10687142
Breast_SE_2748_6	8	100942417	100962417	6.85952	7.32968	6.82828	5.93606	5.87905	2.98792	2.92754	2.90531	2.95922	2.79834	2.95068	2.87712	2.95899	2.90688	2.95534	2.74742			Breast_SE_19_6	1	10687142	10707142
Breast_SE_4439_4	16	3270542	3290542	4.68009	5.86423	4.93899	5.34222	4.58127	2.63347	2.71634	2.65504	1.82243	1.53615	2.48635	2.47543	2.52864	2.17172	2.22235	2.43075			Breast_SE_19_7	1	10707142	10727142
Breast_SE_552_2	1	244832322	244852322	6.15493	5.70487	6.15853	5.90524	5.41526	2.79923	2.66424	2.79471	2.46661	2.78532	2.64383	2.78213	2.69143	2.67676	2.62382	2.77694			Breast_SE_19_8	1	10727142	10747142
Breast_SE_3288_1	10	97384715	97404715	2.78759	4.29315	4.46021	4.63195	4.76642	2.13836	1.50973	1.71193	0	0	1.37683	1.46649	2.09587	0	1.32521	1.60975			Breast_SE_19_9	1	10747142	10767142
Breast_SE_4004_1	13	52441933	52461933	5.80089	5.4034	4.78108	4.20557	4.56607	2.60053	2.65986	2.58843	1.87088	2.36797	2.49958	2.18889	2.59809	2.10448	2.14834	2.60002			Breast_SE_19_10	1	10767142	10787142
Breast_SE_5097_9	19	45173827	45193827	5.18296	5.73359	5.00936	4.87582	4.62104	2.53853	2.41429	2.57484	2.21224	2.01564	2.54891	2.16318	2.44116	2.33842	2.68886	2.37888			Breast_SE_19_11	1	10787142	10807142
Breast_SE_4640_13	17	8216633	8236633	4.76504	5.35163	5.39595	6.06904	5.49246	2.80223	2.7697	2.87073	1.44487	2.60394	2.67037	2.6877	2.8399	2.38305	2.14018	2.48827			Breast_SE_19_12	1	10807142	10827142
Breast_SE_5272_20	20	49909659	49929659	4.83611	5.88652	5.09202	6.304	5.64875	2.68474	2.58514	2.77559	2.08988	2.01269	2.62356	2.65512	2.70744	2.59876	2.48489	2.22188			Breast_SE_19_13	1	10827142	10847142
Breast_SE_4602_11	16	87936622	87956622	5.51485	5.68016	5.64273	5.31033	5.16139	2.51953	2.67123	2.64186	2.44905	2.3293	2.597	2.26738	2.41551	2.54457	2.88689	2.66563			Breast_SE_20_1	1	10884569	10904569
Breast_SE_3508_2	11	65855912	65875912	7.07433	6.77528	6.66527	5.70923	6.70397	3.14261	2.99932	3.10463	2.89171	2.31836	3.10047	2.86877	2.99245	3.09687	2.97421	2.75314			Breast_SE_20_2	1	10904569	10924569
Breast_SE_1273_1	3	150536845	150556845	5.80307	5.64961	5.84457	4.98803	4.7296	2.59559	2.58175	2.6995	1.53545	1.14585	2.61011	2.42067	2.56657	2.20924	2.36872	2.55178			Breast_SE_20_3	1	10924569	10944569
Breast_SE_3915_16	12	121792859	121812859	7.85697	7.5637	7.73696	7.58337	6.15047	2.99803	3.1779	2.98472	3.11304	2.77799	2.99712	2.96769	3.14968	3.20871	2.98861	2.91468			Breast_SE_20_4	1	10944569	10964569
Breast_SE_4409_2	15	92798427	92818427	6.73587	5.62993	7.04273	6.97769	7.50092	3.02231	2.84867	2.97315	2.55579	2.99361	2.84878	2.94419	2.99086	2.83906	2.79168	2.81085			Breast_SE_20_5	1	10964569	10984569
Breast_SE_4892_1	18	12366533	12386533	5.74763	5.51528	4.95522	5.23741	4.65774	2.57477	2.56585	2.74719	1.79933	1.65674	2.42111	2.63442	2.40968	2.26356	2.34537	2.36856			Breast_SE_21_1	1	11044385	11064385
Breast_SE_48_1	1	19196182	19216182	4.2727	4.57458	4.65985	4.8405	5.00514	2.54507	2.51962	2.55361	1.16718	1.84002	2.43327	2.13621	2.48553	2.3666	2.15565	1.98439			Breast_SE_21_2	1	11064385	11084385
Breast_SE_4662_7	17	18255950	18275950	5.52149	6.79138	6.03034	5.86204	5.79152	2.8231	2.87755	2.88001	2.72123	2.19598	2.7863	2.71912	3.00202	2.71922	2.77228	2.44321			Breast_SE_22_1	1	11118022	11138022
Breast_SE_1788_2	5	133040664	133060664	5.81749	5.35517	5.69305	5.48933	5.1389	2.80559	2.72395	2.76976	0.929263	2.45524	2.66847	2.59839	2.83835	2.17678	2.42854	2.29515			Breast_SE_22_2	1	11138022	11158022
Breast_SE_4554_2	16	69714563	69734563	5.93877	4.60054	6.11922	6.2253	6.14288	2.86862	2.77188	2.82655	1.70155	2.80995	2.61093	2.62438	2.73647	2.26631	2.47065	2.60992			Breast_SE_22_3	1	11158022	11178022
Breast_SE_3785_2	12	57070001	57090001	6.21687	5.69634	5.90663	5.84208	5.53387	2.97971	2.8256	2.81184	2.59993	2.34615	2.75092	2.72479	2.76295	2.63089	2.5711	2.51562			Breast_SE_22_4	1	11178022	11198022
Breast_SE_1674_5	5	43053011	43073011	6.11963	5.72659	6.36679	5.2694	5.57863	3.01367	2.48143	2.81555	2.21813	2.7327	2.82383	3.03997	3.01631	2.6335	2.4524	2.50672			Breast_SE_23_1	1	11640631	11660631
Breast_SE_2172_2	6	136285492	136305492	5.51882	5.63239	5.40629	5.52635	5.45474	2.74983	2.68581	2.63315	2.34572	2.23711	2.51837	2.44338	2.64373	2.66755	2.54679	2.1379			Breast_SE_23_2	1	11660631	11680631
Breast_SE_5137_5	19	58571802	58591802	4.85599	5.55002	5.29909	4.59683	5.84931	2.78648	2.78887	2.65199	2.23714	2.04316	2.66033	2.17437	2.79554	2.58097	2.49996	2.25166			Breast_SE_23_3	1	11680631	11700631
Breast_SE_1646_2	5	32160747	32180747	5.9531	6.37781	6.11322	5.13384	5.24372	2.83154	2.67659	2.83979	2.52729	2.45611	2.67983	2.72635	2.75328	2.68818	2.55289	2.63195			Breast_SE_23_4	1	11700631	11720631
Breast_SE_4231_27	14	105472931	105492931	6.60974	8.62425	7.4065	5.31504	6.72869	3.05204	3.2282	2.89751	3.05072	2.52801	2.85104	3.10949	2.83906	2.85942	2.88464	2.94999			Breast_SE_23_5	1	11720631	11740631
Breast_SE_2182_3	6	139361367	139381367	6.67212	5.63884	5.48145	5.79812	5.07263	2.94927	2.92955	2.85787	2.32994	2.73699	2.76117	2.74633	2.8399	2.67915	2.74112	2.50936			Breast_SE_23_6	1	11740631	11760631
Breast_SE_120_8	1	40035213	40055213	5.71744	4.75584	5.67101	4.68197	5.10561	2.8432	2.55703	2.77993	1.21492	2.25198	2.81398	2.56465	2.7006	2.37634	2.63551	2.32013			Breast_SE_24_1	1	11777403	11797403
Breast_SE_3495_7	11	61436810	61456810	1.00267	0.208949	1.87525	1.13374	1.75594	0	0	0	0	0	0	0	0	0	0	0			Breast_SE_24_2	1	11797403	11817403
Breast_SE_3076_12	9	128769593	128789593	5.068	5.26766	5.53287	4.28735	5.00993	2.62884	2.60285	2.52953	2.14347	2.0691	2.43224	2.44002	2.63207	2.56167	2.53776	2.3458			Breast_SE_24_3	1	11817403	11837403
Breast_SE_2948_1	9	72352087	72372087	5.05211	5.95376	6.18985	6.00514	5.13644	2.83882	2.81358	2.82664	2.47835	2.57009	2.67437	2.71992	2.80907	2.71385	2.50293	2.48824			Breast_SE_25_1	1	11884764	11904764
Breast_SE_1362_1	3	196487986	196507986	5.13861	4.31918	5.47156	5.23836	4.97754	2.69499	2.49912	2.42387	1.71274	2.39981	2.73599	2.56161	2.84934	2.27965	2.30102	2.35472			Breast_SE_25_2	1	11904764	11924764
Breast_SE_4764_5	17	51104314	51124314	5.24231	5.77868	6.65767	5.13891	5.05077	2.55494	2.57019	2.61456	2.44599	2.59355	2.52415	2.4202	2.68025	2.50939	2.34758	2.41898			Breast_SE_25_3	1	11924764	11944764
Breast_SE_3609_4	11	119100097	119120097	5.05085	4.99162	5.5024	5.00657	5.21448	2.81329	2.77092	2.60631	2.36915	2.09985	2.69934	2.40864	2.84043	2.39688	2.73964	2.35815			Breast_SE_25_4	1	11944764	11964764
Breast_SE_376_1	1	179870284	179890284	5.2322	5.20029	5.92146	5.06489	5.54745	2.73145	2.61289	2.75065	2.3926	2.54916	2.53529	2.50336	2.74604	2.69155	2.64816	2.61245			Breast_SE_25_5	1	11964764	11984764
Breast_SE_4362_2	15	75452013	75472013	6.29881	5.91176	6.28534	5.98187	5.3952	2.74696	2.87622	2.91069	2.649	2.3184	2.66688	2.62131	2.79217	2.65292	2.60596	2.68669			Breast_SE_25_6	1	11984764	12004764
Breast_SE_1169_1	3	93460591	93480591	0	2.34049	3.68303	3.27115	3.92276	0	0	0	0	0	0	0	0	0	1.16002	1.98179			Breast_SE_26_1	1	12101090	12121090
Breast_SE_1170_1	3	93460586	93480586	0	2.34049	3.68303	3.27115	3.92276	0	0	0	0	0	0	0	0	0	1.16002	1.98179			Breast_SE_26_2	1	12121090	12141090
Breast_SE_5179_10	20	17963651	17983651	6.15539	5.77922	5.24428	5.63467	5.60655	2.95509	2.77177	2.76531	2.44457	2.31056	2.76684	2.67043	2.878	2.56013	2.44073	2.48794			Breast_SE_26_3	1	12141090	12161090
Breast_SE_5256_11	20	45967083	45987083	6.12032	5.87229	4.50846	5.24253	5.37132	2.84692	2.64735	2.84308	1.55042	2.35184	2.77071	2.69075	2.83371	2.4011	2.40671	2.5061			Breast_SE_26_4	1	12161090	12181090
Breast_SE_3907_8	12	120194698	120214698	5.49684	5.29921	5.64912	6.3552	5.11115	2.78206	2.74149	2.68353	2.15504	2.40143	2.57935	2.56265	2.84681	2.48836	2.38516	2.60188			Breast_SE_26_5	1	12181090	12201090
Breast_SE_4639_3	17	7823751	7843751	5.81518	6.96889	6.84041	6.70127	5.91127	3.02444	3.00437	2.99779	2.90808	2.50213	2.96109	2.90152	2.98741	3.06894	2.77524	2.58294			Breast_SE_26_6	1	12201090	12221090
Breast_SE_3514_15	11	67495665	67515665	5.81172	7.18893	5.93966	5.60988	6.09816	2.86543	2.97128	2.90925	2.86916	2.37847	2.70551	2.543	2.79419	2.73474	2.79329	2.58746			Breast_SE_26_7	1	12221090	12241090
Breast_SE_322_13	1	156121803	156141803	7.03976	5.51542	6.33964	6.48269	7.01533	3.12059	2.89082	3.03512	2.37144	3.12154	2.8692	2.86895	3.06858	2.88071	2.96465	2.66104			Breast_SE_26_8	1	12241090	12261090
Breast_SE_3384_8	11	809009	829009	6.26176	7.47841	7.20863	6.35784	5.63659	2.84732	3.02377	2.92599	2.99095	2.42407	2.84679	2.70874	3.01268	2.83728	3.01172	2.5453			Breast_SE_27_1	1	12336773	12356773
Breast_SE_4185_2	14	77313247	77333247	4.96739	5.23343	5.41368	4.42271	4.6991	2.59099	2.61673	2.84913	2.05356	2.01623	2.57558	2.53923	2.62671	2.41039	2.37665	2.37864			Breast_SE_27_2	1	12356773	12376773
Breast_SE_82_1	1	26613183	26633183	5.15728	5.41471	5.28764	4.95207	5.31887	2.86319	2.76211	2.79348	2.3725	2.58762	2.74565	2.67836	2.62268	2.58906	2.71534	2.28725			Breast_SE_27_3	1	12376773	12396773
Breast_SE_1840_15	5	149546443	149566443	6.20707	5.61848	5.9568	4.66307	4.75702	2.98047	2.74286	2.86523	1.81559	2.88457	2.81472	2.75064	2.88983	2.6296	2.68399	2.64069			Breast_SE_27_4	1	12396773	12416773
Breast_SE_4993_5	19	4371841	4391841	6.59912	5.21905	6.12896	5.28785	5.08058	2.70935	2.62302	2.70472	2.33732	2.26187	2.86049	2.58079	2.97103	2.67396	2.81922	2.58111			Breast_SE_27_5	1	12416773	12436773
Breast_SE_1110_4	3	52684036	52704036	4.27616	5.50565	5.25301	4.00911	4.05478	2.60858	2.33397	2.32166	1.25046	2.02096	2.22878	1.39951	2.44766	2.06588	2.05186	2.49199			Breast_SE_27_6	1	12436773	12456773
Breast_SE_5112_6	19	49494514	49514514	5.0456	5.4777	5.08293	5.30906	4.84576	2.6394	2.83237	2.4999	2.19496	1.90386	2.50701	2.41041	2.65278	2.36774	2.29998	2.59569			Breast_SE_27_7	1	12456773	12476773
Breast_SE_5112_13	19	49634514	49654514	6.27206	5.90575	6.31366	5.94729	5.97403	2.92524	2.90084	2.79501	2.79827	2.41715	2.88465	2.54301	2.91038	2.83792	2.77737	2.54818			Breast_SE_27_8	1	12476773	12496773
Breast_SE_3254_2	10	74157582	74177582	4.25854	4.51819	5.0149	4.65277	4.39205	2.4418	2.43369	2.18464	0.808716	1.95595	2.29078	2.00269	2.50743	2.24049	1.99617	2.1485			Breast_SE_27_9	1	12496773	12516773
Breast_SE_2648_1	8	52704684	52724684	4.73282	5.6201	5.4432	5.15042	4.80768	2.74624	2.53468	2.56767	2.24573	2.34456	2.56958	2.51991	2.56899	2.5188	2.18039	2.25211			Breast_SE_27_10	1	12516773	12536773
Breast_SE_1499_1	4	98919064	98939064	5.18587	4.7165	4.89145	4.40776	4.5413	2.69877	2.63837	2.80502	1.58544	2.32216	2.56341	2.47672	2.72777	2.34079	2.32485	2.21213			Breast_SE_27_11	1	12536773	12556773
Breast_SE_5455_14	22	41429976	41449976	5.74769	6.73302	6.33253	5.54146	5.4967	2.96665	2.99862	3.00965	2.7261	2.52658	2.91631	2.8769	2.86132	2.89589	2.86055	2.62122			Breast_SE_27_12	1	12556773	12576773
Breast_SE_1988_11	6	31806089	31826089	6.45974	5.49691	6.45368	5.50503	5.67007	2.85358	2.88509	2.77921	2.66729	2.92387	2.86615	2.79737	2.93812	2.68598	2.86235	2.78012			Breast_SE_27_13	1	12576773	12596773
Breast_SE_553_2	1	244964352	244984352	6.20898	5.99014	6.00043	5.93088	5.58235	2.79074	2.83527	2.91469	2.63306	2.60966	2.7815	2.91028	2.80573	2.77345	2.71944	2.62682			Breast_SE_27_14	1	12596773	12616773
Breast_SE_2805_2	8	124461195	124481195	5.67308	6.25226	5.76462	5.35816	5.14117	2.70275	2.51711	2.77425	2.42623	2.50848	2.60548	2.50249	2.29326	2.62994	2.16209	2.52667			Breast_SE_27_15	1	12616773	12636773
Breast_SE_4772_9	17	57988915	58008915	5.73498	4.98663	5.33986	4.91449	5.16638	2.70333	2.71554	2.65531	2.24062	2.50582	2.61117	2.66642	2.73232	2.61254	2.46684	2.50784			Breast_SE_27_16	1	12636773	12656773
Breast_SE_321_1	1	155674847	155694847	5.70409	5.50467	6.14653	5.42653	4.83887	2.82316	2.72458	2.73039	2.31734	2.16157	2.65148	2.67602	2.72034	2.68944	2.60244	2.6044			Breast_SE_28_1	1	13573647	13593647
Breast_SE_2745_6	8	100501632	100521632	0	5.07678	2.27463	0	4.76166	0	0	0.953582	0	0	0	0	0	0	0	0			Breast_SE_28_2	1	13593647	13613647
Breast_SE_3236_4	10	63506758	63526758	5.09881	4.69045	5.02785	4.32501	5.45332	2.53039	2.43025	2.45176	2.11964	2.31671	2.25065	2.29377	2.64765	2.26324	2.50222	2.1594			Breast_SE_28_3	1	13613647	13633647
Breast_SE_4342_3	15	69445377	69465377	5.47939	4.96853	5.15327	5.84027	4.74237	2.69145	2.67746	2.82114	1.32391	1.95693	2.57089	2.50517	2.63131	2.18655	2.25761	2.54222			Breast_SE_29_1	1	13740826	13760826
Breast_SE_5441_2	22	38689455	38709455	5.15758	6.45749	6.91565	5.37369	5.59546	2.70333	2.74861	2.84906	2.7546	2.17972	2.75322	2.41529	2.83033	2.76236	2.77663	2.3812			Breast_SE_29_2	1	13760826	13780826
Breast_SE_2067_2	6	63566622	63586622	5.89443	6.26052	5.912	6.14885	5.41164	2.77573	2.82121	2.75824	2.6467	2.62481	2.56359	2.59843	2.75685	2.73553	2.79054	2.65027			Breast_SE_29_3	1	13780826	13800826
Breast_SE_5198_4	20	31700677	31720677	6.85658	6.30622	5.90071	5.79509	5.70574	2.68895	2.90328	2.46683	2.56	2.84927	2.66536	2.36535	3.24598	2.65623	2.84112	2.59771			Breast_SE_29_4	1	13800826	13820826
Breast_SE_1199_1	3	113733739	113753739	5.64579	5.36018	5.3936	5.34364	5.28938	2.64566	2.61757	2.66216	2.3719	2.40198	2.62289	2.43271	2.61486	2.71632	2.52852	2.40049			Breast_SE_30_1	1	14869445	14889445
Breast_SE_1230_2	3	129172174	129192174	5.9296	5.67906	5.40948	5.50719	5.45294	2.81807	2.73588	2.76738	2.12266	1.3983	2.74343	2.56076	2.70299	2.46344	2.50515	2.47345			Breast_SE_30_2	1	14889445	14909445
Breast_SE_3532_1	11	73770813	73790813	5.16848	4.08563	5.06899	5.34737	5.30124	2.63705	2.65153	2.49734	1.54272	2.60421	2.5208	2.35209	2.64241	2.14753	2.46661	2.29628			Breast_SE_30_3	1	14909445	14929445
Breast_SE_24_2	1	11797403	11817403	4.91093	4.82942	4.84512	4.69616	4.72636	2.68464	2.52694	2.62273	1.57894	2.38115	2.48969	2.50575	2.75262	2.41059	2.20219	2.14349			Breast_SE_30_4	1	14929445	14949445
Breast_SE_638_6	2	38069289	38089289	6.38166	5.16459	6.44064	5.18163	5.89154	3.02184	2.87043	3.01726	2.29302	2.47431	2.94149	3.099	2.58625	1.78976	2.80041	2.79881			Breast_SE_30_5	1	14949445	14969445
Breast_SE_138_3	1	45517489	45537489	5.61775	4.58956	5.39715	6.12633	5.15721	2.67898	2.70359	2.67415	1.91182	2.56825	2.58117	2.39284	2.50741	2.36909	2.4293	2.58121			Breast_SE_30_6	1	14969445	14989445
Breast_SE_826_1	2	156422110	156442110	5.26693	4.77921	5.08871	5.02609	4.95465	2.5048	2.69015	2.71671	2.18634	2.33785	2.63482	2.47856	2.69769	2.53466	2.56556	2.49476			Breast_SE_30_7	1	14989445	15009445
Breast_SE_4989_9	19	2535794	2555794	7.50802	4.87634	5.98515	5.79822	5.29675	2.80341	2.94198	2.67602	2.30645	2.46678	2.97919	2.83493	2.92901	2.46497	2.86772	2.33828			Breast_SE_30_8	1	15009445	15029445
Breast_SE_137_2	1	45321982	45341982	6.58345	4.45866	4.80682	5.68678	4.97406	2.79995	2.62464	2.66955	1.55864	2.10878	2.5821	2.35959	2.50953	2.27968	2.65976	2.2392			Breast_SE_30_9	1	15029445	15049445
Breast_SE_1118_5	3	57586129	57606129	4.64373	5.47338	5.24062	5.35349	4.73621	2.63761	2.48674	2.67053	0.739939	2.34846	2.58979	2.14446	2.77157	2.11327	2.04275	2.35827			Breast_SE_31_1	1	15070371	15090371
Breast_SE_4543_1	16	67829682	67849682	6.17433	5.57848	6.07402	5.66918	6.04501	2.92997	2.93746	2.83134	2.70686	2.30085	2.85088	2.59566	2.80793	2.78854	2.66656	2.70512			Breast_SE_31_2	1	15090371	15110371
Breast_SE_4146_1	14	64488757	64508757	6.27721	6.21849	6.17026	5.39169	5.44874	2.89739	2.9617	2.92294	2.70742	2.78274	2.80516	2.80073	2.84983	2.73247	2.68852	2.59437			Breast_SE_32_1	1	15122919	15142919
Breast_SE_243_1	1	108952849	108972849	4.0713	4.13426	4.35832	4.72021	5.06599	2.31906	2.27442	2.03876	1.08676	0.674165	1.83321	1.7057	2.14447	1.69461	2.36672	1.82876			Breast_SE_32_2	1	15142919	15162919
Breast_SE_5105_22	19	47111917	47131917	6.55435	6.44953	6.14769	6.55729	5.77206	2.92584	2.96938	2.85247	2.84835	2.5987	2.93727	2.65979	2.9186	2.85951	2.88975	2.50653			Breast_SE_32_3	1	15162919	15182919
Breast_SE_5136_4	19	58379062	58399062	6.13437	6.25507	6.92783	6.02291	6.05238	2.96673	2.90983	2.84256	2.93974	2.0101	2.84625	2.43088	2.91868	2.79411	2.88291	2.62344			Breast_SE_32_4	1	15182919	15202919
Breast_SE_299_3	1	151055670	151075670	6.36045	5.13599	6.1376	5.60905	6.05006	2.87312	2.79576	2.81802	2.42032	2.67725	2.76453	2.74022	2.8332	2.8983	2.70396	2.79567			Breast_SE_32_5	1	15202919	15222919
Breast_SE_5136_3	19	58359062	58379062	4.47527	5.21323	5.63095	4.25363	4.94022	2.67022	2.65415	2.49013	2.10807	1.50244	2.59329	2.14278	2.59262	2.29239	2.53679	2.27534			Breast_SE_32_6	1	15222919	15242919
Breast_SE_3180_1	10	27227013	27247013	6.00861	5.07055	4.95543	5.20473	4.91389	2.79645	2.7115	2.65281	1.61717	2.47676	2.60688	2.35342	2.81249	2.58079	2.21072	2.54781			Breast_SE_32_7	1	15242919	15262919
Breast_SE_5015_8	19	11375630	11395630	4.13608	5.63864	4.86139	3.748	5.11855	2.52591	2.6711	2.67334	1.85815	1.95112	2.58759	2.49453	2.61256	2.26939	2.42565	2.27284			Breast_SE_32_8	1	15262919	15282919
Breast_SE_3027_1	9	110241078	110261078	5.50594	5.72764	5.76058	6.29187	5.76726	2.80216	2.52857	2.84336	2.43161	2.29979	2.65566	2.71646	2.82049	2.77341	2.48145	2.47296			Breast_SE_33_1	1	15315639	15335639
Breast_SE_1_39	1	1655298	1675298	4.03082	4.49485	4.51255	3.57372	4.10445	2.53564	2.37007	2.01421	0.80581	1.77147	2.1157	2.13087	2.397	1.78394	2.12266	2.06329			Breast_SE_33_2	1	15335639	15355639
Breast_SE_3382_3	11	223779	243779	3.98006	4.95707	5.31809	4.08896	4.52379	2.42791	2.42796	2.34037	1.34972	1.49353	2.36738	2.27039	2.51146	2.35972	2.08467	1.75296			Breast_SE_33_3	1	15355639	15375639
Breast_SE_107_8	1	32811008	32831008	5.73714	4.95017	5.43876	4.81532	4.61205	2.84744	2.79409	2.82886	1.71773	2.36451	2.81609	2.60365	2.72148	2.66846	2.63815	2.28219			Breast_SE_34_1	1	15400095	15420095
Breast_SE_4682_4	17	28740399	28760399	7.13928	7.98723	7.99592	5.80009	5.37816	2.82894	2.9681	2.81114	2.8113	2.8943	2.59186	2.79792	2.83232	2.83286	2.88239	2.7599			Breast_SE_34_2	1	15420095	15440095
Breast_SE_5108_1	19	48441405	48461405	3.85138	4.35386	4.24608	4.13276	4.44148	2.45836	2.43459	2.3962	1.88778	1.75702	2.46	1.80056	2.45281	1.89339	2.38069	2.06979			Breast_SE_35_1	1	15591530	15611530
Breast_SE_4779_6	17	59827166	59847166	7.72278	6.12883	7.17452	7.21863	5.45472	2.99948	2.9533	2.87869	2.23069	3.26842	2.85133	3.14456	3.07535	2.64833	2.81968	2.87805			Breast_SE_35_2	1	15611530	15631530
Breast_SE_206_1	1	85256782	85276782	5.79904	4.99458	4.83005	4.48498	5.10413	2.62141	2.34766	2.65408	1.40978	1.93323	2.51001	2.34334	2.69374	2.50805	2.45756	1.94732			Breast_SE_35_3	1	15631530	15651530
Breast_SE_5587_12	X	154541666	154561666	6.32894	5.55264	6.82336	6.57484	4.99066	2.9145	2.50952	2.9538	2.23639	2.70556	2.63375	2.43778	2.75419	2.66467	2.77575	2.58959			Breast_SE_36_1	1	15666394	15686394
Breast_SE_4198_2	14	91500751	91520751	5.57334	6.24024	6.15994	5.41741	5.4003	2.71248	2.81426	2.85184	2.55872	1.89096	2.63987	2.71314	2.72846	2.70697	2.57998	2.70719			Breast_SE_36_2	1	15686394	15706394
Breast_SE_4616_4	17	2383208	2403208	6.42672	7.5865	7.1359	7.05516	6.26978	3.09482	3.07663	3.07061	3.12802	2.30604	2.99035	2.84634	3.03365	3.24697	2.99067	2.53367			Breast_SE_36_3	1	15706394	15726394
Breast_SE_2626_6	8	42338266	42358266	1.53874	2.86945	3.74498	1.50312	1.65149	0	0.990098	0	0	0	0	0	1.10836	0	0	1.09779			Breast_SE_36_4	1	15726394	15746394
Breast_SE_4432_1	16	220222	240222	4.98567	6.08115	5.56418	5.17311	5.2724	2.64885	2.68196	2.72077	2.50816	1.81193	2.48432	2.41371	2.55905	2.53693	2.37437	2.42985			Breast_SE_36_5	1	15746394	15766394
Breast_SE_2433_1	7	100425478	100445478	6.43686	6.45299	7.34275	6.62022	5.60408	3.01617	3.02323	3.07695	2.87034	2.50156	2.98134	2.90743	3.00649	3.04906	2.95647	2.79937			Breast_SE_36_6	1	15766394	15786394
Breast_SE_5132_6	19	55653669	55673669	6.04005	5.57061	6.14031	5.58821	5.66242	2.92868	2.81543	2.7627	2.52159	2.36378	2.76828	2.81094	2.81824	2.92307	2.71578	2.46898			Breast_SE_36_7	1	15786394	15806394
Breast_SE_4640_14	17	8236633	8256633	4.05957	5.26492	5.36632	5.75219	4.48889	2.68288	2.67448	2.54773	1.07487	2.40208	2.38173	2.29446	2.67528	2.41822	2.29944	2.26412			Breast_SE_36_8	1	15806394	15826394
Breast_SE_2221_2	6	159775269	159795269	4.59603	5.34954	5.00355	4.91008	4.39904	2.80981	2.67067	2.67982	1.83553	1.85432	2.51366	2.46042	2.61725	2.4527	2.40071	2.35944			Breast_SE_36_9	1	15826394	15846394
Breast_SE_1095_3	3	48427794	48447794	4.93217	5.9036	6.0133	5.84949	5.24798	2.75231	2.99305	2.75438	2.56642	2.83827	2.64388	2.30501	2.71622	2.7467	2.73924	2.68016			Breast_SE_36_10	1	15846394	15866394
Breast_SE_661_2	2	47164847	47184847	5.51472	5.22677	5.92337	5.27571	4.87395	2.67794	2.65914	2.67035	2.21584	2.38276	2.71213	2.74775	2.72516	2.68237	2.41632	2.32742			Breast_SE_36_11	1	15866394	15886394
Breast_SE_4172_3	14	74013367	74033367	3.42763	5.14296	4.23935	4.83453	4.37101	2.45028	2.5033	2.48802	1.45593	1.88952	2.43338	2.43032	2.47463	2.25792	2.01962	2.12593			Breast_SE_36_12	1	15886394	15906394
Breast_SE_1095_4	3	48447794	48467794	4.46856	4.67536	5.10498	4.45191	5.28265	2.76047	2.53929	2.7436	1.24673	2.29065	2.63755	2.49148	2.71726	2.38415	2.31953	2.18242			Breast_SE_36_13	1	15906394	15926394
Breast_SE_2022_4	6	41069570	41089570	5.60057	5.87707	6.12954	5.63779	5.07905	2.70217	2.68924	2.80474	2.60406	2.68445	2.74587	2.62114	2.89462	2.61439	2.67274	2.53427			Breast_SE_36_14	1	15926394	15946394
Breast_SE_3852_4	12	95203587	95223587	5.54545	4.78947	5.13293	4.76416	6.28439	2.27726	2.50374	2.34309	1.68501	2.71016	2.15771	2.28345	2.84379	1.98021	2.32354	2.12777			Breast_SE_36_15	1	15946394	15966394
Breast_SE_3607_3	11	118901169	118921169	8.09673	6.67789	7.1083	6.33275	6.55871	3.21918	3.11613	3.17738	3.11866	2.98561	3.11591	3.09588	3.24456	3.10629	3.16662	2.64315			Breast_SE_36_16	1	15966394	15986394
Breast_SE_2255_8	7	2344271	2364271	6.05928	5.68875	5.82231	5.3929	4.84007	2.86579	2.75069	2.76958	2.36564	2.24274	2.7039	2.77658	2.72589	2.67372	2.57157	2.69502			Breast_SE_37_1	1	15985388	16005388
Breast_SE_1104_10	3	50283245	50303245	4.97143	5.02049	5.28993	5.87708	4.92089	2.82632	2.89624	2.88935	1.87213	2.27524	2.76474	2.43797	2.88843	2.63021	2.65005	2.4243			Breast_SE_37_2	1	16005388	16025388
Breast_SE_3621_1	11	123050438	123070438	5.85744	4.94585	4.74341	5.1761	4.98409	2.87074	2.71934	2.80319	2.10352	2.3349	2.71741	2.60484	2.83635	2.47005	2.60679	2.5669			Breast_SE_37_3	1	16025388	16045388
Breast_SE_241_2	1	108678006	108698006	5.51242	4.8138	4.76014	4.65322	5.31031	2.63121	2.50636	2.46031	1.86233	1.52996	2.46305	2.25258	2.61035	2.38721	2.42251	2.03832			Breast_SE_37_4	1	16045388	16065388
Breast_SE_2372_3	7	56040091	56060091	5.61142	4.75336	5.00864	4.65421	4.23133	2.76987	2.54351	2.61455	1.57035	2.09449	2.61586	2.43773	2.64182	2.39957	2.80453	2.38701			Breast_SE_37_5	1	16065388	16085388
Breast_SE_4763_4	17	50848269	50868269	5.68531	6.96626	8.08463	5.40752	5.29605	2.62911	2.76702	2.75948	2.64802	2.47589	2.42914	2.7494	2.71381	2.69814	2.61472	2.87615			Breast_SE_37_6	1	16085388	16105388
Breast_SE_2932_4	9	37455955	37475955	4.56626	4.60752	5.54228	5.50099	5.59905	3.02921	2.75598	2.77199	1.819	2.71581	2.66005	2.68682	2.81384	2.68305	2.80748	2.42691			Breast_SE_37_7	1	16105388	16125388
Breast_SE_1992_3	6	33198939	33218939	6.37045	5.87978	5.96122	5.55114	6.08888	2.87084	2.9095	2.89098	2.73828	2.19152	2.92134	2.77755	2.95965	2.75187	2.83283	2.56643			Breast_SE_37_8	1	16125388	16145388
Breast_SE_5009_5	19	8375665	8395665	3.3738	5.68007	5.23993	3.86807	4.33461	2.31352	2.54736	2.47783	2.06414	2.1116	2.38443	2.24214	2.40102	2.22193	2.29632	2.36426			Breast_SE_37_9	1	16145388	16165388
Breast_SE_3482_3	11	47750294	47770294	5.62789	5.97383	5.35558	4.87016	4.8404	2.81669	2.7752	2.68679	2.31518	2.03182	2.65825	2.47494	2.82465	2.57041	2.67213	2.54751			Breast_SE_37_10	1	16165388	16185388
Breast_SE_5280_5	20	53619400	53639400	4.97126	4.54167	6.55397	5.25234	5.59716	2.82519	2.51211	2.21285	1.27766	2.84732	2.60252	2.64066	2.75995	2.21699	2.60117	2.35338			Breast_SE_37_11	1	16185388	16205388
Breast_SE_2260_8	7	5415590	5435590	6.9387	7.68317	8.86901	5.90989	6.50807	3.19593	3.18098	3.20878	3.2469	2.90527	3.20032	3.17468	3.19713	3.25689	3.19266	3.11774			Breast_SE_37_12	1	16205388	16225388
Breast_SE_736_12	2	85535779	85555779	6.04817	6.00362	6.45685	5.86305	5.08126	2.95735	2.86205	2.93264	2.64899	2.74858	2.82117	2.77857	2.84612	2.76794	2.69254	2.76147			Breast_SE_37_13	1	16225388	16245388
Breast_SE_2420_2	7	96312112	96332112	4.10891	4.1802	5.49403	4.87104	4.39323	2.47726	2.63612	2.56583	1.40576	2.41502	2.31531	2.31341	2.5119	2.25601	2.22783	2.39042			Breast_SE_37_14	1	16245388	16265388
Breast_SE_963_1	2	231454783	231474783	5.6026	5.54516	5.41346	4.96564	4.86685	2.71784	2.77986	2.85961	2.01285	1.6065	2.68785	2.64591	2.60726	2.46134	2.48084	2.45762			Breast_SE_37_15	1	16265388	16285388
Breast_SE_3257_3	10	75197822	75217822	5.3705	5.57468	5.54004	5.54443	5.30817	2.81143	2.77767	2.73326	2.51248	2.33539	2.71783	2.56719	2.78355	2.76258	2.69348	2.47532			Breast_SE_37_16	1	16285388	16305388
Breast_SE_563_3	1	248834037	248854037	5.24099	5.83516	6.2019	4.9448	4.63603	2.54006	2.68141	2.76895	2.28825	1.87895	2.51221	2.54818	2.66263	2.50192	2.64356	2.58549			Breast_SE_37_17	1	16305388	16325388
Breast_SE_4818_2	17	64974475	64994475	5.21288	5.02908	4.78026	4.51912	4.39961	2.34062	2.39572	2.43819	1.79606	2.63899	2.42624	2.58183	2.61578	1.95267	2.21337	2.47479			Breast_SE_37_18	1	16325388	16345388
Breast_SE_3500_20	11	62653572	62673572	6.34685	5.63822	5.26614	5.84058	4.79649	2.97147	2.87982	2.8505	2.1106	2.35762	2.85983	2.72873	2.93496	2.69555	2.76953	2.55167			Breast_SE_37_19	1	16345388	16365388
Breast_SE_4991_11	19	3498222	3518222	5.29672	6.26334	5.28895	5.40938	5.1761	2.77604	2.81163	2.7272	2.47541	2.19853	2.76361	2.70773	2.79681	2.66559	2.54914	2.56437			Breast_SE_37_20	1	16365388	16385388
Breast_SE_3907_9	12	120214698	120234698	6.86186	5.55373	5.98433	5.07267	5.19423	2.92862	2.70172	2.87284	2.31582	2.79516	2.8194	2.7758	3.04252	2.8731	2.64011	2.6585			Breast_SE_37_21	1	16385388	16405388
Breast_SE_1070_3	3	38154270	38174270	5.0244	5.52336	4.74187	5.19084	5.72144	2.81708	2.65728	2.73529	2.23677	2.19078	2.77661	2.65373	2.83694	2.43658	2.38627	2.19461			Breast_SE_38_1	1	16607085	16627085
Breast_SE_3769_6	12	52038561	52058561	1.89286	6.01899	6.64045	5.13872	5.00178	2.23489	2.05683	2.57391	2.02486	0	1.87296	1.67975	2.0338	1.38643	2.53531	2.15701			Breast_SE_38_2	1	16627085	16647085
Breast_SE_4409_6	15	92878427	92898427	5.88316	5.90648	6.5909	4.86791	5.68609	2.75777	2.65553	2.71638	2.46117	2.56407	2.2599	2.33915	2.58551	2.7034	2.45742	2.97107			Breast_SE_39_1	1	16880414	16900414
Breast_SE_3505_26	11	65481557	65501557	7.78343	5.3764	8.29519	6.30337	7.835	3.23672	3.09525	3.21922	2.4946	3.05143	3.08385	3.11684	3.16955	2.95224	2.95123	2.82712			Breast_SE_39_2	1	16900414	16920414
Breast_SE_4112_1	14	50309589	50329589	4.64758	4.6067	4.73714	4.45394	3.73585	2.33522	2.43811	2.35271	1.63506	1.53645	2.15833	2.02518	2.53757	2.00674	2.14578	2.09245			Breast_SE_39_3	1	16920414	16940414
Breast_SE_2536_3	7	158817382	158837382	5.09728	6.18417	5.67945	5.52741	5.58503	2.8766	2.58713	3.00349	2.46383	2.60813	2.78208	2.61391	2.96973	2.91934	2.68249	2.38387			Breast_SE_39_4	1	16940414	16960414
Breast_SE_1988_19	6	31966089	31986089	5.79761	5.66955	5.87266	5.31331	5.15508	2.77402	2.66497	2.63541	0.627302	1.91266	2.75324	2.54188	2.78855	2.47598	2.597	2.10075			Breast_SE_39_5	1	16960414	16980414
Breast_SE_4869_4	17	81852792	81872792	7.1623	6.97614	7.67097	6.92981	5.79421	3.0714	3.08611	3.10871	2.96737	1.90285	2.95895	3.02067	3.03607	3.01282	2.98147	2.89806			Breast_SE_39_6	1	16980414	17000414
Breast_SE_4851_15	17	75196827	75216827	5.3383	4.644	4.99017	4.54426	4.2201	2.58718	2.6059	2.56181	1.63448	2.26038	2.44516	2.7074	2.64638	2.30949	2.4575	2.50653			Breast_SE_39_7	1	17000414	17020414
Breast_SE_5418_5	22	28797317	28817317	3.86557	7.32096	6.51085	6.22625	4.60954	2.53084	2.72874	2.75001	2.54632	2.72338	2.69875	2.24485	2.59392	2.57987	2.7723	3.01902			Breast_SE_39_8	1	17020414	17040414
Breast_SE_4743_9	17	45152034	45172034	7.05101	5.62238	6.02675	5.51323	5.4702	2.89704	2.9935	2.85456	2.62589	2.85894	2.6663	2.7117	2.97935	2.79349	2.8348	2.72649			Breast_SE_40_1	1	17045073	17065073
Breast_SE_3079_9	9	129465459	129485459	6.783	6.17127	6.47317	6.03343	5.306	3.11888	3.16724	2.97743	2.73584	2.66769	2.90844	2.99766	2.83935	2.94505	2.87151	2.73762			Breast_SE_40_2	1	17065073	17085073
Breast_SE_1979_4	6	28919263	28939263	5.41513	5.94441	5.60096	5.75628	4.39484	2.69916	2.70284	2.75728	2.27948	2.47175	2.69397	2.52571	2.86024	2.47111	2.63028	2.37111			Breast_SE_40_3	1	17085073	17105073
Breast_SE_862_2	2	177206850	177226850	5.14603	5.36319	5.2271	5.56634	5.39861	2.70942	2.65894	2.74086	2.45003	2.23411	2.58947	2.55362	2.71478	2.61396	2.53096	2.57034			Breast_SE_40_4	1	17105073	17125073
Breast_SE_4323_11	15	63486627	63506627	5.00606	6.05224	7.00445	5.97847	4.94187	2.52154	2.89741	2.57333	2.56955	2.56434	2.5302	2.21524	2.7689	2.70575	2.31092	2.7574			Breast_SE_40_5	1	17125073	17145073
Breast_SE_807_1	2	131091574	131111574	5.22816	5.7397	5.42892	5.32445	5.33234	2.54833	2.66103	2.65274	2.45283	2.25961	2.54761	2.4903	2.7252	2.77863	2.48826	2.51069			Breast_SE_40_6	1	17145073	17165073
Breast_SE_323_4	1	156500801	156520801	5.94243	5.3243	6.3594	5.37911	6.4333	2.77577	2.82754	2.96028	2.52736	2.35429	2.73179	2.74438	2.97538	2.89606	2.83726	2.58087			Breast_SE_40_7	1	17165073	17185073
Breast_SE_12_3	1	8876971	8896971	6.0764	5.7217	5.87379	6.22914	6.20031	3.19674	2.89101	2.95669	2.68994	2.927	2.95226	3.04044	2.90718	2.73452	2.80658	2.51951			Breast_SE_40_8	1	17185073	17205073
Breast_SE_3487_3	11	57665723	57685723	5.78324	5.50693	5.8353	5.25521	4.88205	2.70532	2.68245	2.76403	2.46021	2.58033	2.61905	2.43858	2.70785	2.65916	2.70054	2.33739			Breast_SE_40_9	1	17205073	17225073
Breast_SE_2511_2	7	143276998	143296998	4.47848	3.93509	4.81227	4.48686	4.96061	2.42085	2.76609	2.48444	1.52319	2.34794	2.31011	2.12247	2.4574	2.36319	2.54381	2.22458			Breast_SE_40_10	1	17225073	17245073
Breast_SE_5082_7	19	40441294	40461294	5.51541	5.97103	4.87932	3.92053	4.81223	2.67669	2.67825	2.52122	1.79647	2.63486	2.58092	2.22444	2.57421	2.4012	2.5526	2.63152			Breast_SE_40_11	1	17245073	17265073
Breast_SE_536_1	1	235494350	235514350	4.61829	5.93283	5.69282	5.77504	4.8044	2.75837	2.69576	2.78149	2.45729	2.38272	2.61642	2.71305	2.66719	2.6506	2.56125	2.62274			Breast_SE_40_12	1	17265073	17285073
Breast_SE_335_4	1	161118084	161138084	5.99159	5.08293	5.94206	5.04784	5.18682	2.67743	2.62344	2.68497	2.3343	2.67869	2.48718	2.49716	2.73338	2.72531	2.6022	2.57832			Breast_SE_40_13	1	17285073	17305073
Breast_SE_534_1	1	235494429	235514429	4.61829	5.93277	5.69043	5.7749	4.8044	2.75817	2.69576	2.78174	2.45729	2.38151	2.61718	2.71305	2.6669	2.64995	2.55981	2.6232			Breast_SE_40_14	1	17305073	17325073
Breast_SE_537_1	1	235494710	235514710	4.62025	5.93421	5.69279	5.76862	4.79733	2.75853	2.69625	2.7817	2.45616	2.37699	2.61718	2.71385	2.66905	2.64799	2.56075	2.61985			Breast_SE_41_1	1	17368699	17388699
Breast_SE_414_4	1	201163199	201183199	2.37475	3.51205	4.78056	3.60703	5.83216	2.20043	2.60895	0	0	0	0	0	1.0001	0.593814	0	2.06361			Breast_SE_41_2	1	17388699	17408699
Breast_SE_535_1	1	235494580	235514580	4.61812	5.93352	5.68963	5.77243	4.80017	2.75916	2.69625	2.78153	2.45671	2.38354	2.61638	2.71332	2.66781	2.64961	2.5611	2.6214			Breast_SE_41_3	1	17408699	17428699
Breast_SE_1900_5	5	181228588	181248588	6.61475	5.5548	6.18559	6.25666	5.6191	3.0561	2.89176	3.01187	2.55389	2.76905	2.89662	2.9332	3.04721	2.98163	2.87515	2.70806			Breast_SE_41_4	1	17428699	17448699
Breast_SE_1993_3	6	33286745	33306745	6.39031	6.17319	6.44516	4.94694	5.33446	2.87104	2.7471	2.76002	2.71886	2.60052	2.81346	2.75543	2.9196	2.6942	2.92628	2.61719			Breast_SE_41_5	1	17448699	17468699
Breast_SE_3401_3	11	9566934	9586934	5.88846	6.83426	6.87072	6.1068	4.88524	2.90303	2.81798	2.69683	2.80009	2.75616	2.80655	2.63468	2.89026	2.73179	2.67341	2.72205			Breast_SE_42_1	1	17482473	17502473
Breast_SE_3740_1	12	45713843	45733843	5.68198	6.12204	6.47233	5.62056	4.93876	2.79941	2.85986	2.79425	2.69841	2.52019	2.73288	2.6243	2.76077	2.72453	2.61568	2.62459			Breast_SE_42_2	1	17502473	17522473
Breast_SE_4870_14	17	82448269	82468269	5.09004	5.84111	6.19299	5.25851	4.6056	2.73943	2.67034	2.77556	2.44659	2.29851	2.64514	2.74886	2.63687	2.58575	2.63341	2.56052			Breast_SE_42_3	1	17522473	17542473
Breast_SE_4183_9	14	77022561	77042561	7.46822	7.20442	8.44624	5.36048	5.98312	3.0572	3.11852	3.20124	2.99593	2.77201	3.09552	3.03834	3.11328	2.97596	3.00196	2.74523			Breast_SE_42_4	1	17542473	17562473
Breast_SE_3811_1	12	69350059	69370059	3.96958	4.71216	4.96725	5.08484	4.30625	2.42146	2.40178	2.0812	2.03033	2.08194	2.28548	1.94042	2.25517	2.35246	1.98103	2.41158			Breast_SE_42_5	1	17562473	17582473
Breast_SE_4111_3	14	49880846	49900846	5.92422	5.83707	6.08399	5.57244	4.56623	2.80675	2.77418	2.89709	2.47223	2.26196	2.71788	2.61785	2.91219	2.39099	2.51521	2.573			Breast_SE_42_6	1	17582473	17602473
Breast_SE_1280_1	3	155851384	155871384	6.08256	5.88422	6.12995	5.2428	5.02342	2.7462	2.71961	2.86115	2.64076	2.12233	2.7397	2.6297	2.6386	2.59296	2.61006	2.52055			Breast_SE_42_7	1	17602473	17622473
Breast_SE_579_2	2	9551062	9571062	4.90396	5.19754	5.55165	4.99227	5.35534	2.80466	2.52636	2.8169	2.26373	2.4602	2.67244	2.61098	2.71247	2.80959	2.56641	2.28371			Breast_SE_42_8	1	17622473	17642473
Breast_SE_1900_4	5	181208588	181228588	5.04528	4.91722	5.43799	5.25089	5.28649	2.75345	2.64849	2.82608	1.70882	2.8041	2.65379	2.88633	2.73819	2.66567	2.47422	2.54438			Breast_SE_42_9	1	17642473	17662473
Breast_SE_4714_1	17	39448456	39468456	5.924	4.61734	6.36039	5.18957	4.93593	2.66564	2.38467	2.57382	1.23365	1.32131	2.49751	2.61908	2.6689	2.24669	2.30239	2.45085			Breast_SE_42_10	1	17662473	17682473
Breast_SE_1813_3	5	139280569	139300569	5.42919	5.07091	5.43789	5.18412	5.06006	2.78374	2.6826	2.75987	2.35012	2.16336	2.64894	2.56919	2.67085	2.63985	2.65441	2.31407			Breast_SE_42_11	1	17682473	17702473
Breast_SE_4639_4	17	7843751	7863751	5.58204	6.28006	6.10881	6.15649	5.50115	2.98977	2.90818	2.92543	2.72411	2.30461	2.88528	2.83415	2.82827	2.93029	2.61347	2.4486			Breast_SE_43_1	1	17737324	17757324
Breast_SE_1956_1	6	17692672	17712672	5.60185	5.42335	5.76921	5.96801	5.39609	2.7873	2.72708	2.76255	2.61094	2.30474	2.73923	2.63005	2.7932	2.60055	2.72901	2.32894			Breast_SE_43_2	1	17757324	17777324
Breast_SE_351_2	1	167920561	167940561	5.20731	5.11799	5.51971	6.21047	5.4842	2.75085	2.7369	2.7207	2.3662	2.46893	2.55932	2.59174	2.66016	2.71179	2.63685	2.5145			Breast_SE_43_3	1	17777324	17797324
Breast_SE_3528_6	11	72068565	72088565	5.55537	6.05468	5.6802	3.68001	4.93452	2.43204	2.41951	2.36753	1.67157	2.82552	2.5174	2.38439	2.78607	2.13616	2.58428	2.57012			Breast_SE_44_1	1	17840198	17860198
Breast_SE_3703_1	12	22616408	22636408	4.33038	5.2304	4.73417	4.52112	5.66396	2.44403	2.47819	2.62778	0.606443	1.3147	2.34785	2.15658	2.58707	2.30279	2.15109	2.3301			Breast_SE_44_2	1	17860198	17880198
Breast_SE_4435_8	16	2006000	2026000	5.30561	6.71126	6.09856	5.97627	5.63878	2.70705	2.83991	2.88429	2.8734	2.0764	2.7326	2.61596	2.82455	2.85443	2.68229	2.65432			Breast_SE_45_1	1	18456803	18476803
Breast_SE_2760_12	8	102790987	102810987	6.86056	6.14488	5.44419	6.73666	6.8746	3.04432	2.65133	3.03797	2.66192	2.91795	3.01558	2.87926	2.92175	2.63318	2.7789	2.39836			Breast_SE_45_2	1	18476803	18496803
Breast_SE_306_6	1	152035014	152055014	5.80469	4.93281	6.07439	5.25558	5.71907	2.88933	2.64503	2.7662	2.18161	3.00972	2.64507	2.63597	2.91543	2.80393	2.7149	2.70451			Breast_SE_46_1	1	18866154	18886154
Breast_SE_5097_22	19	45433827	45453827	5.45678	6.23173	5.27064	5.50501	6.01461	2.56619	2.56149	2.62358	2.81321	2.58584	2.63139	2.05484	2.49687	2.37605	2.79593	2.37806			Breast_SE_46_2	1	18886154	18906154
Breast_SE_5448_10	22	40645867	40665867	4.86927	4.21113	5.43712	4.76946	5.29117	2.86535	2.67462	2.85456	2.04982	2.55462	2.76793	2.73324	2.45958	2.13059	2.59395	2.27836			Breast_SE_46_3	1	18906154	18926154
Breast_SE_3505_7	11	65101557	65121557	5.58772	5.92373	6.26761	4.79095	5.26979	2.73843	2.91906	2.65659	2.39446	1.71072	2.38281	2.4165	2.70937	2.62912	2.93322	2.50301			Breast_SE_46_4	1	18926154	18946154
Breast_SE_4851_4	17	74976827	74996827	5.62628	5.87832	7.04836	5.48254	4.76375	2.30744	2.87014	2.68753	2.35019	2.85248	2.50188	2.6588	2.64836	2.4765	2.67512	2.73696			Breast_SE_46_5	1	18946154	18966154
Breast_SE_318_1	1	155552816	155572816	5.71422	5.47168	5.49747	5.81795	5.70838	2.77728	2.73445	2.73884	2.54444	2.25811	2.61528	2.70792	2.74561	2.7674	2.73228	2.61479			Breast_SE_46_6	1	18966154	18986154
Breast_SE_2333_1	7	39936447	39956447	5.59106	6.28313	6.66412	5.46066	4.99346	2.90658	2.9247	2.93592	2.73155	2.50257	2.85088	2.89036	2.85879	2.70759	2.83532	2.74848			Breast_SE_46_7	1	18986154	19006154
Breast_SE_3383_13	11	498688	518688	4.98829	6.03147	6.02123	5.88628	5.25482	2.86399	2.77946	2.66653	2.48155	1.93278	2.68815	2.49584	2.79226	2.7562	2.63325	1.92443			Breast_SE_46_8	1	19006154	19026154
Breast_SE_1975_2	6	27132003	27152003	6.72062	5.90068	5.68945	6.71505	4.72777	2.87888	2.78017	2.88111	1.85439	3.00865	2.83533	2.74143	2.82732	2.0847	2.61544	2.90924			Breast_SE_47_1	1	19022375	19042375
Breast_SE_4077_1	14	31197591	31217591	5.88101	5.93042	6.02916	5.61882	4.89502	2.70966	2.79514	2.73603	2.57905	2.41029	2.66435	2.59116	2.72648	2.73239	2.4564	2.4959			Breast_SE_47_2	1	19042375	19062375
Breast_SE_1744_2	5	91371586	91391586	5.09842	5.00545	4.97939	5.55522	4.90109	2.90745	2.6015	2.63628	1.62199	2.86193	2.53966	2.20997	2.77152	2.40944	2.32239	2.57302			Breast_SE_47_3	1	19062375	19082375
Breast_SE_1073_3	3	39140088	39160088	6.65544	6.04806	6.06795	4.77323	5.31702	2.76681	2.48584	2.88626	2.5072	2.76939	2.83691	2.69678	2.77088	2.73365	2.78615	2.46905			Breast_SE_47_4	1	19082375	19102375
Breast_SE_4076_2	14	31199915	31219915	5.87095	5.93399	6.02435	5.62645	4.87826	2.70697	2.79521	2.73723	2.57788	2.41532	2.67002	2.58989	2.72155	2.73	2.46087	2.49842			Breast_SE_48_1	1	19196182	19216182
Breast_SE_5135_4	19	57805993	57825993	4.96946	5.94488	6.49044	4.90037	4.21747	2.54634	2.57054	2.14011	0	2.06385	2.41484	1.99127	2.60038	1.83539	2.53038	2.14584			Breast_SE_48_2	1	19216182	19236182
Breast_SE_5083_10	19	40738055	40758055	5.5418	6.2561	4.82527	5.62279	5.5334	2.7834	2.86129	2.62378	0.637164	2.82246	2.59907	2.09736	2.78016	2.11185	2.69554	2.68015			Breast_SE_48_3	1	19236182	19256182
Breast_SE_2855_3	8	144783717	144803717	5.26899	7.68097	6.73231	5.82878	6.24075	3.13322	2.96571	3.08808	2.90826	1.66151	3.03658	2.96051	2.98758	3.10483	2.82605	2.66604			Breast_SE_49_1	1	19299290	19319290
Breast_SE_4079_1	14	31197702	31217702	5.88012	5.92966	6.02855	5.6164	4.89109	2.70933	2.79527	2.73649	2.57905	2.40675	2.66368	2.59074	2.72648	2.73214	2.45567	2.49704			Breast_SE_49_2	1	19319290	19339290
Breast_SE_3500_26	11	62773572	62793572	6.0385	5.92904	5.923	5.27694	4.61389	2.81157	2.8027	2.88275	2.41136	2.274	2.73238	2.62181	2.7823	2.68439	2.67672	2.39445			Breast_SE_49_3	1	19339290	19359290
Breast_SE_4078_1	14	31197873	31217873	5.88108	5.9296	6.02792	5.61865	4.88589	2.70885	2.7956	2.73645	2.57831	2.41068	2.66398	2.59031	2.7264	2.73142	2.45557	2.49618			Breast_SE_49_4	1	19359290	19379290
Breast_SE_3505_25	11	65461557	65481557	7.03566	5.18972	7.48481	6.38681	6.73258	3.0983	2.89833	3.07192	2.6081	2.64115	2.86878	2.85443	3.00304	2.93661	2.93263	2.39982			Breast_SE_49_5	1	19379290	19399290
Breast_SE_1724_3	5	75326997	75346997	3.9941	4.27846	4.57017	3.65925	4.30419	2.68556	2.43801	2.50172	1.6414	2.02592	2.27801	2.04818	2.47293	2.10496	2.10015	1.94448			Breast_SE_49_6	1	19399290	19419290
Breast_SE_3502_29	11	64302048	64322048	6.33092	5.62983	6.22841	6.25997	6.30135	2.93813	2.922	3.06004	2.70469	2.81416	2.84516	2.76692	2.94807	3.05991	2.94621	2.5907			Breast_SE_49_7	1	19419290	19439290
Breast_SE_4710_2	17	38814678	38834678	4.87474	4.28236	5.76415	4.99108	5.11862	2.45822	2.35215	2.26009	0	1.82198	2.18178	2.15924	2.43089	1.49817	1.77388	2.18794			Breast_SE_49_8	1	19439290	19459290
Breast_SE_1431_3	4	39524547	39544547	5.22739	6.44878	5.52818	5.31558	4.44223	2.80394	2.55082	2.7373	1.39865	2.42905	2.6773	2.47362	2.76054	2.46848	2.0626	1.70439			Breast_SE_49_9	1	19459290	19479290
Breast_SE_5110_8	19	48986906	49006906	5.30083	4.50441	4.55971	4.75784	5.92355	2.77673	2.84194	2.31652	1.60903	1.72554	2.5942	2.17158	2.63494	2.40104	2.50105	2.15912			Breast_SE_49_10	1	19479290	19499290
Breast_SE_2924_1	9	35062037	35082037	5.19244	5.23785	5.81063	5.74547	5.19463	2.91768	2.83682	2.85788	2.24393	1.7071	2.68248	2.52236	2.74572	2.66945	2.79735	2.51989			Breast_SE_49_11	1	19499290	19519290
Breast_SE_1580_1	4	169602804	169622804	4.71265	5.41103	5.39618	4.91387	4.89118	2.39892	2.24571	2.40461	0	2.33988	2.06082	2.0961	2.56935	1.58623	1.51579	2.13746			Breast_SE_49_12	1	19519290	19539290
Breast_SE_3066_5	9	124845652	124865652	4.91766	5.05097	4.74202	5.07742	4.98196	2.87912	2.74929	2.56794	2.08704	2.17978	2.57669	2.63975	2.75302	2.43222	2.29417	2.24393			Breast_SE_50_1	1	19609594	19629594
Breast_SE_3670_3	12	6529985	6549985	6.12633	5.94347	5.78259	6.86778	6.13455	3.0079	3.01768	3.06102	2.63894	2.72925	2.99481	2.83294	3.07051	3.02982	2.70432	2.7928			Breast_SE_50_2	1	19629594	19649594
Breast_SE_995_1	2	241306528	241326528	5.71312	5.59481	5.36396	5.41761	5.13049	2.74407	2.75708	2.82593	2.45515	2.10477	2.69085	2.48966	2.68079	2.71717	2.59759	2.3548			Breast_SE_50_3	1	19649594	19669594
Breast_SE_3295_1	10	99608189	99628189	4.61756	5.41376	5.15588	5.43626	4.84524	2.86593	2.65254	2.72868	2.2265	1.86927	2.63501	2.42669	2.73476	2.53141	2.26171	2.35041			Breast_SE_51_1	1	19744660	19764660
Breast_SE_319_1	1	155555128	155575128	5.69843	5.44472	5.47454	5.8064	5.69712	2.77733	2.73456	2.74151	2.54405	2.24782	2.61849	2.70682	2.74916	2.7666	2.72863	2.61038			Breast_SE_51_2	1	19764660	19784660
Breast_SE_2260_13	7	5515590	5535590	6.03977	5.95469	7.59081	5.83585	5.81249	3.02374	2.97977	2.91735	2.9075	2.31034	2.88198	2.88306	2.86216	2.95235	2.87542	2.7804			Breast_SE_51_3	1	19784660	19804660
Breast_SE_582_3	2	10109022	10129022	5.20454	5.49637	6.20346	6.05633	5.02008	2.80806	2.86288	2.942	2.52185	2.57872	2.89635	2.69785	2.71296	2.82703	2.71345	2.53856			Breast_SE_51_4	1	19804660	19824660
Breast_SE_67_1	1	23939876	23959876	3.76195	4.6056	4.91419	4.19795	5.1936	2.54822	2.68663	2.6511	2.14963	2.29082	2.61821	2.42221	2.57004	2.43965	2.4257	2.53533			Breast_SE_52_1	1	20140135	20160135
Breast_SE_4662_3	17	18175950	18195950	5.38232	6.70905	5.30989	5.75534	5.68329	2.92404	2.82853	2.89988	2.73328	2.31051	2.90233	2.79822	2.80301	2.72097	2.58699	2.43711			Breast_SE_52_2	1	20160135	20180135
Breast_SE_233_1	1	100034027	100054027	5.94081	5.21408	4.98084	5.19818	5.67078	2.65858	2.5526	2.55149	2.39881	2.35744	2.47301	2.38261	2.63339	2.44259	2.53038	1.9831			Breast_SE_52_3	1	20180135	20200135
Breast_SE_5462_7	22	42607322	42627322	5.82843	5.32134	5.346	4.9236	5.0413	2.8263	2.71849	2.79239	2.39323	2.3077	2.68108	2.64652	2.55395	2.69752	2.74825	2.40738			Breast_SE_52_4	1	20200135	20220135
Breast_SE_1109_3	3	51968126	51988126	5.73876	5.60565	5.70248	6.42835	5.01796	2.83824	2.90336	2.96928	2.36154	2.24663	2.84321	2.49027	2.893	2.76438	2.59787	2.63416			Breast_SE_52_5	1	20220135	20240135
Breast_SE_4002_1	13	51790100	51810100	4.7176	5.02954	4.77703	3.84043	4.33586	2.29826	2.22411	2.38044	1.55086	0.734667	2.14154	1.93065	2.09312	1.97838	1.74571	2.28854			Breast_SE_53_1	1	20466593	20486593
Breast_SE_729_6	2	74464957	74484957	5.75944	5.84365	6.23361	5.07695	4.81127	2.82033	2.8544	2.80599	2.31571	1.90665	2.89371	2.77855	2.83428	2.72519	2.54893	2.57247			Breast_SE_53_2	1	20486593	20506593
Breast_SE_4495_6	16	30615955	30635955	2.93238	6.19292	6.21567	3.79413	4.00395	2.34967	2.21019	2.54402	0	1.55937	2.02528	1.97062	2.22721	1.17673	1.6045	2.64478			Breast_SE_53_3	1	20506593	20526593
Breast_SE_1911_3	6	2970239	2990239	5.83061	5.80398	5.52869	5.31346	5.95746	2.80204	2.65258	2.77646	2.71484	2.72603	2.84218	2.74698	2.88252	2.61719	2.74423	2.45406			Breast_SE_54_1	1	20567838	20587838
Breast_SE_1058_1	3	31522695	31542695	5.42876	5.76864	5.23011	5.34951	4.84868	2.73383	2.76685	2.79556	2.43616	2.34927	2.73076	2.7009	2.6957	2.50154	2.35782	2.45311			Breast_SE_54_2	1	20587838	20607838
Breast_SE_1059_1	3	31522802	31542802	5.42857	5.76779	5.22902	5.34951	4.84728	2.73339	2.76685	2.79556	2.43677	2.34927	2.73071	2.70062	2.69519	2.50149	2.35712	2.45461			Breast_SE_54_3	1	20607838	20627838
Breast_SE_1396_4	4	6707139	6727139	5.22989	5.33427	4.9298	4.82105	4.13523	2.44451	2.36775	2.26252	1.89714	1.83808	2.33648	2.19884	2.52463	2.58009	2.37276	2.3546			Breast_SE_54_4	1	20627838	20647838
Breast_SE_2592_4	8	30710973	30730973	4.73429	5.4529	4.96877	5.27444	4.39362	2.35078	2.56255	2.61832	1.67579	2.68653	2.02331	2.28897	2.48711	2.10907	2.65707	2.71619			Breast_SE_55_1	1	20708802	20728802
Breast_SE_2665_1	8	63158386	63178386	5.29086	5.60236	5.47845	4.70628	4.66645	2.78173	2.63984	2.70278	2.26767	2.05802	2.66026	2.56522	2.54765	2.62175	2.30605	2.44935			Breast_SE_55_2	1	20728802	20748802
Breast_SE_3505_6	11	65081557	65101557	5.12823	5.38399	5.41765	4.64633	5.00493	2.7183	2.66261	2.74898	1.68303	1.22593	2.59182	2.44722	2.64667	2.50256	2.51106	2.26143			Breast_SE_56_1	1	21212925	21232925
Breast_SE_3076_6	9	128649593	128669593	4.88993	4.63893	4.72663	4.3506	4.53174	2.66117	2.69072	2.39642	1.96481	2.34622	2.40246	2.41081	2.58525	2.53357	2.46971	2.3133			Breast_SE_56_2	1	21232925	21252925
Breast_SE_5055_1	19	34167947	34187947	5.8258	5.45167	5.18428	5.24877	5.1927	2.72874	2.77192	2.78132	2.39603	1.91941	2.71046	2.70557	2.69287	2.54147	2.64539	2.39943			Breast_SE_56_3	1	21252925	21272925
Breast_SE_2664_1	8	63158062	63178062	5.28498	5.60511	5.47747	4.71143	4.66639	2.78032	2.63919	2.70189	2.27165	2.04949	2.65859	2.56384	2.54625	2.62106	2.30605	2.4469			Breast_SE_56_4	1	21272925	21292925
Breast_SE_5017_4	19	12719018	12739018	6.4576	5.91138	6.19371	5.18446	5.86617	3.01675	2.89629	2.98445	2.67105	2.24205	2.86611	2.81932	2.88865	3.00154	2.87346	2.69121			Breast_SE_56_5	1	21292925	21312925
Breast_SE_3253_2	10	73724390	73744390	4.64059	4.71326	5.05871	4.72538	4.25958	2.61778	2.44149	2.42532	1.54612	2.08139	2.30338	2.18132	2.76713	2.55091	2.36062	2.42806			Breast_SE_56_6	1	21312925	21332925
Breast_SE_4490_5	16	29801206	29821206	6.72156	6.37074	7.19273	5.68417	5.66862	3.16202	3.09028	3.1071	2.94827	2.69981	3.02341	2.97336	3.05729	3.09666	2.94636	2.85865			Breast_SE_56_7	1	21332925	21352925
Breast_SE_3296_1	10	99615279	99635279	4.59828	5.4057	5.17103	5.46465	4.93276	2.85963	2.65148	2.72957	2.30031	1.87203	2.63467	2.42212	2.72908	2.53794	2.27379	2.35307			Breast_SE_56_8	1	21352925	21372925
Breast_SE_5134_1	19	57272377	57292377	5.20748	5.38763	5.78646	4.74309	4.99681	2.72401	2.59011	2.51849	0	1.93594	2.61298	2.07061	2.65081	1.89963	2.10387	2.12405			Breast_SE_57_1	1	21485034	21505034
Breast_SE_1161_5	3	71567160	71587160	3.99488	6.18549	6.43502	4.84813	5.07072	2.36663	2.89222	2.33149	2.51713	2.67143	2.89328	2.41956	2.79563	2.77938	2.68559	2.53697			Breast_SE_57_2	1	21505034	21525034
Breast_SE_4852_3	17	75257216	75277216	5.9417	6.05271	6.14091	5.79726	4.75351	2.72233	2.88151	2.80654	2.27631	1.70282	2.68732	2.83707	2.80193	2.65488	2.79064	2.68328			Breast_SE_57_3	1	21525034	21545034
Breast_SE_5586_6	X	153961383	153981383	6.14337	6.31113	6.60671	6.17933	4.94516	3.03357	3.01118	2.95846	2.60916	2.52133	2.78912	2.81912	2.77055	3.0421	2.9256	2.65106			Breast_SE_58_1	1	21539664	21559664
Breast_SE_4640_9	17	8136633	8156633	2.48032	5.00436	5.77546	4.8138	5.98119	2.51004	2.76045	2.37257	2.42167	1.80016	2.59245	2.47118	2.47652	2.6369	2.43315	2.18007			Breast_SE_58_2	1	21559664	21579664
Breast_SE_1931_2	6	10392572	10412572	7.05614	5.99202	6.62878	5.01028	5.59014	3.07643	2.98411	2.82969	2.88293	2.96459	2.97309	2.79719	2.61848	2.31941	2.95706	2.87254			Breast_SE_58_3	1	21579664	21599664
Breast_SE_4986_33	19	1092244	1112244	5.95177	6.39875	6.38714	7.02597	5.47128	3.06498	2.96798	2.891	2.91383	2.6074	2.92863	2.80496	2.94524	2.89919	2.92694	2.68196			Breast_SE_58_4	1	21599664	21619664
Breast_SE_2867_4	9	3518498	3538498	6.12421	4.99635	5.85316	4.54604	4.93613	2.79772	2.75651	2.68055	1.92978	2.68454	2.62308	2.50619	2.76095	2.73302	2.28739	2.24867			Breast_SE_58_5	1	21619664	21639664
Breast_SE_5137_4	19	58551802	58571802	6.31305	6.15657	6.83994	5.58766	6.10583	2.96144	2.94009	2.84502	3.00777	2.19464	2.86689	2.52268	2.97162	2.93448	2.89364	2.55687			Breast_SE_58_6	1	21639664	21659664
Breast_SE_893_5	2	200806293	200826293	4.88192	5.37358	4.86864	5.24092	5.07292	2.64647	2.61174	2.78089	2.31669	2.25923	2.66008	2.47307	2.79925	2.60814	2.473	2.41999			Breast_SE_58_7	1	21659664	21679664
Breast_SE_4069_8	14	24187269	24207269	4.80642	5.44126	5.74232	5.51797	4.95428	2.79594	2.75538	2.77249	1.61339	1.14333	2.67758	2.52831	2.76285	2.5902	2.40923	2.42478			Breast_SE_59_1	1	21757196	21777196
Breast_SE_5098_6	19	45763012	45783012	7.38882	6.10032	6.09535	5.8461	5.81664	3.02499	3.03074	2.9646	2.89239	2.68917	3.01834	2.65752	2.90251	3.02376	3.02776	2.58368			Breast_SE_59_2	1	21777196	21797196
Breast_SE_5054_1	19	34156729	34176729	5.73561	5.40392	5.16505	5.3129	5.06322	2.71416	2.76556	2.77386	2.38662	1.9262	2.70591	2.70084	2.68474	2.51612	2.61377	2.39715			Breast_SE_60_1	1	21805396	21825396
Breast_SE_5271_1	20	49262797	49282797	5.43716	6.25252	4.7428	5.8879	6.10431	2.89168	2.69227	2.89662	2.52725	2.6127	2.71235	2.74245	2.82424	2.70067	2.72379	2.71375			Breast_SE_60_2	1	21825396	21845396
Breast_SE_531_14	1	235059178	235079178	6.43737	6.95078	8.25166	7.10331	6.54627	2.79388	2.40278	3.13255	1.89165	3.25306	2.76967	2.76018	2.82798	0	2.99405	2.87885			Breast_SE_60_3	1	21845396	21865396
Breast_SE_2629_1	8	43046874	43066874	5.20413	4.67089	4.92207	4.45112	4.24171	2.70358	2.53859	2.54932	1.97712	2.01972	2.55961	2.50833	2.47882	2.13514	2.03894	2.20446			Breast_SE_60_4	1	21865396	21885396
Breast_SE_4869_10	17	81972792	81992792	5.49763	6.07427	7.44612	5.05925	5.01536	2.37225	2.76001	2.70193	2.48131	2.43892	2.32742	2.60529	2.43597	2.67136	2.6281	2.85658			Breast_SE_60_5	1	21885396	21905396
Breast_SE_2607_1	8	38028128	38048128	5.95968	5.33189	5.31504	4.63409	4.13621	2.88095	2.74484	2.72908	1.82903	2.57268	2.84555	2.59467	2.72264	2.33584	2.67077	2.79328			Breast_SE_60_6	1	21905396	21925396
Breast_SE_5197_4	20	31568369	31588369	7.94677	5.7805	6.01113	6.69954	6.4176	3.06258	3.0591	2.6194	2.9013	2.79128	2.62286	2.84565	2.73779	2.61495	2.69831	2.46615			Breast_SE_60_7	1	21925396	21945396
Breast_SE_3894_4	12	113181584	113201584	5.62298	5.35813	5.17156	5.46126	4.66988	2.92134	2.7243	2.7848	1.88673	1.95371	2.82959	2.80214	2.95892	2.50465	2.63313	2.38058			Breast_SE_60_8	1	21945396	21965396
Breast_SE_4111_2	14	49860846	49880846	4.38596	4.38196	5.23325	4.88408	4.47337	2.48947	2.36158	2.60095	2.07345	2.51541	2.53536	2.26402	2.76072	1.92257	2.18552	2.30056			Breast_SE_60_9	1	21965396	21985396
Breast_SE_310_9	1	153614265	153634265	5.75375	5.4432	6.65615	4.39223	4.50656	2.74208	2.75595	2.54628	2.03777	2.74294	2.67254	2.67622	2.8009	2.40574	2.87487	2.75463			Breast_SE_60_10	1	21985396	22005396
Breast_SE_3502_27	11	64262048	64282048	6.40217	5.11916	6.10943	5.49185	6.25053	2.87863	2.87485	3.00981	2.56274	2.65759	2.85287	2.82999	2.92753	2.83256	2.74921	2.41268			Breast_SE_60_11	1	22005396	22025396
Breast_SE_2851_10	8	143940529	143960529	7.21173	8.88382	7.77564	5.86161	6.3685	3.29622	3.17955	3.33111	3.2731	2.54013	3.27866	3.27001	3.26278	3.35943	3.19578	2.69062			Breast_SE_60_12	1	22025396	22045396
Breast_SE_1432_8	4	40044977	40064977	5.73138	5.8033	5.8543	5.10408	5.34908	2.56094	2.92368	2.84714	2.60571	2.70097	2.58976	2.61357	2.75865	2.74669	2.59144	2.58362			Breast_SE_60_13	1	22045396	22065396
Breast_SE_5375_3	21	44864996	44884996	5.72556	5.19074	6.16312	4.30958	5.40966	2.86726	2.76168	2.59744	2.27143	2.40534	2.84014	2.87199	3.00054	2.52623	2.67734	2.23756			Breast_SE_60_14	1	22065396	22085396
Breast_SE_622_7	2	28378557	28398557	6.79529	7.17619	6.68079	5.64173	5.92247	3.03255	2.8321	3.0069	3.06958	2.61812	3.07675	3.03128	2.98137	3.01638	2.93781	2.58189			Breast_SE_61_1	1	22410330	22430330
Breast_SE_1327_1	3	184243375	184263375	5.4192	5.01545	4.85496	5.51771	4.43581	2.65063	2.50349	2.69864	1.26767	2.31976	2.6548	2.39057	2.62644	2.43695	2.03454	2.40618			Breast_SE_61_2	1	22430330	22450330
Breast_SE_1099_3	3	49112908	49132908	5.14701	4.95622	5.50635	4.66997	4.83147	2.78294	2.76816	2.75494	1.07492	2.11773	2.67721	2.60456	2.79056	2.49895	2.5019	2.33869			Breast_SE_61_3	1	22450330	22470330
Breast_SE_4540_3	16	67174186	67194186	5.49776	5.83442	6.25476	5.37149	5.01628	2.83615	2.6568	2.87671	2.61103	1.96927	2.62565	2.66762	2.70424	2.66788	2.77113	2.54084			Breast_SE_61_4	1	22470330	22490330
Breast_SE_2099_4	6	89075256	89095256	4.3253	5.61666	5.56263	4.93043	4.89006	2.71445	2.53596	2.82303	2.34384	2.10596	2.46323	2.64233	2.54672	2.68085	2.41473	2.33905			Breast_SE_61_5	1	22490330	22510330
Breast_SE_322_3	1	155921803	155941803	5.38426	4.12346	4.9904	4.72377	5.05298	2.64348	2.59941	2.52569	1.20858	2.33856	2.36175	2.36671	2.79529	2.2264	2.54097	2.51545			Breast_SE_62_1	1	22726274	22746274
Breast_SE_3512_3	11	66596852	66616852	5.26181	4.3883	4.62737	4.36961	4.44664	2.61755	2.50614	2.77071	1.59614	1.8384	2.59062	2.16673	2.37234	2.40049	2.52982	2.37593			Breast_SE_62_2	1	22746274	22766274
Breast_SE_3719_1	12	31308777	31328777	5.49073	5.86292	5.63863	6.03135	6.82844	2.68918	2.89664	2.69481	2.74282	1.76955	2.45513	2.55197	2.74143	2.78217	2.38281	2.32825			Breast_SE_62_3	1	22766274	22786274
Breast_SE_5034_3	19	18281132	18301132	5.65008	6.49193	5.27657	5.08252	6.30133	2.79592	3.01759	2.82959	2.67874	2.1308	2.72816	2.51522	2.79152	2.85652	2.82575	2.4399			Breast_SE_62_4	1	22786274	22806274
Breast_SE_1631_1	5	10342363	10362363	6.07998	6.00213	5.72066	5.05119	5.21539	2.66006	2.57946	2.69689	2.6291	2.01382	2.57006	2.621	2.53954	2.68675	2.61625	2.37475			Breast_SE_62_5	1	22806274	22826274
Breast_SE_5273_1	20	50920537	50940537	4.85565	5.8542	5.42611	4.91152	5.37318	2.55109	2.59432	2.70035	2.53405	2.2016	2.4556	2.56392	2.50103	2.73939	2.50687	2.5369			Breast_SE_62_6	1	22826274	22846274
Breast_SE_2852_4	8	144087661	144107661	5.49014	7.49942	6.62656	5.48104	5.57241	3.01865	2.92097	3.09309	2.76224	1.73576	2.94576	2.85903	2.90005	3.04161	2.70379	2.66944			Breast_SE_62_7	1	22846274	22866274
Breast_SE_3515_8	11	68113032	68133032	5.59871	5.55689	6.04079	5.57453	5.27379	2.5068	2.78404	2.61197	2.43106	2.43147	2.27685	2.21002	2.82254	2.77639	2.9977	2.74034			Breast_SE_62_8	1	22866274	22886274
Breast_SE_802_7	2	127689337	127709337	4.64341	4.77728	4.4942	4.5977	5.07859	2.21068	2.53999	2.28256	2.1856	2.40993	2.25668	1.97926	2.41095	2.26817	2.15124	2.31355			Breast_SE_63_1	1	23096017	23116017
Breast_SE_5024_3	19	16077139	16097139	5.95969	6.01279	5.1364	4.5702	6.17993	2.95452	2.6483	2.90897	2.12673	2.83057	2.84236	2.7829	2.83405	2.72858	3.01722	2.30336			Breast_SE_63_2	1	23116017	23136017
Breast_SE_2312_1	7	30586621	30606621	4.62439	5.09631	5.70476	5.05399	3.8518	2.76629	2.67642	2.6592	1.49869	2.08934	2.67883	2.56608	2.79094	2.28313	2.41435	2.38384			Breast_SE_64_1	1	23154670	23174670
Breast_SE_5274_1	20	50920710	50940710	4.85233	5.84736	5.42518	4.90935	5.3713	2.55066	2.59321	2.70083	2.53446	2.2016	2.4563	2.56253	2.50112	2.73965	2.50696	2.53648			Breast_SE_64_2	1	23174670	23194670
Breast_SE_1993_4	6	33306745	33326745	6.58151	5.63805	6.13451	5.01344	4.99375	3.01234	2.84286	3.00534	2.5228	2.59135	2.93811	2.8448	2.99974	2.79542	2.80979	2.5269			Breast_SE_64_3	1	23194670	23214670
Breast_SE_3500_31	11	62873572	62893572	6.23659	5.54315	5.8542	5.22658	4.23648	2.85624	2.82437	2.89782	1.64262	2.57692	2.76286	2.63153	2.88525	2.68373	2.59919	2.39799			Breast_SE_64_4	1	23214670	23234670
Breast_SE_5575_1	X	123950825	123970825	5.27344	5.22615	5.11256	5.57573	4.82078	2.84578	2.69625	2.70285	2.12203	2.50366	2.47689	2.75937	2.70847	2.64378	2.53678	2.33357			Breast_SE_65_1	1	23323551	23343551
Breast_SE_4787_6	17	60586434	60606434	4.9339	4.64294	4.7185	5.04697	4.48135	2.54745	2.64528	2.51596	1.55278	1.68038	2.49835	2.64535	2.56904	2.30478	2.1644	2.21833			Breast_SE_65_2	1	23343551	23363551
Breast_SE_4503_2	16	48365301	48385301	4.82349	4.89892	4.78282	4.87361	5.36787	2.35007	2.56194	2.33054	2.40993	2.39248	2.37371	2.09912	2.46774	2.3392	2.35941	2.28007			Breast_SE_65_3	1	23363551	23383551
Breast_SE_930_10	2	218392286	218412286	6.15901	6.81022	6.17134	6.5871	5.82867	2.85721	3.09625	3.01253	2.97477	2.10642	2.94785	2.98212	2.96536	2.97394	2.95273	2.75947			Breast_SE_65_4	1	23383551	23403551
Breast_SE_301_3	1	151281199	151301199	5.70245	5.35564	5.93157	5.60383	5.18636	2.81105	2.80119	2.78815	2.41366	1.92833	2.62215	2.65853	2.72357	2.84328	2.73561	2.63916			Breast_SE_65_5	1	23403551	23423551
Breast_SE_1808_2	5	138455900	138475900	4.2853	5.88926	6.39689	5.46147	4.95407	2.73784	2.64028	2.70038	2.48732	1.24248	2.57155	2.47848	2.56727	2.51879	2.68618	2.45596			Breast_SE_65_6	1	23423551	23443551
Breast_SE_4157_20	14	68812182	68832182	4.82729	4.95207	5.89004	4.37162	5.02916	2.57984	2.98109	3.01876	2.26524	2.28924	2.57263	2.77867	2.66183	2.30455	2.80951	2.44865			Breast_SE_65_7	1	23443551	23463551
Breast_SE_3813_1	12	70233632	70253632	4.87326	4.94949	5.41106	5.17577	4.2492	2.62095	2.63336	2.35367	2.05121	2.12794	2.44694	2.33083	2.61197	2.5749	2.14792	2.35238			Breast_SE_65_8	1	23463551	23483551
Breast_SE_5460_2	22	42078847	42098847	5.0887	6.13643	5.79679	5.12385	4.90467	2.68399	2.69794	2.75594	0	1.72423	2.67077	2.55834	2.493	2.12104	2.30684	2.32637			Breast_SE_65_9	1	23483551	23503551
Breast_SE_2095_1	6	85628211	85648211	5.40839	6.19837	5.88575	5.84176	5.32245	2.90636	2.92682	2.71585	2.76406	2.47511	2.77194	2.76008	2.77272	2.915	2.91017	2.48249			Breast_SE_65_10	1	23503551	23523551
Breast_SE_3721_1	12	31314880	31334880	5.4669	5.85336	5.64544	6.01098	6.76126	2.69306	2.89198	2.69751	2.74812	1.74979	2.45384	2.55146	2.74413	2.77946	2.39142	2.29265			Breast_SE_65_11	1	23523551	23543551
Breast_SE_3722_1	12	31314922	31334922	5.46562	5.85256	5.64461	6.01111	6.75981	2.69306	2.89209	2.69751	2.74773	1.74979	2.45384	2.55146	2.74413	2.77926	2.39053	2.2931			Breast_SE_65_12	1	23543551	23563551
Breast_SE_3720_1	12	31314939	31334939	5.46562	5.85256	5.64461	6.01111	6.76089	2.69306	2.89209	2.69774	2.74773	1.74979	2.45384	2.55146	2.74413	2.77926	2.39053	2.2931			Breast_SE_65_13	1	23563551	23583551
Breast_SE_2752_1	8	101195499	101215499	5.54276	6.30413	5.87018	5.32153	4.32389	2.75068	2.63642	2.64119	2.49452	2.03765	2.72503	2.57472	2.66981	2.52334	2.56377	2.4657			Breast_SE_65_14	1	23583551	23603551
Breast_SE_2754_1	8	101195843	101215843	5.54137	6.29727	5.8652	5.31251	4.32383	2.74937	2.63431	2.64096	2.49111	2.02974	2.7245	2.57294	2.67057	2.52334	2.56249	2.46474			Breast_SE_65_15	1	23603551	23623551
Breast_SE_3164_3	10	21522783	21542783	6.54411	5.23987	6.51186	6.35581	6.23523	2.93475	2.75005	2.85818	2.63337	1.83209	2.76955	2.59778	2.78355	2.92025	2.59101	2.37488			Breast_SE_65_16	1	23623551	23643551
Breast_SE_2751_1	8	101195402	101215402	5.54155	6.30529	5.87229	5.32174	4.31803	2.75088	2.63672	2.64082	2.49404	2.04645	2.7253	2.57561	2.66981	2.52387	2.56377	2.46644			Breast_SE_66_1	1	23772988	23792988
Breast_SE_2151_1	6	118885192	118905192	5.00817	5.11466	5.09641	5.73968	5.05067	2.6853	2.65252	2.86768	2.12727	2.37886	2.48486	2.43828	2.57906	2.64326	2.49157	2.02496			Breast_SE_66_2	1	23792988	23812988
Breast_SE_2753_1	8	101195441	101215441	5.54267	6.30471	5.87091	5.32265	4.31803	2.75068	2.63672	2.64119	2.49404	2.04592	2.72503	2.57561	2.66948	2.52387	2.56334	2.46618			Breast_SE_67_1	1	23939876	23959876
Breast_SE_2710_1	8	81714385	81734385	5.22009	5.88802	5.73712	4.3404	3.67076	2.13947	2.29541	1.89269	0	2.25912	2.0207	2.12404	2.53966	1.34669	1.9124	2.03386			Breast_SE_67_2	1	23959876	23979876
Breast_SE_2431_3	7	100112848	100132848	5.32997	4.80579	5.74113	5.09563	4.67408	2.87193	2.85839	2.92926	2.23088	2.5301	2.81697	2.67057	2.7989	2.68593	2.61636	2.62086			Breast_SE_67_3	1	23979876	23999876
Breast_SE_5435_15	22	36451135	36471135	6.54808	5.76199	7.16745	4.24529	4.96152	3.00829	2.81758	3.06499	1.7624	2.65942	3.08665	2.83686	2.8796	2.38184	2.91725	2.30256			Breast_SE_67_4	1	23999876	24019876
Breast_SE_3519_2	11	68267949	68287949	4.39136	5.20639	5.12148	5.27219	5.20554	2.58609	2.44429	2.63633	1.88614	0.672946	2.61546	2.31415	2.60028	2.04391	2.28764	2.29784			Breast_SE_67_5	1	24019876	24039876
Breast_SE_3002_1	9	96407782	96427782	5.46406	5.48818	5.51495	6.14082	5.31863	2.85068	2.84612	2.74175	2.58837	2.43445	2.6619	2.20573	2.74733	2.72923	2.67443	2.3063			Breast_SE_67_6	1	24039876	24059876
Breast_SE_5352_2	21	39313665	39333665	4.81431	5.55895	5.98272	3.99972	4.95035	2.52167	2.61331	2.54294	2.16542	2.97599	2.56501	2.56902	2.44553	2.2655	2.8116	2.56781			Breast_SE_68_1	1	24064526	24084526
Breast_SE_366_2	1	173866814	173886814	4.71917	4.81036	5.75706	5.10314	4.70522	2.62801	2.5753	2.6516	2.37063	2.38557	2.45516	2.40914	2.54367	2.55796	2.5542	2.4808			Breast_SE_68_2	1	24084526	24104526
Breast_SE_316_6	1	154996696	155016696	6.99319	6.6048	7.48941	6.94319	5.49251	3.01346	3.01588	3.08246	2.97452	2.71961	2.76534	2.71507	2.99837	3.19658	3.16018	3.03683			Breast_SE_68_3	1	24104526	24124526
Breast_SE_5145_1	20	2093781	2113781	6.83455	5.85603	4.96434	5.16827	5.10604	2.84637	2.8042	2.77792	2.34452	2.29922	2.79809	2.72376	2.76928	2.72542	2.52369	2.2781			Breast_SE_69_1	1	24258440	24278440
Breast_SE_2852_3	8	144067661	144087661	5.19377	6.73385	6.78125	5.3256	5.00778	2.98759	2.85111	3.01587	2.63947	2.11816	2.90581	2.83072	2.86774	2.97652	2.61998	2.5555			Breast_SE_69_2	1	24278440	24298440
Breast_SE_1685_4	5	55988040	56008040	4.8425	4.37573	5.10826	5.40227	4.53114	2.63496	2.45017	2.59831	1.73499	1.86428	2.63246	2.33322	2.69656	2.30486	2.17735	1.89562			Breast_SE_69_3	1	24298440	24318440
Breast_SE_2750_2	8	101194084	101214084	5.5171	6.30829	5.87774	5.31765	4.31582	2.75194	2.63917	2.64	2.49553	1.98513	2.72259	2.57959	2.67711	2.52481	2.56347	2.4766			Breast_SE_69_4	1	24318440	24338440
Breast_SE_7_2	1	6593178	6613178	5.96289	6.10323	5.21511	6.46282	5.21327	2.84104	2.91743	2.849	2.68971	2.57562	2.91182	2.54633	2.88124	2.50229	2.60938	2.48362			Breast_SE_70_1	1	24361195	24381195
Breast_SE_4733_2	17	42968750	42988750	5.03173	4.68539	4.3767	3.47624	4.53733	2.29616	2.41598	2.41652	0.753175	2.1537	2.28711	1.88013	2.54997	1.85641	2.19362	2.28558			Breast_SE_70_2	1	24381195	24401195
Breast_SE_182_1	1	62418257	62438257	5.33944	5.57779	5.61897	5.63852	5.10457	2.84363	2.91137	2.73584	2.55728	2.4488	2.81332	2.67598	2.70266	2.8359	2.79186	2.33046			Breast_SE_70_3	1	24401195	24421195
Breast_SE_2096_1	6	85633688	85653688	5.36012	6.20334	5.88828	5.83084	5.26121	2.90351	2.92386	2.71108	2.76671	2.4865	2.7707	2.76207	2.76085	2.91401	2.90896	2.48973			Breast_SE_71_1	1	24527731	24547731
Breast_SE_2838_4	8	140496169	140516169	4.80186	6.51189	6.03461	5.42853	5.37276	2.86538	2.75888	2.89477	2.64237	1.47322	2.81266	2.66223	2.69148	2.78873	2.50764	2.42841			Breast_SE_71_2	1	24547731	24567731
Breast_SE_3642_2	11	129999550	130019550	5.2236	5.79303	5.53692	6.10664	5.23722	2.81548	2.80622	2.84401	2.70345	2.56158	2.62993	2.33194	2.80133	2.64853	2.74065	2.42666			Breast_SE_71_3	1	24567731	24587731
Breast_SE_3179_1	10	27146370	27166370	5.79837	5.51531	5.94602	5.52097	5.46365	2.82051	2.61648	2.63831	0.0622463	2.40078	2.44823	2.21433	2.73963	2.389	2.13926	2.40012			Breast_SE_71_4	1	24587731	24607731
Breast_SE_46_2	1	18886154	18906154	3.40784	4.4091	5.01784	4.32265	3.47175	2.07457	2.00933	1.85059	0	2.08033	2.11313	1.08679	1.60521	0	1.50358	2.48189			Breast_SE_71_5	1	24607731	24627731
Breast_SE_4815_2	17	64503907	64523907	5.67532	6.07205	6.40319	5.59879	5.12592	2.69105	2.74247	2.65924	0	2.33796	2.59685	2.72506	2.73894	2.12619	1.91382	2.57439			Breast_SE_72_1	1	24634959	24654959
Breast_SE_1378_2	4	1698018	1718018	5.53656	6.29949	5.85737	4.77907	4.47858	2.76482	2.82555	2.54769	2.35166	1.76615	2.56808	2.25491	2.64675	2.71631	2.59373	2.48049			Breast_SE_72_2	1	24654959	24674959
Breast_SE_4486_2	16	28817175	28837175	5.71875	6.08949	6.22365	5.78006	5.04084	2.80984	2.87214	2.8491	2.76195	2.0821	2.72276	2.5891	2.78993	2.81108	2.73644	2.63363			Breast_SE_72_3	1	24674959	24694959
Breast_SE_2260_12	7	5495590	5515590	4.56193	5.14312	6.68643	4.926	4.46821	2.55079	2.59217	2.52703	1.91767	2.56135	2.52345	2.60292	2.85004	2.72962	2.55355	2.52144			Breast_SE_72_4	1	24694959	24714959
Breast_SE_3921_2	12	123444987	123464987	5.28855	4.25313	5.17992	3.68682	4.26011	2.52278	2.52152	2.49699	1.6006	2.26354	2.50145	2.56637	2.71253	2.07249	2.23138	2.28375			Breast_SE_72_5	1	24714959	24734959
Breast_SE_5130_2	19	55320660	55340660	4.62799	5.20185	5.66926	5.45661	4.74023	2.46761	2.46208	2.39102	2.48531	2.15402	2.45713	2.5328	2.45945	2.55441	2.55251	2.40384			Breast_SE_72_6	1	24734959	24754959
Breast_SE_5098_2	19	45683012	45703012	4.89457	5.00398	4.74862	4.91722	5.3653	2.63761	2.63157	2.49034	0	1.29171	2.52148	2.04814	2.64291	1.65713	2.25927	2.18587			Breast_SE_72_7	1	24754959	24774959
Breast_SE_3893_1	12	112402149	112422149	5.15991	5.67356	5.77582	5.57753	4.81903	2.67194	2.65222	2.61897	2.6305	2.11577	2.56073	2.5078	2.76203	2.58176	2.4855	2.40449			Breast_SE_72_8	1	24774959	24794959
Breast_SE_4998_15	19	6049051	6069051	1.71266	5.4278	0	3.8113	4.04756	1.3277	1.35587	0	0	1.70712	0	0	0	0	0	0			Breast_SE_72_9	1	24794959	24814959
Breast_SE_3780_2	12	55910751	55930751	5.10073	5.13832	5.16672	4.95766	3.95245	2.56484	2.66401	2.60544	1.92158	2.47192	2.5155	2.31562	2.70427	2.4069	2.32596	2.55565			Breast_SE_72_10	1	24814959	24834959
Breast_SE_862_4	2	177246850	177266850	5.85778	5.86049	5.83288	6.66868	6.05113	2.82717	2.90192	2.95523	2.86281	2.4843	2.85123	2.84592	2.89779	2.89289	2.83279	2.63632			Breast_SE_73_1	1	24845007	24865007
Breast_SE_317_3	1	155191140	155211140	6.06111	5.10799	6.33536	5.50504	6.78296	3.0724	2.9058	2.91887	2.64006	2.64105	2.90593	2.83889	2.82494	2.99824	2.84196	2.81621			Breast_SE_73_2	1	24865007	24885007
Breast_SE_531_9	1	234959178	234979178	5.93331	6.20489	7.55054	6.46831	4.60868	2.97474	2.98927	3.14149	2.11019	3.28685	2.79942	2.97911	2.915	1.9077	2.91711	2.82754			Breast_SE_73_3	1	24885007	24905007
Breast_SE_2252_7	7	1515696	1535696	5.35972	5.9778	7.37485	5.67556	5.93851	2.0744	2.49527	2.74274	2.82056	2.43905	2.75829	2.63985	2.92491	2.78824	2.89351	2.64034			Breast_SE_73_4	1	24905007	24925007
Breast_SE_4577_2	16	81005118	81025118	5.45723	5.45685	5.59968	5.37258	3.90512	2.68053	2.72638	2.64873	1.01999	2.13238	2.69963	2.32984	2.57443	2.53712	2.57842	2.25265			Breast_SE_73_5	1	24925007	24945007
Breast_SE_1896_2	5	179693944	179713944	5.56303	5.15599	5.38649	5.55161	4.88529	2.82208	2.66428	2.76721	2.25444	2.02313	2.63945	2.68948	2.77544	2.7181	2.63715	2.4642			Breast_SE_73_6	1	24945007	24965007
Breast_SE_2719_1	8	89968566	89988566	5.3006	4.57468	4.4456	4.2101	4.55413	2.5652	2.46651	2.48356	1.04619	2.38114	2.42946	2.3983	2.53162	2.00715	1.82632	2.08888			Breast_SE_73_7	1	24965007	24985007
Breast_SE_5098_3	19	45703012	45723012	5.70526	3.63872	4.84507	4.74406	5.54497	2.62866	2.66927	2.36645	1.57767	2.21232	2.55432	2.01702	2.6995	2.11443	2.5368	2.1171			Breast_SE_73_8	1	24985007	25005007
Breast_SE_5272_32	20	50149659	50169659	5.78866	6.27044	4.54444	6.13235	5.92965	2.99514	2.61324	2.92444	2.49209	2.374	2.71617	2.72339	2.77535	2.54698	2.51533	2.24404			Breast_SE_73_9	1	25005007	25025007
Breast_SE_3500_25	11	62753572	62773572	5.2834	4.93962	5.35217	4.92057	4.36704	2.73726	2.70398	2.80939	1.78031	1.93628	2.69298	2.54776	2.68668	2.58836	2.54037	2.09612			Breast_SE_73_10	1	25025007	25045007
Breast_SE_552_3	1	244852322	244872322	6.31976	6.18691	6.16139	5.71476	5.19777	2.86984	2.86421	2.89686	2.79784	2.38368	2.75543	2.89167	2.87412	2.84373	2.7752	2.70312			Breast_SE_73_11	1	25045007	25065007
Breast_SE_1988_12	6	31826089	31846089	6.25541	5.15608	5.74658	5.49883	4.97958	2.88898	2.794	2.80232	2.5616	2.68257	2.81274	2.79433	2.92804	2.62343	2.82521	2.69095			Breast_SE_73_12	1	25065007	25085007
Breast_SE_5082_8	19	40461294	40481294	4.1535	5.9438	4.7762	5.50369	4.14074	1.69326	2.24807	2.38999	1.56798	2.78793	2.24947	1.91201	2.48638	1.87953	2.4064	2.64345			Breast_SE_73_13	1	25085007	25105007
Breast_SE_603_1	2	20341184	20361184	5.00086	5.47926	5.79097	4.83668	3.86219	2.53955	2.60301	2.46111	2.01106	2.47627	2.46232	2.48764	2.52957	2.52434	2.47308	2.39974			Breast_SE_73_14	1	25105007	25125007
Breast_SE_3444_1	11	33032243	33052243	4.84701	5.09961	4.80709	4.96797	5.51762	2.63287	2.61207	2.51662	0.792823	2.8046	2.65541	2.43482	2.58407	2.33465	2.57661	2.1769			Breast_SE_74_1	1	25133714	25153714
Breast_SE_4997_4	19	5711872	5731872	3.9798	5.23531	4.67112	5.04778	4.14267	2.7181	2.79563	2.70328	1.5127	2.13888	2.71881	2.52268	2.72862	2.34532	2.22502	2.34403			Breast_SE_74_2	1	25153714	25173714
Breast_SE_5420_5	22	29262917	29282917	5.67987	5.91402	6.16479	5.59124	5.09957	2.89593	2.93108	2.95649	2.47911	1.67515	2.88975	2.71893	2.73953	2.84598	2.75855	2.75518			Breast_SE_74_3	1	25173714	25193714
Breast_SE_4401_8	15	90257503	90277503	4.97335	4.41339	4.86155	4.93789	5.20028	2.54632	2.51545	2.74893	1.20868	1.41472	2.4724	2.26951	2.64528	2.43484	2.14786	2.30403			Breast_SE_74_4	1	25193714	25213714
Breast_SE_5247_6	20	44203744	44223744	6.13982	5.77524	4.14525	5.42336	5.88372	2.82415	2.42658	2.6079	2.27815	2.46379	2.46722	2.3663	2.75914	2.47487	2.61892	2.43109			Breast_SE_75_1	1	25229104	25249104
Breast_SE_1984_14	6	30732578	30752578	6.07567	5.71143	7.50903	5.58275	4.98661	2.98355	2.98331	2.94916	2.57239	2.96312	3.02506	2.99423	3.11347	2.64235	3.00156	2.53908			Breast_SE_75_2	1	25249104	25269104
Breast_SE_4682_2	17	28700399	28720399	6.57673	6.31044	5.17608	5.20867	5.38611	2.95922	3.06027	2.75896	2.51885	2.10648	2.8504	2.76958	2.89845	2.7438	2.49354	2.36733			Breast_SE_76_1	1	25468341	25488341
Breast_SE_5309_5	20	63847654	63867654	5.91875	7.31829	6.02983	6.1765	5.04198	2.80864	2.76775	2.88774	2.83177	2.73508	2.71939	2.74554	2.93054	2.84294	2.91046	2.72199			Breast_SE_76_2	1	25488341	25508341
Breast_SE_1925_3	6	7124825	7144825	5.63264	4.85609	5.11227	4.11729	3.67998	2.04922	2.54322	2.03951	1.40717	2.40234	2.36387	2.23097	2.28431	1.98648	2.73938	2.47513			Breast_SE_76_3	1	25508341	25528341
Breast_SE_5111_4	19	49111809	49131809	3.8204	6.4074	5.78665	5.46253	4.20219	2.85875	2.77494	2.42556	2.61248	2.10258	2.6902	2.33807	2.39296	2.49349	2.59626	2.5521			Breast_SE_76_4	1	25528341	25548341
Breast_SE_2298_4	7	26200363	26220363	5.03084	5.68858	6.04117	5.43998	4.93214	2.83248	2.78217	2.81697	2.69671	2.46248	2.7485	2.77436	2.72274	2.6768	2.69529	2.7467			Breast_SE_76_5	1	25548341	25568341
Breast_SE_858_3	2	173946369	173966369	5.81708	5.98643	5.80438	5.74898	5.39387	2.78897	2.8399	2.90696	2.76197	2.67156	2.7814	2.80667	2.8119	2.8932	2.77485	2.78903			Breast_SE_76_6	1	25568341	25588341
Breast_SE_5097_29	19	45573827	45593827	5.01351	5.4658	5.09238	5.26632	5.25957	2.59502	2.52929	2.63783	0	2.27491	2.62041	2.17131	2.68587	1.95736	2.28611	1.93587			Breast_SE_76_7	1	25588341	25608341
Breast_SE_3110_11	9	136477069	136497069	5.3201	6.83212	6.42841	5.33483	4.90518	2.7573	2.78027	2.71382	2.80009	2.01318	2.64686	2.37067	2.73103	2.87892	2.76621	2.62722			Breast_SE_76_8	1	25608341	25628341
Breast_SE_1285_5	3	159804723	159824723	2.04127	1.74301	0	0	2.95032	0	0	0	0	0	0	0	0	0	0	0.772343			Breast_SE_77_1	1	25722648	25742648
Breast_SE_4695_8	17	31558159	31578159	6.59376	5.81695	6.47121	4.88868	4.64649	3.10042	2.68852	2.95358	1.58709	2.91726	2.93051	2.7725	2.82404	2.79613	2.80522	2.84184			Breast_SE_77_2	1	25742648	25762648
Breast_SE_590_3	2	12715971	12735971	4.38861	0	0	0	0	2.68201	2.25744	2.8789	1.88928	2.26457	2.89714	2.88033	2.65509	2.08629	2.78751	1.78266			Breast_SE_77_3	1	25762648	25782648
Breast_SE_2255_3	7	2244271	2264271	4.99878	0	1.4187	0	0.223594	1.92091	2.19524	2.47725	1.89427	1.70748	2.62373	2.28356	2.60732	2.4371	2.83714	1.91279			Breast_SE_77_4	1	25782648	25802648
Breast_SE_1814_7	5	139480955	139500955	4.46296	0	2.42493	0	1.49393	2.10383	2.47194	2.46932	1.75381	2.82163	2.26489	2.51418	2.66497	1.60639	2.53395	1.57808			Breast_SE_77_5	1	25802648	25822648
Breast_SE_5423_13	22	30392936	30412936	2.00788	0	0	0.472206	0.392281	2.57364	2.01577	2.61049	1.83469	2.15021	2.62156	2.12687	2.1661	2.46046	2.66659	1.80301			Breast_SE_77_6	1	25822648	25842648
Breast_SE_3668_2	12	6079619	6099619	2.32215	0	1.61845	0	1.23446	1.55296	1.79299	2.4996	1.29882	2.29059	1.28655	1.8893	2.33743	2.06776	2.55653	1.03697			Breast_SE_78_1	1	25848603	25868603
Breast_SE_2755_7	8	101441948	101461948	6.24258	0	1.49061	1.18951	1.24878	2.96255	2.43604	2.98855	2.12967	3.23222	2.78865	2.45974	2.58254	1.84738	2.67647	2.53808			Breast_SE_78_2	1	25868603	25888603
Breast_SE_490_2	1	224497421	224517421	4.85144	0	2.0906	0	1.66864	2.37149	1.35155	2.60084	1.73001	2.67046	2.23766	2.55677	2.75534	2.03061	2.70357	2.34235			Breast_SE_78_3	1	25888603	25908603
Breast_SE_2255_10	7	2384271	2404271	3.94299	0.310961	2.38349	1.78896	1.84215	2.2253	2.29293	2.37818	2.25883	2.28078	2.20929	2.50907	2.00092	2.19474	2.43457	2.12844			Breast_SE_78_4	1	25908603	25928603
Breast_SE_4056_4	13	113835721	113855721	5.66991	0	0	0	1.57867	2.70633	2.36143	2.60109	2.86698	2.4414	2.06604	2.8554	2.53149	2.33807	1.9852	1.59035			Breast_SE_79_1	1	25987852	26007852
Breast_SE_5036_6	19	18927777	18947777	2.73481	0	0	0.38206	0.689134	2.65122	2.11556	2.71374	2.26027	1.27443	2.41462	2.63463	2.44539	2.67085	2.87006	1.8208			Breast_SE_79_2	1	26007852	26027852
Breast_SE_5438_15	22	37324052	37344052	0	0	0	0	1.2716	2.79488	1.85778	2.94137	2.36992	2.39698	2.34434	2.15962	2.49732	1.28757	2.87579	1.33755			Breast_SE_79_3	1	26027852	26047852
Breast_SE_2392_2	7	76428220	76448220	1.70461	0	0	0	1.93334	1.83521	1.04516	2.29286	1.30378	1.99722	1.07048	1.91567	2.03602	1.74514	2.00051	0.983591			Breast_SE_79_4	1	26047852	26067852
Breast_SE_5438_14	22	37304052	37324052	1.84261	0	0	0	0	1.77221	1.63972	3.06161	2.01642	1.73385	2.79366	2.39564	2.78104	2.47516	2.63731	0.616966			Breast_SE_79_5	1	26067852	26087852
Breast_SE_622_10	2	28438557	28458557	4.14146	0	0	0	1.72004	2.79907	2.31099	2.72768	2.16289	2.31912	2.75183	2.17656	2.14424	1.9486	2.58139	1.33269			Breast_SE_79_6	1	26087852	26107852
Breast_SE_3398_3	11	8706454	8726454	6.26695	0	1.96481	0	2.52407	2.03072	1.84911	2.70825	1.54998	2.9119	2.80075	2.44573	2.71371	2.42895	2.68937	1.40771			Breast_SE_79_7	1	26107852	26127852
Breast_SE_3505_11	11	65181557	65201557	5.14168	0	2.72645	2.56081	2.07749	2.29212	2.44858	2.48999	2.77309	2.7164	2.17684	2.20346	2.4635	2.65092	2.90006	2.27876			Breast_SE_79_8	1	26127852	26147852
Breast_SE_2385_7	7	74082773	74102773	6.38912	0	2.63229	3.30308	2.5213	2.53853	2.51949	3.08515	2.45959	2.30056	2.87769	2.85058	2.98675	2.99969	2.70326	2.04636			Breast_SE_80_1	1	26262078	26282078
Breast_SE_2438_5	7	101139593	101159593	4.30988	0	0.498822	3.07386	1.37763	2.64057	2.55429	2.61677	2.43028	2.19938	2.44344	2.36248	2.57999	2.76132	2.58581	1.7729			Breast_SE_80_2	1	26282078	26302078
Breast_SE_4157_13	14	68672182	68692182	4.55727	0	0	1.9881	2.09348	2.48959	2.00938	2.96969	2.017	2.75845	2.39641	2.49167	2.98143	2.18064	2.58371	0.78826			Breast_SE_80_3	1	26302078	26322078
Breast_SE_5278_19	20	51973465	51993465	4.16536	0	0	0	0	0	2.75211	2.47343	1.85641	2.49474	2.31569	2.55554	2.3312	2.42752	2.43269	1.72593			Breast_SE_80_4	1	26322078	26342078
Breast_SE_4353_6	15	73989801	74009801	5.599	0.692249	1.42485	2.89599	2.11009	2.76951	2.15787	2.81218	2.13347	1.985	2.62006	2.53919	2.72459	2.55095	2.45519	1.92336			Breast_SE_80_5	1	26342078	26362078
Breast_SE_1109_6	3	52028126	52048126	2.91424	0	0	0	0	2.66081	1.1193	2.62682	1.95751	2.03682	2.79301	2.49276	2.87111	2.44783	2.0606	0.796915			Breast_SE_80_6	1	26362078	26382078
Breast_SE_5405_2	22	24139714	24159714	6.12983	0	4.14979	1.48842	0	2.45532	2.54157	2.89048	2.27759	2.48589	2.70542	2.73307	2.65603	2.40185	2.83525	2.58525			Breast_SE_80_7	1	26382078	26402078
Breast_SE_1824_3	5	141500388	141520388	5.32189	0	0	0	0	2.80297	1.71755	3.1531	1.9327	2.52422	2.82855	3.09554	2.50128	1.35046	2.44733	0.663094			Breast_SE_80_8	1	26402078	26422078
Breast_SE_5466_2	22	43913705	43933705	3.80174	0	0	2.11864	2.9911	2.59884	2.16972	2.89058	2.25016	2.26178	2.51512	2.37492	2.5406	2.56706	2.58213	1.6307			Breast_SE_80_9	1	26422078	26442078
Breast_SE_3457_2	11	35133875	35153875	4.58887	0	0	0	3.67351	2.92524	1.7814	2.75958	2.38376	2.78003	2.71268	2.58387	2.76402	2.80773	2.90132	2.18477			Breast_SE_81_1	1	26461785	26481785
Breast_SE_4750_3	17	47838398	47858398	5.75046	0	2.96879	0	0.427338	1.24939	2.11303	2.43943	2.26555	1.74251	2.14733	2.49883	2.55246	1.82544	2.78942	2.54417			Breast_SE_81_2	1	26481785	26501785
Breast_SE_4859_9	17	77236384	77256384	5.53493	0	2.26615	0	1.37986	0.988777	2.31559	2.43763	2.24981	1.74045	2.18969	2.71735	2.76567	2.34215	2.50663	0.981865			Breast_SE_81_3	1	26501785	26521785
Breast_SE_3306_1	10	102094717	102114717	2.6624	0	2.02679	0.566685	1.40655	2.25028	2.33987	1.91043	2.19596	1.62071	1.74563	2.06234	1.84748	2.32643	2.14292	1.87058			Breast_SE_81_4	1	26521785	26541785
Breast_SE_938_6	2	219449095	219469095	6.37053	0	0	0	0.893333	2.8197	0.740561	2.96419	2.00262	2.34615	2.96915	2.82265	2.16151	2.6401	2.68498	1.02964			Breast_SE_81_5	1	26541785	26561785
Breast_SE_974_1	2	234233203	234253203	4.57035	0	0	0	1.51439	2.5785	2.48897	2.80567	2.11777	2.66956	2.63933	2.65778	2.7636	2.44642	2.60734	0			Breast_SE_81_6	1	26561785	26581785
Breast_SE_3820_6	12	75714118	75734118	3.02436	0	2.23975	0	0	2.39149	1.09907	2.06647	0.848146	2.70126	1.96282	2.02704	2.62767	1.85847	1.8609	1.63893			Breast_SE_82_1	1	26613183	26633183
Breast_SE_5400_3	22	23166257	23186257	3.44359	0	2.06482	2.58924	0	1.49336	2.42994	2.39846	2.49324	2.36655	1.82733	2.05838	1.96516	2.52364	2.55414	2.07682			Breast_SE_82_2	1	26633183	26653183
Breast_SE_3383_3	11	298688	318688	2.77064	0	0	0	3.41152	2.45343	2.68406	2.77952	2.37564	2.20906	1.52476	2.57457	2.54196	2.063	2.67162	1.022			Breast_SE_83_1	1	26670668	26690668
Breast_SE_2361_5	7	55007595	55027595	4.98405	0	0	3.69716	0.517264	2.80253	2.52209	2.62669	2.7145	2.03634	2.69825	2.51301	2.81689	2.74346	3.1767	1.44872			Breast_SE_83_2	1	26690668	26710668
Breast_SE_2564_3	8	22079254	22099254	3.50248	2.0902	1.78669	2.15235	2.4027	2.45966	2.28217	2.34613	2.19158	2.18695	2.43076	2.23449	2.1356	2.36527	2.55917	2.09838			Breast_SE_83_3	1	26710668	26730668
Breast_SE_802_4	2	127629337	127649337	4.24684	0	0	0	0.866472	2.37943	2.40638	2.27629	2.50366	1.54317	2.80511	2.78942	2.83059	2.4386	2.63717	0.189974			Breast_SE_83_4	1	26730668	26750668
Breast_SE_4845_5	17	73328615	73348615	4.36235	0	0.560565	0	1.71847	0	2.74837	2.65153	1.48937	2.45443	1.35057	2.51956	2.49187	2.1837	2.61806	2.39716			Breast_SE_83_5	1	26750668	26770668
Breast_SE_3918_8	12	122937615	122957615	5.53526	0	4.66058	0.528955	1.60747	2.76666	1.86204	2.80942	2.19976	2.54986	1.95867	2.50881	2.91934	1.97994	2.66606	2.23623			Breast_SE_83_6	1	26770668	26790668
Breast_SE_163_10	1	54390399	54410399	4.30414	0	3.43795	2.50234	2.98532	2.0965	2.69759	2.38404	2.39853	2.41301	2.3619	2.59252	2.38435	2.65202	2.6305	2.02633			Breast_SE_83_7	1	26790668	26810668
Breast_SE_310_4	1	153514265	153534265	3.65567	0	0	2.31355	2.52176	2.32278	2.32414	2.31644	2.27586	2.91049	1.99083	1.7869	2.50697	1.45996	2.65826	1.59481			Breast_SE_83_8	1	26810668	26830668
Breast_SE_4761_9	17	50409937	50429937	5.35518	0	3.30335	3.18328	0.86241	1.85759	2.09083	2.52028	2.4358	2.74111	2.43755	2.49332	2.48212	1.95665	2.59366	2.29361			Breast_SE_83_9	1	26830668	26850668
Breast_SE_5423_5	22	30232936	30252936	5.95082	0	0	0.539975	4.54218	2.93328	2.72298	3.08477	2.66172	2.45758	2.96329	2.78951	2.97768	3.01961	3.04487	1.80384			Breast_SE_83_10	1	26850668	26870668
Breast_SE_425_7	1	203618414	203638414	4.52466	0	0	0	1.66042	2.83808	2.43226	2.63955	0.303448	2.30351	2.40308	2.6376	2.70488	2.1989	2.37724	2.43794			Breast_SE_83_11	1	26870668	26890668
Breast_SE_3218_1	10	47382576	47402576	2.31683	0	0	0	1.44378	0	1.35948	2.30954	1.59627	2.53701	2.39935	2.53913	2.2122	2.30283	2.21389	2.15863			Breast_SE_83_12	1	26890668	26910668
Breast_SE_2549_4	8	11840472	11860472	5.28502	0.301502	1.39245	1.43261	3.11937	2.89303	1.78045	2.09569	1.9051	2.3788	2.51826	1.98477	2.50558	2.53616	2.70213	2.07969			Breast_SE_83_13	1	26910668	26930668
Breast_SE_649_14	2	43084894	43104894	4.90143	0	0	0	1.88953	2.58952	2.354	2.42596	1.99578	2.52571	2.55282	2.62277	2.51867	2.39749	2.71274	0			Breast_SE_84_1	1	26941486	26961486
Breast_SE_649_13	2	43064894	43084894	5.71271	0	0	0	2.28475	2.80416	2.34045	2.82837	2.49018	2.94633	2.8694	2.98224	2.63147	2.48678	2.97021	0			Breast_SE_84_2	1	26961486	26981486
Breast_SE_5272_56	20	50629659	50649659	4.60716	0	2.56673	0	0.692141	2.6203	2.80858	2.86714	0.387811	2.00068	2.29037	2.76528	2.74391	2.33118	2.72552	1.68038			Breast_SE_84_3	1	26981486	27001486
Breast_SE_2392_3	7	76448220	76468220	2.6912	0.786357	0.987611	1.35096	2.3717	2.14464	1.40234	1.87474	1.93848	1.84948	1.80448	2.03143	2.33631	2.36882	2.17293	1.19489			Breast_SE_84_4	1	27001486	27021486
Breast_SE_5408_3	22	24969737	24989737	5.54534	0	0	0	2.64011	2.10797	0.858064	2.80897	1.71649	2.21414	1.9484	2.34724	2.5209	2.43246	2.47548	0.660959			Breast_SE_84_5	1	27021486	27041486
Breast_SE_4750_11	17	47998398	48018398	4.49008	0	0	0.111623	0.252236	2.41295	2.09706	2.59281	0	2.46956	1.60938	2.42471	2.01401	1.23791	2.15647	1.32004			Breast_SE_84_6	1	27041486	27061486
Breast_SE_1722_2	5	74631233	74651233	5.1305	0	4.36311	3.00796	2.96768	2.82649	2.59533	2.73077	1.98997	2.85489	2.85696	2.83803	2.99122	2.37534	2.6075	2.41769			Breast_SE_84_7	1	27061486	27081486
Breast_SE_4065_2	14	23046316	23066316	4.45026	0	1.57081	3.50186	2.44144	2.36086	2.60121	2.39574	2.2606	2.1312	2.17237	2.29078	2.39831	2.76151	2.5195	2.13433			Breast_SE_85_1	1	27080585	27100585
Breast_SE_2840_6	8	141070050	141090050	4.04196	0	4.6977	0	0.32694	2.64232	2.68194	2.7227	2.65909	2.44773	2.67232	2.38742	2.76548	2.27565	2.37103	2.18828			Breast_SE_85_2	1	27100585	27120585
Breast_SE_3544_2	11	78031278	78051278	4.37449	0	0	0	1.31071	2.32299	2.02418	2.10882	0	2.73163	2.59097	2.53781	2.73479	2.09394	2.66819	2.05756			Breast_SE_85_3	1	27120585	27140585
Breast_SE_1102_2	3	49795971	49815971	2.57659	0	1.17215	0	0	1.44361	1.88213	2.84286	1.61016	2.00118	2.53025	2.45542	2.03087	1.53319	2.31501	0			Breast_SE_85_4	1	27140585	27160585
Breast_SE_4157_26	14	68932182	68952182	5.73232	0	1.43759	2.58539	4.37784	2.61132	2.56857	2.87976	2.01904	2.87743	2.72001	2.73284	2.87991	2.20363	2.72849	1.78712			Breast_SE_85_5	1	27160585	27180585
Breast_SE_1068_2	3	37861870	37881870	2.2906	0	1.32405	0	0.844862	1.36063	2.45514	2.26653	2.17711	1.36787	0	2.10832	2.0843	2.0866	2.34639	1.16166			Breast_SE_86_1	1	27293977	27313977
Breast_SE_134_12	1	44030593	44050593	3.71606	0	2.9644	1.58762	3.29159	2.84181	2.48737	2.73217	2.33967	1.72613	2.8444	2.50756	2.66943	2.58081	2.67911	2.24499			Breast_SE_86_2	1	27313977	27333977
Breast_SE_3917_1	12	122675455	122695455	4.29875	0	0	0.761949	1.52417	2.33271	0	2.16398	1.7088	2.12361	1.88843	2.40835	2.53073	1.54902	2.30666	1.96343			Breast_SE_86_3	1	27333977	27353977
Breast_SE_4741_3	17	44811945	44831945	5.55292	0	0	0	3.82	2.67791	2.60138	2.58214	2.53358	2.05383	2.58104	2.44116	2.22589	2.57219	2.45046	1.94629			Breast_SE_86_4	1	27353977	27373977
Breast_SE_5306_3	20	62611721	62631721	5.7703	0	2.79476	0	4.19839	2.89956	2.52197	2.66248	2.81949	2.55312	2.18285	2.71099	3.15672	2.97717	2.79627	1.45427			Breast_SE_86_5	1	27373977	27393977
Breast_SE_3074_24	9	128144108	128164108	5.04642	1.23853	2.49013	2.33888	3.15278	2.09358	2.45742	2.46664	2.67778	2.68688	2.02191	1.89734	2.60234	2.92782	3.03447	1.96763			Breast_SE_86_6	1	27393977	27413977
Breast_SE_636_6	2	37656702	37676702	4.82932	0.112281	0	0	2.0532	2.4925	2.44146	2.59935	2.67617	2.01964	2.74661	2.64686	2.82646	2.42263	2.56682	0			Breast_SE_86_7	1	27413977	27433977
Breast_SE_2847_2	8	143024957	143044957	3.01188	0	0	0	0	1.38766	0	3.02712	1.80992	2.65419	2.35888	2.86815	2.34503	2.20516	2.9151	0			Breast_SE_86_8	1	27433977	27453977
Breast_SE_5141_3	20	1380883	1400883	5.01218	0	2.32462	2.81439	2.20975	2.74964	2.11453	2.34522	2.10235	2.21919	1.93985	2.05725	2.67125	2.5279	2.51335	1.07631			Breast_SE_86_9	1	27453977	27473977
Breast_SE_4871_1	17	82485312	82505312	3.07008	1.05541	2.9871	3.18107	2.85702	2.04209	2.36981	2.39082	2.00179	2.0974	2.21941	2.63944	2.45096	2.04503	2.22181	2.31999			Breast_SE_86_10	1	27473977	27493977
Breast_SE_83_8	1	26810668	26830668	2.71918	0	1.01277	2.93631	1.83809	2.05456	2.11751	1.91764	2.02984	2.41509	1.9303	1.65552	1.94083	2.31528	2.39942	2.1661			Breast_SE_86_11	1	27493977	27513977
Breast_SE_3264_9	10	79189217	79209217	4.0829	0	0	0	0.447585	1.2214	2.05926	2.52641	0	1.5947	2.31529	2.20793	1.97142	1.50119	1.95551	1.34371			Breast_SE_86_12	1	27513977	27533977
Breast_SE_4662_5	17	18215950	18235950	5.03552	0	0	0	0	2.03719	2.23073	2.77666	2.21393	0	2.44798	2.41851	2.7475	2.52636	2.33829	1.32988			Breast_SE_86_13	1	27533977	27553977
Breast_SE_4862_12	17	78312130	78332130	5.42881	0	0	1.15501	3.98669	2.76299	2.89732	2.87868	2.50373	1.68829	2.77387	2.80064	3.06124	2.53325	2.53143	1.55322			Breast_SE_86_14	1	27553977	27573977
Breast_SE_107_6	1	32771008	32791008	4.79566	0.279001	2.22911	0	2.3941	2.40375	1.36005	2.52878	1.75975	1.48048	2.306	1.96775	2.34795	2.57803	2.48482	1.62954			Breast_SE_86_15	1	27573977	27593977
Breast_SE_1221_9	3	126896629	126916629	3.93063	0	0	0	0.205652	0	1.21006	2.72757	1.83561	2.61992	2.50405	2.22397	2.89667	1.76449	2.40159	0			Breast_SE_86_16	1	27593977	27613977
Breast_SE_2040_15	6	44025589	44045589	6.02995	0	4.05462	0	3.82689	2.84722	2.13942	3.15789	1.96991	3.1166	2.84084	2.46226	2.94544	2.72115	2.9305	1.99179			Breast_SE_86_17	1	27613977	27633977
Breast_SE_4995_3	19	5282552	5302552	3.93521	0	3.31924	0	2.76375	2.34268	2.49051	2.15323	2.38135	1.93595	2.18368	2.54068	2.09696	2.51129	2.38124	2.29145			Breast_SE_86_18	1	27633977	27653977
Breast_SE_1017_5	3	11497026	11517026	3.51978	0	0	0	0.326305	2.17331	2.76978	2.35065	0	2.23747	2.70043	2.61123	2.52126	2.20523	2.00431	0.983226			Breast_SE_86_19	1	27653977	27673977
Breast_SE_3398_8	11	8806454	8826454	3.64422	0	0	0	3.01998	2.06979	1.78389	2.48269	1.74829	2.80049	2.34173	2.27411	2.31212	1.9243	2.32193	0.368138			Breast_SE_86_20	1	27673977	27693977
Breast_SE_4200_4	14	92502814	92522814	2.9654	0	0	0	3.4702	2.74664	2.04159	2.55948	2.60879	2.58598	2.75071	2.57836	2.78202	2.75232	2.673	0.439324			Breast_SE_87_1	1	27842740	27862740
Breast_SE_2847_1	8	143004957	143024957	5.32479	3.17353	3.34339	1.3902	2.39631	2.54115	2.1309	3.20129	2.75332	2.85357	2.27764	2.78407	2.51826	2.93946	2.9772	2.24852			Breast_SE_87_2	1	27862740	27882740
Breast_SE_3249_3	10	71982348	72002348	4.24951	0	0	0	0	2.43231	2.16164	2.12192	0	1.36462	2.13061	2.51908	1.78372	2.19297	2.57421	1.83253			Breast_SE_87_3	1	27882740	27902740
Breast_SE_5272_38	20	50269659	50289659	5.13754	0	2.78403	2.10123	3.70838	2.48251	2.01462	3.06626	2.31174	2.20177	2.67774	2.68875	2.55095	2.91913	2.97416	1.36308			Breast_SE_87_4	1	27902740	27922740
Breast_SE_4532_2	16	57989171	58009171	5.45682	1.02688	3.58289	3.71516	2.60457	2.30349	2.49413	2.56507	2.65048	2.6479	2.28795	2.23332	2.69944	2.70976	2.9398	2.11305			Breast_SE_88_1	1	27955260	27975260
Breast_SE_3346_3	10	119669519	119689519	4.04053	0	0	0	1.60221	2.64681	0	2.53162	1.75178	2.82736	1.95548	1.54999	2.88157	2.48747	2.49866	1.02213			Breast_SE_89_1	1	28074331	28094331
Breast_SE_1746_2	5	93574066	93594066	2.28311	0	0	0	0	2.44395	2.5707	2.78934	2.52225	1.2114	2.91996	2.61427	2.70642	1.82053	0.821879	2.19499			Breast_SE_89_2	1	28094331	28114331
Breast_SE_4406_1	15	91850997	91870997	4.90222	0	0	0	2.23895	2.39287	2.08949	2.71824	2.45121	2.38062	2.41414	2.19568	2.35756	2.5512	2.12949	0			Breast_SE_89_3	1	28114331	28134331
Breast_SE_5376_11	21	45462660	45482660	5.26278	0	0	3.73601	0.870519	2.2385	2.29557	2.34908	2.15051	2.3437	2.61355	2.80521	2.29172	2.44546	2.75879	0.719114			Breast_SE_89_4	1	28134331	28154331
Breast_SE_4268_3	15	40264534	40284534	3.22623	0	0	0	0	1.29969	2.34579	2.1235	1.87678	0	1.50833	2.09304	2.01061	2.25407	1.97384	1.53134			Breast_SE_89_5	1	28154331	28174331
Breast_SE_4225_16	14	103139607	103159607	5.10566	0	0.489507	0	0	0	1.9789	1.62231	2.19473	2.48303	0	2.06219	1.53939	2.60824	2.57679	1.80749			Breast_SE_89_6	1	28174331	28194331
Breast_SE_2606_1	8	37768984	37788984	3.97536	0	0	0	1.46679	0	2.455	2.17351	1.38582	2.05384	2.64545	2.83092	1.53262	2.11741	2.63072	1.4188			Breast_SE_89_7	1	28194331	28214331
Breast_SE_700_6	2	64863607	64883607	2.11465	0	3.67561	0.960398	1.49622	2.26486	1.76474	2.15797	1.86644	1.96298	1.09859	2.51304	2.27227	1.97339	1.73221	2.00437			Breast_SE_90_1	1	28226621	28246621
Breast_SE_1069_8	3	38023160	38043160	3.9158	2.91343	2.80788	1.81585	2.27993	2.38594	1.91326	2.51632	1.84544	2.31297	1.93131	2.08318	2.4362	2.12962	2.50964	2.04769			Breast_SE_90_2	1	28246621	28266621
Breast_SE_4538_1	16	66599890	66619890	4.70473	1.36887	3.40048	2.1731	3.632	2.6124	2.69939	2.59226	2.68967	2.46392	2.62967	2.6373	2.41771	2.77249	2.43903	2.35021			Breast_SE_90_3	1	28266621	28286621
Breast_SE_3218_2	10	47402576	47422576	5.34439	0	0	1.92138	3.59834	0.947715	1.84899	2.71454	1.93632	2.08835	2.70877	2.76579	2.74222	2.64681	2.59657	1.76867			Breast_SE_91_1	1	28276571	28296571
Breast_SE_3402_9	11	9753904	9773904	5.28626	0.0435402	3.13313	3.29906	3.45859	2.73895	2.95132	2.81223	2.47769	2.29422	2.80391	2.73002	2.91306	2.50751	2.36102	1.873			Breast_SE_91_2	1	28296571	28316571
Breast_SE_5439_22	22	37884943	37904943	5.38827	0	0.859823	0	4.25659	2.77428	2.83932	2.58166	2.43027	2.98691	2.50537	2.18813	2.2933	1.77851	2.90686	1.8672			Breast_SE_91_3	1	28316571	28336571
Breast_SE_4353_5	15	73969801	73989801	5.18472	0	0	0	0	2.72535	0	2.92633	1.31795	2.55666	2.67646	2.67935	2.87078	2.52249	2.51009	0			Breast_SE_91_4	1	28336571	28356571
Breast_SE_1565_3	4	156958911	156978911	3.24718	0.993485	1.02429	0	3.29269	2.37436	2.74218	2.16411	2.27571	1.97213	2.2091	2.52867	2.63938	2.09621	2.35125	1.03523			Breast_SE_91_5	1	28356571	28376571
Breast_SE_3253_11	10	73904390	73924390	5.98664	0	1.52235	0	4.43492	3.02979	1.32847	2.50103	2.59234	2.85866	2.76367	2.6097	3.02162	2.82097	2.83514	1.80519			Breast_SE_91_6	1	28376571	28396571
Breast_SE_3502_4	11	63802048	63822048	5.60678	2.31958	3.113	1.73116	3.64119	2.53093	2.66283	2.59901	2.26421	2.54393	2.41365	2.29898	2.38812	2.69948	2.72713	1.99466			Breast_SE_91_7	1	28396571	28416571
Breast_SE_3084_7	9	130932577	130952577	2.037	0	0	0	1.84323	2.69951	0	2.74227	2.16408	1.58865	2.06676	2.61957	2.30329	2.32884	2.1923	2.21142			Breast_SE_92_1	1	28471348	28491348
Breast_SE_580_2	2	9739757	9759757	1.80596	0	0	0	0.234443	2.25542	0	2.5505	1.86838	1.98334	2.53242	1.82564	2.64264	2.42098	2.45998	0.186602			Breast_SE_92_2	1	28491348	28511348
Breast_SE_2386_6	7	74303438	74323438	4.78632	0	0.819398	0	0	0	0.743929	2.17256	1.80273	2.48315	0	1.89714	2.28827	2.38148	2.50019	0.479353			Breast_SE_92_3	1	28511348	28531348
Breast_SE_3505_29	11	65541557	65561557	6.87139	2.27747	4.41158	3.46162	3.07566	3.02286	2.88052	2.96145	2.92691	2.53028	2.84239	2.81422	2.79214	3.0853	3.06221	2.21841			Breast_SE_92_4	1	28531348	28551348
Breast_SE_3253_9	10	73864390	73884390	4.52301	2.21137	1.99945	1.79575	0.331872	1.90263	2.26947	1.96192	2.44156	2.61959	1.67878	1.97964	2.08162	2.35757	2.75522	2.21525			Breast_SE_92_5	1	28551348	28571348
Breast_SE_3391_5	11	3145961	3165961	3.6742	0	1.16913	0	0.686766	2.054	2.39476	2.61113	1.98658	0	2.39153	2.97345	2.47619	2.68282	2.45828	2.13681			Breast_SE_92_6	1	28571348	28591348
Breast_SE_3820_3	12	75654118	75674118	0	0	0	0	0.277634	1.86805	1.4995	1.6801	1.24348	2.44943	1.89245	1.75114	2.78881	1.75285	0.875469	0			Breast_SE_92_7	1	28591348	28611348
Breast_SE_2043_1	6	45406506	45426506	5.35126	0	0	0	0	2.77077	0	2.8556	2.59131	1.93722	2.94814	2.88904	2.82399	2.75373	2.56069	0			Breast_SE_93_1	1	29106187	29126187
Breast_SE_4859_16	17	77376384	77396384	6.04863	0	0.563055	3.34186	2.66082	2.68468	2.43919	3.02518	0.634652	2.59899	2.7694	2.97872	2.90271	2.25292	3.06894	2.15501			Breast_SE_93_2	1	29126187	29146187
Breast_SE_2040_17	6	44065589	44085589	4.46135	0.882084	4.37525	0	3.36905	2.68691	2.46567	3.05584	2.27493	2.79952	2.74653	2.22303	2.85624	2.47863	2.68815	2.41189			Breast_SE_93_3	1	29146187	29166187
Breast_SE_4862_14	17	78352130	78372130	6.30488	0	1.34083	0	4.96607	2.94297	3.12189	2.72015	2.76838	1.9955	2.88519	3.17039	2.95262	2.84929	2.80048	2.06896			Breast_SE_94_1	1	29172107	29192107
Breast_SE_3387_3	11	1768583	1788583	4.30088	0	0	0	2.94378	2.24188	2.01658	2.7732	2.21568	1.8286	2.11093	2.3981	2.5644	2.64645	2.66951	0			Breast_SE_94_2	1	29192107	29212107
Breast_SE_566_8	2	1720934	1740934	4.85946	0	0	0	0	2.71593	0	2.71214	1.45175	2.10693	2.86568	2.64024	2.94941	2.55176	2.61118	0			Breast_SE_94_3	1	29212107	29232107
Breast_SE_1995_3	6	33575259	33595259	4.66318	1.25818	0	3.47409	2.54965	2.42419	2.5167	2.9088	2.54068	1.63559	2.633	2.53911	3.0326	2.68465	2.68753	1.85221			Breast_SE_94_4	1	29232107	29252107
Breast_SE_5438_10	22	37224052	37244052	3.55651	0	0	0	0	0	0	2.87533	1.6815	2.22085	2.55768	2.18893	2.89548	2.42131	2.46312	0.411141			Breast_SE_94_5	1	29252107	29272107
Breast_SE_1682_1	5	54504602	54524602	3.7088	0.970953	0.535624	2.93602	0	2.29594	2.39532	2.652	2.28447	1.69314	2.62763	2.25623	1.82572	2.27166	2.44104	1.42965			Breast_SE_94_6	1	29272107	29292107
Breast_SE_4528_5	16	57409506	57429506	0	0	1.31923	0.176133	0	0	2.5348	2.16213	2.33507	1.92462	0	2.43863	1.5494	2.24336	2.73197	1.52546			Breast_SE_95_1	1	29664657	29684657
Breast_SE_3131_10	10	5591208	5611208	3.13545	0	0	0	0	2.85311	0	2.33138	2.41338	2.59916	2.54996	2.7621	2.41967	1.64261	2.5308	0			Breast_SE_95_2	1	29684657	29704657
Breast_SE_1238_2	3	134292924	134312924	5.16552	0	3.676	0	2.82376	2.40121	2.66904	2.07561	1.96378	2.497	2.4828	2.51765	2.42068	1.98297	2.59863	1.12644			Breast_SE_95_3	1	29704657	29724657
Breast_SE_5216_2	20	34873580	34893580	0.583261	0	1.68339	0	0	1.96736	0.955388	2.51948	1.06915	1.58286	1.28193	1.42514	2.24966	2.04922	2.48657	0			Breast_SE_96_1	1	30691677	30711677
Breast_SE_37_7	1	16105388	16125388	5.11889	0.430288	0.860545	0	0	1.8386	1.42987	1.78389	1.66033	1.85762	0.99215	2.64955	1.62039	0	2.38769	0.951113			Breast_SE_96_2	1	30711677	30731677
Breast_SE_5439_29	22	38024943	38044943	3.15682	0	0	0	0	0	2.31327	2.04664	1.34933	1.45726	0	2.5499	2.232	1.89698	2.90587	0			Breast_SE_96_3	1	30731677	30751677
Breast_SE_2390_2	7	76053579	76073579	2.4358	0	0	0.418948	1.86054	0	1.76728	2.72215	1.35748	1.31864	2.24968	1.75598	2.3446	1.61998	2.26196	1.67736			Breast_SE_96_4	1	30751677	30771677
Breast_SE_5059_3	19	35000857	35020857	3.78954	0	2.00528	2.59281	3.34463	2.34624	2.39912	2.32089	2.05457	1.40287	2.44908	2.29048	2.73033	2.39011	2.66713	1.91456			Breast_SE_96_5	1	30771677	30791677
Breast_SE_3077_4	9	128897556	128917556	3.23047	0	4.16542	0	0	1.77241	2.27456	2.36634	2.31705	2.35264	2.30417	1.18111	3.15436	2.17761	2.55372	1.19826			Breast_SE_96_6	1	30791677	30811677
Breast_SE_2496_9	7	139770477	139790477	5.75144	0	4.92152	0	2.10876	2.63385	2.37258	2.80938	2.32156	1.97757	2.68421	2.37057	2.74344	2.81425	2.46601	1.92147			Breast_SE_96_7	1	30811677	30831677
Breast_SE_40_5	1	17125073	17145073	3.95217	0	0	0	2.35121	2.63163	2.24009	2.54823	1.92414	2.31399	2.33629	1.81422	2.46461	1.57855	2.54248	0			Breast_SE_97_1	1	30868597	30888597
Breast_SE_4334_8	15	67127593	67147593	5.16347	0	2.38203	2.88652	2.98267	2.1688	2.72481	2.8746	1.49784	2.48543	2.83135	2.60934	2.83035	2.39565	2.33986	1.05638			Breast_SE_97_2	1	30888597	30908597
Breast_SE_4386_11	15	84893296	84913296	4.78665	0	0	0	0.600289	2.70471	0	2.68727	1.66023	2.23577	2.41418	2.51975	0.950531	2.16333	2.70907	1.68068			Breast_SE_97_3	1	30908597	30928597
Breast_SE_649_18	2	43164894	43184894	4.76186	0	1.14811	3.39324	3.9366	2.54009	2.71552	2.59132	2.14467	2.64262	2.29346	2.67108	2.59576	1.91727	2.7337	1.56416			Breast_SE_97_4	1	30928597	30948597
Breast_SE_5439_23	22	37904943	37924943	4.57512	0	0	2.10951	3.92733	2.81693	2.70735	2.70344	2.64594	1.95405	2.73986	2.37495	2.39835	2.57954	2.75897	1.55163			Breast_SE_98_1	1	30959841	30979841
Breast_SE_5045_2	19	29654495	29674495	5.45042	0	5.56274	2.95894	2.18462	2.77629	2.38019	2.95466	2.94819	2.97627	2.66559	2.71996	2.7375	2.4267	2.98039	2.43497			Breast_SE_98_2	1	30979841	30999841
Breast_SE_3310_12	10	103641946	103661946	5.53824	0	0	0	0	2.85992	2.42901	2.06168	1.58086	0	2.68304	2.57297	2.53734	2.59315	2.54192	1.29677			Breast_SE_98_3	1	30999841	31019841
Breast_SE_34_1	1	15400095	15420095	4.48878	0	0	2.05648	3.94276	2.67357	2.48167	2.95973	2.65957	1.54199	2.67099	2.38381	2.86997	2.8023	2.4019	1.85951			Breast_SE_98_4	1	31019841	31039841
Breast_SE_4369_6	15	78068168	78088168	3.34738	0	0	0	0.813956	1.26272	1.95453	2.67911	1.7131	0	2.59021	2.45379	2.43927	1.75747	2.29819	2.16084			Breast_SE_98_5	1	31039841	31059841
Breast_SE_6_17	1	6492309	6512309	2.57	0	0	0	0	1.73188	2.17598	2.46225	2.54557	0	2.3358	2.65944	1.62047	2.66281	2.49447	1.14581			Breast_SE_98_6	1	31059841	31079841
Breast_SE_5358_2	21	41405975	41425975	3.47657	0	0.85259	0	0	2.08429	0	2.67307	1.89861	1.20019	0	2.40862	1.67858	2.15751	2.58023	1.25719			Breast_SE_99_1	1	31364821	31384821
Breast_SE_3059_9	9	121697147	121717147	2.88121	0	0	0	0	2.34013	2.23916	1.10624	2.48596	2.13176	2.005	1.7894	1.76841	2.19787	1.74379	0			Breast_SE_99_2	1	31384821	31404821
Breast_SE_4760_2	17	50032695	50052695	6.15368	0	0	0	1.88437	2.24313	0	2.80613	1.67669	2.89866	2.45086	2.63011	3.06998	2.47398	2.52384	0			Breast_SE_99_3	1	31404821	31424821
Breast_SE_5439_9	22	37624943	37644943	5.0471	0	1.86226	2.93405	0.600814	2.87473	2.67784	3.10162	2.75999	0.693833	2.78689	2.83932	2.45653	2.99757	2.84849	2.04475			Breast_SE_99_4	1	31424821	31444821
Breast_SE_4606_18	16	89574368	89594368	4.61931	0.731649	3.53597	2.93442	2.79143	2.67584	2.60126	2.64121	2.63324	2.17242	2.50351	2.05925	2.61805	2.70149	2.79809	1.64839			Breast_SE_100_1	1	31456638	31476638
Breast_SE_5439_4	22	37524943	37544943	3.26468	0	0.315892	0	2.19019	2.54956	1.50835	2.63637	0	2.53095	2.82012	2.45732	2.51087	2.13477	2.62006	1.56933			Breast_SE_100_2	1	31476638	31496638
Breast_SE_3804_13	12	65816126	65836126	4.68882	0	0	0	0	2.92007	3.0347	2.59932	2.82322	0.729974	2.84325	2.75928	2.94717	2.79729	1.91407	0			Breast_SE_101_1	1	31541877	31561877
Breast_SE_80_1	1	26262078	26282078	4.11951	2.45064	2.95672	3.51051	3.79513	2.73995	2.56119	2.90531	2.09635	2.54519	2.80375	2.34345	2.85173	2.52696	2.5946	2.05654			Breast_SE_101_2	1	31561877	31581877
Breast_SE_660_11	2	46975836	46995836	5.48244	0	0	1.66116	2.89503	1.89823	2.44431	2.58184	0.655393	1.61225	2.55616	2.34123	2.72267	2.44204	2.38601	1.38897			Breast_SE_101_3	1	31581877	31601877
Breast_SE_939_1	2	219625283	219645283	3.54133	0	0	0	0	2.18141	2.10955	2.30157	2.3418	0	2.44705	2.17228	1.64977	2.08875	2.58492	1.36949			Breast_SE_102_1	1	31605062	31625062
Breast_SE_5095_12	19	43771999	43791999	5.08888	0	2.38016	0	3.33651	2.4346	0.823741	2.63123	1.91093	2.9308	2.5639	1.70323	2.73078	2.62279	3.05211	2.39672			Breast_SE_102_2	1	31625062	31645062
Breast_SE_3249_2	10	71962348	71982348	6.00953	0	0	0	1.92688	3.09526	2.89207	2.88163	2.4674	0	2.75641	2.74713	2.86651	2.96453	2.72173	2.31378			Breast_SE_102_3	1	31645062	31665062
Breast_SE_4363_5	15	75669307	75689307	0	0	0	0	2.86762	1.61157	2.01002	2.38335	1.44156	2.3012	2.79174	2.03571	2.43253	0.527105	2.33179	1.68158			Breast_SE_102_4	1	31665062	31685062
Breast_SE_4530_4	16	57629741	57649741	5.02066	0	1.59825	0	0	0.477864	0	2.94671	2.22159	0.955383	1.85678	2.31013	2.45606	2.51448	2.66918	1.84007			Breast_SE_102_5	1	31685062	31705062
Breast_SE_40_9	1	17205073	17225073	4.65882	0	0	0	0	2.44588	2.17702	2.78847	2.18226	2.82629	1.41116	1.46372	2.53897	0	2.77031	0			Breast_SE_102_6	1	31705062	31725062
Breast_SE_580_5	2	9799757	9819757	4.3897	0	4.95453	0	2.14926	2.77395	1.34085	2.50007	2.33551	2.72571	2.58206	2.71369	2.27516	2.66289	2.8772	2.40683			Breast_SE_102_7	1	31725062	31745062
Breast_SE_322_11	1	156081803	156101803	3.95638	0.526212	4.18518	3.51498	2.83364	2.65486	2.62892	2.61307	2.42357	2.11156	2.36778	2.57714	2.48154	2.76507	2.98131	2.23693			Breast_SE_102_8	1	31745062	31765062
Breast_SE_1692_4	5	57827028	57847028	4.38805	0	0	0	2.24587	2.85964	2.56087	2.00726	0	2.77937	1.97567	2.29021	2.70386	1.4966	2.47695	1.72242			Breast_SE_102_9	1	31765062	31785062
Breast_SE_4761_5	17	50329937	50349937	3.22953	0	0	0.953779	0.435764	2.26719	2.27541	2.38764	2.30562	0	2.19604	2.25945	2.25786	2.37873	2.05285	2.18794			Breast_SE_102_10	1	31785062	31805062
Breast_SE_4452_8	16	11665532	11685532	3.05886	0	0	3.63385	1.75142	1.56348	2.47844	2.25063	1.95264	2.51222	1.65098	2.34555	1.49963	2.31867	2.24114	1.76082			Breast_SE_102_11	1	31805062	31825062
Breast_SE_2564_7	8	22159254	22179254	5.5421	0	0	1.95576	4.50315	2.38728	2.36611	2.87625	2.28736	1.94131	2.89218	2.82232	2.42198	2.83405	2.76294	1.60924			Breast_SE_103_1	1	31871891	31891891
Breast_SE_1786_4	5	132251927	132271927	5.6391	1.94009	0	0	0.799098	0	2.26609	3.00941	1.98198	1.72556	2.74009	2.53797	2.78437	2.62288	2.35498	1.35618			Breast_SE_103_2	1	31891891	31911891
Breast_SE_3391_2	11	3085961	3105961	1.9487	0	0	0	0	0	1.08051	2.12436	1.36203	0	1.76707	2.26001	2.75481	2.05852	2.23774	1.20633			Breast_SE_103_3	1	31911891	31931891
Breast_SE_2389_2	7	75876553	75896553	5.05914	2.71061	3.64106	2.76791	2.8891	2.34087	2.63111	2.517	1.81527	2.53457	2.23239	2.30383	2.22598	2.11575	2.32653	2.13098			Breast_SE_103_4	1	31931891	31951891
Breast_SE_3605_3	11	118603840	118623840	7.08661	0	2.77761	2.57697	4.67814	2.58062	3.04311	2.88218	2.69198	2.37367	3.00194	2.94367	2.87139	2.91606	2.50248	1.87544			Breast_SE_103_5	1	31951891	31971891
Breast_SE_5310_3	20	64040753	64060753	4.55988	0	0	0	3.89476	0	2.09286	2.68826	2.75272	2.40244	2.1405	3.13732	2.30755	2.51584	2.67274	2.36267			Breast_SE_103_6	1	31971891	31991891
Breast_SE_4056_3	13	113815721	113835721	5.32371	0	0	1.18751	0	2.75831	1.96513	2.71025	2.69529	0	2.57406	2.93755	2.65893	2.27818	2.34073	0.87995			Breast_SE_104_1	1	32008440	32028440
Breast_SE_5029_18	19	17389371	17409371	0	0	3.68013	0	0	0.478229	2.11403	2.73355	1.67315	2.40876	0	2.3927	2.31619	2.41234	2.48494	2.45974			Breast_SE_105_1	1	32166027	32186027
Breast_SE_3249_4	10	72002348	72022348	4.96874	0	0.0778525	0	2.11644	2.78431	2.29054	2.53583	2.26745	2.46248	2.48903	2.49818	0.240562	2.57785	2.84182	1.86282			Breast_SE_105_2	1	32186027	32206027
Breast_SE_4426_2	15	99422309	99442309	4.49391	0	0	0	0	2.39294	1.99098	2.69721	2.32669	1.70367	1.96892	1.79432	2.54961	0	2.65532	0			Breast_SE_105_3	1	32206027	32226027
Breast_SE_4730_8	17	42398058	42418058	5.18849	0	0	0	4.41765	2.69618	2.335	2.47845	1.58192	2.41134	1.87147	2.15034	2.56925	2.36068	2.68381	0.916459			Breast_SE_105_4	1	32226027	32246027
Breast_SE_40_8	1	17185073	17205073	4.63792	0	0	0	0.0426845	2.82824	2.42421	2.91273	2.1039	3.00074	2.64821	1.79944	2.81001	0	2.71999	0			Breast_SE_105_5	1	32246027	32266027
Breast_SE_2841_11	8	141373405	141393405	1.28306	0	0	0	0	2.32987	2.59298	2.83118	2.5462	0	0	2.53503	1.96311	2.43839	2.14167	1.57236			Breast_SE_105_6	1	32266027	32286027
Breast_SE_3250_5	10	72235407	72255407	4.09489	0	0	0	2.48207	2.66188	2.82015	2.79624	1.72733	1.95926	1.95584	2.63407	2.56598	0	2.34494	2.14116			Breast_SE_106_1	1	32302234	32322234
Breast_SE_578_2	2	9387820	9407820	3.59913	0	0	0	1.55636	1.34991	1.65345	2.09146	1.72979	1.74364	0	1.20054	2.1152	2.63109	2.75021	0.200817			Breast_SE_106_2	1	32322234	32342234
Breast_SE_1017_9	3	11577026	11597026	5.69283	0	2.49827	0	1.71038	2.24613	2.60068	2.61504	0	2.32504	2.17138	2.60491	2.38248	1.82362	2.25826	1.93486			Breast_SE_106_3	1	32342234	32362234
Breast_SE_4267_4	15	40057646	40077646	3.52604	0	0.297879	3.81132	1.40942	2.46733	2.61603	2.38926	1.98768	2.35723	2.56837	2.0451	1.93414	1.60806	2.339	2.22808			Breast_SE_106_4	1	32362234	32382234
Breast_SE_3383_4	11	318688	338688	1.99727	0	0	2.58514	2.96196	2.67464	2.51854	2.67096	1.72949	1.94989	2.27049	2.55212	2.58307	2.23407	2.3142	0.536104			Breast_SE_106_5	1	32382234	32402234
Breast_SE_3875_2	12	106241117	106261117	4.49993	3.32419	0.938533	1.57164	2.59084	2.54912	2.61177	2.75871	2.64011	2.12673	2.69159	2.61413	2.82922	2.633	2.35426	2.20938			Breast_SE_107_1	1	32671008	32691008
Breast_SE_5408_5	22	25009737	25029737	3.95992	0	0	0	0.774684	0.581576	0.420897	0.523282	1.61583	2.52893	0	1.64531	2.27671	1.80409	2.47749	1.09147			Breast_SE_107_2	1	32691008	32711008
Breast_SE_5462_11	22	42687322	42707322	3.88634	0	0	0	4.10007	2.86453	2.64042	2.79816	1.90803	2.38923	2.22593	2.48744	2.44923	2.3955	2.56081	0.377382			Breast_SE_107_3	1	32711008	32731008
Breast_SE_3069_6	9	126705301	126725301	4.43161	0	0	0	0	0	0	2.10079	2.55929	2.20928	0	2.05004	1.87214	2.67816	2.52386	2.46025			Breast_SE_107_4	1	32731008	32751008
Breast_SE_3073_2	9	127496984	127516984	3.95608	0	1.19019	0	0.975981	2.75329	2.22947	2.43983	1.4857	0	2.202	2.1463	2.81901	2.53798	2.28552	1.46804			Breast_SE_107_5	1	32751008	32771008
Breast_SE_3_9	1	2279037	2299037	4.02408	0	0	0	1.90549	1.47427	2.49978	2.64792	2.33367	0	2.52566	2.68035	2.69443	2.49468	2.13884	1.27617			Breast_SE_107_6	1	32771008	32791008
Breast_SE_4322_1	15	63001016	63021016	4.02864	0	0	0.119455	0	1.81534	1.73822	2.69477	0	2.61934	2.46423	2.24123	2.28142	1.21587	1.81189	0			Breast_SE_107_7	1	32791008	32811008
Breast_SE_4613_2	17	1564136	1584136	3.955	0	3.91078	0	2.83896	2.74834	2.06127	2.36519	1.91778	2.41486	1.85354	2.43855	2.38899	2.81664	2.7988	0.760332			Breast_SE_107_8	1	32811008	32831008
Breast_SE_3634_2	11	128897722	128917722	1.99519	0	0	0	0	0	0	2.1612	2.0696	2.04432	0	2.08198	2.04531	1.91986	2.23064	0			Breast_SE_108_1	1	32912245	32932245
Breast_SE_2934_2	9	37909606	37929606	5.3677	0	2.97468	0	0	2.82376	2.02905	2.61135	0	1.99297	2.13717	2.26569	2.37393	2.42187	2.84847	1.14326			Breast_SE_108_2	1	32932245	32952245
Breast_SE_3918_18	12	123137615	123157615	5.94113	0	0	2.64397	3.53373	2.19223	2.24411	2.46785	2.03122	1.69687	1.7905	2.44927	2.49704	2.84886	2.04127	1.35638			Breast_SE_108_3	1	32952245	32972245
Breast_SE_102_4	1	31665062	31685062	4.75545	0	2.78014	0	1.49512	2.68165	0.909452	2.43726	1.36446	2.1565	2.10043	2.26983	1.30683	2.63335	2.68873	1.16913			Breast_SE_108_4	1	32972245	32992245
Breast_SE_1858_3	5	159190621	159210621	4.92841	0	1.87454	3.51868	4.5249	2.75662	2.6188	2.86599	2.52198	2.67831	2.65086	2.70119	2.70609	2.70696	2.71106	1.56898			Breast_SE_108_5	1	32992245	33012245
Breast_SE_6_16	1	6472309	6492309	3.95569	1.26752	1.13205	2.44714	1.46777	2.43535	2.47288	2.79055	2.85635	0.88695	2.68185	2.31612	2.61139	2.74057	2.65554	1.88052			Breast_SE_108_6	1	33012245	33032245
Breast_SE_3110_3	9	136317069	136337069	4.35923	0	0	1.72111	0	2.54325	2.41861	2.53889	2.55925	0	2.32929	2.69075	2.14627	2.91197	2.50871	1.12018			Breast_SE_108_7	1	33032245	33052245
Breast_SE_3084_6	9	130912577	130932577	4.71906	0	1.92353	0	2.47976	2.93941	0	2.71146	1.37857	2.39239	2.30816	2.61731	2.41746	2.52349	2.55981	2.21391			Breast_SE_108_8	1	33052245	33072245
Breast_SE_5019_21	19	14091094	14111094	4.02163	2.61821	2.57057	1.66199	2.70508	2.39275	2.43868	2.39323	2.25446	2.27703	1.8978	2.3045	1.9588	1.76368	2.69909	2.07002			Breast_SE_108_9	1	33072245	33092245
Breast_SE_4226_4	14	103534167	103554167	5.29856	0	3.44278	1.96909	4.33847	2.48531	2.64359	2.66384	2.66067	2.22989	2.7387	2.75129	2.76662	2.69965	2.64667	1.49216			Breast_SE_108_10	1	33092245	33112245
Breast_SE_5376_8	21	45402660	45422660	4.75498	0	0	1.60357	0	1.79588	2.90921	1.95261	2.57624	0	2.35325	2.72858	2.26563	2.70932	2.60575	1.27481			Breast_SE_109_1	1	33125042	33145042
Breast_SE_5462_12	22	42707322	42727322	0	0	0	0	2.9775	2.39084	2.0702	2.53868	2.31383	1.73119	0	2.13451	2.45182	2.57465	2.39463	0.4579			Breast_SE_109_2	1	33145042	33165042
Breast_SE_2427_1	7	99358644	99378644	4.49727	0	0	4.1506	3.40395	2.7383	2.68408	2.72561	2.61698	1.87572	2.63562	2.57544	2.62636	2.87728	2.84006	1.928			Breast_SE_109_3	1	33165042	33185042
Breast_SE_3411_4	11	12076644	12096644	2.65632	0	0	0	3.10545	2.03035	0	2.72428	1.91729	2.65788	2.87333	2.30292	3.00343	1.55831	2.20666	1.66138			Breast_SE_110_1	1	33214303	33234303
Breast_SE_1904_4	6	1609424	1629424	6.59914	0.700402	0	0	2.10432	2.97927	2.90397	2.55347	3.00155	1.56384	2.70803	2.68376	2.36564	2.14644	3.02441	0			Breast_SE_110_2	1	33234303	33254303
Breast_SE_4611_17	17	1089023	1109023	3.9039	3.30123	1.093	1.58486	0	2.05606	2.42794	2.18044	2.02568	2.07321	2.17302	2.18389	2.60512	2.66979	2.46785	2.19411			Breast_SE_110_3	1	33254303	33274303
Breast_SE_5423_4	22	30212936	30232936	4.82195	0	0	0	3.85459	2.36576	1.68118	2.72101	1.80641	2.51738	2.47719	2.34551	2.79581	2.48095	2.82558	0			Breast_SE_110_4	1	33274303	33294303
Breast_SE_433_3	1	206452999	206472999	3.52777	0	0	0	1.81525	1.7168	2.45408	2.78509	0	1.55678	2.27788	1.4901	2.57831	2.40439	2.30633	2.2488			Breast_SE_110_5	1	33294303	33314303
Breast_SE_3278_4	10	88984393	89004393	4.5904	0	0	0	0	2.46847	0	2.71121	2.48405	1.76846	2.40583	2.40583	1.64304	2.15311	0.81742	1.51538			Breast_SE_110_6	1	33314303	33334303
Breast_SE_228_2	1	97903130	97923130	4.23668	0	0	0	1.88788	2.53214	2.03222	2.35499	0.38257	2.48279	2.25528	2.16525	2.42697	2.06883	2.00453	0			Breast_SE_110_7	1	33334303	33354303
Breast_SE_4809_1	17	63690806	63710806	3.0879	0	0	0	0.305812	1.94196	2.63455	2.15752	2.42419	0	2.04818	2.70437	1.28207	2.51169	2.03493	1.50657			Breast_SE_110_8	1	33354303	33374303
Breast_SE_3007_8	9	98108501	98128501	3.3743	0	0	2.71611	0.20213	1.13041	0	2.56331	0.881477	2.21161	1.41506	2.3315	2.06945	1.62496	2.42567	1.5303			Breast_SE_110_9	1	33374303	33394303
Breast_SE_388_9	1	183170812	183190812	3.77991	0	0	0	0	1.76159	2.40385	2.31551	1.24058	1.82765	2.13605	1.75098	2.44158	0	1.7983	0			Breast_SE_111_1	1	34732915	34752915
Breast_SE_3924_14	12	124441844	124461844	3.26081	0	0	0	0	0	2.34126	1.94522	1.95623	0	2.15299	1.90232	2.75654	2.58434	2.10214	1.42645			Breast_SE_111_2	1	34752915	34772915
Breast_SE_1104_4	3	50163245	50183245	4.34963	0	3.30177	0	2.00404	2.78783	2.64394	2.83929	0	2.61211	2.35404	2.58358	2.65918	2.61453	2.85815	2.08516			Breast_SE_111_3	1	34772915	34792915
Breast_SE_5432_18	22	35625831	35645831	4.90602	0	2.85719	0.26285	4.6564	2.78924	1.97196	2.80793	2.19087	2.69321	2.81162	2.58308	2.58463	2.34057	2.86481	1.3519			Breast_SE_111_4	1	34792915	34812915
Breast_SE_5376_9	21	45422660	45442660	4.7827	0	0	0	1.03748	2.31024	2.83037	2.37038	2.20736	0	2.70224	2.8664	2.37604	2.64042	2.60937	0.465647			Breast_SE_111_5	1	34812915	34832915
Breast_SE_5059_10	19	35140857	35160857	2.82061	0	0	0	2.5717	2.87396	1.49765	2.69972	2.61299	1.10851	2.53646	2.65579	2.64573	2.20928	2.80892	0			Breast_SE_111_6	1	34832915	34852915
Breast_SE_4859_20	17	77456384	77476384	6.21607	0	0	0	3.22576	2.51813	3.03811	2.89848	0	2.4814	2.41928	2.92471	2.24147	2.06625	2.75461	1.90235			Breast_SE_111_7	1	34852915	34872915
Breast_SE_4416_4	15	96262712	96282712	5.58359	0	0	0	0	2.00785	2.19483	2.02734	0	2.05834	1.64899	1.33574	2.63819	1.72086	1.42622	0			Breast_SE_112_1	1	35501279	35521279
Breast_SE_2442_2	7	102281353	102301353	3.34037	0	0	1.04698	1.83198	2.07922	2.67365	2.47411	2.34907	0	1.96685	2.66053	2.02293	2.70402	2.71282	1.58926			Breast_SE_112_2	1	35521279	35541279
Breast_SE_5369_1	21	43179985	43199985	0	0	0	0	0	0	0	1.88808	0.437821	2.65002	0	1.74293	2.0615	1.12789	2.73046	1.39964			Breast_SE_112_3	1	35541279	35561279
Breast_SE_2035_3	6	43074852	43094852	3.87822	0	0	0	2.31757	2.45357	2.64188	2.55822	2.10115	2.67911	2.2166	2.7206	0	2.23611	2.84035	1.77898			Breast_SE_113_1	1	36080028	36100028
Breast_SE_1385_2	4	2730732	2750732	2.88529	0	0	0	0.120117	0	1.15701	1.70314	0	1.82951	0	1.88344	2.42781	0.962168	1.70491	1.94737			Breast_SE_113_2	1	36100028	36120028
Breast_SE_3121_3	10	3098836	3118836	4.88364	0	0	2.19305	2.9305	2.64632	1.92059	2.56031	2.29751	1.75616	2.5116	2.54004	2.73328	2.55	1.74439	0.619287			Breast_SE_113_3	1	36120028	36140028
Breast_SE_4111_4	14	49900846	49920846	1.63229	0	0	0	0	2.04438	0	2.03471	1.08742	2.51636	1.78073	1.68927	2.61387	0	1.64902	1.85752			Breast_SE_113_4	1	36140028	36160028
Breast_SE_2040_14	6	44005589	44025589	3.69503	0	0	0	2.22345	2.74259	1.62066	3.06361	0	2.77656	2.71026	1.76963	2.76448	2.31185	2.2907	1.03006			Breast_SE_113_5	1	36160028	36180028
Breast_SE_5442_3	22	38973515	38993515	0	0	3.364	3.00854	1.90661	2.09736	2.15368	2.2149	2.25842	2.18366	2.15401	1.58815	2.12438	2.15112	2.76378	1.69344			Breast_SE_113_6	1	36180028	36200028
Breast_SE_4748_4	17	47237869	47257869	2.2296	0	0	0	0.682019	2.3766	2.55144	2.59633	0	2.15727	2.07442	2.36965	2.47716	1.2494	1.87732	0			Breast_SE_113_7	1	36200028	36220028
Breast_SE_3789_10	12	57893803	57913803	4.19481	0	0	0	1.84854	2.8064	2.10857	0.0918284	1.83354	2.18178	2.54794	2.551	2.25526	2.43749	2.32404	1.08545			Breast_SE_113_8	1	36220028	36240028
Breast_SE_4761_2	17	50269937	50289937	2.41386	0	0	2.95251	0.672875	2.52867	0	2.52299	1.60078	2.0903	2.74414	2.64892	2.81002	1.84396	2.48795	1.11972			Breast_SE_113_9	1	36240028	36260028
Breast_SE_2254_7	7	1928139	1948139	2.08876	0	0	0	0	2.57312	2.46264	2.48194	0.462745	0	2.83457	2.68112	2.84884	2.69676	2.31825	1.27732			Breast_SE_113_10	1	36260028	36280028
Breast_SE_4614_9	17	2064523	2084523	4.2615	0	1.17017	0	0.0306724	0.175166	1.29878	2.76464	0	2.45214	3.03627	2.10678	2.8846	1.79318	2.46922	0.888971			Breast_SE_113_11	1	36280028	36300028
Breast_SE_4905_2	18	22551938	22571938	3.55878	0	3.64103	2.49889	1.64337	2.59532	1.14584	2.71577	1.97168	2.35666	2.69788	1.71394	2.60003	2.17011	2.42208	2.19686			Breast_SE_113_12	1	36300028	36320028
Breast_SE_1425_2	4	30717269	30737269	1.84799	0	2.4026	0	0	2.26124	2.41027	1.89456	2.55355	2.32125	2.7937	2.91315	2.19091	1.32161	1.59488	0			Breast_SE_113_13	1	36320028	36340028
Breast_SE_5306_4	20	62631721	62651721	3.67547	0	0	0	0	2.74701	2.46691	2.06419	2.73963	0	0	2.33922	2.05173	2.80505	2.33087	1.14944			Breast_SE_113_14	1	36340028	36360028
Breast_SE_3411_5	11	12096644	12116644	1.49514	0	0	0	0	2.15962	1.95508	2.11991	2.10998	0	2.62211	1.59312	2.59749	1.39063	1.72659	2.02684			Breast_SE_113_15	1	36360028	36380028
Breast_SE_5386_17	22	17981196	18001196	5.59779	0	2.66089	3.09163	2.77588	2.47045	2.45045	2.42186	2.24612	1.55826	2.58152	2.2859	2.09047	2.56178	2.53774	2.04243			Breast_SE_113_16	1	36380028	36400028
Breast_SE_4740_3	17	44538376	44558376	6.12525	0	0	0	4.59314	3.01333	3.08018	2.47556	1.87792	1.90576	2.94231	2.83234	2.98453	2.74215	2.39738	0.98096			Breast_SE_113_17	1	36400028	36420028
Breast_SE_3036_1	9	112160079	112180079	4.01693	1.32048	0	3.33651	2.05106	1.24157	1.93332	2.0796	2.42533	2.54197	1.57944	2.03966	2.30387	2.43042	2.37556	1.81782			Breast_SE_113_18	1	36420028	36440028
Breast_SE_4726_14	17	41831789	41851789	2.6793	0	0	0	0	1.74451	2.43497	1.8854	2.08769	0	1.59981	1.64513	1.73938	2.23636	1.73516	0.613038			Breast_SE_114_1	1	36474152	36494152
Breast_SE_3263_4	10	78949200	78969200	4.37318	0	0.21495	0	0	0	1.60681	2.84673	0	2.01155	0	2.05443	2.45491	1.78324	2.33091	0			Breast_SE_115_1	1	37443305	37463305
Breast_SE_4989_13	19	2615794	2635794	0	0	0	0	0	0	1.54255	1.24033	2.15755	1.5231	0	1.94653	2.66808	0	2.28941	1.704			Breast_SE_115_2	1	37463305	37483305
Breast_SE_2213_7	6	158060039	158080039	4.26614	0	4.03544	2.2081	1.84783	2.45214	0.919575	2.60946	1.84621	2.51513	2.75029	2.07815	2.78289	2.1952	2.44116	1.87261			Breast_SE_115_3	1	37483305	37503305
Breast_SE_5097_12	19	45233827	45253827	3.45001	0.712879	0.820876	0	0	2.23457	2.41387	2.22941	2.44749	0	2.28356	2.04771	1.90048	2.47608	2.57858	2.00509			Breast_SE_115_4	1	37503305	37523305
Breast_SE_327_1	1	157985626	158005626	5.83273	0	0	2.38795	3.36993	3.04122	2.90882	2.8071	2.34813	2.52442	2.72734	2.92848	2.56815	2.88774	2.7636	0			Breast_SE_115_5	1	37523305	37543305
Breast_SE_285_9	1	145966405	145986405	1.98521	0	0	0	1.29929	0.897086	0	1.99161	0	2.81935	2.34332	2.35144	2.80839	2.24985	2.26952	1.40635			Breast_SE_116_1	1	37960278	37980278
Breast_SE_649_11	2	43024894	43044894	5.32651	0	3.56827	0	1.0566	2.47733	2.90512	2.47503	2.30967	2.87493	2.62703	2.74396	1.94634	1.55239	2.86395	0			Breast_SE_116_2	1	37980278	38000278
Breast_SE_4489_2	16	29605441	29625441	4.92329	0	0	2.41953	4.49209	2.56099	2.69221	2.67941	2.02719	1.99382	2.37147	2.58975	2.28243	2.42179	2.32969	2.14822			Breast_SE_116_3	1	38000278	38020278
Breast_SE_4601_2	16	87445073	87465073	4.4164	0	0	0	2.58598	2.55801	1.65891	2.53726	0	2.18597	2.08733	2.02453	2.42585	1.64478	1.96592	1.28011			Breast_SE_116_4	1	38020278	38040278
Breast_SE_4590_8	16	84613004	84633004	5.08207	0	0	0	3.07764	2.62947	2.48913	2.29442	1.9695	1.81424	2.46933	1.89121	2.50462	2.60512	2.43007	0			Breast_SE_117_1	1	39061175	39081175
Breast_SE_1875_7	5	172450989	172470989	2.33441	0	0	0	1.45428	2.61945	2.03544	2.54995	2.04476	0	2.51564	2.54616	1.65194	2.57213	2.42798	1.29032			Breast_SE_117_2	1	39081175	39101175
Breast_SE_3565_5	11	95141338	95161338	4.53338	0	0	0.17395	0	0.627838	1.89558	2.63358	2.28234	0	2.42955	1.16533	2.72611	1.78141	2.36201	1.02392			Breast_SE_117_3	1	39101175	39121175
Breast_SE_747_4	2	96520893	96540893	0	0	2.27121	0	2.06747	1.86467	1.92535	2.76508	2.27548	2.27565	2.41489	2.33195	1.42911	2.20508	2.72496	0			Breast_SE_117_4	1	39121175	39141175
Breast_SE_3569_18	11	96324415	96344415	5.50753	0	0	0	1.59358	2.45242	2.58006	2.44839	0	2.5851	2.55015	2.36506	2.85123	1.57174	2.73283	0			Breast_SE_117_5	1	39141175	39161175
Breast_SE_5032_3	19	18016395	18036395	1.7063	0	0	0.538529	3.70786	0	1.155	2.60493	1.61891	2.11758	1.86504	2.39606	2.55848	2.46267	2.60885	1.92926			Breast_SE_117_6	1	39161175	39181175
Breast_SE_975_8	2	234495908	234515908	2.64405	0.126534	0	0	0	2.42804	2.58267	2.67955	2.26001	0	2.59852	2.50824	2.42937	1.97481	2.26776	0			Breast_SE_117_7	1	39181175	39201175
Breast_SE_246_12	1	109895526	109915526	6.0504	0	0	3.87869	0	2.46124	2.58557	2.71001	1.94257	1.70525	2.61751	2.56224	2.7728	2.61962	2.49134	0			Breast_SE_117_8	1	39201175	39221175
Breast_SE_2254_4	7	1868139	1888139	3.99715	0	0	0	0	0	1.94447	2.29854	0	2.10907	2.60143	2.35733	2.26906	2.29506	1.19701	0.736028			Breast_SE_117_9	1	39221175	39241175
Breast_SE_4867_23	17	80980159	81000159	2.68465	0.518675	1.93119	0	0	1.5524	2.35196	2.06302	2.37978	0	2.25888	2.07256	2.66348	2.28536	2.38971	2.28375			Breast_SE_118_1	1	39373001	39393001
Breast_SE_3079_2	9	129325459	129345459	6.41467	1.46525	4.46625	4.4755	3.42047	2.86395	2.99096	2.73182	2.57968	2.9943	2.46576	2.88811	2.90615	3.01594	2.84321	1.96968			Breast_SE_118_2	1	39393001	39413001
Breast_SE_5461_5	22	42335056	42355056	4.7001	0	0	0	0	1.72146	1.76699	2.26268	1.99514	0	1.90615	2.13699	0.740104	2.72451	2.65041	1.22946			Breast_SE_118_3	1	39413001	39433001
Breast_SE_3014_2	9	106857667	106877667	5.44717	0	3.73172	0.847213	3.58134	2.58923	2.09496	2.73473	2.22657	2.14225	2.32053	2.60803	2.76904	2.82698	1.67511	1.46501			Breast_SE_119_1	1	39872643	39892643
Breast_SE_3264_8	10	79169217	79189217	5.11591	0	0	1.67997	2.09261	1.69828	2.47731	2.84213	0	1.7603	2.50983	2.4776	2.21937	2.64998	2.72383	1.20299			Breast_SE_119_2	1	39892643	39912643
Breast_SE_5412_3	22	26572933	26592933	1.92432	0	0	2.70599	1.87604	0	1.61985	2.62979	2.13132	1.53075	2.11191	2.28469	2.1717	2.4437	2.35243	1.76238			Breast_SE_120_1	1	39895213	39915213
Breast_SE_87_2	1	27862740	27882740	2.16504	0	2.51561	0	1.13215	1.9841	1.57649	2.67771	0	2.07264	1.65066	1.97117	2.1742	2.02277	2.01648	0.722202			Breast_SE_120_2	1	39915213	39935213
Breast_SE_4601_3	16	87465073	87485073	3.53599	0	0	0	1.88556	2.17691	1.30655	2.29262	0	2.10759	1.11557	1.66476	1.66433	0.91242	1.80188	1.09378			Breast_SE_120_3	1	39935213	39955213
Breast_SE_4283_2	15	48871562	48891562	2.74655	0	0	0	1.87153	1.87533	1.6725	2.18628	0.741085	1.54028	2.37123	2.00018	2.05547	2.35936	1.62992	0			Breast_SE_120_4	1	39955213	39975213
Breast_SE_5231_5	20	37337418	37357418	4.84523	0	0	5.03313	2.59596	2.59499	2.55386	2.65269	2.74914	2.5758	2.3292	2.33625	2.27345	2.70357	2.68649	2.17851			Breast_SE_120_5	1	39975213	39995213
Breast_SE_2391_2	7	76273231	76293231	4.46627	3.1928	2.67692	0	2.75065	2.44684	2.32872	2.72011	2.05182	2.53689	2.68026	2.70795	2.47195	2.36884	2.29597	2.18965			Breast_SE_120_6	1	39995213	40015213
Breast_SE_5376_15	21	45542660	45562660	3.10795	0.494967	0	0	1.9863	2.16076	2.22756	2.41706	2.64867	0	2.08056	2.51761	2.11028	2.68012	2.39813	1.44435			Breast_SE_120_7	1	40015213	40035213
Breast_SE_343_12	1	164768104	164788104	3.50216	0	0	0	4.27573	2.17566	2.01368	2.2115	1.56612	2.91328	2.00945	1.69203	2.0946	1.5493	2.61972	1.17211			Breast_SE_120_8	1	40035213	40055213
Breast_SE_1221_14	3	126996629	127016629	5.60709	0	0	0.708919	0	0	2.89857	2.21057	2.25763	2.04547	2.92911	2.18317	2.4604	0	3.03511	0.882155			Breast_SE_120_9	1	40055213	40075213
Breast_SE_2259_4	7	4666627	4686627	3.85044	2.46499	0	3.21335	2.48639	2.83114	2.58268	2.76535	2.74711	1.55715	2.78319	2.85445	2.79306	2.84957	2.68173	2.10404			Breast_SE_120_10	1	40075213	40095213
Breast_SE_2462_8	7	116519197	116539197	6.05914	0	0	0	4.1037	3.01265	2.69489	2.9947	2.34157	2.27693	2.90275	2.78688	2.92373	2.46098	2.1308	0			Breast_SE_120_11	1	40095213	40115213
Breast_SE_2248_7	7	175080	195080	4.17883	0	0	0	0	2.83367	0	2.76669	2.51574	0	2.82472	2.79156	2.2197	2.82128	2.32362	2.03374			Breast_SE_121_1	1	40300809	40320809
Breast_SE_2279_9	7	18500623	18520623	2.25359	0	0	0	0	2.44946	2.28166	1.7066	0	2.66222	2.30785	1.21791	2.41363	1.94289	2.16335	0			Breast_SE_122_1	1	40369331	40389331
Breast_SE_5360_2	21	41912528	41932528	3.30154	0	0	0	0	0	1.47663	2.28967	1.71434	2.45242	2.62381	2.01564	2.23277	0	2.41099	0			Breast_SE_122_2	1	40389331	40409331
Breast_SE_133_9	1	43568450	43588450	3.72259	0	0	0	0	0	2.07522	2.17868	0	0.733442	0	1.79505	2.16434	2.3646	2.6012	1.38888			Breast_SE_123_1	1	40689935	40709935
Breast_SE_3581_3	11	107849800	107869800	4.63006	0.0844572	0.689358	0	3.06063	0.0405818	2.16776	2.34733	1.72225	2.20338	0	2.05776	2.66111	1.82528	2.39813	2.04285			Breast_SE_123_2	1	40709935	40729935
Breast_SE_732_1	2	75552971	75572971	2.99605	0	0	0	0	2.67169	2.63498	2.54924	1.28886	0	2.60277	2.6755	2.22168	2.53821	2.47389	0			Breast_SE_124_1	1	40769592	40789592
Breast_SE_4841_2	17	72113629	72133629	5.70957	2.13864	4.74378	0	1.40987	2.83134	1.53894	3.02387	1.53383	2.31556	2.38786	2.71111	2.79324	2.46987	2.86938	2.12076			Breast_SE_124_2	1	40789592	40809592
Breast_SE_4157_27	14	68952182	68972182	4.46852	0	0	0	2.39023	2.48133	2.21797	2.5618	0	2.14245	2.26028	2.39532	2.60081	1.27901	2.35235	0.54282			Breast_SE_124_3	1	40809592	40829592
Breast_SE_788_4	2	119229936	119249936	1.44349	0	1.70455	0	0	2.10299	0	2.50029	0	2.32168	2.5806	2.01619	2.39355	2.03426	2.44573	2.01405			Breast_SE_124_4	1	40829592	40849592
Breast_SE_4862_13	17	78332130	78352130	5.72269	0	0	0	4.1447	2.75614	2.61262	2.79011	2.57401	2.11041	2.76767	2.76773	2.99617	2.62517	2.03786	0			Breast_SE_124_5	1	40849592	40869592
Breast_SE_3289_2	10	97526537	97546537	5.69526	0	4.1471	0	3.8139	2.81268	2.23553	2.7007	1.36813	2.32568	2.54869	2.35468	2.68896	2.45361	2.50277	2.03785			Breast_SE_124_6	1	40869592	40889592
Breast_SE_952_1	2	226638502	226658502	4.16198	0	0	0	0	1.6215	1.76933	2.60653	0	2.36962	2.13647	2.54798	2.66252	0	2.24135	0			Breast_SE_124_7	1	40889592	40909592
Breast_SE_3110_37	9	136997069	137017069	2.98869	0	0	0	0.75405	0	2.59489	0	2.50407	1.82647	1.91057	2.12619	2.03762	2.18227	2.49409	1.12188			Breast_SE_124_8	1	40909592	40929592
Breast_SE_3628_4	11	126317677	126337677	3.37705	0	0.674162	0	0	2.18045	0	2.70136	0	1.58843	2.3255	2.22093	2.26313	1.72595	2.35315	0.49023			Breast_SE_124_9	1	40929592	40949592
Breast_SE_3794_7	12	62719032	62739032	5.34353	0	3.4823	0	3.29334	3.0446	2.13526	2.58839	0.865848	2.23592	2.77544	2.58211	2.6553	1.91339	2.50293	1.94297			Breast_SE_124_10	1	40949592	40969592
Breast_SE_4735_4	17	43395542	43415542	3.60946	1.67883	0	1.72731	3.66499	1.90149	2.73195	2.51184	1.64626	2.05997	2.61092	2.13499	2.6743	2.13252	2.07313	1.97627			Breast_SE_124_11	1	40969592	40989592
Breast_SE_15_11	1	9876872	9896872	3.80537	0	2.85459	0	2.44709	2.52175	1.58337	2.66614	1.84543	2.85411	1.92196	2.57391	2.79331	0	2.3772	2.16569			Breast_SE_124_12	1	40989592	41009592
Breast_SE_1972_5	6	25186432	25206432	3.27217	0	0	0	0	2.41904	0	2.03176	0	2.65922	2.3665	2.32166	1.90217	0.937233	2.58501	2.31544			Breast_SE_124_13	1	41009592	41029592
Breast_SE_3308_5	10	102619238	102639238	5.79972	0	1.543	0	2.64216	2.85018	2.81743	2.88762	2.59257	0	2.79949	2.77824	3.13817	2.87314	2.68927	1.13245			Breast_SE_125_1	1	41311840	41331840
Breast_SE_4215_17	14	100276339	100296339	4.79185	2.44796	4.18295	3.21547	3.44703	2.50305	2.62762	2.62921	2.34262	2.66462	2.29653	2.62514	2.3455	2.49285	2.49754	2.57728			Breast_SE_125_2	1	41331840	41351840
Breast_SE_873_4	2	187537117	187557117	4.95048	0	0	5.07702	0	2.3908	2.62698	2.61451	0.930117	2.89989	2.13599	2.16691	2.91277	1.9977	2.38959	1.52795			Breast_SE_125_3	1	41351840	41371840
Breast_SE_4603_9	16	88380362	88400362	5.22949	0	3.59059	0	0	1.968	0	2.67607	2.53293	1.40556	2.53086	2.16982	2.24226	1.70006	3.10773	1.81423			Breast_SE_125_4	1	41371840	41391840
Breast_SE_4386_12	15	84913296	84933296	4.63343	0	1.47248	3.47873	1.99862	2.7191	1.77945	2.69248	1.56882	1.66949	2.47762	2.5034	1.71221	1.92749	2.6113	1.39606			Breast_SE_125_5	1	41391840	41411840
Breast_SE_577_6	2	9235206	9255206	4.13042	0	0	0	4.52335	2.42915	1.67298	2.7742	1.89758	2.83742	2.78094	2.54193	2.94662	2.58841	2.62134	0			Breast_SE_125_6	1	41411840	41431840
Breast_SE_5585_1	X	153753422	153773422	5.15933	0.969349	3.05819	0	0	0	2.18819	2.60767	1.76688	0.970039	2.57712	2.64465	2.62672	2.98814	2.8672	1.4281			Breast_SE_125_7	1	41431840	41451840
Breast_SE_4602_4	16	87796622	87816622	3.67882	1.50013	2.4019	0	3.61777	1.63806	2.64586	2.49376	2.19998	2.4322	2.69548	1.9339	2.66654	1.62034	2.36107	1.86737			Breast_SE_125_8	1	41451840	41471840
Breast_SE_1874_5	5	172172946	172192946	4.84915	2.942	2.33	3.40474	3.14163	2.6337	2.28782	2.7474	2.24737	1.97025	2.70354	2.72098	3.0081	2.7014	2.5434	1.94878			Breast_SE_125_9	1	41471840	41491840
Breast_SE_4047_1	13	110936449	110956449	1.4871	0	0	0	0	2.20006	0	2.03625	0	2.06031	2.29136	2.39633	2.18151	2.34036	2.10969	0			Breast_SE_125_10	1	41491840	41511840
Breast_SE_5_3	1	3489793	3509793	3.41054	0	2.50086	0	0	3.20098	1.52431	2.26864	2.59869	0	2.93134	2.5238	2.53925	2.94427	2.54387	1.71482			Breast_SE_125_11	1	41511840	41531840
Breast_SE_3007_13	9	98208501	98228501	5.48194	0	0	2.70028	4.49181	2.91298	1.39133	2.41574	2.08932	2.68245	2.62835	2.62717	2.87331	1.59763	2.8371	2.24992			Breast_SE_125_12	1	41531840	41551840
Breast_SE_62_1	1	22726274	22746274	3.6743	0	0	0	0	0	0	2.1766	0.609867	1.36749	2.47412	2.29424	2.46703	1.79879	2.6042	0			Breast_SE_126_1	1	41605383	41625383
Breast_SE_3502_30	11	64322048	64342048	4.22336	0	0	0	3.75224	0	1.7276	2.62808	2.53636	2.39537	1.97937	1.80752	2.45793	2.40588	2.5177	0.818834			Breast_SE_126_2	1	41625383	41645383
Breast_SE_5461_10	22	42435056	42455056	3.93461	0	1.88621	0	0	0	1.39209	2.55522	0.918683	1.96876	2.01354	2.32537	0.497605	2.32455	2.54358	1.745			Breast_SE_126_3	1	41645383	41665383
Breast_SE_5247_5	20	44183744	44203744	5.83162	0	0	0	4.84082	2.79408	1.58426	2.72792	1.24656	2.64055	2.83859	2.73035	2.30723	2.06664	2.59889	1.51949			Breast_SE_126_4	1	41665383	41685383
Breast_SE_5412_1	22	26532933	26552933	0.911029	0	0	0	0	0	0	2.47224	0	2.80744	2.29956	2.16757	2.40978	1.68611	1.63744	2.1009			Breast_SE_126_5	1	41685383	41705383
Breast_SE_5018_10	19	13082862	13102862	4.77131	0	1.51236	1.44036	1.78622	2.68756	2.70076	2.43654	2.3101	0	1.60817	2.51622	2.37467	2.69551	2.87031	1.49816			Breast_SE_127_1	1	41794884	41814884
Breast_SE_322_5	1	155961803	155981803	6.90372	0.115288	3.64162	4.39298	4.348	3.02742	2.79327	2.9966	2.41736	2.40132	2.88916	2.69969	3.05412	2.89831	2.84516	2.49084			Breast_SE_127_2	1	41814884	41834884
Breast_SE_2452_3	7	106707775	106727775	3.15712	0	0	0	0	1.6623	0	2.1506	0	2.40609	1.94804	1.46019	2.1719	1.32343	2.27689	0			Breast_SE_127_3	1	41834884	41854884
Breast_SE_101_2	1	31561877	31581877	5.72879	0	2.81013	0	0	0	0	2.69203	2.3242	2.94323	2.1095	2.29761	2.51799	2.60454	2.78213	0			Breast_SE_127_4	1	41854884	41874884
Breast_SE_940_1	2	219673174	219693174	4.85513	0	0	0	1.98531	2.47903	1.97602	2.12728	1.00259	2.84192	2.49105	1.34781	2.45962	0	2.65813	1.46116			Breast_SE_127_5	1	41874884	41894884
Breast_SE_1994_5	6	33422613	33442613	4.57482	0	0	0	3.68058	2.64488	2.4833	2.59038	2.44531	0.322908	2.48261	2.34106	2.60061	2.58031	2.50333	1.8561			Breast_SE_127_6	1	41894884	41914884
Breast_SE_4355_3	15	74186701	74206701	6.62542	0	0	0	0.0923568	3.00029	0	3.14908	1.69951	2.76072	2.87088	2.80022	0	2.14801	2.82694	1.38526			Breast_SE_127_7	1	41914884	41934884
Breast_SE_433_5	1	206492999	206512999	0	0	0	0	0.315041	0	0	2.4869	2.06561	1.51322	2.08896	1.99892	2.36768	0	2.57967	1.03			Breast_SE_128_1	1	42731676	42751676
Breast_SE_5438_20	22	37424052	37444052	2.17018	0	0	0	3.87957	2.64972	2.118	2.73628	2.45604	1.62725	2.49239	2.67221	2.39478	2.46801	2.37019	0			Breast_SE_128_2	1	42751676	42771676
Breast_SE_4635_4	17	7437568	7457568	2.23096	0	1.67931	3.13512	3.41684	2.11766	2.17916	2.61433	2.57341	1.79209	2.34109	2.00998	2.62349	2.87573	2.33114	1.25173			Breast_SE_129_1	1	42911993	42931993
Breast_SE_56_5	1	21292925	21312925	2.63009	0	0	0	0.0822587	0.921932	1.38663	2.7319	0	0	2.13635	2.15765	2.46553	1.35701	2.39298	1.55293			Breast_SE_129_2	1	42931993	42951993
Breast_SE_3028_2	9	110747931	110767931	2.40227	0	0.26182	0	0	2.65791	0	2.40475	0	2.60185	1.28258	2.49556	2.64868	1.23121	1.7821	0			Breast_SE_129_3	1	42951993	42971993
Breast_SE_5027_1	19	16812239	16832239	3.43542	0.868799	0.211991	0	4.81052	1.72017	2.05153	2.29434	2.19909	2.42386	1.82296	2.28982	2.43563	2.51018	2.62618	1.12254			Breast_SE_129_4	1	42971993	42991993
Breast_SE_4558_6	16	70465891	70485891	4.45516	0	3.17596	0	0	0	2.05543	2.33282	0	2.35741	1.89997	2.58357	2.22929	2.24119	2.3895	1.75826			Breast_SE_129_5	1	42991993	43011993
Breast_SE_4867_16	17	80840159	80860159	5.4461	0	3.02047	0	4.18101	2.64196	1.93044	2.93074	2.20449	1.98644	2.87479	2.54142	2.90867	2.66341	2.08198	1.06156			Breast_SE_130_1	1	42999309	43019309
Breast_SE_274_3	1	116481249	116501249	1.55112	0	0	0	0	0	2.36834	2.29273	0	2.59626	1.68472	2.16592	2.68862	0	2.59613	0.433472			Breast_SE_130_2	1	43019309	43039309
Breast_SE_5119_1	19	51676019	51696019	5.99449	0	4.81979	0	4.51438	2.80169	2.94212	2.79634	2.7008	2.19777	2.73468	2.60467	2.68757	2.90174	2.86022	2.25697			Breast_SE_130_3	1	43039309	43059309
Breast_SE_4853_16	17	75673708	75693708	5.26763	0	2.74866	0	5.51552	1.6831	2.28751	2.72475	2.17716	3.00848	2.10788	2.88686	2.96171	2.3814	2.72021	1.3807			Breast_SE_130_4	1	43059309	43079309
Breast_SE_86_14	1	27553977	27573977	5.41617	2.80105	4.48219	2.13457	3.44317	2.65397	2.74751	2.82761	2.58422	2.17434	2.57929	2.66427	2.70794	2.94974	2.7929	2.14917			Breast_SE_131_1	1	43256479	43276479
Breast_SE_3749_2	12	47081082	47101082	4.26744	0	0.985231	3.60831	1.08625	1.79986	2.34541	2.49857	0.678326	2.51076	2.4201	1.86364	2.74374	1.50129	1.98856	2.44345			Breast_SE_131_2	1	43276479	43296479
Breast_SE_2538_5	8	1812054	1832054	2.21591	0	0	0	1.87448	2.32618	2.38659	2.16157	2.44784	0	2.23352	1.91561	2.07784	2.58012	2.20208	0.982171			Breast_SE_131_3	1	43296479	43316479
Breast_SE_1738_2	5	87115920	87135920	3.78692	0	0	0	0	2.7072	0	1.86573	0	2.18824	1.88593	1.15645	2.78525	1.77735	1.90942	2.11859			Breast_SE_132_1	1	43326697	43346697
Breast_SE_5399_3	22	21950323	21970323	3.53907	0	0.485016	1.55427	0	1.87133	2.18843	2.04531	0.582239	0	1.89168	1.96558	2.19828	1.90606	2.37354	1.74909			Breast_SE_132_2	1	43346697	43366697
Breast_SE_5021_13	19	15231368	15251368	4.60371	0	0.935519	1.9055	5.75482	2.53533	2.75686	3.04558	2.48856	2.32319	2.92299	3.02125	2.48304	2.6291	3.08898	1.56196			Breast_SE_132_3	1	43366697	43386697
Breast_SE_142_3	1	46191839	46211839	3.58041	2.4063	3.30427	2.56141	1.7115	2.56722	2.35076	2.43306	1.94094	1.61375	2.36223	2.4118	2.31455	2.15892	2.51972	1.70984			Breast_SE_132_4	1	43386697	43406697
Breast_SE_3079_23	9	129745459	129765459	5.24321	0	0.189416	0	5.40906	2.50766	2.24043	2.37744	1.45756	2.75109	2.20858	2.18372	2.63946	2.39652	2.71208	1.54478			Breast_SE_133_1	1	43408450	43428450
Breast_SE_1690_6	5	57488494	57508494	2.41334	0	0	0	0	1.64936	1.96033	2.20502	0	2.41278	2.16216	2.29372	2.52778	0	1.99626	0			Breast_SE_133_2	1	43428450	43448450
Breast_SE_62_2	1	22746274	22766274	3.75382	0	0	0	0.562527	0	0	1.98592	1.60791	2.29878	2.35156	1.21495	2.37561	1.40141	2.61708	0			Breast_SE_133_3	1	43448450	43468450
Breast_SE_3962_4	13	30416695	30436695	3.30968	0	1.19672	1.59629	3.77114	2.56054	1.80361	2.26381	2.07973	2.27437	2.10504	1.60263	2.02219	2.08955	1.89131	1.55118			Breast_SE_133_4	1	43468450	43488450
Breast_SE_4590_9	16	84633004	84653004	4.03972	0	2.10169	0	0.306776	2.20926	2.03345	1.74303	2.06608	0	2.0911	1.44604	2.42804	2.21363	2.35416	1.94226			Breast_SE_133_5	1	43488450	43508450
Breast_SE_3250_7	10	72275407	72295407	4.15071	0	3.11018	0	1.34073	2.79619	2.65097	2.65356	2.13634	2.66076	1.09586	1.8425	2.61244	0	2.51074	2.46815			Breast_SE_133_6	1	43508450	43528450
Breast_SE_5396_3	22	20517079	20537079	6.28419	0.974326	0.0790816	0	4.90245	1.85161	2.01335	2.33637	1.58083	2.76518	2.81412	2.18671	2.84897	2.40045	2.49785	1.9225			Breast_SE_133_7	1	43528450	43548450
Breast_SE_729_10	2	74544957	74564957	3.10672	0	0	0	3.07727	1.77877	2.55422	2.62597	2.12574	0	2.98384	2.70606	2.68712	2.80686	2.3406	2.12895			Breast_SE_133_8	1	43548450	43568450
Breast_SE_1189_4	3	107980578	108000578	3.26598	0	1.13575	0	0	2.11842	1.6227	2.31856	0	2.98642	0	1.48452	1.80709	0.547525	2.30489	1.61812			Breast_SE_133_9	1	43568450	43588450
Breast_SE_4570_3	16	74999555	75019555	2.98338	0	1.27323	1.20089	4.23826	1.2906	2.10171	2.10566	2.3138	2.83452	2.07548	2.15045	2.45422	2.50931	2.72689	0.56547			Breast_SE_133_10	1	43588450	43608450
Breast_SE_3751_3	12	47737437	47757437	4.20401	0	2.95537	0	0	0	2.36453	2.55471	2.28629	2.77547	1.95807	1.84304	2.70754	0	2.73873	1.14071			Breast_SE_133_11	1	43608450	43628450
Breast_SE_40_10	1	17225073	17245073	5.65039	0	0	0	3.13137	2.86017	2.46767	2.92064	1.65463	2.93072	2.50117	2.19927	2.37656	0	2.7815	0.917028			Breast_SE_134_1	1	43810593	43830593
Breast_SE_5059_9	19	35120857	35140857	0	0	0.803421	1.29495	0	1.52312	1.81999	2.54683	2.78269	2.77633	1.49389	2.63839	0	0.708693	2.89775	2.1645			Breast_SE_134_2	1	43830593	43850593
Breast_SE_416_17	1	201734922	201754922	0.726872	0	0	0	0.835228	2.91701	0	2.56291	0	2.49362	2.72047	2.74667	1.74281	1.63396	2.60569	2.21774			Breast_SE_134_3	1	43850593	43870593
Breast_SE_2248_2	7	75080	95080	5.247	0	0	0	0	2.78016	0	3.02479	0	2.28708	2.81043	2.9523	2.73277	2.41358	1.77359	0			Breast_SE_134_4	1	43870593	43890593
Breast_SE_4334_5	15	67067593	67087593	4.77058	0	0	2.55194	2.66926	1.78115	1.94413	2.84572	0	2.40121	2.61299	2.56023	2.68199	2.25441	2.34681	1.82973			Breast_SE_134_5	1	43890593	43910593
Breast_SE_590_2	2	12695971	12715971	2.6487	0	0	0	0	2.04251	0	2.32852	0	2.95562	1.93354	2.07443	2.13329	1.26819	1.72255	0			Breast_SE_134_6	1	43910593	43930593
Breast_SE_5090_8	19	42314621	42334621	4.09062	0	0.524188	2.08203	0.0858575	2.29502	2.32444	2.1173	1.83951	0	2.40668	1.82535	2.2637	1.87991	2.31447	1.69832			Breast_SE_134_7	1	43930593	43950593
Breast_SE_124_6	1	40869592	40889592	2.83763	0	0	0	0.801607	2.46013	0	2.59898	2.29891	2.3101	0.7814	1.38223	2.63314	0	2.78498	0.432603			Breast_SE_134_8	1	43950593	43970593
Breast_SE_3272_2	10	86941966	86961966	4.94948	0	0.98947	0	2.0893	0	3.05066	1.80645	2.88022	2.21399	1.77887	0.894752	2.25103	2.42679	2.73555	2.21131			Breast_SE_134_9	1	43970593	43990593
Breast_SE_5405_7	22	24239714	24259714	6.07118	0	3.77788	0	0.246148	2.57015	0	2.84592	0.751007	2.38059	2.87712	2.84653	2.71579	1.678	2.6014	1.899			Breast_SE_134_10	1	43990593	44010593
Breast_SE_51_3	1	19784660	19804660	3.99725	2.23275	0.907281	2.32368	2.37731	1.47784	1.86457	2.56594	2.3592	1.87775	2.42484	2.0309	2.18972	2.2957	2.32612	2.43163			Breast_SE_134_11	1	44010593	44030593
Breast_SE_3108_5	9	135984235	136004235	3.53301	0	0	0	0	0	2.485	2.61657	1.90094	0	0	2.47144	2.6778	2.82567	1.78973	0.0776621			Breast_SE_134_12	1	44030593	44050593
Breast_SE_134_11	1	44010593	44030593	3.41635	1.63086	4.7914	1.68775	2.62327	2.34893	2.32282	2.33639	1.93968	2.25725	2.52161	2.20096	2.45318	1.97298	2.63295	2.10285			Breast_SE_134_13	1	44050593	44070593
Breast_SE_2434_4	7	100589489	100609489	4.12456	0	0	0	2.57488	2.14577	2.61447	2.82678	1.96211	0	2.51955	2.82335	2.08237	2.61878	1.81586	2.2892			Breast_SE_134_14	1	44070593	44090593
Breast_SE_37_5	1	16065388	16085388	3.52489	0	0	0	2.33174	1.04327	1.59434	2.36167	1.99998	0	2.18559	2.3256	2.22046	1.66191	2.0591	1.11699			Breast_SE_135_1	1	44546529	44566529
Breast_SE_1819_4	5	140336992	140356992	2.99646	0	0	0	0	0.643052	0	1.48717	2.34833	1.74772	1.74685	0.692374	2.64225	1.94825	1.67562	0			Breast_SE_136_1	1	44711726	44731726
Breast_SE_1427_3	4	37969823	37989823	3.54037	0	0	2.0647	1.42134	0.297271	2.07887	1.96735	1.74163	2.20064	1.88466	1.65488	1.80765	1.99823	2.52003	0			Breast_SE_136_2	1	44731726	44751726
Breast_SE_3131_11	10	5611208	5631208	0	0	3.56038	0	0	2.17763	1.72401	1.53686	2.62179	2.28393	0.839471	2.61306	2.45537	0	2.46804	1.46806			Breast_SE_136_3	1	44751726	44771726
Breast_SE_2623_6	8	41778461	41798461	3.60245	0	0	0	2.07847	2.88762	1.984	2.7282	2.23	2.24366	2.89014	2.76114	2.5326	0.267465	1.87605	0			Breast_SE_136_4	1	44771726	44791726
Breast_SE_4218_2	14	100684904	100704904	0	0	0	0	0	2.97168	0	2.26396	1.96621	1.92633	2.63458	2.54322	2.8596	2.17236	0	2.32236			Breast_SE_136_5	1	44791726	44811726
Breast_SE_2349_3	7	44991304	45011304	2.51789	0.64365	3.09052	3.35098	3.04265	2.39896	2.15579	2.27878	1.79381	2.00542	2.04061	2.2731	2.1899	2.28037	2.16383	1.76936			Breast_SE_136_6	1	44811726	44831726
Breast_SE_102_5	1	31685062	31705062	5.93502	0	0	2.38754	3.29504	3.05802	0	3.06956	2.09514	2.59216	2.96562	2.71844	2.39049	2.98489	2.97062	1.23011			Breast_SE_136_7	1	44831726	44851726
Breast_SE_3017_2	9	107723615	107743615	2.97465	0	0	0	0	2.45611	0	2.30772	0	2.45331	2.38493	1.63711	1.97484	1.94086	1.40477	2.14026			Breast_SE_136_8	1	44851726	44871726
Breast_SE_3780_3	12	55930751	55950751	0.789936	0	2.28472	0	1.14108	0	1.85955	1.74579	2.13278	2.14442	1.68236	1.56286	2.35724	0.701913	1.68209	2.00158			Breast_SE_137_1	1	45301982	45321982
Breast_SE_2830_22	8	130351408	130371408	5.41572	0	1.63358	0	2.36116	2.68413	2.09859	2.58364	2.42295	0	2.58249	2.57968	2.51926	2.72656	2.11051	1.7569			Breast_SE_137_2	1	45321982	45341982
Breast_SE_5462_13	22	42727322	42747322	0	0	0	0	3.88324	2.00866	1.21902	2.57396	1.44372	2.26163	2.44355	2.49043	1.97741	0.958044	2.45947	0.842458			Breast_SE_137_3	1	45341982	45361982
Breast_SE_107_7	1	32791008	32811008	4.29082	0	0	0	1.23415	2.00829	0	2.50459	0	1.8292	2.4307	1.96182	2.15995	1.48411	2.28245	0.824102			Breast_SE_138_1	1	45477489	45497489
Breast_SE_5475_12	22	46501660	46521660	3.55431	0	0	1.77206	3.14192	0	2.38031	2.68328	1.78915	2.38489	0.277334	2.19885	2.10139	2.14153	2.53288	1.53169			Breast_SE_138_2	1	45497489	45517489
Breast_SE_4636_2	17	7540121	7560121	4.46032	0	4.74145	0	0	0.546322	2.6309	2.03149	2.20565	2.43736	1.97763	1.10623	2.51449	2.75516	2.59899	2.22385			Breast_SE_138_3	1	45517489	45537489
Breast_SE_86_11	1	27493977	27513977	4.00262	0	0	0	0.490418	0	2.32324	1.86285	1.44855	2.41462	2.21664	2.70945	1.72978	0	1.18179	2.23321			Breast_SE_138_4	1	45537489	45557489
Breast_SE_736_5	2	85395779	85415779	5.08738	0	5.01867	0	2.11187	2.87964	1.72417	1.52043	1.657	2.74848	2.83982	2.53276	2.85904	1.86019	2.72157	2.44804			Breast_SE_138_5	1	45557489	45577489
Breast_SE_4594_26	16	85746656	85766656	4.3415	0	4.53231	0	0.415409	0	1.15483	2.33265	2.69991	2.66893	1.45547	1.82082	2.1641	2.50719	2.84882	2.19541			Breast_SE_138_6	1	45577489	45597489
Breast_SE_4488_8	16	29247153	29267153	3.68544	0	4.92908	2.4626	0	2.7252	1.57835	2.70021	2.01784	1.79477	2.6391	2.29847	2.69208	1.75842	2.57544	1.67439			Breast_SE_139_1	1	45676852	45696852
Breast_SE_782_15	2	113275712	113295712	4.33533	0	0	0	2.08106	2.50173	2.95331	2.09426	1.51278	2.94127	2.54706	1.29105	2.37666	0	2.80542	1.08573			Breast_SE_140_1	1	45677781	45697781
Breast_SE_2250_7	7	525076	545076	4.54913	0	0	0.090563	4.79871	0	2.26054	2.8289	2.90496	2.09915	2.80571	2.85514	2.85711	2.88413	2.78833	1.04874			Breast_SE_141_1	1	46123185	46143185
Breast_SE_4772_3	17	57868915	57888915	5.85557	0	3.67628	0	3.73925	2.42678	2.84654	2.8812	2.28211	1.87652	2.86656	2.90413	2.90451	2.90612	2.65529	0.329554			Breast_SE_142_1	1	46151839	46171839
Breast_SE_4428_3	15	100697208	100717208	5.83629	0	1.97205	0	2.40309	2.36907	0	2.54662	2.03157	2.86841	2.70213	2.63288	2.39806	2.38143	2.67758	0			Breast_SE_142_2	1	46171839	46191839
Breast_SE_3471_1	11	45790890	45810890	3.11564	1.01535	2.33245	5.0006	1.36759	2.48644	2.13516	2.52407	2.39075	2.75384	2.38164	2.15266	2.44315	2.77136	2.64582	1.84692			Breast_SE_142_3	1	46191839	46211839
Breast_SE_4853_22	17	75793708	75813708	3.25757	0	0	0	0	0.712785	1.30113	2.56818	0	1.60999	1.38972	2.47618	0	2.07049	2.32074	1.15118			Breast_SE_142_4	1	46211839	46231839
Breast_SE_3383_2	11	278688	298688	0	0	0	0	1.51219	0	2.43041	2.2697	2.36608	0	1.73275	2.44597	1.9407	2.61366	2.37939	0.8262			Breast_SE_142_5	1	46231839	46251839
Breast_SE_5375_6	21	44924996	44944996	5.57062	2.26332	1.68951	2.21957	4.49777	2.30793	2.25635	2.06154	2.56826	2.79992	2.54225	2.87371	2.63965	2.57332	2.92383	1.67852			Breast_SE_143_1	1	46265148	46285148
Breast_SE_3253_13	10	73944390	73964390	0	0	0	0	0	1.35143	1.34753	1.67229	0	2.01059	0	1.74197	1.94609	0	2.38519	0			Breast_SE_143_2	1	46285148	46305148
Breast_SE_2352_2	7	46922102	46942102	0.94977	0	0	0	0	1.88667	1.93992	1.99161	0	2.99296	0	1.76882	1.51909	0.603237	2.04035	0			Breast_SE_143_3	1	46305148	46325148
Breast_SE_85_2	1	27100585	27120585	3.38693	0.415833	0.914532	0	1.23483	0	2.03556	2.66719	0	1.68763	2.61941	2.10517	2.37087	2.459	2.32388	1.38758			Breast_SE_143_4	1	46325148	46345148
Breast_SE_86_15	1	27573977	27593977	4.78296	0	1.06609	0	2.20039	2.50641	2.72428	2.56289	1.9368	0	2.49345	2.58179	1.84664	2.82946	2.40709	1.36455			Breast_SE_143_5	1	46345148	46365148
Breast_SE_4202_2	14	93933980	93953980	0	0	0	0	0	0	0	2.23397	0	1.70199	0	1.78705	2.75051	1.25839	2.26453	0			Breast_SE_144_1	1	46738584	46758584
Breast_SE_3894_9	12	113281584	113301584	4.00752	0	0	0	2.97045	1.12392	2.34411	2.06311	0	1.42885	1.92782	2.1648	2.08112	2.19117	2.29399	1.53939			Breast_SE_144_2	1	46758584	46778584
Breast_SE_2298_1	7	26140363	26160363	3.76028	0	0	1.81595	1.24442	0	0	2.60165	2.45798	1.59336	0.306586	1.71707	2.88879	2.29682	2.41593	1.61117			Breast_SE_145_1	1	46779284	46799284
Breast_SE_4157_14	14	68692182	68712182	2.62591	0	0	0	0	2.49007	0.989838	2.91871	0	2.40945	2.14316	2.09642	2.81687	0	2.56854	0			Breast_SE_145_2	1	46799284	46819284
Breast_SE_1988_17	6	31926089	31946089	3.47455	0	0	1.70176	0.561556	1.41761	0.472572	2.26025	0	1.91734	1.98081	2.30592	2.50186	2.136	2.62941	0			Breast_SE_146_1	1	47176472	47196472
Breast_SE_2163_1	6	129486551	129506551	4.20009	0	0	0	0	2.79037	0	2.25909	0	2.70384	2.07877	1.9194	2.60436	1.40654	1.81487	0			Breast_SE_147_1	1	47208355	47228355
Breast_SE_3390_10	11	2869685	2889685	0	0	0	0	0	0	2.07726	2.07384	2.08656	0	0	2.49638	1.911	2.36328	1.94384	0			Breast_SE_147_2	1	47228355	47248355
Breast_SE_5434_3	22	36147111	36167111	3.14851	0	0	0	0	0	0	1.69844	0.238564	1.4382	2.2796	2.20755	1.91057	0.604274	2.30861	0.995705			Breast_SE_147_3	1	47248355	47268355
Breast_SE_33_2	1	15335639	15355639	2.46784	0	0	0	4.19657	0	2.49241	2.72723	1.52478	2.20512	2.48596	2.40126	2.81582	1.97893	2.18172	1.08076			Breast_SE_148_1	1	47312073	47332073
Breast_SE_101_3	1	31581877	31601877	3.88564	0	3.65173	0	1.48397	0	0.913292	2.46843	2.56368	2.20569	2.0182	2.54037	2.37578	2.31045	2.77661	0.522758			Breast_SE_148_2	1	47332073	47352073
Breast_SE_4610_4	17	721178	741178	3.46261	0.525375	0	4.16048	1.71402	2.52352	2.56765	2.25275	2.40738	1.68935	2.32787	2.09046	2.59896	2.66165	2.10267	1.10632			Breast_SE_148_3	1	47352073	47372073
Breast_SE_1368_1	3	197354091	197374091	4.39348	0	0	0	0	1.98061	1.31251	2.18687	0	2.51009	0	1.99807	2.52988	0	1.86675	0			Breast_SE_148_4	1	47372073	47392073
Breast_SE_4779_5	17	59807166	59827166	5.45082	0	0	0.978271	1.74546	2.48598	2.54753	1.87347	0	1.52008	2.17049	2.78901	2.17248	1.48177	1.96925	0.790513			Breast_SE_149_1	1	47540593	47560593
Breast_SE_2213_4	6	158000039	158020039	3.673	2.128	1.84302	0	3.76955	2.05155	1.89705	2.63905	1.78576	2.53288	2.62707	2.57645	2.00127	1.70607	2.58645	1.89779			Breast_SE_149_2	1	47560593	47580593
Breast_SE_5474_1	22	45993316	46013316	7.04263	0	6.21885	2.37414	2.03997	2.71788	2.66598	2.91511	2.64968	2.48676	3.15592	2.95742	2.54371	2.84649	2.76913	1.44623			Breast_SE_149_3	1	47580593	47600593
Breast_SE_4945_10	18	48838015	48858015	4.20377	0	0	0	0.377675	2.36979	3.03422	2.99672	0	2.40561	2.75021	2.46157	1.90566	0	2.44113	1.04448			Breast_SE_150_1	1	47670767	47690767
Breast_SE_3485_4	11	57292693	57312693	5.04916	2.72	4.5692	3.08915	2.75631	2.64528	2.2671	2.62244	2.09059	2.87276	2.28773	2.23366	2.53023	2.49412	2.76353	2.14144			Breast_SE_150_2	1	47690767	47710767
Breast_SE_5440_1	22	38460957	38480957	0.385287	0	0	0	1.95113	2.02069	2.31514	2.22483	1.92794	0	2.46487	1.82741	1.70879	2.20775	2.0411	1.36808			Breast_SE_150_3	1	47710767	47730767
Breast_SE_3108_2	9	135924235	135944235	3.68555	0	0	0	1.38181	0	1.40048	2.30726	2.0366	0	1.60258	1.79436	2.1819	2.63096	2.45587	0.601785			Breast_SE_151_1	1	47981889	48001889
Breast_SE_5085_3	19	41326948	41346948	4.47009	0	0	0	3.05944	0.992295	1.59821	2.24601	1.93435	0	1.41754	2.45435	2.3716	1.95602	2.64531	1.29654			Breast_SE_151_2	1	48001889	48021889
Breast_SE_4069_6	14	24147269	24167269	4.39369	1.52432	3.54571	2.81827	2.97637	2.77488	2.57378	2.82303	1.09403	2.15778	2.41434	2.2347	2.56037	2.4753	2.42161	2.08436			Breast_SE_151_3	1	48021889	48041889
Breast_SE_550_1	1	244297382	244317382	0	0	0	0	0	1.30965	0	2.08609	0	2.64421	0	1.67555	2.34291	0	2.39637	1.2929			Breast_SE_151_4	1	48041889	48061889
Breast_SE_5036_8	19	18967777	18987777	2.80627	0	0	0	1.5542	2.28009	0	2.48657	0	2.3949	2.34683	2.71483	1.72711	1.07948	2.69951	1.44827			Breast_SE_152_1	1	50950671	50970671
Breast_SE_4451_19	16	11199001	11219001	3.49599	0	0	0	0	0.708315	0	2.50247	0.386208	1.37078	1.07786	0.780489	2.01015	2.50061	2.02538	0			Breast_SE_152_2	1	50970671	50990671
Breast_SE_4056_12	13	113995721	114015721	2.12833	0	3.38129	0	0	1.93552	1.69831	1.72974	2.38311	0	1.36041	2.33679	2.41297	2.67812	2.20504	1.6909			Breast_SE_153_1	1	51250716	51270716
Breast_SE_5234_6	20	38117562	38137562	5.3567	0	0	0	2.14704	2.39101	2.32205	2.71913	1.29559	2.31683	2.52312	1.9722	2.91305	0	2.43621	0			Breast_SE_153_2	1	51270716	51290716
Breast_SE_649_17	2	43144894	43164894	5.16786	0	4.84803	4.2406	0	2.56174	2.41633	2.46466	2.00494	2.62316	2.33029	2.45834	2.58217	2.24887	2.72465	1.69581			Breast_SE_153_3	1	51290716	51310716
Breast_SE_1181_3	3	101934817	101954817	0	0	0	0	0	2.53961	0	1.72181	0	2.75147	1.65147	2.36958	2.84596	0	2.1377	1.03725			Breast_SE_153_4	1	51310716	51330716
Breast_SE_77_4	1	25782648	25802648	0.535258	0	0.597229	1.09038	0	1.80354	2.23586	2.01852	1.83027	0	1.63672	1.99004	1.20116	2.25457	1.84373	0.717148			Breast_SE_153_5	1	51330716	51350716
Breast_SE_4704_1	17	36916254	36936254	5.15278	0	3.5736	0	0	0	1.64116	2.11666	2.41815	2.91229	0	1.39615	2.22568	2.32728	2.36868	2.59289			Breast_SE_154_1	1	51531749	51551749
Breast_SE_5305_11	20	62399944	62419944	3.60454	0	2.9857	1.29725	0	1.73795	2.59372	2.12431	2.48557	0	1.90197	2.29194	2.25975	2.57756	2.66445	2.52474			Breast_SE_154_2	1	51551749	51571749
Breast_SE_4760_1	17	50012695	50032695	5.89726	0	0	0	1.64095	2.51229	0	2.73709	0	2.27803	1.79098	2.56879	2.88835	2.33517	2.08335	0			Breast_SE_154_3	1	51571749	51591749
Breast_SE_4616_5	17	2403208	2423208	3.29323	0	0	0	3.98512	1.56403	2.1698	2.56567	1.77488	0.946077	2.53302	2.10998	2.7953	2.3345	1.85246	0.950476			Breast_SE_154_4	1	51591749	51611749
Breast_SE_4361_4	15	75050049	75070049	0	0	0	0	0	0	1.13036	2.47236	0	2.57699	0	1.41219	1.9896	0	2.53124	1.21911			Breast_SE_154_5	1	51611749	51631749
Breast_SE_6_5	1	6252309	6272309	0	0	0.419099	0	0	0	2.24927	2.19838	2.50435	0	0	2.12393	1.80118	1.58016	1.61162	1.26062			Breast_SE_154_6	1	51631749	51651749
Breast_SE_932_7	2	218895215	218915215	5.17256	0	0	0	2.93439	1.49654	2.3326	2.0054	2.35477	2.14456	0	2.42713	1.34764	1.86435	2.69014	0			Breast_SE_154_7	1	51651749	51671749
Breast_SE_1846_5	5	150464759	150484759	6.32333	0	0	0	3.79369	2.68147	2.04948	2.56914	0.666831	1.93758	2.81444	2.85433	2.76668	2.2758	2.66023	0.139124			Breast_SE_155_1	1	51886929	51906929
Breast_SE_4760_11	17	50212695	50232695	3.9154	0	0	0	0	2.4951	0	2.75627	0	1.92027	2.83458	2.8338	2.57717	1.93094	1.58262	0			Breast_SE_155_2	1	51906929	51926929
Breast_SE_3079_8	9	129445459	129465459	5.61954	0	4.71198	2.79196	3.6134	2.99571	2.97058	2.43559	2.36057	1.8826	2.50735	2.96587	2.42725	2.76835	2.75666	2.31037			Breast_SE_155_3	1	51926929	51946929
Breast_SE_1400_11	4	7937214	7957214	5.06667	2.50542	3.63431	0	3.31559	2.66626	2.45703	2.6128	2.5726	2.46291	2.62819	2.6194	2.64446	2.82798	2.57475	1.24031			Breast_SE_156_1	1	52125298	52145298
Breast_SE_2934_3	9	37929606	37949606	7.14482	0	4.42312	0	1.62016	3.03489	2.19863	2.95325	0	2.7578	2.77329	2.78319	2.72115	2.70547	2.8329	1.29227			Breast_SE_157_1	1	52653010	52673010
Breast_SE_4167_1	14	72597686	72617686	1.1896	0	0	0	0.365326	2.90967	0	2.78632	0	2.24618	2.69658	2.12373	2.29024	2.19787	2.38186	0			Breast_SE_157_2	1	52673010	52693010
Breast_SE_4730_9	17	42418058	42438058	6.06385	0.587452	1.30911	3.31363	4.25211	2.92832	2.60569	2.81244	2.41852	2.16692	2.8565	2.75409	2.84622	2.79855	2.31631	1.08398			Breast_SE_157_3	1	52693010	52713010
Breast_SE_2534_3	7	157293826	157313826	4.64244	0	0	0	4.1703	2.6294	0	2.81555	1.88714	2.07679	2.5601	2.06819	3.07385	2.65388	2.41475	1.15672			Breast_SE_158_1	1	52897479	52917479
Breast_SE_5359_4	21	41649361	41669361	4.00901	0	1.43962	0	0	1.28784	2.17008	1.93746	1.86934	2.57479	2.80001	1.65222	1.83874	0	2.76642	0			Breast_SE_158_2	1	52917479	52937479
Breast_SE_4207_4	14	95497084	95517084	1.85607	0	0	0	0	2.1265	0	2.86176	0	0.644702	2.19831	2.34644	2.60614	1.40324	1.53057	1.02383			Breast_SE_158_3	1	52937479	52957479
Breast_SE_2262_2	7	6261134	6281134	3.11606	0	0	0	2.86183	0	2.35222	1.68511	2.50188	1.89224	2.35184	2.32794	2.14582	2.46766	2.43141	0			Breast_SE_158_4	1	52957479	52977479
Breast_SE_3110_15	9	136557069	136577069	3.82734	0	2.00246	2.49531	1.3311	0	2.94151	2.07906	2.41423	1.81351	2.43173	2.72549	2.98416	2.89224	2.81095	0.176609			Breast_SE_159_1	1	53036391	53056391
Breast_SE_705_4	2	67900385	67920385	2.27752	0	0	0	0	2.44749	1.15585	1.86581	0	1.34518	2.3808	1.82545	1.98396	1.77847	1.34127	0			Breast_SE_159_2	1	53056391	53076391
Breast_SE_212_1	1	89013380	89033380	4.42786	0	0	0	0	0	0	1.98345	0	2.55383	0	0.827573	2.30815	1.99129	2.43991	1.72683			Breast_SE_159_3	1	53076391	53096391
Breast_SE_30_4	1	14929445	14949445	4.37427	0	3.74036	0	0	1.86225	2.36456	0.845918	1.44327	2.61265	2.59328	2.28052	2.33587	2.44059	2.5429	0			Breast_SE_159_4	1	53096391	53116391
Breast_SE_2255_4	7	2264271	2284271	4.03748	0	0	0	0	1.65859	1.97937	1.94878	0	0	0	1.89963	2.00737	2.51425	2.46022	1.96784			Breast_SE_159_5	1	53116391	53136391
Breast_SE_3459_5	11	35616279	35636279	4.85121	0	1.79458	0	3.3039	2.88102	2.05926	0	2.7725	2.436	1.91239	2.60725	2.78735	2.68082	2.69754	1.7227			Breast_SE_159_6	1	53136391	53156391
Breast_SE_4230_2	14	104658980	104678980	5.51408	0	0	0	2.71755	0.798733	2.61982	2.71672	2.2433	0	2.34053	1.55708	2.83122	2.59748	2.81879	2.44567			Breast_SE_160_1	1	53261821	53281821
Breast_SE_5472_2	22	45686502	45706502	6.15329	0	0	0	3.45167	2.44666	2.29471	1.78561	1.26478	2.81269	2.35304	1.63631	2.33636	1.84237	2.57394	0			Breast_SE_160_2	1	53281821	53301821
Breast_SE_4426_3	15	99442309	99462309	3.07953	0	0	0	0	2.67446	0	2.51825	1.73666	1.41472	2.29826	1.9821	2.56003	0	2.20166	0			Breast_SE_160_3	1	53301821	53321821
Breast_SE_3502_10	11	63922048	63942048	4.78334	2.52357	2.80323	2.40907	3.87963	2.16057	2.67362	2.52814	2.10437	2.44237	2.07917	2.21977	2.16018	2.40575	2.70131	1.83869			Breast_SE_160_4	1	53321821	53341821
Breast_SE_5059_2	19	34980857	35000857	4.53533	0	1.78442	3.76561	3.15637	2.39515	2.43883	2.57	2.29814	1.17837	2.47508	2.50488	2.63846	2.42694	2.53997	1.55997			Breast_SE_161_1	1	53588432	53608432
Breast_SE_3463_1	11	37494629	37514629	0.149935	0	0	0	0	1.96257	0	1.96405	0	2.18557	0.888803	1.74636	2.0758	1.00155	1.01378	0			Breast_SE_161_2	1	53608432	53628432
Breast_SE_822_3	2	150158220	150178220	3.52508	0	1.04832	1.39214	0	1.4162	1.39124	2.19709	0	2.69564	1.62811	1.87519	2.37484	0	2.34223	0.950728			Breast_SE_161_3	1	53628432	53648432
Breast_SE_3770_4	12	52165785	52185785	5.20481	0	1.66731	3.39946	4.08548	3.01133	2.10342	2.50706	2.16815	1.95179	2.62088	2.62992	2.42496	2.45406	2.50567	1.48729			Breast_SE_161_4	1	53648432	53668432
Breast_SE_974_2	2	234253203	234273203	2.79907	0	0	0	0	2.30924	1.9287	2.50647	0	2.25546	2.34825	2.04123	2.43965	0	1.89376	0			Breast_SE_161_5	1	53668432	53688432
Breast_SE_530_17	1	234771791	234791791	2.86648	0	0	0	0.101575	2.44697	2.07457	2.30373	0	2.56319	2.02929	2.64447	1.66644	0	2.41442	0			Breast_SE_161_6	1	53688432	53708432
Breast_SE_5423_7	22	30272936	30292936	3.6396	3.44417	3.52588	0.937309	2.13165	1.78814	2.46205	2.92228	2.10253	2.10189	2.68634	2.76867	2.4084	2.31791	2.60197	2.31161			Breast_SE_162_1	1	53723802	53743802
Breast_SE_4654_5	17	15954582	15974582	4.67106	0	0.467679	0.297391	4.18987	2.80326	1.62586	2.85832	0	2.89205	2.53562	2.70804	3.00394	2.13421	2.66851	1.32033			Breast_SE_163_1	1	54210399	54230399
Breast_SE_3073_7	9	127596984	127616984	2.52168	1.88603	0	0	3.12478	1.97326	1.77103	2.33037	1.85982	1.48898	1.58465	1.60296	1.97101	2.455	2.13947	1.94818			Breast_SE_163_2	1	54230399	54250399
Breast_SE_2571_1	8	23278213	23298213	3.03155	0	0	0	0	2.79104	2.18129	2.17661	0	0	2.67981	2.16382	2.63771	2.18395	2.03161	1.3255			Breast_SE_163_3	1	54250399	54270399
Breast_SE_3025_3	9	110048599	110068599	4.01656	0	0	0	2.75206	2.67563	0	2.33177	1.72878	1.40901	1.93562	2.42904	2.87406	2.7072	2.07877	0			Breast_SE_163_4	1	54270399	54290399
Breast_SE_6_10	1	6352309	6372309	2.70538	0	0	3.93599	1.58412	0	2.05439	2.44737	2.33297	2.60684	0	2.45544	2.76918	2.07622	2.68834	1.35635			Breast_SE_163_5	1	54290399	54310399
Breast_SE_4760_8	17	50152695	50172695	4.68377	0	0	0	1.08662	2.52581	2.10276	2.26524	0	2.32626	2.4328	2.4581	1.63247	0	2.48884	1.94843			Breast_SE_163_6	1	54310399	54330399
Breast_SE_3390_8	11	2829685	2849685	0	0	0	0	0	0	0.897855	0.765087	1.84373	0	0	2.25679	2.07453	1.99962	2.25802	0.379655			Breast_SE_163_7	1	54330399	54350399
Breast_SE_2256_5	7	2823910	2843910	2.96156	0	2.45704	0	0.68479	1.23636	1.18298	1.97847	1.24569	0	1.94981	1.89705	2.42428	2.42503	1.98582	1.77025			Breast_SE_163_8	1	54350399	54370399
Breast_SE_4630_1	17	6441920	6461920	3.08423	0.552441	3.17828	2.20816	2.85973	2.52284	2.41558	2.33853	1.12979	1.43501	2.4704	2.19869	2.41626	2.48675	2.35009	1.7734			Breast_SE_163_9	1	54370399	54390399
Breast_SE_3789_9	12	57873803	57893803	2.8316	0	0	0	0.458672	2.4602	0.419351	2.14064	0	2.76961	2.58663	2.27618	2.48956	0	2.1528	1.90555			Breast_SE_163_10	1	54390399	54410399
Breast_SE_88_1	1	27955260	27975260	4.20395	3.17105	3.3982	2.74471	1.66792	1.99197	2.48804	2.6285	1.78017	2.01738	2.3971	2.50739	2.61669	2.68475	2.34355	2.18015			Breast_SE_163_11	1	54410399	54430399
Breast_SE_5272_60	20	50709659	50729659	3.72949	0	0	0	0.162706	2.4969	2.81147	2.12593	0	2.36786	1.3888	1.25511	1.7986	0	2.48025	1.83476			Breast_SE_164_1	1	54448575	54468575
Breast_SE_2353_21	7	47643368	47663368	4.08047	0	0	0	1.44097	2.55989	2.59114	2.90343	0	2.45596	2.74772	2.97253	2.73494	0	2.52502	0.482038			Breast_SE_164_2	1	54468575	54488575
Breast_SE_110_6	1	33314303	33334303	3.95793	0	0	0	0	1.64281	0	2.12163	0	2.24367	1.62639	1.54395	1.538	0	2.1345	1.30547			Breast_SE_164_3	1	54488575	54508575
Breast_SE_4231_29	14	105512931	105532931	0	0	0	0	0	1.99356	2.48987	2.03468	2.65405	0	1.86975	2.60842	0.773943	2.69145	1.28269	2.37464			Breast_SE_165_1	1	54839484	54859484
Breast_SE_1734_2	5	81839837	81859837	5.07814	0	3.39406	0	0	2.36514	2.3899	0	1.49063	2.15811	1.99099	2.19524	2.08038	2.06338	2.39555	2.34865			Breast_SE_165_2	1	54859484	54879484
Breast_SE_4001_1	13	51713804	51733804	3.66949	0	0	0	1.07361	1.40621	0	2.4883	0	2.56102	2.09671	2.1477	2.12302	1.09915	2.12774	0			Breast_SE_165_3	1	54879484	54899484
Breast_SE_4531_3	16	57759950	57779950	4.91302	0	0	0	2.99573	1.52777	2.55208	2.49862	1.97291	0	2.09661	1.98552	2.63286	2.50329	2.62798	0.661657			Breast_SE_166_1	1	55183757	55203757
Breast_SE_3502_18	11	64082048	64102048	6.23972	0	0	1.4856	2.69316	2.34168	2.85129	3.06614	2.04373	0	2.60402	2.63741	2.25553	2.80113	2.69959	0.95105			Breast_SE_166_2	1	55203757	55223757
Breast_SE_1357_2	3	195022110	195042110	0	0	0	0	0	0	1.49394	0	1.77449	2.46809	0	2.27474	2.42239	0	1.8986	0.782821			Breast_SE_166_3	1	55223757	55243757
Breast_SE_3129_7	10	4757124	4777124	2.50997	0	0	0	0	2.82961	0	2.35492	0	2.66059	2.27435	1.78881	2.91511	0.956083	2.0127	0			Breast_SE_166_4	1	55243757	55263757
Breast_SE_466_2	1	218329964	218349964	6.8991	0	0	4.2848	2.47517	2.46057	1.39471	2.88494	2.05305	2.74856	2.74092	2.79495	2.81627	2.62793	2.75227	0			Breast_SE_166_5	1	55263757	55283757
Breast_SE_4225_22	14	103259607	103279607	1.09912	0	1.59417	0.533624	0.367361	0	2.37385	1.73329	1.79113	2.35072	0	1.57715	0.695694	2.42914	2.35867	1.92867			Breast_SE_167_1	1	55413211	55433211
Breast_SE_4155_15	14	68202638	68222638	3.52126	0	0	0	0	0	1.67851	2.18004	0	2.88337	1.38056	1.90267	1.06125	0	2.05838	1.2963			Breast_SE_167_2	1	55433211	55453211
Breast_SE_5014_56	19	11177030	11197030	4.42681	0	1.90012	0.36192	3.68481	2.65324	2.49006	2.22086	2.06273	0.709031	2.24199	2.18134	2.51101	2.59476	2.6478	1.12176			Breast_SE_168_1	1	55681486	55701486
Breast_SE_4857_10	17	76521147	76541147	5.07615	0	1.85344	0	2.26114	0	2.82781	2.91487	2.3294	1.89095	2.65269	3.04176	2.78973	0	2.46683	1.91324			Breast_SE_168_2	1	55701486	55721486
Breast_SE_5018_6	19	13002862	13022862	7.05794	0	5.77399	0	0	3.14723	0.214081	2.91827	2.40292	1.98033	2.7342	2.73042	2.12239	2.99967	3.10747	2.4446			Breast_SE_168_3	1	55721486	55741486
Breast_SE_1593_7	4	184371476	184391476	3.1624	0	0	2.56016	1.03302	2.64162	0.767818	2.10509	0	2.57047	2.14516	2.21209	2.56878	1.82897	1.93915	1.03321			Breast_SE_169_1	1	56187095	56207095
Breast_SE_1153_2	3	69064570	69084570	3.42259	1.8442	1.85778	1.63836	3.08403	1.87275	2.00115	2.01853	1.90932	1.51974	1.67982	1.6879	2.39493	2.66339	2.4146	1.94682			Breast_SE_170_1	1	56357110	56377110
Breast_SE_3440_3	11	32086313	32106313	4.61294	2.72083	0	3.50234	3.52135	2.76225	2.54379	2.76003	2.4061	2.42883	2.69119	2.51139	2.711	2.64647	2.53472	1.84735			Breast_SE_170_2	1	56377110	56397110
Breast_SE_1057_6	3	30673025	30693025	2.86132	0	0	0	0	2.14862	2.24219	2.07208	0	2.22788	0	1.79509	2.51094	0	1.82329	0			Breast_SE_171_1	1	56481190	56501190
Breast_SE_4200_5	14	92522814	92542814	2.9942	0	0	0	0.340561	2.3299	0	2.3157	0	1.28463	2.42269	2.54311	1.92597	1.84422	2.39242	0			Breast_SE_171_2	1	56501190	56521190
Breast_SE_1400_13	4	7977214	7997214	2.43969	0	1.70695	0	3.52512	0	1.79432	2.13723	1.52987	2.3822	1.8747	1.94223	2.22856	2.13572	2.02422	1.09805			Breast_SE_171_3	1	56521190	56541190
Breast_SE_4717_1	17	40005196	40025196	3.56247	0	1.32374	0	0.118361	2.25756	1.96441	2.44851	0	0	1.82503	2.07169	2.54156	2.5203	2.0654	2.26403			Breast_SE_171_4	1	56541190	56561190
Breast_SE_3079_15	9	129585459	129605459	3.67427	0	0	0	0.323703	2.50646	3.00566	0	2.56276	0	1.96899	2.19162	2.55808	2.31251	2.67554	1.23596			Breast_SE_171_5	1	56561190	56581190
Breast_SE_3411_11	11	12216644	12236644	2.84226	0	1.34061	0	0	1.29267	2.06459	2.63109	0	2.74242	2.58531	1.44489	3.11699	0	2.29886	0.727397			Breast_SE_171_6	1	56581190	56601190
Breast_SE_538_4	1	235915655	235935655	3.28941	0	0	0	1.05227	2.74659	0	2.72242	0	2.94212	2.38136	2.68829	2.42905	0.690245	1.60796	2.1746			Breast_SE_172_1	1	57822526	57842526
Breast_SE_623_7	2	28661649	28681649	3.12895	0	0	0	0	0	0	1.12395	0	1.48568	2.20316	1.9975	1.47924	1.67316	2.17572	0.98235			Breast_SE_172_2	1	57842526	57862526
Breast_SE_5379_7	21	46295532	46315532	0.591496	0	0	0	0	1.36352	1.26406	1.32891	0	0	0	1.13516	1.91701	1.41948	1.78003	0.730231			Breast_SE_173_1	1	58565473	58585473
Breast_SE_3312_5	10	104324248	104344248	5.18533	2.01861	2.47384	0	5.24484	2.9283	2.64828	2.94406	2.46916	2.79037	2.89284	2.72871	3.05852	2.64559	2.6744	1.37665			Breast_SE_173_2	1	58585473	58605473
Breast_SE_622_6	2	28358557	28378557	2.80006	2.32092	0	0	0	0.99739	1.80361	2.60875	1.91873	2.15533	2.15605	2.37729	2.69688	0	1.40049	1.8982			Breast_SE_174_1	1	58670485	58690485
Breast_SE_2135_4	6	110538298	110558298	0	0	1.5998	0	0	2.15614	2.17103	1.95732	0	2.12024	0	2.5886	2.05623	0	2.17083	1.23084			Breast_SE_174_2	1	58690485	58710485
Breast_SE_2078_2	6	73694524	73714524	4.19286	0	0	0	4.78264	2.65322	1.57471	2.64845	2.49302	2.36876	2.35141	2.44348	2.22616	2.74229	2.69919	0			Breast_SE_174_3	1	58710485	58730485
Breast_SE_3853_14	12	95770374	95790374	4.43148	1.8771	0	0	1.26027	1.89358	2.69524	1.3177	2.32572	2.14166	2.59036	1.83337	2.56229	1.49362	2.54643	0			Breast_SE_174_4	1	58730485	58750485
Breast_SE_2995_1	9	94128399	94148399	5.24764	0	0.745797	0	2.10581	2.61102	0	2.34726	0	2.83709	2.24651	2.45784	2.15904	2.22556	1.90762	1.69906			Breast_SE_174_5	1	58750485	58770485
Breast_SE_498_6	1	226722689	226742689	3.31824	0	0	0	1.14741	0	2.55564	2.10288	1.88145	0	0	2.50079	1.71088	2.16864	2.29945	2.32411			Breast_SE_174_6	1	58770485	58790485
Breast_SE_4725_3	17	41490144	41510144	1.60129	0.160458	0.727226	0	0	1.14118	1.44054	2.151	2.0348	2.56398	2.18247	0	2.47849	0	2.52023	1.52227			Breast_SE_174_7	1	58790485	58810485
Breast_SE_3486_2	11	57417583	57437583	4.50569	0	0	0	0	2.69146	0	2.78681	0	2.68743	1.64147	2.40366	2.8643	0	2.71593	0			Breast_SE_174_8	1	58810485	58830485
Breast_SE_428_5	1	205301834	205321834	6.0624	0	0	1.16541	3.98609	2.59293	2.95723	2.63954	0	2.25256	2.48866	2.73972	2.417	2.64913	2.55978	2.42531			Breast_SE_174_9	1	58830485	58850485
Breast_SE_3758_1	12	49615058	49635058	2.29137	0	1.52808	0.978415	2.56081	1.08793	0.552727	2.54379	2.08808	1.60901	1.99998	1.57767	1.43518	2.13225	2.17352	2.01643			Breast_SE_174_10	1	58850485	58870485
Breast_SE_660_14	2	47035836	47055836	5.64658	0	0	2.65178	2.87553	2.51738	2.34307	2.79895	0	2.43612	2.55113	2.75073	2.88942	2.15346	2.12689	1.11237			Breast_SE_174_11	1	58870485	58890485
Breast_SE_973_1	2	234130148	234150148	1.00542	0	0	0	0	2.08451	2.68059	2.48635	0	1.7811	2.37077	2.64352	2.29278	0	1.91384	0			Breast_SE_174_12	1	58890485	58910485
Breast_SE_3502_24	11	64202048	64222048	3.49907	0	0	0.252948	1.25878	1.72868	2.22583	2.49622	0	0	1.2369	1.69371	2.61319	2.77142	2.35342	1.27929			Breast_SE_174_13	1	58910485	58930485
Breast_SE_3381_6	10	133284321	133304321	1.83731	0	0	0	0	0	0	2.51725	1.18412	0	0	1.21012	2.7591	1.53159	1.86691	1.21159			Breast_SE_174_14	1	58930485	58950485
Breast_SE_176_3	1	59136718	59156718	3.79639	0	0	0	3.38804	2.85465	2.67779	2.41821	1.2493	1.5688	2.58311	2.18166	2.82144	2.64403	1.72682	0			Breast_SE_175_1	1	58990005	59010005
Breast_SE_5329_2	21	33374012	33394012	4.05174	0	0	2.7523	2.75093	2.18036	0	2.44624	1.7152	2.72901	1.63832	2.6068	2.60551	1.90575	2.44445	0.487003			Breast_SE_175_2	1	59010005	59030005
Breast_SE_3078_11	9	129192384	129212384	0.86921	0	0	0.193693	1.96441	2.32281	2.4937	2.21652	2.11665	0	2.27891	2.51414	1.49371	1.12947	2.28928	1.34301			Breast_SE_175_3	1	59030005	59050005
Breast_SE_3100_2	9	133462085	133482085	4.05714	1.20144	0.889003	2.26357	0	2.57436	2.46975	2.68241	2.41178	0	2.16987	2.48073	2.41915	2.95759	2.06071	1.50305			Breast_SE_175_4	1	59050005	59070005
Breast_SE_5505_8	X	23874468	23894468	2.8842	0	1.02274	0	2.56917	1.97102	2.21814	1.93344	0	2.33854	2.5288	2.19378	2.34482	1.52403	2.05176	0.566894			Breast_SE_175_5	1	59070005	59090005
Breast_SE_649_7	2	42944894	42964894	3.29342	0	0	0	0	2.3536	2.9657	2.90386	0	2.38816	2.66171	2.74303	2.00927	0	2.25943	0			Breast_SE_176_1	1	59096718	59116718
Breast_SE_4918_11	18	26467223	26487223	6.2246	0	0	0	3.21941	2.77431	2.95482	2.3543	0	2.64749	1.06931	1.56077	2.48957	1.90637	2.42265	1.0745			Breast_SE_176_2	1	59116718	59136718
Breast_SE_4863_24	17	78919799	78939799	5.83986	0	0	0	4.39811	2.75076	2.48076	2.90993	2.4501	0.924887	2.74946	2.93003	2.93416	2.73565	2.51041	0			Breast_SE_176_3	1	59136718	59156718
Breast_SE_5486_1	X	9898225	9918225	2.39796	0	0	0	0	2.3682	0	2.46628	0.728912	2.67523	2.60434	1.73237	2.63213	0	2.06469	0			Breast_SE_176_4	1	59156718	59176718
Breast_SE_3918_15	12	123077615	123097615	4.64649	0	1.40549	2.33533	1.65619	1.92294	0.870615	2.64744	0	2.6943	0.429917	2.41556	2.38605	2.13393	2.30809	1.63472			Breast_SE_177_1	1	59664054	59684054
Breast_SE_1852_10	5	151732153	151752153	3.33008	0	0	0	2.20435	2.72015	1.66345	2.58176	0	1.42031	2.77445	2.99503	2.84794	2.21154	2.04045	0			Breast_SE_177_2	1	59684054	59704054
Breast_SE_4173_8	14	74601936	74621936	4.35621	0	0	0	3.12537	2.87512	2.13042	2.74905	1.71001	2.31904	2.88113	3.04083	2.77269	1.9877	0	1.28939			Breast_SE_177_3	1	59704054	59724054
Breast_SE_42_3	1	17522473	17542473	4.08635	0	2.84444	2.1008	0.867778	0.615699	0	2.74664	2.48617	2.50982	2.44672	2.39048	1.57439	2.65025	2.76836	1.51562			Breast_SE_177_4	1	59724054	59744054
Breast_SE_3081_3	9	129953476	129973476	2.91283	0	0	0	2.08958	0	0.48935	1.95895	0	2.0359	0.83559	1.56407	2.12662	1.20597	2.20538	1.23241			Breast_SE_177_5	1	59744054	59764054
Breast_SE_1797_2	5	135014680	135034680	6.73519	2.03849	5.10964	4.09992	2.2478	3.02418	2.74688	2.60579	2.7302	2.4519	2.64447	2.61222	2.82381	2.65192	2.91115	2.64399			Breast_SE_178_1	1	61035589	61055589
Breast_SE_3279_5	10	89275982	89295982	3.0101	0	0	0	0.988812	1.90718	0.942004	1.88224	0	2.90286	0	1.24957	2.77059	0.75356	2.20367	0			Breast_SE_178_2	1	61055589	61075589
Breast_SE_3066_3	9	124805652	124825652	3.70229	0	0	0	5.11495	2.65594	2.35122	2.03496	2.32711	2.74664	2.50323	2.61563	2.78632	2.74347	2.34712	0			Breast_SE_178_3	1	61075589	61095589
Breast_SE_4407_4	15	91941393	91961393	5.00196	0	0	0	4.09271	2.37205	2.02033	2.48054	1.77767	2.07476	0.355895	2.09036	2.28192	2.10108	2.46801	0			Breast_SE_178_4	1	61095589	61115589
Breast_SE_1847_4	5	150639218	150659218	6.49983	0	0	4.00241	4.25502	3.06432	2.4629	3.00255	1.48672	2.19702	2.85616	3.09324	2.68191	2.53631	2.71596	1.20483			Breast_SE_178_5	1	61115589	61135589
Breast_SE_4748_7	17	47297869	47317869	3.03995	0	0	0	0	0.966688	2.44907	1.611	0	2.39912	0	1.72246	2.19076	0	1.80438	0			Breast_SE_178_6	1	61135589	61155589
Breast_SE_5097_19	19	45373827	45393827	5.62307	0	0	0	3.70907	2.67978	2.28944	2.12054	0.375699	1.52274	2.77585	1.97798	2.60428	1.91147	2.5829	1.45039			Breast_SE_178_7	1	61155589	61175589
Breast_SE_3684_4	12	12831808	12851808	4.37016	0	0	0	4.45652	2.05057	2.28578	2.70593	1.89716	2.51901	1.89132	1.63625	2.72153	1.67392	2.39186	0			Breast_SE_178_8	1	61175589	61195589
Breast_SE_1710_4	5	68429830	68449830	2.38663	0	0	0	0	0	0	1.8821	0	2.80022	1.30245	1.61154	2.22763	0	2.53459	1.65709			Breast_SE_178_9	1	61195589	61215589
Breast_SE_3110_17	9	136597069	136617069	1.17293	0	0	0	0	0	2.49251	0	2.69274	0	2.18666	2.58746	2.5387	2.67406	2.48203	1.52221			Breast_SE_178_10	1	61215589	61235589
Breast_SE_5109_7	19	48645093	48665093	0	0	0	0	2.60601	1.42533	2.35267	2.20141	2.22914	0	1.97252	1.71972	2.2267	2.21695	2.23247	0.648598			Breast_SE_179_1	1	61416853	61436853
Breast_SE_4117_6	14	51377484	51397484	5.02333	0	0	0	0	2.67933	0	2.16862	0	2.9217	2.33445	2.39369	2.89436	1.19136	1.05269	0			Breast_SE_179_2	1	61436853	61456853
Breast_SE_660_4	2	46835836	46855836	6.68872	0	0	0	2.20505	2.84718	0	3.04992	0	3.03433	2.90343	2.94836	2.51323	2.47032	2.70151	0			Breast_SE_179_3	1	61456853	61476853
Breast_SE_4438_13	16	3181958	3201958	2.73225	0	0	0.776506	0.0699673	1.79289	2.22465	2.65993	2.22386	0.662258	0	2.2305	0	2.10272	2.05033	2.24221			Breast_SE_180_1	1	61722745	61742745
Breast_SE_2521_6	7	151033568	151053568	3.00517	0	0	0	0	0	1.82265	2.88743	0	0	2.6346	2.68735	2.04692	2.0234	1.99379	1.3837			Breast_SE_180_2	1	61742745	61762745
Breast_SE_1402_1	4	8523544	8543544	4.11256	0	2.80394	0	0	0	2.43717	2.2356	0	2.52954	0.395372	1.17961	2.53623	2.6272	2.45289	1.84247			Breast_SE_181_1	1	62266869	62286869
Breast_SE_1692_3	5	57807028	57827028	4.28548	0	0	0	1.02582	2.75841	2.39018	1.66217	0	2.72012	1.99564	1.84401	2.42305	0	2.19873	0.674912			Breast_SE_181_2	1	62286869	62306869
Breast_SE_1380_1	4	2030475	2050475	0	0	0	0	0	2.0057	1.92582	0.836831	1.38899	0	1.84702	1.70418	1.16363	2.92185	1.74106	1.02423			Breast_SE_181_3	1	62306869	62326869
Breast_SE_3381_4	10	133244321	133264321	5.19425	2.7787	2.63719	2.30284	3.4203	2.7643	2.46508	2.75039	2.81628	1.57755	2.05138	2.5352	2.99471	2.89362	2.43155	2.13282			Breast_SE_181_4	1	62326869	62346869
Breast_SE_5059_1	19	34960857	34980857	0	0	0	0	0	0	1.97069	1.31069	0	0	0	2.40546	2.67151	1.62752	1.81995	0.913392			Breast_SE_182_1	1	62418257	62438257
Breast_SE_2824_10	8	127734354	127754354	6.33714	0	0	6.0773	3.98754	3.06933	2.70438	3.08715	2.54135	2.75991	3.02185	3.02552	3.01432	2.74402	2.48589	2.43831			Breast_SE_182_2	1	62438257	62458257
Breast_SE_5375_10	21	45004996	45024996	4.64301	0	0	0	1.20132	1.62116	0	2.35414	2.55792	0	2.66925	2.57293	2.50094	2.59811	2.35047	0			Breast_SE_183_1	1	63640104	63660104
Breast_SE_1462_5	4	73719585	73739585	1.78292	0	0	0	0	2.85008	0	2.50097	0	2.8453	2.14689	1.69519	2.26635	1.94016	1.13708	0			Breast_SE_183_2	1	63660104	63680104
Breast_SE_4863_29	17	79019799	79039799	6.06092	0	0	3.62967	2.72824	1.44249	0	2.99146	1.71399	2.46407	2.35662	2.7433	2.64364	2.72946	2.78171	0.871157			Breast_SE_184_1	1	64031221	64051221
Breast_SE_4118_7	14	51548325	51568325	4.48948	0	0.286103	0	0.0687554	1.79552	0	1.86935	0	2.79608	2.36879	2.39017	2.7537	0	1.60844	2.10448			Breast_SE_185_1	1	64467382	64487382
Breast_SE_732_3	2	75592971	75612971	4.24655	0	1.18824	0	0	2.85878	2.74017	2.43978	0	2.66638	2.67695	2.77578	0.13765	1.55378	2.64841	1.97664			Breast_SE_185_2	1	64487382	64507382
Breast_SE_649_12	2	43044894	43064894	3.44711	0	0	0	0	1.7523	2.43577	2.08511	0	1.00551	1.93275	2.61507	1.93798	0	2.40646	0			Breast_SE_185_3	1	64507382	64527382
Breast_SE_4842_14	17	72591754	72611754	0.842404	0	0	1.30545	0	0.756113	2.25059	2.3548	0	2.70094	2.26078	2.48281	2.41742	0	2.42365	0			Breast_SE_185_4	1	64527382	64547382
Breast_SE_25_3	1	11924764	11944764	4.54466	2.4685	3.09243	4.13915	3.57351	2.7567	2.65982	2.88254	2.33517	2.22857	2.66532	2.64605	2.5002	2.62433	2.57743	2.1166			Breast_SE_185_5	1	64547382	64567382
Breast_SE_2662_1	8	60905531	60925531	0	0	0	0	0	0	0	0.933545	1.29984	2.34	0	1.52205	2.06961	0	2.39292	2.24549			Breast_SE_186_1	1	64818870	64838870
Breast_SE_2844_3	8	142692406	142712406	4.73916	0	0	0	3.67801	3.00174	0	2.89964	2.67183	2.40034	2.90465	2.64919	2.41712	2.339	2.24953	0			Breast_SE_186_2	1	64838870	64858870
Breast_SE_2024_3	6	41715582	41735582	4.96476	3.43076	0	0	1.49193	1.27073	1.36739	2.84153	2.77533	0.97158	2.06008	2.66982	2.40624	2.56929	2.71641	1.89312			Breast_SE_186_3	1	64858870	64878870
Breast_SE_3449_4	11	34190577	34210577	2.47758	0	0	0	0.210466	2.34635	1.33953	2.17232	0	0	1.35137	1.00637	2.52448	2.2639	2.41	0.630526			Breast_SE_186_4	1	64878870	64898870
Breast_SE_2931_3	9	36281165	36301165	1.96924	0	0	0	0	0	2.27018	1.90961	0	2.64543	0	1.65576	1.41641	0	2.74811	1.7653			Breast_SE_186_5	1	64898870	64918870
Breast_SE_1367_3	3	197307857	197327857	4.94049	0	0	0	1.23989	0	2.00301	1.7544	0	2.55404	2.19423	1.99988	2.53304	1.8664	1.17566	0			Breast_SE_186_6	1	64918870	64938870
Breast_SE_4357_4	15	74423408	74443408	6.44539	0	0	0	1.25279	0	1.57886	2.67609	2.36909	0	2.5204	1.90147	2.47248	1.72736	2.52994	0			Breast_SE_186_7	1	64938870	64958870
Breast_SE_5021_6	19	15091368	15111368	2.00721	0	0	2.13482	3.32193	2.77754	2.63241	2.68428	2.32254	0	2.55125	2.53952	2.60484	2.91714	2.68335	1.79934			Breast_SE_186_8	1	64958870	64978870
Breast_SE_4748_6	17	47277869	47297869	4.39169	0	0	0	0	0	2.6705	2.47758	0	2.52079	2.14567	2.06505	2.40302	0	1.93999	0			Breast_SE_186_9	1	64978870	64998870
Breast_SE_3429_7	11	20017291	20037291	3.61195	0	0	0	0	1.15249	2.27659	1.7359	0	2.5914	1.69089	2.11395	1.11399	0	2.09282	0			Breast_SE_186_10	1	64998870	65018870
Breast_SE_4581_6	16	81486565	81506565	3.6244	0	0	1.21644	3.98102	0	2.31374	2.26091	2.34466	1.90508	2.5444	1.67735	2.66475	2.19982	2.58998	1.23876			Breast_SE_186_11	1	65018870	65038870
Breast_SE_5375_5	21	44904996	44924996	4.37119	0	2.26419	0	0.554214	0	1.54542	0	2.53156	2.33423	0	2.40262	2.82012	1.11163	2.97464	1.32705			Breast_SE_186_12	1	65038870	65058870
Breast_SE_56_7	1	21332925	21352925	4.94882	3.49055	4.72542	3.45822	2.50167	2.48	2.30934	2.9503	2.25755	2.81631	2.78052	2.68849	2.73092	2.5409	2.75722	2.38852			Breast_SE_186_13	1	65058870	65078870
Breast_SE_4202_3	14	93953980	93973980	1.58965	0	0	2.03061	0	1.49698	0	2.52895	0	2.16382	0	1.98454	2.88891	2.03106	2.32177	0			Breast_SE_187_1	1	65404170	65424170
Breast_SE_5473_4	22	45908627	45928627	5.61165	0	5.46524	0	0.456416	0	2.16414	2.53353	2.62486	2.32394	2.70813	1.63506	2.48428	2.16137	2.99657	2.37885			Breast_SE_187_2	1	65424170	65444170
Breast_SE_1690_3	5	57428494	57448494	0	0	0	0	0	0	1.76787	2.42645	0	2.23972	2.68464	2.13557	2.53623	0	2.15694	0			Breast_SE_188_1	1	66226373	66246373
Breast_SE_1995_8	6	33675259	33695259	3.84446	0	0	0	0.0449955	0	1.56858	2.88337	0	0	2.76807	1.96898	2.6095	2.38602	2.00161	1.30253			Breast_SE_188_2	1	66246373	66266373
Breast_SE_4364_3	15	76184396	76204396	5.28321	0	4.33787	0	1.25008	0	1.96314	2.15602	1.33017	2.67009	2.2111	2.17923	2.38878	1.32646	1.95468	1.81943			Breast_SE_188_3	1	66266373	66286373
Breast_SE_5443_1	22	39036850	39056850	2.76209	0	0	0	1.51728	0	2.28059	2.26342	2.15153	0	1.98288	2.1063	1.99354	2.20596	2.47793	0			Breast_SE_188_4	1	66286373	66306373
Breast_SE_938_5	2	219429095	219449095	5.36679	0	0	0	0	2.51132	1.51755	2.61585	2.29748	0	2.68147	2.27615	0.127369	2.6496	2.44957	1.03647			Breast_SE_188_5	1	66306373	66326373
Breast_SE_3428_7	11	19707385	19727385	4.68394	0	0	0.243661	2.13149	2.83741	0	2.81523	0	2.63341	2.6707	2.55456	2.92078	2.80302	2.27803	0			Breast_SE_188_6	1	66326373	66346373
Breast_SE_788_3	2	119209936	119229936	0.492277	0	1.85017	2.61978	0	2.10951	1.67767	2.21848	2.0489	0	2.41189	1.90372	2.31917	2.53434	2.40216	2.21567			Breast_SE_188_7	1	66346373	66366373
Breast_SE_1357_13	3	195242110	195262110	4.6623	0	0	2.91563	0	2.61162	2.81262	2.29249	1.41086	0	2.79558	2.75876	2.7004	2.10711	1.77787	1.04383			Breast_SE_188_8	1	66366373	66386373
Breast_SE_4603_1	16	88220362	88240362	4.68042	0	2.71455	2.63054	1.6822	2.72123	0	2.76239	2.26204	2.36836	2.71905	2.20255	2.64608	1.87554	2.90152	0.803448			Breast_SE_188_9	1	66386373	66406373
Breast_SE_1386_3	4	2808675	2828675	3.84429	0	2.53193	0	0	1.80706	2.49489	1.97398	0	0	1.39272	2.48954	2.6419	2.73492	2.54206	1.77531			Breast_SE_189_1	1	66529011	66549011
Breast_SE_5371_10	21	43748974	43768974	4.76411	0	0	3.00259	4.40793	2.87704	2.97844	2.51806	2.45211	1.15454	1.79748	2.38893	2.49235	2.93918	3.06315	1.39024			Breast_SE_189_2	1	66549011	66569011
Breast_SE_1109_7	3	52048126	52068126	4.37834	3.73978	3.56654	3.31542	2.46092	2.81021	2.58653	2.85025	2.64086	2.3319	2.81208	2.50216	2.97514	2.72715	2.51564	2.28931			Breast_SE_189_3	1	66569011	66589011
Breast_SE_4728_1	17	41952954	41972954	5.40151	3.05689	4.32876	3.25525	2.80253	2.59363	2.63886	2.5379	2.47449	2.48009	2.32066	2.53261	2.44588	2.62296	2.70346	2.03866			Breast_SE_190_1	1	66908330	66928330
Breast_SE_5493_3	X	13364088	13384088	2.01565	0	0.827393	0	0	2.07407	0	2.24748	0	2.51435	2.29838	1.68357	1.80815	1.68255	1.5795	0			Breast_SE_190_2	1	66928330	66948330
Breast_SE_983_2	2	237875109	237895109	4.07125	0	0	0	0	2.80894	0	2.0114	1.165	0	2.27919	2.5143	1.93232	2.74716	2.26256	0			Breast_SE_190_3	1	66948330	66968330
Breast_SE_5263_2	20	47779108	47799108	5.03886	0	0	0	0	1.99346	0	2.88837	0	2.83237	0	2.92703	0	2.08136	2.59925	0.897758			Breast_SE_190_4	1	66968330	66988330
Breast_SE_1990_2	6	32830510	32850510	5.83259	0.605722	3.60998	3.59338	1.50254	2.46985	1.86138	2.80572	1.26996	1.70478	2.56032	2.65416	2.63072	2.11994	2.41359	1.2455			Breast_SE_191_1	1	67602473	67622473
Breast_SE_2477_6	7	130334008	130354008	2.00504	0	0	0	0.584264	1.04709	2.46183	2.69997	0	1.51543	1.69933	2.79038	1.64061	0	2.1597	0			Breast_SE_191_2	1	67622473	67642473
Breast_SE_95_3	1	29704657	29724657	2.91509	0	0	0	0	0	0	2.92313	1.83118	1.9642	2.48386	2.19892	2.79679	1.71586	0	0			Breast_SE_191_3	1	67642473	67662473
Breast_SE_2463_1	7	116663701	116683701	4.48307	0	0	4.0422	1.90491	2.55185	2.25801	2.29343	2.14648	2.53132	2.34744	1.72974	2.65803	2.32666	2.29565	0			Breast_SE_191_4	1	67662473	67682473
Breast_SE_4613_12	17	1764136	1784136	1.61337	0.525375	2.69225	0.527834	0.359887	2.55906	1.37407	2.33943	1.01123	2.46241	2.04806	2.53466	1.74493	0	1.89646	1.85344			Breast_SE_191_5	1	67682473	67702473
Breast_SE_1188_1	3	107514228	107534228	4.52892	0	4.59621	3.44492	3.16007	2.47081	2.63811	2.53326	2.71298	1.85935	2.56359	2.49698	2.65469	2.77793	2.38295	1.91351			Breast_SE_191_6	1	67702473	67722473
Breast_SE_3059_2	9	121557147	121577147	1.50791	0	0	0	0	0	0	1.63865	0	2.02359	0.869949	1.55428	1.70175	0	2.25286	1.79304			Breast_SE_191_7	1	67722473	67742473
Breast_SE_983_1	2	237855109	237875109	5.24556	0	0	0	0.93092	2.97859	0	2.27382	1.69738	0	2.68739	2.64666	2.78814	2.9427	2.21091	0			Breast_SE_191_8	1	67742473	67762473
Breast_SE_5308_3	20	63556587	63576587	2.10742	1.9408	0	2.77071	0	2.76365	2.42507	2.81696	2.7355	0	2.36728	2.5636	2.48191	2.7442	2.72571	1.69354			Breast_SE_191_9	1	67762473	67782473
Breast_SE_637_4	2	37784737	37804737	3.85249	0	0	0	0	2.62409	0	2.04977	0	2.87712	2.56329	2.29446	2.21061	0	2.15667	0.761527			Breast_SE_191_10	1	67782473	67802473
Breast_SE_873_3	2	187517117	187537117	2.71447	0	1.188	0	0	0.498321	1.91199	2.0948	0	2.87725	1.18565	1.38264	1.35753	0	2.21348	1.65132			Breast_SE_191_11	1	67802473	67822473
Breast_SE_3279_6	10	89295982	89315982	2.18649	0	0	0.779216	0	1.13557	0	2.25951	0	2.34963	0	1.115	2.34321	0.863727	1.94443	0			Breast_SE_191_12	1	67822473	67842473
Breast_SE_5109_8	19	48665093	48685093	0	0	0.985374	0	0	0	2.26564	1.39956	2.25033	2.22325	0	1.25781	1.23883	0	2.28786	1.11918			Breast_SE_191_13	1	67842473	67862473
Breast_SE_5218_1	20	35429976	35449976	1.66807	0	0	0	0	2.43732	1.41368	2.05299	0	0	2.19535	2.08998	1.96595	2.03553	1.22826	1.15291			Breast_SE_192_1	1	68173081	68193081
Breast_SE_4490_6	16	29821206	29841206	3.57945	0	0	1.67064	3.70931	2.56088	1.64837	2.74541	0	2.23235	2.61448	2.14995	2.89436	2.29973	2.36617	1.76963			Breast_SE_192_2	1	68193081	68213081
Breast_SE_952_2	2	226658502	226678502	2.82113	0	0	0	0	0	0.246061	2.45753	0	2.07776	0	1.73884	2.41329	0	2.09379	0			Breast_SE_192_3	1	68213081	68233081
Breast_SE_5412_2	22	26552933	26572933	3.10885	0	0	0	0	0	0	1.79248	0	2.68657	1.96169	1.57359	2.23582	0	2.27212	1.08101			Breast_SE_193_1	1	68365622	68385622
Breast_SE_1321_1	3	183242717	183262717	4.36096	0	0	0	2.72237	2.35149	0	2.41131	2.75071	1.74135	0	2.02842	2.4882	2.53455	1.83297	0			Breast_SE_193_2	1	68385622	68405622
Breast_SE_1509_2	4	107704583	107724583	2.80349	2.98343	3.08534	1.10207	1.41563	1.89633	2.11092	2.38367	1.57027	1.68528	1.81488	2.35567	2.15608	2.23055	2.09265	2.22877			Breast_SE_194_1	1	72271654	72291654
Breast_SE_4368_2	15	77489390	77509390	5.08931	0	1.81021	0	1.52594	2.38518	1.508	2.8145	0	2.76577	2.40881	2.83011	2.12735	0	2.54254	2.18616			Breast_SE_195_1	1	75127680	75147680
Breast_SE_4630_2	17	6461920	6481920	1.17431	0	0	0	0	1.10665	1.76508	2.1019	0	0	0	0.889492	1.69208	1.98653	2.09202	0.900698			Breast_SE_196_1	1	76855634	76875634
Breast_SE_5462_10	22	42667322	42687322	0.600701	0	0	0	2.20435	2.81138	2.22919	2.88871	0	1.57564	2.03452	2.34356	2.02895	1.45574	2.09731	0			Breast_SE_196_2	1	76875634	76895634
Breast_SE_1995_16	6	33835259	33855259	4.72266	0	0	3.78748	2.99422	2.23967	0	2.78379	2.14265	2.69012	2.4262	2.53075	2.00756	2.5227	2.73384	1.8691			Breast_SE_196_3	1	76895634	76915634
Breast_SE_3007_14	9	98228501	98248501	4.45429	0	0	0.906619	1.69092	2.66107	0	1.55875	0	2.40416	1.56359	1.62305	2.52259	1.68398	2.46424	2.11795			Breast_SE_197_1	1	76985142	77005142
Breast_SE_5492_3	X	13272701	13292701	2.76582	0	0	0	0	0.312904	0	1.4769	1.80364	2.21721	1.43551	0	2.03906	2.31612	1.72655	0			Breast_SE_197_2	1	77005142	77025142
																						Breast_SE_197_3	1	77025142	77045142
				sensitive					insensitive													Breast_SE_198_1	1	77488019	77508019
		mean(best anticorrelates)		5.55111	5.68401	5.82762	5.43696	5.2654	2.73219	2.69854	2.70503	2.10777	2.32003	2.63266	2.54437	2.70769	2.48946	2.5322	2.47535			Breast_SE_198_2	1	77508019	77528019
		mean(positive correlates)		3.84165	0.240838	0.984815	0.765775	1.59109	1.92308	1.78442	2.41746	1.54513	1.89325	2.08509	2.27922	2.37603	1.97057	2.38824	1.23426			Breast_SE_198_3	1	77528019	77548019
																						Breast_SE_199_1	1	77672942	77692942
																						Breast_SE_200_1	1	77854766	77874766
																						Breast_SE_200_2	1	77874766	77894766
																						Breast_SE_201_1	1	77966173	77986173
																						Breast_SE_202_1	1	80361497	80381497
																						Breast_SE_202_2	1	80381497	80401497
																						Breast_SE_202_3	1	80401497	80421497
																						Breast_SE_203_1	1	80433508	80453508
																						Breast_SE_203_2	1	80453508	80473508
																						Breast_SE_203_3	1	80473508	80493508
																						Breast_SE_203_4	1	80493508	80513508
																						Breast_SE_203_5	1	80513508	80533508
																						Breast_SE_203_6	1	80533508	80553508
																						Breast_SE_203_7	1	80553508	80573508
																						Breast_SE_203_8	1	80573508	80593508
																						Breast_SE_203_9	1	80593508	80613508
																						Breast_SE_203_10	1	80613508	80633508
																						Breast_SE_203_11	1	80633508	80653508
																						Breast_SE_203_12	1	80653508	80673508
																						Breast_SE_203_13	1	80673508	80693508
																						Breast_SE_204_1	1	81783444	81803444
																						Breast_SE_204_2	1	81803444	81823444
																						Breast_SE_204_3	1	81823444	81843444
																						Breast_SE_205_1	1	85184903	85204903
																						Breast_SE_205_2	1	85204903	85224903
																						Breast_SE_205_3	1	85224903	85244903
																						Breast_SE_205_4	1	85244903	85264903
																						Breast_SE_206_1	1	85256782	85276782
																						Breast_SE_206_2	1	85276782	85296782
																						Breast_SE_206_3	1	85296782	85316782
																						Breast_SE_206_4	1	85316782	85336782
																						Breast_SE_206_5	1	85336782	85356782
																						Breast_SE_206_6	1	85356782	85376782
																						Breast_SE_207_1	1	85416647	85436647
																						Breast_SE_207_2	1	85436647	85456647
																						Breast_SE_207_3	1	85456647	85476647
																						Breast_SE_208_1	1	85513890	85533890
																						Breast_SE_208_2	1	85533890	85553890
																						Breast_SE_208_3	1	85553890	85573890
																						Breast_SE_208_4	1	85573890	85593890
																						Breast_SE_208_5	1	85593890	85613890
																						Breast_SE_208_6	1	85613890	85633890
																						Breast_SE_208_7	1	85633890	85653890
																						Breast_SE_208_8	1	85653890	85673890
																						Breast_SE_208_9	1	85673890	85693890
																						Breast_SE_208_10	1	85693890	85713890
																						Breast_SE_209_1	1	86698848	86718848
																						Breast_SE_210_1	1	87317491	87337491
																						Breast_SE_210_2	1	87337491	87357491
																						Breast_SE_211_1	1	87773116	87793116
																						Breast_SE_211_2	1	87793116	87813116
																						Breast_SE_211_3	1	87813116	87833116
																						Breast_SE_211_4	1	87833116	87853116
																						Breast_SE_211_5	1	87853116	87873116
																						Breast_SE_212_1	1	89013380	89033380
																						Breast_SE_212_2	1	89033380	89053380
																						Breast_SE_212_3	1	89053380	89073380
																						Breast_SE_213_1	1	89620665	89640665
																						Breast_SE_213_2	1	89640665	89660665
																						Breast_SE_213_3	1	89660665	89680665
																						Breast_SE_214_1	1	89686455	89706455
																						Breast_SE_214_2	1	89706455	89726455
																						Breast_SE_214_3	1	89726455	89746455
																						Breast_SE_214_4	1	89746455	89766455
																						Breast_SE_215_1	1	89806595	89826595
																						Breast_SE_215_2	1	89826595	89846595
																						Breast_SE_216_1	1	89879583	89899583
																						Breast_SE_216_2	1	89899583	89919583
																						Breast_SE_216_3	1	89919583	89939583
																						Breast_SE_216_4	1	89939583	89959583
																						Breast_SE_217_1	1	91009754	91029754
																						Breast_SE_218_1	1	91520436	91540436
																						Breast_SE_218_2	1	91540436	91560436
																						Breast_SE_218_3	1	91560436	91580436
																						Breast_SE_219_1	1	91575128	91595128
																						Breast_SE_219_2	1	91595128	91615128
																						Breast_SE_219_3	1	91615128	91635128
																						Breast_SE_219_4	1	91635128	91655128
																						Breast_SE_220_1	1	91666552	91686552
																						Breast_SE_220_2	1	91686552	91706552
																						Breast_SE_220_3	1	91706552	91726552
																						Breast_SE_220_4	1	91726552	91746552
																						Breast_SE_220_5	1	91746552	91766552
																						Breast_SE_220_6	1	91766552	91786552
																						Breast_SE_220_7	1	91786552	91806552
																						Breast_SE_220_8	1	91806552	91826552
																						Breast_SE_220_9	1	91826552	91846552
																						Breast_SE_220_10	1	91846552	91866552
																						Breast_SE_220_11	1	91866552	91886552
																						Breast_SE_220_12	1	91886552	91906552
																						Breast_SE_221_1	1	92767075	92787075
																						Breast_SE_221_2	1	92787075	92807075
																						Breast_SE_221_3	1	92807075	92827075
																						Breast_SE_221_4	1	92827075	92847075
																						Breast_SE_222_1	1	93550646	93570646
																						Breast_SE_222_2	1	93570646	93590646
																						Breast_SE_222_3	1	93590646	93610646
																						Breast_SE_222_4	1	93610646	93630646
																						Breast_SE_222_5	1	93630646	93650646
																						Breast_SE_222_6	1	93650646	93670646
																						Breast_SE_222_7	1	93670646	93690646
																						Breast_SE_222_8	1	93690646	93710646
																						Breast_SE_222_9	1	93710646	93730646
																						Breast_SE_222_10	1	93730646	93750646
																						Breast_SE_222_11	1	93750646	93770646
																						Breast_SE_222_12	1	93770646	93790646
																						Breast_SE_222_13	1	93790646	93810646
																						Breast_SE_222_14	1	93810646	93830646
																						Breast_SE_222_15	1	93830646	93850646
																						Breast_SE_223_1	1	93956331	93976331
																						Breast_SE_223_2	1	93976331	93996331
																						Breast_SE_223_3	1	93996331	94016331
																						Breast_SE_223_4	1	94016331	94036331
																						Breast_SE_223_5	1	94036331	94056331
																						Breast_SE_223_6	1	94056331	94076331
																						Breast_SE_223_7	1	94076331	94096331
																						Breast_SE_223_8	1	94096331	94116331
																						Breast_SE_223_9	1	94116331	94136331
																						Breast_SE_223_10	1	94136331	94156331
																						Breast_SE_224_1	1	94162758	94182758
																						Breast_SE_224_2	1	94182758	94202758
																						Breast_SE_224_3	1	94202758	94222758
																						Breast_SE_224_4	1	94222758	94242758
																						Breast_SE_224_5	1	94242758	94262758
																						Breast_SE_224_6	1	94262758	94282758
																						Breast_SE_224_7	1	94282758	94302758
																						Breast_SE_224_8	1	94302758	94322758
																						Breast_SE_224_9	1	94322758	94342758
																						Breast_SE_225_1	1	94504704	94524704
																						Breast_SE_225_2	1	94524704	94544704
																						Breast_SE_225_3	1	94544704	94564704
																						Breast_SE_225_4	1	94564704	94584704
																						Breast_SE_225_5	1	94584704	94604704
																						Breast_SE_225_6	1	94604704	94624704
																						Breast_SE_225_7	1	94624704	94644704
																						Breast_SE_225_8	1	94644704	94664704
																						Breast_SE_225_9	1	94664704	94684704
																						Breast_SE_225_10	1	94684704	94704704
																						Breast_SE_225_11	1	94704704	94724704
																						Breast_SE_225_12	1	94724704	94744704
																						Breast_SE_225_13	1	94744704	94764704
																						Breast_SE_226_1	1	94811697	94831697
																						Breast_SE_226_2	1	94831697	94851697
																						Breast_SE_226_3	1	94851697	94871697
																						Breast_SE_226_4	1	94871697	94891697
																						Breast_SE_226_5	1	94891697	94911697
																						Breast_SE_226_6	1	94911697	94931697
																						Breast_SE_226_7	1	94931697	94951697
																						Breast_SE_226_8	1	94951697	94971697
																						Breast_SE_226_9	1	94971697	94991697
																						Breast_SE_226_10	1	94991697	95011697
																						Breast_SE_226_11	1	95011697	95031697
																						Breast_SE_226_12	1	95031697	95051697
																						Breast_SE_227_1	1	96353365	96373365
																						Breast_SE_227_2	1	96373365	96393365
																						Breast_SE_228_1	1	97883130	97903130
																						Breast_SE_228_2	1	97903130	97923130
																						Breast_SE_229_1	1	97994595	98014595
																						Breast_SE_229_2	1	98014595	98034595
																						Breast_SE_229_3	1	98034595	98054595
																						Breast_SE_229_4	1	98054595	98074595
																						Breast_SE_229_5	1	98074595	98094595
																						Breast_SE_229_6	1	98094595	98114595
																						Breast_SE_230_1	1	98154081	98174081
																						Breast_SE_230_2	1	98174081	98194081
																						Breast_SE_230_3	1	98194081	98214081
																						Breast_SE_230_4	1	98214081	98234081
																						Breast_SE_231_1	1	98230859	98250859
																						Breast_SE_231_2	1	98250859	98270859
																						Breast_SE_231_3	1	98270859	98290859
																						Breast_SE_231_4	1	98290859	98310859
																						Breast_SE_231_5	1	98310859	98330859
																						Breast_SE_231_6	1	98330859	98350859
																						Breast_SE_231_7	1	98350859	98370859
																						Breast_SE_231_8	1	98370859	98390859
																						Breast_SE_231_9	1	98390859	98410859
																						Breast_SE_231_10	1	98410859	98430859
																						Breast_SE_231_11	1	98430859	98450859
																						Breast_SE_231_12	1	98450859	98470859
																						Breast_SE_231_13	1	98470859	98490859
																						Breast_SE_232_1	1	99630532	99650532
																						Breast_SE_232_2	1	99650532	99670532
																						Breast_SE_232_3	1	99670532	99690532
																						Breast_SE_232_4	1	99690532	99710532
																						Breast_SE_233_1	1	100034027	100054027
																						Breast_SE_234_1	1	100589401	100609401
																						Breast_SE_234_2	1	100609401	100629401
																						Breast_SE_234_3	1	100629401	100649401
																						Breast_SE_235_1	1	107047114	107067114
																						Breast_SE_236_1	1	107047128	107067128
																						Breast_SE_237_1	1	107520476	107540476
																						Breast_SE_237_2	1	107540476	107560476
																						Breast_SE_237_3	1	107560476	107580476
																						Breast_SE_238_1	1	107588222	107608222
																						Breast_SE_238_2	1	107608222	107628222
																						Breast_SE_238_3	1	107628222	107648222
																						Breast_SE_238_4	1	107648222	107668222
																						Breast_SE_238_5	1	107668222	107688222
																						Breast_SE_238_6	1	107688222	107708222
																						Breast_SE_239_1	1	108185926	108205926
																						Breast_SE_240_1	1	108510874	108530874
																						Breast_SE_240_2	1	108530874	108550874
																						Breast_SE_240_3	1	108550874	108570874
																						Breast_SE_241_1	1	108658006	108678006
																						Breast_SE_241_2	1	108678006	108698006
																						Breast_SE_242_1	1	108810872	108830872
																						Breast_SE_242_2	1	108830872	108850872
																						Breast_SE_243_1	1	108952849	108972849
																						Breast_SE_244_1	1	109034494	109054494
																						Breast_SE_244_2	1	109054494	109074494
																						Breast_SE_244_3	1	109074494	109094494
																						Breast_SE_244_4	1	109094494	109114494
																						Breast_SE_244_5	1	109114494	109134494
																						Breast_SE_244_6	1	109134494	109154494
																						Breast_SE_244_7	1	109154494	109174494
																						Breast_SE_244_8	1	109174494	109194494
																						Breast_SE_244_9	1	109194494	109214494
																						Breast_SE_244_10	1	109214494	109234494
																						Breast_SE_244_11	1	109234494	109254494
																						Breast_SE_244_12	1	109254494	109274494
																						Breast_SE_244_13	1	109274494	109294494
																						Breast_SE_244_14	1	109294494	109314494
																						Breast_SE_245_1	1	109611252	109631252
																						Breast_SE_245_2	1	109631252	109651252
																						Breast_SE_245_3	1	109651252	109671252
																						Breast_SE_246_1	1	109675526	109695526
																						Breast_SE_246_2	1	109695526	109715526
																						Breast_SE_246_3	1	109715526	109735526
																						Breast_SE_246_4	1	109735526	109755526
																						Breast_SE_246_5	1	109755526	109775526
																						Breast_SE_246_6	1	109775526	109795526
																						Breast_SE_246_7	1	109795526	109815526
																						Breast_SE_246_8	1	109815526	109835526
																						Breast_SE_246_9	1	109835526	109855526
																						Breast_SE_246_10	1	109855526	109875526
																						Breast_SE_246_11	1	109875526	109895526
																						Breast_SE_246_12	1	109895526	109915526
																						Breast_SE_246_13	1	109915526	109935526
																						Breast_SE_246_14	1	109935526	109955526
																						Breast_SE_246_15	1	109955526	109975526
																						Breast_SE_246_16	1	109975526	109995526
																						Breast_SE_246_17	1	109995526	110015526
																						Breast_SE_246_18	1	110015526	110035526
																						Breast_SE_246_19	1	110035526	110055526
																						Breast_SE_246_20	1	110055526	110075526
																						Breast_SE_246_21	1	110075526	110095526
																						Breast_SE_246_22	1	110095526	110115526
																						Breast_SE_246_23	1	110115526	110135526
																						Breast_SE_247_1	1	110145481	110165481
																						Breast_SE_247_2	1	110165481	110185481
																						Breast_SE_247_3	1	110185481	110205481
																						Breast_SE_247_4	1	110205481	110225481
																						Breast_SE_247_5	1	110225481	110245481
																						Breast_SE_247_6	1	110245481	110265481
																						Breast_SE_248_1	1	110318441	110338441
																						Breast_SE_248_2	1	110338441	110358441
																						Breast_SE_248_3	1	110358441	110378441
																						Breast_SE_248_4	1	110378441	110398441
																						Breast_SE_248_5	1	110398441	110418441
																						Breast_SE_249_1	1	111175849	111195849
																						Breast_SE_249_2	1	111195849	111215849
																						Breast_SE_249_3	1	111215849	111235849
																						Breast_SE_249_4	1	111235849	111255849
																						Breast_SE_249_5	1	111255849	111275849
																						Breast_SE_250_1	1	111701149	111721149
																						Breast_SE_250_2	1	111721149	111741149
																						Breast_SE_250_3	1	111741149	111761149
																						Breast_SE_251_1	1	112386432	112406432
																						Breast_SE_252_1	1	112593220	112613220
																						Breast_SE_252_2	1	112613220	112633220
																						Breast_SE_252_3	1	112633220	112653220
																						Breast_SE_253_1	1	112653788	112673788
																						Breast_SE_253_2	1	112673788	112693788
																						Breast_SE_253_3	1	112693788	112713788
																						Breast_SE_253_4	1	112713788	112733788
																						Breast_SE_253_5	1	112733788	112753788
																						Breast_SE_254_1	1	112831720	112851720
																						Breast_SE_254_2	1	112851720	112871720
																						Breast_SE_254_3	1	112871720	112891720
																						Breast_SE_255_1	1	113185483	113205483
																						Breast_SE_255_2	1	113205483	113225483
																						Breast_SE_256_1	1	113379789	113399789
																						Breast_SE_257_1	1	113802126	113822126
																						Breast_SE_258_1	1	113919610	113939610
																						Breast_SE_259_1	1	113923828	113943828
																						Breast_SE_260_1	1	114106787	114126787
																						Breast_SE_261_1	1	114466881	114486881
																						Breast_SE_261_2	1	114486881	114506881
																						Breast_SE_261_3	1	114506881	114526881
																						Breast_SE_262_1	1	114745381	114765381
																						Breast_SE_263_1	1	114747183	114767183
																						Breast_SE_264_1	1	114747222	114767222
																						Breast_SE_265_1	1	114747349	114767349
																						Breast_SE_266_1	1	115060257	115080257
																						Breast_SE_266_2	1	115080257	115100257
																						Breast_SE_266_3	1	115100257	115120257
																						Breast_SE_266_4	1	115120257	115140257
																						Breast_SE_267_1	1	115265875	115285875
																						Breast_SE_267_2	1	115285875	115305875
																						Breast_SE_267_3	1	115305875	115325875
																						Breast_SE_267_4	1	115325875	115345875
																						Breast_SE_267_5	1	115345875	115365875
																						Breast_SE_268_1	1	115418232	115438232
																						Breast_SE_269_1	1	115654842	115674842
																						Breast_SE_269_2	1	115674842	115694842
																						Breast_SE_270_1	1	115766017	115786017
																						Breast_SE_270_2	1	115786017	115806017
																						Breast_SE_270_3	1	115806017	115826017
																						Breast_SE_270_4	1	115826017	115846017
																						Breast_SE_271_1	1	116089987	116109987
																						Breast_SE_271_2	1	116109987	116129987
																						Breast_SE_271_3	1	116129987	116149987
																						Breast_SE_271_4	1	116149987	116169987
																						Breast_SE_271_5	1	116169987	116189987
																						Breast_SE_271_6	1	116189987	116209987
																						Breast_SE_272_1	1	116301213	116321213
																						Breast_SE_273_1	1	116304484	116324484
																						Breast_SE_273_2	1	116324484	116344484
																						Breast_SE_273_3	1	116344484	116364484
																						Breast_SE_273_4	1	116364484	116384484
																						Breast_SE_273_5	1	116384484	116404484
																						Breast_SE_273_6	1	116404484	116424484
																						Breast_SE_274_1	1	116441249	116461249
																						Breast_SE_274_2	1	116461249	116481249
																						Breast_SE_274_3	1	116481249	116501249
																						Breast_SE_274_4	1	116501249	116521249
																						Breast_SE_274_5	1	116521249	116541249
																						Breast_SE_274_6	1	116541249	116561249
																						Breast_SE_274_7	1	116561249	116581249
																						Breast_SE_274_8	1	116581249	116601249
																						Breast_SE_274_9	1	116601249	116621249
																						Breast_SE_274_10	1	116621249	116641249
																						Breast_SE_275_1	1	116655540	116675540
																						Breast_SE_275_2	1	116675540	116695540
																						Breast_SE_276_1	1	116863435	116883435
																						Breast_SE_276_2	1	116883435	116903435
																						Breast_SE_276_3	1	116903435	116923435
																						Breast_SE_276_4	1	116923435	116943435
																						Breast_SE_277_1	1	117145176	117165176
																						Breast_SE_277_2	1	117165176	117185176
																						Breast_SE_277_3	1	117185176	117205176
																						Breast_SE_277_4	1	117205176	117225176
																						Breast_SE_277_5	1	117225176	117245176
																						Breast_SE_277_6	1	117245176	117265176
																						Breast_SE_277_7	1	117265176	117285176
																						Breast_SE_278_1	1	117335977	117355977
																						Breast_SE_278_2	1	117355977	117375977
																						Breast_SE_279_1	1	117527015	117547015
																						Breast_SE_279_2	1	117547015	117567015
																						Breast_SE_279_3	1	117567015	117587015
																						Breast_SE_279_4	1	117587015	117607015
																						Breast_SE_279_5	1	117607015	117627015
																						Breast_SE_279_6	1	117627015	117647015
																						Breast_SE_279_7	1	117647015	117667015
																						Breast_SE_279_8	1	117667015	117687015
																						Breast_SE_279_9	1	117687015	117707015
																						Breast_SE_280_1	1	118918976	118938976
																						Breast_SE_280_2	1	118938976	118958976
																						Breast_SE_280_3	1	118958976	118978976
																						Breast_SE_280_4	1	118978976	118998976
																						Breast_SE_280_5	1	118998976	119018976
																						Breast_SE_281_1	1	119628979	119648979
																						Breast_SE_281_2	1	119648979	119668979
																						Breast_SE_281_3	1	119668979	119688979
																						Breast_SE_282_1	1	119709549	119729549
																						Breast_SE_282_2	1	119729549	119749549
																						Breast_SE_283_1	1	119758821	119778821
																						Breast_SE_283_2	1	119778821	119798821
																						Breast_SE_284_1	1	145682843	145702843
																						Breast_SE_284_2	1	145702843	145722843
																						Breast_SE_285_1	1	145806405	145826405
																						Breast_SE_285_2	1	145826405	145846405
																						Breast_SE_285_3	1	145846405	145866405
																						Breast_SE_285_4	1	145866405	145886405
																						Breast_SE_285_5	1	145886405	145906405
																						Breast_SE_285_6	1	145906405	145926405
																						Breast_SE_285_7	1	145926405	145946405
																						Breast_SE_285_8	1	145946405	145966405
																						Breast_SE_285_9	1	145966405	145986405
																						Breast_SE_285_10	1	145986405	146006405
																						Breast_SE_285_11	1	146006405	146026405
																						Breast_SE_286_1	1	146022636	146042636
																						Breast_SE_286_2	1	146042636	146062636
																						Breast_SE_287_1	1	147157653	147177653
																						Breast_SE_288_1	1	147493421	147513421
																						Breast_SE_288_2	1	147513421	147533421
																						Breast_SE_288_3	1	147533421	147553421
																						Breast_SE_289_1	1	147623042	147643042
																						Breast_SE_289_2	1	147643042	147663042
																						Breast_SE_289_3	1	147663042	147683042
																						Breast_SE_290_1	1	147741896	147761896
																						Breast_SE_290_2	1	147761896	147781896
																						Breast_SE_291_1	1	148365859	148385859
																						Breast_SE_291_2	1	148385859	148405859
																						Breast_SE_291_3	1	148405859	148425859
																						Breast_SE_291_4	1	148425859	148445859
																						Breast_SE_292_1	1	149871259	149891259
																						Breast_SE_292_2	1	149891259	149911259
																						Breast_SE_292_3	1	149911259	149931259
																						Breast_SE_292_4	1	149931259	149951259
																						Breast_SE_293_1	1	149975965	149995965
																						Breast_SE_293_2	1	149995965	150015965
																						Breast_SE_294_1	1	150133003	150153003
																						Breast_SE_294_2	1	150153003	150173003
																						Breast_SE_294_3	1	150173003	150193003
																						Breast_SE_295_1	1	150207966	150227966
																						Breast_SE_295_2	1	150227966	150247966
																						Breast_SE_295_3	1	150247966	150267966
																						Breast_SE_295_4	1	150267966	150287966
																						Breast_SE_295_5	1	150287966	150307966
																						Breast_SE_296_1	1	150346567	150366567
																						Breast_SE_296_2	1	150366567	150386567
																						Breast_SE_296_3	1	150386567	150406567
																						Breast_SE_296_4	1	150406567	150426567
																						Breast_SE_297_1	1	150500581	150520581
																						Breast_SE_297_2	1	150520581	150540581
																						Breast_SE_297_3	1	150540581	150560581
																						Breast_SE_297_4	1	150560581	150580581
																						Breast_SE_297_5	1	150580581	150600581
																						Breast_SE_297_6	1	150600581	150620581
																						Breast_SE_297_7	1	150620581	150640581
																						Breast_SE_297_8	1	150640581	150660581
																						Breast_SE_298_1	1	150937601	150957601
																						Breast_SE_298_2	1	150957601	150977601
																						Breast_SE_298_3	1	150977601	150997601
																						Breast_SE_298_4	1	150997601	151017601
																						Breast_SE_299_1	1	151015670	151035670
																						Breast_SE_299_2	1	151035670	151055670
																						Breast_SE_299_3	1	151055670	151075670
																						Breast_SE_299_4	1	151075670	151095670
																						Breast_SE_300_1	1	151178958	151198958
																						Breast_SE_300_2	1	151198958	151218958
																						Breast_SE_300_3	1	151218958	151238958
																						Breast_SE_301_1	1	151241199	151261199
																						Breast_SE_301_2	1	151261199	151281199
																						Breast_SE_301_3	1	151281199	151301199
																						Breast_SE_301_4	1	151301199	151321199
																						Breast_SE_301_5	1	151321199	151341199
																						Breast_SE_301_6	1	151341199	151361199
																						Breast_SE_301_7	1	151361199	151381199
																						Breast_SE_302_1	1	151391753	151411753
																						Breast_SE_303_1	1	151488978	151508978
																						Breast_SE_303_2	1	151508978	151528978
																						Breast_SE_303_3	1	151528978	151548978
																						Breast_SE_303_4	1	151548978	151568978
																						Breast_SE_303_5	1	151568978	151588978
																						Breast_SE_303_6	1	151588978	151608978
																						Breast_SE_303_7	1	151608978	151628978
																						Breast_SE_304_1	1	151702583	151722583
																						Breast_SE_304_2	1	151722583	151742583
																						Breast_SE_305_1	1	151751760	151771760
																						Breast_SE_305_2	1	151771760	151791760
																						Breast_SE_305_3	1	151791760	151811760
																						Breast_SE_305_4	1	151811760	151831760
																						Breast_SE_305_5	1	151831760	151851760
																						Breast_SE_305_6	1	151851760	151871760
																						Breast_SE_305_7	1	151871760	151891760
																						Breast_SE_305_8	1	151891760	151911760
																						Breast_SE_305_9	1	151911760	151931760
																						Breast_SE_306_1	1	151935014	151955014
																						Breast_SE_306_2	1	151955014	151975014
																						Breast_SE_306_3	1	151975014	151995014
																						Breast_SE_306_4	1	151995014	152015014
																						Breast_SE_306_5	1	152015014	152035014
																						Breast_SE_306_6	1	152035014	152055014
																						Breast_SE_307_1	1	152139443	152159443
																						Breast_SE_307_2	1	152159443	152179443
																						Breast_SE_307_3	1	152179443	152199443
																						Breast_SE_308_1	1	152859674	152879674
																						Breast_SE_308_2	1	152879674	152899674
																						Breast_SE_308_3	1	152899674	152919674
																						Breast_SE_308_4	1	152919674	152939674
																						Breast_SE_308_5	1	152939674	152959674
																						Breast_SE_308_6	1	152959674	152979674
																						Breast_SE_309_1	1	153342223	153362223
																						Breast_SE_309_2	1	153362223	153382223
																						Breast_SE_309_3	1	153382223	153402223
																						Breast_SE_309_4	1	153402223	153422223
																						Breast_SE_309_5	1	153422223	153442223
																						Breast_SE_310_1	1	153454265	153474265
																						Breast_SE_310_2	1	153474265	153494265
																						Breast_SE_310_3	1	153494265	153514265
																						Breast_SE_310_4	1	153514265	153534265
																						Breast_SE_310_5	1	153534265	153554265
																						Breast_SE_310_6	1	153554265	153574265
																						Breast_SE_310_7	1	153574265	153594265
																						Breast_SE_310_8	1	153594265	153614265
																						Breast_SE_310_9	1	153614265	153634265
																						Breast_SE_310_10	1	153634265	153654265
																						Breast_SE_310_11	1	153654265	153674265
																						Breast_SE_310_12	1	153674265	153694265
																						Breast_SE_310_13	1	153694265	153714265
																						Breast_SE_311_1	1	153723704	153743704
																						Breast_SE_311_2	1	153743704	153763704
																						Breast_SE_311_3	1	153763704	153783704
																						Breast_SE_311_4	1	153783704	153803704
																						Breast_SE_311_5	1	153803704	153823704
																						Breast_SE_312_1	1	153897651	153917651
																						Breast_SE_312_2	1	153917651	153937651
																						Breast_SE_312_3	1	153937651	153957651
																						Breast_SE_312_4	1	153957651	153977651
																						Breast_SE_312_5	1	153977651	153997651
																						Breast_SE_312_6	1	153997651	154017651
																						Breast_SE_313_1	1	154156503	154176503
																						Breast_SE_313_2	1	154176503	154196503
																						Breast_SE_313_3	1	154196503	154216503
																						Breast_SE_313_4	1	154216503	154236503
																						Breast_SE_313_5	1	154236503	154256503
																						Breast_SE_313_6	1	154256503	154276503
																						Breast_SE_314_1	1	154383936	154403936
																						Breast_SE_314_2	1	154403936	154423936
																						Breast_SE_314_3	1	154423936	154443936
																						Breast_SE_314_4	1	154443936	154463936
																						Breast_SE_314_5	1	154463936	154483936
																						Breast_SE_314_6	1	154483936	154503936
																						Breast_SE_315_1	1	154594175	154614175
																						Breast_SE_315_2	1	154614175	154634175
																						Breast_SE_316_1	1	154896696	154916696
																						Breast_SE_316_2	1	154916696	154936696
																						Breast_SE_316_3	1	154936696	154956696
																						Breast_SE_316_4	1	154956696	154976696
																						Breast_SE_316_5	1	154976696	154996696
																						Breast_SE_316_6	1	154996696	155016696
																						Breast_SE_316_7	1	155016696	155036696
																						Breast_SE_316_8	1	155036696	155056696
																						Breast_SE_316_9	1	155056696	155076696
																						Breast_SE_316_10	1	155076696	155096696
																						Breast_SE_316_11	1	155096696	155116696
																						Breast_SE_316_12	1	155116696	155136696
																						Breast_SE_316_13	1	155136696	155156696
																						Breast_SE_317_1	1	155151140	155171140
																						Breast_SE_317_2	1	155171140	155191140
																						Breast_SE_317_3	1	155191140	155211140
																						Breast_SE_317_4	1	155211140	155231140
																						Breast_SE_317_5	1	155231140	155251140
																						Breast_SE_317_6	1	155251140	155271140
																						Breast_SE_317_7	1	155271140	155291140
																						Breast_SE_317_8	1	155291140	155311140
																						Breast_SE_317_9	1	155311140	155331140
																						Breast_SE_317_10	1	155331140	155351140
																						Breast_SE_318_1	1	155552816	155572816
																						Breast_SE_319_1	1	155555128	155575128
																						Breast_SE_320_1	1	155634170	155654170
																						Breast_SE_320_2	1	155654170	155674170
																						Breast_SE_321_1	1	155674847	155694847
																						Breast_SE_321_2	1	155694847	155714847
																						Breast_SE_322_1	1	155881803	155901803
																						Breast_SE_322_2	1	155901803	155921803
																						Breast_SE_322_3	1	155921803	155941803
																						Breast_SE_322_4	1	155941803	155961803
																						Breast_SE_322_5	1	155961803	155981803
																						Breast_SE_322_6	1	155981803	156001803
																						Breast_SE_322_7	1	156001803	156021803
																						Breast_SE_322_8	1	156021803	156041803
																						Breast_SE_322_9	1	156041803	156061803
																						Breast_SE_322_10	1	156061803	156081803
																						Breast_SE_322_11	1	156081803	156101803
																						Breast_SE_322_12	1	156101803	156121803
																						Breast_SE_322_13	1	156121803	156141803
																						Breast_SE_322_14	1	156141803	156161803
																						Breast_SE_322_15	1	156161803	156181803
																						Breast_SE_322_16	1	156181803	156201803
																						Breast_SE_322_17	1	156201803	156221803
																						Breast_SE_322_18	1	156221803	156241803
																						Breast_SE_322_19	1	156241803	156261803
																						Breast_SE_322_20	1	156261803	156281803
																						Breast_SE_322_21	1	156281803	156301803
																						Breast_SE_322_22	1	156301803	156321803
																						Breast_SE_322_23	1	156321803	156341803
																						Breast_SE_323_1	1	156440801	156460801
																						Breast_SE_323_2	1	156460801	156480801
																						Breast_SE_323_3	1	156480801	156500801
																						Breast_SE_323_4	1	156500801	156520801
																						Breast_SE_323_5	1	156520801	156540801
																						Breast_SE_324_1	1	156637984	156657984
																						Breast_SE_324_2	1	156657984	156677984
																						Breast_SE_324_3	1	156677984	156697984
																						Breast_SE_324_4	1	156697984	156717984
																						Breast_SE_324_5	1	156717984	156737984
																						Breast_SE_324_6	1	156737984	156757984
																						Breast_SE_324_7	1	156757984	156777984
																						Breast_SE_324_8	1	156777984	156797984
																						Breast_SE_324_9	1	156797984	156817984
																						Breast_SE_325_1	1	156849968	156869968
																						Breast_SE_325_2	1	156869968	156889968
																						Breast_SE_325_3	1	156889968	156909968
																						Breast_SE_325_4	1	156909968	156929968
																						Breast_SE_326_1	1	157069049	157089049
																						Breast_SE_326_2	1	157089049	157109049
																						Breast_SE_326_3	1	157109049	157129049
																						Breast_SE_326_4	1	157129049	157149049
																						Breast_SE_326_5	1	157149049	157169049
																						Breast_SE_326_6	1	157169049	157189049
																						Breast_SE_327_1	1	157985626	158005626
																						Breast_SE_327_2	1	158005626	158025626
																						Breast_SE_327_3	1	158025626	158045626
																						Breast_SE_327_4	1	158045626	158065626
																						Breast_SE_327_5	1	158065626	158085626
																						Breast_SE_327_6	1	158085626	158105626
																						Breast_SE_328_1	1	159589046	159609046
																						Breast_SE_329_1	1	159793897	159813897
																						Breast_SE_329_2	1	159813897	159833897
																						Breast_SE_329_3	1	159833897	159853897
																						Breast_SE_329_4	1	159853897	159873897
																						Breast_SE_329_5	1	159873897	159893897
																						Breast_SE_329_6	1	159893897	159913897
																						Breast_SE_329_7	1	159913897	159933897
																						Breast_SE_329_8	1	159933897	159953897
																						Breast_SE_329_9	1	159953897	159973897
																						Breast_SE_330_1	1	160043922	160063922
																						Breast_SE_330_2	1	160063922	160083922
																						Breast_SE_330_3	1	160083922	160103922
																						Breast_SE_330_4	1	160103922	160123922
																						Breast_SE_330_5	1	160123922	160143922
																						Breast_SE_330_6	1	160143922	160163922
																						Breast_SE_330_7	1	160163922	160183922
																						Breast_SE_330_8	1	160183922	160203922
																						Breast_SE_330_9	1	160203922	160223922
																						Breast_SE_331_1	1	160252398	160272398
																						Breast_SE_332_1	1	160339426	160359426
																						Breast_SE_332_2	1	160359426	160379426
																						Breast_SE_333_1	1	160397697	160417697
																						Breast_SE_334_1	1	160978509	160998509
																						Breast_SE_334_2	1	160998509	161018509
																						Breast_SE_334_3	1	161018509	161038509
																						Breast_SE_334_4	1	161038509	161058509
																						Breast_SE_335_1	1	161058084	161078084
																						Breast_SE_335_2	1	161078084	161098084
																						Breast_SE_335_3	1	161098084	161118084
																						Breast_SE_335_4	1	161118084	161138084
																						Breast_SE_335_5	1	161138084	161158084
																						Breast_SE_335_6	1	161158084	161178084
																						Breast_SE_335_7	1	161178084	161198084
																						Breast_SE_335_8	1	161198084	161218084
																						Breast_SE_335_9	1	161218084	161238084
																						Breast_SE_336_1	1	161350889	161370889
																						Breast_SE_336_2	1	161370889	161390889
																						Breast_SE_336_3	1	161390889	161410889
																						Breast_SE_336_4	1	161410889	161430889
																						Breast_SE_337_1	1	161479526	161499526
																						Breast_SE_337_2	1	161499526	161519526
																						Breast_SE_337_3	1	161519526	161539526
																						Breast_SE_337_4	1	161539526	161559526
																						Breast_SE_337_5	1	161559526	161579526
																						Breast_SE_338_1	1	161716183	161736183
																						Breast_SE_338_2	1	161736183	161756183
																						Breast_SE_339_1	1	161922901	161942901
																						Breast_SE_339_2	1	161942901	161962901
																						Breast_SE_339_3	1	161962901	161982901
																						Breast_SE_339_4	1	161982901	162002901
																						Breast_SE_339_5	1	162002901	162022901
																						Breast_SE_339_6	1	162022901	162042901
																						Breast_SE_340_1	1	162131121	162151121
																						Breast_SE_340_2	1	162151121	162171121
																						Breast_SE_340_3	1	162171121	162191121
																						Breast_SE_340_4	1	162191121	162211121
																						Breast_SE_340_5	1	162211121	162231121
																						Breast_SE_341_1	1	162519138	162539138
																						Breast_SE_341_2	1	162539138	162559138
																						Breast_SE_341_3	1	162559138	162579138
																						Breast_SE_341_4	1	162579138	162599138
																						Breast_SE_341_5	1	162599138	162619138
																						Breast_SE_341_6	1	162619138	162639138
																						Breast_SE_342_1	1	162844306	162864306
																						Breast_SE_342_2	1	162864306	162884306
																						Breast_SE_342_3	1	162884306	162904306
																						Breast_SE_342_4	1	162904306	162924306
																						Breast_SE_343_1	1	164548104	164568104
																						Breast_SE_343_2	1	164568104	164588104
																						Breast_SE_343_3	1	164588104	164608104
																						Breast_SE_343_4	1	164608104	164628104
																						Breast_SE_343_5	1	164628104	164648104
																						Breast_SE_343_6	1	164648104	164668104
																						Breast_SE_343_7	1	164668104	164688104
																						Breast_SE_343_8	1	164688104	164708104
																						Breast_SE_343_9	1	164708104	164728104
																						Breast_SE_343_10	1	164728104	164748104
																						Breast_SE_343_11	1	164748104	164768104
																						Breast_SE_343_12	1	164768104	164788104
																						Breast_SE_343_13	1	164788104	164808104
																						Breast_SE_343_14	1	164808104	164828104
																						Breast_SE_344_1	1	165687150	165707150
																						Breast_SE_345_1	1	165821619	165841619
																						Breast_SE_345_2	1	165841619	165861619
																						Breast_SE_345_3	1	165861619	165881619
																						Breast_SE_345_4	1	165881619	165901619
																						Breast_SE_345_5	1	165901619	165921619
																						Breast_SE_346_1	1	166157184	166177184
																						Breast_SE_346_2	1	166177184	166197184
																						Breast_SE_347_1	1	167198303	167218303
																						Breast_SE_347_2	1	167218303	167238303
																						Breast_SE_348_1	1	167537762	167557762
																						Breast_SE_348_2	1	167557762	167577762
																						Breast_SE_349_1	1	167595015	167615015
																						Breast_SE_349_2	1	167615015	167635015
																						Breast_SE_349_3	1	167635015	167655015
																						Breast_SE_349_4	1	167655015	167675015
																						Breast_SE_349_5	1	167675015	167695015
																						Breast_SE_350_1	1	167709293	167729293
																						Breast_SE_350_2	1	167729293	167749293
																						Breast_SE_350_3	1	167749293	167769293
																						Breast_SE_350_4	1	167769293	167789293
																						Breast_SE_350_5	1	167789293	167809293
																						Breast_SE_351_1	1	167900561	167920561
																						Breast_SE_351_2	1	167920561	167940561
																						Breast_SE_351_3	1	167940561	167960561
																						Breast_SE_352_1	1	168194954	168214954
																						Breast_SE_352_2	1	168214954	168234954
																						Breast_SE_352_3	1	168234954	168254954
																						Breast_SE_353_1	1	169092407	169112407
																						Breast_SE_353_2	1	169112407	169132407
																						Breast_SE_353_3	1	169132407	169152407
																						Breast_SE_353_4	1	169152407	169172407
																						Breast_SE_354_1	1	169496822	169516822
																						Breast_SE_354_2	1	169516822	169536822
																						Breast_SE_354_3	1	169536822	169556822
																						Breast_SE_355_1	1	169861738	169881738
																						Breast_SE_355_2	1	169881738	169901738
																						Breast_SE_356_1	1	170246053	170266053
																						Breast_SE_356_2	1	170266053	170286053
																						Breast_SE_356_3	1	170286053	170306053
																						Breast_SE_356_4	1	170306053	170326053
																						Breast_SE_357_1	1	170546282	170566282
																						Breast_SE_357_2	1	170566282	170586282
																						Breast_SE_357_3	1	170586282	170606282
																						Breast_SE_358_1	1	170658199	170678199
																						Breast_SE_358_2	1	170678199	170698199
																						Breast_SE_358_3	1	170698199	170718199
																						Breast_SE_358_4	1	170718199	170738199
																						Breast_SE_359_1	1	171122842	171142842
																						Breast_SE_359_2	1	171142842	171162842
																						Breast_SE_360_1	1	171174405	171194405
																						Breast_SE_360_2	1	171194405	171214405
																						Breast_SE_360_3	1	171214405	171234405
																						Breast_SE_361_1	1	171413902	171433902
																						Breast_SE_361_2	1	171433902	171453902
																						Breast_SE_362_1	1	171573059	171593059
																						Breast_SE_362_2	1	171593059	171613059
																						Breast_SE_362_3	1	171613059	171633059
																						Breast_SE_363_1	1	172114319	172134319
																						Breast_SE_363_2	1	172134319	172154319
																						Breast_SE_363_3	1	172154319	172174319
																						Breast_SE_363_4	1	172174319	172194319
																						Breast_SE_363_5	1	172194319	172214319
																						Breast_SE_363_6	1	172214319	172234319
																						Breast_SE_363_7	1	172234319	172254319
																						Breast_SE_363_8	1	172254319	172274319
																						Breast_SE_363_9	1	172274319	172294319
																						Breast_SE_363_10	1	172294319	172314319
																						Breast_SE_363_11	1	172314319	172334319
																						Breast_SE_363_12	1	172334319	172354319
																						Breast_SE_363_13	1	172354319	172374319
																						Breast_SE_363_14	1	172374319	172394319
																						Breast_SE_363_15	1	172394319	172414319
																						Breast_SE_363_16	1	172414319	172434319
																						Breast_SE_363_17	1	172434319	172454319
																						Breast_SE_364_1	1	172523630	172543630
																						Breast_SE_365_1	1	172853319	172873319
																						Breast_SE_365_2	1	172873319	172893319
																						Breast_SE_365_3	1	172893319	172913319
																						Breast_SE_365_4	1	172913319	172933319
																						Breast_SE_365_5	1	172933319	172953319
																						Breast_SE_365_6	1	172953319	172973319
																						Breast_SE_365_7	1	172973319	172993319
																						Breast_SE_365_8	1	172993319	173013319
																						Breast_SE_366_1	1	173846814	173866814
																						Breast_SE_366_2	1	173866814	173886814
																						Breast_SE_367_1	1	174963245	174983245
																						Breast_SE_367_2	1	174983245	175003245
																						Breast_SE_367_3	1	175003245	175023245
																						Breast_SE_367_4	1	175023245	175043245
																						Breast_SE_368_1	1	175136629	175156629
																						Breast_SE_368_2	1	175156629	175176629
																						Breast_SE_368_3	1	175176629	175196629
																						Breast_SE_368_4	1	175196629	175216629
																						Breast_SE_368_5	1	175216629	175236629
																						Breast_SE_369_1	1	178022558	178042558
																						Breast_SE_369_2	1	178042558	178062558
																						Breast_SE_370_1	1	178115696	178135696
																						Breast_SE_370_2	1	178135696	178155696
																						Breast_SE_370_3	1	178155696	178175696
																						Breast_SE_371_1	1	178213726	178233726
																						Breast_SE_371_2	1	178233726	178253726
																						Breast_SE_371_3	1	178253726	178273726
																						Breast_SE_371_4	1	178273726	178293726
																						Breast_SE_371_5	1	178293726	178313726
																						Breast_SE_372_1	1	178527258	178547258
																						Breast_SE_373_1	1	179011970	179031970
																						Breast_SE_374_1	1	179072823	179092823
																						Breast_SE_374_2	1	179092823	179112823
																						Breast_SE_374_3	1	179112823	179132823
																						Breast_SE_374_4	1	179132823	179152823
																						Breast_SE_375_1	1	179251612	179271612
																						Breast_SE_375_2	1	179271612	179291612
[truncated: 26,053 more rows]
